# Supplementary material for: A general strategy for diversifying complex natural products to polycyclic scaffolds with medium-sized rings
Source: PubMed Central journal article supplement (PMC6728360; doi:10.1038/s41467-019-11976-2), 2019-09-05
Supplement: 41467_2019_11976_MOESM1_ESM.pdf [file 41467_2019_11976_MOESM1_ESM.pdf]

## **Supplementary Information**

**A general strategy for diversifying complex natural products to polycyclic scaffolds with medium-sized rings**

Zhao et al

## Table of Contents

|                                                                                                                      |       |
|----------------------------------------------------------------------------------------------------------------------|-------|
| <b>I. Supplementary Discussion</b>                                                                                   |       |
| Supplementary Figures 1-4.....                                                                                       | 3     |
| <b>II. Supplementary Methods: Experimental procedures and characterization data</b>                                  |       |
| General remarks.....                                                                                                 | 8     |
| General procedure.....                                                                                               | 9     |
| A-ring expansion of dehydroepiandrosterone (DHEA) and cholesterol.....                                               | 11    |
| Supplementary Figure 5. Synthesis of <b>3a</b> , <b>3b</b> , <b>4a</b> , <b>5a-c</b> , <b>6a</b> and <b>6b</b> ..... | 11    |
| D-ring expansion of isosteviol.....                                                                                  | 16    |
| Supplementary Figure 6. Syntheses of <b>8-10</b> .....                                                               | 17    |
| D-ring expansion of dehydroepiandrosterone (DHEA) and estrone.....                                                   | 19    |
| Supplementary Figure 7. Syntheses of medium ring scaffold <b>14-18</b> .....                                         | 19    |
| C-H oxidation/ring expansion of dehydroepiandrosterone, cholesterol, isosteviol, estrone and diosgenin.....          | 24    |
| Supplementary Figure 8. Electrochemical allylic oxidation/ring expansion of natural products... 25                   |       |
| Supplementary Figure 9. Syntheses of <b>24</b> .....                                                                 | 29    |
| Supplementary Figure 10. Copper-mediated C-H oxidation/C-ring expansion of DHEA and estrone.....                     | 31    |
| Supplementary Figure 11. Benzylic C-H oxidation.....                                                                 | 34    |
| C-H oxidation/ring expansion of picfeltaarraegenin and kirenol.....                                                  | 35    |
| Supplementary Figure 12. C-H oxidation/ring expansion of picfeltaarraegenin and kirenol.....                         | 35    |
| Derivatization of medium ring scaffolds.....                                                                         | 40    |
| Supplementary Figure 13. Formation of carbamates.....                                                                | 40    |
| Supplementary Figure 14. Synthesis of azide.....                                                                     | 66    |
| Supplementary Figure 15. Synthesis of imides.....                                                                    | 68    |
| Supplementary Figure 16. Ring-cleavage of <b>5b</b> and <b>5c</b> .....                                              | 84    |
| Cheminformatic analysis of medium ring library.....                                                                  | 93    |
| Supplementary Figure 17-20.....                                                                                      | 94-96 |
| X-Ray reports.....                                                                                                   | 100   |
| Supplementary Figure 26-236 (Copies of NMR spectra).....                                                             | 119   |
| Supplementary Figure 237-318 (Copies of LC-MS spectra).....                                                          | 324   |
| <b>III. Supplementary References</b> .....                                                                           | 362   |

## I. Supplementary Discussion

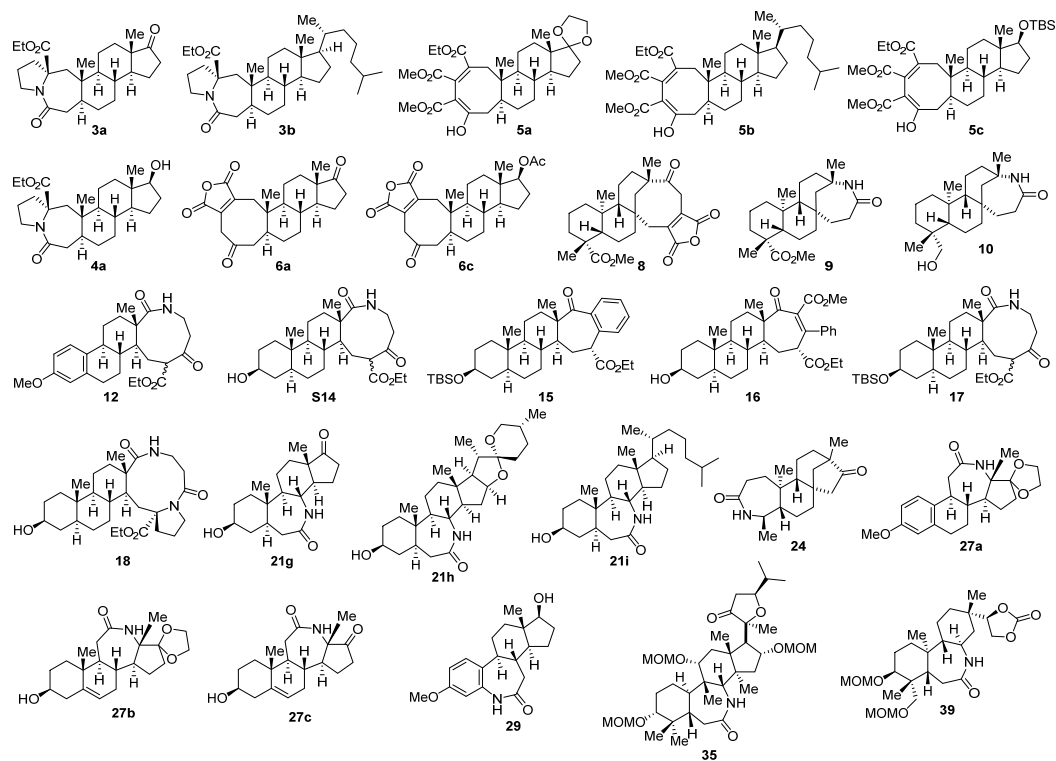

Supplementary Figure 1. Medium-sized ring scaffolds.

Derived from S14.

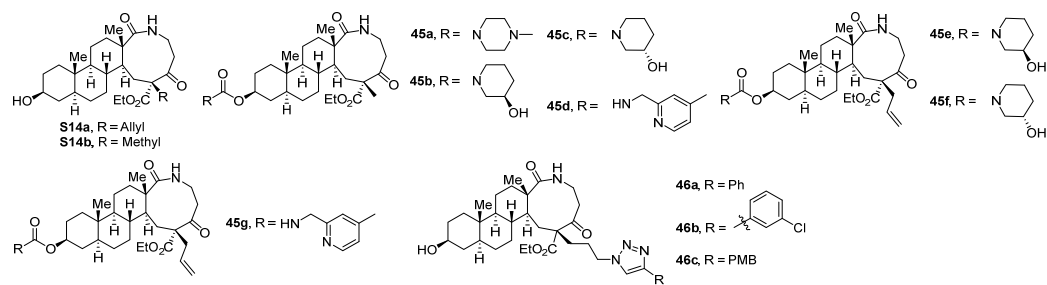

Derived from 6a and 8.

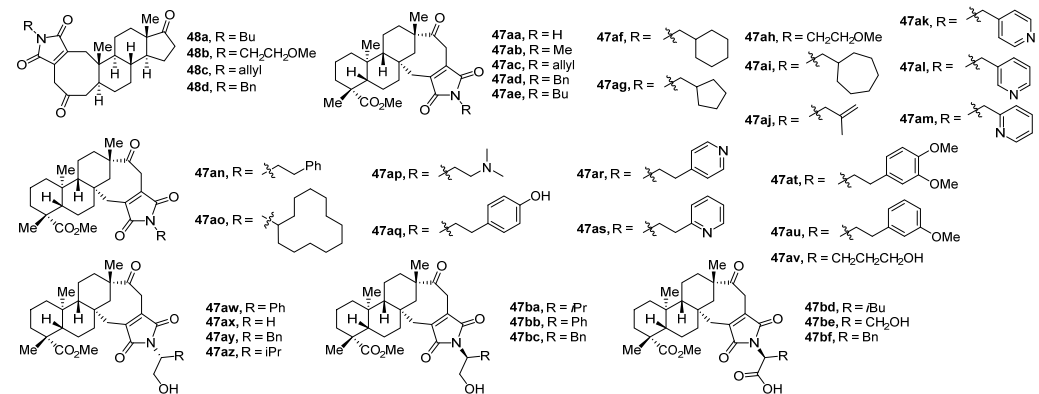

Supplementary Figure 2. Full compound set (continued on next page).

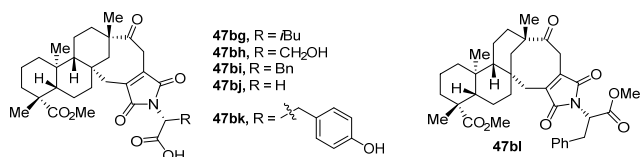

Derived from **4a**

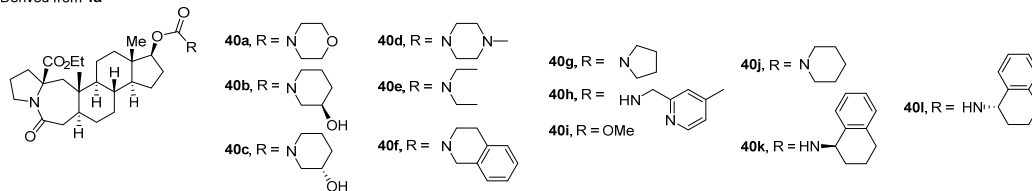

Derived from **15**

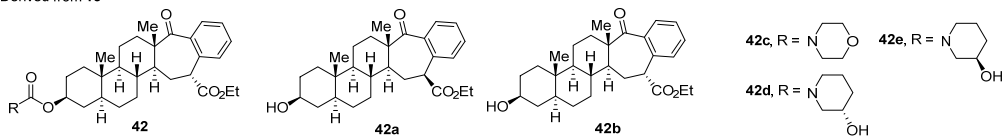

Derived from **21g**

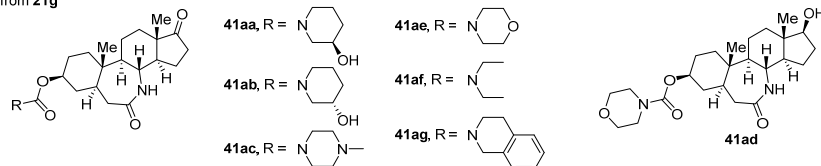

Derived from **21i**

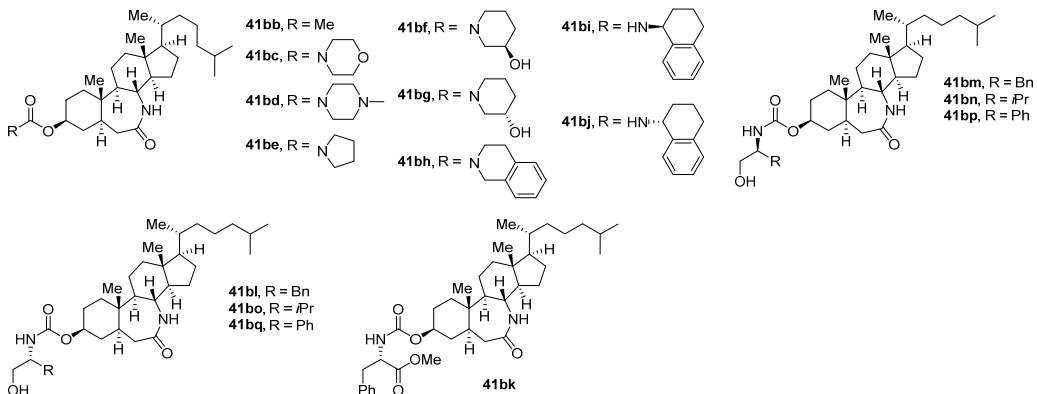

Derived from **21h**

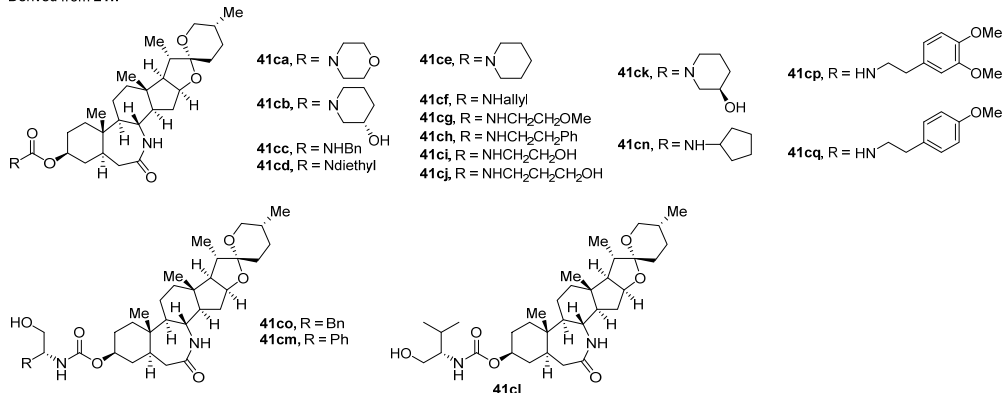

Supplementary Figure 2 (continued). Full compound set (continued on next page).

Derived from 29.

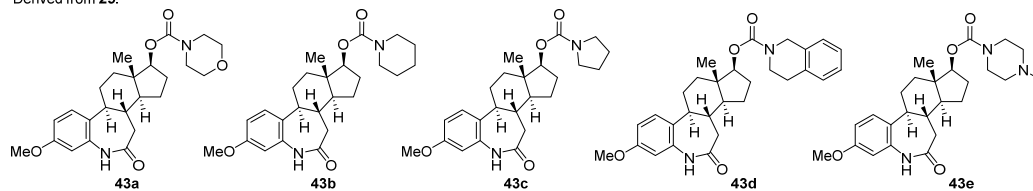

Derived from 5b and 5c.

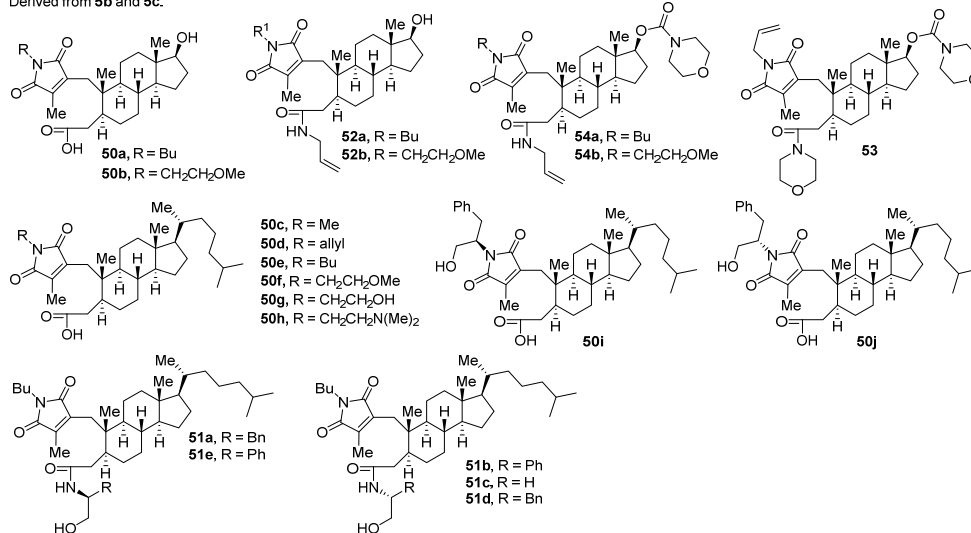

**Supplementary Figure 2 (continued). Full compound set.**

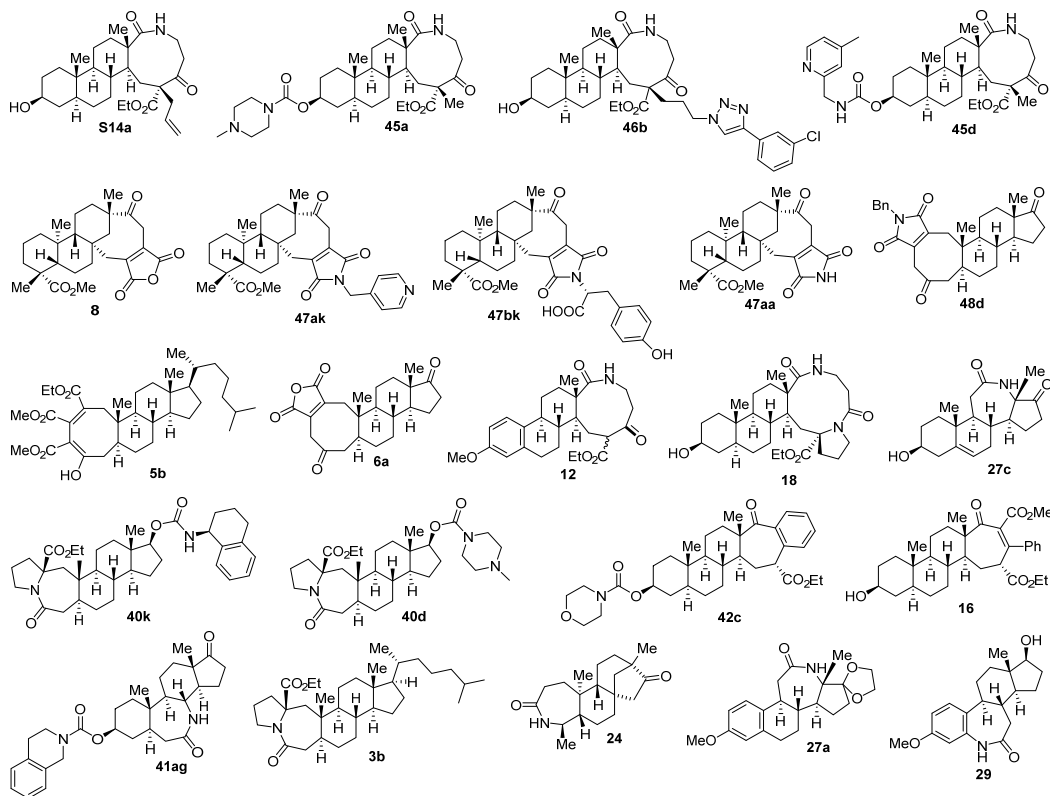

**Supplementary Figure 3. Medium sized ring library used in PCA and PMI analyses (continued on next page) (30 structures).**

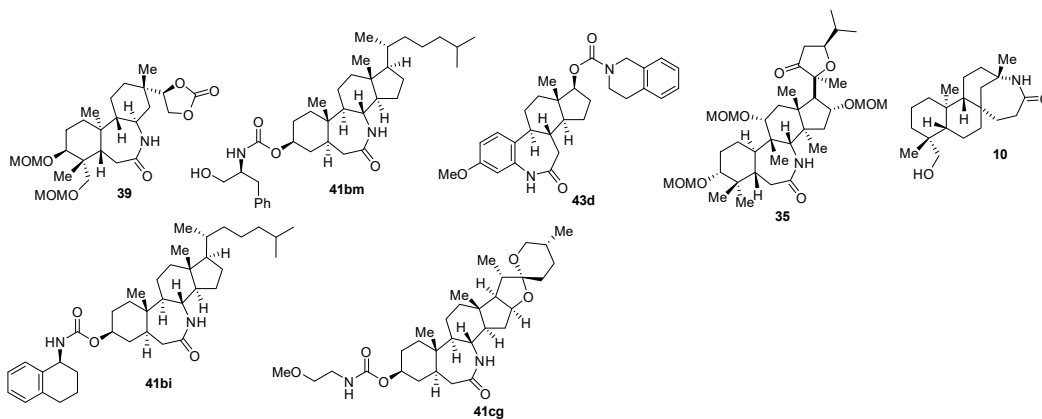

**Supplementary Figure 3 (continued). Medium sized ring library used in PCA and PMI analyses (30 structures).**

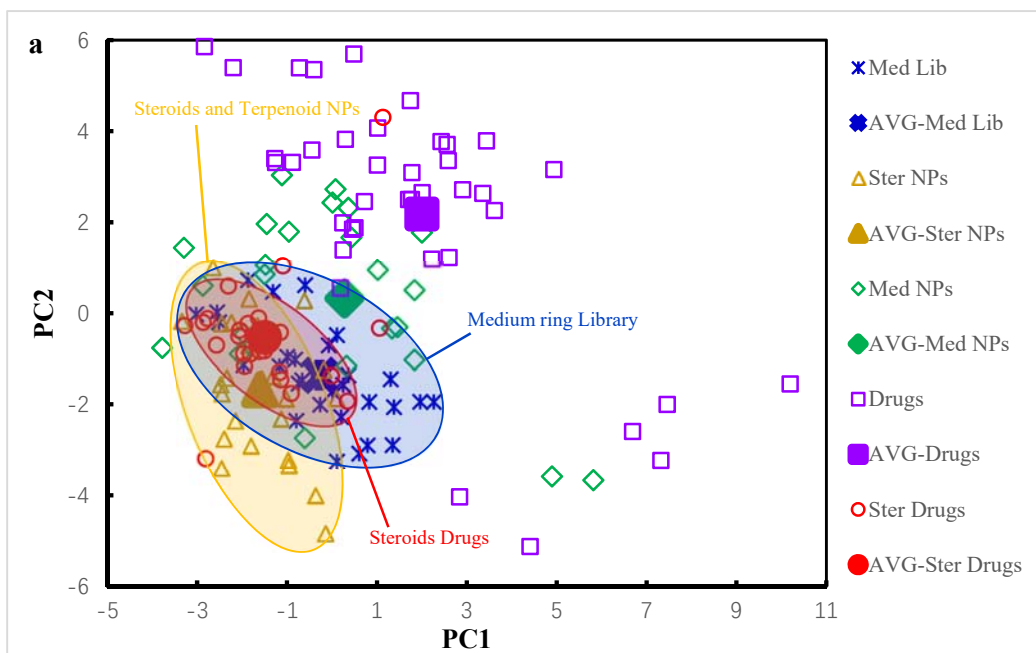

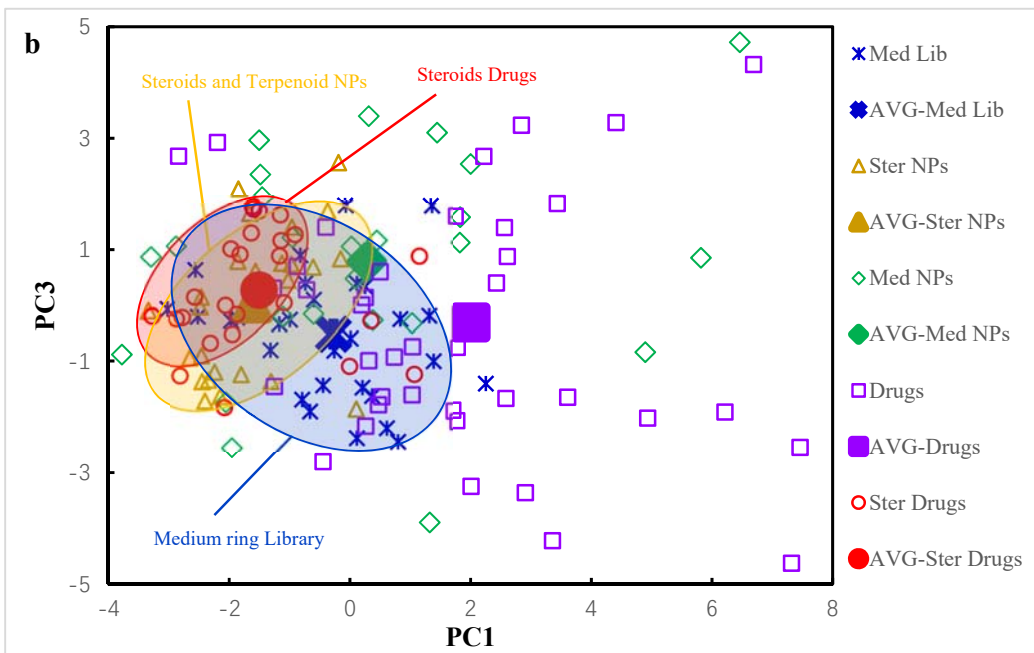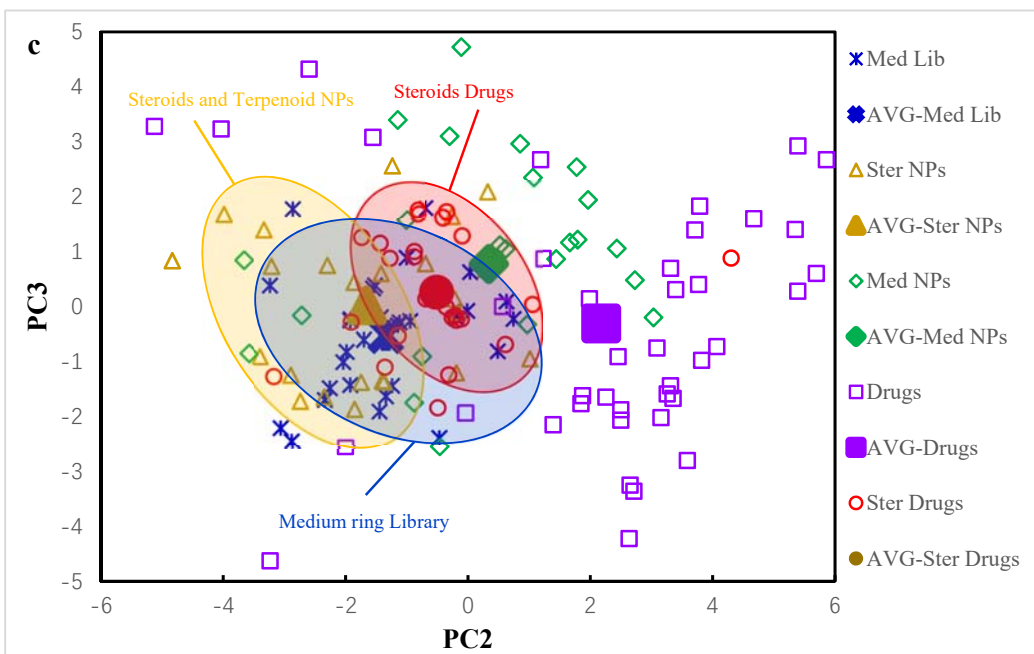

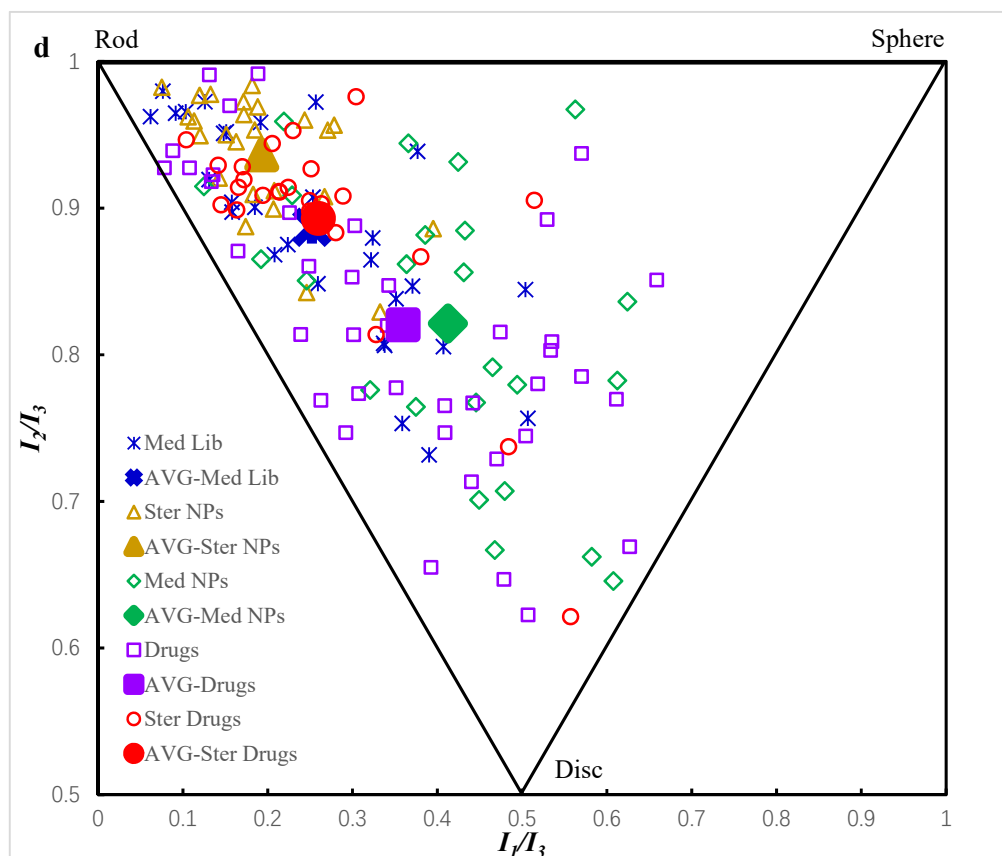

**Supplementary Figure 4. Cheminformatic analyses of medium ring library.** Expanded version of PCA and PMI plots of 30 medium ring library (Med Lib) members, established reference sets of 40 top selling drugs in 2016 (Drugs), 25 top steroid drugs by prescriptions and retail sales in 2016 (Ster Drugs), 25 diverse steroids and terpenoid natural products (NPs) and 25 diverse medium ring natural products (Med NPs). The hypothetical average structure for each series (-AVG) is also shown. **a.** PCA plot of PC1 versus PC2. **b.** PCA plot of PC1 versus PC3. **c.** PCA plot of PC2 versus PC3. **d.** PMI plot showing the three-dimensional shape of the lowest energy conformations of each compound. 72% of the total variation is represented in the first three principal components. There are significant overlaps between the synthesized medium ring scaffolds and steroid drugs and steroids and terpenoid natural products. See **Supplementary Data Set** for complete data and **Supplementary Methods** for details on parameter and compound selection.

## II. Supplementary Methods: Experimental procedures and characterization data.

### General remarks.

All reactions in non-aqueous media were conducted under a positive pressure of dry argon in glassware that had been dried in oven prior to use unless noted otherwise. Anhydrous solutions of reaction mixtures were transferred via an oven dried syringe or cannula. All solvents were dried prior to use unless noted otherwise. Thin layer chromatography was performed using precoated silica gel plates (EMD Chemical Inc. 60, F254). Flash column chromatography was performed with silica gel (Silicycle, 40-63  $\mu\text{m}$ ). Infrared spectra (IR) were obtained on a Bruker Equinox 55 Spectrophotometer.  $^1\text{H}$  and  $^{13}\text{C}$  nuclear magnetic resonance spectra (NMR) were obtained on a



Bruker 400 MHz or Varian Unity-Inova 500 MHz recorded in ppm ( $\delta$ ) downfield of TMS ( $\delta = 0$ ) in  $\text{CDCl}_3$ ,  $\text{DMSO-}d_6$ , unless noted otherwise. Signal splitting patterns were described as singlet (s), doublet (d), triplet (t), quartet (q), quintet (quint), or multiplet (m), with coupling constants ( $J$ ) in hertz. High resolution mass spectra (HRMS) were performed by Analytical Instrument Center at the School of Pharmacy. The liquid chromatography mass spectrometry LC-MS analysis of final products was processed on Agilent 1290 Infinity II LC system using Poroshell 120 EC-C18 column (5 cm  $\times$  2.1 mm, 1.9  $\mu\text{m}$ ) for chromatographic separation. Agilent 6120 Quadrupole LC/MS with multimode Electrospray Ionization plus atmospheric pressure chemical ionization (MM-ES+APCI) was used for detection. The mobile phases were 5.0% methanol and 0.1% formic acid in purified water (A) and 0.1% formic acid in methanol (B). The gradient was held at 5% (0-0.2 min), increased to 100% at 2.5 min, then held at isocratic 100% B for 0.4 min and then immediately stepped back down to 5% for 0.1 min re-equilibration. The flow rate was set at 0.8 mL/min. Column temperature was set at 40  $^\circ\text{C}$ . The purities of all the final compounds were determined to be over 95% by LC-MS.

### **General procedure.**

#### ***Procedure A: General procedure for formation of $\beta$ -keto ester***

A solution of *N*-diisopropylamine (1.3 equiv) in tetrahydrofuran (THF) was cooled to  $-78$   $^\circ\text{C}$ . To the above solution was added *n*-BuLi (1.25 equiv) dropwise. The resulting solution was stirred for 45 min under argon. To the above reaction mixture was added a solution of ketone (1.0 equiv) in THF at  $-78$   $^\circ\text{C}$ . The reaction mixture was kept for 2 h at this temperature. Ethyl cyanofornate (1.3 eq) was added to the above solution. The resulting mixture was stirred at  $-78$   $^\circ\text{C}$  for 1 h. The reaction was allowed to warm to room temperature. After quenching with  $\text{NH}_4\text{Cl}$  solution, the mixture was diluted with ethyl acetate and washed with brine (50 mL  $\times$  2). The combined organic phase was dried over sodium sulfate and concentrated under vacuum. Flash column chromatography over silica gel afforded the  $\beta$ -keto ester.

#### ***Procedure B: General procedure for alkylation of $\beta$ -keto ester***

To a solution of  $\beta$ -keto ester (1.0 equiv) and hexamethylphosphoramide (HMPA) (2.0 equiv) in THF (10 mL/mmol) was added NaH (1.3 equiv) under argon. The reaction mixture was stirred for 1 h. Then alkyl iodide (5.0 equiv) was added. The mixture was stirred for 24 h. After quenching with  $\text{NH}_4\text{Cl}$  solution, the mixture was diluted with ethyl acetate and washed with  $\text{Na}_2\text{S}_2\text{O}_3$  and brine. The organic phase was dried over sodium sulfate and concentrated under vacuum to afford the crude product. Flash column chromatography over silica gel afforded the product.

#### ***Procedure C: General procedure of Beckmann rearrangement***

To a solution of ketone (1.0 equiv) in EtOH (10 mL/mmol) was added hydroxylamine hydrochloride (10.0 equiv) and KOAc (10.0 equiv). The reaction mixture was heated at reflux for 3 h. The mixture was cooled to room temperature. The volatile EtOH was removed under vacuum and the resulting residue was diluted with ethyl acetate and washed with brine (20 mL  $\times$  2). The organic phase was dried over sodium sulfate and concentrated under vacuum to afford crude product which was directly used in the next step without further purification.

To a solution of the above crude product in pyridine (5.0 mL/mmol) was added *p*-

toluenesulfonyl chloride (2.0 equiv) and dimethylaminopyridine (0.1 equiv). The resulting reaction mixture was heated at 60 °C overnight, cooled to room temperature, diluted with ethyl acetate (100 mL), and washed with 2 N HCl, NaHCO<sub>3</sub> and brine sequentially. The organic phase was dried over sodium sulfate and concentrated under vacuum. Flash column chromatography over silica gel afforded the lactam product.

***Procedure D: General procedure of removing TBS group***

To a solution of the TBS ether in THF/H<sub>2</sub>O (5:1) was added TsOH (0.1 equiv). The reaction mixture was stirred overnight. The mixture was diluted with EtOAc, and washed with brine (10 mL × 2). The organic phase was dried over sodium sulfate and concentrated under vacuum. Flash column chromatography over silica column afforded the alcohol.

***Procedure E: General procedure of removing TBS group***

A mixture of TBS ether and Pd/C (10%) in MeOH was hydrogenated at room temperature for 96 h under hydrogen atmosphere. The suspension was filtered through a pad of celite and the pad was washed with CH<sub>2</sub>Cl<sub>2</sub>. The combined filtrates were concentrated to dryness. Flash column chromatography over silica column afford of the alcohol.

***Procedure F: General procedure for formation of carbamates***

To a solution of alcohol (0.10 mol) in THF (2 mL) was added carbonyldiimidazole (32.4 mg, 0.20 mmol) and Et<sub>3</sub>N (20.2 mg, 0.20 mmol). The reaction mixture was stirred at room temperature overnight. The volatile dichloromethane was removed under vacuum and the residue was dissolved in toluene (4 mL), amine (0.50 mmol), Et<sub>3</sub>N (40.4 mg, 0.40 mmol) and dimethylaminopyridine (5.0 mg) were added to the reaction mixture. The reaction mixture was heated at 90 °C for 4 h. The mixture was cooled to room temperature then diluted with ethyl acetate (50 mL), and washed with brine (10 mL × 2). The organic phase was dried over sodium sulfate and concentrated under vacuum. Flash column chromatography over silica gel afforded the carbamates.

***Procedure G: General procedure for formation of carbamates***

To a solution of alcohol (0.10 mol) in dichloromethane (2 mL) was added *N, N*-dialkyl-1*H*-imidazole-1-carboxamide (0.20 mmol) and *t*-BuOK (22.4 mg, 0.20 mmol). The reaction mixture was stirred at room temperature overnight. The mixture was diluted with ethyl acetate (30 mL) and washed with brine (10 mL × 2). The organic phase was dried over sodium sulfate and concentrated under vacuum. Flash column chromatography over silica gel afforded the carbamates.

***Procedure H: General procedure for formation of imides***

To a solution of **8** (44.2 mg, 0.1 mol) in dichloromethane (0.5 mL) and toluene (3.0 mL) was added amine (0.5 mmol). The reaction mixture was stirred for 30 min and then heated at reflux for 2 h. The mixture was cooled to room temperature, and concentrated under vacuum. Flash column chromatography over silica gel afforded the imide. (Note, DMF was used as solvent for amino acids).

***Procedure I: General procedure for formation of imides***

A solution of **6a** (0.50 mmol) in aqueous NaOH (30%, 5 mL) and THF (5 mL) was stirred for 2 h at 50 °C. The reaction mixture was cooled to 0 °C and then NaBH<sub>4</sub> (76 mg, 2.00 mmol) was added

in one portion. The reaction mixture was allowed to warm to room temperature and stirred for 3 h. The reaction mixture was concentrated under vacuum, acidified by the slow addition of 1N HCl, extracted with EtOAc (3 × 30 mL). The combined organic extracts were washed with H<sub>2</sub>O (30 mL), brine (30 mL), and dried over Na<sub>2</sub>SO<sub>4</sub>. The organic phase was concentrated under vacuum and used for the next step.

To a solution of the above crude product in dichloromethane (0.5 mL) and toluene (3.0 mL) was added amine (0.5 mmol). The reaction mixture was stirred for 30 min then heated at reflux for 2 h. The mixture was cooled to room temperature, and concentrated under vacuum. Flash column chromatography over silica gel afforded the imide.

To a solution of the above imide in dichloromethane (5 mL) was added Dess-Martin periodinane (848 mg, 2.0 mmol). The reaction mixture was stirred at room temperature for 3 h. The mixture was diluted with ethyl acetate (30 mL) and washed with NaS<sub>2</sub>O<sub>3</sub> (10 mL) and brine (10 mL × 2). The organic phase was dried over sodium sulfate and concentrated under vacuum. Flash column chromatography over silica gel afforded the final imide product.

### A-ring expansion of dehydroepiandrosterone (DHEA) and cholesterol.

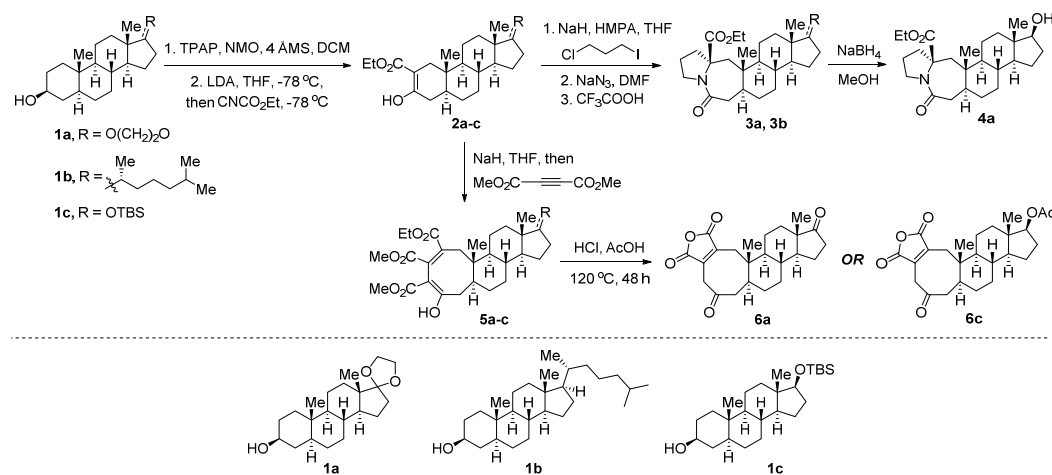

**Supplementary Figure 5. Synthesis of 3a, 3b, 4a, 5a-c, 6a and 6b.** The TBS ether **1c** was synthesized as reported<sup>1</sup>. **2a-c** were prepared following general procedure A. Alkylation of **2a** and **2b** was performed following general procedure B.

#### Syntheses of 2a-c.

Tetrapropylammonium perruthenate (526 mg, 1.5 mmol) was added to the solution of **1** (30.0 mmol), 4-methylmorpholine N-oxide (7.02 g, 30.0 mmol) and molecular sieves (1.5 g) in CH<sub>2</sub>Cl<sub>2</sub> (150 mL). After stirring at rt for 1 h, the suspension was filtered through a pad of celite and the pad was washed with CH<sub>2</sub>Cl<sub>2</sub>, concentrated under reduced pressure. Flash column chromatography over short silica column afford off white solid of **S1a-c**.

**S1a**, yield: 95%. Its spectral data obtained were identical to those reported in literature.<sup>2</sup>

**S1b**, yield: 90%. Its spectral data obtained were identical to those reported in literature.<sup>3</sup>

**S1c**, yield: 92%. Its spectral data obtained were identical with those reported in literature.<sup>1</sup>

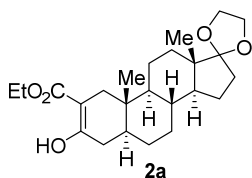

**2a**, yield: (74%). <sup>1</sup>H NMR (500 MHz, CDCl<sub>3</sub>) δ 12.17 (s, 1H), 4.28 – 4.06 (m, 2H), 3.98 – 3.79 (m, 4H), 2.30 (d, *J* = 15.7 Hz, 1H), 2.11 (ddd, *J* = 18.6, 5.5, 1.4 Hz, 1H), 2.05 – 1.91 (m, 2H), 1.87 – 1.50 (m, 5H), 1.52 – 1.13 (m, 12H), 0.96 – 0.67 (m, 8H). <sup>13</sup>C NMR (126 MHz, CDCl<sub>3</sub>) δ 172.9, 170.7, 119.4, 96.4, 65.1, 64.5, 60.3, 60.1, 53.4, 50.2, 45.8, 40.8, 36.8, 35.6, 34.7, 34.1, 33.3, 30.7, 30.6, 27.9, 22.6, 20.6, 14.6, 14.3, 11.5. IR:  $\bar{\nu}$  3402, 2932, 2855, 1652, 1039, 1207, 1094, 1053, 912, 835, 779, 712 cm<sup>-1</sup>. HRMS (ESI) *m/z*: anal. calculated for [C<sub>24</sub>H<sub>36</sub>O<sub>5</sub> + H]<sup>+</sup>: 405.2636, found: 405.2631.

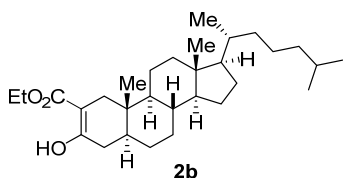

**2b**, yield: (75%). <sup>1</sup>H NMR (400 MHz, CDCl<sub>3</sub>) δ 12.19 (s, 1H), 4.43 – 4.06 (m, 2H), 2.31 (d, *J* = 15.7 Hz, 1H), 2.13 (ddd, *J* = 18.6, 5.4, 1.3 Hz, 1H), 2.07 – 1.95 (m, 2H), 1.90 – 1.74 (m, 2H), 1.69 (dd, *J* = 12.8, 3.0 Hz, 1H), 1.64 – 0.94 (m, 25H), 0.92 (d, *J* = 6.5 Hz, 3H), 0.88 (dd, *J* = 6.6, 1.8 Hz, 6H), 0.75 (s, 3H), 0.68 (s, 3H). <sup>13</sup>C NMR (101 MHz, CDCl<sub>3</sub>) δ 173.0, 170.8, 96.5, 60.2, 56.4, 56.3, 53.6, 42.5, 40.9, 40.0, 39.5, 36.8, 36.2, 35.8, 35.4, 34.7, 33.4, 31.5, 28.2, 28.1, 28.0, 24.2, 23.8, 22.8, 22.6, 21.2, 18.7, 14.3, 12.0, 11.6. IR:  $\bar{\nu}$  3398, 2868, 1738, 1654, 1466, 1309, 1265, 1205, 1053, 941, 705 cm<sup>-1</sup>. HRMS (ESI) *m/z*: anal. calculated for [C<sub>30</sub>H<sub>50</sub>O<sub>3</sub> + Na]<sup>+</sup>: 481.3652, found: 481.3649.

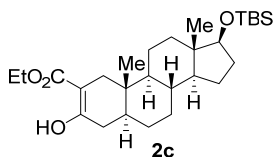

**2c**, yield: (80%). <sup>1</sup>H NMR (400 MHz, CDCl<sub>3</sub>) δ 12.18 (s, 1H), 4.31 – 4.09 (m, 2H), 3.56 (t, *J* = 8.3 Hz, 1H), 2.32 (d, *J* = 15.7 Hz, 1H), 2.13 (ddd, *J* = 18.5, 5.5, 1.2 Hz, 1H), 2.08 – 1.95 (m, 1H), 1.88 (dtd, *J* = 13.2, 9.3, 5.7 Hz, 1H), 1.82 – 1.65 (m, 3H), 1.65 – 1.18 (m, 12H), 1.13 – 0.96 (m, 2H), 0.95 – 0.78 (m, 11H), 0.76 (s, 3H), 0.72 (s, 3H), 0.02 (s, 3H), 0.01 (s, 3H). <sup>13</sup>C NMR (101 MHz, CDCl<sub>3</sub>) δ 173.0, 170.7, 96.5, 81.8, 60.2, 54.0, 50.6, 43.2, 41.0, 37.2, 36.9, 35.5, 34.8, 33.4, 31.1, 30.9, 28.0, 25.9, 23.5, 20.9, 18.2, 14.3, 11.6, 11.3, -4.5, -4.8. HRMS (ESI) *m/z*: anal. calculated for [C<sub>28</sub>H<sub>48</sub>O<sub>4</sub>Si + H]<sup>+</sup>: 477.3395, found: 477.3397.

**Syntheses of 3a, 3b and 4a.**

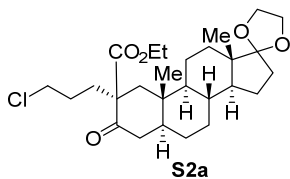

**S2a**, yield: (62%).  $^1\text{H NMR}$  (500 MHz,  $\text{CDCl}_3$ )  $\delta$  4.30 – 4.11 (m, 2H), 3.96 – 3.81 (m, 4H), 3.60 – 3.40 (m, 2H), 2.69 (t,  $J = 14.1$  Hz, 1H), 2.62 (d,  $J = 13.8$  Hz, 1H), 2.12 (dd,  $J = 14.1, 3.3$  Hz, 1H), 2.00 (dddd,  $J = 28.7, 14.5, 10.5, 3.7$  Hz, 2H), 1.79 (dt,  $J = 14.1, 9.3, 5.2$  Hz, 2H), 1.67 (dddd,  $J = 21.5, 15.0, 8.0, 3.8$  Hz, 4H), 1.60 – 1.17 (m, 15H), 0.93 (s, 3H), 0.84 (s, 3H), 0.75 – 0.65 (m, 1H).  $^{13}\text{C NMR}$  (126 MHz,  $\text{CDCl}_3$ )  $\delta$  208.3, 173.3, 119.4, 65.3, 64.6, 61.5, 58.1, 54.5, 50.1, 50.0, 48.5, 46.0, 45.3, 44.4, 36.9, 35.3, 34.5, 34.2, 30.9, 30.6, 28.3, 28.0, 22.7, 21.1, 14.5, 14.1, 12.7. **IR**:  $\bar{\nu}$  3408, 2939, 1709, 1445, 1307, 1118, 1035, 952, 856, 736  $\text{cm}^{-1}$ . **HRMS** (ESI)  $m/z$ : anal. calculated for  $[\text{C}_{27}\text{H}_{41}\text{ClO}_5 + \text{Na}]^+$ : 503.2535, found: 503.2537.

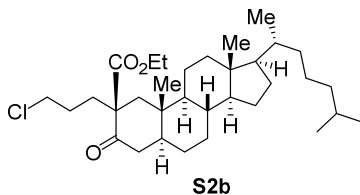

**S2b**, yield: (66%).  $^1\text{H NMR}$  (400 MHz,  $\text{CDCl}_3$ )  $\delta$  4.29 – 4.07 (m, 2H), 3.64 – 3.34 (m, 2H), 2.70 (t,  $J = 14.1$  Hz, 1H), 2.61 (d,  $J = 13.8$  Hz, 1H), 2.12 (dd,  $J = 14.1, 3.3$  Hz, 1H), 2.09 – 1.93 (m, 2H), 1.89 – 1.74 (m, 2H), 1.74 – 1.62 (m, 2H), 1.59 – 1.40 (m, 6H), 1.42 – 0.96 (m, 21H), 0.93 (s, 3H), 0.91 (d,  $J = 6.5$  Hz, 3H), 0.88 (d,  $J = 1.8$  Hz, 3H), 0.86 (d,  $J = 1.8$  Hz, 3H), 0.66 (s, 3H).  $^{13}\text{C NMR}$  (101 MHz,  $\text{CDCl}_3$ )  $\delta$  208.4, 173.2, 61.4, 58.1, 56.2, 56.2, 54.6, 49.9, 48.4, 45.2, 44.4, 42.6, 39.9, 39.5, 36.7, 36.1, 35.8, 34.9, 34.4, 31.6, 28.3, 28.2, 28.0, 27.9, 24.2, 23.8, 22.8, 22.5, 21.6, 18.6, 14.0, 12.6, 12.1. **IR**:  $\bar{\nu}$  3455, 2938, 2868, 1737, 1714, 1443, 1219, 1092, 1025, 736  $\text{cm}^{-1}$ . **HRMS** (ESI)  $m/z$ : anal. calculated for  $[\text{C}_{33}\text{H}_{55}\text{ClO}_3 + \text{Na}]^+$ : 557.3732, found: 557.3721.

To a solution of **S2** (1.8 mol) in DMF (10 mL) was added  $\text{NaN}_3$  (1.17 g, 18.0 mmol). The reaction mixture was heated at 80  $^\circ\text{C}$  for 3 h. The mixture was cooled to room temperature, diluted with diethyl ether (150 mL), and washed with brine (50 mL  $\times$  3). The organic phase was dried over sodium sulfate and concentrated under vacuum to afford a crude product which was directly used in the next step without further purification.

The above keto azide was dissolved in trifluoroacetic acid (10.0 mL) and the solution was stirred at room temperature. Gas evolution occurred immediately. After 1 h, the reaction mixture was evaporated under vacuum to remove trifluoroacetic acid and diluted with 100 mL of ethyl acetate, and the solution was washed with saturated aqueous  $\text{NaHCO}_3$  and brine (1  $\times$  25 mL). The organic layer was dried over sodium sulfate and evaporated in vacuum to give an oil. The crude product was purified by flash chromatography to give the lactam **3a** or **3b** as yellow oil.

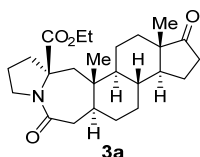

**3a**, yield: 84%.  $^1\text{H NMR}$  (500 MHz,  $\text{CDCl}_3$ )  $\delta$  4.26 (dq,  $J = 12.3, 7.1, 1.6$  Hz, 1H), 4.20 – 4.08 (m, 1H), 3.76 (ddd,  $J = 11.3, 8.4, 2.9$  Hz, 1H), 3.52 (ddd,  $J = 12.4, 9.5, 7.3$  Hz, 1H), 2.85 – 2.69 (m, 2H), 2.44 (dd,  $J = 19.1, 8.6$  Hz, 2H), 2.15 – 1.97 (m, 3H), 1.97 – 1.89 (m, 1H), 1.89 – 1.69 (m, 4H), 1.68 – 1.44 (m, 5H), 1.39 – 1.21 (m, 8H), 0.98 (qd,  $J = 12.7, 3.9$  Hz, 1H), 0.86 (s, 3H), 0.82 (s, 3H), 0.73 (td,  $J = 11.3, 10.9, 3.6$  Hz, 1H).  $^{13}\text{C NMR}$  (126 MHz,  $\text{CDCl}_3$ )  $\delta$  220.9, 174.4, 173.8, 67.8, 61.7, 55.0, 51.3, 50.5, 48.8, 47.4, 44.8, 42.8, 40.7, 39.7, 35.8, 33.9, 31.5, 30.6, 30.1, 21.7, 20.8, 20.7, 14.1, 13.8, 12.3. **IR**:  $\bar{\nu}$  3456, 3002, 1665, 1441, 1266, 1102, 1082, 1043, 914, 734  $\text{cm}^{-1}$ . **IR**:  $\bar{\nu}$  3451, 1736, 1631, 1439, 1365, 1266, 1227, 1205, 1123, 1048, 1024, 734  $\text{cm}^{-1}$ . **HRMS** (ESI)  $m/z$ : anal. calculated for  $[\text{C}_{25}\text{H}_{37}\text{NO}_4 + \text{H}]^+$ : 416.2795, found: 416.2815.

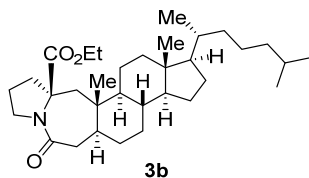

**3b**, yield: 78%.  $^1\text{H NMR}$  (400 MHz,  $\text{CDCl}_3$ )  $\delta$  4.25 (dq,  $J = 10.8, 7.1$  Hz, 1H), 4.13 (dq,  $J = 10.7, 7.1$  Hz, 1H), 3.75 (ddd,  $J = 11.7, 8.3, 3.1$  Hz, 1H), 3.51 (ddd,  $J = 11.8, 9.3, 7.1$  Hz, 1H), 2.83 – 2.64 (m, 2H), 2.44 (ddd,  $J = 12.8, 6.5, 3.0$  Hz, 1H), 2.15 – 1.93 (m, 3H), 1.78 (dt,  $J = 16.6, 6.8, 3.8$  Hz, 2H), 1.68 – 1.18 (m, 18H), 1.17 – 0.92 (m, 10H), 0.90 (d,  $J = 6.5$  Hz, 3H), 0.87 (d,  $J = 1.9$  Hz, 3H), 0.85 (d,  $J = 1.9$  Hz, 3H), 0.78 (s, 3H), 0.64 (s, 3H).  $^{13}\text{C NMR}$  (101 MHz,  $\text{CDCl}_3$ )  $\delta$  174.5, 173.9, 67.8, 61.6, 56.4, 56.2, 55.0, 50.6, 48.8, 44.8, 42.8, 42.2, 40.9, 40.0, 39.5, 39.4, 36.1, 35.7, 34.3, 31.8, 30.4, 28.2, 28.0, 24.1, 23.8, 22.8, 22.5, 21.4, 20.8, 18.6, 14.0, 12.3, 12.0. **IR**:  $\bar{\nu}$  3454, 2946, 2868, 1632, 1444, 1366, 1151, 1121, 1025, 735, 701  $\text{cm}^{-1}$ . **HRMS** (ESI)  $m/z$ : anal. calculated for  $[\text{C}_{33}\text{H}_{55}\text{NO}_3 + \text{H}]^+$ : 514.4255, found: 514.4256.

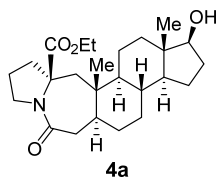

Ketone **3a** (498 mg, 1.2 mmol) was dissolved in MeOH (10 ml) and cooled to  $-78$  °C.  $\text{NaBH}_4$  (67.2 mg, 2.4 mmol) was then added, and the solution was stirred for 3 h at this temperature. The reaction mixture was quenched with  $\text{NH}_4\text{Cl}$  solution, the mixture was diluted with ethyl acetate (100 mL), and washed with brine (50 mL  $\times$  2). The organic phase was dried over sodium sulfate and concentrated in vacuum. Flash column chromatography over silica column afford of **4a** as a white solid. Yield: (470 mg, 94%).  $^1\text{H NMR}$  (500 MHz,  $\text{CDCl}_3$ )  $\delta$  4.25 (dq,  $J = 10.8, 7.1$  Hz, 1H), 4.13 (dq,  $J = 10.8, 7.1$  Hz, 1H), 3.74 (ddd,  $J = 11.5, 8.1, 3.1$  Hz, 1H), 3.62 (t,  $J = 8.6$  Hz, 1H), 3.51 (ddd,  $J = 11.8, 9.3, 7.2$  Hz, 1H), 2.87 – 2.65 (m, 2H), 2.44 (ddd,  $J = 12.8, 6.5, 3.0$  Hz, 1H), 2.13 – 1.92 (m, 3H), 1.89 – 1.37 (m, 10H), 1.37 – 1.20 (m, 7H), 1.05 (td,  $J = 12.9, 4.2$  Hz, 1H), 1.01 – 0.80 (m, 3H), 0.80 (s, 3H), 0.73 (s, 3H), 0.66 (ddd,  $J = 12.3, 10.2, 3.9$  Hz, 1H).  $^{13}\text{C NMR}$  (126 MHz,  $\text{CDCl}_3$ )  $\delta$  174.5, 173.9, 81.8, 67.8, 61.6, 55.1, 50.9, 50.6, 48.8, 44.8, 42.9, 42.7, 40.8, 39.6, 36.8, 34.3, 31.3, 30.5, 30.3, 23.3, 21.0, 20.8, 14.1, 12.3, 11.1. **IR**:  $\bar{\nu}$  3395, 3052, 1731, 1622, 1445, 1265, 1066, 855, 702  $\text{cm}^{-1}$ . **HRMS** (ESI)  $m/z$ : anal. calculated for  $[\text{C}_{25}\text{H}_{39}\text{NO}_4 + \text{H}]^+$ : 418.2952, found: 418.2960.

**Syntheses of 5a-c.**

To a solution of compound **2** (6.0 mol) in toluene (40 mL) was added NaH (288 mg, 7.2 mmol, 60%) under Ar. The reaction mixture was stirred for 2 h. Then DMAD (1.97 g, 12.0 mol) was added. The mixture was stirred for 30 mins. After quenching with NH<sub>4</sub>Cl solution, the mixture was diluted with ethyl acetate (150 mL), and washed with brine (50 mL × 2). The organic phase was dried over sodium sulfate and concentrated in vacuum. Flash column chromatography over silica column afforded **5** as yellow oil.

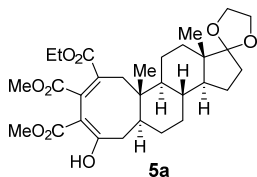

**5a**, yield: (62%). <sup>1</sup>H NMR (500 MHz, CDCl<sub>3</sub>) δ 12.96 (d, *J* = 2.1 Hz, 1H), 4.34 – 4.06 (m, 2H), 3.98 – 3.82 (m, 4H), 3.71 (s, 6H), 3.33 (d, *J* = 13.0 Hz, 1H), 2.67 – 2.53 (m, 1H), 1.97 (ddd, *J* = 14.5, 11.6, 3.1 Hz, 1H), 1.88 (d, *J* = 12.9 Hz, 1H), 1.85 – 1.67 (m, 3H), 1.67 – 1.57 (m, 2H), 1.57 – 1.33 (m, 6H), 1.33 – 1.15 (m, 7H), 0.83 (s, 3H), 0.79 – 0.64 (m, 4H). <sup>13</sup>C NMR (126 MHz, CDCl<sub>3</sub>) δ 180.2, 171.6, 170.1, 168.2, 138.4, 133.5, 119.1, 98.2, 65.1, 64.5, 61.3, 52.2, 52.1, 52.0, 50.5, 46.7, 45.9, 41.5, 37.8, 36.8, 35.7, 34.3, 31.3, 30.8, 22.6, 22.6, 21.4, 14.5, 13.9, 11.4. IR:  $\bar{\nu}$  3395, 2948, 1720, 1602, 1444, 1311, 1297, 1238, 1210, 1135, 1018, 950, 702, 673 cm<sup>-1</sup>. HRMS (ESI) *m/z*: anal. calculated for [C<sub>30</sub>H<sub>42</sub>O<sub>9</sub> + Na]<sup>+</sup>: 569.2721, found: 569.2707. LC-MS (*t*<sub>R</sub> = 3.61 min, λ = 254 nm, purity >99%).

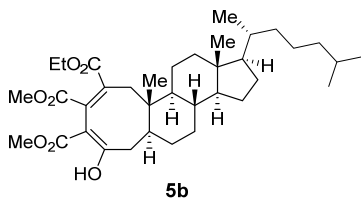

**5b**, yield: (74%). <sup>1</sup>H NMR (400 MHz, CDCl<sub>3</sub>) δ 12.95 (t, *J* = 1.6 Hz, 2H), 4.34 – 4.04 (m, 2H), 3.71 (d, *J* = 1.2 Hz, 6H), 3.32 (d, *J* = 12.9 Hz, 1H), 2.58 (ddd, *J* = 12.7, 9.1, 2.1 Hz, 1H), 2.08 – 1.93 (m, 1H), 1.85 (dd, *J* = 21.3, 10.7 Hz, 2H), 1.80 – 1.41 (m, 8H), 1.41 – 1.19 (m, 11H), 1.19 – 0.93 (m, 9H), 0.92 – 0.82 (m, 9H), 0.71 (d, *J* = 1.3 Hz, 3H), 0.65 (d, *J* = 1.3 Hz, 3H). <sup>13</sup>C NMR (101 MHz, CDCl<sub>3</sub>) δ 180.3, 171.7, 170.1, 168.3, 138.7, 133.4, 98.2, 61.3, 56.7, 56.1, 52.4, 52.2, 51.9, 46.8, 42.5, 41.5, 40.1, 39.5, 37.7, 36.8, 36.1, 35.7, 35.4, 32.1, 31.4, 28.3, 28.0, 24.1, 23.8, 22.8, 22.5, 21.9, 18.6, 13.9, 12.2, 11.4. IR:  $\bar{\nu}$  3433, 2936, 2867, 1654, 1600, 1358, 1296, 1235, 1214, 1173, 1018, 859, 675 cm<sup>-1</sup>. HRMS (ESI) *m/z*: anal. calculated for [C<sub>36</sub>H<sub>56</sub>O<sub>7</sub> + Na]<sup>+</sup>: 623.3918, found: 623.3904.

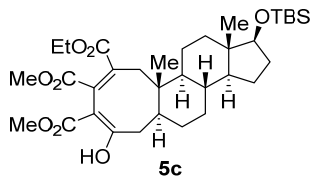

**5c**, yield: (68%). <sup>1</sup>H NMR (500 MHz, CDCl<sub>3</sub>) δ 12.96 (d, *J* = 2.0 Hz, 1H), 4.25 (dq, *J* = 10.9, 7.2 Hz, 1H), 4.17 (dq, *J* = 10.7, 7.0 Hz, 1H), 3.71 (s, 6H), 3.54 (t, *J* = 8.3 Hz, 1H), 3.33 (d, *J* = 12.9 Hz,

1H), 2.59 (ddd,  $J = 12.8, 9.2, 2.2$  Hz, 1H), 1.97 – 1.82 (m, 2H), 1.83 – 1.74 (m, 2H), 1.74 – 1.65 (m, 1H), 1.62 (d,  $J = 12.8$  Hz, 1H), 1.57 – 1.14 (m, 11H), 1.02 – 0.79 (m, 13H), 0.71 (s, 3H), 0.69 (s, 3H), 0.00 (d,  $J = 4.3$  Hz, 6H).  $^{13}\text{C}$  NMR (126 MHz,  $\text{CDCl}_3$ )  $\delta$  180.3, 171.7, 167.0, 168.3, 138.6, 133.5, 98.2, 81.6, 61.3, 52.7, 52.2, 52.0, 50.9, 46.9, 43.3, 41.5, 37.9, 37.3, 36.8, 35.5, 31.7, 31.3, 31.1, 25.8, 23.5, 21.6, 18.1, 13.9, 11.5, 11.4, -4.5, -4.8. **IR:**  $\bar{\nu}$  3371, 2953, 1722, 1654, 1312, 1212, 1173, 1020, 883, 797, 672  $\text{cm}^{-1}$ . **HRMS** (ESI)  $m/z$ : anal. calculated for  $[\text{C}_{34}\text{H}_{54}\text{O}_8\text{Si} + \text{Na}]^+$ : 641.3480, found: 641.3457. LC-MS ( $t_{\text{R}} = 1.16$  min,  $\lambda = 254$  nm, purity >99%).

### Syntheses of 6a and 6c.

**5a** or **5c** (4.0 mmol) was dissolved in AcOH (20 ml) and concentrated HCl (40 ml). The reaction mixture was heated at reflux for 48 h. The mixture was cooled to room temperature, diluted with ethyl acetate (200 mL), and washed with brine (50 mL  $\times$  2). The organic phase was dried over sodium sulfate and concentrated under vacuum. Flash column chromatography over silica column afforded **6a** or **6c**.

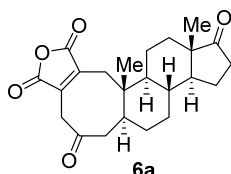

**6a**, yield: (60%).  $^1\text{H}$  NMR (500 MHz,  $\text{CDCl}_3$ )  $\delta$  3.72 (dd,  $J = 18.4, 1.5$  Hz, 1H), 3.39 (d,  $J = 18.3$  Hz, 1H), 2.87 – 2.75 (m, 1H), 2.75 – 2.68 (m, 1H), 2.42 (ddd,  $J = 19.3, 8.9, 1.1$  Hz, 1H), 2.26 (dd,  $J = 15.9, 2.2$  Hz, 1H), 2.19 (ddd,  $J = 12.6, 6.3, 2.5$  Hz, 2H), 2.04 (dt,  $J = 19.2, 9.0$  Hz, 2H), 1.99 – 1.76 (m, 4H), 1.62 – 1.42 (m, 4H), 1.42 – 1.30 (m, 2H), 1.23 (tdd,  $J = 18.7, 7.8, 4.1$  Hz, 3H), 0.98 (s, 3H), 0.85 (s, 3H), 0.67 (ddd,  $J = 12.1, 10.2, 3.6$  Hz, 1H).  $^{13}\text{C}$  NMR (126 MHz,  $\text{CDCl}_3$ )  $\delta$  220.1, 206.4, 165.0, 164.1, 141.5, 140.7, 51.2, 50.0, 49.1, 47.5, 42.6, 40.2, 35.7, 35.0, 31.2, 31.0, 30.2, 29.3, 21.5, 20.9, 15.1, 13.8. **IR:**  $\bar{\nu}$  2924, 2852, 1768, 1454, 1366, 1264, 1216, 1049, 939, 913, 736  $\text{cm}^{-1}$ . **HRMS** (ESI)  $m/z$ : anal. calculated for  $[\text{C}_{23}\text{H}_{28}\text{O}_5 + \text{H}]^+$ : 385.2010, found: 385.1999.

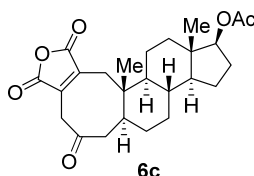

**6c**, yield: (64%).  $^1\text{H}$  NMR (500 MHz,  $\text{CDCl}_3$ )  $\delta$  4.53 (dd,  $J = 9.2, 7.8$  Hz, 1H), 3.71 (dd,  $J = 18.4, 1.5$  Hz, 1H), 3.37 (d,  $J = 18.3$  Hz, 1H), 2.79 (d,  $J = 14.6$  Hz, 1H), 2.71 (dd,  $J = 15.9, 12.4$  Hz, 1H), 2.24 (dd,  $J = 15.9, 2.2$  Hz, 1H), 2.20 – 2.04 (m, 3H), 2.01 (s, 3H), 1.95 – 1.84 (m, 1H), 1.76 (dt,  $J = 12.9, 3.4$  Hz, 1H), 1.68 (dq,  $J = 13.1, 3.5$  Hz, 1H), 1.57 (dddd,  $J = 12.3, 9.2, 6.7, 3.5$  Hz, 1H), 1.54 – 1.41 (m, 3H), 1.41 – 1.17 (m, 3H), 1.11 (td,  $J = 13.1, 3.9$  Hz, 1H), 1.05 – 0.84 (m, 5H), 0.77 (s, 3H), 0.62 (ddd,  $J = 12.0, 10.2, 3.6$  Hz, 1H).  $^{13}\text{C}$  NMR (126 MHz,  $\text{CDCl}_3$ )  $\delta$  206.7, 171.0, 165.0, 164.2, 141.6, 140.6, 82.4, 50.6, 49.9, 49.2, 42.6, 42.3 (two Carbon), 40.2, 36.5, 35.2, 31.0, 30.9, 29.4, 27.5, 23.3, 21.0, 21.0, 15.1, 12.1. **HRMS** (ESI)  $m/z$ : anal. calculated for  $\text{C}_{25}\text{H}_{32}\text{NaO}_6$   $[\text{M} + \text{H}]^+$ : 451.2091, found: 451.2099.

### D-ring expansion of isosteviol.



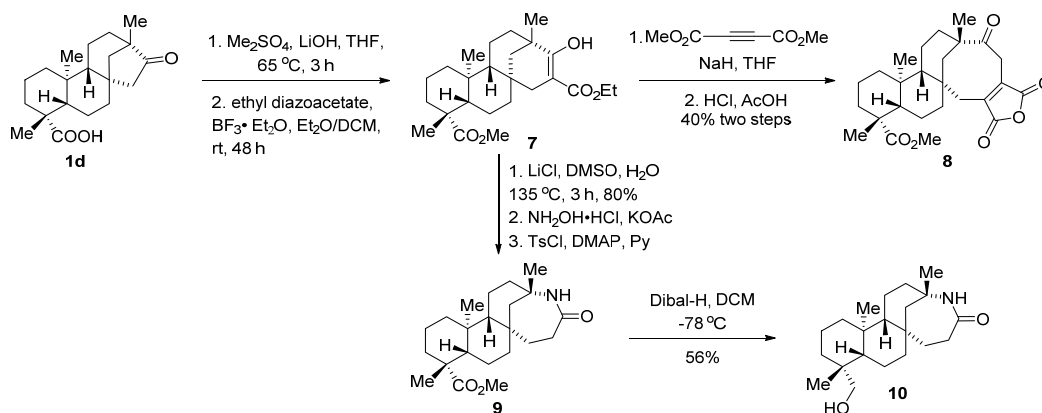

**Supplementary Figure 6. Syntheses of 8-10.** General procedure C was used for formation of 9.

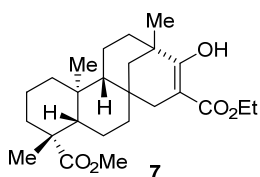

To a flame-dried 250 mL round-bottomed flask was added isosteviol **1d** (6.36 g, 20.0 mmol) and dry THF (100 mL). Upon dissolution, LiOH·H<sub>2</sub>O (1.26 g, 30 mmol) was added and the reaction was stirred for 1 h at room temperature under an atmosphere of Ar. Me<sub>2</sub>SO<sub>4</sub> (2.8 mL, 30.0 mmol) was slowly added, then a reflux condenser was fitted to the flask and the temperature was raised to 80 °C for 3 h. The mixture was cooled to room temperature, Et<sub>3</sub>N (5.0 mL) was added and the mixture was stirred for 30 min. The reaction mixture was diluted with 200 mL of ethyl acetate, and the solution was washed with brine (3 × 50 mL). The organic layer was dried over sodium sulfate and evaporated under vacuum to give a white solid **S3**. Yield: (6.57 g, 99%).

Ketone **S3** (332 mg, 1.0 mol) was dissolved in dry DCM/Et<sub>2</sub>O (1:1, 6.0 mL). BF<sub>3</sub>·Et<sub>2</sub>O (0.3 ml) and ethyl diazoethanoate (0.3 ml) was added. The reaction mixture was stirred for 48 h. The mixture was diluted with ethyl acetate (50 mL), and washed with NaHCO<sub>3</sub> (20 mL × 2) and brine (20 mL × 2). The organic phase was dried over sodium sulfate and concentrated under vacuum. Flash column chromatography over silica column afforded **7**. Yield: (264 mg, 63%). <sup>1</sup>H NMR (500 MHz, CDCl<sub>3</sub>) δ 12.31 (s, 1H), 4.22 (dddd, *J* = 17.9, 10.8, 7.1, 3.7 Hz, 2H), 3.66 (s, 3H), 2.86 (dd, *J* = 17.0, 1.9 Hz, 1H), 2.28 – 2.06 (m, 1H), 2.00 – 1.64 (m, 6H), 1.60 – 1.48 (m, 2H), 1.48 – 1.37 (m, 1H), 1.30 (t, *J* = 7.1 Hz, 3H), 1.27 – 1.22 (m, 3H), 1.18 (s, 3H), 1.13 – 0.96 (m, 7H), 0.85 (dd, *J* = 12.4, 3.9 Hz, 2H), 0.74 (s, 3H). <sup>13</sup>C NMR (126 MHz, CDCl<sub>3</sub>) δ 177.8, 175.9, 172.4, 97.5, 60.1, 58.3, 58.0, 51.2, 51.1, 45.5, 43.8, 40.0, 38.2, 37.9, 37.9, 37.1, 34.0, 32.0, 28.8, 23.8, 12.0, 19.7, 19.0, 14.4, 13.7. HRMS (ESI) *m/z*: anal. calculated for [C<sub>25</sub>H<sub>38</sub>O<sub>5</sub> + Na]<sup>+</sup>: 441.2611, found: 441.2602.

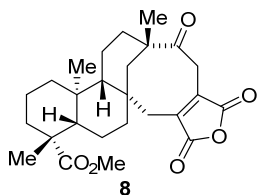

To a solution of compound **7** (4.18 g, 10.0 mol) in toluene (80 mL) was added NaH (480 mg, 12.0 mmol, 60%) under Ar. The reaction mixture was stirred for 2 h. Then DMAD (2.84 g, 2.0 mol) was added. The mixture was stirred for 20 min. After quenching with NH<sub>4</sub>Cl solution, the mixture was diluted with ethyl acetate (200 mL), and washed with brine (50 mL × 2). The organic phase was dried over sodium sulfate and concentrated under vacuum. Flash column chromatography over short silica column afforded a yellow oil, which was directly used in the next step.

The above product was dissolved in AcOH (30 ml) and concentrated HCl (30 ml). The reaction mixture was heated at reflux for 48 h. The mixture was cooled to room temperature, diluted with ethyl acetate (200 mL), and washed with brine (50 mL × 2). The organic phase was dried over sodium sulfate and concentrated in vacuum. Flash column chromatography over silica column afforded **8**. Yield: (1.77 g, 40% for two steps). <sup>1</sup>H NMR (500 MHz, CDCl<sub>3</sub>) δ 3.91 (dd, *J* = 18.6, 1.7 Hz, 1H), 3.61 (s, 3H), 3.17 (dd, *J* = 18.6, 1.5 Hz, 1H), 2.84 (d, *J* = 14.1 Hz, 1H), 2.44 (dq, *J* = 13.6, 3.1 Hz, 1H), 2.27 – 1.96 (m, 3H), 1.87 (dd, *J* = 14.8, 2.7 Hz, 1H), 1.83 – 1.74 (m, 2H), 1.70 (dd, *J* = 13.0, 3.3 Hz, 1H), 1.58 (ddt, *J* = 14.1, 5.2, 2.8 Hz, 1H), 1.37 (ddt, *J* = 28.6, 13.5, 2.2 Hz, 3H), 1.12 (s, 3H), 1.10 (s, 3H), 1.06 – 1.00 (m, 2H), 1.00 – 0.86 (m, 4H), 0.81 (td, *J* = 13.1, 4.3 Hz, 1H), 0.61 (s, 3H). <sup>13</sup>C NMR (126 MHz, CDCl<sub>3</sub>) δ 209.9, 177.3, 165.4, 164.1, 142.9, 140.6, 58.4, 56.9, 51.0, 49.2, 48.2, 43.6, 40.0, 39.9, 39.4, 37.9, 37.2, 37.0, 34.1, 28.8, 28.3, 23.5, 19.2, 18.8, 18.0, 13.8. IR:  $\bar{\nu}$  3374, 3054, 1816, 1723, 1398, 1346, 1272, 1191, 1170, 1094, 1035, 974, 894, 853, 738 cm<sup>-1</sup>. HRMS (ESI) *m/z*: anal. calculated for [C<sub>26</sub>H<sub>34</sub>O<sub>6</sub> + Na]<sup>+</sup>: 465.2248, found: 465.2231.

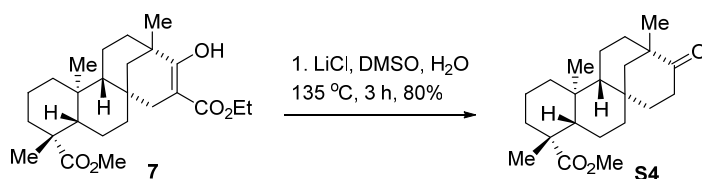

To a solution of **7** (585 mg, 1.4 mol) in DMSO (10 ml) was added LiCl (616 mg, 14 mmol). The reaction mixture was heated at reflux for 3 h. The mixture was cooled to room temperature, diluted with ethyl acetate (150 mL), and washed with brine (50 mL × 3). The organic phase was dried over sodium sulfate and concentrated in vacuum. Flash column chromatography over silica column afforded **S4**. Yield: (388 mg, 80%). <sup>1</sup>H NMR (500 MHz, CDCl<sub>3</sub>) δ 3.64 (s, 3H), 2.55 – 2.38 (m, 1H), 2.29 – 2.11 (m, 3H), 1.82 (td, *J* = 19.7, 10.9, 5.2 Hz, 5H), 1.75 – 1.69 (m, 1H), 1.65 – 1.50 (m, 3H), 1.44 (dtd, *J* = 14.1, 4.5, 2.2 Hz, 1H), 1.32 – 1.16 (m, 5H), 1.16 – 1.08 (m, 2H), 1.08 – 0.92 (m, 6H), 0.87 (td, *J* = 13.2, 4.4 Hz, 1H), 0.73 (s, 3H). <sup>13</sup>C NMR (126 MHz, CDCl<sub>3</sub>) δ 219.3, 177.8, 57.8, 57.6, 51.3, 51.2, 45.4, 44.3, 43.8, 39.8, 38.5, 38.2, 38.0, 37.9, 34.3, 29.4, 28.7, 24.7, 20.6, 20.0, 18.9, 13.3. IR:  $\bar{\nu}$  2986, 1738, 1447, 1373, 1240, 121, 1047, 940, 747 cm<sup>-1</sup>. HRMS (ESI) *m/z*: anal. calculated for [C<sub>22</sub>H<sub>34</sub>O<sub>3</sub> + H]<sup>+</sup>: 347.2581, found: 347.2573.

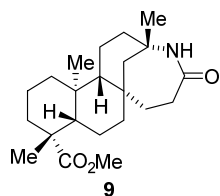

**9**, Yield: (78.0 mg, 60% for two steps). <sup>1</sup>H NMR (500 MHz, CDCl<sub>3</sub>) δ 5.20 (s, 1H), 3.64 (s, 3H),

2.55 (tt,  $J = 14.2, 2.2$  Hz, 1H), 2.43 – 2.26 (m, 1H), 2.16 (td,  $J = 14.7, 14.1, 3.3$  Hz, 2H), 2.04 – 1.70 (m, 5H), 1.70 – 1.49 (m, 5H), 1.49 – 1.40 (m, 1H), 1.33 (td,  $J = 12.6, 5.7$  Hz, 1H), 1.17 (s, 3H), 1.16 (s, 3H), 1.13 – 0.91 (m, 4H), 0.85 (ddd,  $J = 22.3, 11.6, 4.0$  Hz, 2H), 0.64 (s, 3H).  $^{13}\text{C}$  NMR (126 MHz,  $\text{CDCl}_3$ )  $\delta$  177.7, 175.9, 58.4, 57.2, 53.2, 51.2, 48.4, 43.8, 41.4, 41.4, 39.6, 38.1, 37.6, 35.3, 34.1, 32.5, 28.7, 28.3, 19.6, 18.9, 17.8, 13.8. **IR**:  $\bar{\nu}$  3055, 1736, 1640, 1422, 1265, 1046, 896  $\text{cm}^{-1}$ . **HRMS** (ESI)  $m/z$ : anal. calculated for  $[\text{C}_{22}\text{H}_{35}\text{NO}_3 + \text{H}]^+$ : 362.2690, found: 362.2686. LC-MS ( $t_{\text{R}} = 2.46$  min,  $\lambda = 210$  nm, purity >99%).

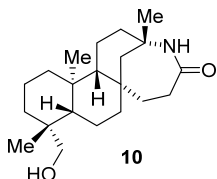

To a solution of lactam **9** (173 mg, 0.48 mol, 1.0 eq) in DCM (20 mL) was added DIBAL-H (1.0 ml, 1.0 mmol, 1 M) at  $-78$  °C under Ar. The reaction mixture was stirred for 30 min at this temperature. After quenching with 2 N HCl, the mixture was diluted with ethyl acetate (100 mL), and washed with brine (20 mL  $\times$  2). The organic phase was dried over sodium sulfate and concentrated in vacuum. Flash column chromatography over silica column afforded **10**. Yield: (89.5 mg, 56%).  $^1\text{H}$  NMR (500 MHz,  $\text{CDCl}_3$ )  $\delta$  5.65 (s, 1H), 3.72 (d,  $J = 10.8$  Hz, 1H), 3.45 (d,  $J = 10.8$  Hz, 1H), 2.89 (dd,  $J = 18.3, 2.4$  Hz, 1H), 1.89 (d,  $J = 18.4$  Hz, 1H), 1.84 – 1.70 (m, 3H), 1.70 – 1.20 (m, 15H), 1.18 (s, 3H), 1.04 – 0.95 (m, 4H), 0.95 – 0.88 (m, 4H), 0.84 (td,  $J = 13.1, 4.0$  Hz, 1H).  $^{13}\text{C}$  NMR (126 MHz,  $\text{CDCl}_3$ )  $\delta$  173.7, 65.2, 57.7, 57.6, 51.8, 49.4, 44.6, 40.2, 39.8, 39.8, 38.6, 37.4, 35.6, 35.4, 28.9, 26.9, 18.6, 18.5, 18.0, 16.5. **IR**:  $\bar{\nu}$  3193, 2979, 2844, 1645, 1403, 1222, 1034, 953, 737  $\text{cm}^{-1}$ . **HRMS** (ESI)  $m/z$ : anal. calculated for  $[\text{C}_{21}\text{H}_{35}\text{NO}_2 + \text{H}]^+$ : 334.2741, found: 334.2729.

### D-ring expansion of dehydroepiandrosterone (DHEA) and estrone.

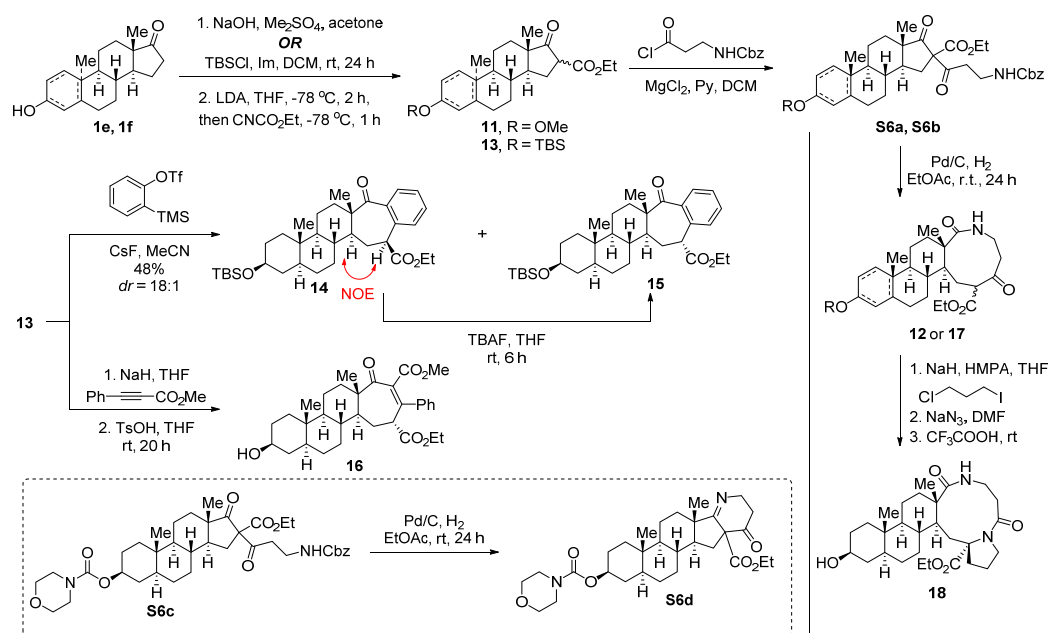

Supplementary Figure 7. Syntheses of medium ring scaffold **14-18**. **11** and **13** were prepared as

general procedure A. Alkylation of **17** was performed as procedure B. The relative stereochemistry of **14** was confirmed by NOE experiment. The ring expansion failed to work when changing the TBS group of **S6b** to carbamate.

### Syntheses of **12**, **17** and **18**.

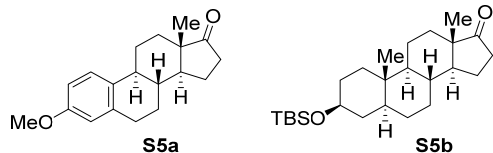

**S5a**<sup>4</sup> and **S5b**<sup>5</sup> were synthesized as reported by literature.

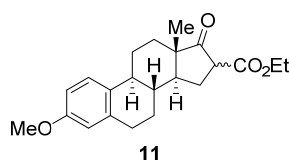

**11**, yield: (80%). <sup>1</sup>H NMR (500 MHz, CDCl<sub>3</sub>) δ 7.20 (d, *J* = 8.6 Hz, 1H), 6.72 (dd, *J* = 8.5, 2.7 Hz, 1H), 6.65 (d, *J* = 2.8 Hz, 1H), 4.21 (q, *J* = 7.1 Hz, 2H), 3.78 (s, 3H), 3.19 (dd, *J* = 9.9, 8.4 Hz, 1H), 2.91 (dd, *J* = 10.3, 6.2 Hz, 2H), 2.34 (dddd, *J* = 38.5, 22.8, 9.5, 3.7 Hz, 3H), 2.17 – 1.91 (m, 3H), 1.71 – 1.39 (m, 5H), 1.29 (t, *J* = 7.1 Hz, 3H), 0.99 (s, 3H). <sup>13</sup>C NMR (126 MHz, CDCl<sub>3</sub>) δ 212.2, 169.4, 157.6, 137.6, 131.7, 126.3, 113.8, 111.6, 61.4, 55.2, 54.3, 48.9, 48.0, 44.0, 37.9, 31.9, 29.6, 26.5, 26.4, 25.8, 14.2, 13.2. IR:  $\bar{\nu}$  3453, 2938, 1749, 1609, 1454, 1367, 1324, 1265, 1217, 1149, 1037, 900, 862, 785, 703 cm<sup>-1</sup>. HRMS (ESI) *m/z*: anal. calculated for [C<sub>22</sub>H<sub>28</sub>O<sub>4</sub> + Na]<sup>+</sup>: 379.1880, found: 379.1872.

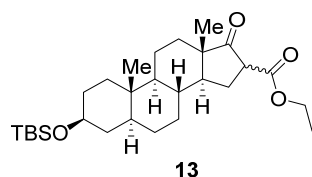

**13**, yield: (88%). <sup>1</sup>H NMR (400 MHz, CDCl<sub>3</sub>) δ 4.18 (q, *J* = 7.1 Hz, 2H), 3.68 – 3.34 (m, 1H), 3.10 (dd, *J* = 10.0, 8.4 Hz, 1H), 2.37 – 2.07 (m, 1H), 1.95 (td, *J* = 12.8, 10.0 Hz, 1H), 1.89 – 1.75 (m, 2H), 1.75 – 1.53 (m, 5H), 1.53 – 1.16 (m, 13H), 1.16 – 1.04 (m, 1H), 1.02 – 0.79 (m, 18H), 0.77 – 0.61 (m, 1H), 0.04 (s, 6H). <sup>13</sup>C NMR (101 MHz, CDCl<sub>3</sub>) δ 212.5, 169.5, 71.9, 61.3, 54.5, 54.3, 49.0, 48.7, 45.0, 38.5, 37.1, 35.7, 34.7, 32.0, 31.8, 30.9, 28.4, 26.6, 25.9, 20.4, 18.2, 14.1, 13.2, 12.3, -4.6. IR:  $\bar{\nu}$  3397, 2857, 1751, 1641, 1449, 1324, 1265, 1144, 1092, 1006, 868, 834, 736, 672 cm<sup>-1</sup>. HRMS (ESI) *m/z*: anal. calculated for [C<sub>28</sub>H<sub>48</sub>O<sub>4</sub>Si + Na]<sup>+</sup>: 499.3214, found: 499.3195.

A mixture of **11** or **13** (5.28 mmol), MgCl<sub>2</sub> (1.03 g, 10.56 mmol) and pyridine (3.8 mL, 47.2 mmol) in DCM (30.0 mL) under an argon atmosphere was stirred at rt for 30 mins. Next, a solution of acid chloride (10.56 mmol) in DCM (15.0 mL) was added dropwise over 2 h and the resulting mixture was stirred for another two hours at rt. The mixture was then diluted with DCM (30 mL) and washed with 10% aq. HCl (30 mL). The aqueous layer was then extracted with DCM (2 × 30 mL) and the combined organic extracts dried over sodium sulfate and concentrated in vacuum. Flash

column chromatography over silica column afforded **S6** as yellow oil.

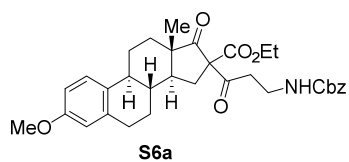

**S6a**, yield: (79%).  $^1\text{H NMR}$  (500 MHz,  $\text{CDCl}_3$ )  $\delta$  7.31 (dd,  $J = 20.9, 4.4$  Hz, 5H), 7.15 (d,  $J = 8.6$  Hz, 1H), 6.70 (dd,  $J = 8.6, 2.7$  Hz, 1H), 6.63 (d,  $J = 2.8$  Hz, 1H), 5.22 (t,  $J = 6.2$  Hz, 1H), 5.07 (s, 2H), 4.20 (q,  $J = 6.9$  Hz, 2H), 3.76 (s, 3H), 3.44 (q,  $J = 6.4$  Hz, 2H), 3.03 (dt,  $J = 18.4, 5.7$  Hz, 1H), 2.97 – 2.79 (m, 4H), 2.34 (dd,  $J = 12.6, 4.6$  Hz, 1H), 2.21 (td,  $J = 10.9, 4.0$  Hz, 1H), 2.13 – 1.80 (m, 3H), 1.69 – 1.37 (m, 5H), 1.25 (t,  $J = 7.1$  Hz, 3H), 1.00 (s, 3H).  $^{13}\text{C NMR}$  (126 MHz,  $\text{CDCl}_3$ )  $\delta$  208.2, 199.8, 167.9, 157.5, 156.1, 137.4, 136.4, 131.5, 128.3, 127.9, 127.9, 126.1, 113.7, 111.5, 74.0, 66.5, 62.3, 55.0, 49.8, 47.2, 43.5, 40.1, 37.8, 35.9, 32.1, 30.5, 29.3, 26.3, 25.6, 14.2, 13.8. **IR**:  $\bar{\nu}$  3410, 1720, 1656, 1501, 1454, 1265, 1238, 1148, 1009, 736, 702  $\text{cm}^{-1}$ . **HRMS** (ESI)  $m/z$ : anal. calculated for  $[\text{C}_{33}\text{H}_{39}\text{NO}_7 + \text{Na}]^+$ : 584.2619, found: 584.2609.

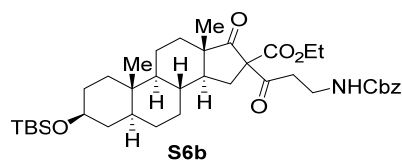

**S6b**, yield: (92%).  $^1\text{H NMR}$  (500 MHz,  $\text{CDCl}_3$ )  $\delta$  7.52 – 7.04 (m, 5H), 5.11 (d,  $J = 27.6$  Hz, 3H), 4.20 (qd,  $J = 7.5, 4.4$  Hz, 2H), 3.54 (tt,  $J = 10.3, 4.6$  Hz, 1H), 3.44 (d,  $J = 7.3$  Hz, 2H), 3.06 – 2.80 (m, 2H), 2.74 (dd,  $J = 13.0, 5.6$  Hz, 1H), 1.93 (t,  $J = 13.1$  Hz, 1H), 1.80 (ddd,  $J = 13.0, 10.1, 2.6$  Hz, 2H), 1.75 – 1.59 (m, 3H), 1.59 – 1.13 (m, 13H), 1.15 – 1.01 (m, 2H), 0.96 (s, 3H), 0.89 (s, 9H), 0.81 (s, 3H), 0.68 (ddd,  $J = 14.8, 10.9, 4.1$  Hz, 1H), 0.06 (s, 6H).  $^{13}\text{C NMR}$  (101 MHz,  $\text{CDCl}_3$ )  $\delta$  208.6, 200.1, 168.1, 156.1, 136.5, 128.4, 128.0, 74.0, 71.8, 66.5, 62.3, 54.2, 49.6, 48.2, 44.8, 40.1, 38.5, 37.0, 35.9, 35.6, 34.6, 32.2, 31.8, 30.9, 30.6, 28.2, 25.9, 20.3, 18.2, 14.2, 13.8, 12.2, -4.6. **IR**:  $\bar{\nu}$  3443, 2857, 1723, 1516, 1453, 1229, 1142, 863, 834, 775  $\text{cm}^{-1}$ . **HRMS** (ESI)  $m/z$ : anal. calculated for  $[\text{C}_{39}\text{H}_{59}\text{NO}_7\text{Si} + \text{Na}]^+$ : 704.3953, found: 704.3943.

A mixture of compound **S6** (3.82 mmol) and Pd/C (0.30 g, 10%) in EtOAc (50 mL) was hydrogenated at rt for 24 h under hydrogen atmosphere. The suspension was filtered through a pad of celite and the pad was washed with  $\text{CH}_2\text{Cl}_2$ . The combined filtrates were concentrated to dryness. Flash column chromatography over silica column afforded **12** or **17** as a colorless oil.

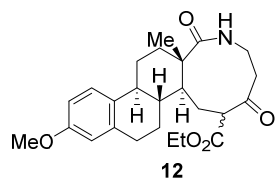

**12**, yield: (90%).  $^1\text{H NMR}$  (500 MHz,  $\text{CDCl}_3$ )  $\delta$  7.16 (d,  $J = 8.7$  Hz, 1H), 6.72 (dd,  $J = 8.7, 2.7$  Hz, 1H), 6.63 (d,  $J = 2.8$  Hz, 1H), 5.67 (dd,  $J = 8.9, 4.8$  Hz, 1H), 4.39 – 4.02 (m, 2H), 3.91 (ddd,  $J = 13.8, 8.9, 5.3$  Hz, 1H), 3.78 (s, 3H), 3.54 (td,  $J = 13.2, 5.3$  Hz, 1H), 3.44 – 3.23 (m, 2H), 2.87 (q,  $J$

= 6.1, 5.1 Hz, 2H), 2.47 – 2.25 (m, 2H), 2.18 – 1.85 (m, 3H), 1.79 (dt,  $J = 13.1, 3.2$  Hz, 1H), 1.67 – 1.29 (m, 5H), 1.25 (t,  $J = 7.2$  Hz, 3H), 1.12 (s, 3H), 1.03 (dd,  $J = 10.5, 5.2$  Hz, 1H).  $^{13}\text{C NMR}$  (126 MHz,  $\text{CDCl}_3$ )  $\delta$  209.8, 180.5, 168.6, 157.7, 137.3, 131.3, 126.2, 113.6, 111.9, 63.9, 61.6, 55.2, 48.7, 48.4, 43.5, 41.0, 38.8, 35.8, 34.0, 29.9, 27.4, 26.8, 25.7, 14.2, 14.1. **IR**:  $\bar{\nu}$  2990, 1666, 1502, 1442, 1366, 1266, 1228, 1216, 857, 743  $\text{cm}^{-1}$ . **HRMS** (ESI)  $m/z$ : anal. calculated for  $[\text{C}_{25}\text{H}_{33}\text{NO}_5 + \text{H}]^+$ : 428.2432, found: 428.2427. LC-MS ( $t_{\text{R}}$  (major) = 2.52 min,  $t_{\text{R}}$  (minor) = 2.63 min,  $\lambda = 254$  nm, purity 97%).

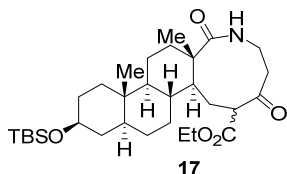

**17**, yield: (95%).  $^1\text{H NMR}$  (400 MHz,  $\text{CDCl}_3$ )  $\delta$  4.35 – 3.97 (m, 3H), 3.97 – 3.75 (m, 1H), 3.53 (tt,  $J = 10.5, 4.8$  Hz, 1H), 2.79 (dd,  $J = 12.9, 6.4$  Hz, 1H), 2.61 (ddd,  $J = 19.1, 5.6, 1.1$  Hz, 1H), 2.22 (ddd,  $J = 19.1, 10.1, 7.1$  Hz, 1H), 1.97 – 1.81 (m, 2H), 1.79 – 1.59 (m, 4H), 1.59 – 1.15 (m, 14H), 1.06 (s, 3H), 0.85 (d,  $J = 22.7$  Hz, 15H), 0.68 – 0.57 (m, 1H), 0.04 (s, 6H).  $^{13}\text{C NMR}$  (101 MHz,  $\text{CDCl}_3$ )  $\delta$  202.3, 180.5, 167.0, 71.9, 66.2, 62.4, 54.4, 51.0, 46.9, 46.3, 44.9, 38.5, 37.1, 35.6, 34.7, 34.3, 33.6, 31.8, 31.1, 30.4, 28.4, 25.9, 20.6, 18.2, 14.5, 14.0, 12.3, -4.6. **HRMS** (ESI)  $m/z$ : anal. calculated for  $[\text{C}_{31}\text{H}_{53}\text{NO}_5\text{Si} + \text{H}]^+$ : 548.3766, found: 548.3750.

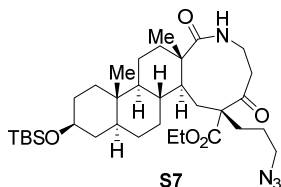

To a solution of compound **17** (1.09 g, 2.0 mol) and HMPA (716 mg 4.0 mmol) in THF (20 mL) was added NaH (104 mg, 2.6 mmol, 60%) under Ar. The reaction mixture was stirred for 1 h. Then 1-Chloro-3-iodopropane (2.08 g, 10.0 mol) was added. The mixture was stirred for 24 h. After quenching with  $\text{NH}_4\text{Cl}$  solution, the mixture was diluted with ethyl acetate (60 mL), and washed with  $\text{Na}_2\text{S}_2\text{O}_3$  (20 mL) and brine (20 mL  $\times$  2). The organic phase was dried over sodium sulfate and concentrated in vacuum to afford crude product which was directly used in the next step without further purification.

To a solution of the above product in DMF (10 mL) was added  $\text{NaN}_3$  (1.17 g, 18.0 mmol). The reaction mixture was heated at 80  $^\circ\text{C}$  for 3 h. The mixture was cooled to room temperature, diluted with diethyl ether (150 mL), and washed with brine (50 mL  $\times$  3), and the combined organic extracts was dried over sodium sulfate and concentrated in vacuum. Flash column chromatography over silica column afforded **S7** as a yellow oil. Yield: (756 mg, 60% for two steps).  $^1\text{H NMR}$  (500 MHz,  $\text{CDCl}_3$ )  $\delta$  5.57 (dd,  $J = 8.6, 5.0$  Hz, 1H), 4.22 (dq,  $J = 10.9, 7.2$  Hz, 1H), 4.18 – 4.03 (m, 2H), 3.73 (ddd,  $J = 13.4, 8.5, 5.0$  Hz, 1H), 3.55 (tt,  $J = 10.4, 4.7$  Hz, 1H), 3.47 (ddd,  $J = 15.3, 11.9, 5.2$  Hz, 1H), 3.25 (dddd,  $J = 21.7, 18.9, 11.0, 5.7$  Hz, 3H), 2.18 (dd,  $J = 15.3, 4.3$  Hz, 1H), 2.11 – 1.98 (m, 1H), 1.95 – 1.74 (m, 3H), 1.74 – 1.57 (m, 4H), 1.57 – 1.15 (m, 15H), 1.15 – 1.04 (m, 4H), 1.00 – 0.84 (m, 10H), 0.84 – 0.72 (m, 4H), 0.05 (s, 6H).  $^{13}\text{C NMR}$  (126 MHz,  $\text{CDCl}_3$ )  $\delta$  210.5, 180.5, 171.9, 71.8, 65.1, 61.4, 53.5, 51.5, 49.0, 46.8, 44.6, 38.6, 38.3, 38.0, 37.0, 36.9, 36.2, 34.4, 33.1,

31.8, 31.8, 31.4, 28.7, 25.9, 25.0, 20.0, 18.2, 14.3, 14.1, 12.4, -4.6. **HRMS** (ESI) *m/z*: anal. calculated for  $[C_{34}H_{58}N_4O_5Si + Na]^+$ : 653.4069, found: 653.4061.

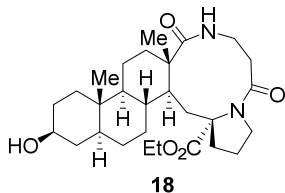

The keto azide **S7** (126 mg, 0.20 mmol) was dissolved in 5.0 mL of trifluoroacetic acid and the solution was stirred for 5 days. The reaction mixture was diluted with 30 mL of ethyl acetate, and the solution was washed with saturated aqueous  $NaHCO_3$  and brine ( $1 \times 25$  mL). The organic layer was dried over sodium sulfate and evaporated under vacuum to give an oil. The crude product was purified by flash chromatography to give lactam **18** as a yellow oil. Yield: (33.2 mg, 34%).  **$^1H$  NMR** (500 MHz,  $CDCl_3$ )  $\delta$  5.88 (dd,  $J = 11.1, 2.3$  Hz, 1H), 4.91 (tt,  $J = 11.5, 5.2$  Hz, 1H), 4.38 (ddt,  $J = 13.7, 11.1, 9.1$  Hz, 1H), 4.15 (dddd,  $J = 17.8, 10.7, 7.1, 3.7$  Hz, 2H), 3.98 (td,  $J = 9.3, 8.3, 2.9$  Hz, 1H), 3.50 (td,  $J = 9.5, 6.5$  Hz, 1H), 3.00 (ddt,  $J = 13.7, 9.8, 1.9$  Hz, 1H), 2.79 (ddd,  $J = 12.8, 9.0, 1.6$  Hz, 1H), 2.64 (dd,  $J = 13.7, 3.3$  Hz, 1H), 2.42 (dt,  $J = 12.8, 9.5$  Hz, 1H), 2.20 – 2.00 (m, 3H), 1.91 (qt,  $J = 7.6, 4.1$  Hz, 2H), 1.84 – 1.41 (m, 12H), 1.33 – 1.17 (m, 8H), 1.10 (s, 3H), 1.09 – 0.99 (m, 1H), 0.93 – 0.84 (m, 1H), 0.83 (s, 3H).  **$^{13}C$  NMR** (126 MHz,  $CDCl_3$ )  $\delta$  178.5, 172.9, 170.1, 78.5, 68.6, 60.6, 53.1, 49.9, 46.3, 44.7, 44.2, 41.1, 38.2, 37.8, 36.6, 36.4, 36.3, 35.9, 33.2, 32.2, 31.3, 28.9, 26.8, 23.9, 20.1, 15.2, 14.1, 12.1. **IR**:  $\bar{\nu}$  3427, 3055, 2855, 2099, 1738, 1664, 1366, 1265, 1134, 1019, 868, 703  $cm^{-1}$ . **HRMS** (ESI) *m/z*: anal. calculated for  $[C_{28}H_{44}N_2O_5 + H]^+$ : 489.3323, found: 489.3310.

#### General protocol for syntheses of 14-16.

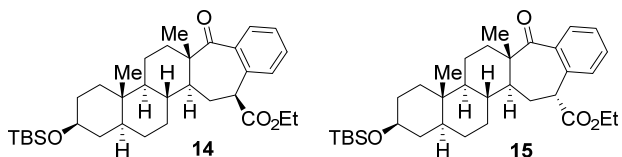

To a solution of **13** (514 mg, 1.08 mol,) in dry MeCN (10 mL) was added 2-(trimethylsilyl) phenyl trifluoromethanesulfonate (644 mg, 2.16 mmol) and CsF (328 mg, 2.16 mmol) under Ar. The reaction mixture was heated at 80 °C for 3 h. The mixture was cooled to room temperature, diluted with ethyl acetate (50 mL), and washed with brine (20 mL  $\times$  2). The organic phase was dried over sodium sulfate and concentrated in vacuum. Flash column chromatography over silica column afforded **14** as white solid; Yield: (286 mg, 48%) and **15** as yellow oil. Yield: (16.1 mg, 2.7%). **14** can be converted to **15** by 1M TBAF in THF at room temperature for 6 h.  **$^1H$  NMR** (400 MHz,  $CDCl_3$ )  $\delta$  7.55 – 7.28 (m, 3H), 7.14 (dd,  $J = 7.6, 1.2$  Hz, 1H), 4.17 – 3.94 (m, 2H), 3.87 (dd,  $J = 9.2, 4.6$  Hz, 1H), 3.51 (td,  $J = 10.7, 5.4$  Hz, 1H), 2.37 (ddd,  $J = 14.7, 9.2, 3.3$  Hz, 1H), 2.03 (qd,  $J = 10.8, 10.4, 4.0$  Hz, 2H), 1.76 – 1.53 (m, 5H), 1.53 – 1.08 (m, 16H), 1.04 – 0.81 (m, 11H), 0.78 (s, 3H), 0.68 – 0.55 (m, 1H), 0.04 (s, 6H).  **$^{13}C$  NMR** (101 MHz,  $CDCl_3$ )  $\delta$  213.8, 173.5, 140.2, 134.3, 130.5, 129.1, 128.0, 127.6, 71.9, 61.30, 53.4, 50.7, 49.5, 46.0, 44.2, 38.4, 37.6, 36.9, 35.6, 35.5, 31.7, 30.9, 28.6, 28.1, 25.9, 20.3, 18.2, 14.9, 13.9, 12.2, -4.6. **IR**:  $\bar{\nu}$  2944, 2865, 1447, 1366, 967, 902, 807, 836,

739  $\text{cm}^{-1}$ . **HRMS** (ESI)  $m/z$ : anal. calculated for  $[\text{C}_{34}\text{H}_{52}\text{O}_4\text{Si} + \text{H}]^+$ : 553.3708, found: 553.3686. **15**,  **$^1\text{H NMR}$**  (500 MHz,  $\text{CDCl}_3$ )  $\delta$  7.39 (td,  $J = 7.6, 1.5$  Hz, 1H), 7.30 (td,  $J = 7.4, 1.2$  Hz, 1H), 7.28 – 7.18 (m, 1H), 7.09 (d,  $J = 7.6$  Hz, 1H), 4.39 – 4.12 (m, 2H), 3.69 (dd,  $J = 12.6, 5.9$  Hz, 1H), 3.47 (tt,  $J = 10.9, 4.7$  Hz, 1H), 2.32 (td,  $J = 13.3, 5.4$  Hz, 1H), 1.94 (dq,  $J = 12.9, 3.5$  Hz, 1H), 1.72 (dd,  $J = 9.3, 3.0$  Hz, 1H), 1.68 – 1.51 (m, 4H), 1.50 – 1.11 (m, 13H), 0.99 – 0.76 (m, 12H), 0.76 – 0.66 (m, 5H), 0.55 (td,  $J = 11.3, 3.5$  Hz, 1H), 0.01 (s, 6H).  **$^{13}\text{C NMR}$**  (126 MHz,  $\text{CDCl}_3$ )  $\delta$  215.6, 172.7, 139.9, 134.3, 130.9, 127.3, 126.0, 124.3, 71.9, 61.0, 53.0, 49.0, 45.7, 44.1, 43.8, 38.3, 37.9, 36.9, 36.6, 35.5, 31.7, 31.3, 30.7, 28.5, 25.9, 20.5, 18.2, 14.1, 14.0, 12.2, -4.6. **HRMS** (ESI)  $m/z$ : anal. calculated for  $[\text{C}_{34}\text{H}_{52}\text{O}_4\text{Si} + \text{Na}]^+$ : 575.3527, found: 575.3505.

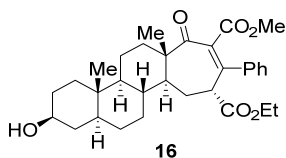

To a solution of compound **13** (143 mg, 0.3 mol.) in dry THF (10 mL) was added NaH (15.6 mg, 0.39 mmol, 60%) under Ar. The reaction mixture was stirred for 2 h. Then methyl phenylpropargylate (96 mg, 0.6 mol) was added. The mixture was heated at reflux for 24 h. The mixture was cooled to room temperature and 2 N HCl (2.0 ml) was added. The reaction mixture was heated at reflux for another 2 h. The mixture was cooled to room temperature, diluted with ethyl acetate (50 mL), and washed with  $\text{NaHCO}_3$  (20 mL  $\times$  2) and brine (20 mL  $\times$  2). The organic phase was dried over sodium sulfate and concentrated in vacuum. Flash column chromatography over silica column afforded **16** as yellow oil; Yield: (76.2 mg, 46% for two steps).  **$^1\text{H NMR}$**  (500 MHz,  $\text{CDCl}_3$ )  $\delta$  7.40 (q,  $J = 5.2, 4.8$  Hz, 3H), 7.26 – 7.09 (m, 2H), 3.94 – 3.84 (m, 1H), 3.84 – 3.73 (m, 1H), 3.68 (dq,  $J = 10.9, 5.2$  Hz, 1H), 3.64 – 3.49 (m, 4H), 2.52 (td,  $J = 14.2, 13.4, 5.4$  Hz, 1H), 2.29 – 2.14 (m, 1H), 2.03 – 1.60 (m, 10H), 1.60 – 1.17 (m, 11H), 1.13 – 0.95 (m, 5H), 0.89 – 0.86 (m, 4H).  **$^{13}\text{C NMR}$**  (126 MHz,  $\text{CDCl}_3$ )  $\delta$  210.6, 170.6, 163.8, 148.4, 136.5, 131.8, 128.3, 127.8, 127.8, 126.9, 71.1, 60.9, 53.2, 52.0, 49.3, 47.9, 44.4, 44.1, 37.9, 36.8, 36.7, 36.2, 35.6, 31.3, 30.9, 28.4, 27.9, 20.5, 13.7, 13.6, 12.2. **IR**:  $\bar{\nu}$  3456, 3016, 2944, 1435, 1229, 1046, 898, 737, 702  $\text{cm}^{-1}$ . **HRMS** (ESI)  $m/z$ : anal. calculated for  $[\text{C}_{32}\text{H}_{42}\text{O}_6 + \text{H}]^+$ : 523.3054, found: 523.3042.

**C-H oxidation/ring expansion of dehydroepiandrosterone, cholesterol, isosteviol, estrone and Diosgenin.**

**Syntheses of 14-16.**



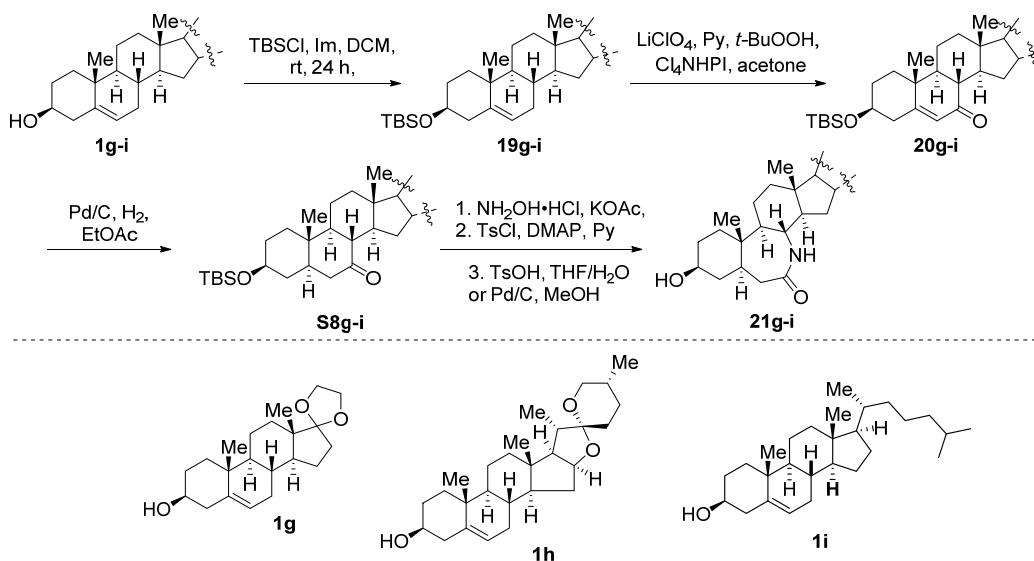

**Supplementary Figure 8. Electrochemical allylic oxidation/ring expansion of natural products.**  $19g$ ,<sup>6</sup>  $19h$ <sup>7</sup> were synthesized as procedure reported by literature. The electrochemical allylic oxidation was performed by following procedures reported by Baran's group<sup>8</sup> using IKA ElectraSyn 2.0. General procedure C was used for Backman rearrangement of  $S8$ . TBS group of  $21g$  and  $21i$  was removed following procedure D, while TBS group of  $21h$  was removed following procedure E.

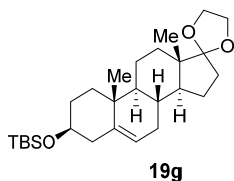

**19g**,  $^1\text{H NMR}$  (500 MHz,  $\text{CDCl}_3$ )  $\delta$  5.32 (dt,  $J = 5.4, 2.0$  Hz, 1H), 4.07 – 3.68 (m, 4H), 3.49 (tt,  $J = 10.9, 4.7$  Hz, 2H), 2.36 – 2.22 (m, 1H), 2.17 (ddd,  $J = 13.3, 5.0, 2.3$  Hz, 1H), 2.07 – 1.90 (m, 2H), 1.87 – 1.76 (m, 2H), 1.76 – 1.64 (m, 2H), 1.64 – 1.33 (m, 7H), 1.26 (qd,  $J = 11.9, 6.3$  Hz, 1H), 1.13 – 0.93 (m, 5H), 0.90 (s, 9H), 0.87 (s, 3H), 0.06 (s, 6H).  $^{13}\text{C NMR}$  (126 MHz,  $\text{CDCl}_3$ )  $\delta$  141.5, 120.9, 119.5, 72.5, 65.2, 64.5, 50.63, 50.0, 45.7, 42.8, 37.4, 36.6, 34.2, 32.2, 32.1, 31.3, 30.6, 25.9, 22.8, 20.5, 19.4, 18.2, 14.2, -4.6. **HRMS** (ESI)  $m/z$ : anal. calculated for  $\text{C}_{27}\text{H}_{46}\text{O}_3$   $[\text{M} + \text{Na}]^+$ : 469.3108, found: 469.3118.

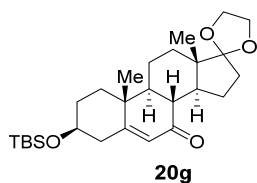

**20g**, yield: 0.5 mmol scale, 68%, 2.5 mmol scale, 49%.  $^1\text{H NMR}$  (500 MHz,  $\text{CDCl}_3$ )  $\delta$  5.65 (d,  $J = 1.7$  Hz, 1H), 4.01 – 3.78 (m, 4H), 3.68 – 3.52 (m, 1H), 2.53 – 2.32 (m, 3H), 2.30 – 2.16 (m, 1H), 2.00 – 1.87 (m, 2H), 1.87 – 1.70 (m, 3H), 1.69 – 1.34 (m, 8H), 1.18 (s, 3H), 0.88 (s, 9H), 0.85 (s, 3H), 0.05 (s, 6H).  $^{13}\text{C NMR}$  (126 MHz,  $\text{CDCl}_3$ )  $\delta$  201.6, 166.0, 125.7, 118.6, 71.2, 65.1, 64.4, 49.9, 46.1, 45.3, 44.3, 42.5, 38.3, 36.4, 34.1, 31.7, 29.6, 25.8, 25.0, 20.6, 18.1, 17.3, 14.4, -4.7, -4.7.

**HRMS** (ESI)  $m/z$ : anal. calculated for  $[C_{27}H_{44}O_4Si + H]^+$ : 461.3082, found: 461.3069.

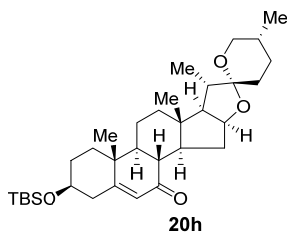

**20h**, yield: 0.5 mmol scale, 58%.  $^1H$  NMR (500 MHz,  $CDCl_3$ )  $\delta$  5.75 – 5.52 (m, 1H), 4.48 (td,  $J = 8.0, 5.4$  Hz, 1H), 3.60 (tt,  $J = 10.5, 4.8$  Hz, 1H), 3.47 (ddd,  $J = 11.0, 4.5, 2.0$  Hz, 1H), 3.40 (t,  $J = 10.9$  Hz, 1H), 2.94 – 2.65 (m, 1H), 2.41 (dtd,  $J = 13.7, 10.8, 5.3$  Hz, 3H), 1.96 – 1.78 (m, 3H), 1.77 – 1.35 (m, 13H), 1.21 (s, 3H), 1.15 (dt,  $J = 17.7, 5.2$  Hz, 2H), 0.98 (d,  $J = 7.0$  Hz, 3H), 0.89 (s, 9H), 0.80 (d,  $J = 7.0$  Hz, 6H), 0.07 (s, 6H).  $^{13}C$  NMR (126 MHz,  $CDCl_3$ )  $\delta$  201.7, 166.0, 125.6, 109.2, 80.9, 71.2, 66.8, 61.1, 49.8, 49.5, 44.8, 42.6, 41.5, 40.9, 38.7, 38.5, 36.4, 33.7, 31.7, 31.4, 30.3, 28.8, 25.8, 20.9, 18.1, 17.3, 17.1, 16.4, 14.6, -4.7, -4.7. **IR**:  $\bar{\nu}$  3354, 1675, 1377, 1174, 1077, 981, 899, 851, 836, 773, 663  $cm^{-1}$ . **HRMS** (ESI)  $m/z$ : anal. calculated for  $[C_{33}H_{54}O_4Si + H]^+$ : 543.3864, found: 543.3844.

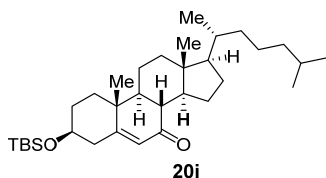

**20i**, yield: 0.5 mmol scale, 70%.  $^1H$  NMR (500 MHz,  $CDCl_3$ )  $\delta$  5.78 – 5.50 (m, 1H), 3.60 (tt,  $J = 10.5, 4.8$  Hz, 1H), 2.39 (qdd,  $J = 14.0, 6.0, 2.0$  Hz, 3H), 2.23 (dd,  $J = 12.5, 10.7$  Hz, 1H), 2.03 (dt,  $J = 12.8, 3.5$  Hz, 1H), 1.90 (dtt,  $J = 12.7, 7.1, 3.2$  Hz, 2H), 1.82 (dq,  $J = 13.2, 3.7$  Hz, 1H), 1.69 – 1.44 (m, 5H), 1.44 – 0.97 (m, 16H), 0.92 (d,  $J = 6.5$  Hz, 3H), 0.91 – 0.88 (m, 9H), 0.87 (d,  $J = 2.4$  Hz, 3H), 0.86 (d,  $J = 2.4$  Hz, 3H), 0.68 (s, 3H), 0.06 (d,  $J = 0.8$  Hz, 6H).  $^{13}C$  NMR (126 MHz,  $CDCl_3$ )  $\delta$  202.4, 165.8, 125.8, 71.3, 54.8, 50.0, 49.92, 45.4, 43.0, 42.5, 39.4, 38.7, 38.3, 36.4, 36.2, 35.7, 31.7, 28.5, 28.0, 26.3, 25.8, 23.8, 22.8, 22.5, 21.2, 18.8, 18.1, 17.3, 11.9, -4.7, -4.7. **IR**:  $\bar{\nu}$  2977, 1739, 1422, 1365, 1265, 1228, 1216, 705  $cm^{-1}$ . **HRMS** (ESI)  $m/z$ : anal. calculated for  $[C_{33}H_{58}O_2Si + Na]^+$ : 537.4098, found: 537.4089.

A mixture of compound **20** (6.0 mmol) and Pd/C (100 mg, 10%) in EtOAc (100 mL) was hydrogenated at room temperature for 16 h under hydrogen atmosphere. The suspension was filtered through a pad of celite and the pad was washed with  $CH_2Cl_2$ . The combined filtrates were concentrated to dryness. Recrystallization of the crude reaction mixture with EtOAc give product **S8**.

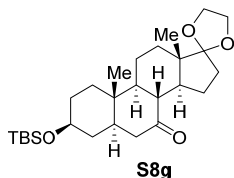

**S8g**, yield: 90%.  $^1H$  NMR (500 MHz,  $CDCl_3$ )  $\delta$  4.02 – 3.69 (m, 4H), 3.53 (tt,  $J = 9.7, 4.6$  Hz, 1H),

2.42 – 2.20 (m, 3H), 2.11 – 1.95 (m, 1H), 1.97 – 1.68 (m, 5H), 1.63 (dt,  $J = 12.3, 3.6$  Hz, 1H), 1.55 – 1.34 (m, 7H), 1.23 – 1.04 (m, 5H), 0.97 (td,  $J = 13.2, 3.8$  Hz, 1H), 0.86 (s, 9H), 0.82 (s, 3H), 0.03 (d,  $J = 1.0$  Hz, 6H).  $^{13}\text{C}$  NMR (126 MHz,  $\text{CDCl}_3$ )  $\delta$  211.3, 118.6, 71.4, 65.1, 64.4, 55.2, 50.0, 46.6, 46.0, 45.6, 43.3, 38.4, 36.3, 35.9, 34.0, 31.5, 29.7, 25.8, 23.7, 21.3, 18.1, 14.4, 11.8, -4.7. IR:  $\bar{\nu}$  3359, 1703, 1641, 1265, 1091, 948, 872, 835, 774, 735, 703  $\text{cm}^{-1}$ . HRMS (ESI)  $m/z$ : anal. calculated for  $[\text{C}_{27}\text{H}_{46}\text{O}_4\text{Si} + \text{H}]^+$ : 463.3238, found: 463.3224.

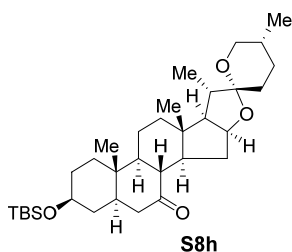

**S8h**, yield: 84%.  $^1\text{H}$  NMR (500 MHz,  $\text{CDCl}_3$ )  $\delta$  4.47 (td,  $J = 7.9, 6.2$  Hz, 1H), 3.54 (tt,  $J = 10.4, 4.7$  Hz, 1H), 3.46 (dt,  $J = 10.9, 3.2$  Hz, 1H), 3.38 (t,  $J = 10.9$  Hz, 1H), 2.58 (ddd,  $J = 12.8, 7.7, 5.5$  Hz, 1H), 2.50 (t,  $J = 11.3$  Hz, 1H), 2.43 – 2.26 (m, 1H), 2.01 (dd,  $J = 12.5, 2.3$  Hz, 1H), 1.83 (p,  $J = 6.9$  Hz, 1H), 1.79 – 1.34 (m, 16H), 1.21 – 1.02 (m, 6H), 1.02 – 0.92 (m, 4H), 0.87 (d,  $J = 1.1$  Hz, 9H), 0.79 (d,  $J = 6.3$  Hz, 3H), 0.75 (s, 3H), 0.04 (s, 6H).  $^{13}\text{C}$  NMR (126 MHz,  $\text{CDCl}_3$ )  $\delta$  211.5, 109.2, 80.8, 71.4, 66.8, 61.3, 55.3, 49.3, 48.5, 46.9, 46.0, 41.2, 40.4, 38.8, 38.4, 36.2, 36.1, 32.3, 31.5, 31.4, 30.3, 28.8, 25.8, 21.6, 18.2, 17.2, 16.5, 14.6, 11.9, -4.7. IR:  $\bar{\nu}$  2950, 1435, 1266, 1216, 1092, 1057, 981, 837  $\text{cm}^{-1}$ . HRMS (ESI)  $m/z$ : anal. calculated for  $[\text{C}_{33}\text{H}_{56}\text{O}_4\text{Si} + \text{H}]^+$ : 545.4021, found: 545.4006.

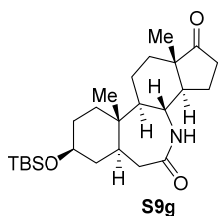

**S9g**, yield: 68%,  $^1\text{H}$  NMR (500 MHz,  $\text{CDCl}_3$ )  $\delta$  5.22 (s, 1H), 3.99 – 3.72 (m, 4H), 3.59 – 3.37 (m, 1H), 3.31 (ddd,  $J = 11.1, 9.0, 3.9$  Hz, 1H), 2.65 (dd,  $J = 14.4, 10.1$  Hz, 1H), 2.14 – 1.92 (m, 1H), 1.96 – 1.69 (m, 5H), 1.70 – 1.16 (m, 10H), 1.10 (ddd,  $J = 12.0, 9.2, 5.9$  Hz, 1H), 1.07 – 0.97 (m, 1H), 0.97 (s, 3H), 0.85 (s, 9H), 0.83 (s, 3H), 0.02 (s, 6H).  $^{13}\text{C}$  NMR (126 MHz,  $\text{CDCl}_3$ )  $\delta$  177.5, 118.4, 70.9, 65.3, 64.5, 53.7, 52.3, 48.5, 45.6, 41.6, 41.2, 39.3, 39.3, 37.7, 33.6, 31.2, 29.4, 25.8, 23.4, 21.6, 18.1, 13.9, 12.8, -4.7, -4.7. IR:  $\bar{\nu}$  3225, 1447, 1337, 1228, 1051, 1007, 952, 875, 800, 775  $\text{cm}^{-1}$ . HRMS (ESI)  $m/z$ : anal. calculated for  $[\text{C}_{27}\text{H}_{47}\text{NO}_4\text{Si} + \text{Na}]^+$ : 500.3167, found: 500.3148.

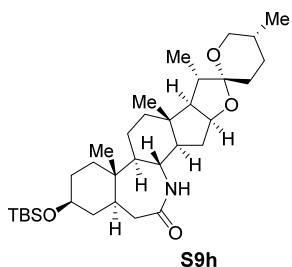

**S9h**, yield: 54%.  $^1\text{H NMR}$  (500 MHz,  $\text{CDCl}_3$ )  $\delta$  5.75 (d,  $J = 3.6$  Hz, 1H), 4.38 (q,  $J = 7.3$  Hz, 1H), 3.59 – 3.39 (m, 3H), 3.35 (t,  $J = 11.0$  Hz, 1H), 2.69 (dd,  $J = 14.3, 10.3$  Hz, 1H), 2.13 (ddd,  $J = 11.2, 7.7, 4.3$  Hz, 1H), 2.00 – 1.52 (m, 11H), 1.50 – 1.25 (m, 9H), 1.20 – 1.06 (m, 2H), 0.99 (s, 3H), 0.95 (d,  $J = 6.4$  Hz, 3H), 0.86 (s, 9H), 0.78 (d,  $J = 6.3$  Hz, 3H), 0.76 (s, 3H), 0.02 (s, 6H).  $^{13}\text{C NMR}$  (126 MHz,  $\text{CDCl}_3$ )  $\delta$  177.7, 109.2, 79.6, 70.9, 66.8, 61.8, 54.0, 53.5, 51.1, 41.7, 41.7, 41.2, 40.0, 39.4, 39.3, 38.8, 37.5, 32.4, 31.3, 31.2, 30.2, 28.7, 25.8, 22.1, 18.1, 17.0, 15.9, 14.4, 12.7, -4.6, -4.7. **IR**:  $\bar{\nu}$  3455, 3016, 1664, 1435, 1365, 1092, 981, 736  $\text{cm}^{-1}$ . **HRMS** (ESI)  $m/z$ : anal. calculated for  $[\text{C}_{33}\text{H}_{57}\text{NO}_4\text{Si} + \text{Na}]^+$ : 582.3949, found: 582.3933.

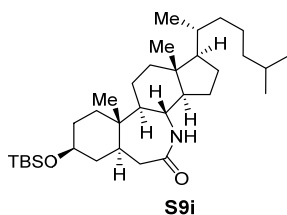

**S9i**, yield: 52%.  $^1\text{H NMR}$  (500 MHz,  $\text{CDCl}_3$ )  $\delta$  3.45 (ddd,  $J = 11.0, 6.3, 4.7$  Hz, 1H), 3.25 (ddd,  $J = 10.7, 9.1, 4.1$  Hz, 1H), 2.63 (dd,  $J = 14.3, 10.2$  Hz, 1H), 1.95 – 1.77 (m, 3H), 1.77 – 1.54 (m, 8H), 1.54 – 0.89 (m, 21H), 0.86 (d,  $J = 6.5$  Hz, 3H), 0.82 (d,  $J = 1.8$  Hz, 11H), 0.81 (d,  $J = 2.6$  Hz, 3H), 0.63 (s, 3H), -0.02 (s, 6H).  $^{13}\text{C NMR}$  (126 MHz,  $\text{CDCl}_3$ )  $\delta$  177.6, 70.9, 55.7, 54.2, 53.4, 52.0, 42.2, 41.5, 41.0, 39.3, 39.2, 39.1, 38.6, 37.6, 35.8, 35.4, 31.2, 27.8, 27.6, 25.8, 24.9, 23.6, 22.7, 22.4, 22.1, 18.4, 18.0, 12.7, 11.4, -4.7, -4.8. **IR**:  $\bar{\nu}$  3407, 2859, 1660, 1264, 1095, 1056, 1006, 874, 853, 799  $\text{cm}^{-1}$ . **HRMS** (ESI)  $m/z$ : anal. calculated for  $[\text{C}_{33}\text{H}_{61}\text{NO}_2\text{Si} + \text{Na}]^+$ : 554.4364, found: 554.4379.

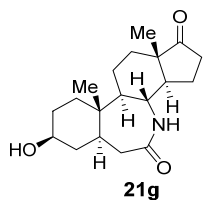

**21g**, yield: 60%.  $^1\text{H NMR}$  (500 MHz,  $\text{CDCl}_3$ )  $\delta$  6.41 (s, 1H), 5.40 (dd,  $J = 5.1, 2.5$  Hz, 1H), 3.54 (ddt,  $J = 16.0, 10.8, 4.7$  Hz, 1H), 2.72 – 2.45 (m, 3H), 2.35 (ddd,  $J = 13.2, 5.0, 2.4$  Hz, 1H), 2.31 – 2.09 (m, 5H), 2.11 – 1.84 (m, 5H), 1.69 (td,  $J = 12.1, 11.1, 6.3$  Hz, 2H), 1.66 – 1.38 (m, 4H), 1.33 (s, 3H), 1.15 (td,  $J = 13.7, 3.6$  Hz, 1H), 0.99 (s, 3H).  $^{13}\text{C NMR}$  (126 MHz,  $\text{CDCl}_3$ )  $\delta$  213.8, 175.0, 139.8, 120.4, 71.1, 61.5, 53.1, 46.8, 41.9, 37.7, 37.5, 36.5, 34.8, 32.1, 31.4, 31.0, 22.5, 18.5, 16.7. **IR**:  $\bar{\nu}$  3455, 2970, 1657, 1441, 1366, 1216, 1079, 1025, 897, 735  $\text{cm}^{-1}$ . **HRMS** (ESI)  $m/z$ : anal. calculated for  $\text{C}_{19}\text{H}_{30}\text{NO}_3$   $[\text{M} + \text{H}]^+$ : 320.2200, found: 320.2209. LC-MS ( $t_{\text{R}} = 1.08$  min,  $\lambda = 210$  nm, purity >99%).

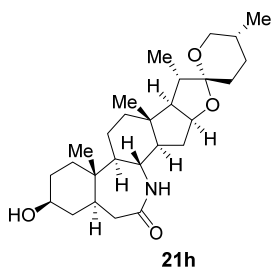

**21h**, yellow solid. Yield: (860 mg, 84%).  $^1\text{H NMR}$  (500 MHz,  $\text{CDCl}_3$ )  $\delta$  5.31 (d,  $J = 6.4$  Hz, 1H), 4.40 (q,  $J = 7.3$  Hz, 1H), 3.58 (tt,  $J = 10.9, 4.7$  Hz, 1H), 3.55 – 3.43 (m, 1H), 3.37 (t,  $J = 10.9$  Hz, 1H), 2.72 (dd,  $J = 14.3, 10.6$  Hz, 1H), 2.15 (ddd,  $J = 12.4, 7.5, 5.2$  Hz, 1H), 1.98 – 1.73 (m, 7H), 1.65 (dddd,  $J = 35.2, 20.2, 10.3, 3.5$  Hz, 4H), 1.54 – 1.22 (m, 9H), 1.21 – 1.00 (m, 7H), 0.97 (d,  $J = 6.5$  Hz, 3H), 0.80 (d,  $J = 6.3$  Hz, 3H), 0.78 (s, 3H).  $^{13}\text{C NMR}$  (126 MHz,  $\text{CDCl}_3$ )  $\delta$  177.3, 109.3, 79.6, 70.1, 66.9, 61.9, 54.2, 53.6, 51.1, 41.7, 41.5, 40.7, 40.1, 39.4, 39.3, 38.8, 37.4, 32.4, 31.3, 30.7, 30.2, 28.7, 22.1, 17.1, 16.0, 14.4, 12.7. **IR**:  $\bar{\nu}$  3016, 1649, 1267, 1092, 1060, 980, 896, 737  $\text{cm}^{-1}$ . **HRMS** (ESI)  $m/z$ : anal. calculated for  $[\text{C}_{27}\text{H}_{43}\text{NO}_4 + \text{H}]^+$ : 446.3265, found: 446.3262.

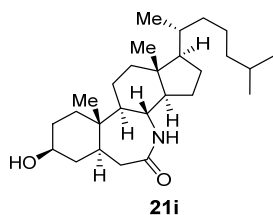

**21i**, white solid, yield: (86%).  $^1\text{H NMR}$  ( $\text{CDCl}_3$ , 500 MHz)  $\delta$  5.33 (s, 1H), 3.60-3.54 (m, 1H), 3.31 (td,  $J = 9.8, 3.4$  Hz, 1H), 2.69 (dd,  $J = 14.2, 10.9$  Hz, 1H), 1.97-1.87 (m, 4H), 1.83-1.76 (m, 5H), 1.71-1.65 (m, 1H), 1.54-1.43 (m, 3H), 1.39-1.31 (m, 5H), 1.17-1.03 (m, 11H), 0.99 (s, 3H), 0.91 (d,  $J = 6.5$  Hz, 3H), 0.87 (d,  $J = 2.5$  Hz, 3H), 0.86 (d,  $J = 2.5$  Hz, 3H), 0.69 (s, 3H).  $^{13}\text{C NMR}$  ( $\text{CDCl}_3$ , 125 MHz)  $\delta$  177.7, 70.2, 56.0, 54.6, 53.6, 52.2, 42.5, 41.6, 40.8, 39.5, 39.3, 38.8, 37.6, 36.0, 35.6, 30.8, 28.1, 27.8, 25.2, 23.8, 22.9, 22.6, 22.3, 18.6, 12.9, 11.7. **HRMS** (ESI):  $m/z$ : calculated for  $\text{C}_{27}\text{H}_{48}\text{NO}_2$ :  $[\text{M} + \text{H}]^+$  418.3680, found: 418.3687.

#### Procedure for synthesis of **24**.

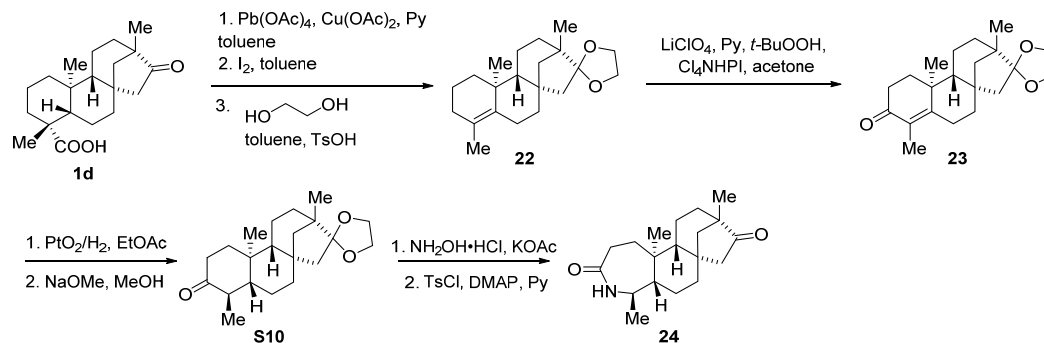

**Supplementary Figure 9. Syntheses of 24.** The relative stereochemistry of **S10** was confirmed by X-ray crystallography. The electrochemical allylic oxidation was performed following procedures reported by Baran's group<sup>8</sup> using IKA ElectraSyn 2.0. General procedure C was used for Backman rearrangement of **S10**.

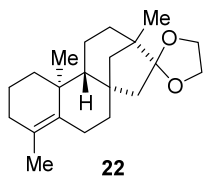

To a solution of **1d** (1.40 g, 4.44 mmol) in toluene (25 mL) were added lead (IV) acetate (2.56 g, 5.78 mmol), cooper(II) acetate (44 mg, 0.22 mmol), and pyridine (1.36 g, 16.9 mmol), and the

reaction mixture was stirred at 90 °C for 15 min. Then it was diluted with ether (80 mL) and washed with 2 N HCl (3 × 20 mL), water (10 mL), sat. aq NaHCO<sub>3</sub> (2 × 10 mL), and brine, and the organic phase was dried over sodium sulfate. Removal of the solvent under vacuum afforded a crude product which was used in the next step without purification. To a stirred solution of this crude product in dry toluene (30 mL) was added iodine (16.6 mg, 0.05 mmol), and the reaction mixture was stirred at 90 °C for 3 h. Then it was diluted with EtOAc (80 mL) and washed with Na<sub>2</sub>S<sub>2</sub>O<sub>3</sub> (20 mL) and brine, and the organic phase was dried over sodium sulfate. Removal of the solvent under vacuum afforded a crude product which was used in the next step without purification.

To a solution of above product and ethylene glycol (2.79 g, 45 mmol) in toluene (30 mL) was added p-toluenesulfonic acid (19.0 mg, 0.1 mmol). The reaction mixture was heated at reflux overnight with a Dean-Stark trap. The mixture was cooled to room temperature, diluted with ethyl acetate (60 mL), and washed with saturated aqueous sodium bicarbonate (10 mL × 2) and brine (10 mL × 2). The organic phase was dried over sodium sulfate and concentrated in vacuum. Flash column chromatography over silica column afforded **22**. Yield: (1.09 g, 78% for three steps). **<sup>1</sup>H NMR** (500 MHz, CDCl<sub>3</sub>) δ 4.09 – 3.63 (m, 4H), 2.57 – 2.23 (m, 2H), 1.97 (dt, *J* = 17.4, 8.8 Hz, 1H), 1.87 – 1.42 (m, 14H), 1.33 (td, *J* = 13.7, 3.9 Hz, 1H), 1.24 – 1.08 (m, 3H), 1.03 (s, 3H), 0.99 (d, *J* = 12.0 Hz, 1H), 0.86 (s, 3H). **<sup>13</sup>C NMR** (126 MHz, CDCl<sub>3</sub>) δ 136.9, 123.6, 118.5, 65.1, 64.0, 55.0, 54.46, 47.8, 45.2, 40.9, 40.7, 38.9, 38.0, 35.7, 32.7, 23.6, 21.3, 20.7, 20.1, 19.4, 18.7. **IR**:  $\bar{\nu}$  1737, 1440, 1365, 1265, 1228, 1216, 897, 742, 704 cm<sup>-1</sup>. **HRMS** (ESI) *m/z*: anal. calculated for [C<sub>21</sub>H<sub>32</sub>O<sub>2</sub> + H]<sup>+</sup>: 317.2475, found: 317.2466.

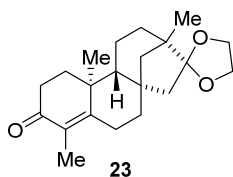

**23**, yield: 0.5 mmol scale, 68%. **<sup>1</sup>H NMR** (500 MHz, CDCl<sub>3</sub>) δ 4.04 – 3.71 (m, 4H), 2.62 (dt, *J* = 14.2, 3.5 Hz, 1H), 2.51 – 2.29 (m, 3H), 2.13 – 1.91 (m, 2H), 1.88 – 1.54 (m, 10H), 1.47 (td, *J* = 13.7, 3.4 Hz, 1H), 1.32 – 1.14 (m, 5H), 1.02 (dd, *J* = 11.5, 2.9 Hz, 1H), 0.88 (s, 3H). **<sup>13</sup>C NMR** (126 MHz, CDCl<sub>3</sub>) δ 198.9, 164.1, 128.0, 118.0, 65.2, 64.2, 54.6, 53.9, 47.7, 45.3, 40.6, 39.4, 39.1, 36.1, 35.2, 33.2, 26.0, 20.8, 19.9, 18.6, 11.0. **IR**:  $\bar{\nu}$  3457, 1665, 1449, 1366, 1275, 1228, 1054, 764, 663 cm<sup>-1</sup>. **HRMS** (ESI) *m/z*: anal. calculated for [C<sub>21</sub>H<sub>30</sub>O<sub>3</sub> + H]<sup>+</sup>: 331.2267, found: 331.2258.

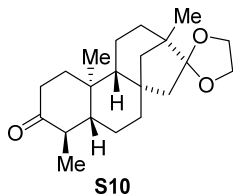

A mixture of compound **23** (484 mg, 1.46 mmol,) and PtO<sub>2</sub> (100 mg) in EtOAc (20 mL) was hydrogenated at room temperature for 12 h under hydrogen atmosphere. The suspension was filtered through a pad of celite and the pad was washed with CH<sub>2</sub>Cl<sub>2</sub>. The combined filtrates were concentrated to dryness afforded of a crude product which was used in the next step without purification.

To a solution of above product in MeOH (10 mL) was added NaOMe (394 mg, 7.3 mmol)

under Ar atmosphere. The reaction mixture was stirred, diluted with ethyl acetate (80 mL), and washed with brine (10 mL  $\times$  2). The organic phase was dried over sodium sulfate and concentrated in vacuum. Flash column chromatography over silica column afforded **S10**. Yield: (349 mg, 72% for two steps).  $^1\text{H NMR}$  (500 MHz,  $\text{CDCl}_3$ )  $\delta$  4.01 – 3.71 (m, 4H), 2.51 – 2.38 (m, 1H), 2.35 – 2.21 (m, 3H), 2.02 (ddd,  $J$  = 13.2, 6.7, 2.5 Hz, 1H), 1.75 (ddt,  $J$  = 12.7, 5.1, 2.7 Hz, 1H), 1.71 – 1.48 (m, 6H), 1.45 – 1.09 (m, 5H), 1.08 (s, 3H), 1.05 – 0.92 (m, 5H), 0.85 (s, 3H).  $^{13}\text{C NMR}$  (126 MHz,  $\text{CDCl}_3$ )  $\delta$  213.5, 118.5, 65.1, 64.0, 54.9, 53.8, 53.7, 48.4, 45.1, 44.8, 40.3, 40.3, 39.4, 37.4, 36.9, 35.5, 23.6, 20.9, 20.0, 12.8, 11.7. **IR**:  $\bar{\nu}$  2948, 1453, 1153, 1098, 1044, 997, 950, 897, 837, 735, 707  $\text{cm}^{-1}$ . **HRMS** (ESI)  $m/z$ : anal. calculated for  $[\text{C}_{21}\text{H}_{32}\text{O}_3 + \text{Na}]^+$ : 355.2244, found: 355.2230.

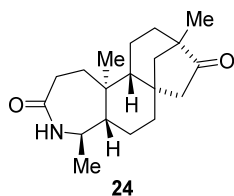

**24**, white solid. Yield: (100 mg, 40% for two steps).  $^1\text{H NMR}$  (500 MHz,  $\text{CDCl}_3$ )  $\delta$  6.16 – 5.91 (m, 1H), 3.79 – 3.57 (m, 1H), 2.81 – 2.65 (m, 2H), 2.27 (ddt,  $J$  = 14.8, 7.6, 1.8 Hz, 1H), 2.02 – 1.84 (m, 3H), 1.77 – 1.53 (m, 5H), 1.54 – 1.22 (m, 7H), 1.21 (d,  $J$  = 6.8 Hz, 3H), 1.13 – 1.06 (m, 1H), 1.05 (d,  $J$  = 2.0 Hz, 2H), 1.01 (s, 3H).  $^{13}\text{C NMR}$  (126 MHz,  $\text{CDCl}_3$ )  $\delta$  221.7, 177.0, 54.2, 53.9, 52.9, 48.5, 48.5, 46.8, 40.2, 39.6, 39.0, 37.1, 35.9, 30.8, 22.5, 20.6, 19.6, 19.4, 13.1. **IR**:  $\bar{\nu}$  3222, 1452, 1365, 1265, 1167, 1138, 1073, 977, 901, 731, 701  $\text{cm}^{-1}$ . **HRMS** (ESI)  $m/z$ : anal. calculated for  $[\text{C}_{19}\text{H}_{29}\text{NO}_2 + \text{H}]^+$ : 304.2271, found: 304.2277.

#### Procedure for synthesis of 27a-c.

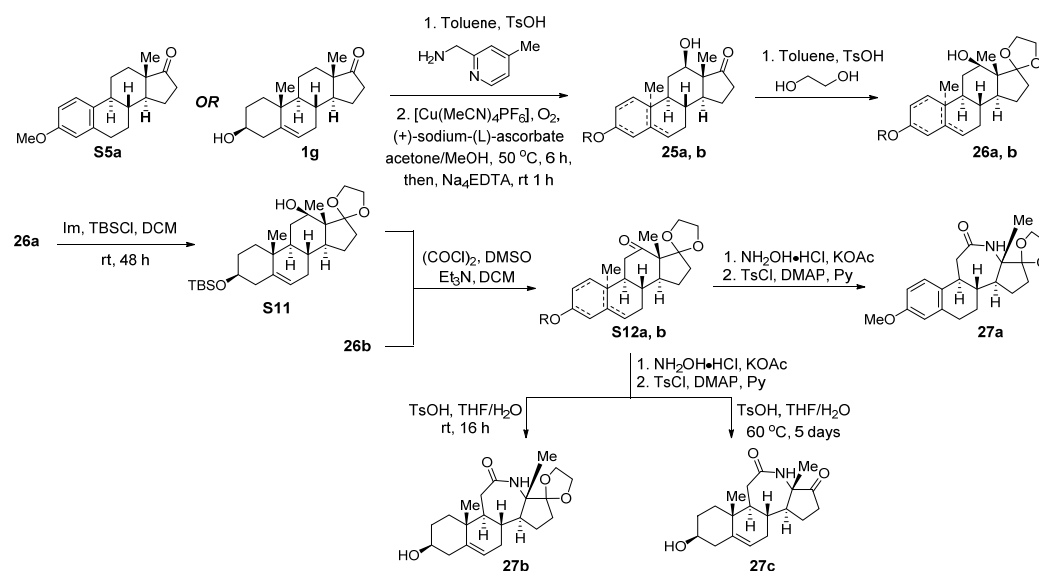

**Supplementary Figure 10. Copper-mediated C-H oxidation/C-ring expansion of DHEA and estrone.** **25a** and **25b** were prepared following the procedures reported by Baran's group.<sup>9</sup> Protection the ketone group of **25** was realized using the standard ethylene glycol protection procedure. General procedure C was used for Backman rearrangement of **24**. The TBS of **27b** was

removed as procedure D. The ethylene glycol protection group of **27c** was removed by heating to reflux for 5 days.

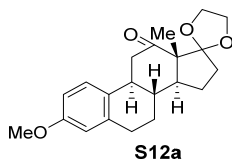

**S12a**, yield: (90% from **25a**).  $^1\text{H NMR}$  (500 MHz,  $\text{CDCl}_3$ )  $\delta$  7.05 (d,  $J = 8.7$  Hz, 1H), 6.73 (dd,  $J = 8.6, 2.7$  Hz, 1H), 6.68 (d,  $J = 2.9$  Hz, 1H), 4.28 (q,  $J = 7.1$  Hz, 1H), 4.13 (td,  $J = 6.7, 3.9$  Hz, 1H), 4.01 (td,  $J = 6.8, 4.0$  Hz, 1H), 3.90 (q,  $J = 7.0$  Hz, 1H), 3.79 (s, 3H), 2.94 (dq,  $J = 9.8, 5.7, 4.8$  Hz, 3H), 2.75 (td,  $J = 11.9, 5.0$  Hz, 1H), 2.53 (dd,  $J = 15.2, 13.0$  Hz, 1H), 2.17 (td,  $J = 11.9, 6.0$  Hz, 1H), 2.12 – 2.00 (m, 2H), 1.94 – 1.73 (m, 3H), 1.58 – 1.39 (m, 2H), 1.13 (s, 3H).  $^{13}\text{C NMR}$  (126 MHz,  $\text{CDCl}_3$ )  $\delta$  209.3, 157.9, 137.7, 130.8, 126.1, 116.8, 114.0, 111.7, 65.8, 65.4, 58.2, 55.2, 48.8, 43.5, 43.4, 37.9, 34.6, 29.6, 26.4, 20.4, 15.0. **HRMS** (ESI)  $m/z$ : anal. calculated for  $[\text{C}_{21}\text{H}_{26}\text{O}_4 + \text{H}]^+$ : 343.1904, found: 343.1897.

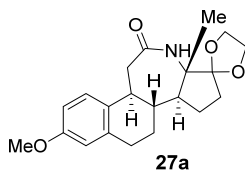

**27a**, yield: (66% from **S12a**).  $^1\text{H NMR}$  (500 MHz,  $\text{CDCl}_3$ )  $\delta$  7.34 (d,  $J = 8.7$  Hz, 1H), 6.75 (dd,  $J = 8.8, 2.8$  Hz, 1H), 6.60 (d,  $J = 2.8$  Hz, 1H), 6.10 (s, 1H), 4.12 (td,  $J = 7.3, 5.3$  Hz, 1H), 4.05 – 3.88 (m, 3H), 3.78 (s, 3H), 3.20 – 3.00 (m, 1H), 2.80 (qd,  $J = 17.1, 16.5, 3.7$  Hz, 4H), 2.12 (td,  $J = 11.2, 7.9$  Hz, 1H), 2.04 – 1.67 (m, 5H), 1.56 – 1.13 (m, 5H).  $^{13}\text{C NMR}$  (126 MHz,  $\text{CDCl}_3$ )  $\delta$  175.7, 157.6, 138.6, 130.4, 128.8, 117.5, 113.5, 112.1, 64.8, 63.8, 61.1, 55.2, 51.2, 44.5, 43.6, 41.3, 30.7, 30.2, 26.9, 23.7, 17.6. **IR**:  $\bar{\nu}$  3386, 3054, 1645, 1503, 1379, 1318, 1172, 1132, 1062, 1034, 917, 880, 812, 702  $\text{cm}^{-1}$ . **HRMS** (ESI)  $m/z$ : anal. calculated for  $[\text{C}_{21}\text{H}_{27}\text{NO}_4 + \text{H}]^+$ : 358.2013, found: 358.2010. LC-MS ( $t_R = 1.85$  min,  $\lambda = 254$  nm, purity >99%).

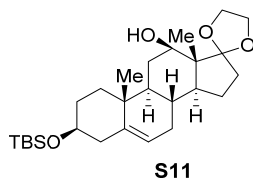

**S11**, yield: (90% from **26a**).  $^1\text{H NMR}$  (500 MHz,  $\text{CDCl}_3$ )  $\delta$  5.41 – 5.19 (m, 1H), 3.99 (dq,  $J = 11.7, 6.0, 5.6$  Hz, 4H), 3.88 (q,  $J = 6.0$  Hz, 1H), 3.48 (tt,  $J = 10.5, 4.6$  Hz, 1H), 2.39 – 2.09 (m, 2H), 2.09 – 1.87 (m, 2H), 1.88 – 1.63 (m, 6H), 1.63 – 1.30 (m, 6H), 1.13 – 0.97 (m, 5H), 0.93 (s, 3H), 0.89 (s, 9H), 0.06 (s, 6H).  $^{13}\text{C NMR}$  (126 MHz,  $\text{CDCl}_3$ )  $\delta$  141.5, 120.7, 119.1, 72.4, 71.3, 64.6, 64.1, 49.2, 49.1, 48.7, 42.7, 37.3, 36.7, 33.8, 32.0, 31.2, 30.8, 29.4, 25.9, 22.3, 19.4, 18.2, 8.8, -4.6, -4.6. **IR**:  $\bar{\nu}$  2857, 1436, 1306, 1092, 1034, 1001, 950, 887, 774, 704  $\text{cm}^{-1}$ . **HRMS** (ESI)  $m/z$ : anal. calculated for  $[\text{C}_{27}\text{H}_{46}\text{O}_4\text{Si} + \text{Na}]^+$ : 485.3058, found: 485.3048.



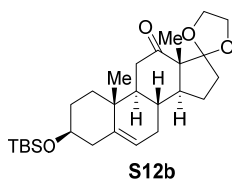

**S12b**, yield: (74% from **S11**).  $^1\text{H NMR}$  (500 MHz,  $\text{CDCl}_3$ )  $\delta$  5.37 (d,  $J = 5.1$  Hz, 1H), 4.22 (q,  $J = 7.1$  Hz, 1H), 4.11 (td,  $J = 6.6, 3.9$  Hz, 1H), 3.98 (td,  $J = 6.8, 4.0$  Hz, 1H), 3.87 (q,  $J = 7.0$  Hz, 1H), 3.49 (tt,  $J = 10.6, 4.9$  Hz, 1H), 2.45 (dd,  $J = 15.9, 12.8$  Hz, 1H), 2.37 – 2.20 (m, 3H), 2.13 (dq,  $J = 17.1, 3.8, 2.8$  Hz, 1H), 2.08 – 1.89 (m, 2H), 1.88 – 1.61 (m, 6H), 1.48 (dddd,  $J = 35.3, 17.3, 13.2, 8.1$  Hz, 3H), 1.12 (s, 3H), 1.06 (s, 3H), 1.02 (dd,  $J = 13.6, 3.8$  Hz, 1H), 0.90 (s, 9H), 0.07 (s, 6H).  $^{13}\text{C NMR}$  (126 MHz,  $\text{CDCl}_3$ )  $\delta$  210.7, 141.1, 120.6, 116.8, 72.1, 65.9, 65.4, 57.6, 50.7, 49.8, 42.6, 38.5, 36.9, 36.9, 34.4, 31.8, 31.2, 30.6, 25.9, 20.8, 19.0, 18.2, 15.1, -4.6. **IR**:  $\bar{\nu}$  3367, 2933, 1713, 1641, 1377, 1252, 1187, 1087, 954, 886, 834, 669  $\text{cm}^{-1}$ . **HRMS** (ESI)  $m/z$ : anal. calculated for  $[\text{C}_{27}\text{H}_{44}\text{O}_4\text{Si} + \text{NH}_4]^+$ : 461.3082, found: 461.3066.

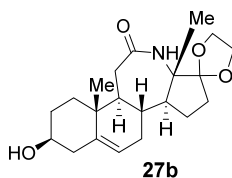

**27b**, yield: (40% from **S11**).  $^1\text{H NMR}$  (500 MHz,  $\text{CDCl}_3$ )  $\delta$  6.16 (s, 1H), 5.36 (dt,  $J = 4.5, 2.2$  Hz, 1H), 4.10 (tt,  $J = 4.8, 3.1$  Hz, 1H), 4.05 – 3.82 (m, 3H), 3.53 (dt,  $J = 11.3, 6.2$  Hz, 1H), 2.66 (t,  $J = 13.1$  Hz, 1H), 2.52 – 2.38 (m, 1H), 2.32 (ddd,  $J = 13.1, 5.0, 2.4$  Hz, 1H), 2.28 – 2.16 (m, 1H), 2.16 – 1.71 (m, 10H), 1.70 – 1.58 (m, 1H), 1.58 – 1.45 (m, 1H), 1.41 (s, 3H), 1.35 – 1.22 (m, 1H), 1.15 (td,  $J = 13.7, 3.7$  Hz, 1H), 0.98 (s, 3H).  $^{13}\text{C NMR}$  (126 MHz,  $\text{CDCl}_3$ )  $\delta$  176.7, 139.6, 120.9, 117.7, 71.2, 64.7, 63.9, 60.4, 52.0, 46.7, 41.9, 37.6, 36.9, 36.6, 35.8, 31.5, 31.4, 30.2, 24.2, 18.4, 17.0. **IR**:  $\bar{\nu}$  3388, 2935, 1739, 1639, 1436, 1367, 1216, 1137, 1052, 951, 702  $\text{cm}^{-1}$ . **HRMS** (ESI)  $m/z$ : anal. calculated for  $[\text{C}_{21}\text{H}_{31}\text{NO}_4 + \text{H}]^+$ : 362.2326, found: 362.2322.

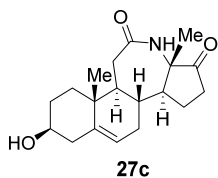

**27c**, yield: (32% from **S11**).  $^1\text{H NMR}$  (500 MHz,  $\text{CDCl}_3$ )  $\delta$  6.41 (s, 1H), 5.40 (dd,  $J = 5.1, 2.5$  Hz, 1H), 3.54 (ddt,  $J = 16.0, 10.9, 4.7$  Hz, 1H), 2.73 – 2.46 (m, 3H), 2.35 (ddd,  $J = 13.2, 5.0, 2.4$  Hz, 1H), 2.32 – 2.12 (m, 4H), 2.03 (dt,  $J = 13.4, 3.5$  Hz, 1H), 1.93 (tdd,  $J = 18.9, 11.5, 2.8$  Hz, 3H), 1.69 (td,  $J = 12.3, 11.1, 6.4$  Hz, 2H), 1.64 – 1.48 (m, 2H), 1.43 (td,  $J = 10.7, 3.6$  Hz, 1H), 1.33 (s, 3H), 1.15 (td,  $J = 13.7, 3.6$  Hz, 1H), 0.99 (s, 3H).  $^{13}\text{C NMR}$  (126 MHz,  $\text{CDCl}_3$ )  $\delta$  213.8, 175.0, 139.8, 120.4, 71.1, 61.4, 53.1, 46.8, 41.9, 37.7, 37.5, 36.5, 34.8, 32.1, 31.4, 31.0, 22.5, 18.5, 16.7. **IR**:  $\bar{\nu}$  3318, 2928, 1656, 1449, 1372, 1265, 1167, 1120, 1024, 929, 823, 732, 662  $\text{cm}^{-1}$ . **HRMS** (ESI)  $m/z$ : anal. calculated for  $[\text{C}_{19}\text{H}_{27}\text{NO}_3 + \text{H}]^+$ : 318.2064, found: 318.2056. LC-MS ( $t_{\text{R}} = 0.97$  min,  $\lambda = 210$  nm, purity >99%).

## Procedure for synthesis of 29.

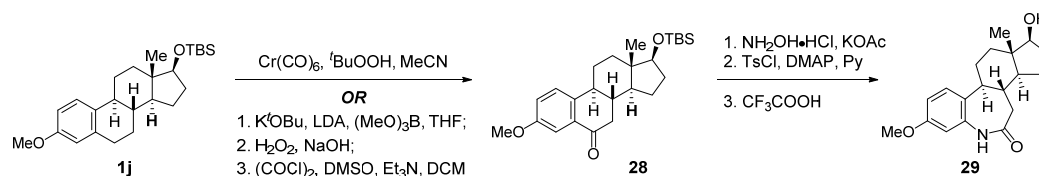

## Supplementary Figure 11. Benzylic C-H oxidation.

**1j** was prepared following literature procedure.<sup>10</sup>

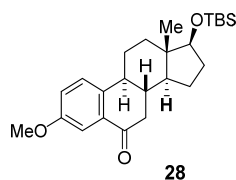

### Procedure I:

To a solution of **1i** (1.42 g, 3.78 mmol) in acetonitrile (25 mL) was added tert-butyl hydroperoxide (1.14 mL, 11.40 mmol) and chromium hexacarbonyl (250 mg, 1.14 mmol). The mixture was boiled under reflux for 23 h and then cooled to room temperature. Water (100 mL) was added and the product was extracted with ether (3 × 20 mL). The extracts were washed with water, aqueous sodium hydrogen carbonate, and brine, dried ( $\text{MgSO}_4$ ), and evaporated to give the crude product. Purification by flash chromatography afforded **28** as a white solid (469 mg, 30%).

### Procedure II:

After a solution of  $t\text{-BuOK}$  (4.90 g, 44.5 mmol) in dry THF (50 mL) was cooled to  $-78^\circ\text{C}$ , LDA (29.7 mL, 1.8 M, 44.5 mmol) was added and the mixture was stirred for 30 min at  $-78^\circ\text{C}$ . Compound **1i** (4.4 g, 11.0 mmol) was then added to the reaction mixture and was stirred for 3 h at  $-78^\circ\text{C}$ . Trimethyl borate (15 mL) was added, and the reaction was warmed to  $0^\circ\text{C}$ , yielding a milky yellow suspension. After stirring for 2 h,  $\text{H}_2\text{O}_2$  (17 mL, 30% in water) was added, and the mixture was stirred for 1 h at room temperatures. The reaction mixture was cooled to  $0^\circ\text{C}$  and 10%  $\text{Na}_2\text{S}_2\text{O}_3$  (100 mL) was added. After extraction with ethyl acetate and drying over  $\text{Na}_2\text{SO}_4$ , flash column chromatography yielded the alcohol which was used directly for next step.

DMSO (2.48 g, 30.0 mmol) was dissolved in DCM (40 mL) and cooled to  $-78^\circ\text{C}$ .  $(\text{COCl})_2$  (7.5 mL, 2.0 M, 15.0 mmol) was then added dropwise, and the solution was stirred for 15 min, and the above product dissolved in DCM (20 mL) was added. The reaction was kept for 50 min at this temperature.  $\text{Et}_3\text{N}$  (6.06 g, 60 mmol) was added. The reaction was allowed to warm to rt. The mixture was diluted with ethyl acetate (100 mL), and washed with  $\text{NaHCO}_3$  (30 mL × 2) and brine (50 mL × 2). The organic phase was dried over sodium sulfate and concentrated in vacuum. Flash column chromatography over silica column afforded **28**. Yield: (2.3 g, 50% for two steps).  $^1\text{H NMR}$  (400 MHz,  $\text{CDCl}_3$ )  $\delta$  7.56 (t,  $J = 2.3$  Hz, 1H), 7.34 (d,  $J = 8.6$  Hz, 1H), 7.11 (dt,  $J = 8.8, 2.3$  Hz, 1H), 3.84 (s, 3H), 3.66 (t,  $J = 8.3$  Hz, 1H), 2.74 (dt,  $J = 17.0, 2.4$  Hz, 1H), 2.46 (td,  $J = 11.4, 4.6$  Hz, 1H), 2.42 – 2.29 (m, 1H), 2.20 (ddd,  $J = 16.6, 13.6, 1.7$  Hz, 1H), 2.03 – 1.81 (m, 3H), 1.74 – 1.41 (m, 3H), 1.30 (q,  $J = 13.0, 11.0$  Hz, 3H), 0.90 (d,  $J = 1.7$  Hz, 9H), 0.75 (d,  $J = 1.7$  Hz, 3H), 0.04 (dd,

$J = 5.5, 1.7$  Hz, 6H).  $^{13}\text{C}$  NMR (101 MHz,  $\text{CDCl}_3$ )  $\delta$  198.2, 158.1, 139.8, 133.4, 126.6, 121.5, 109.5, 81.4, 55.5, 49.6, 44.1, 43.4, 43.1, 40.2, 36.6, 30.8, 25.8, 25.6, 23.0, 18.1, 11.2, -4.5, -4.8. **IR**:  $\bar{\nu}$  3372, 2956, 1737, 1608, 1418, 1319, 1170, 1070, 909, 867, 813, 770, 667  $\text{cm}^{-1}$ . **HRMS** (ESI)  $m/z$ : anal. calculated for  $[\text{C}_{25}\text{H}_{38}\text{O}_3\text{Si} + \text{H}]^+$ : 415.2663, found: 415.2657.

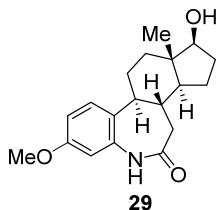

**29**, yield: 54% from **28**.  $^1\text{H}$  NMR (500 MHz,  $\text{CDCl}_3$ )  $\delta$  8.08 (s, 1H), 7.18 (d,  $J = 8.5$  Hz, 1H), 6.76 (dd,  $J = 8.5, 2.6$  Hz, 1H), 6.58 (d,  $J = 2.6$  Hz, 1H), 4.87 (dd,  $J = 9.3, 7.6$  Hz, 1H), 3.81 (s, 3H), 2.46 (dd,  $J = 12.7, 8.8$  Hz, 2H), 2.37 – 2.24 (m, 1H), 2.15 (dd,  $J = 12.8, 2.1$  Hz, 1H), 2.08 – 1.94 (m, 3H), 1.90 (dt,  $J = 12.9, 3.2$  Hz, 1H), 1.83 – 1.62 (m, 3H), 1.42 (dtd,  $J = 40.7, 12.6, 5.1$  Hz, 2H), 0.93 (s, 3H).  $^{13}\text{C}$  NMR (126 MHz,  $\text{CDCl}_3$ )  $\delta$  174.0, 158.6, 138.3, 129.2, 126.1, 112.0, 107.8, 86.2, 55.4, 48.8, 45.5, 44.0, 44.0, 36.4, 35.5, 26.9, 24.9, 23.5, 12.0. **IR**:  $\bar{\nu}$  3016, 1435, 1366, 1228, 1091, 899, 764  $\text{cm}^{-1}$ . **HRMS** (ESI)  $m/z$ : anal. calculated for  $[\text{C}_{19}\text{H}_{25}\text{NO}_3 + \text{H}]^+$ : 316.1907, found: 316.1899. LC-MS ( $t_{\text{R}} = 2.92$  min,  $\lambda = 254$  nm, purity 95%).

#### C-H oxidation/ring expansion of picfeltarraegenin and kirenol.

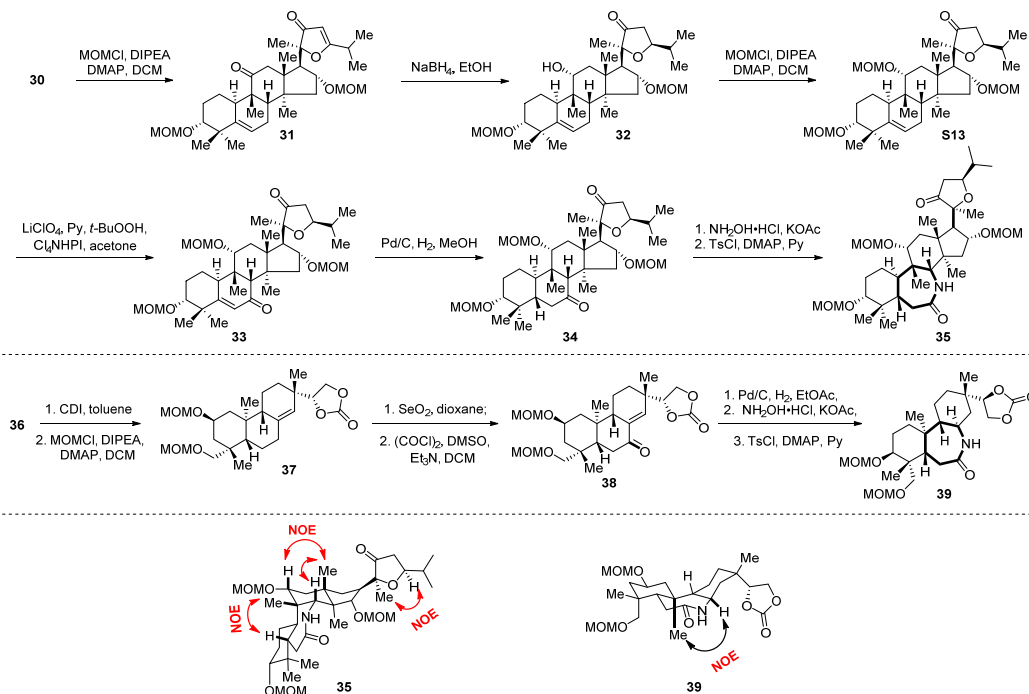

**Supplementary Figure 12. C-H oxidation/ring expansion of picfeltarraegenin and kirenol.** The electrochemical allylic oxidation was performed following procedure reported by Baran's group<sup>8</sup> using IKA ElectraSyn 2.0. General procedure C was used for Backman rearrangement. The relative stereochemistry of **35** and **39** was confirmed by NOE experiment.

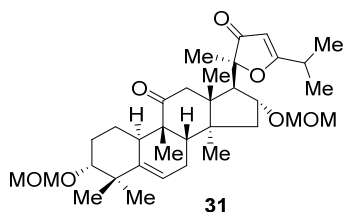

To a solution of **30** (2.42 g, 5.0 mol) in DCM (60 mL) was added MOMCl (1.21 g, 15.0 mmol), DIPEA (2.58 g, 20.0 mmol) and DMAP (12.2 g, 0.10 mmol). The reaction mixture was heated at reflux for 48 h. The mixture was cooled to room temperature, diluted with ethyl acetate (80 mL), and washed with 2N HCl (20 mL  $\times$  2), NaHCO<sub>3</sub> (20 mL  $\times$  2) and brine (20 mL  $\times$  2). The organic phase was dried over sodium sulfate and concentrated in vacuum. Flash column chromatography over silica column afforded **31** as a yellow oil. Yield: (2.29 g, 80%). **<sup>1</sup>H NMR** (500 MHz, CDCl<sub>3</sub>)  $\delta$  5.66 (dt,  $J = 6.4, 2.2$  Hz, 1H), 5.37 (s, 1H), 4.70 (d,  $J = 6.8$  Hz, 1H), 4.57 (d,  $J = 6.8$  Hz, 1H), 4.52 (d,  $J = 6.9$  Hz, 1H), 4.40 (d,  $J = 6.9$  Hz, 1H), 3.91 (t,  $J = 7.6$  Hz, 1H), 3.36 (s, 3H), 3.32 (s, 3H), 3.16 (d,  $J = 14.6$  Hz, 1H), 3.07 (dd,  $J = 11.5, 4.3$  Hz, 1H), 2.83 – 2.71 (m, 1H), 2.69 (d,  $J = 6.9$  Hz, 1H), 2.50 (d,  $J = 14.4$  Hz, 1H), 2.35 (ddt,  $J = 19.1, 8.3, 2.7$  Hz, 1H), 2.19 (d,  $J = 12.6$  Hz, 1H), 1.98 – 1.82 (m, 4H), 1.76 – 1.59 (m, 3H), 1.55 (d,  $J = 13.5$  Hz, 1H), 1.38 (s, 3H), 1.29 – 1.20 (m, 9H), 1.15 (s, 3H), 1.04 (s, 3H), 0.94 (s, 3H), 0.85 (s, 3H). **<sup>13</sup>C NMR** (126 MHz, CDCl<sub>3</sub>)  $\delta$  213.2, 206.5, 195.8, 142.1, 117.9, 100.3, 97.4, 95.8, 90.3, 82.4, 78.1, 56.5, 56.1, 55.5, 49.3, 48.7, 48.1, 47.6, 42.9, 42.5, 41.9, 35.3, 30.2, 27.4, 24.8, 24.4, 23.7, 22.1, 21.2, 20.1, 19.6, 19.6, 19.6, 19.5, 18.5. **IR**:  $\bar{\nu}$  3455, 2946, 1591, 1440, 1365, 1267, 1145, 1045, 1001, 916, 805, 734, 702 cm<sup>-1</sup>. **HRMS** (ESI)  $m/z$ : anal. calculated for [C<sub>34</sub>H<sub>52</sub>O<sub>7</sub> + H]<sup>+</sup>: 573.3786, found: 573.3768.

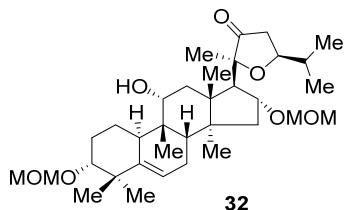

To a solution of **31** (2.29 g, 4.0 mol) in EtOH (100 mL) was added NaBH<sub>4</sub> (2.28 g, 60.0 mmol) at 0 °C. The reaction mixture was stirred at rt for 24 h. After quenching with NH<sub>4</sub>Cl solution, EtOH was removed in vacuum then the reaction mixture was diluted with ethyl acetate (200 mL), and washed with brine (40 mL  $\times$  2). The organic phase was dried over sodium sulfate and concentrated in vacuum. Flash column chromatography over silica column afforded **32** as a yellow oil. Yield: (1.38 g, 60%). **<sup>1</sup>H NMR** (500 MHz, CDCl<sub>3</sub>)  $\delta$  5.68 (dt,  $J = 4.3, 2.1$  Hz, 1H), 4.72 (dd,  $J = 8.4, 6.7$  Hz, 2H), 4.66 (d,  $J = 6.5$  Hz, 1H), 4.57 (td,  $J = 8.4, 7.6, 2.1$  Hz, 3H), 4.02 – 3.84 (m, 1H), 3.36 – 3.43 (m, 7H), 3.12 – 2.99 (m, 2H), 2.68 – 2.54 (m, 2H), 2.37 (ddt,  $J = 19.0, 8.1, 2.6$  Hz, 1H), 2.19 (ddd,  $J = 11.8, 7.4, 4.2$  Hz, 2H), 1.97 – 1.81 (m, 3H), 1.80 – 1.54 (m, 4H), 1.41 (dt,  $J = 13.5, 10.2$  Hz, 1H), 1.36 – 1.20 (m, 8H), 1.16 (s, 3H), 1.04 (s, 3H), 0.93 (d,  $J = 7.4$  Hz, 6H), 0.88 (s, 3H), 0.86 (d,  $J = 6.7$  Hz, 3H). **<sup>13</sup>C NMR** (126 MHz, CDCl<sub>3</sub>)  $\delta$  213.8, 142.1, 118.0, 97.0, 95.8, 85.0, 82.9, 82.4, 79.8, 79.0, 56.8, 55.5, 54.0, 49.8, 48.5, 48.4, 47.9, 42.7, 41.9, 41.5, 39.8, 35.3, 33.5, 27.5, 26.5, 24.8, 24.4, 23.7, 21.2, 20.1, 19.6, 18.8, 18.8, 18.7. **HRMS** (ESI)  $m/z$ : anal. calculated for C<sub>34</sub>H<sub>56</sub>O<sub>7</sub> [M + Na]<sup>+</sup>: 599.3918, found: 599.3910.

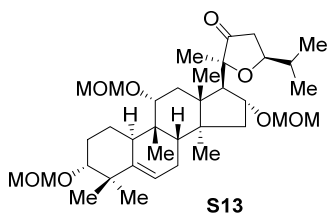

To a solution of **32** (1.00 g, 1.74 mol.) in DCM (40 mL) was added MOMCl (431 mg, 5.22 mmol), DIPEA (1.12 g, 8.7 mmol) and DMAP (12.2 mg, 0.10 mmol). The reaction mixture was heated at reflux for 48 h. The mixture was cooled to room temperature, diluted with ethyl acetate (80 mL), and washed with 2N HCl (20 mL  $\times$  2), NaHCO<sub>3</sub> (20 mL  $\times$  2) and brine (20 mL  $\times$  2). The organic phase was dried over sodium sulfate and concentrated in vacuum. Flash column chromatography over silica column afforded **S13** as a yellow oil. Yield: (906 mg, 84%). **<sup>1</sup>H NMR** (500 MHz, CDCl<sub>3</sub>)  $\delta$  5.68 (dt,  $J$  = 6.2, 2.1 Hz, 1H), 4.73 – 4.50 (m, 6H), 4.41 (t,  $J$  = 7.4 Hz, 1H), 3.83 (dd,  $J$  = 6.1, 4.7 Hz, 1H), 3.45 (q,  $J$  = 7.6 Hz, 1H), 3.41 – 3.32 (m, 9H), 3.07 (dd,  $J$  = 11.6, 4.3 Hz, 1H), 3.01 (d,  $J$  = 14.6 Hz, 1H), 2.77 (d,  $J$  = 6.7 Hz, 1H), 2.46 (d,  $J$  = 14.6 Hz, 1H), 2.36 (ddt,  $J$  = 19.0, 8.0, 2.6 Hz, 1H), 2.20 (td,  $J$  = 13.4, 6.7 Hz, 2H), 1.94 (dd,  $J$  = 19.1, 6.1 Hz, 1H), 1.87 (dd,  $J$  = 9.7, 6.0 Hz, 2H), 1.83 – 1.63 (m, 5H), 1.60 (d,  $J$  = 13.2 Hz, 1H), 1.41 (dt,  $J$  = 13.2, 10.2 Hz, 1H), 1.26 (s, 3H), 1.23 (s, 3H), 1.15 (s, 3H), 1.03 (s, 3H), 0.95 (d,  $J$  = 6.8 Hz, 3H), 0.94 (s, 3H), 0.85 (d,  $J$  = 6.9 Hz, 3H), 0.84 (s, 3H). **<sup>13</sup>C NMR** (126 MHz, CDCl<sub>3</sub>)  $\delta$  214.6, 142.0, 118.2, 97.0, 96.7, 95.8, 86.1, 85.3, 82.5, 80.4, 79.1, 55.9, 55.7, 55.7, 55.5, 49.7, 48.7, 48.6, 47.1, 43.2, 43.0, 41.9, 36.2, 35.4, 33.8, 27.5, 25.7, 24.9, 24.4, 23.9, 21.2, 20.6, 20.2, 19.8, 19.0, 18.5. **IR:**  $\bar{\nu}$  3455, 2950, 1692, 1267, 1228, 1146, 1099, 1037, 917, 736 cm<sup>-1</sup>. **HRMS** (ESI)  $m/z$ : anal. calculated for [C<sub>36</sub>H<sub>60</sub>O<sub>8</sub> + Na]<sup>+</sup>: 643.4180, found: 643.4160.

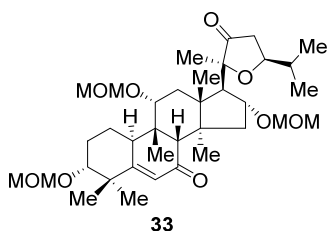

**33**, yield: 0.4 mmol scale, 58%. **<sup>1</sup>H NMR** (500 MHz, CDCl<sub>3</sub>)  $\delta$  6.19 (d,  $J$  = 2.1 Hz, 1H), 4.73 (d,  $J$  = 6.8 Hz, 1H), 4.67 – 4.53 (m, 4H), 4.47 (dd,  $J$  = 8.0, 6.5 Hz, 1H), 3.88 (dd,  $J$  = 6.3, 4.5 Hz, 1H), 3.52 – 3.42 (m, 1H), 3.41 – 3.31 (m, 8H), 3.24 (dd,  $J$  = 11.2, 4.4 Hz, 1H), 3.03 – 2.91 (m, 1H), 2.68 (dd,  $J$  = 10.8, 4.4 Hz, 2H), 2.62 (ddd,  $J$  = 12.9, 4.7, 2.1 Hz, 1H), 2.46 (s, 1H), 2.24 (dt,  $J$  = 13.3, 6.7 Hz, 1H), 2.16 (dd,  $J$  = 14.2, 8.3 Hz, 1H), 1.99 (dt,  $J$  = 13.1, 4.0 Hz, 1H), 1.88 (dq,  $J$  = 13.9, 3.9 Hz, 1H), 1.83 – 1.65 (m, 4H), 1.52 (d,  $J$  = 14.0 Hz, 2H), 1.28 (s, 3H), 1.27 – 1.13 (m, 7H), 1.08 (s, 3H), 1.06 (s, 3H), 0.96 (d,  $J$  = 6.6 Hz, 3H), 0.90 (s, 3H), 0.85 (d,  $J$  = 6.7 Hz, 3H). **<sup>13</sup>C NMR** (126 MHz, CDCl<sub>3</sub>)  $\delta$  211.9, 200.8, 167.8, 124.1, 96.4, 96.4, 95.9, 85.3, 85.3, 81.2, 80.4, 78.3, 58.5, 56.4, 56.1, 55.8, 55.7, 49.2, 48.7, 48.6, 47.0, 43.3, 42.6, 37.6, 36.2, 33.7, 27.0, 26.6, 24.0, 24.0, 22.2, 21.1, 20.8, 19.8, 19.0. **IR:**  $\bar{\nu}$  3442, 2887, 1696, 1618, 1468, 1383, 1294, 1268, 1146, 1100, 880, 735, 702 cm<sup>-1</sup>. **HRMS** (ESI)  $m/z$ : anal. Calculated for [C<sub>36</sub>H<sub>58</sub>O<sub>9</sub> + H]<sup>+</sup>: 635.4154, found: 635.4146.

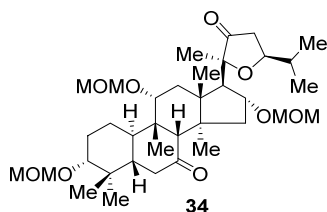

A mixture of compound **33** (546 mg, 0.86 mmol,) and Pd/C (100 mg) in MeOH (10 mL) was hydrogenated at room temperature for 4 h under hydrogen atmosphere. The suspension was filtered through a pad of celite and the pad was washed with CH<sub>2</sub>Cl<sub>2</sub>. The combined filtrates were concentrated to dryness. Flash column chromatography over silica column afforded **34** as yellow oil. Yield: (491 mg, 90%). **<sup>1</sup>H NMR** (500 MHz, CDCl<sub>3</sub>) δ 4.71 (d, *J* = 6.8 Hz, 1H), 4.67 – 4.50 (m, 5H), 4.45 (dd, *J* = 8.0, 6.4 Hz, 1H), 3.86 (dd, *J* = 6.3, 4.8 Hz, 1H), 3.47 (q, *J* = 7.6 Hz, 1H), 3.43 – 3.31 (m, 9H), 3.07 (dd, *J* = 11.6, 4.2 Hz, 1H), 2.96 – 2.85 (m, 1H), 2.71 (d, *J* = 6.4 Hz, 1H), 2.68 – 2.53 (m, 2H), 2.42 (s, 1H), 2.34 (dd, *J* = 17.6, 12.3 Hz, 1H), 2.22 (dt, *J* = 13.3, 6.6 Hz, 1H), 2.19 – 2.05 (m, 2H), 1.96 (s, 1H), 1.85 (dt, *J* = 12.5, 3.8 Hz, 1H), 1.82 – 1.62 (m, 2H), 1.58 (dd, *J* = 12.0, 5.8 Hz, 1H), 1.56 – 1.49 (m, 1H), 1.50 – 1.31 (m, 5H), 1.28 – 1.10 (m, 4H), 1.01 – 0.92 (m, 8H), 0.88 (s, 3H), 0.87 – 0.78 (m, 6H). **<sup>13</sup>C NMR** (126 MHz, CDCl<sub>3</sub>) δ 213.6, 213.1, 96.6, 96.7, 95.7, 85.678, 85.2, 82.8, 80.5, 78.3, 62.1, 56.0, 55.8, 55.8, 55.6, 51.3, 49.6, 49.3, 46.6, 43.3, 43.3, 41.1, 39.1, 36.1, 34.7, 33.7, 26.8, 26.2, 25.1, 25.1, 22.7, 20.6, 20.0, 19.8, 19.0, 13.7. **HRMS** (ESI) *m/z*: anal. calcd for C<sub>36</sub>H<sub>60</sub>O<sub>9</sub> [M + Na]<sup>+</sup> : 659.4130, found: 659.4116.

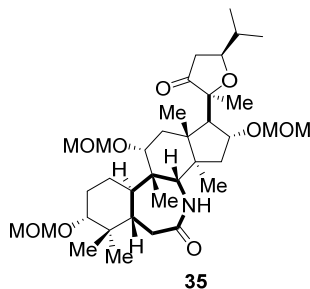

**35**, yield: 40%. **<sup>1</sup>H NMR** (500 MHz, CDCl<sub>3</sub>) δ 6.11 (t, *J* = 6.8 Hz, 1H), 4.74 – 4.53 (m, 6H), 4.49 (t, *J* = 7.3 Hz, 1H), 3.84 (t, *J* = 6.2 Hz, 1H), 3.45 (td, *J* = 8.3, 6.5 Hz, 1H), 3.36 (s, 6H), 3.35 (s, 3H), 3.09 (d, *J* = 7.6 Hz, 1H), 3.06 – 2.90 (m, 2H), 2.84 – 2.74 (m, 2H), 2.69 (dd, *J* = 14.8, 1.9 Hz, 1H), 2.55 (d, *J* = 12.7 Hz, 1H), 2.30 (td, *J* = 11.1, 5.4 Hz, 1H), 2.19 (dt, *J* = 12.8, 6.4 Hz, 1H), 1.89 – 1.62 (m, 5H), 1.59 (s, 3H), 1.46 – 1.29 (m, 2H), 1.26 (s, 3H), 1.24 – 1.14 (m, 2H), 1.12 (s, 3H), 1.10 (s, 3H), 0.94 (d, *J* = 6.6 Hz, 3H), 0.84 (d, *J* = 6.7 Hz, 3H), 0.82 (s, 3H), 0.80 (s, 3H). **<sup>13</sup>C NMR** (126 MHz, CDCl<sub>3</sub>) δ 212.1, 176.4, 97.1, 96.5, 96.0, 86.5, 84.5, 82.2, 80.5, 78.6, 63.0, 56.3, 55.9, 55.8, 55.6, 55.3, 50.3, 48.8, 46.8, 42.4, 40.2, 39.7, 39.4, 38.7, 36.1, 33.7, 26.8, 26.4, 26.3, 26.0, 21.1, 20.0, 19.8, 18.9, 17.6, 13.8. **IR**:  $\bar{\nu}$  1654, 1450, 1366, 1275, 1228, 1099, 1043, 916, 664 cm<sup>-1</sup>. **HRMS** (ESI) *m/z*: anal. calculated for [C<sub>36</sub>H<sub>61</sub>NO<sub>9</sub> + H]<sup>+</sup> : 652.4419, found: 652.4415.

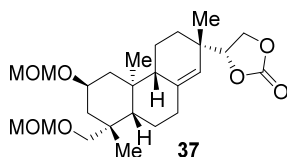

To a solution of **36** (1.56 g, 4.4 mol) in DCM (60 mL) was added MOMCl (1.41 g, 17.6 mmol), DIPEA (2.58 g, 20.0 mmol) and DMAP (12.2 g, 0.10 mmol). The reaction mixture was heated at reflux for 48 h. The mixture was cooled to room temperature, diluted with ethyl acetate (80 mL), and washed with 2N HCl (20 mL  $\times$  2), NaHCO<sub>3</sub> (20 mL  $\times$  2) and brine (20 mL  $\times$  2). The organic phase was dried over sodium sulfate and concentrated in vacuum. Flash column chromatography over silica column afforded **37** as a yellow oil. Yield: (1.59 g, 80%). <sup>1</sup>H NMR (500 MHz, CDCl<sub>3</sub>)  $\delta$  5.05 (s, 1H), 4.76 – 4.63 (m, 2H), 4.59 (d,  $J$  = 13.3 Hz, 3H), 4.39 (t,  $J$  = 8.5 Hz, 1H), 4.29 (t,  $J$  = 7.9 Hz, 1H), 3.73 (ddd,  $J$  = 11.8, 7.8, 4.1 Hz, 1H), 3.55 (d,  $J$  = 9.4 Hz, 1H), 3.36 (d,  $J$  = 8.1 Hz, 6H), 3.26 (d,  $J$  = 9.3 Hz, 1H), 2.26 (t,  $J$  = 13.0 Hz, 2H), 2.04 (q,  $J$  = 13.2, 9.2 Hz, 2H), 1.84 (t,  $J$  = 8.5 Hz, 2H), 1.78 – 1.60 (m, 3H), 1.48 (tdd,  $J$  = 13.6, 8.9, 3.7 Hz, 1H), 1.25 (dt,  $J$  = 30.9, 13.0 Hz, 3H), 1.15 – 0.87 (m, 7H), 0.78 (s, 3H). <sup>13</sup>C NMR (126 MHz, CDCl<sub>3</sub>)  $\delta$  155.2, 142.6, 123.5, 96.7, 94.5, 79.7, 71.0, 69.9, 65.6, 55.2, 55.1, 55.0, 50.5, 45.4, 42.3, 39.4, 39.1, 36.5, 36.2, 31.0, 28.2, 22.2, 21.2, 18.1, 16.7. HRMS (ESI)  $m/z$ : anal. calculated for C<sub>25</sub>H<sub>40</sub>O<sub>7</sub> [M + Na]<sup>+</sup> : 475.2666, found: 475.2653.

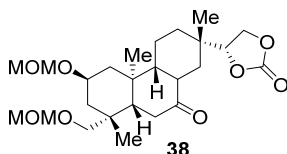

To a solution of **37** (1.40 g, 3.0 mol) in 1,4-dioxane (40 mL) was added SeO<sub>2</sub> (780 mg, 6.0 mmol) under Ar. The reaction mixture was stirred at RT for 24 h. The suspension was filtered through a pad of celite/silica gel and the pad was washed with mixture of CH<sub>2</sub>Cl<sub>2</sub>/EtOAc. The combined filtrates were concentrated to dryness to afford crude product which was directly used in the next step without further purification.

DMSO (816 mg, 12.0 mmol) was dissolved in DCM (40 mL) and cooled to –78 °C. (COCl)<sub>2</sub> (3.0 ml, 2.0 M, 6.0 mmol) was then added dropwise, and the solution was stirred for 15 min, and the above product dissolved in DCM (10 mL) was added. The reaction was kept for 50 min at this temperature. Et<sub>3</sub>N (2.02 g, 20 mmol) was added. The reaction was allowed to warm to rt. The mixture was diluted with ethyl acetate (100 mL), and washed with NaHCO<sub>3</sub> (30 mL  $\times$  2) and brine (50 mL  $\times$  2). The organic phase was dried over sodium sulfate and concentrated in vacuum. Flash column chromatography over silica column afforded **38** as white solid. Yield: (839 mg, 60% for two steps). A mixture of compound **38** (178 mg, 0.38 mmol) and Pd/C (36 mg, 10%) in EtOAc (20 mL) was hydrogenated at rt for 24 h under hydrogen atmosphere. The suspension was filtered through a pad of celite and the pad was washed with CH<sub>2</sub>Cl<sub>2</sub>. The combined filtrates were concentrated to dryness to afford of crude product. Flash column chromatography over silica column afforded **S38** as white solid. Yield: (126 mg, 70%). <sup>1</sup>H NMR (400 MHz, CDCl<sub>3</sub>)  $\delta$  4.86 – 4.76 (m, 1H), 4.76 – 4.64 (m, 2H), 4.63 – 4.53 (m, 2H), 4.39 (t,  $J$  = 8.6 Hz, 1H), 4.25 (dd,  $J$  = 8.9, 7.4 Hz, 1H), 3.84 (tt,  $J$  = 11.6, 4.2 Hz, 1H), 3.50 (d,  $J$  = 9.5 Hz, 1H), 3.42 (d,  $J$  = 9.5 Hz, 1H), 3.37 (s, 3H), 3.35 (s, 3H), 2.54 (dd,  $J$  = 14.4, 3.3 Hz, 1H), 2.43 (t,  $J$  = 14.3 Hz, 1H), 2.25 – 2.11 (m, 2H), 2.08 – 1.99 (m, 1H), 1.86 – 1.68 (m, 2H), 1.42 (ddd,  $J$  = 26.4, 13.2, 3.5 Hz, 2H), 1.34 – 1.21 (m, 2H), 1.15 (d,  $J$  = 3.2 Hz, 4H), 1.13 – 1.00 (m, 5H), 0.96 (d,  $J$  = 12.0 Hz, 1H), 0.93 (s, 3H). <sup>13</sup>C NMR (101 MHz, CDCl<sub>3</sub>)  $\delta$  210.5, 154.8, 96.7, 94.6, 78.0, 71.2, 69.5, 65.2, 55.3, 55.2, 55.2, 54.3, 44.9, 44.1, 42.9, 39.3, 38.9, 37.9, 34.9, 34.2, 33.44 27.7, 22.5, 20.6, 15.0. HRMS (ESI)  $m/z$ : anal. calculated for C<sub>25</sub>H<sub>40</sub>O<sub>8</sub> [M + Na]<sup>+</sup> : 491.2615, found: 375. 491.2627.

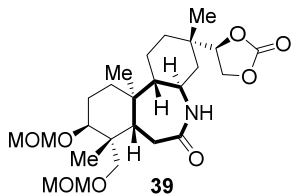

**39**, yield: (44% from **S38**).  $^1\text{H NMR}$  (500 MHz,  $\text{CDCl}_3$ )  $\delta$  5.30 (s, 1H), 4.78 – 4.69 (m, 1H), 4.66 (q,  $J = 6.8$  Hz, 2H), 4.58 (s, 2H), 4.48 (t,  $J = 8.6$  Hz, 1H), 4.27 (t,  $J = 8.1$  Hz, 1H), 3.71 (tt,  $J = 12.0$ , 3.9 Hz, 1H), 3.56 – 3.41 (m, 2H), 3.42 – 3.23 (m, 7H), 2.52 – 2.33 (m, 2H), 2.23 (td,  $J = 10.9$ , 3.6 Hz, 2H), 2.06 – 1.90 (m, 1H), 1.84 (dt,  $J = 14.8$ , 4.4 Hz, 1H), 1.76 (s, 1H), 1.66 (ddd,  $J = 13.9$ , 5.0, 2.6 Hz, 1H), 1.53 (dd,  $J = 6.8$ , 3.5 Hz, 1H), 1.50 – 1.30 (m, 1H), 1.31 – 1.11 (m, 6H), 1.07 (s, 3H), 1.03 (t,  $J = 12.2$  Hz, 1H), 0.95 (s, 3H).  $^{13}\text{C NMR}$  (126 MHz,  $\text{CDCl}_3$ )  $\delta$  177.8, 154.5, 96.6, 94.6, 78.2, 70.7, 69.3, 65.2, 55.4, 55.3, 55.2, 51.7, 46.8, 46.7, 42.3, 41.9, 40.8, 35.7, 32.7, 32.4, 28.0, 22.4, 19.8, 16.8. **HRMS** (ESI)  $m/z$ : anal. calculated for  $[\text{C}_{25}\text{H}_{41}\text{NO}_8 + \text{H}]^+$ : 484.2905, found: 484.2898.

### Derivatization of medium ring scaffolds.

#### General procedure for syntheses of carbamates.

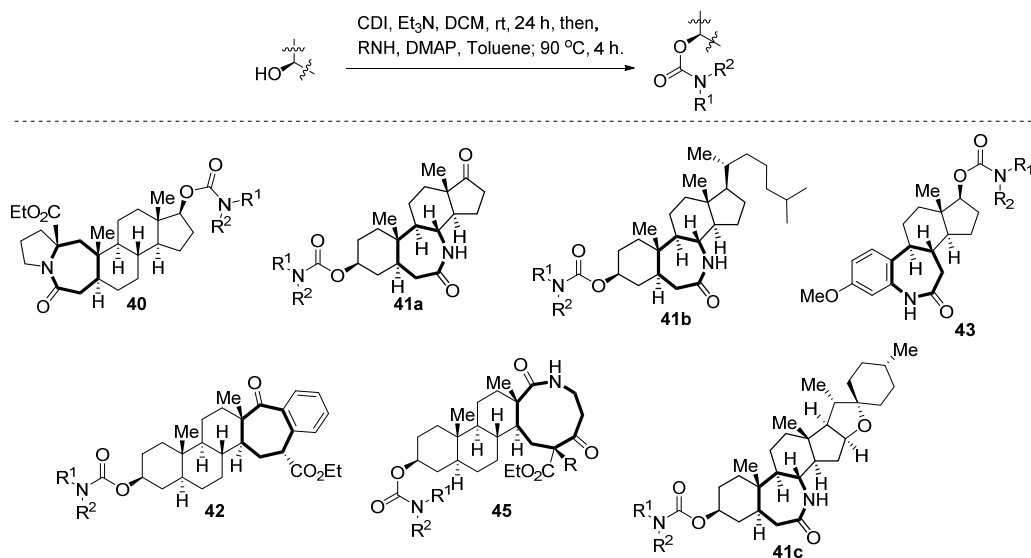

**Supplementary Figure 13. Formation of carbamates.** General procedure F was used for formation of carbamates **40**, **41**, **42** and **45**. General procedure G was used for formation of carbamates **43**.

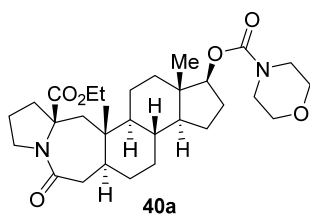

**40a**, white solid, yield: (15.4 mg, 29%).  $^1\text{H NMR}$  ( $\text{CDCl}_3$ , 500 MHz)  $\delta$  4.56 (dd,  $J = 9.1$ , 7.9 Hz,



1H), 4.29-4.23 (m, 1H), 4.18-4.11 (m, 1H), 3.78-3.73 (m, 1H), 3.66 (br, 4H), 3.55-3.50 (m, 1H), 3.46 (br, 4H), 2.77-2.72 (m, 2H), 2.47-2.43 (m, 1H), 2.21-2.13 (m, 1H), 2.07 (d,  $J = 15.2$  Hz, 1H), 2.03-1.99 (m, 1H), 1.81-1.76 (m, 2H), 1.69-1.58 (m, 4H), 1.53-1.43 (m, 3H), 1.38-1.15 (m, 9H), 1.06-1.00 (m, 1H), 0.91 (td,  $J = 12.7, 4.4$  Hz, 1H), 0.80 (s, 3H), 0.77 (s, 3H), 0.70 (td,  $J = 11.2, 3.7$  Hz, 1H).  $^{13}\text{C NMR}$  ( $\text{CDCl}_3$ , 125 MHz)  $\delta$  174.9, 173.9, 155.6, 83.8, 68.1, 61.8, 55.0, 50.7, 50.5, 49.0, 44.9, 42.9, 42.5, 40.7, 39.7, 37.1, 34.2, 31.4, 30.3, 28.0, 23.5, 21.0, 20.9, 14.2, 12.4, 12.4. **HRMS** (ESI):  $m/z$ : calculated for  $\text{C}_{30}\text{H}_{47}\text{N}_2\text{O}_6$ :  $[\text{M} + \text{H}]^+$  531.3429, found: 531.3430.

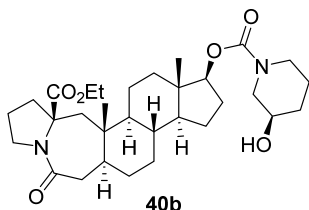

**40b**, white solid, yield: (25.6 mg, 47%).  $^1\text{H NMR}$  ( $\text{CDCl}_3$ , 500 MHz)  $\delta$  4.53 (dd,  $J = 8.9, 8.0$  Hz, 1H), 4.29-4.22 (m, 1H), 4.17-4.11 (m, 1H), 3.78-3.74 (m, 3H), 3.58-3.48 (m, 2H), 3.18-3.13 (m, 2H), 2.77-2.72 (m, 2H), 2.47-2.43 (m, 1H), 2.19-2.12 (m, 1H), 2.06 (d,  $J = 14.9$  Hz, 1H), 2.03-1.98 (m, 1H), 1.90 (m, 1H), 1.80-1.76 (m, 3H), 1.68-1.58 (m, 4H), 1.54-1.43 (m, 5H), 1.37-1.22 (m, 8H), 1.17 (td,  $J = 12.7, 3.6$  Hz, 1H), 1.05-0.99 (m, 1H), 0.90 (td,  $J = 12.6, 4.1$  Hz, 1H), 0.80 (s, 3H), 0.78 (s, 3H), 0.69 (td,  $J = 11.2, 3.8$  Hz, 1H).  $^{13}\text{C NMR}$  ( $\text{CDCl}_3$ , 125 MHz)  $\delta$  174.9, 173.9, 155.6, 83.7, 68.0, 61.8, 55.0, 50.8, 50.7, 50.6, 49.0, 44.9, 42.9, 42.5, 40.8, 39.7, 37.1, 34.2, 31.4, 30.3, 28.0, 23.5, 21.0, 20.9, 14.2, 12.4, 12.4. **HRMS** (ESI):  $m/z$ : calculated for  $\text{C}_{31}\text{H}_{49}\text{N}_2\text{O}_6$ :  $[\text{M} + \text{H}]^+$  545.3585, found: 545.3584.

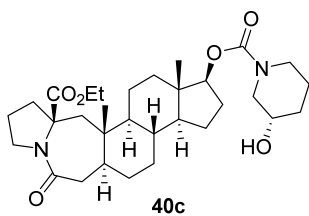

**40c**, white solid, yield: (30.4 mg, 56%).  $^1\text{H NMR}$  ( $\text{CDCl}_3$ , 500 MHz)  $\delta$  4.53 (dd,  $J = 9.0, 7.9$  Hz, 1H), 4.29-4.22 (m, 1H), 4.17-4.11 (m, 1H), 3.78-3.73 (m, 3H), 3.58-3.48 (m, 2H), 3.20-3.13 (m, 2H), 2.77-2.71 (m, 2H), 2.47-2.42 (m, 1H), 2.19-2.12 (m, 1H), 2.05 (d,  $J = 15.5$  Hz, 1H), 2.03-1.98 (m, 1H), 1.90 (m, 1H), 1.80-1.76 (m, 3H), 1.69-1.60 (m, 4H), 1.53-1.42 (m, 5H), 1.37-1.22 (m, 8H), 1.17 (td,  $J = 12.7, 3.7$  Hz, 1H), 1.05-0.99 (m, 1H), 0.90 (td,  $J = 12.6, 4.2$  Hz, 1H), 0.80 (s, 3H), 0.78 (s, 3H), 0.69 (td,  $J = 11.2, 3.7$  Hz, 1H).  $^{13}\text{C NMR}$  ( $\text{CDCl}_3$ , 125 MHz)  $\delta$  174.6, 174.0, 156.0, 83.7, 68.0, 61.7, 55.0, 50.8, 50.7, 50.6, 48.9, 44.9, 42.9, 42.5, 40.9, 39.7, 37.1, 34.2, 31.4, 30.4, 28.0, 23.5, 21.0, 20.9, 14.2, 12.4. **HRMS** (ESI):  $m/z$ : calculated for  $\text{C}_{31}\text{H}_{49}\text{N}_2\text{O}_6$ :  $[\text{M} + \text{H}]^+$  545.3585, found: 545.3585.

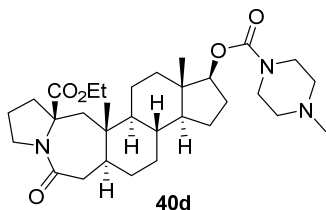

**40d**, white solid, yield: (19.0 mg, 35%). <sup>1</sup>H NMR (CDCl<sub>3</sub>, 500 MHz) δ 4.54 (dd, *J* = 8.9, 7.7 Hz, 1H), 4.29-4.22 (m, 1H), 4.17-4.11 (m, 1H), 3.75 (ddd, *J* = 11.3, 8.6, 2.7 Hz, 1H), 3.54-3.51 (m, 4H), 2.77-2.71 (m, 2H), 2.45 (br, 5H), 2.35 (s, 3H), 2.20-2.12 (m, 1H), 2.06-1.98 (m, 2H), 1.80-1.76 (m, 2H), 1.69-1.57 (m, 4H), 1.53-1.43 (m, 3H), 1.38-1.14 (m, 10H), 1.05-0.99 (m, 1H), 0.90 (td, *J* = 12.6, 4.3 Hz, 1H), 0.80 (s, 3H), 0.77 (s, 3H), 0.69 (td, *J* = 11.2, 3.8 Hz, 1H). <sup>13</sup>C NMR (CDCl<sub>3</sub>, 125 MHz) δ 174.5, 174.0, 155.5, 83.7, 67.9, 61.7, 55.0, 54.5, 50.7, 48.9, 45.8, 45.0, 42.9, 42.5, 40.9, 39.7, 37.1, 34.2, 31.4, 30.4, 28.0, 23.5, 21.0, 20.9, 14.2, 12.4, 12.4. HRMS (ESI): *m/z*: calculated for C<sub>31</sub>H<sub>50</sub>N<sub>3</sub>O<sub>5</sub>: [M + H]<sup>+</sup> 544.3745, found: 544.3739.

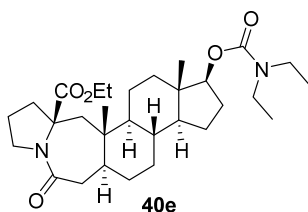

**40e**, white solid, yield: (10.3 mg, 20%). <sup>1</sup>H NMR (CDCl<sub>3</sub>, 500 MHz) δ 4.51 (dd, *J* = 9.3, 7.8 Hz, 1H), 4.28-4.22 (m, 1H), 4.17-4.11 (m, 1H), 3.75 (ddd, *J* = 11.6, 8.5, 3.1 Hz, 1H), 3.54-3.49 (m, 1H), 3.27 (br, 4H), 2.78-2.71 (m, 2H), 2.46-2.42 (m, 1H), 2.22-2.14 (m, 1H), 2.05 (d, *J* = 15.3 Hz, 1H), 2.03-1.98 (m, 1H), 1.80-1.76 (m, 2H), 1.69-1.57 (m, 4H), 1.53-1.43 (m, 3H), 1.38-1.24 (m, 8H), 1.18 (td, *J* = 12.5, 4.0 Hz, 1H), 1.12 (t, *J* = 7.2 Hz, 6H), 1.05-0.99 (m, 1H), 0.90 (td, *J* = 13.0, 3.9 Hz, 1H), 0.80 (s, 3H), 0.78 (s, 3H), 0.69 (td, *J* = 11.2, 3.8 Hz, 1H). <sup>13</sup>C NMR (CDCl<sub>3</sub>, 100 MHz) δ 174.5, 174.0, 156.0, 83.2, 67.9, 61.6, 55.0, 50.6, 48.8, 44.9, 42.9, 42.4, 40.9, 39.7, 37.1, 34.2, 31.4, 30.3, 28.0, 23.5, 20.9, 20.8, 14.1, 12.4, 12.3. HRMS (ESI): *m/z*: calculated for C<sub>30</sub>H<sub>49</sub>N<sub>2</sub>O<sub>5</sub>: [M + H]<sup>+</sup> 517.3636, found: 517.3631.

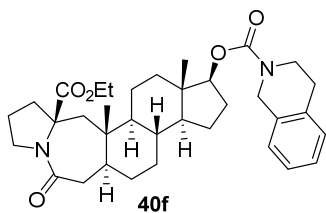

**40f**, white solid, yield: (25.3 mg, 44%). <sup>1</sup>H NMR (CDCl<sub>3</sub>, 500 MHz) δ 7.21-7.13 (m, 4H), 4.61 (s, 2H), 4.58 (d, *J* = 8.1 Hz, 1H), 4.29-4.22 (m, 1H), 4.17-4.11 (m, 1H), 3.75 (ddd, *J* = 11.2, 8.1, 3.0 Hz, 1H), 3.69 (br, 2H), 3.55-3.49 (m, 1H), 2.85 (br, 2H), 2.78-2.72 (m, 2H), 2.47-2.42 (m, 1H), 2.23-2.15 (m, 1H), 2.07 (d, *J* = 15.2 Hz, 1H), 2.03-1.98 (m, 1H), 1.80-1.76 (m, 2H), 1.69-1.57 (m, 4H), 1.55-1.43 (m, 3H), 1.38-1.25 (m, 8H), 1.18 (td, *J* = 13.0, 3.5 Hz, 1H), 1.07-1.01 (m, 1H), 0.90 (td, *J* = 12.7, 3.8 Hz, 1H), 0.82 (s, 3H), 0.80 (s, 3H), 0.70 (td, *J* = 11.2, 3.7 Hz, 1H). <sup>13</sup>C NMR (CDCl<sub>3</sub>, 125 MHz) δ 174.8, 173.9, 155.8, 126.5, 126.3, 68.0, 61.8, 55.0, 50.7, 50.6, 49.0, 45.7, 44.9,

42.9, 42.5, 40.8, 39.7, 37.1, 34.2, 31.4, 30.4, 28.1, 23.5, 21.0, 20.9, 14.2, 12.4, 12.4. **HRMS** (ESI):  $m/z$ : calculated for  $C_{35}H_{49}N_2O_5$ :  $[M + H]^+$  577.3636, found: 577.3646.

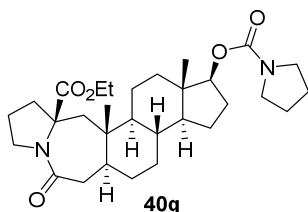

**40g**, white solid, yield: (37.5 mg, 37%). **<sup>1</sup>H NMR** (CDCl<sub>3</sub>, 500 MHz)  $\delta$  4.53 (td,  $J = 9.3, 7.9$  Hz, 1H), 4.29-4.22 (m, 1H), 4.17-4.11 (m, 1H), 3.75 (ddd,  $J = 11.4, 8.6, 3.1$  Hz, 1H), 3.55-3.49 (m, 1H), 3.39-3.43 (m, 4H), 2.78-2.72 (m, 2H), 2.47-2.42 (m, 1H), 2.21-2.13 (m, 1H), 2.06 (d,  $J = 14.7$  Hz, 1H), 2.03-1.98 (m, 1H), 1.88-1.83 (m, 4H), 1.79-1.77 (m, 2H), 1.69-1.57 (m, 4H), 1.54-1.43 (m, 3H), 1.37-1.24 (m, 8H), 1.17 (td,  $J = 12.9, 3.6$  Hz, 1H), 1.05-0.99 (m, 1H), 0.90 (td,  $J = 12.8, 4.3$  Hz, 1H), 0.80 (s, 3H), 0.78 (s, 3H), 0.69 (td,  $J = 11.2, 3.8$  Hz, 1H). **<sup>13</sup>C NMR** (CDCl<sub>3</sub>, 125 MHz)  $\delta$  174.8, 173.9, 155.3, 83.1, 68.0, 61.7, 55.0, 50.7, 50.6, 49.0, 46.1, 45.8, 44.9, 42.9, 42.4, 40.8, 39.7, 37.1, 34.2, 31.4, 30.4, 28.2, 25.8, 25.1, 23.5, 21.0, 20.9, 14.2, 12.4, 12.2. **HRMS** (ESI):  $m/z$ : calculated for  $C_{30}H_{47}N_2O_5$ :  $[M + H]^+$  515.3479, found: 515.3485.

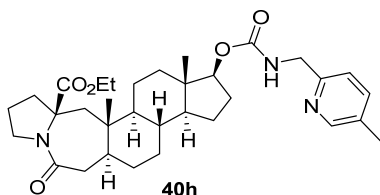

**40h**, white solid, yield: (30.5 mg, 54%). **<sup>1</sup>H NMR** (CDCl<sub>3</sub>, 500 MHz)  $\delta$  8.39 (d,  $J = 5.0$  Hz, 1H), 7.09 (s, 1H), 7.02 (d,  $J = 5.3$  Hz, 1H), 5.73 (t,  $J = 4.7$  Hz, 1H), 4.56 (t,  $J = 8.5$  Hz, 1H), 4.43 (t,  $J = 4.8$  Hz, 2H), 4.29-4.22 (m, 1H), 4.17-4.10 (m, 1H), 3.75 (ddd,  $J = 11.4, 8.5, 2.9$  Hz, 1H), 3.54-3.50 (m, 1H), 2.77-2.71 (m, 2H), 2.46-2.42 (m, 1H), 2.35 (s, 3H), 2.19-2.11 (m, 1H), 2.05 (d,  $J = 15.4$  Hz, 1H), 2.03-1.98 (m, 1H), 1.86-1.74 (m, 2H), 1.68-1.57 (m, 4H), 1.54-1.42 (m, 3H), 1.37-1.25 (m, 8H), 1.17 (td,  $J = 12.7, 3.2$  Hz, 1H), 1.04-0.98 (m, 1H), 0.90 (td,  $J = 12.6, 4.1$  Hz, 1H), 0.79 (s, 3H), 0.77 (s, 3H), 0.68 (td,  $J = 11.0, 3.5$  Hz, 1H). **<sup>13</sup>C NMR** (CDCl<sub>3</sub>, 125 MHz)  $\delta$  174.5, 174.0, 156.9, 156.8, 148.9, 148.0, 123.4, 122.7, 83.3, 67.9, 61.7, 55.0, 50.7, 50.7, 48.9, 46.0, 45.0, 42.9, 42.4, 41.0, 39.7, 37.1, 34.2, 31.4, 30.4, 27.8, 23.5, 21.1, 21.0, 20.9, 14.2, 12.4, 12.2. **HRMS** (ESI):  $m/z$ : calculated for  $C_{33}H_{48}N_3O_5$ :  $[M + H]^+$  566.3588, found: 566.3584.

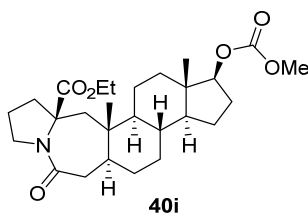

**40i**, white solid, yield: (34.2 mg, 72%). **<sup>1</sup>H NMR** (CDCl<sub>3</sub>, 500 MHz)  $\delta$  4.49 (dd,  $J = 8.9, 8.0$  Hz, 1H), 4.29-4.22 (m, 1H), 4.17-4.11 (m, 1H), 3.77 (s, 3H), 3.76-3.73 (m, 1H), 3.54-3.48 (m, 1H),

2.78-2.72 (m, 2H), 2.47-2.42 (m, 1H), 2.23-2.16 (m, 1H), 2.05 (d,  $J = 15.1$  Hz, 1H), 2.02-1.97 (m, 1H), 1.87-1.75 (m, 2H), 1.71-1.58 (m, 5H), 1.55-1.43 (m, 2H), 1.39-1.25 (m, 8H), 1.17 (td,  $J = 12.9$ , 4.0 Hz, 1H), 1.05-0.99 (m, 1H), 0.90 (td,  $J = 12.5$ , 4.2 Hz, 1H), 0.80 (s, 3H), 0.80 (s, 3H), 0.69 (td,  $J = 11.2$ , 3.9 Hz, 1H).  $^{13}\text{C}$  NMR (CDCl<sub>3</sub>, 125 MHz)  $\delta$  174.6, 173.9, 155.9, 86.5, 67.9, 61.7, 55.0, 54.6, 50.6, 48.9, 44.9, 42.9, 42.4, 40.9, 39.7, 37.0, 34.1, 31.4, 30.3, 27.5, 23.4, 20.9, 20.9, 14.2, 12.4, 12.1. HRMS (ESI):  $m/z$ : calculated for C<sub>27</sub>H<sub>42</sub>NO<sub>6</sub>: [M + H]<sup>+</sup> 476.3007, found: 476.3013.

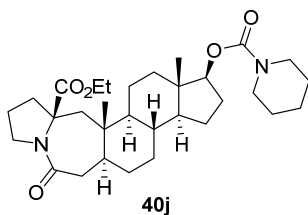

**40j**, white solid, yield: (20.5 mg, 39%).  $^1\text{H}$  NMR (CDCl<sub>3</sub>, 500 MHz)  $\delta$  4.53 (dd,  $J = 9.3$ , 8.1 Hz, 1H), 4.28-4.22 (m, 1H), 4.17-4.11 (m, 1H), 3.76 (ddd,  $J = 11.7$ , 8.1, 2.7 Hz, 1H), 3.54-3.49 (m, 1H), 3.40 (t,  $J = 5.3$  Hz, 4H), 2.77-2.71 (m, 2H), 2.46-2.42 (m, 1H), 2.20-2.12 (m, 1H), 2.05 (d,  $J = 15.1$  Hz, 1H), 2.03-1.98 (m, 1H), 1.80-1.76 (m, 3H), 1.69-1.58 (m, 5H), 1.52-1.42 (m, 6H), 1.37-1.25 (m, 9H), 1.17 (td,  $J = 12.9$ , 3.6 Hz, 1H), 1.05-0.99 (m, 1H), 0.90 (td,  $J = 12.1$ , 4.0 Hz, 1H), 0.80 (s, 3H), 0.77 (s, 3H), 0.69 (td,  $J = 11.3$ , 4.0 Hz, 1H).  $^{13}\text{C}$  NMR (CDCl<sub>3</sub>, 125 MHz)  $\delta$  174.4, 174.0, 155.6, 83.2, 67.9, 61.6, 55.0, 50.6, 48.8, 44.9, 44.8, 42.9, 42.4, 40.9, 39.7, 37.1, 34.2, 31.4, 30.5, 30.3, 28.0, 24.5, 23.5, 20.9, 20.8, 14.1, 12.4, 12.3. HRMS (ESI):  $m/z$ : calculated for C<sub>31</sub>H<sub>49</sub>N<sub>2</sub>O<sub>5</sub>: [M + H]<sup>+</sup> 529.3636, found: 529.3640.

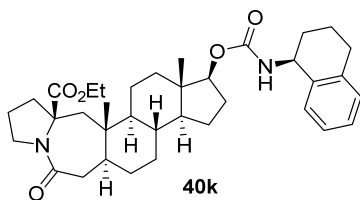

**40k**, white solid, yield: (15.3 mg, 26%).  $^1\text{H}$  NMR (CDCl<sub>3</sub>, 500 MHz)  $\delta$  7.32 (dd,  $J = 6.0$ , 4.5 Hz, 1H), 7.17 (dd,  $J = 5.5$ , 3.9 Hz, 2H), 7.09 (dd,  $J = 5.3$ , 3.5 Hz, 1H), 4.88 (s, 2H), 4.57 (t,  $J = 8.4$  Hz, 1H), 4.28-4.22 (m, 1H), 4.17-4.10 (m, 1H), 3.75 (ddd,  $J = 11.5$ , 8.5, 3.0 Hz, 1H), 3.54-3.49 (m, 1H), 2.80-2.71 (m, 4H), 2.47-2.42 (m, 1H), 2.23-2.15 (m, 1H), 2.05 (d,  $J = 15.0$  Hz, 1H), 2.04-1.99 (m, 1H), 1.84-1.77 (m, 5H), 1.69-1.59 (m, 4H), 1.53-1.43 (m, 3H), 1.34-1.20 (m, 10H), 1.06-1.00 (m, 1H), 0.90 (td,  $J = 12.9$ , 4.1 Hz, 1H), 0.79 (s, 3H), 0.73 (s, 3H), 0.73-0.67 (m, 1H).  $^{13}\text{C}$  NMR (CDCl<sub>3</sub>, 125 MHz)  $\delta$  174.7, 174.0, 156.3, 137.5, 137.0, 129.2, 128.8, 127.3, 126.3, 83.1, 68.0, 61.7, 55.0, 50.7, 50.6, 49.1, 49.0, 45.0, 42.9, 42.4, 40.9, 39.7, 37.2, 34.2, 31.4, 30.5, 30.4, 29.3, 27.9, 23.5, 21.0, 20.9, 19.9, 14.2, 12.4, 12.2. HRMS (ESI):  $m/z$ : calculated for C<sub>36</sub>H<sub>51</sub>N<sub>2</sub>O<sub>5</sub>: [M + H]<sup>+</sup> 591.3792, found: 591.3802.

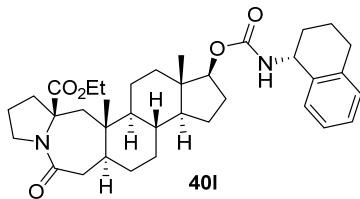

**401**, white solid, yield: (15.3 mg, 26%).  $^1\text{H NMR}$  ( $\text{CDCl}_3$ , 500 MHz)  $\delta$  7.33 (dd,  $J = 5.7, 3.8$  Hz, 1H), 7.18 (dd,  $J = 5.7, 3.5$  Hz, 2H), 7.09 (dd,  $J = 5.4, 3.6$  Hz, 1H), 4.88 (s, 2H), 4.59 (t,  $J = 8.5$  Hz, 1H), 4.29-4.22 (m, 1H), 4.17-4.11 (m, 1H), 3.76 (ddd,  $J = 11.3, 8.1, 2.7$  Hz, 1H), 3.55-3.49 (m, 1H), 2.82-2.72 (m, 4H), 2.47-2.43 (m, 1H), 2.21-2.13 (m, 1H), 2.05 (d,  $J = 15.2$  Hz, 1H), 2.04-1.99 (m, 1H), 1.83-1.76 (m, 5H), 1.71-1.57 (m, 4H), 1.53-1.43 (m, 3H), 1.34-1.22 (m, 10H), 1.06-1.00 (m, 1H), 0.91 (td,  $J = 12.7, 4.0$  Hz, 1H), 0.80 (s, 3H), 0.74 (s, 3H), 0.74-0.68 (m, 1H).  $^{13}\text{C NMR}$  ( $\text{CDCl}_3$ , 125 MHz)  $\delta$  174.8, 173.9, 156.4, 137.6, 137.1, 129.2, 128.7, 127.3, 126.2, 83.1, 68.0, 61.8, 55.0, 50.7, 50.6, 49.1, 49.0, 44.9, 42.9, 42.5, 40.8, 39.7, 37.2, 34.2, 31.4, 30.5, 30.4, 29.3, 27.8, 23.5, 21.0, 20.9, 19.9, 14.2, 12.4, 12.2. **HRMS** (ESI):  $m/z$ : calculated for  $\text{C}_{36}\text{H}_{51}\text{N}_2\text{O}_5$ :  $[\text{M} + \text{H}]^+$  591.3792, found: 591.3778.

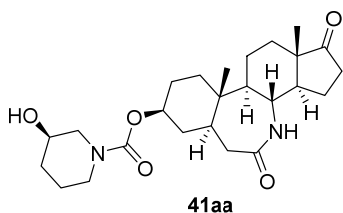

**41aa**, white solid, yield: (39.2 mg, 88%).  $^1\text{H NMR}$  ( $\text{CDCl}_3$ , 500 MHz)  $\delta$  6.60 (s, 1H), 4.59-4.53 (m, 1H), 3.75-3.73 (m, 2H), 3.51 (td,  $J = 10.1, 4.1$  Hz, 2H), 3.18-3.12 (m, 2H), 2.72 (dd,  $J = 14.4, 10.3$  Hz, 1H), 2.56-2.51 (m, 1H), 2.25-2.16 (m, 2H), 1.95-1.76 (m, 9H), 1.63-1.36 (m, 8H), 1.31-1.23 (m, 2H), 1.16 (td,  $J = 13.6, 2.9$  Hz, 1H), 1.05 (s, 3H), 0.88 (s, 3H).  $^{13}\text{C NMR}$  ( $\text{CDCl}_3$ , 125 MHz)  $\delta$  218.8, 178.6, 155.4, 73.3, 53.6, 51.7, 50.7, 49.3, 47.5, 41.5, 39.7, 39.0, 37.3, 36.9, 35.7, 30.6, 27.5, 22.4, 21.8, 13.4, 12.8. **HRMS** (ESI):  $m/z$ : calculated for  $\text{C}_{25}\text{H}_{38}\text{N}_2\text{NaO}_5$ :  $[\text{M} + \text{Na}]^+$  469.2673, found: 469.2667.

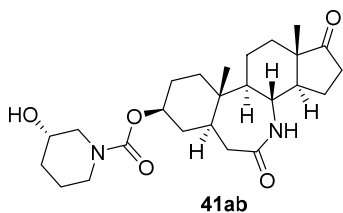

**41ab**, white solid, yield: (16.5 mg, 37%).  $^1\text{H NMR}$  ( $\text{CDCl}_3$ , 500 MHz)  $\delta$  6.20 (s, 1H), 4.59-4.52 (m, 1H), 3.75-3.73 (m, 2H), 3.51 (td,  $J = 10.0, 4.1$  Hz, 2H), 3.18-3.12 (m, 2H), 2.71 (dd,  $J = 14.4, 10.3$  Hz, 1H), 2.58-2.51 (m, 1H), 2.23-2.15 (m, 2H), 1.95-1.76 (m, 9H), 1.67-1.35 (m, 8H), 1.31-1.22 (m, 2H), 1.16 (td,  $J = 13.8, 3.3$  Hz, 1H), 1.04 (s, 3H), 0.88 (s, 3H).  $^{13}\text{C NMR}$  ( $\text{CDCl}_3$ , 125 MHz)  $\delta$  218.7, 178.1, 73.3, 53.8, 51.6, 50.7, 49.4, 47.5, 41.5, 39.6, 39.1, 37.3, 37.0, 35.7, 30.7, 27.5, 22.5, 21.8, 13.4, 12.9. **HRMS** (ESI):  $m/z$ : calculated for  $\text{C}_{25}\text{H}_{38}\text{N}_2\text{NaO}_5$ :  $[\text{M} + \text{Na}]^+$  469.2673, found: 469.2668.

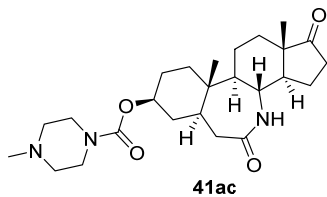

**41ac**, white solid, yield: (12.4 mg, 28%).  $^1\text{H NMR}$  ( $\text{CDCl}_3$ , 500 MHz)  $\delta$  6.50 (s, 1H), 4.61-4.55 (m, 1H), 3.66 (br, 4H), 3.51 (td,  $J = 10.3, 4.1$  Hz, 1H), 2.81 (br, 4H), 2.73 (dd,  $J = 14.4, 10.4$  Hz, 1H), 2.56 (s, 3H), 2.53-2.52 (m, 1H), 2.25-2.16 (m, 2H), 1.97-1.77 (m, 7H), 1.64-1.48 (m, 4H), 1.43-1.35 (m, 1H), 1.31-1.23 (m, 2H), 1.16 (td,  $J = 13.6, 2.9$  Hz, 1H), 1.05 (s, 3H), 0.88 (s, 3H).  $^{13}\text{C NMR}$  ( $\text{CDCl}_3$ , 125 MHz)  $\delta$  218.6, 178.4, 154.5, 73.8, 53.6, 53.4, 51.7, 49.3, 47.5, 44.3, 41.4, 39.6, 39.0, 37.2, 36.9, 35.6, 30.6, 27.4, 22.4, 21.8, 13.4, 12.8. **HRMS** (ESI):  $m/z$ : calculated for  $\text{C}_{25}\text{H}_{40}\text{N}_3\text{O}_4$ :  $[\text{M} + \text{H}]^+$  446.3013, found: 446.3008.

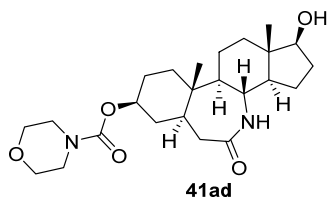

**41ad**, white solid, yield: (26.1 mg, 60%).  $^1\text{H NMR}$  ( $\text{CDCl}_3$ , 500 MHz)  $\delta$  5.65 (s, 1H), 4.60-4.54 (m, 1H), 3.65 (br, 4H), 3.44 (m, 4H), 3.38-3.33 (m, 1H), 2.69 (dd,  $J = 14.4, 10.7$  Hz, 1H), 2.14-2.07 (m, 1H), 1.96-1.74 (m, 9H), 1.58-1.34 (m, 6H), 1.24-1.14 (m, 3H), 1.08 (td,  $J = 13.0, 4.1$  Hz, 1H), 1.01 (s, 3H), 0.76 (s, 3H).  $^{13}\text{C NMR}$  ( $\text{CDCl}_3$ , 125 MHz)  $\delta$  177.7, 155.0, 81.0, 73.5, 53.7, 52.3, 49.1, 42.9, 41.5, 39.5, 39.2, 37.4, 37.0, 35.7, 30.0, 27.5, 24.1, 22.1, 12.9, 10.7. **HRMS** (ESI):  $m/z$ : calculated for  $\text{C}_{24}\text{H}_{38}\text{N}_2\text{NaO}_5$ :  $[\text{M} + \text{Na}]^+$  457.2673, found: 457.2668.

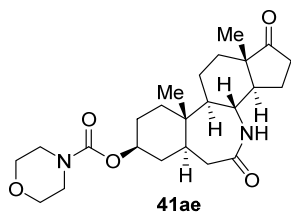

**41ae**, Yellow oil. Yield: (27.6 mg, 64%).  $^1\text{H NMR}$  (500 MHz,  $\text{CDCl}_3$ )  $\delta$  5.79 (s, 1H), 4.66 – 4.43 (m, 1H), 3.65 (s, 3H), 3.54 – 3.39 (m, 3H), 2.70 (dd,  $J = 14.4, 10.6$  Hz, 1H), 2.54 (dd,  $J = 17.3, 8.7$  Hz, 1H), 2.18 (q,  $J = 6.4, 5.7$  Hz, 1H), 1.86 (dddd,  $J = 53.6, 31.0, 13.0, 5.5$  Hz, 5H), 1.71 – 1.45 (m, 3H), 1.45 – 1.07 (m, 4H), 1.04 (s, 2H), 0.88 (s, 2H).  $^{13}\text{C NMR}$  (126 MHz,  $\text{CDCl}_3$ )  $\delta$  218.6, 177.3, 154.8, 73.3, 53.9, 51.3, 49.4, 47.4, 41.4, 39.4, 39.2, 37.2, 36.9, 35.6, 30.6, 27.4, 22.4, 21.6, 13.3, 12.8. **HRMS** (ESI)  $m/z$ : anal. calculated for  $[\text{C}_{24}\text{H}_{36}\text{N}_2\text{O}_5 + \text{H}]^+$ : 433.2697, found: 433.2691.

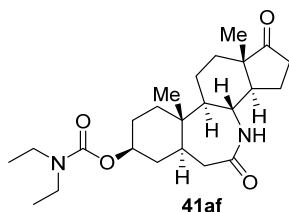

**41af**, Yellow oil. Yield: (27.1 mg, 65%).  $^1\text{H NMR}$  (500 MHz,  $\text{CDCl}_3$ )  $\delta$  5.87 (s, 1H), 4.57 (tt,  $J = 10.9, 4.7$  Hz, 1H), 3.49 (td,  $J = 10.0, 3.9$  Hz, 1H), 3.26 (d,  $J = 14.6$  Hz, 2H), 2.70 (dd,  $J = 14.4, 10.5$  Hz, 1H), 2.62 – 2.46 (m, 1H), 2.26 – 2.11 (m, 2H), 2.01 – 1.72 (m, 8H), 1.69 – 1.44 (m, 4H), 1.44 – 1.32 (m, 1H), 1.26 (tdd,  $J = 14.1, 11.0, 5.2$  Hz, 1H), 1.21 – 1.06 (m, 6H), 1.04 (s, 3H), 0.88 (s, 3H).  $^{13}\text{C NMR}$  (126 MHz,  $\text{CDCl}_3$ )  $\delta$  218.7, 177.3, 155.3, 72.5, 53.9, 51.3, 49.3, 47.5, 41.4, 39.5, 39.2, 37.3, 37.0, 35.6, 30.6, 27.5, 22.4, 21.6, 13.3, 12.8. **HRMS** (ESI)  $m/z$ : anal. calculated for  $[\text{C}_{24}\text{H}_{38}\text{N}_2\text{O}_4 + \text{H}]^+$ : 419.2904, found: 419.2898.

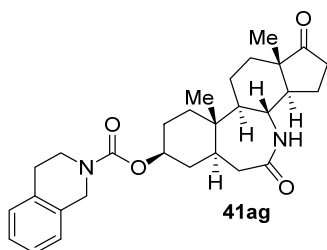

**41ag**, Yellow oil. Yield: (36.8 mg, 77%).  $^1\text{H NMR}$  (500 MHz,  $\text{CDCl}_3$ )  $\delta$  7.24 – 7.02 (m, 4H), 6.42 (s, 1H), 4.60 (t,  $J = 7.4$  Hz, 3H), 3.78 – 3.62 (m, 2H), 3.49 (td,  $J = 10.2, 9.8, 3.9$  Hz, 1H), 2.84 (s, 2H), 2.71 (dd,  $J = 14.4, 10.6$  Hz, 1H), 2.52 (dd,  $J = 19.1, 6.9$  Hz, 1H), 2.36 – 2.03 (m, 3H), 2.01 – 1.75 (m, 6H), 1.74 – 1.38 (m, 5H), 1.28 (ddt,  $J = 17.9, 12.2, 5.9$  Hz, 2H), 1.23 – 1.11 (m, 1H), 1.05 (s, 3H), 0.88 (s, 3H).  $^{13}\text{C NMR}$  (126 MHz,  $\text{CDCl}_3$ )  $\delta$  218.8, 177.5, 154.9, 126.6, 126.5, 126.3, 126.2, 73.1, 53.6, 51.3, 49.0, 47.3, 45.5, 41.3, 39.4, 39.1, 37.1, 36.9, 35.5, 30.4, 27.4, 22.3, 21.6, 13.2, 12.7. **HRMS** (ESI)  $m/z$ : anal. calculated for  $[\text{C}_{29}\text{H}_{38}\text{N}_2\text{O}_4 + \text{H}]^+$ : 479.2904, found: 479.2896.

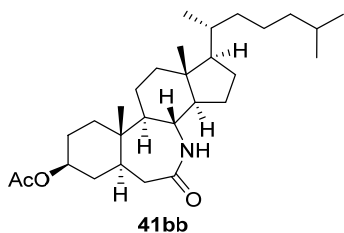

**41bb**, yellow oil, yield: (40.4 mg, 88%),  $^1\text{H NMR}$  (400 MHz,  $\text{CDCl}_3$ )  $\delta$  5.31 (d,  $J = 3.1$  Hz, 1H), 4.65 (tt,  $J = 11.5, 4.8$  Hz, 1H), 3.31 (td,  $J = 10.0, 3.9$  Hz, 1H), 2.68 (dd,  $J = 14.4, 10.3$  Hz, 1H), 2.02 (s, 3H), 2.00 – 1.65 (m, 9H), 1.60 – 1.06 (m, 17H), 1.01 (s, 4H), 0.91 (d,  $J = 6.5$  Hz, 3H), 0.88 (d,  $J = 2.1$  Hz, 3H), 0.86 (d,  $J = 2.1$  Hz, 3H), 0.69 (s, 3H).  $^{13}\text{C NMR}$  (101 MHz,  $\text{CDCl}_3$ )  $\delta$  177.2, 170.4, 72.4, 55.9, 54.4, 53.5, 52.1, 42.4, 41.3, 39.4, 39.2, 39.2, 38.7, 37.2, 36.4, 35.9, 35.5, 28.0, 27.7, 26.9, 25.1, 23.7, 22.8, 22.5, 22.2, 21.3, 18.5, 12.7, 11.6. **HRMS** (ESI)  $m/z$ : anal. calculated for  $[\text{C}_{29}\text{H}_{49}\text{NO}_3 + \text{H}]^+$ : 460.3785, found: 460.3775. LC-MS ( $t_R = 3.60$  min,  $\lambda = 210$  nm, purity >99%).

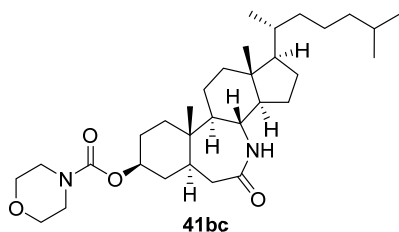

**41bc**, white solid, yield: (21.7 mg, 41%).  $^1\text{H NMR}$  ( $\text{CDCl}_3$ , 500 MHz)  $\delta$  6.56 (s, 1H), 4.61-4.55 (m, 1H), 3.65 (s, 4H), 3.45 (s, 4H), 3.32 (td,  $J = 10.1, 4.0$  Hz, 1H), 2.70 (dd,  $J = 14.3, 10.7$  Hz, 1H), 1.96-1.89 (m, 4H), 1.86-1.81 (m, 3H), 1.79-1.74 (m, 2H), 1.54-1.42 (m, 3H), 1.39-1.28 (m, 7H), 1.21-1.10 (m, 8H), 1.02 (s, 3H), 0.91 (d,  $J = 6.8$  Hz, 3H), 0.87 (d,  $J = 2.8$  Hz, 3H), 0.86 (d,  $J = 2.7$  Hz, 3H), 0.68 (s, 3H).  $^{13}\text{C NMR}$  ( $\text{CDCl}_3$ , 125 MHz)  $\delta$  178.9, 155.0, 73.6, 55.8, 54.1, 52.9, 52.7, 42.5, 41.4, 39.5, 39.4, 38.9, 38.6, 37.2, 36.9, 36.0, 35.6, 28.1, 27.8, 27.5, 25.0, 23.8, 22.9, 22.6, 22.3, 18.7, 12.8, 11.6. **HRMS** (ESI):  $m/z$ : calculated for  $\text{C}_{32}\text{H}_{55}\text{N}_2\text{O}_4$ :  $[\text{M} + \text{H}]^+$  531.4156, found: 531.4163.

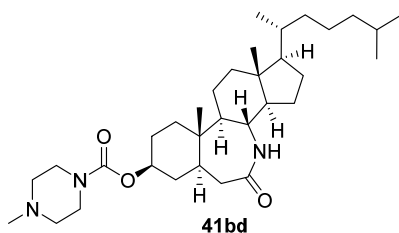

**41bd**, white solid, yield: (20.8 mg, 38%).  $^1\text{H NMR}$  ( $\text{CDCl}_3$ , 500 MHz)  $\delta$  6.18 (s, 1H), 4.60-4.54 (m, 1H), 3.67 (br, 4H), 3.32 (td,  $J = 10.2, 3.8$  Hz, 1H), 2.85 (br, 4H), 2.70 (dd,  $J = 14.3, 10.6$  Hz, 1H), 2.58 (s, 3H), 1.97-1.87 (m, 4H), 1.82-1.73 (m, 5H), 1.54-1.45 (m, 3H), 1.42-1.25 (m, 7H), 1.21-1.10 (m, 8H), 1.02 (s, 3H), 0.91 (d,  $J = 6.6$  Hz, 3H), 0.87 (d,  $J = 2.7$  Hz, 3H), 0.86 (d,  $J = 2.6$  Hz, 3H), 0.68 (s, 3H).  $^{13}\text{C NMR}$  ( $\text{CDCl}_3$ , 125 MHz)  $\delta$  178.4, 154.5, 74.1, 55.9, 54.2, 53.3, 53.1, 52.5, 44.1, 42.5, 41.4, 39.5, 39.4, 39.0, 38.7, 37.2, 36.8, 36.0, 35.6, 28.1, 27.8, 27.4, 25.1, 23.8, 22.9, 22.6, 22.3, 18.7, 12.8, 11.6. **HRMS** (ESI):  $m/z$ : calculated for  $\text{C}_{33}\text{H}_{58}\text{N}_3\text{O}_3$ :  $[\text{M} + \text{H}]^+$  544.4473, found: 544.4467.

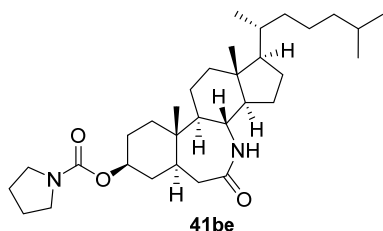

**41be**, white solid, yield: (46.2 mg, 90%).  $^1\text{H NMR}$  ( $\text{CDCl}_3$ , 500 MHz)  $\delta$  6.61 (s, 1H), 4.60-4.53 (m, 1H), 3.37-3.30 (m, 5H), 2.70 (dd,  $J = 14.2, 10.8$  Hz, 1H), 1.96-1.81 (m, 11H), 1.78-1.74 (m, 2H), 1.55-1.44 (m, 3H), 1.42-1.26 (m, 7H), 1.21-1.10 (m, 8H), 1.02 (s, 3H), 0.91 (d,  $J = 6.4$  Hz, 3H), 0.87 (d,  $J = 2.7$  Hz, 3H), 0.86 (d,  $J = 2.7$  Hz, 3H), 0.68 (s, 3H).  $^{13}\text{C NMR}$  ( $\text{CDCl}_3$ , 125 MHz)  $\delta$  179.1, 154.8, 72.8, 55.8, 54.1, 52.9, 52.7, 46.1, 45.8, 42.5, 41.4, 39.5, 39.5, 38.9, 38.6, 37.3, 37.1, 36.0, 35.6, 28.1, 27.8, 27.7, 25.0, 23.8, 22.9, 22.6, 22.3, 18.7, 12.8, 11.6. **HRMS** (ESI):  $m/z$ : calculated for  $\text{C}_{32}\text{H}_{55}\text{N}_2\text{O}_3$ :  $[\text{M} + \text{H}]^+$  515.4207, found: 515.4213.



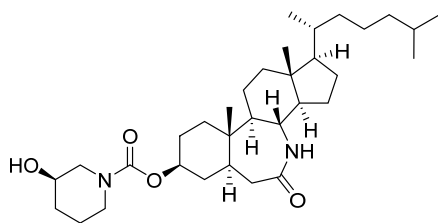

**41bf**

**41bf**, white solid, yield: (51.1 mg, 94%). **<sup>1</sup>H NMR** (CDCl<sub>3</sub>, 500 MHz) δ 6.40 (s, 1H), 4.58-4.53 (m, 1H), 3.76 (d, *J* = 11.8 Hz, 2H), 3.60-3.53 (m, 1H), 3.32 (td, *J* = 9.9, 3.9 Hz, 1H), 3.15 (br, 2H), 2.70 (dd, *J* = 14.0, 10.5 Hz, 1H), 1.96-1.88 (m, 5H), 1.82-1.73 (m, 6H), 1.54-1.44 (m, 5H), 1.39-1.29 (m, 7H), 1.21-1.10 (m, 8H), 1.02 (s, 3H), 0.91 (d, *J* = 6.7 Hz, 3H), 0.87 (d, *J* = 2.7 Hz, 3H), 0.86 (d, *J* = 2.8 Hz, 3H), 0.68 (s, 3H). **<sup>13</sup>C NMR** (CDCl<sub>3</sub>, 125 MHz) δ 178.7, 155.4, 73.5, 55.8, 54.1, 53.0, 52.6, 50.7, 42.5, 41.4, 39.5, 39.4, 38.9, 38.6, 37.2, 36.9, 36.0, 35.6, 29.8, 28.1, 27.8, 27.5, 25.0, 23.8, 22.9, 22.6, 22.3, 18.7, 12.8, 11.6. **HRMS** (ESI): *m/z*: calculated for C<sub>33</sub>H<sub>57</sub>N<sub>2</sub>O<sub>4</sub>: [M + H]<sup>+</sup> 545.4313, found: 545.4309.

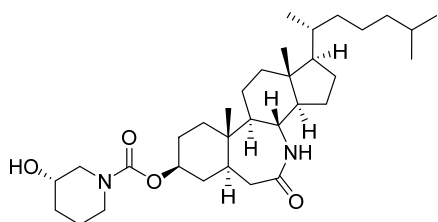

**41bg**

**41bg**, white solid, yield: (46.2 mg, 85%). **<sup>1</sup>H NMR** (CDCl<sub>3</sub>, 500 MHz) δ 6.30 (s, 1H), 4.57-4.53 (m, 1H), 3.75 (d, *J* = 11.0 Hz, 2H), 3.57 (br, 1H), 3.32 (td, *J* = 10.1, 3.6 Hz, 1H), 3.16-3.10 (m, 2H), 2.70 (dd, *J* = 14.2, 10.7 Hz, 1H), 1.96-1.88 (m, 5H), 1.83-1.73 (m, 6H), 1.54-1.45 (m, 5H), 1.38-1.27 (m, 7H), 1.21-1.10 (m, 9H), 1.01 (s, 3H), 0.91 (d, *J* = 6.5 Hz, 3H), 0.87 (d, *J* = 2.5 Hz, 3H), 0.86 (d, *J* = 2.3 Hz, 3H), 0.68 (s, 3H). **<sup>13</sup>C NMR** (CDCl<sub>3</sub>, 125 MHz) δ 178.6, 155.4, 73.5, 55.9, 54.2, 53.0, 52.5, 50.7, 42.5, 41.4, 39.5, 39.4, 39.0, 38.7, 37.3, 36.9, 36.0, 35.6, 29.8, 28.1, 27.8, 27.5, 25.1, 23.8, 22.9, 22.6, 22.3, 18.7, 12.8, 11.6. **HRMS** (ESI): *m/z*: calculated for C<sub>33</sub>H<sub>57</sub>N<sub>2</sub>O<sub>4</sub>: [M + H]<sup>+</sup> 545.4313, found: 545.4324.

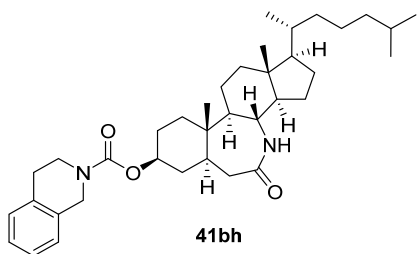

**41bh**

**41bh**, white solid, yield: (46.1 mg, 80%). **<sup>1</sup>H NMR** (CDCl<sub>3</sub>, 500 MHz) δ 7.20-7.14 (m, 4H), 5.66 (s, 1H), 4.64-4.59 (m, 3H), 3.68-3.65 (m, 2H), 3.32 (td, *J* = 9.8, 3.7 Hz, 1H), 2.84 (br, 2H), 2.69 (dd, *J* = 14.2, 10.6 Hz, 1H), 1.97-1.89 (m, 4H), 1.87-1.74 (m, 5H), 1.58-1.47 (m, 3H), 1.42-1.24 (m, 7H), 1.21-1.10 (m, 8H), 1.02 (s, 3H), 0.91 (d, *J* = 6.3 Hz, 3H), 0.87 (d, *J* = 2.4 Hz, 3H), 0.86 (d, *J* = 2.5 Hz, 3H), 0.69 (s, 3H). **<sup>13</sup>C NMR** (CDCl<sub>3</sub>, 125 MHz) δ 177.7, 155.1, 126.5, 126.3, 73.4, 55.9, 54.4,

53.4, 52.3, 45.7, 42.5, 41.4, 39.5, 39.4, 39.2, 38.8, 37.4, 37.0, 36.0, 35.6, 28.1, 27.8, 27.6, 25.1, 23.8, 22.9, 22.6, 22.3, 18.7, 12.9, 11.7. **HRMS** (ESI):  $m/z$ : calculated for  $C_{37}H_{57}N_2O_3$ :  $[M + H]^+$  577.4364, found: 577.4364.

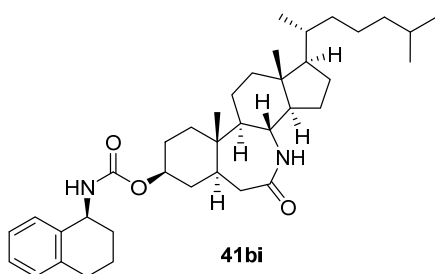

**41bi**, white solid, yield: (38.3 mg, 65%).  **$^1H$  NMR** ( $CDCl_3$ , 500 MHz)  $\delta$  7.32-7.30 (m, 1H), 7.17-7.15 (m, 2H), 7.09-7.07 (m, 1H), 6.62 (s, 1H), 4.87-4.84 (m, 2H), 4.62-4.57 (m, 1H), 3.34-3.30 (m, 1H), 2.82-2.67 (m, 3H), 2.05-2.02 (m, 1H), 1.96-1.92 (m, 4H), 1.83-1.74 (m, 8H), 1.54-1.45 (m, 3H), 1.40-1.27 (m, 7H), 1.22-1.10 (m, 8H), 1.00 (s, 3H), 0.91 (d,  $J = 6.7$  Hz, 3H), 0.87 (d,  $J = 2.8$  Hz, 3H), 0.86 (d,  $J = 2.7$  Hz, 3H), 0.68 (s, 3H).  **$^{13}C$  NMR** ( $CDCl_3$ , 125 MHz)  $\delta$  179.0, 155.6, 137.5, 137.0, 129.2, 128.7, 127.3, 126.2, 72.9, 55.8, 54.1, 52.9, 52.7, 49.2, 42.5, 41.4, 39.5, 39.5, 38.9, 38.6, 37.2, 36.8, 36.0, 35.6, 30.5, 29.3, 28.1, 27.8, 27.5, 25.0, 23.8, 22.9, 22.6, 22.3, 20.0, 18.7, 12.8, 11.6. **HRMS** (ESI):  $m/z$ : calculated for  $C_{38}H_{59}N_2O_3$ :  $[M + H]^+$  591.4520, found: 591.4512.

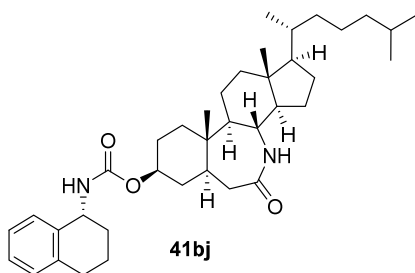

**41bj**, white solid, yield: (47.2 mg, 80%).  **$^1H$  NMR** ( $CDCl_3$ , 500 MHz)  $\delta$  7.34-7.32 (m, 1H), 7.18-7.16 (m, 2H), 7.09-7.07 (m, 1H), 6.25 (s, 1H), 4.88-4.84 (m, 2H), 4.62-4.57 (m, 1H), 3.32 (td,  $J = 10.0, 3.8$  Hz, 1H), 2.82-2.66 (m, 3H), 2.06-2.01 (m, 1H), 1.97-1.92 (m, 4H), 1.84-1.75 (m, 8H), 1.54-1.44 (m, 3H), 1.40-1.26 (m, 7H), 1.21-1.10 (m, 8H), 1.00 (s, 3H), 0.91 (d,  $J = 6.6$  Hz, 3H), 0.87 (d,  $J = 2.7$  Hz, 3H), 0.86 (d,  $J = 2.8$  Hz, 3H), 0.68 (s, 3H).  **$^{13}C$  NMR** ( $CDCl_3$ , 125 MHz)  $\delta$  178.5, 155.6, 137.4, 137.0, 129.1, 128.7, 127.3, 126.3, 72.9, 55.9, 54.2, 53.1, 52.5, 49.1, 42.5, 41.4, 39.5, 39.4, 39.0, 38.7, 37.3, 36.9, 36.0, 35.6, 30.6, 29.3, 28.1, 27.8, 27.5, 25.1, 23.8, 22.9, 22.6, 22.3, 20.0, 18.7, 12.8, 11.6. **HRMS** (ESI):  $m/z$ : calculated for  $C_{38}H_{59}N_2O_3$ :  $[M + H]^+$  591.4520, found: 591.4528.

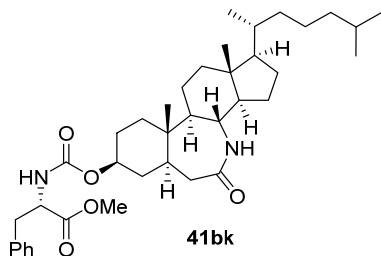

**41bk**, white solid, yield: (36.1 mg, 58%). <sup>1</sup>H NMR (CDCl<sub>3</sub>, 500 MHz) δ 7.31-7.23 (m, 3H), 7.11 (d, *J* = 7.2 Hz, 2H), 5.91 (s, 1H), 5.06 (d, *J* = 8.3 Hz, 1H), 4.63 (q, *J* = 6.6 Hz, 1H), 4.54-4.49 (m, 1H), 3.72 (s, 3H), 3.30 (td, *J* = 10.0, 3.9 Hz, 1H), 3.10 (qd, *J* = 13.9, 5.9 Hz, 2H), 2.68 (dd, *J* = 14.2, 10.5 Hz, 1H), 1.96-1.88 (m, 3H), 1.82-1.70 (m, 6H), 1.54-1.44 (m, 3H), 1.41-1.24 (m, 7H), 1.20-1.06 (m, 8H), 0.98 (s, 3H), 0.91 (d, *J* = 6.3 Hz, 3H), 0.87 (d, *J* = 2.6 Hz, 3H), 0.86 (d, *J* = 2.5 Hz, 3H), 0.68 (s, 3H). <sup>13</sup>C NMR (CDCl<sub>3</sub>, 125 MHz) δ 178.0, 172.2, 155.3, 135.8, 129.3, 128.7, 127.2, 73.3, 55.9, 54.7, 54.3, 53.2, 52.4, 52.4, 42.5, 41.4, 39.5, 39.3, 39.1, 38.7, 38.3, 37.2, 36.7, 36.0, 35.6, 28.1, 27.8, 27.5, 25.1, 23.8, 22.9, 22.6, 22.3, 18.7, 12.8, 11.6. HRMS (ESI): *m/z*: calculated for C<sub>38</sub>H<sub>59</sub>N<sub>2</sub>O<sub>5</sub>: [M + H]<sup>+</sup> 623.4418, found: 623.4428.

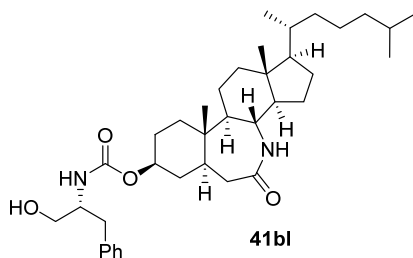

**41bl**, white solid, yield: (39.7 mg, 67%). <sup>1</sup>H NMR (CDCl<sub>3</sub>, 500 MHz) δ 7.31-7.28 (m, 2H), 7.24-7.17 (m, 3H), 6.17 (s, 1H), 4.98 (d, *J* = 6.6 Hz, 1H), 4.52-4.48 (m, 1H), 3.90 (s, 1H), 3.67 (dd, *J* = 11.2, 2.7 Hz, 1H), 3.57 (dd, *J* = 11.1, 4.9 Hz, 1H), 3.31 (td, *J* = 10.2, 3.9 Hz, 1H), 2.86 (d, *J* = 6.1 Hz, 2H), 2.68 (dd, *J* = 14.2, 10.8 Hz, 1H), 1.96-1.88 (m, 3H), 1.83-1.70 (m, 6H), 1.54-1.41 (m, 3H), 1.38-1.25 (m, 7H), 1.22-1.07 (m, 9H), 0.99 (s, 3H), 0.91 (d, *J* = 6.4 Hz, 3H), 0.87 (d, *J* = 2.6 Hz, 3H), 0.86 (d, *J* = 2.5 Hz, 3H), 0.68 (s, 3H). <sup>13</sup>C NMR (CDCl<sub>3</sub>, 125 MHz) δ 178.5, 156.2, 137.8, 129.4, 128.6, 126.6, 73.1, 64.0, 55.9, 54.2, 53.1, 52.5, 42.5, 41.4, 39.5, 39.4, 39.0, 38.7, 37.2, 36.0, 35.6, 28.1, 27.8, 27.4, 25.1, 23.8, 22.9, 22.6, 22.3, 18.7, 12.8, 11.6. HRMS (ESI): *m/z*: calculated for C<sub>37</sub>H<sub>59</sub>N<sub>2</sub>O<sub>4</sub>: [M + H]<sup>+</sup> 595.4469, found: 595.4475.

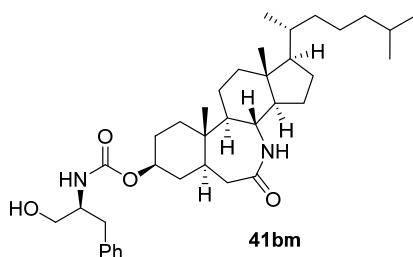

**41bm**, white solid, yield: (27.3 mg, 46%). <sup>1</sup>H NMR (CDCl<sub>3</sub>, 500 MHz) δ 7.32-7.29 (m, 2H), 7.24-7.17 (m, 3H), 6.15 (s, 1H), 4.89 (d, *J* = 7.1 Hz, 1H), 4.53-4.47 (m, 1H), 3.91 (s, 1H), 3.67 (dd, *J* = 11.2, 2.2 Hz, 1H), 3.57 (dd, *J* = 11.1, 5.0 Hz, 1H), 3.31 (td, *J* = 10.2, 4.1 Hz, 1H), 2.86 (d, *J* = 7.0 Hz, 2H), 2.68 (dd, *J* = 14.3, 10.6 Hz, 1H), 1.96-1.89 (m, 4H), 1.84-1.69 (m, 6H), 1.55-1.41 (m, 3H), 1.38-1.26 (m, 7H), 1.22-1.10 (m, 8H), 0.99 (s, 3H), 0.91 (d, *J* = 6.4 Hz, 3H), 0.87 (d, *J* = 2.8 Hz, 3H), 0.86 (d, *J* = 2.8 Hz, 3H), 0.68 (s, 3H). <sup>13</sup>C NMR (CDCl<sub>3</sub>, 125 MHz) δ 178.4, 156.2, 137.7, 129.3, 128.7, 126.7, 73.1, 64.2, 55.9, 54.2, 53.1, 52.5, 42.5, 41.4, 39.5, 39.4, 39.0, 38.6, 37.2, 36.8, 36.0, 35.6, 28.1, 27.8, 25.1, 23.8, 22.9, 22.6, 22.3, 18.7, 12.8, 11.6. HRMS (ESI): *m/z*: calculated for C<sub>37</sub>H<sub>59</sub>N<sub>2</sub>O<sub>4</sub>: [M + H]<sup>+</sup> 595.4469, found: 595.4484.

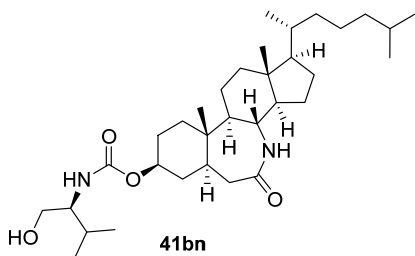

**41bn**, white solid, yield: (30.6 mg, 56%).  $^1\text{H NMR}$  ( $\text{CDCl}_3$ , 500 MHz)  $\delta$  5.95 (s, 1H), 4.80 (d,  $J$  = 8.4 Hz, 1H), 4.54-4.51 (m, 1H), 3.71 (dd,  $J$  = 11.0, 2.8 Hz, 1H), 3.63 (dd,  $J$  = 10.9, 6.5 Hz, 1H), 3.48-3.47 (m, 1H), 3.31 (td,  $J$  = 10.1, 4.0 Hz, 1H), 2.68 (dd,  $J$  = 14.4, 10.6 Hz, 1H), 1.97-1.72 (m, 10H), 1.54-1.45 (m, 3H), 1.40-1.26 (m, 7H), 1.20-1.10 (m, 9H), 1.00 (s, 3H), 0.95 (d,  $J$  = 6.7 Hz, 3H), 0.93 (d,  $J$  = 6.8 Hz, 3H), 0.91 (d,  $J$  = 6.4 Hz, 3H), 0.87 (d,  $J$  = 2.7 Hz, 3H), 0.86 (d,  $J$  = 2.6 Hz, 3H), 0.68 (s, 3H).  $^{13}\text{C NMR}$  ( $\text{CDCl}_3$ , 125 MHz)  $\delta$  178.1, 156.9, 73.1, 64.1, 58.5, 55.9, 54.3, 53.2, 52.4, 42.5, 41.4, 39.5, 39.4, 39.1, 38.7, 37.3, 36.8, 36.0, 35.6, 28.1, 27.8, 27.4, 25.1, 23.8, 22.9, 22.6, 22.3, 19.6, 18.7, 12.8, 11.6. **HRMS** (ESI):  $m/z$ : calculated for  $\text{C}_{33}\text{H}_{59}\text{N}_2\text{O}_4$ :  $[\text{M} + \text{H}]^+$  547.4469, found: 547.4474.

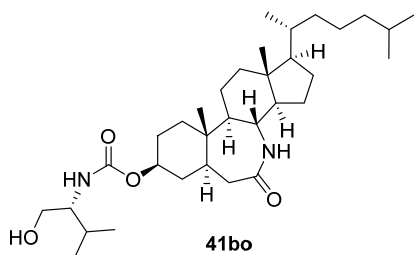

**41bo**, white solid, yield: (43.6 mg, 80%).  $^1\text{H NMR}$  ( $\text{CDCl}_3$ , 500 MHz)  $\delta$  6.58 (s, 1H), 4.83 (d,  $J$  = 8.5 Hz, 1H), 4.56-4.51 (m, 1H), 3.71 (dd,  $J$  = 11.0, 3.0 Hz, 1H), 3.64 (dd,  $J$  = 10.6, 5.9 Hz, 1H), 3.46 (m, 1H), 3.32 (td,  $J$  = 10.2, 4.2 Hz, 1H), 2.70 (dd,  $J$  = 14.1, 10.5 Hz, 1H), 1.97-1.71 (m, 10H), 1.54-1.44 (m, 3H), 1.41-1.26 (m, 7H), 1.21-1.10 (m, 9H), 1.01 (s, 3H), 0.96 (d,  $J$  = 7.0 Hz, 3H), 0.93 (d,  $J$  = 6.8 Hz, 3H), 0.91 (d,  $J$  = 6.5 Hz, 3H), 0.87 (d,  $J$  = 2.8 Hz, 3H), 0.86 (d,  $J$  = 2.7 Hz, 3H), 0.68 (s, 3H).  $^{13}\text{C NMR}$  ( $\text{CDCl}_3$ , 125 MHz)  $\delta$  179.0, 156.9, 73.1, 64.0, 58.5, 55.8, 54.1, 52.9, 52.7, 42.5, 41.4, 39.5, 39.4, 38.8, 38.6, 37.2, 36.7, 36.0, 35.6, 28.1, 27.8, 27.4, 25.0, 23.8, 22.9, 22.6, 22.3, 19.6, 18.7, 12.8, 11.6. **HRMS** (ESI):  $m/z$ : calculated for  $\text{C}_{33}\text{H}_{59}\text{N}_2\text{O}_4$ :  $[\text{M} + \text{H}]^+$  547.4469, found: 547.4478.

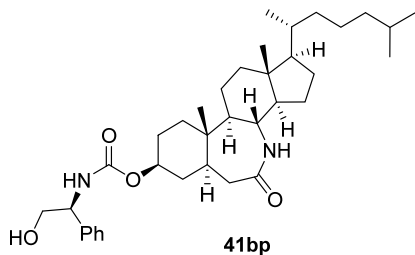

**41bp**, white solid, yield: (25.5 mg, 44%).  $^1\text{H NMR}$  ( $\text{CDCl}_3$ , 500 MHz)  $\delta$  7.37-7.34 (m, 2H), 7.30-7.28 (m, 3H), 5.98 (s, 1H), 5.45 (s, 3H), 4.81 (s, 1H), 4.52 (m, 1H), 3.85 (m, 2H), 3.32-3.28 (m, 1H), 2.67 (dd,  $J$  = 13.9, 10.8 Hz, 1H), 1.96-1.68 (m, 4H), 1.80-1.68 (m, 5H), 1.54-1.43 (m, 3H), 1.40-

1.23 (m, 7H), 1.18-1.10 (m, 8H), 0.98 (s, 3H), 0.91 (d,  $J = 6.3$  Hz, 3H), 0.87 (d,  $J = 2.6$  Hz, 3H), 0.86 (d,  $J = 2.4$  Hz, 3H), 0.68 (s, 3H).  $^{13}\text{C NMR}$  ( $\text{CDCl}_3$ , 125 MHz)  $\delta$  178.2, 156.2, 128.9, 127.9, 126.6, 73.4, 55.9, 54.3, 53.1, 52.4, 42.5, 41.4, 39.5, 39.3, 39.0, 38.7, 37.2, 36.8, 36.0, 35.6, 28.1, 27.8, 25.1, 23.8, 22.9, 22.6, 22.3, 18.7, 12.8, 11.6. **HRMS** (ESI):  $m/z$ : calculated for  $\text{C}_{36}\text{H}_{57}\text{N}_2\text{O}_4$ :  $[\text{M} + \text{H}]^+$  581.4313, found: 581.4304.

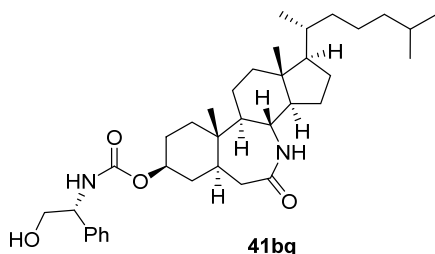

**41bq**, white solid, yield: (15.1 mg, 26%).  $^1\text{H NMR}$  ( $\text{CDCl}_3$ , 500 MHz)  $\delta$  7.37-7.34 (m, 2H), 7.30-7.29 (m, 3H), 6.00 (s, 1H), 5.38 (s, 3H), 4.83 (s, 1H), 4.54 (m, 1H), 3.87 (m, 2H), 3.32-3.29 (m, 1H), 2.70-2.66 (m, 1H), 1.96-1.72 (m, 9H), 1.55-1.43 (m, 3H), 1.40-1.27 (m, 6H), 1.20-1.10 (m, 8H), 0.99 (s, 3H), 0.91 (d,  $J = 6.3$  Hz, 3H), 0.87 (d,  $J = 2.6$  Hz, 3H), 0.86 (d,  $J = 2.6$  Hz, 3H), 0.68 (s, 3H).  $^{13}\text{C NMR}$  ( $\text{CDCl}_3$ , 125 MHz)  $\delta$  178.2, 156.1, 128.9, 127.9, 126.6, 73.3, 55.9, 54.3, 53.2, 52.4, 42.5, 41.4, 39.5, 39.3, 39.0, 38.7, 37.2, 36.8, 36.0, 35.6, 28.1, 27.8, 27.4, 25.1, 23.8, 22.9, 22.6, 22.3, 18.7, 12.8, 11.6. **HRMS** (ESI):  $m/z$ : calculated for  $\text{C}_{36}\text{H}_{57}\text{N}_2\text{O}_4$ :  $[\text{M} + \text{H}]^+$  581.4313, found: 581.4303.

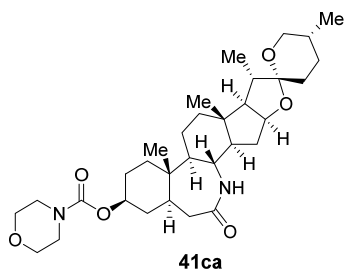

**41ca**, yield: (45.2 mg, 81%).  $^1\text{H NMR}$  (500 MHz,  $\text{CDCl}_3$ )  $\delta$  5.96 – 5.67 (m, 1H), 4.53 (dt,  $J = 11.5$ , 6.4 Hz, 1H), 4.36 (d,  $J = 6.8$  Hz, 1H), 3.76 – 3.53 (m, 4H), 3.53 – 3.12 (m, 6H), 2.67 (dd,  $J = 14.3$ , 10.5 Hz, 1H), 2.13 (t,  $J = 7.4$  Hz, 1H), 1.97 – 1.69 (m, 8H), 1.69 – 1.52 (m, 5H), 1.52 – 1.25 (m, 6H), 1.23 – 1.04 (m, 3H), 1.00 (s, 3H), 0.93 (d,  $J = 5.9$  Hz, 3H), 0.76 (d,  $J = 6.4$  Hz, 3H), 0.74 (s, 3H).  $^{13}\text{C NMR}$  (126 MHz,  $\text{CDCl}_3$ )  $\delta$  177.0, 154.7, 109.1, 79.5, 73.4, 66.8, 66.5, 61.7, 53.8, 53.2, 51.0, 43.9, 41.6, 41.3, 38.0, 39.3, 39.2, 38.6, 37.0, 36.8, 32.3, 31.2, 30.1, 28.6, 27.3, 22.0, 17.0, 15.8, 14.3, 12.6. **HRMS** (ESI)  $m/z$ : anal. calculated for  $[\text{C}_{32}\text{H}_{50}\text{N}_2\text{O}_6 + \text{Na}]^+$ : 581.3561, found: 581.3553. LC-MS ( $t_{\text{R}} = 3.21$  min,  $\lambda = 210$  nm, purity 91%).

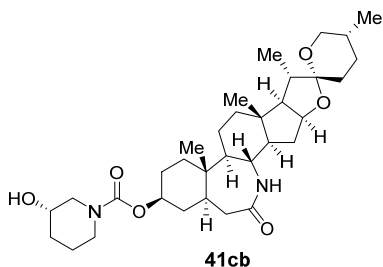

**41cb**, yield: (44.0 mg, 77%).  $^1\text{H NMR}$  (400 MHz,  $\text{CDCl}_3$ )  $\delta$  5.61 – 5.37 (m, 1H), 4.53 (ddd,  $J$  = 11.4, 8.8, 4.6 Hz, 1H), 4.38 (q,  $J$  = 7.0 Hz, 1H), 3.82 – 3.63 (m, 2H), 3.60 (d,  $J$  = 29.3 Hz, 1H), 3.45 (dt,  $J$  = 13.8, 6.9 Hz, 2H), 3.35 (t,  $J$  = 10.9 Hz, 1H), 3.09 (dt,  $J$  = 26.8, 9.6 Hz, 2H), 2.68 (dd,  $J$  = 14.3, 10.5 Hz, 1H), 2.14 (ddd,  $J$  = 11.3, 7.4, 4.3 Hz, 1H), 1.95 – 1.05 (m, 30H), 1.02 (s, 3H), 0.78 (d,  $J$  = 6.2 Hz, 3H), 0.76 (s, 3H).  $^{13}\text{C NMR}$  (101 MHz,  $\text{CDCl}_3$ )  $\delta$  177.1, 155.2, 109.2, 79.5, 73.2, 66.8, 66.0, 61.8, 43.9, 41.7, 41.4, 40.0, 39.3, 39.2, 38.7, 37.1, 36.9, 32.4, 31.2, 30.2, 28.7, 27.4, 22.3, 22.1, 17.0, 15.9, 14.4, 12.6. **HRMS** (ESI)  $m/z$ : anal. calculated for  $[\text{C}_{33}\text{H}_{52}\text{N}_2\text{O}_6 + \text{H}]^+$  : 573.3898, found: 573.3889. LC-MS ( $t_{\text{R}}$  = 3.09 min,  $\lambda$  = 210 nm, purity 91%).

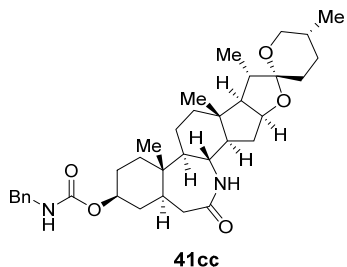

**41cc**, yield: (48.5 mg, 84%).  $^1\text{H NMR}$  (400 MHz,  $\text{CDCl}_3$ )  $\delta$  7.47 – 7.16 (m, 5H), 5.75 – 5.45 (m, 1H), 5.01 (s, 1H), 4.57 (tt,  $J$  = 11.4, 4.7 Hz, 1H), 4.37 (dd,  $J$  = 17.5, 6.2 Hz, 3H), 3.57 – 3.19 (m, 3H), 2.68 (dd,  $J$  = 14.3, 10.5 Hz, 1H), 2.21 – 2.11 (m, 1H), 1.99 – 1.55 (m, 13H), 1.55 – 1.25 (m, 6H), 1.25 – 1.05 (m, 3H), 1.01 (s, 3H), 0.97 (d,  $J$  = 6.5 Hz, 3H), 0.79 (d,  $J$  = 6.4 Hz, 3H), 0.77 (s, 3H).  $^{13}\text{C NMR}$  (101 MHz,  $\text{CDCl}_3$ )  $\delta$  177.0, 156.0, 138.6, 128.6, 127.5, 127.4, 109.2, 79.5, 72.9, 66.8, 61.8, 54.0, 53.3, 51.0, 44.9, 41.7, 41.4, 40.0, 39.3, 39.2, 38.7, 37.1, 36.8, 32.4, 31.2, 30.2, 28.7, 27.3, 22.0, 17.0, 15.9, 14.4, 12.6. **HRMS** (ESI)  $m/z$ : anal. calculated for  $[\text{C}_{35}\text{H}_{50}\text{N}_2\text{O}_5 + \text{H}]^+$  : 579.3792, found: 579.3780. LC-MS ( $t_{\text{R}}$  = 3.15 min,  $\lambda$  = 210 nm, purity >99%).

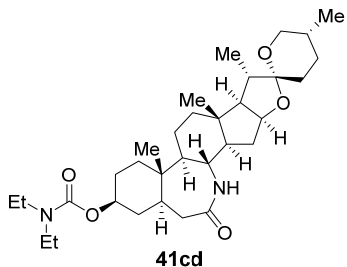

**41cd**, yield: (22.8 mg, 42%).  $^1\text{H NMR}$  (400 MHz,  $\text{CDCl}_3$ )  $\delta$  5.30 – 5.15 (m, 1H), 4.56 (tt,  $J$  = 11.5, 4.5 Hz, 1H), 4.40 (q,  $J$  = 7.7 Hz, 1H), 3.48 (dd,  $J$  = 10.5, 4.4 Hz, 2H), 3.37 (t,  $J$  = 10.9 Hz, 1H), 3.26 (s, 3H), 2.70 (dd,  $J$  = 14.4, 10.5 Hz, 1H), 2.15 (ddt,  $J$  = 12.2, 7.5, 3.6 Hz, 1H), 1.98 – 1.06 (m, 29H), 1.04 (s, 3H), 0.98 (d,  $J$  = 6.6 Hz, 3H), 0.80 (d,  $J$  = 6.4 Hz, 3H), 0.78 (s, 3H).  $^{13}\text{C NMR}$  (101 MHz,  $\text{CDCl}_3$ )  $\delta$  177.0, 155.4, 109.2, 79.6, 72.7, 66.9, 61.9, 54.2, 53.5, 51.1, 41.7, 41.5, 40.1, 39.4, 39.3,

38.8, 37.2, 37.1, 32.5, 31.3, 30.2, 28.7, 27.6, 22.1, 17.1, 16.0, 14.4, 12.7. **HRMS** (ESI) *m/z*: anal. calculated for  $[C_{32}H_{52}N_2O_5 + H]^+$ : 545.3949, found: 545.3946.

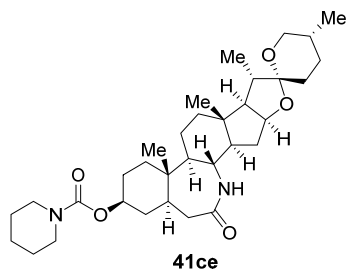

**41ce**, yield: (37.8 mg, 68%). **<sup>1</sup>H NMR** (400 MHz,  $CDCl_3$ )  $\delta$  5.50 (d,  $J = 2.1$  Hz, 1H), 4.53 (tt,  $J = 11.5, 4.6$  Hz, 1H), 4.38 (q,  $J = 7.6$  Hz, 1H), 3.64 – 3.20 (m, 7H), 2.68 (dd,  $J = 14.4, 10.5$  Hz, 1H), 2.19 – 2.09 (m, 1H), 1.95 – 1.26 (m, 25H), 1.15 (dtd,  $J = 13.4, 8.2, 5.0$  Hz, 3H), 1.02 (s, 3H), 0.96 (d,  $J = 6.6$  Hz, 3H), 0.78 (d,  $J = 6.2$  Hz, 3H), 0.76 (s, 3H). **<sup>13</sup>C NMR** (101 MHz,  $CDCl_3$ )  $\delta$  177.1, 155.0, 109.2, 79.6, 72.9, 66.9, 61.9, 54.1, 53.4, 51.1, 44.7, 41.7, 41.5, 40.1, 39.4, 39.3, 38.8, 37.2, 37.0, 32.5, 31.3, 30.2, 28.7, 27.5, 25.7, 24.4, 22.1, 17.1, 16.0, 14.4, 12.7. **HRMS** (ESI) *m/z*: anal. calculated for  $[C_{33}H_{52}N_2O_5 + Na]^+$ : 579.3768, found: 579.3774. LC-MS ( $t_R = 3.42$  min,  $\lambda = 210$  nm, purity 92%).

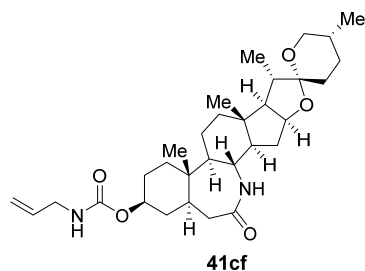

**41cf**, yield: (45.9 mg, 87%). **<sup>1</sup>H NMR** (400 MHz,  $CDCl_3$ )  $\delta$  5.83 (ddt,  $J = 16.0, 10.8, 5.6$  Hz, 1H), 5.56 (d,  $J = 12.3$  Hz, 1H), 5.26 – 5.02 (m, 2H), 4.72 (s, 1H), 4.54 (dq,  $J = 11.5, 6.7, 5.8$  Hz, 1H), 4.38 (q,  $J = 7.5$  Hz, 1H), 3.78 (t,  $J = 6.2$  Hz, 2H), 3.45 (tt,  $J = 8.6, 4.1$  Hz, 2H), 3.35 (t,  $J = 10.9$  Hz, 1H), 2.68 (dd,  $J = 14.4, 10.5$  Hz, 1H), 2.14 (ddd,  $J = 11.2, 7.4, 4.3$  Hz, 1H), 1.96 – 1.54 (m, 13H), 1.54 – 1.27 (m, 5H), 1.27 – 1.04 (m, 4H), 1.01 (s, 3H), 0.96 (d,  $J = 6.6$  Hz, 3H), 0.78 (d,  $J = 6.2$  Hz, 3H), 0.76 (s, 3H). **<sup>13</sup>C NMR** (101 MHz,  $CDCl_3$ )  $\delta$  177.1, 155.8, 134.6, 115.9, 109.2, 79.5, 72.8, 66.8, 61.8, 54.0, 53.3, 51.0, 43.3, 41.7, 41.4, 40.0, 39.3, 39.2, 38.7, 37.1, 36.8, 32.4, 31.2, 30.2, 28.7, 27.3, 22.0, 17.0, 15.9, 14.4, 12.6. **HRMS** (ESI) *m/z*: anal. calculated for  $[C_{31}H_{48}N_2O_5 + Na]^+$ : 551.3455, found: 551.3450. LC-MS ( $t_R = 3.42$  min,  $\lambda = 210$  nm, purity 94%).

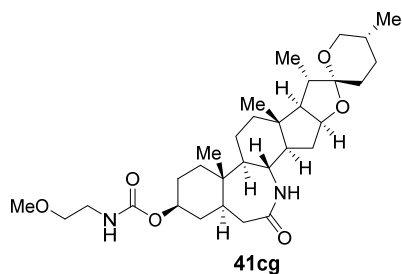

**41cg**, yield: (44.7 mg, 82%). **<sup>1</sup>H NMR** (400 MHz,  $CDCl_3$ )  $\delta$  5.64 (s, 1H), 4.99 (t,  $J = 5.7$  Hz, 1H),

4.51 (tt,  $J = 11.4, 5.1$  Hz, 1H), 4.37 (q,  $J = 7.6$  Hz, 1H), 3.43 (q,  $J = 6.5, 5.1$  Hz, 4H), 3.34 (d,  $J = 5.4$  Hz, 6H), 2.67 (dd,  $J = 14.3, 10.5$  Hz, 1H), 2.27 – 2.06 (m, 1H), 1.95 – 1.51 (m, 13H), 1.53 – 1.24 (m, 6H), 1.25 – 1.02 (m, 3H), 1.00 (s, 3H), 0.95 (d,  $J = 6.6$  Hz, 3H), 0.77 (d,  $J = 6.4$  Hz, 3H), 0.75 (s, 3H).  $^{13}\text{C NMR}$  (101 MHz,  $\text{CDCl}_3$ )  $\delta$  177.1, 155.9, 109.2, 79.5, 72.6, 71.4, 66.8, 61.8, 58.7, 54.0, 53.3, 51.0, 41.6, 41.4, 40.56, 40.0, 39.3, 39.2, 38.6, 37.1, 36.8, 32.4, 31.2, 30.2, 28.7, 27.3, 22.0, 17.0, 15.9, 14.4, 12.6. **HRMS** (ESI)  $m/z$ : anal. calculated for  $[\text{C}_{31}\text{H}_{50}\text{N}_2\text{O}_6 + \text{Na}]^+$ : 569.3561, found: 569.3545.

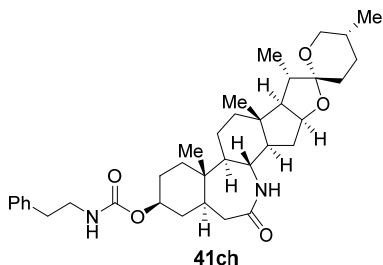

**41ch**, yield: (52.6 mg, 89%).  $^1\text{H NMR}$  (400 MHz,  $\text{CDCl}_3$ )  $\delta$  7.62 – 6.97 (m, 5H), 5.68 (t,  $J = 5.4$  Hz, 1H), 4.67 (t,  $J = 6.1$  Hz, 1H), 4.52 (tt,  $J = 10.9, 4.6$  Hz, 1H), 4.39 (q,  $J = 7.0$  Hz, 1H), 3.41 (ddd,  $J = 30.6, 16.6, 8.5$  Hz, 5H), 2.80 (t,  $J = 7.1$  Hz, 2H), 2.68 (dd,  $J = 14.3, 10.3$  Hz, 1H), 2.16 (ddd,  $J = 10.8, 7.1, 3.7$  Hz, 1H), 2.06 – 1.54 (m, 14H), 1.48 – 1.25 (m, 7H), 1.24 – 1.05 (m, 3H), 1.00 (s, 3H), 0.97 (d,  $J = 6.1$  Hz, 3H), 0.79 (d,  $J = 6.2$  Hz, 3H), 0.77 (s, 3H).  $^{13}\text{C NMR}$  (101 MHz,  $\text{CDCl}_3$ )  $\delta$  177.1, 155.8, 138.8, 128.7, 128.5, 126.4, 109.2, 79.5, 72.6, 66.8, 61.8, 53.9, 53.3, 51.0, 41.9, 41.6, 41.4, 40.0, 39.3, 39.2, 38.6, 37.1, 36.8, 36.0, 32.4, 31.2, 30.2, 28.7, 27.3, 22.0, 17.0, 15.9, 14.4, 12.6. **HRMS** (ESI)  $m/z$ : anal. calculated for  $[\text{C}_{36}\text{H}_{52}\text{N}_2\text{O}_5 + \text{H}]^+$ : 593.3949, found: 593.3936. LC-MS ( $t_{\text{R}} = 3.35$  min,  $\lambda = 210$  nm, purity >99%).

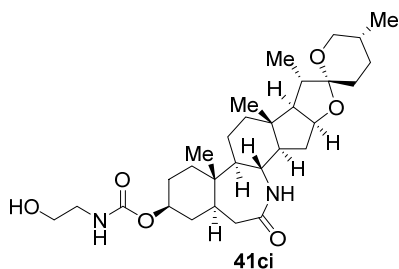

**41ci**, yield: (42.6 mg, 79%).  $^1\text{H NMR}$  (500 MHz,  $\text{CDCl}_3$ )  $\delta$  5.50 (t,  $J = 6.6$  Hz, 1H), 5.29 (d,  $J = 7.6$  Hz, 1H), 4.52 (hept,  $J = 5.2$  Hz, 1H), 4.39 (q,  $J = 7.6$  Hz, 1H), 3.69 (t,  $J = 5.2$  Hz, 2H), 3.53 – 3.40 (m, 2H), 3.40 – 3.17 (m, 3H), 2.81 (s, 1H), 2.69 (dd,  $J = 14.3, 10.6$  Hz, 1H), 2.14 (ddd,  $J = 12.0, 7.3, 4.6$  Hz, 1H), 1.97 – 1.24 (m, 16H), 1.23 – 1.04 (m, 3H), 1.01 (s, 3H), 0.96 (d,  $J = 6.5$  Hz, 3H), 0.79 (d,  $J = 6.3$  Hz, 3H), 0.77 (s, 3H).  $^{13}\text{C NMR}$  (126 MHz,  $\text{CDCl}_3$ )  $\delta$  177.2, 156.7, 109.2, 79.5, 72.9, 66.9, 62.2, 61.8, 54.0, 53.3, 51.1, 43.4, 41.7, 41.4, 40.1, 39.3, 39.1, 38.7, 37.1, 36.9, 32.4, 31.2, 30.2, 28.7, 27.3, 22.1, 17.1, 15.9, 14.4, 12.6. **HRMS** (ESI)  $m/z$ : anal. calculated for  $[\text{C}_{30}\text{H}_{48}\text{N}_2\text{O}_6 + \text{H}]^+$ : 533.3585, found: 533.3590. LC-MS ( $t_{\text{R}} = 2.98$  min,  $\lambda = 210$  nm, purity >99%).



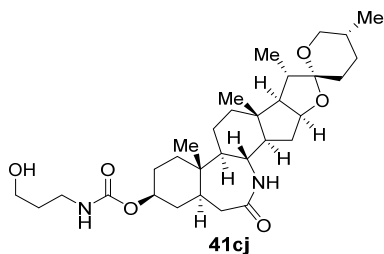

**41cj**, yield: (43.7 mg, 80%).  $^1\text{H NMR}$  (500 MHz,  $\text{CDCl}_3$ )  $\delta$  5.50 (s, 1H), 5.08 (q,  $J = 8.4, 6.3$  Hz, 1H), 4.52 (hept,  $J = 4.7$  Hz, 1H), 4.39 (q,  $J = 7.3$  Hz, 1H), 3.66 (t,  $J = 5.9$  Hz, 2H), 3.55 – 3.12 (m, 4H), 2.92 (s, 1H), 2.69 (dd,  $J = 14.5, 10.4$  Hz, 1H), 2.14 (ddd,  $J = 11.8, 7.4, 4.7$  Hz, 1H), 2.03 – 1.54 (m, 10H), 1.54 – 1.26 (m, 4H), 1.26 – 1.05 (m, 3H), 1.01 (s, 3H), 0.96 (d,  $J = 6.5$  Hz, 3H), 0.78 (d,  $J = 6.3$  Hz, 3H), 0.76 (s, 3H).  $^{13}\text{C NMR}$  (126 MHz,  $\text{CDCl}_3$ )  $\delta$  177.1, 156.9, 109.2, 79.5, 72.9, 66.9, 61.8, 59.5, 54.0, 53.3, 51.1, 41.7, 41.4, 40.1, 39.3, 39.2, 38.7, 37.5, 37.1, 36.8, 32.6, 32.4, 31.2, 30.2, 28.7, 27.3, 22.0, 17.1, 15.9, 14.4, 12.6. **HRMS** (ESI)  $m/z$ : anal. calculated for  $[\text{C}_{31}\text{H}_{50}\text{N}_2\text{O}_6 + \text{H}]^+$ : 547.3742, found: 547.3740. LC-MS ( $t_{\text{R}} = 3.01$  min,  $\lambda = 210$  nm, purity >99%).

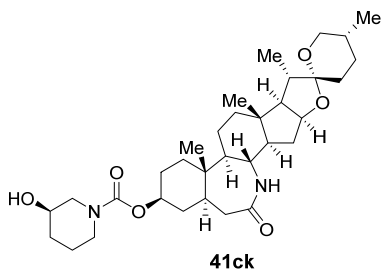

**41ck**, yield: (48.0 mg, 84%).  $^1\text{H NMR}$  (400 MHz,  $\text{CDCl}_3$ )  $\delta$  5.44 (s, 1H), 4.54 (tt,  $J = 11.5, 4.7$  Hz, 1H), 4.39 (q,  $J = 7.7$  Hz, 1H), 3.91 – 3.41 (m, 5H), 3.36 (t,  $J = 10.9$  Hz, 1H), 3.25 – 2.94 (m, 2H), 2.69 (dd,  $J = 14.4, 10.5$  Hz, 1H), 2.14 (td,  $J = 7.3, 3.9$  Hz, 2H), 1.99 – 1.07 (m, 28H), 1.02 (s, 3H), 0.96 (d,  $J = 6.6$  Hz, 3H), 0.79 (d,  $J = 6.4$  Hz, 3H), 0.77 (s, 3H).  $^{13}\text{C NMR}$  (101 MHz,  $\text{CDCl}_3$ )  $\delta$  177.1, 155.3, 109.2, 79.5, 73.3, 66.9, 66.0, 61.8, 54.1, 53.3, 51.1, 50.6, 43.9, 41.7, 41.4, 40.1, 39.4, 39.2, 38.7, 37.1, 36.9, 32.4, 31.2, 30.2, 28.7, 27.4, 22.3, 22.1, 17.1, 15.9, 14.4, 12.6. **HRMS** (ESI)  $m/z$ : anal. calculated for  $[\text{C}_{33}\text{H}_{52}\text{N}_2\text{O}_6 + \text{Na}]^+$ : 595.3718, found: 595.3718. LC-MS ( $t_{\text{R}} = 3.03$  min,  $\lambda = 210$  nm, purity 87%).

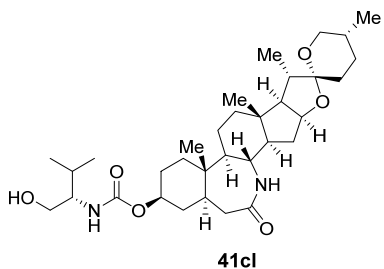

**41cl**, yield: (47.7 mg, 82%).  $^1\text{H NMR}$  (500 MHz,  $\text{CDCl}_3$ )  $\delta$  5.44 (dt,  $J = 6.3, 3.2$  Hz, 1H), 4.87 – 4.65 (m, 1H), 4.52 (p,  $J = 6.2$  Hz, 1H), 4.39 (q,  $J = 7.8$  Hz, 1H), 3.83 – 3.54 (m, 2H), 3.57 – 3.40 (m, 2H), 3.36 (t,  $J = 11.0$  Hz, 1H), 2.69 (dd,  $J = 14.3, 10.6$  Hz, 1H), 2.40 (s, 1H), 2.15 (ddd,  $J = 12.1, 7.6, 4.9$  Hz, 1H), 1.97 – 1.54 (m, 10H), 1.54 – 1.28 (m, 5H), 1.23 – 1.05 (m, 3H), 1.02 (s, 3H), 0.97 – 0.92 (m, 9H), 0.79 (d,  $J = 6.5$  Hz, 3H), 0.77 (s, 3H).  $^{13}\text{C NMR}$  (126 MHz,  $\text{CDCl}_3$ )  $\delta$  177.1, 156.7,

109.2, 79.6, 72.9, 66.9, 64.0, 61.9, 58.4, 54.1, 53.4, 51.1, 41.7, 41.4, 40.1, 39.3, 39.2, 38.7, 37.1, 36.8, 32.4, 31.3, 30.2, 29.3, 28.7, 27.3, 22.1, 19.5, 18.5, 17.1, 15.9, 14.4, 12.6. **HRMS** (ESI)  $m/z$ : anal. calculated for  $[C_{33}H_{54}N_2O_6 + Na]^+$ : 597.3874, found: 597.3865. LC-MS ( $t_R = 3.04$  min,  $\lambda = 210$  nm, purity 87%).

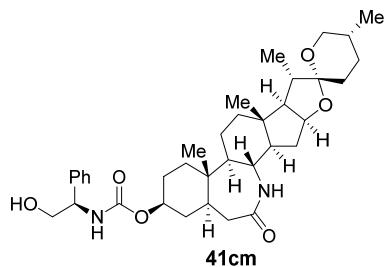

**41cm**, yield: (38.9 mg, 64%).  **$^1H$  NMR** (400 MHz,  $CDCl_3$ )  $\delta$  7.65 – 7.07 (m, 5H), 6.61 (s, 1H), 5.53 (s, 1H), 4.81 (s, 1H), 4.52 (s, 1H), 4.38 (q,  $J = 7.1$  Hz, 1H), 4.01 – 3.64 (m, 2H), 3.54 – 3.20 (m, 3H), 2.71 (dd,  $J = 30.8, 17.2$  Hz, 2H), 2.14 (ddd,  $J = 11.6, 7.5, 4.6$  Hz, 1H), 2.01 – 1.53 (m, 14H), 1.54 – 1.22 (m, 7H), 1.20 – 1.06 (m, 4H), 1.00 (s, 3H), 0.96 (d,  $J = 6.1$  Hz, 3H), 0.79 (d,  $J = 6.2$  Hz, 3H), 0.76 (s, 3H).  **$^{13}C$  NMR** (101 MHz,  $CDCl_3$ )  $\delta$  177.2, 156.0, 139.5, 128.6, 127.6, 126.6, 109.2, 79.5, 73.0, 66.9, 66.4, 61.8, 57.0, 54.0, 53.2, 51.1, 41.7, 41.4, 40.0, 39.3, 39.1, 38.7, 37.0, 32.4, 31.2, 30.2, 28.7, 27.3, 22.0, 17.1, 15.9, 14.4, 12.6. **HRMS** (ESI)  $m/z$ : anal. calculated for  $[C_{36}H_{52}N_2O_6 + Na]^+$ : 631.3718, found: 631.3717. LC-MS ( $t_R = 3.37$  min,  $\lambda = 254$  nm, purity >99%).

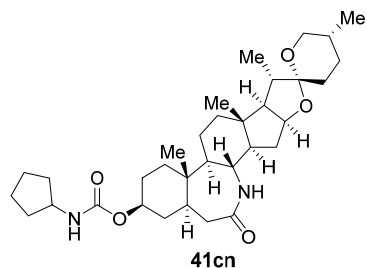

**41cn**, yield: (35.5 mg, 64%).  **$^1H$  NMR** (400 MHz,  $CDCl_3$ )  $\delta$  5.50 (d,  $J = 14.5$  Hz, 1H), 4.76 – 4.45 (m, 2H), 4.39 (q,  $J = 7.6$  Hz, 1H), 3.95 (dt,  $J = 7.9, 4.8$  Hz, 1H), 3.56 – 3.41 (m, 2H), 3.37 (q,  $J = 11.4, 10.9$  Hz, 1H), 2.68 (dd,  $J = 14.4, 10.5$  Hz, 1H), 2.14 (ddd,  $J = 11.5, 7.5, 4.3$  Hz, 1H), 2.01 – 1.27 (m, 29H), 1.27 – 1.05 (m, 3H), 1.01 (s, 3H), 0.96 (d,  $J = 6.5$  Hz, 3H), 0.79 (d,  $J = 6.2$  Hz, 3H), 0.76 (s, 3H).  **$^{13}C$  NMR** (101 MHz,  $CDCl_3$ )  $\delta$  177.0, 155.4, 109.2, 79.5, 72.4, 66.9, 61.8, 54.1, 53.4, 52.6, 51.0, 41.7, 41.4, 40.1, 39.3, 39.2, 38.7, 37.1, 36.9, 33.2, 32.4, 31.2, 30.2, 28.7, 27.4, 23.5, 22.1, 17.1, 15.9, 14.4, 12.6. **HRMS** (ESI)  $m/z$ : anal. calculated for  $[C_{33}H_{52}N_2O_5 + Na]^+$ : 579.3768, found: 579.3771. LC-MS ( $t_R = 3.62$  min,  $\lambda = 210$  nm, purity 88%).

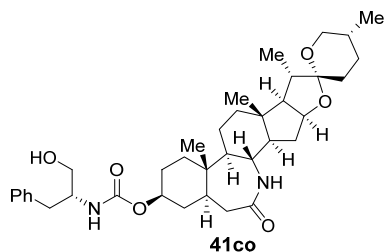

**41co**, yield: (46.0 mg, 74%).  $^1\text{H NMR}$  (400 MHz,  $\text{CDCl}_3$ )  $\delta$  7.48 – 7.01 (m, 5H), 5.76 – 5.39 (m, 1H), 5.26 – 4.96 (m, 1H), 4.44 (dq,  $J = 39.0, 7.6, 6.3$  Hz, 2H), 4.08 – 3.72 (m, 1H), 3.65 (dd,  $J = 11.2, 3.9$  Hz, 1H), 3.55 (dd,  $J = 11.2, 5.0$  Hz, 1H), 3.45 (hept,  $J = 4.6$  Hz, 2H), 3.36 (t,  $J = 10.9$  Hz, 1H), 2.86 (d,  $J = 7.3$  Hz, 3H), 2.68 (dd,  $J = 14.4, 10.5$  Hz, 1H), 2.15 (td,  $J = 7.2, 3.7$  Hz, 1H), 1.97 – 1.52 (m, 13H), 1.53 – 1.24 (m, 7H), 1.24 – 1.01 (m, 4H), 1.00 (s, 3H), 0.97 (d,  $J = 6.5$  Hz, 3H), 0.79 (d,  $J = 6.2$  Hz, 3H), 0.77 (s, 3H).  $^{13}\text{C NMR}$  (101 MHz,  $\text{CDCl}_3$ )  $\delta$  177.3, 156.0, 137.9, 129.3, 128.5, 126.4, 109.2, 79.5, 77.3, 72.8, 66.9, 63.7, 61.8, 54.0, 53.2, 51.1, 41.7, 41.4, 40.1, 39.3, 39.1, 38.7, 37.3, 37.1, 36.8, 32.4, 31.2, 30.2, 28.7, 27.3, 22.0, 17.1, 15.9, 14.4, 12.6. **HRMS** (ESI)  $m/z$ : anal. calculated for  $[\text{C}_{37}\text{H}_{54}\text{N}_2\text{O}_6 + \text{H}]^+$ : 623.4055, found: 623.4059. LC-MS ( $t_{\text{R}} = 3.37$  min,  $\lambda = 210$  nm, purity >99%).

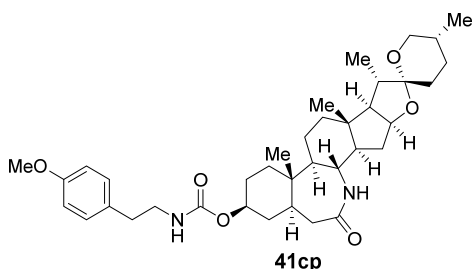

**41cp**, yield: (47.9 mg, 77%).  $^1\text{H NMR}$  (400 MHz,  $\text{CDCl}_3$ )  $\delta$  7.22 (t,  $J = 7.8$  Hz, 1H), 6.83 – 6.61 (m, 3H), 5.75 – 5.52 (m, 1H), 4.65 (t,  $J = 5.8$  Hz, 1H), 4.52 (dq,  $J = 11.2, 5.6, 4.5$  Hz, 1H), 4.46 – 4.31 (m, 1H), 3.80 (s, 3H), 3.59 – 3.20 (m, 5H), 2.78 (t,  $J = 7.0$  Hz, 2H), 2.69 (dd,  $J = 14.4, 10.3$  Hz, 1H), 2.16 (ddd,  $J = 11.1, 7.5, 4.2$  Hz, 1H), 1.97 – 1.53 (m, 13H), 1.53 – 1.24 (m, 6H), 1.24 – 1.04 (m, 3H), 1.01 (s, 3H), 0.97 (d,  $J = 6.6$  Hz, 3H), 0.79 (d,  $J = 6.4$  Hz, 3H), 0.77 (s, 3H).  $^{13}\text{C NMR}$  (101 MHz,  $\text{CDCl}_3$ )  $\delta$  177.2, 159.7, 155.8, 140.4, 129.5, 121.1, 114.4, 111.8, 109.2, 79.6, 72.6, 66.8, 61.8, 55.1, 54.0, 53.3, 51.1, 41.9, 41.7, 41.4, 40.0, 39.3, 39.2, 38.7, 37.1, 36.8, 36.1, 32.4, 31.2, 30.2, 28.7, 27.3, 22.1, 17.1, 15.9, 14.4, 12.6. **HRMS** (ESI)  $m/z$ : anal. calculated for  $[\text{C}_{37}\text{H}_{54}\text{N}_2\text{O}_6 + \text{Na}]^+$ : 645.3874, found: 645.3881. LC-MS ( $t_{\text{R}} = 3.07$  min,  $\lambda = 210$  nm, purity >99%).

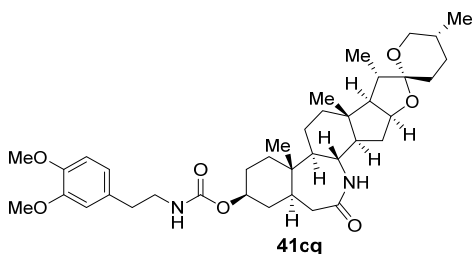

**41cq**, yield: (56.7 mg, 87%).  $^1\text{H NMR}$  (400 MHz,  $\text{CDCl}_3$ )  $\delta$  6.80 (d,  $J = 8.1$  Hz, 1H), 6.76 – 6.62 (m, 2H), 5.58 (d,  $J = 11.6$  Hz, 1H), 4.64 (t,  $J = 6.2$  Hz, 1H), 4.58 – 4.44 (m, 1H), 4.39 (q,  $J = 7.6$  Hz, 1H), 3.86 (d,  $J = 3.9$  Hz, 7H), 3.56 – 3.18 (m, 5H), 2.88 – 2.56 (m, 3H), 2.15 (ddd,  $J = 11.1, 6.8, 4.2$  Hz, 1H), 1.97 – 1.52 (m, 14H), 1.52 – 1.23 (m, 7H), 1.23 – 1.04 (m, 3H), 1.00 (s, 3H), 0.96 (d,  $J = 6.6$  Hz, 3H), 0.78 (d,  $J = 6.4$  Hz, 3H), 0.76 (s, 3H).  $^{13}\text{C NMR}$  (101 MHz,  $\text{CDCl}_3$ )  $\delta$  177.1, 155.8, 148.9, 147.6, 131.3, 120.6, 111.9, 111.3, 109.2, 79.5, 72.6, 66.8, 61.8, 55.9, 55.8, 54.0, 53.3, 51.0, 42.1, 41.7, 41.4, 40.0, 39.3, 39.2, 38.7, 37.1, 36.8, 35.6, 32.4, 31.2, 30.2, 28.7, 27.3, 22.0, 17.0, 15.9, 14.4, 12.6. **HRMS** (ESI)  $m/z$ : anal. calculated for  $[\text{C}_{38}\text{H}_{56}\text{N}_2\text{O}_7 + \text{Na}]^+$ : 675.3980, found: 675.3978. LC-MS ( $t_{\text{R}} = 3.01$  min,  $\lambda = 254$  nm, purity 98%).

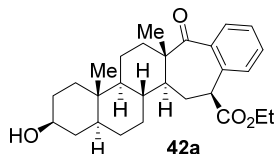

To a solution of **14** (199 mg, 0.36 mol.) in THF (10 mL) was added 2 N HCl (2.0 ml). The reaction mixture was heated at reflux for 2 h. The mixture was cooled to room temperature, diluted with ethyl acetate (50 mL), and washed with NaHCO<sub>3</sub> (20 mL × 2) and brine (20 mL × 2). The organic phase was dried over sodium sulfate and concentrated in vacuum. Flash column chromatography over silica column afforded **40a**; Yield: (142 mg, 90%). **<sup>1</sup>H NMR** (500 MHz, CDCl<sub>3</sub>) δ 7.40 (td, *J* = 7.4, 1.7 Hz, 1H), 7.37 – 7.28 (m, 2H), 7.13 (dd, *J* = 7.6, 1.2 Hz, 1H), 4.06 (qq, *J* = 10.8, 7.2 Hz, 2H), 3.86 (dd, *J* = 9.3, 4.5 Hz, 1H), 3.54 (tt, *J* = 11.1, 4.8 Hz, 1H), 2.36 (ddd, *J* = 14.7, 9.4, 3.4 Hz, 1H), 2.17 – 1.95 (m, 2H), 1.78 (ddd, *J* = 11.2, 5.2, 2.6 Hz, 1H), 1.73 – 1.49 (m, 5H), 1.48 – 1.21 (m, 7H), 1.19 (s, 3H), 1.15 (t, *J* = 7.1 Hz, 3H), 1.00 (tt, *J* = 12.5, 3.4 Hz, 1H), 0.92 – 0.83 (m, 2H), 0.78 (s, 3H), 0.68 – 0.55 (m, 1H). **<sup>13</sup>C NMR** (126 MHz, CDCl<sub>3</sub>) δ 213.7, 173.5, 140.2, 134.3, 130.5, 129.1, 128.0, 127.6, 71.1, 61.3, 53.3, 50.6, 49.5, 45.9, 44.1, 37.8, 37.7, 36.7, 35.6, 35.5, 31.3, 30.8, 28.5, 28.0, 20.4, 14.9, 13.9, 12.2. **HRMS** (ESI) *m/z*: anal. calculated for [C<sub>28</sub>H<sub>38</sub>O<sub>4</sub> + NH<sub>4</sub>]<sup>+</sup>: 456.3108, found: 456.3116. LC-MS (*t*<sub>R</sub> = 3.23 min, λ = 254 nm, purity 95%).

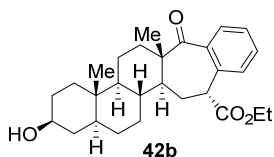

**42b**, Yield: (147 mg, 84%). **<sup>1</sup>H NMR** (500 MHz, CDCl<sub>3</sub>) δ 7.40 (td, *J* = 7.6, 1.5 Hz, 1H), 7.31 (t, *J* = 7.4 Hz, 1H), 7.28 – 7.20 (m, 1H), 7.10 (d, *J* = 7.7 Hz, 1H), 4.32 – 4.14 (m, 2H), 3.71 (dd, *J* = 12.6, 5.9 Hz, 1H), 3.54 (tt, *J* = 10.6, 4.8 Hz, 1H), 2.33 (td, *J* = 13.2, 5.4 Hz, 1H), 1.97 (dq, *J* = 13.0, 3.7 Hz, 1H), 1.85 – 1.67 (m, 3H), 1.67 – 1.45 (m, 4H), 1.43 – 1.14 (m, 14H), 0.99 (tt, *J* = 12.6, 3.3 Hz, 1H), 0.93 – 0.83 (m, 2H), 0.77 (s, 3H), 0.59 (td, *J* = 11.1, 3.6 Hz, 1H). **<sup>13</sup>C NMR** (126 MHz, CDCl<sub>3</sub>) δ 215.6, 172.8, 139.8, 134.3, 131.0, 127.4, 126.0, 124.3, 71.1, 61.0, 52.9, 49.0, 45.7, 43.9, 43.9, 37.9, 37.8, 36.8, 36.6, 35.5, 31.3, 31.2, 30.7, 28.4, 20.6, 14.1, 14.0, 12.2. **HRMS** (ESI) *m/z*: anal. calculated for [C<sub>28</sub>H<sub>38</sub>O<sub>4</sub> + NH<sub>4</sub>]<sup>+</sup>: 456.3108, found: 456.3103. LC-MS (*t*<sub>R</sub> = 2.36 min, λ = 254 nm, purity 98%).

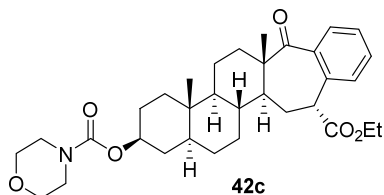

**42c**, white solid, yield: (42.9 mg, 77%). **<sup>1</sup>H NMR** (CDCl<sub>3</sub>, 500 MHz) δ 7.41 (td, *J* = 7.5, 1.0 Hz, 1H), 7.32 (t, *J* = 7.3 Hz, 1H), 7.25 (d, *J* = 7.4 Hz, 1H), 7.10 (d, *J* = 7.8 Hz, 1H), 4.58-4.52 (m, 1H), 4.26-4.17 (m, 2H), 3.70 (dd, *J* = 12.9, 5.8 Hz, 1H), 3.63 (br, 4H), 3.44-3.43 (m, 4H), 2.34 (td, *J* = 13.2, 5.2 Hz, 1H), 1.98-1.95 (m, 1H), 1.84-1.82 (m, 1H), 1.76-1.71 (m, 2H), 1.64-1.58 (m, 3H),

1.49-1.15 (m, 14H), 1.09-1.05 (m, 1H), 0.94 (td,  $J = 13.4, 3.6$  Hz, 1H), 0.79 (s, 3H), 0.77-0.72 (m, 1H), 0.64-0.60 (m, 1H).  $^{13}\text{C NMR}$  ( $\text{CDCl}_3$ , 125 MHz)  $\delta$  215.7, 172.8, 155.2, 139.9, 134.4, 131.1, 127.5, 126.1, 124.4, 74.7, 61.1, 52.8, 49.0, 45.7, 43.9, 43.8, 37.9, 36.7, 36.6, 35.6, 34.3, 31.3, 30.7, 28.4, 27.8, 20.6, 14.2, 14.1, 12.2. **HRMS** (ESI):  $m/z$ : calculated for  $\text{C}_{33}\text{H}_{46}\text{NO}_6$ :  $[\text{M} + \text{H}]^+$  552.3320, found: 552.3322.

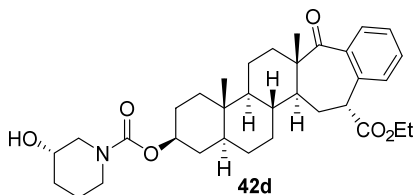

**42d**, white solid, yield: (54.0 mg, 99%).  $^1\text{H NMR}$  ( $\text{CDCl}_3$ , 500 MHz)  $\delta$  7.41 (td,  $J = 7.6, 1.0$  Hz, 1H), 7.32 (t,  $J = 7.3$  Hz, 1H), 7.25 (d,  $J = 7.3$  Hz, 1H), 7.09 (d,  $J = 7.8$  Hz, 1H), 4.56-4.49 (m, 1H), 4.26-4.17 (m, 2H), 3.75-3.68 (m, 3H), 3.53 (br, 1H), 3.16-3.11 (m, 2H), 2.33 (td,  $J = 13.1, 5.2$  Hz, 1H), 1.98-1.95 (m, 1H), 1.87-1.81 (m, 2H), 1.75-1.70 (m, 3H), 1.64-1.57 (m, 3H), 1.53-1.43 (m, 3H), 1.36-1.16 (m, 13H), 1.08-1.03 (m, 1H), 0.93 (td,  $J = 13.5, 3.8$  Hz, 1H), 0.79 (s, 3H), 0.76-0.71 (m, 1H), 0.64-0.59 (m, 1H).  $^{13}\text{C NMR}$  ( $\text{CDCl}_3$ , 125 MHz)  $\delta$  215.7, 172.8, 155.7, 139.9, 134.4, 131.1, 127.5, 126.1, 124.4, 74.6, 61.1, 52.9, 50.7, 49.0, 45.7, 43.9, 43.8, 37.9, 36.7, 36.6, 35.6, 34.3, 31.3, 30.7, 28.4, 27.8, 20.6, 14.2, 14.1, 12.3. **HRMS** (ESI):  $m/z$ : calculated for  $\text{C}_{34}\text{H}_{48}\text{NO}_6$ :  $[\text{M} + \text{Na}]^+$  566.3476, found: 566.3480.

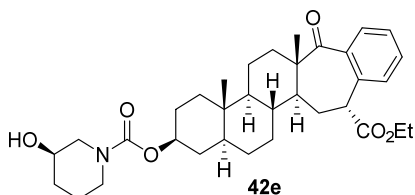

**42e**, white solid, yield: (15.8 mg, 28%).  $^1\text{H NMR}$  ( $\text{CDCl}_3$ , 500 MHz)  $\delta$  7.41 (td,  $J = 7.6, 1.0$  Hz, 1H), 7.32 (t,  $J = 7.3$  Hz, 1H), 7.25 (d,  $J = 7.4$  Hz, 1H), 7.09 (d,  $J = 7.6$  Hz, 1H), 4.55-4.49 (m, 1H), 4.26-4.17 (m, 2H), 3.76-3.68 (m, 3H), 3.54 (br, 1H), 3.14-3.08 (m, 2H), 2.33 (td,  $J = 13.1, 5.1$  Hz, 1H), 1.98-1.95 (m, 1H), 1.87-1.81 (m, 2H), 1.75-1.70 (m, 3H), 1.62-1.57 (m, 3H), 1.52-1.43 (m, 3H), 1.36-1.15 (m, 13H), 1.08-1.03 (m, 1H), 0.93 (td,  $J = 13.6, 3.6$  Hz, 1H), 0.79 (s, 3H), 0.76-0.71 (m, 1H), 0.64-0.59 (m, 1H).  $^{13}\text{C NMR}$  ( $\text{CDCl}_3$ , 125 MHz)  $\delta$  215.7, 172.8, 155.6, 139.9, 134.4, 131.1, 127.5, 126.1, 124.4, 74.5, 61.1, 52.8, 50.7, 49.0, 45.7, 43.9, 43.8, 37.9, 36.7, 36.6, 35.6, 34.3, 31.3, 30.7, 28.4, 27.8, 20.6, 14.2, 14.1, 12.2. **HRMS** (ESI):  $m/z$ : calculated for  $\text{C}_{34}\text{H}_{48}\text{NO}_6$ :  $[\text{M} + \text{H}]^+$  566.3476, found: 566.3476.

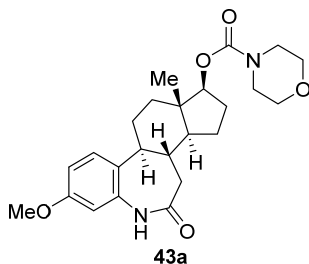

**43a**, white solid, yield: (11.1 mg, 26%).  $^1\text{H NMR}$  ( $\text{CDCl}_3$ , 500 MHz)  $\delta$  7.93 (s, 1H), 7.19 (d,  $J = 8.8$  Hz, 1H), 6.76 (dd,  $J = 8.5, 2.6$  Hz, 1H), 6.54 (d,  $J = 2.5$  Hz, 1H), 4.71 (dd,  $J = 9.1, 7.8$  Hz, 1H), 3.80 (s, 3H), 3.67 (m, 4H), 3.48-3.46 (m, 4H), 2.49 (td,  $J = 12.1, 3.0$  Hz, 1H), 2.44 (dd,  $J = 12.7, 8.6$  Hz, 1H), 2.30-2.22 (m, 1H), 2.17 (dd,  $J = 12.8, 1.4$  Hz, 1H), 2.04-1.98 (m, 2H), 1.96-1.89 (m, 2H), 1.78-1.68 (m, 2H), 1.62-1.54 (m, 1H), 1.45-1.32 (m, 2H), 0.88 (s, 3H).  $^{13}\text{C NMR}$  ( $\text{CDCl}_3$ , 125 MHz)  $\delta$  174.6, 158.7, 155.5, 138.2, 129.7, 126.2, 111.3, 107.7, 83.4, 55.5, 49.1, 45.9, 44.2, 43.7, 36.9, 35.6, 27.8, 25.2, 23.7, 12.5. **HRMS** (ESI):  $m/z$ : calculated for  $\text{C}_{24}\text{H}_{33}\text{N}_2\text{O}_5$ :  $[\text{M} + \text{H}]^+$  429.2384, found: 429.2396. LC-MS ( $t_{\text{R}} = 2.79$  min,  $\lambda = 254$  nm, purity >99%).

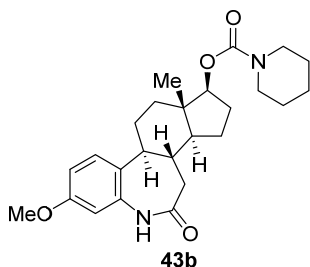

**43b**, white solid, yield: (11.1 mg, 13%).  $^1\text{H NMR}$  ( $\text{CDCl}_3$ , 500 MHz)  $\delta$  7.54 (s, 1H), 7.19 (d,  $J = 8.6$  Hz, 1H), 6.75 (dd,  $J = 8.6, 2.6$  Hz, 1H), 6.53 (d,  $J = 2.5$  Hz, 1H), 4.69 (dd,  $J = 9.2, 7.8$  Hz, 1H), 3.80 (s, 3H), 3.42 (t,  $J = 4.8$  Hz, 4H), 2.49 (td,  $J = 12.2, 2.3$  Hz, 1H), 2.43 (dd,  $J = 12.8, 8.5$  Hz, 1H), 2.29-2.21 (m, 1H), 2.17 (d,  $J = 12.7, 1.8$  Hz, 1H), 2.05-1.97 (m, 2H), 1.96-1.89 (m, 2H), 1.77-1.68 (m, 2H), 1.60-1.53 (m, 7H), 1.44-1.34 (m, 2H), 0.88 (s, 3H).  $^{13}\text{C NMR}$  ( $\text{CDCl}_3$ , 125 MHz)  $\delta$  174.2, 158.6, 155.5, 138.2, 129.8, 126.3, 111.2, 107.7, 82.9, 55.5, 49.1, 45.9, 44.9, 44.3, 43.7, 36.9, 35.6, 27.9, 25.2, 24.5, 23.8, 12.5. **HRMS** (ESI):  $m/z$ : calculated for  $\text{C}_{25}\text{H}_{35}\text{N}_2\text{O}_4$ :  $[\text{M} + \text{H}]^+$  427.2591, found: 427.2597. LC-MS ( $t_{\text{R}} = 3.01$  min,  $\lambda = 254$  nm, purity 98%).

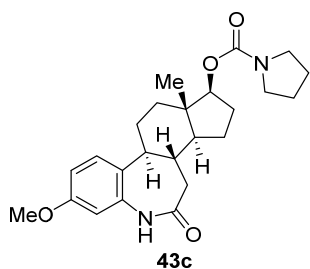

**43c**, white solid, yield: (10.0 mg, 12%).  $^1\text{H NMR}$  ( $\text{CDCl}_3$ , 500 MHz)  $\delta$  7.75 (s, 1H), 7.19 (d,  $J = 8.6$  Hz, 1H), 6.75 (dd,  $J = 8.6, 2.6$  Hz, 1H), 6.53 (d,  $J = 2.5$  Hz, 1H), 4.68 (dd,  $J = 9.0, 7.9$  Hz, 1H), 3.80 (s, 3H), 3.40-3.33 (m, 4H), 2.49 (td,  $J = 12.1, 2.9$  Hz, 1H), 2.43 (dd,  $J = 12.8, 8.5$  Hz, 1H), 2.30-2.22 (m, 1H), 2.17 (d,  $J = 12.6, 1.4$  Hz, 1H), 2.05-2.00 (m, 2H), 1.94-1.84 (m, 6H), 1.77-1.68 (m, 2H), 1.62-1.54 (m, 1H), 1.44-1.34 (m, 2H), 0.89 (s, 3H).  $^{13}\text{C NMR}$  ( $\text{CDCl}_3$ , 125 MHz)  $\delta$  174.5, 158.6, 155.2, 138.2, 129.8, 126.3, 111.3, 107.7, 82.7, 55.5, 49.1, 46.0, 44.3, 43.7, 36.8, 35.6, 28.0, 25.2, 23.8, 12.4. **HRMS** (ESI):  $m/z$ : calculated for  $\text{C}_{24}\text{H}_{33}\text{N}_2\text{O}_4$ :  $[\text{M} + \text{H}]^+$  413.2435, found: 413.2442. LC-MS ( $t_{\text{R}} = 2.97$  min,  $\lambda = 254$  nm, purity 97%).

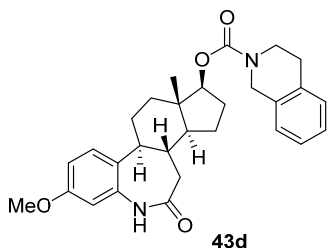

**43d**, white solid, yield: (17.0 mg, 18%). <sup>1</sup>H NMR (CDCl<sub>3</sub>, 500 MHz) δ 7.87 (s, 1H), 7.20-7.11 (m, 5H), 6.75 (dd, *J* = 8.7, 2.5 Hz, 1H), 6.54 (d, *J* = 2.4 Hz, 1H), 4.75 (dd, *J* = 8.9, 8.0 Hz, 1H), 4.63 (m, 2H), 3.80 (s, 3H), 3.71 (t, *J* = 5.7 Hz, 2H), 2.86 (t, *J* = 5.7 Hz, 2H), 2.49 (td, *J* = 12.1, 2.9 Hz, 1H), 2.43 (dd, *J* = 12.8, 8.6 Hz, 1H), 2.32-2.24 (m, 1H), 2.18 (d, *J* = 12.9, 1.7 Hz, 1H), 2.05-1.99 (m, 2H), 1.97-1.90 (m, 2H), 1.78-1.69 (m, 2H), 1.65-1.58 (m, 1H), 1.46-1.36 (m, 2H), 0.92 (s, 3H). <sup>13</sup>C NMR (CDCl<sub>3</sub>, 125 MHz) δ 174.6, 158.6, 138.1, 129.7, 126.6, 126.3, 111.3, 107.7, 83.2, 55.5, 49.1, 46.0, 45.8, 44.2, 43.8, 36.9, 35.6, 27.9, 25.2, 23.7, 12.6. HRMS (ESI): *m/z*: calculated for C<sub>29</sub>H<sub>35</sub>N<sub>2</sub>O<sub>4</sub>: [M + H]<sup>+</sup> 475.2591, found: 475.2596. LC-MS (*t*<sub>R</sub> = 3.15 min, λ = 254 nm, purity 98%).

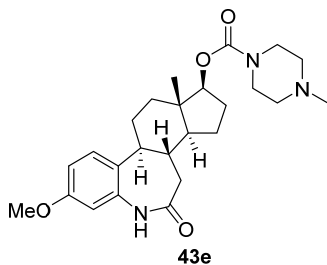

**43e**, white solid, yield: (15.1 mg, 36%). <sup>1</sup>H NMR (CDCl<sub>3</sub>, 500 MHz) δ 8.03 (s, 1H), 7.18 (d, *J* = 8.6 Hz, 1H), 6.76 (dd, *J* = 8.5, 2.4 Hz, 1H), 6.55 (d, *J* = 2.8 Hz, 1H), 4.69 (dd, *J* = 8.9, 7.8 Hz, 1H), 3.80 (s, 3H), 3.67 (br, 4H), 2.79 (br, 4H), 2.50-2.41 (m, 2H), 2.29-2.21 (m, 1H), 2.16 (d, *J* = 13.5 Hz, 1H), 2.04-1.97 (m, 2H), 1.96-1.87 (m, 2H), 1.77-1.67 (m, 2H), 1.60-1.53 (m, 1H), 1.45-1.32 (m, 2H), 0.87 (s, 3H). <sup>13</sup>C NMR (CDCl<sub>3</sub>, 125 MHz) δ 174.5, 158.7, 155.0, 138.2, 129.6, 126.2, 111.2, 107.8, 83.7, 55.5, 53.5, 49.0, 45.9, 44.4, 44.2, 43.7, 36.8, 35.6, 27.8, 25.2, 23.7, 12.5. HRMS (ESI): *m/z*: calculated for C<sub>25</sub>H<sub>36</sub>N<sub>3</sub>O<sub>4</sub>: [M + H]<sup>+</sup> 442.2700, found: 442.2706. LC-MS (*t*<sub>R</sub> = 2.07 min, λ = 254 nm, purity >99%).

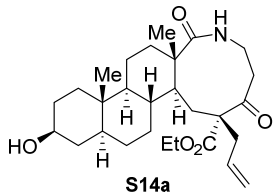

**S14a**, white solid, yield: (125 mg, 88%). <sup>1</sup>H NMR (CDCl<sub>3</sub>, 400 MHz) δ 6.18-6.17 (m, 1H), 5.61-5.50 (m, 1H), 5.06-4.99 (m, 2H), 4.31-4.23 (m, 1H), 4.17-4.07 (m, 2H), 3.62-3.57 (m, 1H), 3.20-3.16 (m, 1H), 3.08-3.02 (m, 1H), 2.68-2.63 (m, 1H), 2.45-2.40 (m, 1H), 1.86-1.81 (m, 2H), 1.73-1.57 (m, 8H), 1.43-1.10 (m, 13H), 1.07 (s, 3H), 1.02-0.93 (m, 1H), 0.86-0.82 (m, 1H), 0.79 (s, 3H). <sup>13</sup>C NMR (CDCl<sub>3</sub>, 100 MHz) δ 210.5, 180.3, 171.8, 132.9, 119.1, 71.1, 65.9, 61.1, 53.5, 48.0, 46.7, 44.8, 42.6, 38.8, 37.9, 37.6, 37.2, 37.1, 36.7, 36.1, 35.5, 31.4, 30.8, 28.9, 20.0, 14.7, 14.0, 12.3.

**HRMS (ESI):**  $m/z$ : calculated for  $C_{28}H_{43}NNaO_5$ :  $[M + Na]^+$  496.3033, found: 496.3019.

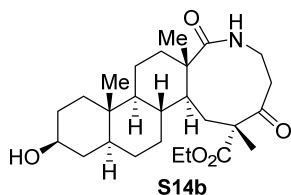

**S14b**, white solid, yield: (118 mg, 88%). **<sup>1</sup>H NMR** (CDCl<sub>3</sub>, 400 MHz)  $\delta$  6.17-6.15 (m, 1H), 4.23-4.15 (m, 2H), 4.08-4.03 (m, 1H), 3.66-3.60 (m, 1H), 3.30-3.20 (m, 2H), 2.24-2.21 (m, 1H), 1.83-1.59 (m, 10H), 1.47-1.24 (m, 13H), 1.08 (s, 3H), 1.03-0.86 (m, 4H), 0.80 (s, 3H). **<sup>13</sup>C NMR** (CDCl<sub>3</sub>, 100 MHz)  $\delta$  211.6, 180.8, 172.3, 71.1, 62.2, 61.0, 53.3, 48.1, 46.7, 44.8, 39.5, 38.0, 37.9, 37.4, 36.8, 36.1, 35.8, 35.1, 31.4, 30.6, 28.9, 23.6, 20.1, 14.5, 14.0, 12.4. **HRMS (ESI):**  $m/z$ : calculated for  $C_{26}H_{42}NO_5$ :  $[M + H]^+$  448.3058, found: 448.3058.

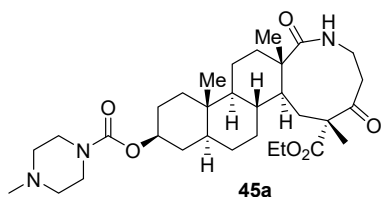

**45a**, white solid, yield: (516 mg, 90%). **<sup>1</sup>H NMR** (CDCl<sub>3</sub>, 400 MHz)  $\delta$  6.07-6.05 (m, 1H), 4.61-4.56 (m, 1H), 4.20-4.17 (m, 2H), 4.10-4.14 (m, 1H), 3.59 (br, 4H), 3.22-3.20 (m, 2H), 2.63 (br, 4H), 2.44 (s, 3H), 2.31-2.28 (m, 1H), 1.86-1.59 (m, 10H), 1.49-1.40 (m, 2H), 1.34-1.26 (m, 10H), 1.19-1.17 (m, 2H), 1.08 (s, 3H), 0.90-0.85 (m, 2H), 0.81 (s, 3H). **<sup>13</sup>C NMR** (CDCl<sub>3</sub>, 100 MHz)  $\delta$  211.6, 180.7, 172.5, 154.9, 74.8, 62.1, 61.1, 53.8, 53.5, 48.1, 46.8, 42.4, 39.5, 38.0, 37.4, 36.5, 36.1, 36.0, 35.2, 34.3, 30.6, 28.8, 27.7, 23.7, 20.0, 14.5, 14.0, 12.3. **HRMS (ESI):**  $m/z$ : calculated for  $C_{32}H_{52}N_3O_6$ :  $[M + H]^+$  574.3851, found: 574.3849.

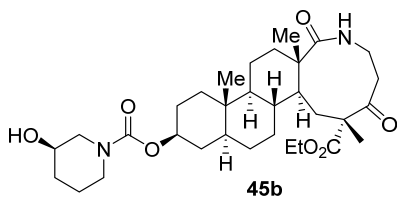

**45b**, white solid, yield: (51.0 mg, 89%). **<sup>1</sup>H NMR** (CDCl<sub>3</sub>, 400 MHz)  $\delta$  6.09-6.07 (m, 1H), 4.58-4.55 (m, 1H), 4.19-4.17 (m, 2H), 4.09-4.03 (m, 1H), 3.74 (d,  $J = 10.5$  Hz, 2H), 3.55-3.52 (m, 1H), 3.21-3.11 (m, 4H), 2.30-2.27 (m, 1H), 1.86-1.63 (m, 13H), 1.50-1.46 (m, 4H), 1.36-1.29 (m, 10H), 1.19-1.16 (m, 2H), 1.07 (s, 3H), 0.89-0.87 (m, 2H), 0.81 (s, 3H). **<sup>13</sup>C NMR** (CDCl<sub>3</sub>, 100 MHz)  $\delta$  211.6, 180.7, 172.5, 155.6, 74.4, 66.1, 62.1, 61.1, 53.3, 50.6, 48.1, 46.7, 44.6, 39.5, 38.0, 37.4, 36.6, 36.1, 36.0, 35.2, 34.3, 30.6, 28.8, 27.8, 23.7, 20.3, 14.5, 14.0, 12.3. **HRMS (ESI):**  $m/z$ : calculated for  $C_{32}H_{51}N_2O_7$ :  $[M + H]^+$  575.3691, found: 575.3697.



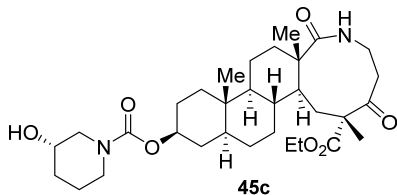

**45c**, white solid, yield: (52.8 mg, 92%). **<sup>1</sup>H NMR** (CDCl<sub>3</sub>, 400 MHz) δ 6.10-6.09 (m, 1H), 4.60-4.55 (m, 1H), 4.21-4.16 (m, 2H), 4.09-4.03 (m, 1H), 3.74 (d, *J* = 10.8 Hz, 2H), 3.55 (br, 1H), 3.22-3.13 (m, 4H), 2.31-2.27 (m, 1H), 1.87-1.63 (M, 13H), 1.52-1.45 (m, 4H), 1.34-1.26 (m, 10H), 1.19-1.17 (m, 2H), 1.07 (s, 3H), 0.91-0.84 (m, 2H), 0.81 (s, 3H). **<sup>13</sup>C NMR** (CDCl<sub>3</sub>, 100 MHz) δ 211.6, 180.7, 172.5, 155.6, 74.4, 66.2, 62.1, 61.1, 53.3, 50.6, 48.1, 46.7, 44.6, 39.5, 38.0, 37.4, 36.6, 36.1, 36.0, 35.2, 34.3, 30.6, 28.8, 27.8, 23.7, 22.3, 20.0, 14.5, 14.0, 12.3. **HRMS** (ESI): *m/z*: calculated for C<sub>32</sub>H<sub>51</sub>N<sub>2</sub>O<sub>7</sub>: [M + H]<sup>+</sup> 575.3691, found: 575.3692.

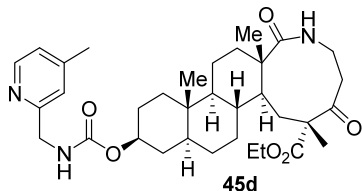

**45d**, white solid, yield: (10.1 mg, 17%). **<sup>1</sup>H NMR** (CDCl<sub>3</sub>, 400 MHz) δ 8.39 (d, *J* = 5.0 Hz, 1H), 7.21 (s, 1H), 7.10 (d, *J* = 4.4 Hz, 1H), 6.09 (d, *J* = 7.2 Hz, 1H), 5.91 (m, 1H), 4.60-4.55 (m, 1H), 4.45 (d, *J* = 5.5 Hz, 2H), 4.22-4.16 (m, 2H), 4.09-4.03 (m, 1H), 3.22-3.20 (m, 4H), 2.38 (s, 3H), 2.31-2.28 (m, 1H), 1.83-1.79 (m, 2H), 1.72-1.63 (m, 6H), 1.48-1.42 (m, 2H), 1.35-1.29 (m, 9H), 1.17-1.15 (m, 2H), 1.07 (s, 3H), 1.03-0.97 (m, 1H), 0.88-0.82 (m, 2H), 0.79 (s, 3H). **<sup>13</sup>C NMR** (CDCl<sub>3</sub>, 100 MHz) δ 211.6, 180.8, 172.5, 156.6, 156.5, 149.5, 147.7, 123.8, 123.6, 74.1, 62.1, 61.1, 53.3, 48.1, 46.8, 45.3, 44.7, 39.5, 38.0, 37.4, 36.6, 36.1, 36.0, 35.2, 34.2, 30.6, 28.7, 27.7, 23.7, 21.2, 20.0, 14.5, 14.0, 12.3. **HRMS** (ESI): *m/z*: calculated for C<sub>34</sub>H<sub>50</sub>N<sub>3</sub>O<sub>6</sub>: [M + H]<sup>+</sup> 596.3694, found: 596.3692.

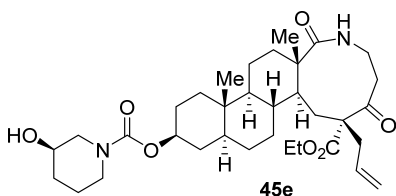

**45e**, white solid, yield: (34.2 mg, 57%). **<sup>1</sup>H NMR** (CDCl<sub>3</sub>, 400 MHz) δ 6.19-6.17 (m, 1H), 5.61-5.50 (m, 1H), 5.01-4.97 (m, 2H), 4.61-4.54 (m, 1H), 4.31-4.23 (m, 1H), 4.16-4.10 (m, 2H), 3.75 (d, *J* = 10.6 Hz, 2H), 3.56-3.53 (m, 1H), 3.21-3.10 (m, 3H), 3.02-2.95 (m, 1H), 2.66-2.61 (m, 1H), 2.51-2.40 (m, 2H), 1.88-1.40 (m, 16H), 1.34-1.19 (m, 9H), 1.06 (s, 3H), 1.01-0.98 (m, 1H), 0.88-0.82 (m, 2H), 0.80 (s, 3H). **<sup>13</sup>C NMR** (CDCl<sub>3</sub>, 100 MHz) δ 210.5, 180.1, 172.0, 155.6, 132.9, 119.1, 74.4, 66.1, 65.9, 61.2, 53.4, 50.6, 47.9, 46.7, 44.6, 42.7, 38.7, 37.8, 37.2, 37.1, 36.6, 36.1, 35.6, 34.3, 30.8, 28.7, 27.8, 19.9, 14.7, 14.0, 12.3. **HRMS** (ESI): *m/z*: calculated for C<sub>34</sub>H<sub>52</sub>N<sub>2</sub>NaO<sub>7</sub>: [M + Na]<sup>+</sup> 623.3667, found: 623.3667.

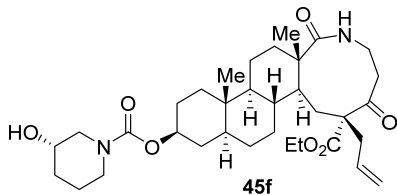

**45f**, white solid, yield: (40.8 mg, 68%). <sup>1</sup>H NMR (CDCl<sub>3</sub>, 500 MHz) δ 6.17-6.15 (m, 1H), 5.60-5.51 (m, 1H), 5.01-4.98 (m, 2H), 4.60-4.55 (m, 1H), 4.30-4.24 (m, 1H), 4.18-4.10 (m, 2H), 3.75 (d, *J* = 10.4 Hz, 2H), 3.55 (br, 1H), 3.19-3.13 (m, 3H), 3.00-2.97 (m, 1H), 4.65-4.61 (m, 1H), 2.50-2.41 (m, 2H), 1.86-1.41 (m, 16H), 1.33-1.19 (m, 9H), 1.07 (s, 3H), 1.01-0.99 (m, 1H), 0.89-0.84 (m, 2H), 0.80 (s, 3H). <sup>13</sup>C NMR (CDCl<sub>3</sub>, 125 MHz) δ 210.6, 180.2, 172.1, 155.5, 133.0, 119.2, 74.5, 66.3, 66.0, 61.3, 53.5, 50.7, 48.0, 46.8, 44.7, 42.8, 38.8, 37.9, 37.3, 37.2, 36.6, 36.1, 35.7, 34.4, 30.9, 28.8, 27.8, 20.0, 14.8, 14.1, 12.4. HRMS (ESI): *m/z*: calculated for C<sub>34</sub>H<sub>52</sub>N<sub>2</sub>NaO<sub>7</sub>: [M + Na]<sup>+</sup> 623.3667, found: 623.3639.

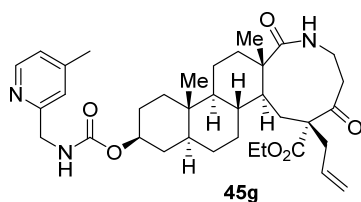

**45g**, white solid, yield: (17.3 mg, 28%). <sup>1</sup>H NMR (CDCl<sub>3</sub>, 400 MHz) δ 8.38 (d, *J* = 4.0 Hz, 1H), 7.14 (s, 1H), 7.04 (d, *J* = 4.0 Hz, 1H), 6.16 (d, *J* = 8.0 Hz, 1H), 5.77 (s, 1H), 5.01-5.60 (m, 1H), 4.98-5.01 (m, 2H), 4.56-4.61 (m, 1H), 4.43 (d, *J* = 4.0 Hz, 2H), 4.25-4.31 (m, 1H), 4.10-4.18 (m, 2H), 3.15-3.21 (m, 1H), 2.95-3.01 (m, 1H), 2.40-2.66 (m, 6H), 2.36 (s, 1H), 1.83 (dd, *J* = 16.0, 6.0 Hz, 1H), 1.54-1.71 (m, 6H), 1.18-1.48 (m, 3H), 1.06 (s, 2H), 0.72-0.86 (m, 4H). HRMS (ESI): *m/z*: calculated for C<sub>32</sub>H<sub>55</sub>NO<sub>2</sub>: [M + H]<sup>+</sup> 622.3851, found: 622.3849.

#### General procedure for syntheses of azide

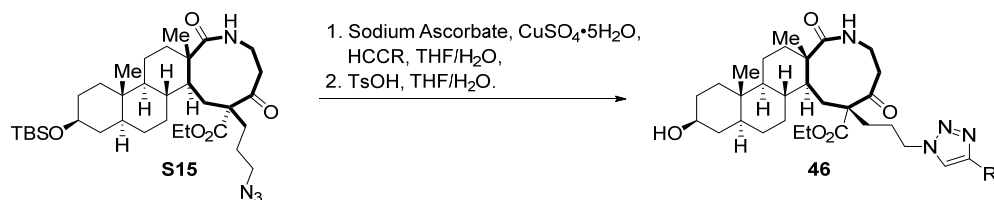

#### Supplementary Figure 14. Synthesis of azide. General procedure B was used for alkylation of 17.

To a vial containing azide **S5** (0.25 mmol) was added a solution of copper sulfate pentahydrate (187 mg, 0.125 mmol) and sodium ascorbate (75 mg, 0.375 mmol) in 2:1 water/*t*-butanol (6 ml) followed by alkyne (0.75 mmol). Dichloromethane (3.0 ml) was then added to vials help dissolve the azide. The reaction was stirred at room temperature for 24 hours then diluted with diethyl ether (50 mL), and washed with brine (10 mL × 2). The organic phase was dried over sodium sulfate and concentrated in vacuum to afford crude product which was directly used in the next step without further purification. To a solution of the above product in THF/H<sub>2</sub>O (5:1, 10 mL) was added TsOH

(19.0 mg, 0.1 mmol). The reaction mixture was stirred overnight. The mixture was diluted with EtOAc (50 mL), and washed with brine (10 mL  $\times$  2). The organic phase was dried over sodium sulfate and concentrated in vacuum. Flash column chromatography over silica column afforded **46**.

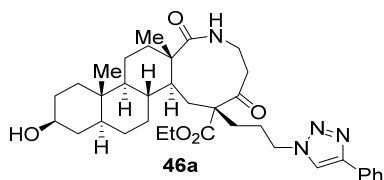

**46a**, yield: (51.9 mg, 84%).  $^1\text{H NMR}$  (500 MHz,  $\text{CDCl}_3$ )  $\delta$  7.82 (d,  $J = 7.6$  Hz, 2H), 7.71 (s, 1H), 7.43 (t,  $J = 7.6$  Hz, 2H), 7.34 (t,  $J = 7.4$  Hz, 1H), 6.23 (d,  $J = 8.9$  Hz, 1H), 4.44 – 4.01 (m, 5H), 3.58 (tt,  $J = 10.7, 4.9$  Hz, 1H), 3.17 (ddt,  $J = 12.9, 5.8, 3.0$  Hz, 1H), 2.93 (dt,  $J = 12.6, 6.4$  Hz, 1H), 2.60 (dt,  $J = 11.6, 5.6$  Hz, 1H), 1.99 – 1.46 (m, 12H), 1.48 – 1.12 (m, 9H), 1.12 – 0.90 (m, 5H), 0.86 – 0.73 (m, 4H), 0.68 (qd,  $J = 12.2, 3.9$  Hz, 1H).  $^{13}\text{C NMR}$  (126 MHz,  $\text{CDCl}_3$ )  $\delta$  210.7, 179.9, 171.7, 147.8, 130.4, 128.8, 128.1, 125.6, 119.4, 70.9, 65.4, 61.3, 53.4, 50.1, 47.8, 46.6, 44.7, 38.6, 38.1, 37.8, 37.6, 37.1, 36.6, 36.0, 35.5, 35.0, 31.3, 30.8, 28.7, 26.6, 19.8, 14.6, 13.9, 12.2. **HRMS** (ESI)  $m/z$ : anal. calculated for  $[\text{C}_{36}\text{H}_{50}\text{N}_4\text{O}_5 + \text{H}]^+$ : 619.3854, found: 619.3839. LC-MS ( $t_{\text{R}} = 1.81$  min,  $\lambda = 254$  nm, purity 98%).

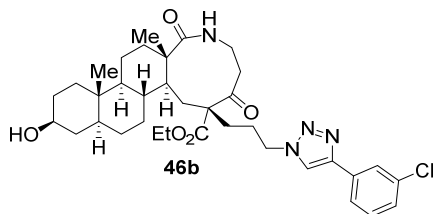

**46b**, yield: (46.9 mg, 72%).  $^1\text{H NMR}$  (500 MHz,  $\text{CDCl}_3$ )  $\delta$  7.82 (s, 1H), 7.78 – 7.61 (m, 2H), 7.49 – 7.20 (m, 2H), 6.24 (dd,  $J = 9.5, 3.5$  Hz, 1H), 4.48 – 3.93 (m, 5H), 3.58 (dt,  $J = 11.1, 5.8$  Hz, 1H), 3.30 – 3.12 (m, 1H), 2.93 (dt,  $J = 12.5, 6.3$  Hz, 1H), 2.61 (dd,  $J = 11.8, 5.9$  Hz, 1H), 2.00 – 1.47 (m, 12H), 1.49 – 1.12 (m, 9H), 1.12 – 0.85 (m, 6H), 0.86 – 0.74 (m, 4H), 0.68 (qd,  $J = 12.4, 4.0$  Hz, 1H).  $^{13}\text{C NMR}$  (126 MHz,  $\text{CDCl}_3$ )  $\delta$  210.7, 179.9, 171.7, 146.5, 134.7, 132.2, 130.11, 128.1, 125.7, 123.7, 119.9, 70.9, 65.4, 61.3, 53.4, 50.2, 47.8, 46.6, 44.7, 38.6, 38.1, 37.8, 37.56, 37.1, 36.6, 36.0, 35.5, 35.0, 31.3, 30.8, 28.7, 26.6, 19.8, 14.6, 13.9, 12.2. **HRMS** (ESI)  $m/z$ : anal. calculated for  $[\text{C}_{36}\text{H}_{49}\text{ClN}_4\text{O}_5 + \text{Na}]^+$ : 675.3284, found: 675.3273. LC-MS ( $t_{\text{R}} = 2.65$  min,  $\lambda = 254$  nm, purity 99%).

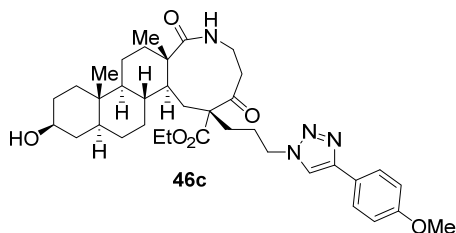

**46c**, yield: (49.2 mg, 76%).  $^1\text{H NMR}$  (500 MHz, Chloroform- $d$ )  $\delta$  7.74 (d,  $J = 8.7$  Hz, 2H), 7.63 (s, 1H), 7.03 – 6.85 (m, 2H), 6.29 (dd,  $J = 9.7, 3.4$  Hz, 1H), 4.48 – 3.99 (m, 5H), 3.84 (s, 3H), 3.58 (tt,  $J = 10.7, 4.8$  Hz, 1H), 3.24 – 3.10 (m, 1H), 2.94 (dt,  $J = 12.6, 6.3$  Hz, 1H), 2.58 (dt,  $J = 11.9, 5.8$  Hz, 1H), 2.04 (s, 2H), 1.97 – 1.47 (m, 13H), 1.49 – 1.12 (m, 10H), 1.12 – 1.00 (m, 4H), 0.94 (td,  $J$

= 13.5, 3.9 Hz, 1H), 0.85 – 0.73 (m, 4H), 0.68 (qd,  $J = 12.4, 4.2$  Hz, 1H).  $^{13}\text{C}$  NMR (126 MHz,  $\text{CDCl}_3$ )  $\delta$  210.7, 179.9, 171.6, 159.5, 147.6, 126.9, 123.1, 118.6, 114.2, 70.9, 65.4, 61.2, 55.2, 53.4, 50.0, 47.7, 46.6, 44.7, 38.6, 38.0, 37.7, 37.4, 37.0, 36.6, 36.0, 35.4, 34.9, 31.2, 30.7, 28.7, 26.6, 19.8, 14.6, 13.8, 12.2. **HRMS** (ESI)  $m/z$ : anal. calculated for  $[\text{C}_{37}\text{H}_{52}\text{N}_4\text{O}_6 + \text{H}]^+$ : 649.3960, found: 649.3955. LC-MS ( $t_{\text{R}} = 1.96$  min,  $\lambda = 254$  nm, purity 98%).

#### General procedure for syntheses of imide.

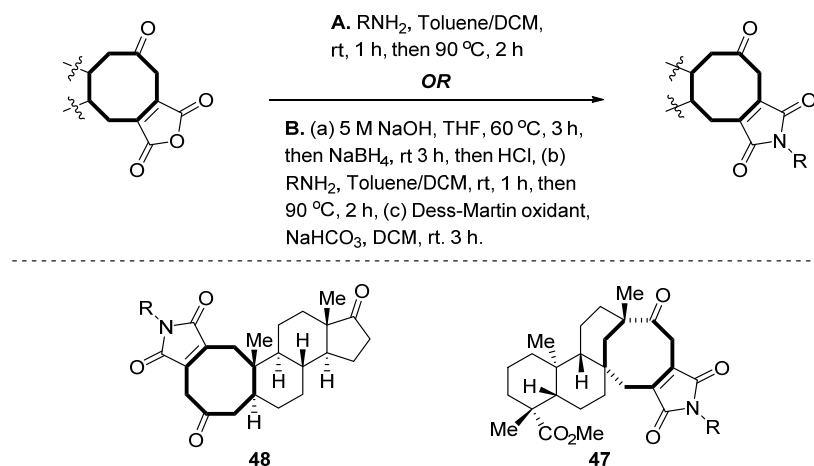

**Supplementary Figure 15. Synthesis of imides.** General procedure H was used for preparation of **47**, DMF was used as solvent for amino acid. General procedure I was used for preparation of **48**.

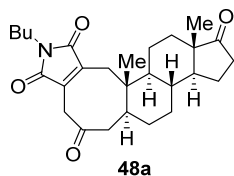

**48a**, yield: 23.7 mg, 54%.  $^1\text{H}$  NMR (500 MHz,  $\text{CDCl}_3$ )  $\delta$  3.62 (d,  $J = 17.8$  Hz, 1H), 3.50 (t,  $J = 7.2$  Hz, 2H), 3.36 (d,  $J = 18.1$  Hz, 1H), 2.85 – 2.63 (m, 2H), 2.44 (dd,  $J = 19.3, 8.4$  Hz, 1H), 2.33 (dq,  $J = 13.3, 3.5$  Hz, 1H), 2.21 (dd,  $J = 15.7, 2.2$  Hz, 1H), 2.17 – 1.99 (m, 2H), 1.99 – 1.75 (m, 4H), 1.64 – 1.43 (m, 5H), 1.37 – 1.12 (m, 6H), 1.10 – 0.97 (m, 1H), 0.96 (s, 3H), 0.92 (t,  $J = 7.3$  Hz, 3H), 0.87 (s, 3H), 0.63 (td,  $J = 9.4, 8.5, 5.1$  Hz, 1H).  $^{13}\text{C}$  NMR (126 MHz,  $\text{CDCl}_3$ )  $\delta$  220.4, 208.7, 171.2, 170.3, 137.7, 137.2, 51.6, 50.4, 49.2, 47.6, 42.2, 40.1, 38.1, 35.8, 35.1, 31.5, 30.5, 30.5, 30.4, 29.7, 29.5, 21.6, 20.9, 19.9, 15.0, 13.9, 13.6. **HRMS** (ESI)  $m/z$ : anal. calculated for  $[\text{C}_{27}\text{H}_{37}\text{NO}_4 + \text{Na}]^+$ : 462.2615, found: 462.2604.

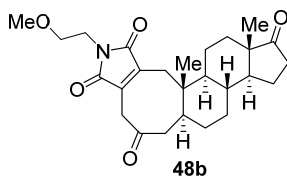

**48b**, yield: 79.2 mg, 60%.  $^1\text{H}$  NMR (500 MHz,  $\text{CDCl}_3$ )  $\delta$  3.66 (td,  $J = 5.6, 1.6$  Hz, 2H), 3.61 (d,  $J = 17.9$  Hz, 1H), 3.53 – 3.42 (m, 2H), 3.32 (d,  $J = 18.1$  Hz, 1H), 3.27 (d,  $J = 1.8$  Hz, 3H), 2.79 – 2.62

(m, 2H), 2.40 (dd,  $J = 19.2, 9.1$  Hz, 1H), 2.29 (dd,  $J = 13.5, 3.8$  Hz, 1H), 2.19 (dt,  $J = 15.7, 2.0$  Hz, 1H), 2.14 – 1.71 (m, 6H), 1.56 – 1.39 (m, 3H), 1.39 – 1.09 (m, 3H), 0.99 (td,  $J = 12.3, 11.7, 6.4$  Hz, 1H), 0.92 (s, 3H), 0.83 (s, 3H), 0.68 – 0.51 (m, 1H).  $^{13}\text{C}$  NMR (126 MHz,  $\text{CDCl}_3$ )  $\delta$  220.3, 208.5, 170.9, 170.0, 137.7, 137.3, 69.1, 58.4, 51.4, 50.1, 49.1, 47.5, 42.5, 42.1, 40.0, 37.5, 35.7, 35.7, 35.0, 31.4, 30.3, 30.3, 29.3, 21.5, 20.8, 14.9, 13.8. **HRMS** (ESI)  $m/z$ : anal. calculated for  $[\text{C}_{26}\text{H}_{35}\text{NO}_5 + \text{Na}]^+$ : 464.2407, found: 464.2393. LC-MS ( $t_{\text{R}} = 2.48$  min,  $\lambda = 254$  nm, purity 97%).

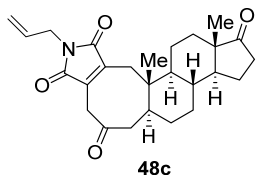

**48c**, yield: 71.0 mg, 56%.  $^1\text{H}$  NMR (500 MHz,  $\text{CDCl}_3$ )  $\delta$  5.78 (ddt,  $J = 17.3, 9.9, 5.7$  Hz, 1H), 5.22 – 5.08 (m, 2H), 4.10 (dt,  $J = 5.7, 1.5$  Hz, 2H), 3.64 (dd,  $J = 18.1, 1.3$  Hz, 1H), 3.36 (d,  $J = 18.1$  Hz, 1H), 2.73 (dd,  $J = 15.6, 12.3$  Hz, 2H), 2.44 (ddd,  $J = 19.2, 8.9, 1.0$  Hz, 1H), 2.32 (dq,  $J = 13.3, 3.6$  Hz, 1H), 2.22 (dd,  $J = 15.7, 2.3$  Hz, 1H), 2.18 – 1.99 (m, 2H), 1.99 – 1.77 (m, 3H), 1.59 – 1.45 (m, 4H), 1.40 – 1.14 (m, 4H), 1.02 (ddd,  $J = 18.3, 7.0, 5.3$  Hz, 1H), 0.96 (s, 3H), 0.87 (s, 3H), 0.63 (ddd,  $J = 12.1, 10.3, 3.7$  Hz, 1H).  $^{13}\text{C}$  NMR (126 MHz,  $\text{CDCl}_3$ )  $\delta$  220.3, 208.4, 170.5, 169.7, 137.8, 137.4, 131.5, 117.6, 51.4, 50.3, 49.1, 47.5, 42.7, 42.2, 40.3, 40.1, 35.7, 35.0, 31.4, 30.4, 30.3, 29.4, 21.6, 20.8, 15.0, 13.9. **HRMS** (ESI)  $m/z$ : anal. calculated for  $[\text{C}_{26}\text{H}_{33}\text{NO}_4 + \text{Na}]^+$ : 446.2302, found: 446.2286. LC-MS ( $t_{\text{R}} = 2.27$  min,  $\lambda = 254$  nm, purity 98%).

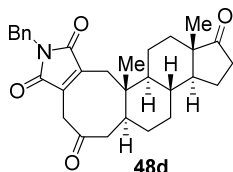

**48d**, yield: 73.4 mg, 52%.  $^1\text{H}$  NMR (500 MHz,  $\text{CDCl}_3$ )  $\delta$  7.35 – 7.17 (m, 5H), 4.73 – 4.51 (m, 2H), 3.62 (d,  $J = 18.2$  Hz, 1H), 3.33 (d,  $J = 18.2$  Hz, 1H), 2.83 – 2.63 (m, 2H), 2.44 (dd,  $J = 19.2, 8.9$  Hz, 1H), 2.31 (dq,  $J = 13.3, 3.6$  Hz, 1H), 2.20 (dd,  $J = 15.7, 2.3$  Hz, 1H), 2.15 – 1.98 (m, 2H), 1.96 – 1.74 (m, 4H), 1.48 (dtd,  $J = 15.0, 8.7, 8.1, 4.1$  Hz, 4H), 1.39 – 1.24 (m, 1H), 1.23 – 1.12 (m, 2H), 1.03 – 0.95 (m, 1H), 0.94 (s, 3H), 0.86 (s, 3H), 0.58 (ddd,  $J = 12.0, 10.3, 3.7$  Hz, 1H).  $^{13}\text{C}$  NMR (126 MHz,  $\text{CDCl}_3$ )  $\delta$  220.3, 208.4, 170.7, 169.8, 137.9, 137.5, 136.1, 128.6, 128.3, 127.8, 51.4, 50.2, 49.1, 47.5, 42.5, 42.1, 41.9, 40.0, 35.7, 35.0, 31.4, 30.4, 30.3, 29.3, 21.5, 20.8, 14.9, 13.9. **HRMS** (ESI)  $m/z$ : anal. calculated for  $[\text{C}_{30}\text{H}_{35}\text{NO}_4 + \text{K}]^+$ : 512.2200, found: 512.2188. LC-MS ( $t_{\text{R}} = 2.97$  min,  $\lambda = 254$  nm, purity 97%).

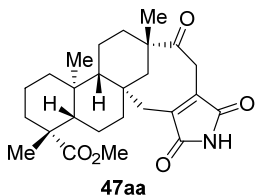

**47aa**, White solid, 26.0 mg, yield 59%.  $^1\text{H}$  NMR (500 MHz,  $\text{CDCl}_3$ )  $\delta$  7.62 (s, 1H), 3.86 (d,  $J =$

18.5 Hz, 1H), 3.67 (s, 3H), 3.16 (d,  $J = 18.5$  Hz, 1H), 2.83 (d,  $J = 14.0$  Hz, 1H), 2.49 (dd,  $J = 13.5$ , 3.5 Hz, 1H), 2.17-2.07 (m, 3H), 1.93 (dd,  $J = 15.0$ , 3.0 Hz, 1H), 1.89-1.73 (m, 3H), 1.60 (d,  $J = 14.0$  Hz, 1H), 1.48-1.39 (m, 2H), 1.35 (d,  $J = 13.5$  Hz, 1H), 1.16 (s, 3H), 1.11 (s, 3H), 1.10-1.04 (m, 2H), 1.03-0.96 (m, 3H), 0.92-0.81 (m, 2H), 0.66 (s, 3H).  **$^{13}\text{C}$  NMR** (125 MHz,  $\text{CDCl}_3$ )  $\delta$  212.0, 177.9, 171.1, 170.3, 140.7, 138.7, 59.0, 57.5, 51.4, 50.0, 48.5, 44.0, 40.4, 40.1, 39.9, 38.4, 37.6, 37.1, 34.7, 29.5, 28.7, 22.7, 19.7, 19.2, 18.4, 14.2. **HRMS** (ESI):  $m/z$ : calculated for  $\text{C}_{26}\text{H}_{35}\text{NO}_5\text{Na}$ :  $[\text{M} + \text{Na}]^+$  464.2407, found: 464.2395. LC-MS ( $t_{\text{R}} = 0.56$  min,  $\lambda = 254$  nm, purity >99%).

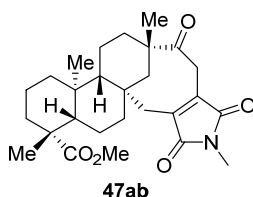

**47ab**, White solid, 20.9 mg, 46%.  **$^1\text{H}$  NMR** (500 MHz,  $\text{CDCl}_3$ )  $\delta$  3.87 (dd,  $J = 18.5$ , 2.0 Hz, 1H), 3.68 (s, 3H), 3.18 (dd,  $J = 18.5$ , 1.5 Hz, 1H), 3.01 (s, 3H), 2.86 (d,  $J = 14.0$  Hz, 1H), 2.51 (dq,  $J = 13.5$ , 3.0 Hz, 1H), 2.18-2.08 (m, 3H), 1.93 (dd,  $J = 14.5$ , 3.0 Hz, 1H), 1.87 (dt,  $J = 14.0$ , 4.0 Hz, 1H), 1.81 (dq,  $J = 15.0$ , 3.0 Hz, 1H), 1.75 (d,  $J = 12.5$  Hz, 1H), 1.62-1.59 (m, 1H), 1.50-1.41 (m, 2H), 1.35 (dt,  $J = 13.0$ , 3.0 Hz, 1H), 1.17 (s, 3H), 1.12 (s, 3H), 1.09-1.06 (m, 2H), 1.03-0.96 (m, 3H), 0.92-0.82 (m, 2H), 0.67 (s, 3H).  **$^{13}\text{C}$  NMR** (125 MHz,  $\text{CDCl}_3$ )  $\delta$  211.9, 177.7, 171.5, 170.5, 139.4, 137.6, 58.7, 57.2, 51.1, 49.8, 48.2, 43.8, 40.2, 39.8, 39.6, 38.2, 37.4, 37.0, 34.4, 29.3, 28.5, 24.1, 22.5, 19.5, 19.0, 18.2, 14.0. **HRMS** (ESI):  $m/z$ : calculated for  $\text{C}_{27}\text{H}_{41}\text{N}_2\text{O}_5$ :  $[\text{M} + \text{NH}_4]^+$  473.3010, found: 473.2998. LC-MS ( $t_{\text{R}} = 0.72$  min,  $\lambda = 254$  nm, purity >99%).

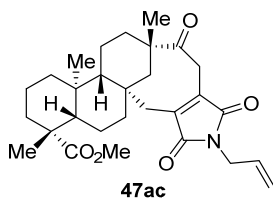

**47ac**, White solid, 41.8 mg, yield 87%.  **$^1\text{H}$  NMR** (500 MHz,  $\text{CDCl}_3$ )  $\delta$  5.80 (ddt,  $J = 17.5$ , 10.0, 5.5 Hz, 1H), 5.19-5.15 (m, 2H), 4.12-4.10 (m, 2H), 3.88 (dd,  $J = 18.5$ , 1.5 Hz, 1H), 3.67 (s, 3H), 3.19 (dd,  $J = 18.5$ , 1.5 Hz, 1H), 2.87 (d,  $J = 14.0$  Hz, 1H), 2.51 (dq,  $J = 13.5$ , 2.5 Hz, 1H), 2.18-2.09 (m, 3H), 1.93 (dd,  $J = 14.5$ , 2.5 Hz, 1H), 1.87 (dt,  $J = 14.0$ , 4.0 Hz, 1H), 1.81 (dq,  $J = 14.5$ , 3.0 Hz, 1H), 1.75 (d,  $J = 12.5$  Hz, 1H), 1.63-1.59 (m, 1H), 1.50-1.41 (m, 2H), 1.34 (dt,  $J = 13.0$ , 3.5 Hz, 1H), 1.17 (s, 3H), 1.12 (s, 3H), 1.10-1.06 (m, 2H), 1.04-0.96 (m, 3H), 0.92-0.82 (m, 2H), 0.67 (s, 3H).  **$^{13}\text{C}$  NMR** (125 MHz,  $\text{CDCl}_3$ )  $\delta$  211.9, 177.7, 171.0, 169.9, 139.4, 137.6, 131.6, 117.5, 58.7, 57.2, 51.1, 49.8, 48.2, 43.8, 40.3, 40.2, 39.8, 39.7, 38.2, 37.4, 37.0, 34.4, 29.2, 28.5, 22.5, 19.5, 19.0, 18.2, 13.9. **HRMS** (ESI):  $m/z$ : calculated for  $\text{C}_{29}\text{H}_{39}\text{NO}_5\text{Na}$ :  $[\text{M} + \text{Na}]^+$  504.2720, found: 504.2712.

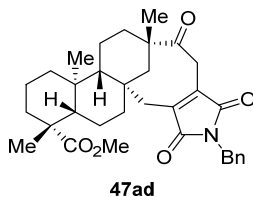

**47ad**, White solid, 53.1 mg, yield 99%.  $^1\text{H NMR}$  (500 MHz,  $\text{CDCl}_3$ )  $\delta$  7.32-7.25 (m, 5H), 4.69 (AB,  $J = 15.0$  Hz, 1H), 4.62 (AB,  $J = 14.5$  Hz, 1H), 3.86 (dd,  $J = 18.5, 2.0$  Hz, 1H), 3.67 (s, 3H), 3.18 (dd,  $J = 18.5, 2.0$  Hz, 1H), 2.86 (d,  $J = 14.0$  Hz, 1H), 2.49 (dq,  $J = 14.0, 3.0$  Hz, 1H), 2.18-2.08 (m, 3H), 1.92 (dd,  $J = 15.0, 3.0$  Hz, 1H), 1.88-1.79 (m, 2H), 1.75 (d,  $J = 12.5$  Hz, 1H), 1.62-1.58 (m, 1H), 1.48-1.40 (m, 2H), 1.34 (dt,  $J = 13.5, 3.5$  Hz, 1H), 1.17 (s, 3H), 1.11 (s, 3H), 1.08-1.05 (m, 2H), 1.03-0.97 (m, 3H), .091-0.82 (m, 2H), 0.66 (s, 3H).  $^{13}\text{C NMR}$  (125 MHz,  $\text{CDCl}_3$ )  $\delta$  212.1, 177.9, 171.3, 170.3, 139.7, 137.9, 136.5, 128.9, 128.5, 138.0, 59.0, 57.5, 51.4, 50.0, 48.5, 44.1, 42.1, 40.4, 40.1, 39.9, 38.5, 37.6, 37.3, 34.7, 29.5, 28.7, 22.9, 19.8, 19.2, 18.4, 14.2. **HRMS** (ESI):  $m/z$ : calculated for  $\text{C}_{33}\text{H}_{45}\text{N}_2\text{O}_5$ :  $[\text{M} + \text{NH}_4]^+$  549.3323, found: 549.3313.

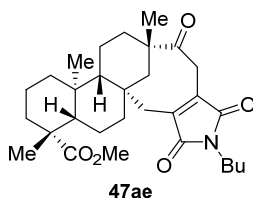

**47ae**, White solid, 42.2 mg, yield 85%.  $^1\text{H NMR}$  (500 MHz,  $\text{CDCl}_3$ )  $\delta$  3.87 (dd,  $J = 18.5, 2.0$  Hz, 1H), 3.68 (s, 3H), 3.49 (t,  $J = 7.5$  Hz, 2H), 3.18 (dd,  $J = 18.5, 2.0$  Hz, 1H), 2.85 (d,  $J = 14.0$  Hz, 1), 2.51 (dq,  $J = 13.0, 3.0$  Hz, 1H), 2.18-2.08 (m, 3H), 1.93 (dd,  $J = 15.0, 3.0$  Hz, 1H), 1.87 (dt,  $J = 14.0, 3.5$  Hz, 1H), 1.81 (dq,  $J = 4.5, 2.5$  Hz, 1H), 1.76 (d,  $J = 12.5$  Hz, 1H), 1.59-1.53 (m, 3H), 1.50-1.41 (m, 2H), 1.36-1.25 (m, 3H), 1.17 (s, 3H), 1.13 (s, 3H), 1.09-1.06 (m, 2H), 1.03-0.96 (m, 3H), 0.92 (t,  $J = 7.5$  Hz, 3H), 0.89-0.82 (m, 2H), 0.68 (s, 3H).  $^{13}\text{C NMR}$  (125 MHz,  $\text{CDCl}_3$ )  $\delta$  212.1, 177.8, 171.7, 170.6, 139.2, 137.5, 58.8, 57.3, 51.3, 49.9, 48.3, 43.9, 40.3, 39.9, 39.8, 38.3, 38.2, 37.5, 37.1, 34.5, 30.7, 29.3, 28.6, 22.6, 20.1, 19.6, 19.1, 18.3, 14.0, 13.7. **HRMS** (ESI):  $m/z$ : calculated for  $\text{C}_{30}\text{H}_{47}\text{N}_2\text{O}_5$ :  $[\text{M} + \text{NH}_4]^+$  515.3479, found: 515.3475.

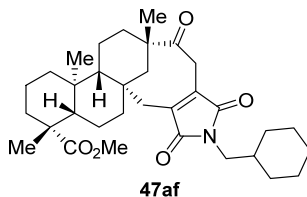

**47af**, White solid, 50.7 mg, yield 89%.  $^1\text{H NMR}$  (500 MHz,  $\text{CDCl}_3$ )  $\delta$  3.87 (dd,  $J = 18.5, 2.0$  Hz, 1H), 3.67 (s, 3H), 3.32 (d,  $J = 7.0$  Hz, 2H), 3.18 (dd,  $J = 18.5, 2.0$  Hz, 1H), 2.85 (d,  $J = 14.0$  Hz, 1H), 2.50 (dq,  $J = 13.0, 3.0$  Hz, 1H), 2.18-2.09 (m, 3H), 1.93 (dd,  $J = 14.5, 2.5$  Hz, 1H), 1.86 (dt,  $J = 13.5, 3.5$  Hz, 1H), 1.81 (dq,  $J = 14.5, 3.0$  Hz, 1H), 1.76-1.59 (m, 9H), 1.50-1.41 (m, 2H), 1.33 (dt,  $J = 13.5, 3.5$  Hz, 1H), 1.22-1.15 (m, 5H), 1.12 (s, 3H), 1.09-1.05 (m, 2H), 1.03-0.82 (m, 7H), 0.67 (s, 3H).  $^{13}\text{C NMR}$  (125 MHz,  $\text{CDCl}_3$ )  $\delta$  212.3, 177.9, 172.0, 171.0, 139.2, 137.5, 59.0, 57.5, 51.4,

50.1, 48.5, 44.7, 44.1, 40.5, 40.0, 39.9, 38.5, 37.7, 37.3, 37.1, 34.7, 30.9 (2 carbons), 29.5, 28.7, 26.4, 25.9, 25.8, 22.8, 19.8, 19.2, 18.5, 14.2. **HRMS** (ESI):  $m/z$ : calculated for  $C_{33}H_{51}N_2O_5$ :  $[M + NH_4]^+$  555.3792, found: 555.3776.

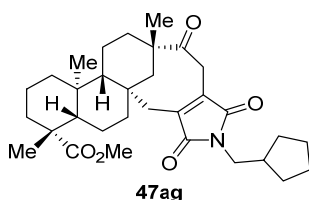

**47ag**, White solid, 42.7 mg, yield 84%.  **$^1H$  NMR** (500 MHz,  $CDCl_3$ )  $\delta$  4.41-4.35 (m, 1H), 3.84 (dd,  $J = 18.5, 2.0$  Hz, 1H), 3.67 (s, 3H), 3.15 (dd,  $J = 18.5, 2.0$  Hz, 1H), 2.83 (d,  $J = 14.0$  Hz, 1H), 2.49 (dq,  $J = 13.5, 3.0$  Hz, 1H), 2.19-2.08 (m, 3H), 1.97-1.79 (m, 9H), 1.75 (d,  $J = 12.5$  Hz, 1H), 1.61-1.56 (m, 3H), 1.49-1.40 (m, 2H), 1.34 (dt,  $J = 13.0, 3.5$  Hz, 1H), 1.17 (s, 3H), 1.11 (s, 3H), 1.08-1.05 (m, 2H), 1.02-0.96 (m, 3H), 0.91-0.82 (m, 2H), 0.67 (s, 3H).  **$^{13}C$  NMR** (125 MHz,  $CDCl_3$ )  $\delta$  212.4, 177.9, 171.7, 170.7, 139.2, 137.5, 59.0, 57.5, 51.5, 51.4, 50.1, 48.4, 44.1, 40.4, 40.4, 39.9, 38.5, 37.6, 37.2, 34.7, 29.8, 29.7, 29.5, 28.7, 24.9 (2 carbons), 22.7, 19.8, 19.2, 18.5, 14.2. **HRMS** (ESI):  $m/z$ : calculated for  $C_{31}H_{47}N_2O_5$ :  $[M + NH_4]^+$  527.2379, found: 527.3470.

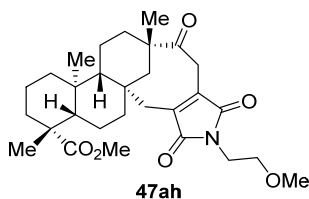

**47ah**, White solid, 49.9 mg, yield 99%.  **$^1H$  NMR** (500 MHz,  $CDCl_3$ )  $\delta$  3.87 (dd,  $J = 18.0, 1.5$  Hz, 1H), 3.71-3.69 (m, 2H), 3.67 (s, 3H), 3.52 (td,  $J = 5.5, 1.5$  Hz, 1H), 3.33 (s, 3H), 3.18 (dd,  $J = 18.0, 1.5$  Hz, 1H), 2.86 (d,  $J = 14.0$  Hz, 1H), 2.50 (dq,  $J = 13.0, 2.5$  Hz, 1H), 2.18-2.08 (m, 3H), 1.93 (dd,  $J = 14.5, 2.5$  Hz, 1H), 1.86 (dt,  $J = 14.0, 4.0$  Hz, 1H), 1.80 (dq,  $J = 15.0, 3.0$  Hz, 1H), 1.75 (d,  $J = 13.0$  Hz, 1H), 1.63-1.58 (m, 1H), 1.49-1.40 (m, 2H), 1.34 (dt,  $J = 13.5, 3.0$  Hz, 1H), 1.16 (s, 3H), 1.11 (s, 3H), 1.08-1.05 (m, 2H), 1.03-0.96 (m, 3H), 0.91-0.82 (m, 2H), 0.67 (s, 3H).  **$^{13}C$  NMR** (125 MHz,  $CDCl_3$ )  $\delta$  212.2, 177.9, 171.6, 170.5, 139.6, 137.8, 69.6, 59.0, 58.9, 57.5, 51.4, 50.0, 48.5, 44.1, 40.4, 40.0, 39.9, 38.5, 37.9, 37.6, 37.3, 34.7, 29.5, 28.7, 22.8, 19.7, 19.2, 18.4, 14.2. **HRMS** (ESI):  $m/z$ : calculated for  $C_{29}H_{42}NO_6$ :  $[M + H]^+$  500.3007, found: 500.3000. LC-MS ( $t_R = 0.71$  min,  $\lambda = 254$  nm, purity >99%).

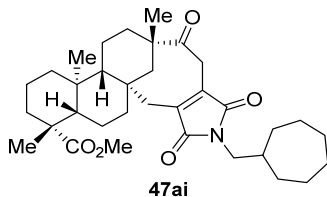

**47ai**, Pale yellow oil, 23.1 mg, yield 42%.  **$^1H$  NMR** (500 MHz,  $CDCl_3$ )  $\delta$  4.14 (tt,  $J = 10.5, 3.5$  Hz, 1H), 3.83 (dd,  $J = 18.0, 1.5$  Hz, 1H), 3.67 (s, 3H), 3.15 (dd,  $J = 18.5, 1.0$  Hz, 1H), 2.82 (d,  $J = 14.0$



Hz, 1H), 2.49 (dq,  $J = 13.0, 3.0$  Hz, 1H), 2.20-2.12 (m, 4H), 2.07 (d,  $J = 14.5$  Hz, 1H), 1.93 (dd,  $J = 14.5, 2.5$  Hz, 1H), 1.88-1.43 (m, 18H), 1.33 (dt,  $J = 13.5, 3.0$  Hz, 1H), 1.16 (s, 3H), 1.11 (s, 3H), 1.08-1.05 (m, 2H), 1.02-0.96 (m, 3H), 0.91-0.82 (m, 2H), 0.66 (s, 3H).  $^{13}\text{C NMR}$  (125 MHz,  $\text{CDCl}_3$ )  $\delta$  212.4, 177.9, 171.5, 170.5, 139.0, 137.4, 59.0, 57.5, 52.0, 51.4, 50.1, 48.4, 44.1, 40.5, 40.0, 39.9, 38.5, 37.6, 37.3, 34.7, 32.0, 29.5, 28.7, 26.5 (2 carbons), 26.1, 25.3, 25.2, 22.7, 19.8, 19.2, 18.5, 14.2. **HRMS** (ESI):  $m/z$ : calculated for  $\text{C}_{34}\text{H}_{50}\text{NO}_5$ :  $[\text{M} + \text{H}]^+$  552.3684, found: 552.3673.

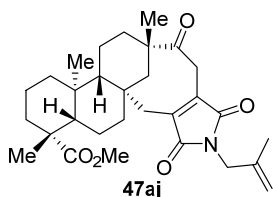

**47aj**, White solid, 39.6 mg, yield 81% with 2-methyl allylamine HCl salt and  $\text{Et}_3\text{N}$ .  $^1\text{H NMR}$  (500 MHz,  $\text{CDCl}_3$ )  $\delta$  4.87-4.86 (m, 1H), 4.73 (s, 1H), 4.03 (s, 2H), 3.89 (dd,  $J = 18.0, 1.5$  Hz, 1H), 3.66 (s, 3H), 3.20 (dd,  $J = 18.0, 1.5$  Hz, 1H), 2.87 (d,  $J = 14.5$  Hz, 1H), 2.51 (dq,  $J = 13.0, 2.5$  Hz, 1H), 2.18-2.08 (m, 3H), 1.92 (dd,  $J = 14.5, 2.5$  Hz, 1H), 1.86 (dt,  $J = 14.0, 4.0$  Hz, 1H), 1.82-1.74 (m, 2H), 1.72 (s, 3H), 1.62-1.58 (m, 1H), 1.50-1.41 (m, 2H), 1.33 (dt,  $J = 13.0, 3.0$  Hz, 1H), 1.16 (s, 3H), 1.12 (s, 3H), 1.10-1.05 (m, 2H), 1.04-0.96 (m, 3H), 0.92-0.82 (m, 2H), 0.67 (s, 3H);  $^{13}\text{C NMR}$  (125 MHz,  $\text{CDCl}_3$ )  $\delta$  212.2, 177.9, 171.4, 170.3, 139.7, 139.6, 137.7, 112.0, 59.0, 57.5, 51.4, 50.1, 48.5, 44.1, 43.8, 40.4, 40.1, 39.9, 38.5, 37.6, 37.3, 34.7, 29.5, 28.7, 22.8, 20.4, 19.8, 19.2, 18.4, 14.2; **HRMS** (ESI):  $m/z$ : calculated for  $\text{C}_{30}\text{H}_{41}\text{NO}_5\text{Na}$ :  $[\text{M} + \text{Na}]^+$  518.2877, found 518.2876.

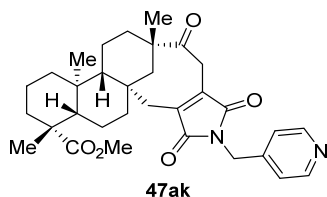

**47ak**, White solid, 53.2 mg, yield 99%.  $^1\text{H NMR}$  (500 MHz,  $\text{CDCl}_3$ )  $\delta$  8.56 (dd,  $J = 4.5, 1.5$  Hz, 2H), 7.19 (dd,  $J = 4.5, 2.0$  Hz, 2H), 4.68 (AB,  $J = 15.5$  Hz, 1H), 4.62 (AB,  $J = 15.0$  Hz, 1H), 3.88 (dd,  $J = 18.5, 1.5$  Hz, 1H), 3.67 (s, 3H), 3.20 (dd,  $J = 18.5, 1.5$  Hz, 1H), 2.87 (d,  $J = 14.0$  Hz, 1H), 2.50 (dq,  $J = 13.0, 2.5$  Hz, 1H), 2.18-2.08 (m, 3H), 1.92 (dd,  $J = 14.5, 2.5$  Hz, 1H), 1.88-1.79 (m, 2H), 1.75 (d,  $J = 13.0$  Hz, 1H), 1.63-1.59 (m, 1H), 1.49-1.40 (m, 2H), 1.32 (dt,  $J = 13.5, 3.0$  Hz, 1H), 1.17 (s, 3H), 1.12 (s, 3H), 1.11-1.05 (s, 2H), 1.04-0.96 (m, 3H), 0.94-0.82 (m, 2H), 0.66 (s, 3H).  $^{13}\text{C NMR}$  (125 MHz,  $\text{CDCl}_3$ )  $\delta$  211.8, 177.8, 171.0, 170.0, 150.5, 145.0, 140.0, 138.2, 122.9, 58.9, 57.5, 51.4, 50.0, 48.5, 44.1, 40.9, 40.4, 40.1, 40.0, 38.4, 37.6, 37.3, 34.6, 29.4, 28.7, 22.9, 19.7, 19.2, 18.4, 14.2. **HRMS** (ESI):  $m/z$ : calculated for  $\text{C}_{32}\text{H}_{41}\text{N}_2\text{O}_5$ :  $[\text{M} + \text{H}]^+$  533.3010, found: 533.3010. LC-MS ( $t_{\text{R}} = 0.46$  min,  $\lambda = 254$  nm, purity 99%).

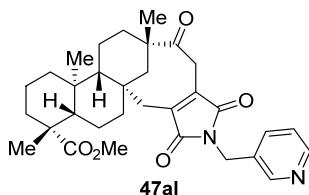

**47al**, Light yellow solid, 51.0 mg, yield 96%.  $^1\text{H NMR}$  (500 MHz,  $\text{CDCl}_3$ )  $\delta$  8.62 (s, 1H), 8.54 (d,  $J = 4.0$  Hz, 1H), 7.66 (dt,  $J = 8.0, 2.0$  Hz, 1H), 7.26 (dd,  $J = 8.0, 4.5$  Hz, 1H), 4.69 (d,  $J = 15.0$  Hz, 1H), 4.63 (d,  $J = 15.0$  Hz, 1H), 3.86 (dd,  $J = 18.5, 1.5$  Hz, 1H), 3.67 (s, 3H), 3.17 (dd,  $J = 18.5, 1.5$  Hz, 1H), 2.85 (d,  $J = 14.5$  Hz, 1H), 2.49 (dq,  $J = 13.5, 3.0$  Hz, 1H), 2.18-2.09 (m, 3H), 1.90 (dd,  $J = 14.5, 3.0$  Hz, 1H), 1.87-1.69 (m, 4H), 1.61-1.58 (m, 1H), 1.48-1.39 (m, 2H), 1.31 (dt,  $J = 13.5, 3.0$  Hz, 1H), 1.17 (s, 3H), 1.11 (s, 3H), 1.09-1.05 (m, 2H), 1.03-0.96 (m, 3H), 0.91-0.81 (m, 2H), 0.66 (s, 3H);  $^{13}\text{C NMR}$  (125 MHz,  $\text{CDCl}_3$ )  $\delta$  211.9, 177.9, 171.1, 170.0, 150.0, 19.6, 139.9, 18.1, 136.3, 132.1, 123.8, 58.9, 57.4, 51.4, 50.0, 8.5, 44.1, 40.4, 40.1, 39.9, 39.6, 38.4, 37.6, 37.2, 34.6, 29.4, 28.7, 22.9, 19.7, 19.2, 18.4, 14.2; **HRMS** (ESI):  $m/z$ : calculated for  $\text{C}_{32}\text{H}_{40}\text{N}_2\text{O}_5\text{Na}$ :  $[\text{M} + \text{Na}]^+$  555.2829, found 555.2827. LC-MS ( $t_{\text{R}} = 0.56$  min,  $\lambda = 254$  nm, purity 98%).

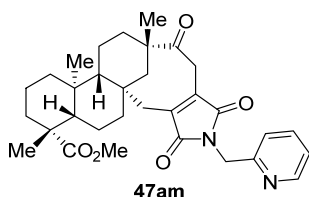

**47am**, Light yellow solid, 53.2 mg, yield 99%.  $^1\text{H NMR}$  (500 MHz,  $\text{CDCl}_3$ )  $\delta$  8.52 (ddd,  $J = 5.0, 2.0, 1.0$  Hz, 1H), 7.63 (ddd,  $J = 8.0, 8.0, 2.0$  Hz, 1H), 7.19 (d,  $J = 8.0$  Hz, 1H), 7.16 (ddd,  $J = 7.5, 5.0, 0.5$  Hz, 1H), 4.82 (s, 2H), 3.91 (dd,  $J = 18.0, 1.5$  Hz, 1H), 3.64 (s, 3H), 3.22 (dd,  $J = 18.0, 1.5$  Hz, 1H), 2.89 (d,  $J = 14.0$  Hz, 1H), 2.51 (dq,  $J = 13.0, 3.0$  Hz, 1H), 2.17-2.06 (m, 3H), 1.98 (dd,  $J = 15.0, 3.0$  Hz, 1H), 1.86 (dt,  $J = 14.0, 3.5$  Hz, 1H), 1.81-1.74 (m, 2H), 1.62-1.60 (m, 1H), 1.50-1.37 (m, 3H), 1.15 (s, 3H), 1.13 (s, 3H), 1.11-1.03 (m, 2H), 1.01-0.95 (m, 3H), 0.92-0.82 (m, 2H), 0.66 (s, 3H);  $^{13}\text{C NMR}$  (125 MHz,  $\text{CDCl}_3$ )  $\delta$  212.2, 177.9, 171.6, 170.5, 155.5, 149.9, 139.9, 138.1, 136.9, 122.7, 121.5, 59.0, 57.5, 51.4, 50.0, 48.5, 44.0, 43.4, 40.4, 40.1, 39.8, 38.5, 37.6, 37.4, 34.7, 29.5, 28.7, 22.9, 19.8, 19.2, 18.5, 14.1; **HRMS** (ESI):  $m/z$ : calculated for  $\text{C}_{32}\text{H}_{40}\text{N}_2\text{O}_5\text{Na}$ :  $[\text{M} + \text{Na}]^+$  555.2829, found 555.2825. LC-MS ( $t_{\text{R}} = 0.64$  min,  $\lambda = 254$  nm, purity 99%).

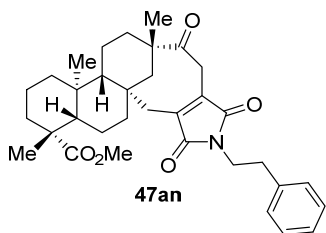

**47an**, White solid, 51.8 mg, yield 95%.  $^1\text{H NMR}$  (500 MHz,  $\text{CDCl}_3$ )  $\delta$  7.31-7.27 (m, 2H), 7.23-7.19 (m, 3H), 3.82 (dd,  $J = 18.5, 1.5$  Hz, 1H), 3.74 (ddd,  $J = 8.5, 7.0, 4.0$  Hz, 1H), 3.68 (s, 3H), 3.14 (dd,  $J = 18.5, 1.5$  Hz, 1H), 2.89 (t,  $J = 8.0$  Hz, 2H), 2.82 (d,  $J = 14.0$  Hz, 1H), 2.50 (dq,  $J = 13.5, 3.0$  Hz, 1H), 2.19-2.06 (m, 3H), 1.90-1.74 (m, 4H), 1.61-1.58 (m, 1H), 1.48-1.40 (m, 2H), 1.77 (dt,  $J = 13.5, 3.0$  Hz, 1H), 1.17 (s, 3H), 1.11 (s, 3H), 1.08-0.96 (m, 5H), 0.89-0.82 (m, 2H), 0.67 (s, 3H);  $^{13}\text{C NMR}$  (125 MHz,  $\text{CDCl}_3$ )  $\delta$  212.2, 177.9, 171.5, 170.4, 139.4, 138.1, 137.6, 129.1, 128.8, 126.9, 59.0, 57.5, 51.4, 50.0, 48.5, 44.1, 40.4, 40.0, 39.9, 39.7, 38.5, 37.6, 37.2, 34.8, 34.7, 29.5, 28.7, 22.7, 19.7, 19.2, 18.4, 14.2; **HRMS** (ESI):  $m/z$ : calculated for  $\text{C}_{34}\text{H}_{43}\text{NO}_5\text{Na}$ :  $[\text{M} + \text{Na}]^+$  568.3033, found 568.3045.

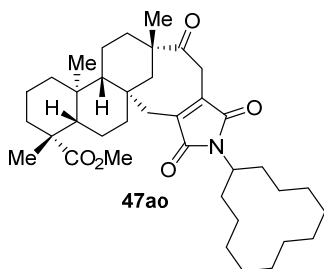

**47ao**, Light brown oil, 22.2 mg, yield 40%.  $^1\text{H NMR}$  (500 MHz,  $\text{CDCl}_3$ )  $\delta$  4.24-4.18 (m, 1H), 3.84 (dd,  $J = 18.0, 1.5$  Hz, 1H), 3.68 (s, 3H), 3.16 (dd,  $J = 18.5, 1.0$  Hz, 1H), 2.83 (d,  $J = 14.0$  Hz, 1H), 2.50 (dq,  $J = 13.0, 2.5$  Hz, 1H), 2.18-2.06 (m, 3H), 2.02-1.97 (m, 2H), 1.93 (dd,  $J = 14.5, 2.5$  Hz, 1H), 1.88-1.74 (m, 3H), 1.62-1.59 (m, 3H), 1.50-1.25 (m, 21H), 1.17 (s, 3H), 1.12 (s, 3H), 1.06 (d,  $J = 14.5$  Hz, 2H), 1.02-0.97 (m, 3H), 0.90-0.82 (m, 2H), 0.67 (s, 3H);  $^{13}\text{C NMR}$  (125 MHz,  $\text{CDCl}_3$ )  $\delta$  212.5, 177.9, 171.9, 171.0, 139.0, 137.3, 59.1, 57.5, 51.5, 50.2, 48.5, 47.4, 44.1, 40.5, 40.0, 38.5, 37.6, 37.3, 34.7, 29.5, 28.7, 28.4, 24.4, 24.3, 24.2 (2 carbons), 22.9, 22.8 (2 carbons), 22.7, 19.8, 19.3, 18.5, 14.2; **HRMS** (ESI):  $m/z$ : calculated for  $\text{C}_{38}\text{H}_{57}\text{NO}_5\text{Na}$ :  $[\text{M} + \text{Na}]^+$  580.3972, found 580.3970.

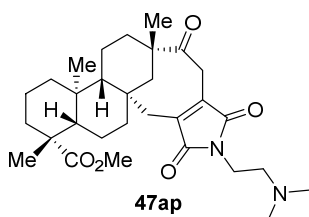

**47ap**, Pale yellow solid, 49.2 mg, yield 96%.  $^1\text{H NMR}$  (500 MHz,  $\text{CDCl}_3$ )  $\delta$  3.86 (dd,  $J = 18.5, 1.5$  Hz, 1H), 3.67 (s, 3H), 3.63-3.56 (m, 2H), 3.17 (dd,  $J = 18.5, 1.5$  Hz, 1H), 2.85 (d,  $J = 14.0$  Hz, 1H), 2.51-2.41 (m, 3H), 2.24 (s, 6H), 2.18-2.07 (m, 3H), 1.93 (dd,  $J = 14.5, 2.5$  Hz, 1H), 1.88-1.79 (m, 2H), 1.75 (d,  $J = 13.0$  Hz, 1H), 1.61-1.58 (m, 1H), 1.49-1.40 (m, 2H), 1.34 (dt,  $J = 13.5, 3.0$  Hz, 1H), 1.16 (s, 3H), 1.11 (s, 3H), 1.08-1.05 (m, 2H), 1.02-0.97 (m, 3H), 0.90-0.82 (m, 2H), 0.67 (s, 3H);  $^{13}\text{C NMR}$  (125 MHz,  $\text{CDCl}_3$ )  $\delta$  212.2, 177.9, 171.7, 170.6, 139.5, 137.7, 59.0, 57.5, 57.4, 51.4, 50.0, 48.5, 46.7, 44.1, 40.4, 40.0, 39.9, 38.5, 37.6, 37.3, 36.5, 34.7, 29.5, 28.7, 22.8, 19.7, 19.2, 18.4, 14.2; **HRMS** (ESI):  $m/z$ : calculated for  $\text{C}_{30}\text{H}_{45}\text{N}_2\text{O}_5$ :  $[\text{M} + \text{H}]^+$  513.3323, found 513.3340.

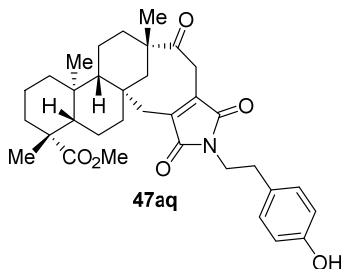

**47aq**, White solid, 56.1 mg, yield 99%.  $^1\text{H NMR}$  (500 MHz,  $\text{CDCl}_3$ )  $\delta$  7.05 (d,  $J = 8.5$  Hz, 2H), 6.75 (d,  $J = 8.5$  Hz, 2H), 5.09 (s, 1H), 3.82 (dd,  $J = 18.0, 1.5$  Hz, 1H), 3.71-3.68 (m, 5H), 3.14 (dd,  $J = 18.0, 1.5$  Hz, 1H), 2.83-2.80 (m, 3H), 2.49 (dq,  $J = 13.5, 2.5$  Hz, 1H), 2.18-2.06 (m, 3H), 1.89-1.74 (m, 4H), 1.62-1.58 (m, 1H), 1.46-1.43 (m, 2H), 1.27 (dt,  $J = 13.5, 3.0$  Hz, 1H), 1.17 (s, 3H), 1.11 (s, 3H), 1.08-0.97 (m, 5H), 0.90-0.82 (m, 2H), 0.66 (s, 3H);  $^{13}\text{C NMR}$  (125 MHz,  $\text{CDCl}_3$ )  $\delta$

212.1, 177.9, 171.4, 170.3, 154.5, 139.3, 137.5, 130.1, 130.0, 115.5, 58.8, 57.3, 51.3, 49.9, 48.3, 43.9, 40.3, 39.9, 39.8, 39.7, 38.3, 37.5, 37.1, 34.6, 33.7, 29.4, 28.6, 22.6, 19.6, 19.1, 18.3, 14.1; **HRMS** (ESI):  $m/z$ : calculated for  $C_{34}H_{43}NO_6Na$ :  $[M + Na]^+$  584.2983, found 584.2980. LC-MS ( $t_R$  = 0.73 min,  $\lambda$  = 254 nm, purity 99%).

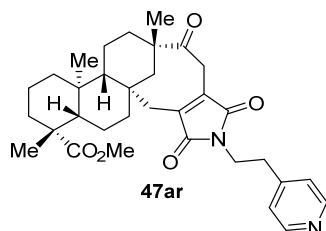

**47ar**, White solid, 51.8 mg, yield 95%.  **$^1H$  NMR** (500 MHz,  $CDCl_3$ )  $\delta$  8.52 (d,  $J$  = 5.0 Hz, 2H), 7.13 (dd,  $J$  = 4.5, 2.0 Hz, 2H), 3.82 (dd,  $J$  = 18.5, 1.5 Hz, 1H), 3.77 (td,  $J$  = 7.5, 2.0 Hz, 2H), 3.68 (s, 3H), 3.14 (dd,  $J$  = 18.0, 1.0 Hz, 1H), 2.92 (t,  $J$  = 7.5 Hz, 2H), 2.80 (d,  $J$  = 14.0 Hz, 1H), 2.49 (dq,  $J$  = 13.5, 2.5 Hz, 1H), 2.16 (d,  $J$  = 13.5 Hz, 1H), 2.11-2.06 (m, 2H), 1.89-1.75 (m, 4H), 1.61-1.58 (m, 1H), 1.46-1.38 (m, 2H), 1.21 (dt,  $J$  = 13.5, 3.0 Hz, 1H), 1.17 (s, 3H), 1.11 (s, 3H), 1.07-0.96 (m, 5H), 0.86 (qd,  $J$  = 13.0, 3.5 Hz, 2H), 0.66 (s, 3H);  **$^{13}C$  NMR** (125 MHz,  $CDCl_3$ )  $\delta$  212.0, 177.9, 171.3, 170.2, 150.2, 147.0, 139.6, 137.7, 124.4, 58.9, 57.4, 51.4, 50.0, 48.5, 44.1, 40.4, 40.0, 39.9, 38.5, 38.4, 37.6, 37.2, 34.6, 33.9, 29.5, 28.7, 22.8, 19.7, 19.2, 18.4, 14.2; **HRMS** (ESI):  $m/z$ : calculated for  $C_{33}H_{43}N_2O_5$ :  $[M + H]^+$  547.3166, found 547.3172. LC-MS ( $t_R$  = 0.37 min,  $\lambda$  = 254 nm, purity >99%).

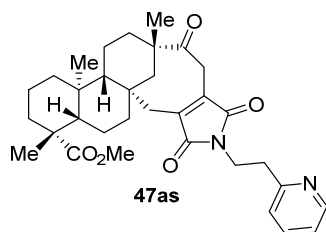

**47as**, White solid, 40.9 mg, yield 95%.  **$^1H$  NMR** (500 MHz,  $CDCl_3$ )  $\delta$  8.51 (ddd,  $J$  = 5.0, 1.0, 1.0 Hz, 1H), 5.89 (ddd,  $J$  = 7.5, 7.5, 2.0 Hz, 1H), 7.14-7.11 (m, 2H), 3.95-3.86 (m, 1H), 3.83 (dd,  $J$  = 18.0, 1.5 Hz, 1H), 3.67 (s, 3H), 3.13 (dd,  $J$  = 18.5, 1.5 Hz, 1H), 3.07 (t,  $J$  = 7.0 Hz, 2H), 2.81 (d,  $J$  = 14.5 Hz, 1H), 2.49 (dq,  $J$  = 13.5, 3.0 Hz, 1H), 2.16 (d,  $J$  = 13.5 Hz, 1H), 2.11-2.05 (m, 2H), 1.92-1.73 (m, 4H), 1.61-1.58 (m, 1H), 1.48-1.39 (m, 2H), 1.29 (dt,  $J$  = 13.5, 3.0 Hz, 1H), 1.16 (s, 3H), 1.10 (s, 3H), 1.07 (s, 1H), 1.04 (s, 1H), 0.99 (td,  $J$  = 13.5, 4.5 Hz, 2H), 0.88-0.81 (m, 2H), 0.66 (s, 3H);  **$^{13}C$  NMR** (125 MHz,  $CDCl_3$ )  $\delta$  212.7, 177.9, 171.4, 170.3, 158.5, 149.7, 139.4, 137.6, 136.6, 123.4, 121.8, 59.0, 57.5, 51.4, 50.0, 48.5, 44.1, 40.4, 40.0, 39.8, 38.5, 38.3, 37.6, 37.2, 36.8, 34.7, 29.5, 28.7, 22.7, 19.7, 19.2, 18.4, 14.2; **HRMS** (ESI):  $m/z$ : calculated for  $C_{33}H_{43}N_2O_5$ :  $[M + H]^+$  547.3166, found 547.3184. LC-MS ( $t_R$  = 0.50 min,  $\lambda$  = 210 nm, purity >99%).

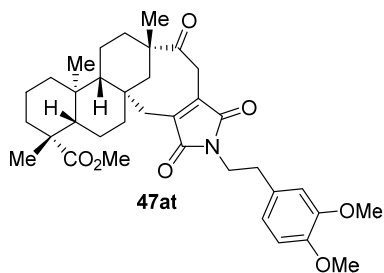

**47at**, White solid, 59.8 mg, yield 99%. **<sup>1</sup>H NMR** (500 MHz, CDCl<sub>3</sub>) δ 6.78 (d, *J* = 8.0 Hz, 1H), 6.74-6.71 (m, 2H), 3.87 (s, 3H), 3.85-3.81 (m, 4H), 3.77-3.70 (m, 2H), 3.68 (s, 3H), 3.14 (dd, *J* = 18.5, 1.5 Hz, 1H), 2.89-2.79 (m, 3H), 2.49 (dq, *J* = 13.0, 3.0 Hz, 1H), 2.17 (d, *J* = 14.0 Hz, 1H), 2.12-2.05 (m, 2H), 1.90-1.73 (m, 4H), 1.60-1.58 (m, 1H), 1.45-1.39 (m, 2H), 1.23 (dt, *J* = 13.5, 3.0 Hz, 1H), 1.17 (s, 3H), 1.11 (s, 3H), 1.07-0.96 (m, 5H), 0.87-0.81 (m, 2H), 0.66 (s, 3H); **<sup>13</sup>C NMR** (125 MHz, CDCl<sub>3</sub>) δ 212.1, 177.9, 171.5, 170.5, 149.1, 148.0, 139.4, 137.6, 130.6, 121.1, 112.1, 111.4, 58.9, 57.5, 56.1 (2 carbons), 51.4, 50.0, 48.4, 44.1, 40.4, 40.0, 39.8, 38.4, 37.6, 37.2, 34.7, 34.3, 29.5, 28.7, 22.7, 19.7, 19.2, 18.5, 14.2; **HRMS** (ESI): *m/z*: calculated for C<sub>36</sub>H<sub>47</sub>NO<sub>7</sub>Na: [M + Na]<sup>+</sup> 628.3245, found 628.3252.

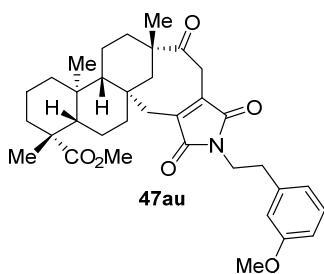

**47au**, White solid, 56.9 mg, yield 99%. **<sup>1</sup>H NMR** (500 MHz, CDCl<sub>3</sub>) δ 7.20 (t, *J* = 7.5 Hz, 1H), 6.79 (d, *J* = 5.0 Hz, 1H), 6.77-6.74 (m, 2H), 3.83 (dd, *J* = 18.0, 1.0 Hz, 1H), 3.80 (s, 3H), 3.77-3.70 (m, 2H), 3.68 (s, 3H), 3.14 (dd, *J* = 18.0, 1.0 Hz, 1H), 2.87 (t, *J* = 8.0 Hz, 1H), 2.82 (d, *J* = 14.0 Hz, 1H), 2.50 (dt, *J* = 13.5, 3.0 Hz, 1H), 2.18-2.06 (m, 3H), 1.90-1.84 (m, 2H), 1.82-1.74 (m, 2H), 1.61-1.59 (m, 1H), 1.26 (dt, *J* = 13.5, 3.0 Hz, 1H), 1.17 (s, 3H), 1.11 (s, 3H), 1.08-1.01 (m, 3H), 0.99-0.96 (m, 2H), 0.88-0.82 (m, 2H), 0.67 (s, 3H); **<sup>13</sup>C NMR** (125 MHz, CDCl<sub>3</sub>) δ 212.2, 177.9, 171.5, 170.4, 159.9, 139.7, 139.4, 137.7, 129.8, 121.4, 114.6, 112.4, 59.0, 57.5, 55.4, 51.4, 50.0, 48.5, 44.1, 40.4, 40.0, 39.9, 39.6, 38.5, 37.6, 37.2, 34.8, 34.7, 39.5, 28.7, 22.7, 19.7, 19.2, 18.4, 14.2; **HRMS** (ESI): *m/z*: calculated for C<sub>35</sub>H<sub>45</sub>NO<sub>6</sub>Na: [M + Na]<sup>+</sup> 598.3139, found 598.3133.

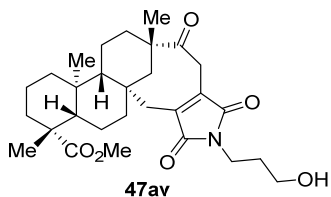

**47av**, White solid, 49.4 mg, yield 99%. **<sup>1</sup>H NMR** (500 MHz, CDCl<sub>3</sub>) δ 3.87 (dd, *J* = 18.5, 1.5 Hz, 1H), 3.67-3.65 (m, 5H), 3.57 (dt, *J* = 5.5, 5.5 Hz, 2H), 3.18 (dd, *J* = 18.5, 1.5 Hz, 1H), 2.85 (d, *J* = 14.0 Hz, 1H), 2.50 (dq, *J* = 13.0, 3.0 Hz, 1H), 2.30 (t, *J* = 6.0 Hz, 1H), 2.18-2.08 (m, 3H), 1.92 (dd, *J* = 15.0, 3.0 Hz, 1H), 1.88-1.74 (m, 5H), 1.62-1.58 (m, 1H), 1.49-1.40 (m, 2H), 1.32 (dt, *J* = 13.5,

3.0 Hz, 1H), 1.16 (s, 3H), 1.12 (s, 3H), 1.08 (d,  $J = 14.5$  Hz, 1H), 1.06 (dd,  $J = 12.5, 2.5$  Hz, 1H), 1.03-0.96 (m, 3H), 0.92-0.82 (m, 2H), 0.67 (s, 3H);  $^{13}\text{C NMR}$  (125 MHz,  $\text{CDCl}_3$ )  $\delta$  212.0, 177.9, 172.3, 171.0, 139.7, 137.9, 59.3, 58.9, 57.5, 51.4, 50.0, 48.5, 44.1, 40.4, 40.1, 39.9, 38.4, 37.6, 37.2, 34.7, 34.6, 31.5, 29.5, 28.7, 22.8, 19.7, 19.2, 18.4, 14.2; **HRMS** (ESI):  $m/z$ : calculated for  $\text{C}_{29}\text{H}_{41}\text{NO}_6\text{Na}$ :  $[\text{M} + \text{Na}]^+$  522.2826, found 522.2829. LC-MS ( $t_{\text{R}} = 0.57$  min,  $\lambda = 254$  nm, purity >99%).

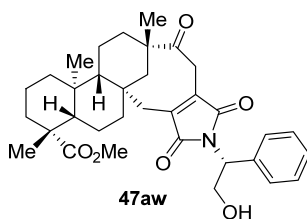

**47aw**, White solid, 55.6 mg, yield 99%.  $^1\text{H NMR}$  (500 MHz,  $\text{CDCl}_3$ )  $\delta$  7.38-7.29 (m, 5H), 5.24 (dd,  $J = 9.0, 5.0$  Hz, 1H), 4.50 (ddd,  $J = 11.2, 9.0, 8.0$  Hz, 1H), 4.11 (dt,  $J = 11.5, 5.0$  Hz, 1H), 3.86 (dd,  $J = 18.5, 1.5$  Hz, 1H), 3.67 (s, 3H), 3.16 (dd,  $J = 18.5, 1.5$  Hz, 1H), 2.87 (d,  $J = 14.5$  Hz, 1H), 2.49 (dq,  $J = 13.5, 3.0$  Hz, 1H), 2.31 (dd,  $J = 8.0, 5.0$  Hz, 1H), 2.18-2.09 (m, 3H), 1.93 (dd,  $J = 14.5, 2.5$  Hz, 1H), 1.90-1.74 (m, 3H), 1.61-1.59 (m, 1H), 1.49-1.40 (m, 2H), 1.32 (dt,  $J = 13.5, 3.0$  Hz, 1H), 1.17 (s, 3H), 1.11 (s, 3H), 1.08 (d,  $J = 14.5$  Hz, 1H), 1.06 (dd,  $J = 13.0, 2.5$  Hz, 1H), 1.03-0.97 (m, 3H), 0.91-0.82 (m, 2H), 0.66 (s, 3H);  $^{13}\text{C NMR}$  (125 MHz,  $\text{CDCl}_3$ )  $\delta$  212.1, 177.9, 172.0, 170.9, 139.7, 137.8, 136.9, 129.0, 128.4, 127.9, 62.4, 59.0, 57.8, 57.5, 51.5, 50.0, 48.5, 44.1, 40.4, 40.1, 39.9, 38.4, 37.6, 37.3, 34.7, 29.4, 28.7, 22.9, 19.8, 19.2, 18.4, 14.2; **HRMS** (ESI):  $m/z$ : calculated for  $\text{C}_{34}\text{H}_{43}\text{NO}_6\text{Na}$ :  $[\text{M} + \text{Na}]^+$  584.2983, found 584.2989. LC-MS ( $t_{\text{R}} = 0.91$  min,  $\lambda = 254$  nm, purity >99%).

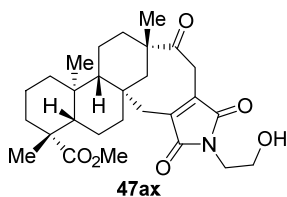

**47ax**, White solid, 47.9 mg, yield 99%.  $^1\text{H NMR}$  (500 MHz,  $\text{CDCl}_3$ )  $\delta$  3.87 (dd,  $J = 18.5, 1.5$  Hz, 1H), 3.80-3.77 (m, 2H), 3.72-3.70 (m, 2H), 3.67 (s, 3H), 3.18 (dd,  $J = 18.5, 1.5$  Hz, 1H), 2.87 (d,  $J = 14.0$  Hz, 1H), 2.50 (dq,  $J = 13.5, 3.5$  Hz, 1H), 2.18-2.08 (m, 4H), 1.94 (dd,  $J = 14.5, 2.5$  Hz, 1H), 1.86 (qt,  $J = 14.0, 4.0$  Hz, 1H), 1.80 (dq,  $J = 15.0, 3.5$  Hz, 1H), 1.75 (d,  $J = 13.5$  Hz, 1H), 1.62-1.159 (m, 1H), 1.49-1.40 (m, 2H), 1.34 (dt,  $J = 13.5, 3.5$  Hz, 1H), 1.17 (s, 3H), 1.12 (s, 3H), 1.09 (dd,  $J = 14.5, 1.5$  Hz, 1H), 1.07 (dd,  $J = 13.0, 2.5$  Hz, 1H), 1.04-0.96 (m, 3H), 0.93-0.82 (m, 3H), 0.67 (m, 3H);  $^{13}\text{C NMR}$  (125 MHz,  $\text{CDCl}_3$ )  $\delta$  212.0, 177.9, 172.1, 171.0, 139.8, 138.0, 61.3, 59.0, 57.5, 51.4, 50.0, 48.5, 44.1, 41.4, 40.4, 40.1, 39.9, 38.4, 37.6, 37.3, 34.6, 29.5, 28.7, 22.9, 19.7, 19.2, 18.4, 14.2; **HRMS** (ESI):  $m/z$ : calculated for  $\text{C}_{28}\text{H}_{40}\text{NO}_6$ :  $[\text{M} + \text{H}]^+$  486.2850, found 486.2853. LC-MS ( $t_{\text{R}} = 0.51$  min,  $\lambda = 254$  nm, purity 97%).

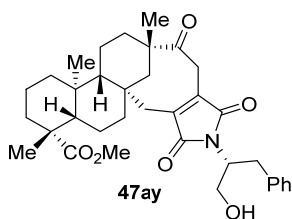

**47ay**, White solid, 51.7 mg, yield 90%.  $^1\text{H NMR}$  (500 MHz,  $\text{CDCl}_3$ )  $\delta$  7.27-7.24 (m, 2H), 7.20-7.16 (m, 3H), 4.42 (dtd,  $J=9.0, 7.0, 3.5$  Hz, 1H), 4.01-3.95 (m, 1H), 3.85 (dt,  $J=12.0, 3.5$  Hz, 1H), 3.89 (dd,  $J=18.5, 1.5$  Hz, 1H), 3.66 (s, 3H), 3.14-3.05 (m, 3H), 2.73 (d,  $J=14.0$  Hz, 1H), 2.59 (dd,  $J=8.5, 1.5$  Hz, 1H), 2.47 (dq,  $J=13.5, 3.0$  Hz, 1H), 2.16 (d,  $J=13.5$  Hz, 1H), 2.07-2.00 (m, 2H), 1.84 (qt,  $J=13.5, 3.5$  Hz, 1H), 1.74-1.70 (m, 3H), 1.59-1.56 (m, 1H), 1.45-1.36 (m, 2H), 1.17 (s, 3H), 1.10 (s, 3H), 1.05-0.92 (m, 6H), 0.83 (td,  $J=13.5, 4.0$  Hz, 1H), 0.74 (t,  $J=13.5$  Hz, 1H), 0.63 (s, 3H);  $^{13}\text{C NMR}$  (125 MHz,  $\text{CDCl}_3$ )  $\delta$  212.0, 177.9, 171.8, 171.2, 139.3, 137.6 (2 carbons), 129.3, 128.8, 127.0, 63.2, 58.9, 57.4, 55.5, 51.4, 49.9, 48.4, 44.1, 40.4, 39.9, 39.7, 38.5, 37.6, 37.1, 34.9, 34.7, 29.5, 28.8, 22.8, 19.7, 19.2, 18.4, 14.2; **HRMS** (ESI):  $m/z$ : calculated for  $\text{C}_{35}\text{H}_{46}\text{NO}_6$ :  $[\text{M} + \text{H}]^+$  576.3320, found 576.3330. LC-MS ( $t_{\text{R}}=0.94$  min,  $\lambda=254$  nm, purity >99%).

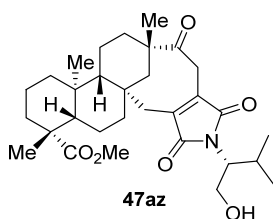

**47az**, White solid, 37.9 mg, yield 72%.  $^1\text{H NMR}$  (500 MHz,  $\text{CDCl}_3$ )  $\delta$  4.03 (ddd,  $J=12.0, 9.0, 7.0$  Hz, 1H), 3.87 (dd,  $J=18.5, 1.5$  Hz, 1H), 3.82-3.74 (m, 2H), 3.67 (s, 3H), 3.18 (dd,  $J=18.5, 1.5$  Hz, 1H), 2.85 (d,  $J=14.0$  Hz, 1H), 2.72 (dd,  $J=9.5, 3.0$  Hz, 1H), 2.50 (dq,  $J=13.5, 3.0$  Hz, 1H), 2.37-2.30 (m, 1H), 2.19-2.08 (m, 3H), 1.92 (dd,  $J=14.5, 3.0$  Hz, 1H), 1.88-1.7 (m, 3H), 1.62-1.59 (m, 1H), 1.49-1.41 (m, 2H), 1.31 (dt,  $J=13.0, 3.5$  Hz, 1H), 1.17 (s, 3H), 1.12 (s, 3H), 1.10-0.96 (m, 8H), 0.92-0.82 (m, 2H), 0.80 (d,  $J=7.0$  Hz, 3H), 0.67 (s, 3H);  $^{13}\text{C NMR}$  (125 MHz,  $\text{CDCl}_3$ )  $\delta$  212.1, 177.9, 172.6, 171.5, 139.4, 137.5, 62.4, 60.3, 58.9, 57.5, 51.4, 50.0, 48.5, 44.1, 40.4, 40.1, 39.9, 38.4, 37.6, 37.3, 34.7, 29.5, 28.7, 27.3, 22.8, 20.2, 20.0, 19.8, 19.2, 18.4, 14.2; **HRMS** (ESI):  $m/z$ : calculated for  $\text{C}_{31}\text{H}_{45}\text{NO}_6\text{Na}$ :  $[\text{M} + \text{Na}]^+$  550.3139, found 550.3147. LC-MS ( $t_{\text{R}}=0.90$  min,  $\lambda=254$  nm, purity >99%).

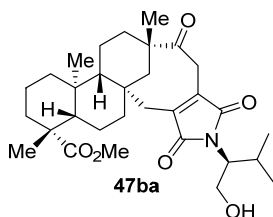

**47ba**, White solid, 44.7 mg, yield 85%.  $^1\text{H NMR}$  (500 MHz,  $\text{CDCl}_3$ )  $\delta$  4.02 (ddd,  $J=12.0, 9.0, 7.0$  Hz, 1H), 3.87 (dd,  $J=18.5, 1.5$  Hz, 1H), 3.81 (dt,  $J=12.0, 3.0$  Hz, 1H), 3.75 (ddd,  $J=10.5, 7.5, 3.0$  Hz, 1H), 3.67 (s, 3H), 3.17 (dd,  $J=18.5, 1.0$  Hz, 1H), 2.86 (d,  $J=14.0$  Hz, 1H), 2.65 (dd,  $J=9.0, 3.0$  Hz, 1H), 2.50 (dq,  $J=13.0, 3.0$  Hz, 1H), 2.36 (ddt,  $J=13.0, 10.5, 6.5$  Hz, 1H), 2.18-2.07

(m, 3H), 1.92 (dd,  $J = 15.0, 3.0$  Hz, 1H), 1.8801.74 (m, 3H), 1.63-1.58 (m, 1H), 1.50-1.1 (m, 2H), 1.31 (dt,  $J = 13.5, 3.0$  Hz, 1H), 1.16 (s, 3H), 1.13 (s, 3H), 1.10-0.97 (m, 8H), 0.92-0.83 (m, 3H), 0.80 (d,  $J = 7.0$  Hz, 3H), 0.67 (s, 3H);  $^{13}\text{C}$  NMR (125 MHz,  $\text{CDCl}_3$ )  $\delta$  212.1, 177.9, 172.5, 171.5, 139.4, 137.5, 62.5, 60.4, 58.9, 57.5, 51.4, 50.1, 48.5, 44.1, 40.4, 40.1, 39.9, 38.4, 37.6, 37.3, 34.6, 29.6, 28.7, 27.1, 22.8, 20.2, 20.0, 19.7, 19.2, 18.4, 14.2; HRMS (ESI):  $m/z$ : calculated for  $\text{C}_{31}\text{H}_{45}\text{NO}_6\text{Na}$ :  $[\text{M} + \text{Na}]^+$  550.3139, found 550.3150. LC-MS ( $t_{\text{R}} = 0.86$  min,  $\lambda = 254$  nm, purity 97%).

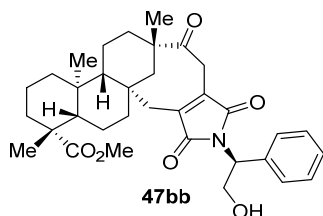

**47bb** White solid, 53.8 mg, yield 96%.  $^1\text{H}$  NMR (500 MHz,  $\text{CDCl}_3$ )  $\delta$  7.36-7.28 (m, 5H), 5.21 (dd,  $J = 9.0, 5.0$  Hz, 1H), 4.49 (dt,  $J = 12.0, 8.0$  Hz, 1H), 4.10 (dt,  $J = 12.0, 5.0$  Hz, 1H), 3.86 (dd,  $J = 18.5, 1.5$  Hz, 1H), 3.67 (s, 3H), 3.18 (dd,  $J = 18.5, 1.5$  Hz, 1H), 2.86 (d,  $J = 14.0$  Hz, 1H), 2.50 (dq,  $J = 13.5, 3.0$  Hz, 1H), 2.42 (dd,  $J = 8.0, 5.0$  Hz, 1H), 2.18-2.09 (m, 3H), 1.93 (dd,  $J = 14.5, 2.5$  Hz, 1H), 1.90-1.81 (m, 2H), 1.75 (d,  $J = 13.0$  Hz, 1H), 1.62-1.59 (m, 1H), 1.49-1.40 (m, 2H), 1.35 (dt,  $J = 13.5, 3.0$  Hz, 1H), 1.17 (s, 3H), 1.11 (s, 3H), 1.08 (d,  $J = 14.5$  Hz, 1H), 1.07 (dd,  $J = 12.5, 2.5$  Hz, 1H), 1.03-0.97 (m, 3H), 0.93-0.82 (m, 2H), 0.66 (s, 3H);  $^{13}\text{C}$  NMR (125 MHz,  $\text{CDCl}_3$ )  $\delta$  212.0, 177.9, 172.1, 171.0, 139.7, 138.0, 137.2, 129.0, 128.4, 127.7, 62.8, 59.0, 58.4, 57.5, 51.5, 50.0, 48.5, 44.1, 40.4, 40.1, 39.9, 38.4, 37.6, 37.3, 34.6, 29.4, 28.8, 22.9, 19.8, 19.2, 18.4, 14.2; HRMS (ESI):  $m/z$ : calculated for  $\text{C}_{34}\text{H}_{43}\text{NO}_6\text{Na}$ :  $[\text{M} + \text{Na}]^+$  584.2983, found 584.2989. LC-MS ( $t_{\text{R}} = 0.88$  min,  $\lambda = 254$  nm, purity >99%).

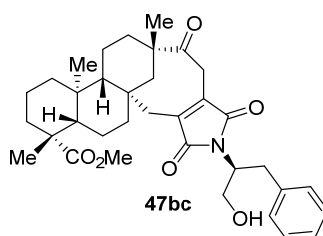

**47bc**, White solid, 56.9 mg, yield 99%.  $^1\text{H}$  NMR (500 MHz,  $\text{CDCl}_3$ )  $\delta$  7.28-7.25 (m, 2H), 7.22-7.19 (m, 1H), 7.17-7.16 (m, 2H), 4.43-4.38 (m, 1H), 3.99-3.93 (m, 1H), 3.85 (d,  $J = 12.0$  Hz, 1H), 3.73-3.69 (m, 4H), 3.14-3.06 (m, 3H), 2.79 (d,  $J = 14.5$  Hz, 1H), 2.58 (d,  $J = 5.5$  Hz, 1H), 2.48 (dq,  $J = 13.5, 3.0$  Hz, 1H), 2.19-2.09 (m, 2H), 2.04 (d,  $J = 14.0$  Hz, 1H), 1.90-1.73 (m, 4H), 1.60-1.57 (m, 1H), 1.46-1.37 (m, 2H), 1.34 (dt,  $J = 13.5, 3.0$  Hz, 1H), 1.19 (s, 3H), 1.08 (s, 3H), 1.06-0.95 (m, 5H), 0.92-0.82 (m, 2H), 0.66 (s, 3H);  $^{13}\text{C}$  NMR (125 MHz,  $\text{CDCl}_3$ )  $\delta$  212.0, 177.9, 172.3, 170.7, 139.4, 137.6, 137.5, 129.4, 128.7, 126.9, 63.2, 59.0, 57.5, 55.6, 51.5, 49.9, 48.4, 44.1, 40.4, 40.0, 39.9, 38.4, 37.6, 37.2, 34.9, 34.7, 29.4, 28.8, 22.7, 19.8, 19.2, 18.4, 14.2; HRMS (ESI):  $m/z$ : calculated for  $\text{C}_{35}\text{H}_{46}\text{NO}_6$ :  $[\text{M} + \text{H}]^+$  576.3320, found 576.3329. LC-MS ( $t_{\text{R}} = 0.94$  min,  $\lambda = 254$  nm, purity 98%).



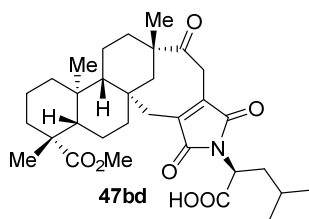

**47bd**, Light brown solid, 45.1 mg, yield 86%.  $^1\text{H NMR}$  (500 MHz,  $\text{CDCl}_3$ )  $\delta$  11.02 (brs, 1H), 4.77 (dd,  $J = 11.5, 4.5$  Hz, 1H), 3.89 (dd,  $J = 13.5, 1.5$  Hz, 1H), 3.68 (s, 3H), 3.18 (dd,  $J = 13.5, 1.5$  Hz, 1H), 2.86 (d,  $J = 14.5$  Hz, 1H), 2.50 (dq,  $J = 13.5, 3.0$  Hz, 1H), 2.25 (ddd,  $J = 14.5, 11.5, 4.5$  Hz, 1H), 2.18-2.07 (m, 3H), 1.94 (dd,  $J = 14.5, 2.5$  Hz, 1H), 1.90-1.74 (m, 4H), 1.62-1.60 (m, 1H), 1.49-1.41 (m, 3H), 1.32 (dt,  $J = 13.5, 3.0$  Hz, 1H), 1.16 (s, 3H), 1.13 (s, 3H), 1.11-0.82 (m, 13H), 0.67 (s, 3H);  $^{13}\text{C NMR}$  (125 MHz,  $\text{CDCl}_3$ )  $\delta$  212.1, 178.0, 175.6, 170.9, 169.9, 139.9, 138.1, 59.0, 57.5, 51.5, 50.9, 50.0, 48.5, 44.1, 40.4, 40.1, 39.9, 38.4, 37.6, 37.3, 37.1, 34.6, 29.4, 28.7, 25.3, 23.2, 22.9, 21.2, 19.7, 19.2, 18.4, 14.2; **HRMS** (ESI):  $m/z$ : calculated for  $\text{C}_{32}\text{H}_{45}\text{NO}_7\text{Na}$ :  $[\text{M} + \text{Na}]^+$  578.3088, found 578.3098.

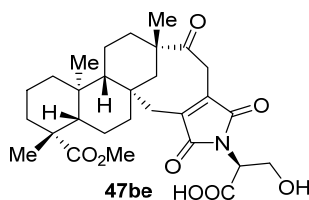

**47be**, White solid, 41.2 mg, yield 78%.  $^1\text{H NMR}$  (500 MHz,  $\text{CDCl}_3$ )  $\delta$  6.62 (brs, 2H), 4.86 (dd,  $J = 5.5, 3.5$  Hz, 1H), 4.25 (dd,  $J = 12.5, 5.5$  Hz, 1H), 4.11 (dd,  $J = 12.5, 3.5$  Hz, 1H), 3.90 (d,  $J = 18.5$  Hz, 1H), 3.66 (s, 3H), 3.20 (d,  $J = 18.0$  Hz, 1H), 2.87 (d,  $J = 14.0$  Hz, 1H), 2.50 (dq,  $J = 13.5, 3.5$  Hz, 1H), 2.17-2.04 (m, 3H), 1.96 (dd,  $J = 14.5, 2.5$  Hz, 1H), 1.89-1.73 (m, 3H), 1.61 (d,  $J = 9.5$  Hz, 1H), 1.48-1.40 (m, 2H), 1.33 (dt,  $J = 13.0, 3.0$  Hz, 1H), 1.16 (s, 3H), 1.13 (s, 3H), 1.11-0.96 (m, 5H), 0.93-0.82 (m, 2H), 0.66 (s, 3H);  $^{13}\text{C NMR}$  (125 MHz,  $\text{CDCl}_3$ )  $\delta$  211.9, 178.1, 171.5, 171.1, 170.4, 140.4, 138.6, 61.1, 58.9, 57.5, 55.3, 51.6, 49.9, 48.5, 44.1, 40.4, 40.2, 39.9, 38.3, 37.6, 37.2, 34.6, 29.4, 28.8, 23.0, 19.7, 19.2, 18.4, 14.2; **HRMS** (ESI):  $m/z$ : calculated for  $\text{C}_{29}\text{H}_{39}\text{NO}_8\text{Na}$ :  $[\text{M} + \text{Na}]^+$  552.2568, found 552.2576. LC-MS ( $t_R = 3.1$  min,  $\lambda = 254$  nm, purity 99%).

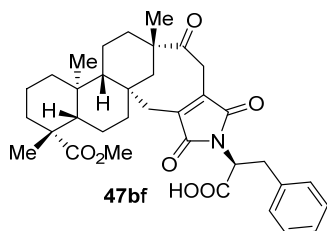

**47bf**, White solid, 47.1 mg, yield 80%.  $^1\text{H NMR}$  (500 MHz,  $\text{CDCl}_3$ )  $\delta$  7.28-7.25 (m, 2H), 7.23-7.20 (m, 1H), 7.14-7.13 (m, 2H), 5.00 (t,  $J = 8.5$  Hz, 1H), 3.72 (dd,  $J = 18.5, 1.5$  Hz, 1H), 3.68 (s, 3H), 3.50 (d,  $J = 8.5$  Hz, 2H), 3.08 (dd,  $J = 18.5, 1.5$  Hz, 1H), 2.77 (d,  $J = 14.5$  Hz, 1H), 2.47 (dq,  $J = 13.0, 3.0$  Hz, 1H), 2.18-2.01 (m, 3H), 1.89-1.81 (m, 2H), 1.74 (dd,  $J = 14.5, 2.5$  Hz, 1H), 1.58 (d,  $J = 14.5$  Hz, 1H), 1.47-1.36 (m, 2H), 1.31 (dt,  $J = 13.5, 3.0$  Hz, 1H), 1.18 (s, 3H), 1.07 (s, 3H), 1.10-0.94 (m, 6H), 0.91-0.81 (m, 2H), 0.64 (s, 3H);  $^{13}\text{C NMR}$  (125 MHz,  $\text{CDCl}_3$ )  $\delta$  212.0, 178.0, 174.3,

170.7, 169.5, 139.7, 137.8, 136.7, 129.1, 128.9, 127.3, 59.0, 57.5, 53.5, 51.5, 49.8, 48.4, 44.1, 40.4, 40.0, 39.8, 38.4, 37.6, 37.1, 34.7, 34.5, 29.4, 28.8, 22.8, 19.7, 19.2, 18.4, 14.2; **HRMS** (ESI):  $m/z$ : calculated for  $C_{35}H_{43}NO_7Na$ :  $[M + Na]^+$  612.2932, found 612.2939. LC-MS ( $t_R$  = 3.04 min,  $\lambda$  = 254 nm, purity 98%).

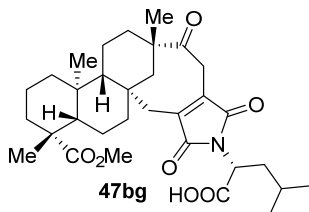

**47bg**, White solid, 47.0 mg, yield 85%. **<sup>1</sup>H NMR** (500 MHz,  $CDCl_3$ )  $\delta$  9.13 (brs, 1H), 4.76 (dd,  $J$  = 11.5, 4.5 Hz, 1H), 3.89 (dd,  $J$  = 18.5, 1.5 Hz, 1H), 3.67 (s, 3H), 3.19 (dd,  $J$  = 18.5, 1.5 Hz, 1H), 2.85 (d,  $J$  = 14.0 Hz, 1H), 2.50 (dq,  $J$  = 13.5, 3.0 Hz, 1H), 2.28 (ddd,  $J$  = 14.5, 12.0, 4.0 Hz, 1H), 2.19-2.07 (m, 3H), 1.94 (dd,  $J$  = 14.5, 2.5 Hz, 1H), 1.89-1.80 (m, 2H), 1.75 (d,  $J$  = 12.5 Hz, 1H), 1.62-1.59 (m, 1H), 1.49-1.41 (m, 3H), 1.34 (dt,  $J$  = 13.5, 3.0 Hz, 1H), 1.17 (s, 3H), 1.13 (s, 3H), 1.09 (d,  $J$  = 14.5 Hz, 1H), 1.07 (dd,  $J$  = 12.5, 2.5 Hz, 1H), 1.04-0.96 (m, 3H), 0.93 (d,  $J$  = 6.5 Hz, 3H), 0.91 (d,  $J$  = 6.5 Hz, 3H), 0.91-0.82 (m, 2H), .067 (s, 3H); **<sup>13</sup>C NMR** (125 MHz,  $CDCl_3$ )  $\delta$  212.2, 178.0, 175.6, 171.0, 169.9, 140.0, 137.9, 59.0, 57.5, 51.5, 50.9, 50.0, 48.5, 44.1, 40.5, 40.1, 39.8, 38.5, 37.6, 37.3, 37.1, 34.7, 29.5, 28.7, 25.3, 23.3, 22.9, 21.1, 19.8, 19.2, 18.4, 14.2; **HRMS** (ESI):  $m/z$ : calculated for  $C_{32}H_{45}NO_7Na$ :  $[M + Na]^+$  578.3088, found 578.3098. LC-MS ( $t_R$  = 3.12 min,  $\lambda$  = 254 nm, purity >99%).

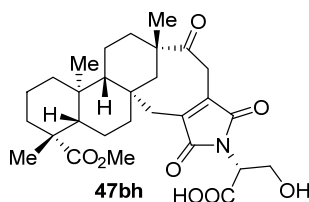

**47bh**, White solid, 37.0 mg, yield 70%. **<sup>1</sup>H NMR** (500 MHz,  $CDCl_3$ )  $\delta$  6.48 (brs, 2H), 4.87 (dd,  $J$  = 6.0, 3.5 Hz, 1H), 4.24 (dd,  $J$  = 12.5, 5.5 Hz, 1H), 4.12 (dd,  $J$  = 12.5, 3.5 Hz, 1H), 3.90 (d,  $J$  = 18.5 Hz, 1H), 3.67 (s, 3H), 3.20 (d,  $J$  = 18.5 Hz, 1H), 2.87 (d,  $J$  = 14.0 Hz, 1H), 2.50 (d,  $J$  = 11.5 Hz, 1H), 2.18-2.04 (m, 3H), 1.96 (d,  $J$  = 14.5 Hz, 1H), 1.87-1.74 (m, 3H), 1.61 (d,  $J$  = 14.0 Hz, 1H), 1.48-1.41 (m, 2H), 1.36 (dt,  $J$  = 13.5, 3.5 Hz, 1H), 1.17 (s, 3H), 1.13 (s, 3H), 1.11-0.97 (m, 5H), 0.93-0.83 (m, 2H), 0.66 (s, 3H); **<sup>13</sup>C NMR** (125 MHz,  $CDCl_3$ )  $\delta$  212.0, 178.1, 171.5, 171.2, 170.3, 140.4, 138.4, 61.2, 58.9, 57.5, 55.1, 51.6, 49.9, 48.5, 44.1, 40.4, 40.2, 39.8, 38.3, 37.6, 37.2, 34.6, 29.4, 28.8, 23.0, 19.7, 19.2, 18.4, 14.2; **HRMS** (ESI):  $m/z$ : calculated for  $C_{29}H_{39}NO_8Na$ :  $[M + Na]^+$  552.2568, found 552.2578. LC-MS ( $t_R$  = 3.26 min,  $\lambda$  = 254 nm, purity 99%).

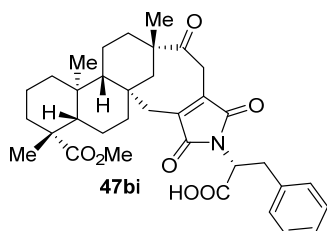

**47bi**, White solid, 51.8 mg, yield 88%. <sup>1</sup>H NMR (500 MHz, CDCl<sub>3</sub>) δ 10.49 (brs, 1H), 7.27-7.24 (m, 2H), 7.21-7.18 (m, 1H), 7.15-7.13 (m, 2H), 5.02 (dd, *J* = 11.0, 6.0 Hz, 1H), 3.80 (d, *J* = 18.5 Hz, 1H), 3.67 (s, 3H), 3.53-3.45 (m, 2H), 3.08 (d, *J* = 18.5 Hz, 1H), 2.72 (d, *J* = 14.5 Hz, 1H), 2.47 (dq, *J* = 13.5, 2.5 Hz, 1H), 2.16 (d, *J* = 13.0 Hz, 1H), 2.05-1.97 (m, 2H), 1.84 (qt, *J* = 13.5, 3.5 Hz, 1H), 1.72-1.69 (m, 3H), 1.57 (d, *J* = 15.0 Hz, 1H), 1.45-1.35 (m, 2H), 1.17 (s, 3H), 1.09 (s, 3H), 1.04-0.92 (m, 6H), 0.83 (td, *J* = 13.5, 4.0 Hz, 1H), 0.72 (t, *J* = 13.0 Hz, 1H), 0.63 (s, 3H); <sup>13</sup>C NMR (125 MHz, CDCl<sub>3</sub>) δ 212.0, 178.0, 174.1, 170.5, 169.6, 139.7, 137.7, 136.6, 129.0, 128.9, 127.3, 58.9, 57.5, 53.4, 51.5, 49.8, 48.5, 44.1, 40.4, 39.9, 39.5, 38.4, 37.6, 37.1, 34.7, 3.6, 29.5, 28.7, 22.8, 19.7, 19.2, 18.4, 14.2; HRMS (ESI): *m/z*: calculated for C<sub>35</sub>H<sub>44</sub>NO<sub>7</sub>: [M + H]<sup>+</sup> 590.3112, found 590.3124. LC-MS (*t*<sub>R</sub> = 0.89 min, λ = 254 nm, purity 96%).

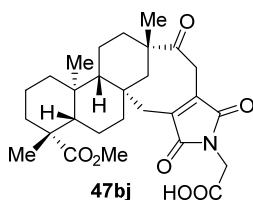

**47bj**, White solid, 41.9 mg, yield 84%. <sup>1</sup>H NMR (500 MHz, CDCl<sub>3</sub>) δ 10.40 (brs, 1H), 4.31 (s, 2H), 3.90 (dd, *J* = 18.5, 1.5 Hz, 1H), 3.67 (s, 3H), 3.22 (dd, *J* = 18.5, 1.5 Hz, 1H), 2.88 (d, *J* = 14.0 Hz, 1H), 2.51 (dq, *J* = 13.5, 3.0 Hz, 1H), 2.18-2.06 (m, 3H), 1.94 (dd, *J* = 14.5, 2.5 Hz, 1H), 1.90-1.74 (m, 3H), 1.62-1.59 (m, 1H), 1.49-1.41 (m, 2H), 1.34 (dt, *J* = 13.5, 3.5 Hz, 1H), 1.16 (s, 3H), 1.13 (s, 3H), 1.11-1.05 (m, 2H), 1.04-0.96 (m, 3H), 0.93-0.82 (m, 2H), 0.67 (s, 3H); <sup>13</sup>C NMR (125 MHz, CDCl<sub>3</sub>) δ 212.0, 178.1, 172.5, 170.7, 169.6, 140.3, 138.4, 58.9, 57.5, 51.5, 49.9, 48.5, 44.1, 40.4, 40.1, 39.8, 39.0, 38.4, 37.6, 37.2, 34.6, 29.5, 28.7, 22.9, 19.7, 19.2, 18.4, 14.2; HRMS (ESI): *m/z*: calculated for C<sub>28</sub>H<sub>37</sub>NO<sub>7</sub>Na: [M + Na]<sup>+</sup> 522.2462, found 522.2474. LC-MS (*t*<sub>R</sub> = 0.48 min, λ = 254 nm, purity >99%).

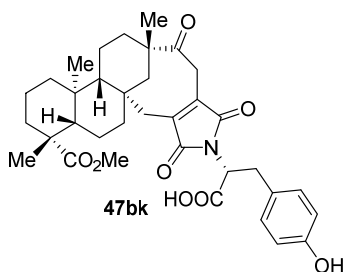

**47bk**, Pale yellow solid, 38.5 mg, yield 64%. <sup>1</sup>H NMR (500 MHz, CDCl<sub>3</sub>) δ 6.69 (d, *J* = 8.5 Hz, 2H), 6.71 (d, *J* = 9.0 Hz, 2H), 4.96 (dd, *J* = 11.5, 5.5 Hz, 1H), 3.80 (d, *J* = 18.5 Hz, 1H), 3.67 (s, 3H), 3.43 (dd, *J* = 14.5, 5.5 Hz, 1H), 3.38 (dd, *J* = 14.5, 11.5 Hz, 1H), 3.08 (d, *J* = 18.5 Hz, 1H), 2.72 (d, *J* = 14.5 Hz, 1H), 2.47 (d, *J* = 13.5 Hz, 1H), 2.15 (d, *J* = 13.5 Hz, 1H), 2.06-1.98 (m, 2H), 1.83 (q, *J* = 13.5 Hz, 1H), 1.74-1.71 (m, 3H), 1.57 (d, *J* = 13.5 Hz, 1H), 1.45-1.35 (m, 2H), 1.16 (s, 3H), 1.09 (s, 3H), 1.05-0.93 (m, 7H), 0.85-0.74 (m, 2H), 0.63 (s, 3H); <sup>13</sup>C NMR (125 MHz, CDCl<sub>3</sub>) δ 212.3, 178.3, 173.8, 170.6, 169.8, 154.9, 139.7, 137.7, 130.3, 128.6, 115.8, 58.9, 57.5, 53.7, 51.6, 49.7, 48.5, 44.1, 40.4, 39.9, 39.3, 38.4, 37.6, 37.1, 34.7, 33.8, 29.5, 28.8, 22.8, 19.7, 19.2, 18.4, 14.2; HRMS (ESI): *m/z*: calculated for C<sub>35</sub>H<sub>43</sub>NO<sub>8</sub>Na: [M + Na]<sup>+</sup> 628.2881, found 628.2893. LC-MS (*t*<sub>R</sub> = 2.42 min, λ = 210 nm, purity 95%).

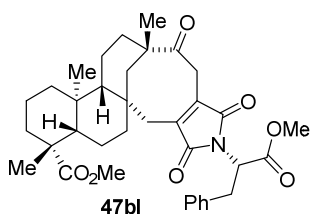

**47bl**, Yellow oil, yield: (53.6 mg, 89%)  $^1\text{H NMR}$  (500 MHz,  $\text{CDCl}_3$ )  $\delta$  7.27 – 7.09 (m, 3H), 7.10 – 7.00 (m, 2H), 4.85 (dd,  $J = 10.5, 6.3$  Hz, 1H), 3.71 (s, 3H), 3.68 – 3.57 (m, 4H), 3.45 – 3.35 (m, 2H), 3.00 (d,  $J = 18.4$  Hz, 1H), 2.71 (d,  $J = 14.2$  Hz, 1H), 2.40 (dq,  $J = 13.4, 3.1$  Hz, 1H), 2.18 – 1.90 (m, 3H), 1.90 – 1.59 (m, 4H), 1.60 – 1.46 (m, 1H), 1.44 – 1.30 (m, 2H), 1.25 (dt,  $J = 13.4, 3.3$  Hz, 1H), 1.11 (s, 3H), 1.06 – 0.86 (m, 8H), 0.79 (tdd,  $J = 17.8, 12.9, 3.7$  Hz, 2H), 0.57 (s, 3H).  $^{13}\text{C NMR}$  (126 MHz,  $\text{CDCl}_3$ )  $\delta$  211.7, 177.6, 170.6, 169.4, 169.3, 139.4, 137.5, 136.7, 128.9, 128.6, 126.9, 58.8, 57.3, 53.6, 52.9, 51.2, 49.6, 48.2, 43.8, 40.2, 39.7, 39.6, 38.2, 37.4, 36.9, 34.4, 34.4, 29.2, 28.5, 22.5, 19.5, 19.0, 18.2, 14.0. **HRMS** (ESI)  $m/z$ : anal. calculated for  $[\text{C}_{36}\text{H}_{45}\text{NO}_7 + \text{NH}_4]^+$ : 621.3534, found: 621.3529. LC-MS ( $t_R = 3.80$  min,  $\lambda = 254$  nm, >99%).

### Ring-cleavage of **5b** and **5c**.

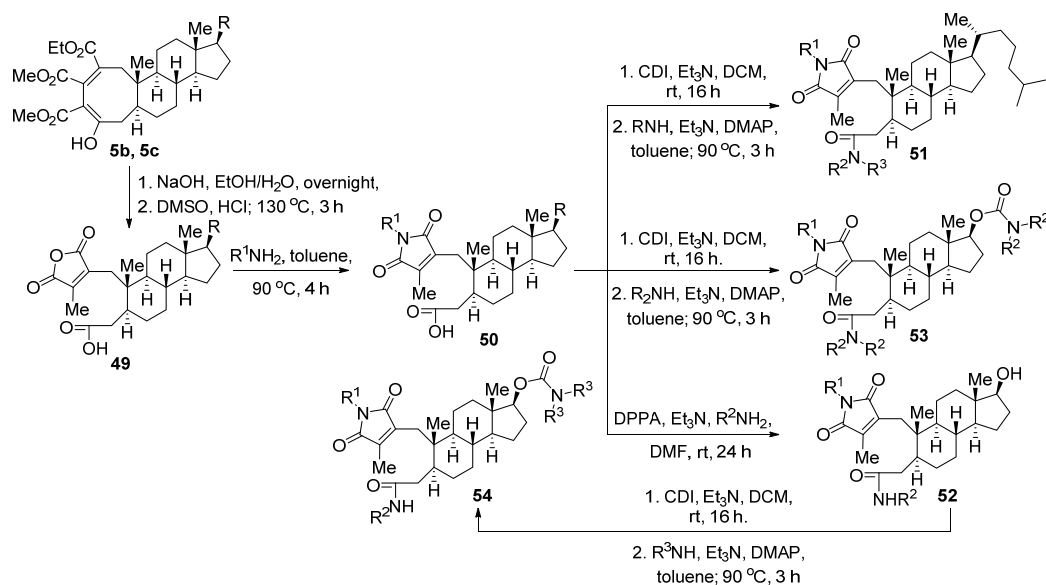

### Supplementary Figure 16. Ring-cleavage of **5b** and **5c**.

General procedure H was used for preparation of **50**. General procedure F was used for formation of carbamates **51**, **52** and **54**.

To a solution of **5b** or **5c** (1.44 g, 2.33 mol) in EtOH (20 mL) and  $\text{H}_2\text{O}$  (5 mL) was added NaOH (928 mg, 23.3 mmol). The reaction mixture was heated at 100 °C overnight. The mixture was cooled to room temperature, acidification of the mixture with 2N HCl, diluted with EtOAc (150 mL), and washed with brine (50 mL  $\times$  2). The organic phase was dried over sodium sulfate and concentrated in vacuum to afford crude product which was directly used in the next step without further purification. To a solution of the above product in DMSO (10 mL) was added HCl (3 mL,

2.0 N). The reaction mixture was heated at 130 °C for 2 h. The mixture was cooled to room temperature then diluted with ethyl acetate (150 mL), and washed with brine (50 mL × 3). The organic phase was dried over sodium sulfate and concentrated in vacuum. Flash column chromatography over silica column afforded **49**.

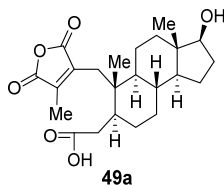

**49a**, yield: (189 mg, 47%).  $^1\text{H NMR}$  (500 MHz,  $\text{DMSO-}d_6$ )  $\delta$  12.03 (s, 1H), 4.59 – 4.34 (m, 1H), 3.60 – 3.46 (m, 1H), 2.79 (dd,  $J = 16.7, 1.5$  Hz, 1H), 2.61 (d,  $J = 14.4$  Hz, 1H), 2.53 (d,  $J = 14.3$  Hz, 1H), 2.08 (s, 3H), 2.00 – 1.82 (m, 3H), 1.79 (dt,  $J = 12.5, 3.4$  Hz, 1H), 1.66 – 1.43 (m, 4H), 1.43 – 1.30 (m, 2H), 1.29 – 0.97 (m, 4H), 0.98 – 0.88 (m, 2H), 0.88 (s, 3H), 0.85 – 0.72 (m, 1H), 0.70 (s, 3H).  $^{13}\text{C NMR}$  (126 MHz,  $\text{DMSO}$ )  $\delta$  174.8, 167.0, 166.8, 144.5, 141.8, 80.5, 51.3, 48.8, 42.9, 42.6, 37.2, 36.7, 36.6, 31.7, 30.4, 30.1, 28.6, 23.50, 22.6, 16.4, 12.1, 10.8. **HRMS** (ESI)  $m/z$ : anal. calculated for  $[\text{C}_{23}\text{H}_{32}\text{O}_6 + \text{H}]^+$ : 405.2272, found: 405.2260.

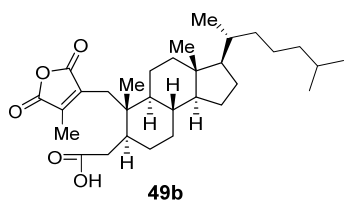

**49b**, yield: (398 mg, 44%).  $^1\text{H NMR}$  (500 MHz,  $\text{CDCl}_3$ )  $\delta$  2.88 (dd,  $J = 16.5, 1.7$  Hz, 1H), 2.63 (d,  $J = 14.1$  Hz, 1H), 2.47 (d,  $J = 14.1$  Hz, 1H), 2.13 (s, 3H), 2.09 – 1.97 (m, 2H), 1.89 – 1.75 (m, 2H), 1.71 (dq,  $J = 13.4, 3.6$  Hz, 1H), 1.65 – 1.42 (m, 5H), 1.42 – 0.93 (m, 16H), 0.91 (t,  $J = 3.3$  Hz, 5H), 0.88 (d,  $J = 2.4$  Hz, 3H), 0.86 (d,  $J = 2.4$  Hz, 3H), 0.85 – 0.76 (m, 2H), 0.69 (s, 3H).  $^{13}\text{C NMR}$  (126 MHz,  $\text{CDCl}_3$ )  $\delta$  179.1, 166.4, 166.1, 143.4, 142.3, 56.8, 56.1, 49.2, 42.76, 42.4, 40.0, 40.0, 39.5, 36.5, 36.4, 36.1, 35.8, 32.0, 30.4, 28.5, 28.2, 28.0, 24.0, 23.7, 23.0, 22.8, 22.5, 18.6, 16.1, 12.3, 10.8. **HRMS** (ESI)  $m/z$ : anal. calculated for  $[\text{C}_{31}\text{H}_{48}\text{O}_5 + \text{Na}]^+$ : 523.3394, found: 523.3384.

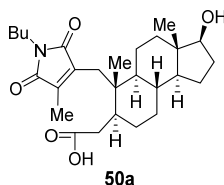

**50a**, yield: (40.9 mg, 89%).  $^1\text{H NMR}$  (500 MHz,  $\text{CDCl}_3$ )  $\delta$  3.65 (t,  $J = 8.5$  Hz, 1H), 3.46 (t,  $J = 7.3$  Hz, 2H), 3.03 (dd,  $J = 16.2, 1.8$  Hz, 1H), 2.51 (d,  $J = 14.3$  Hz, 1H), 2.44 (d,  $J = 14.3$  Hz, 1H), 2.11 – 1.93 (m, 4H), 1.88 (ddt,  $J = 15.6, 12.3, 3.3$  Hz, 2H), 1.67 (dq,  $J = 13.4, 3.5$  Hz, 1H), 1.61 – 1.37 (m, 6H), 1.37 – 1.18 (m, 4H), 1.18 – 1.02 (m, 2H), 0.98 – 0.87 (m, 7H), 0.87 – 0.80 (m, 1H), 0.78 (s, 3H), 0.75 (dd,  $J = 12.8, 4.1$  Hz, 1H).  $^{13}\text{C NMR}$  (126 MHz,  $\text{CDCl}_3$ )  $\delta$  178.5, 172.6, 172.0, 139.8, 138.4, 81.8, 51.4, 49.2, 42.9, 42.4, 40.1, 37.9, 36.9, 36.8, 36.4, 31.2, 30.6, 30.0, 28.4, 23.3, 22.6, 19.9, 16.1, 13.6, 11.4, 10.0. **HRMS** (ESI)  $m/z$ : anal. calculated for  $[\text{C}_{27}\text{H}_{41}\text{NO}_5 + \text{Na}]^+$ : 482.2877,

found: 482.2882. LC-MS ( $t_R$  = 2.27 min,  $\lambda$  = 254 nm, purity 98%).

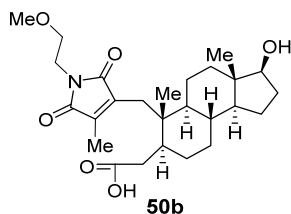

**50b**, yield: (34.1 mg, 74%).  $^1\text{H NMR}$  (400 MHz,  $\text{CDCl}_3$ )  $\delta$  3.70 – 3.59 (m, 2H), 3.50 (t,  $J$  = 5.7 Hz, 2H), 3.32 (s, 3H), 3.03 (dd,  $J$  = 16.3, 1.3 Hz, 1H), 2.52 (d,  $J$  = 14.3 Hz, 1H), 2.45 (d,  $J$  = 14.2 Hz, 1H), 2.13 – 1.95 (m, 5H), 1.95 – 1.80 (m, 2H), 1.76 – 1.62 (m, 1H), 1.63 – 1.33 (m, 5H), 1.34 – 1.00 (m, 4H), 1.01 – 0.82 (m, 5H), 0.77 (s, 3H).  $^{13}\text{C NMR}$  (101 MHz,  $\text{CDCl}_3$ )  $\delta$  178.5, 172.5, 171.8, 140.1, 138.6, 81.8, 69.4, 58.5, 51.4, 49.1, 42.8, 42.4, 40.0, 37.4, 36.9, 36.7, 36.4, 31.2, 30.5, 30.0, 28.5, 23.3, 22.5, 16.1, 11.4, 10.1. **HRMS** (ESI)  $m/z$ : anal. calculated for  $[\text{C}_{26}\text{H}_{39}\text{NO}_6 + \text{Na}]^+$ : 484.2670, found: 484.2668. LC-MS ( $t_R$  = 1.66 min,  $\lambda$  = 254 nm, purity 98%).

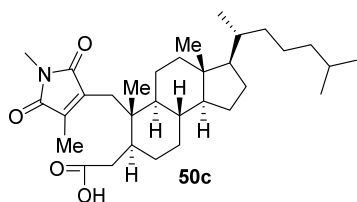

**50c**, White solid, 24.8 mg, yield 48%.  $^1\text{H NMR}$  (500 MHz,  $\text{CDCl}_3$ )  $\delta$  10.85 (brs, 1H), 3.03 (dd,  $J$  = 16.0, 1.0 Hz, 1H), 2.97 (s, 3H), 2.50 (d,  $J$  = 14.5, 1H), 2.43 (d,  $J$  = 14.5, 1H), 2.04-1.96 (m, 2H), 2.02 (s, 3H), 1.85-1.76 (m, 2H), 1.65 (dq,  $J$  = 13.5, 3.5 Hz, 1H), 1.58-1.41 (m, 5H), 1.38-0.94 (m, 16H), 0.90 (d,  $J$  = 6.5 Hz, 1H), 0.86 (s, 3H), 0.86 (d,  $J$  = 6.5 Hz, 3H), 0.85 (d,  $J$  = 7.5 Hz, 3H), 0.83-0.73 (m, 2H), 0.68 (s, 3H);  $^{13}\text{C NMR}$  (125 MHz,  $\text{CDCl}_3$ )  $\delta$  179.2, 172.9, 172.4, 140.3, 139.0, 57.1, 56.4, 49.1, 42.6 (2 carbons), 40.4, 40.1, 39.7, 37.0, 36.6, 36.3, 36.0, 31.4, 30.7, 28.9, 28.5, 28.2, 24.3, 24.2, 24.0, 23.1, 23.0, 22.8, 18.8, 16.4, 12.5, 10.3; **HRMS** (ESI):  $m/z$ : calculated for  $\text{C}_{32}\text{H}_{51}\text{NO}_4\text{Na}$ :  $[\text{M} + \text{Na}]^+$  536.3710, found 536.3705. LC-MS ( $t_R$  = 3.86 min,  $\lambda$  = 254 nm, purity 99%).

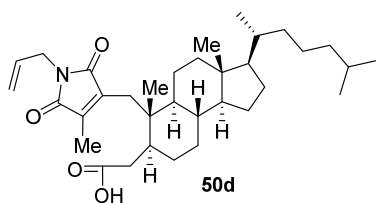

**50d**, Pale yellow solid, 36.1 mg, yield 67%.  $^1\text{H NMR}$  (500 MHz,  $\text{CDCl}_3$ )  $\delta$  11.18 (brs, 1H), 5.77 (ddt,  $J$  = 17.0, 10.5, 4.5 Hz, 1H), 5.17-5.11 (m, 2H), 4.07 (dt,  $J$  = 5.5, 1.5 Hz, 2H), 3.04 (d,  $J$  = 15.5 Hz, 1H), 2.51 (d,  $J$  = 14.0 Hz, 1H), 2.44 (d,  $J$  = 14.0 Hz, 1H), 2.03 (s, 3H), 2.02-1.96 (m, 2H), 1.85-1.77 (m, 2H), 1.65 (dq,  $J$  = 13.0, 3.0 Hz, 1H), 1.56-0.94 (m, 19H), 0.90 (d,  $J$  = 6.5 Hz, 3H), 0.87 (s, 3H), 0.86 (d,  $J$  = 6.5 Hz, 3H), 0.85 (d,  $J$  = 7.0 Hz, 3H), 0.83-0.72 (m, 2H), 0.68 (s, 3H);  $^{13}\text{C NMR}$  (125 MHz,  $\text{CDCl}_3$ )  $\delta$  179.2, 172.4, 171.7, 140.2, 139.0, 132.0, 117.5, 57.1, 56.4, 49.2, 42.7, 42.6, 40.4, 40.2, 39.7, 36.9, 36.6, 36.3, 36.0, 31.3, 30.7, 28.9, 28.5, 28.2, 24.3, 24.0, 23.2, 23.0, 22.8, 18.8,

16.4, 12.6, 10.4; **HRMS** (ESI):  $m/z$ : calculated for  $C_{34}H_{53}NO_4Na$ :  $[M + Na]^+$  562.3867, found 562.3855. LC-MS ( $t_R$  = 3.89 min,  $\lambda$  = 254 nm, purity 99%).

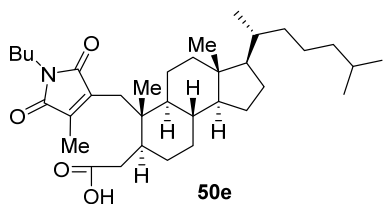

**50e**, Pale yellow solid, 39.4 mg, yield 71%.  **$^1H$  NMR** (500 MHz,  $CDCl_3$ )  $\delta$  3.46 (t,  $J$  = 7.5 Hz, 2H), 3.06 (dd,  $J$  = 16.0, 1.5 Hz, 1H), 2.49 (d,  $J$  = 14.0 Hz, 1H), 2.42 (d,  $J$  = 14.5 Hz, 1H), 2.03-1.97 (m, 2H), 2.02 (s, 3H), 1.85-1.77 (m, 2H), 1.65 (dq,  $J$  = 13.5, 3.0 Hz, 1H), 1.55-0.96 (m, 24H), 0.90 (d,  $J$  = 6.5 Hz, 3H), 0.90 (t,  $J$  = 7.0 Hz, 3H), 0.86 (s, 3H), 0.86 (d,  $J$  = 6.5 Hz, 3H), 0.85 (d,  $J$  = 6.0 Hz, 3H), 0.82-0.73 (m, 2H), 0.68 (s, 3H);  **$^{13}C$  NMR** (125 MHz,  $CDCl_3$ )  $\delta$  179.0, 173.0, 172.2, 140.0, 138.8, 57.1, 56.5, 49.1, 42.6 (2 carbons), 40.4, 40.2, 39.7, 38.2, 37.0, 36.7, 36.3, 36.0, 31.3, 30.8, 30.7, 28.8, 28.5, 28.2, 24.3, 24.0, 23.2, 23.0, 22.8, 20.2, 18.8, 16.3, 13.9, 12.6, 10.3; **HRMS** (ESI):  $m/z$ : calculated for  $C_{35}H_{57}NO_4Na$ :  $[M + Na]^+$  578.4180, found 578.4167.

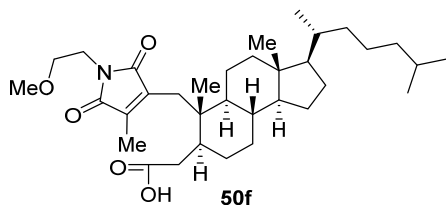

**50f**, Pale yellow solid, 42.9 mg, yield 77%.  **$^1H$  NMR** (500 MHz,  $CDCl_3$ )  $\delta$  3.72-3.64 (m, 2H), 3.50 (t,  $J$  = 6.0 Hz, 2H), 3.31 (s, 3H), 3.05 (d,  $J$  = 11.0 Hz, 1H), 2.50 (d,  $J$  = 14.0 Hz, 1H), 2.43 (d,  $J$  = 14.0 Hz, 1H), 2.03 (s, 3H), 2.01-1.96 (m, 2H), 1.85-1.76 (m, 2H), 1.64 (dq,  $J$  = 13.5, 3.5 Hz, 1H), 1.55-0.94 (m, 19H), 0.90 (d,  $J$  = 6.5 Hz, 3H), 0.86 (s, 3H), 0.86 (d,  $J$  = 6.5 Hz, 3H), 0.85 (d,  $J$  = 6.5 Hz, 3H), 0.84-0.71 (m, 2H), 0.68 (s, 3H);  **$^{13}C$  NMR** (125 MHz,  $CDCl_3$ )  $\delta$  179.0, 172.8, 172.0, 140.3, 138.9, 69.7, 58.8, 57.1, 56.5, 49.1, 42.6 (2 carbons), 0.4, 40.2, 39.7, 37.6, 37.0, 36.6, 36.3, 36.0, 31.4, 30.7, 28.7, 28.5, 28.2, 24.3, 24.0, 23.2, 23.0, 22.8, 18.8, 16.3, 12.6, 10.4; **HRMS** (ESI):  $m/z$ : calculated for  $C_{34}H_{55}NO_5Na$ :  $[M + Na]^+$  580.3972, found 580.3970. LC-MS ( $t_R$  = 3.83 min,  $\lambda$  = 254 nm, purity >99%).

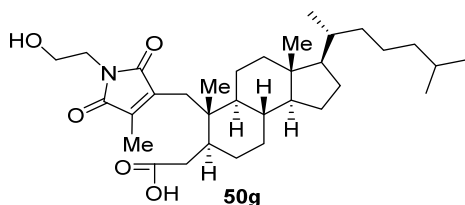

**50g**, Pale yellow solid, 35.8 mg, yield 66%.  **$^1H$  NMR** (500 MHz,  $CDCl_3$ )  $\delta$  6.65 (brs, 1H), 3.76-3.69 (m, 3H), 3.62-3.58 (m, 2H), 3.03 (d,  $J$  = 17.0 Hz, 1H), 2.51 (d,  $J$  = 14.5 Hz, 1H), 2.46 (d,  $J$  = 14.0 Hz, 1H), 2.06-2.03 (m, 1H), 2.04 (s, 3H), 1.93 (dd,  $J$  = 17.0, 10.5 Hz, 1H), 1.86-1.76 (m, 2H), 1.60-1.44 (m, 6H), 1.39-0.96 (m, 15H), 0.90 (d,  $J$  = 6.5 Hz, 3H), 0.87-0.85 (m, 9H), 0.83-0.75 (m,

2H), 0.69 (s, 3H);  $^{13}\text{C NMR}$  (125 MHz,  $\text{CDCl}_3$ )  $\delta$  178.9, 173.4, 172.3, 139.9, 139.3, 60.7, 57.2, 56.5, 48.8, 43.0, 42.6, 41.1, 40.5, 39.7, 36.8, 36.5, 36.3, 36.0, 30.8, 30.6, 29.4, 28.5, 28.2, 24.3, 24.0, 23.0 (2 carbons), 22.8, 18.8, 16.6, 12.5, 10.6; **HRMS** (ESI):  $m/z$ : calculated for  $\text{C}_{33}\text{H}_{53}\text{NO}_5\text{Na}$ :  $[\text{M} + \text{Na}]^+$  566.3816, found 566.3827. LC-MS ( $t_{\text{R}} = 3.73$  min,  $\lambda = 254$  nm, purity 99%).

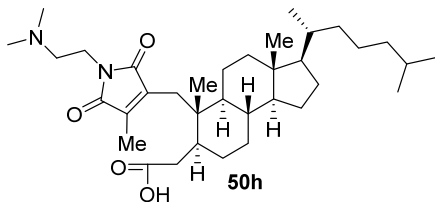

**50h**, Pale yellow solid, 18.2 mg, yield 32%.  $^1\text{H NMR}$  (500 MHz,  $\text{CDCl}_3$ )  $\delta$  11.35 (brs, 1H), 3.76-3.71 (m, 2H), 3.15 (dt,  $J = 13.0, 6.5$  Hz, 1H), 2.91 (dt,  $J = 13.5, 5.5$  Hz, 1H), 2.78 (d,  $J = 16.5$  Hz, 1H), 2.68 (s, 6H), 2.51 (s, 2H), 2.06-2.03 (m, 1H), 2.04 (s, 3H), 1.85-1.69 (m, 3H), 1.59-1.44 (m, 5H), 1.37-0.76 (m, 17H), 0.90 (d,  $J = 6.5$  Hz, 3H), 0.88 (s, 3H), 0.86 (d,  $J = 6.5$  Hz, 3H), 0.85 (d,  $J = 6.5$  Hz, 3H), 0.68 (s, 3H);  $^{13}\text{C NMR}$  (125 MHz,  $\text{CDCl}_3$ )  $\delta$  177.9, 172.3, 171.9, 140.3, 139.4, 57.2, 56.5, 55.8, 49.9, 43.4, 43.3, 42.6, 40.4, 40.3, 39.7, 38.4, 36.3 (2 carbons), 36.0, 33.5, 31.3, 31.0, 30.1, 28.5, 28.2, 24.4, 24.0, 23.0, 22.8 (2 carbons), 18.8, 18.6, 12.4, 10.8; **HRMS** (ESI):  $m/z$ : calculated for  $\text{C}_{35}\text{H}_{58}\text{N}_2\text{O}_4\text{Na}$ :  $[\text{M} + \text{Na}]^+$  593.4289, found 593.4298. LC-MS ( $t_{\text{R}} = 2.99$  min,  $\lambda = 254$  nm, purity 97%).

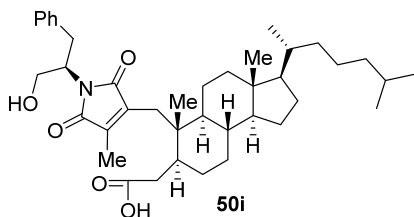

**50i**, Pale yellow solid, 43.6 mg, yield 70%.  $^1\text{H NMR}$  (500 MHz,  $\text{CDCl}_3$ )  $\delta$  7.24-7.21 (m, 2H), 7.18-7.12 (m, 3H), 4.42 (qd,  $J = 8.5, 3.5$  Hz, 1H), 4.06 (dd,  $J = 12.0, 8.5$  Hz, 1H), 3.74 (dd,  $J = 12.0, 3.5$  Hz, 1H), 3.05-2.94 (m, 3H), 2.45 (s, 2H), 2.02 (dt,  $J = 12.5, 3.5$  Hz, 1H), 1.95-1.88 (m, 1H), 1.92 (s, 3H), 1.86-1.73 (m, 2H), 1.55-0.92 (m, 21H), 0.90 (d,  $J = 6.5$  Hz, 3H), 0.86 (d,  $J = 7.0$  Hz, 3H), 0.86 (s, 3H), 0.85 (d,  $J = 6.5$  Hz, 3H), 0.82-0.63 (m, 2H), 0.68 (s, 3H);  $^{13}\text{C NMR}$  (125 MHz,  $\text{CDCl}_3$ )  $\delta$  178.4, 173.5, 172.2, 139.3, 138.8, 137.6, 129.2, 128.7, 126.8, 61.7, 57.1, 56.5, 55.2, 48.7, 43.0, 42.6, 40.4, 40.0, 39.7, 36.5, 36.3, 36.0, 35.2, 30.8, 30.3, 29.2, 28.5, 28.2, 24.3, 24.0, 23.0, 22.9, 22.8, 18.8, 16.6, 12.5, 10.7; **HRMS** (ESI):  $m/z$ : calculated for  $\text{C}_{40}\text{H}_{59}\text{NO}_5\text{Na}$ :  $[\text{M} + \text{Na}]^+$  656.4285, found 656.4274. LC-MS ( $t_{\text{R}} = 3.84$  min,  $\lambda = 254$  nm, purity >99%).

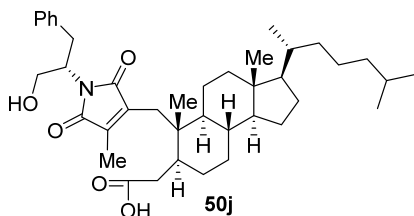

**50j**, Pale yellow solid, 44.3 mg, yield 70%.  $^1\text{H NMR}$  (500 MHz,  $\text{CDCl}_3$ )  $\delta$  7.23-7.14 (m, 5H), 4.38



(dtd,  $J = 9.5, 7.5, 4.0$  Hz, 1H), 3.93 (dd,  $J = 12.0, 7.0$  Hz, 1H), 3.79 (dd,  $J = 12.0, 4.0$  Hz, 1H), 3.11-3.01 (m, 2H), 2.95 (d,  $J = 16.5$  Hz, 1H), 2.42 (d,  $J = 14.5$  Hz, 1H), 2.35 (d,  $J = 14.0$  Hz, 1H), 2.00 (dt,  $J = 13.0, 3.5$  Hz, 1H), 1.95 (s, 3H), 1.92 (dd,  $J = 17.0, 11.0$  Hz, 1H), 1.87-1.80 (m, 1H), 1.72 (dq,  $J = 14.0, 3.5$  Hz, 1H), 1.62 (dq,  $J = 13.0, 3.5$  Hz, 1H), 1.57-1.48 (m, 4H), 1.43 (dd,  $J = 13.0, 3.5$  Hz, 1H), 1.39-0.94 (m, 14H), 0.90 (d,  $J = 6.5$  Hz, 3H), 0.87 (d,  $J = 6.5$  Hz, 3H), 0.86 (d,  $J = 6.5$  Hz, 3H), 0.82 (s, 3H), 0.78-0.64 (m, 2H), 0.68 (s, 3H);  $^{13}\text{C NMR}$  (125 MHz,  $\text{CDCl}_3$ )  $\delta$  178.6, 173.2, 172.5, 139.9, 138.8, 138.0, 129.3, 128.6, 126.7, 63.1, 57.0, 56.4, 55.6, 49.1, 42.7, 42.6, 40.4, 40.0, 39.7, 36.9, 36.6, 36.3, 36.0, 34.9, 31.2, 30.8, 29.1, 28.5, 28.2, 24.3, 24.0, 23.0, 22.8, 18.8, 16.4, 12.5, 10.4; **HRMS** (ESI):  $m/z$ : calculated for  $\text{C}_{40}\text{H}_{59}\text{NO}_5\text{Na}$ :  $[\text{M} + \text{Na}]^+$  656.4285, found 656.4304. LC-MS ( $t_{\text{R}} = 3.79$  min,  $\lambda = 210$  nm, purity >99%).

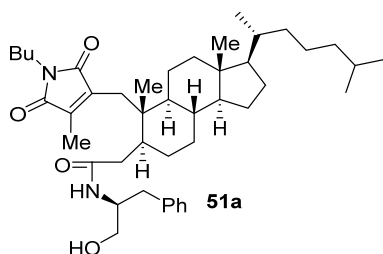

**51a**, Pale yellow solid, 39.2 mg, yield 57%.  $^1\text{H NMR}$  (500 MHz,  $\text{CDCl}_3$ )  $\delta$  7.30-7.27 (m, 2H), 7.24-7.19 (m, 3H), 6.45 (d,  $J = 7.0$  Hz, 1H), 4.15-4.09 (m, 1H), 3.76 (dt,  $J = 11.5, 4.0$  Hz, 1H), 3.53 (dt,  $J = 11.5, 5.5$  Hz, 1H), 3.49-3.38 (m, 2H), 3.23 (t,  $J = 5.5$  Hz, 1H), 2.89-2.83 (m, 3H), 2.46 (d,  $J = 14.5$  Hz, 1H), 2.41 (d,  $J = 14.0$  Hz, 1H), 2.03 (s, 3H), 2.00 (dt,  $J = 13.0, 3.0$  Hz, 1H), 1.85-1.76 (m, 2H), 1.72 (dq,  $J = 14.0, 3.5$  Hz, 1H), 1.66 (dq,  $J = 13.5, 3.5$  Hz, 1H), 1.56-0.95 (m, 22H), 0.93 (t,  $J = 7.5$  Hz, 3H), 0.89 (d,  $J = 6.5$  Hz, 3H), 0.86 (d,  $J = 7.0$  Hz, 3H), 0.86 (d,  $J = 7.0$  Hz, 3H), 0.83 (s, 3H), 0.73-0.64 (m, 2H), 0.68 (s, 3H);  $^{13}\text{C NMR}$  (125 MHz,  $\text{CDCl}_3$ )  $\delta$  174.5, 174.0, 172.0, 140.7, 138.9, 138.3, 129.4, 128.7, 126.7, 65.0, 57.2, 56.4, 53.7, 49.2, 42.7 (2 carbons), 41.6, 40.5, 39.7, 39.2, 38.3, 37.4, 36.7, 36.3, 36.0, 31.6, 30.8, 30.7, 28.5, 28.4, 28.2, 24.2, 24.0, 23.4, 23.0, 22.8, 20.3, 18.8, 16.5, 13.9, 12.6, 10.4; **HRMS** (ESI):  $m/z$ : calculated for  $\text{C}_{44}\text{H}_{68}\text{N}_2\text{O}_4\text{Na}$ :  $[\text{M} + \text{Na}]^+$  711.5071, found 711.5097.

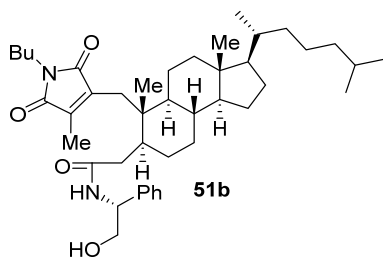

**51b**, Pale yellow solid, 14.8 mg, yield 22%.  $^1\text{H NMR}$  (500 MHz,  $\text{CDCl}_3$ )  $\delta$  7.36-7.28 (m, 6H), 5.04 (td,  $J = 6.5, 4.0$  Hz, 1H), 3.92 (dd,  $J = 11.5, 7.0$  Hz, 1H), 3.87 (dd,  $J = 11.5, 3.5$  Hz, 1H), 3.34 (dt,  $J = 14.0, 7.0$  Hz, 1H), 3.22 (dt,  $J = 14.0, 7.0$  Hz, 1H), 3.04 (dd,  $J = 12.5, 2.5$  Hz, 1H), 2.50 (d,  $J = 14.0$  Hz, 1H), 2.41 (d,  $J = 14.5$  Hz, 1H), 2.02 (s, 3H), 2.02-1.92 (m, 2H), 1.83-1.76 (m, 2H), 1.63-0.83 (m, 38H), 0.68 (s, 3H), 0.68-0.60 (m, 2H);  $^{13}\text{C NMR}$  (125 MHz,  $\text{CDCl}_3$ )  $\delta$  174.9, 174.2, 172.0, 141.0, 139.5, 138.9, 128.9, 128.0, 127.0, 68.0, 57.1 (2 carbons), 56.4, 49.4, 42.7, 42.5, 42.3, 40.4, 39.7 (2 carbons), 38.2, 36.7, 36.3, 36.0, 32.0, 30.7 (2 carbons), 28.4, 28.2, 27.8, 24.2, 24.0, 23.4,

23.0, 22.8, 20.2, 18.8, 16.4, 13.9, 12.6, 10.3; **HRMS** (ESI):  $m/z$ : calculated for  $C_{43}H_{66}N_2O_4Na$ :  $[M + Na]^+$  697.4915, found 697.4935.

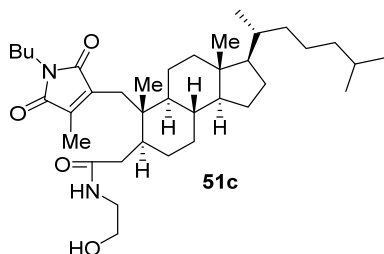

**51c**, Pale yellow solid, 25.7 mg, yield 43%. **<sup>1</sup>H NMR** (500 MHz,  $CDCl_3$ )  $\delta$  6.77 (t,  $J = 5.5$  Hz, 1H), 3.71 (dq,  $J = 11.0, 6.5, 3.5$  Hz, 2H), 3.48 (t,  $J = 7.0$  Hz, 2H), 3.44-3.34 (m, 2H), 3.21 (brs, 1H), 2.91 (dd,  $J = 13.0, 2.0$  Hz, 1H), 2.49 (d,  $J = 14.0$  Hz, 1H), 2.42 (d,  $J = 14.5$  Hz, 1H), 2.03 (s, 3H), 1.99 (dt,  $J = 12.5, 3.5$  Hz, 1H), 1.86 (dd,  $J = 13.0, 1.5$  Hz, 1H), 1.83-1.76 (m, 1H), 1.73 (dq,  $J = 13.5, 3.5$  Hz, 1H), 1.66 (dq,  $J = 13.5, 3.5$  Hz, 1H), 1.57-0.94 (m, 23H), 0.92 (t,  $J = 7.5$  Hz, 3H), 0.89 (d,  $J = 6.5$  Hz, 3H), 0.86-0.85 (m, 9H), 0.74-0.64 (m, 2H), 0.68 (s, 3H); **<sup>13</sup>C NMR** (125 MHz,  $CDCl_3$ )  $\delta$  175.3, 174.1, 172.0, 140.8, 139.0, 63.1, 57.1, 56.4, 49.4, 43.1, 42.6, 41.9, 40.4, 39.7, 39.3, 38.3, 36.7, 36.3, 36.0, 31.8, 30.8, 30.7, 28.4, 28.2, 24.2, 24.0, 23.4, 23.0, 22.8, 20.2, 18.8, 16.4, 13.9, 12.6, 10.4; **HRMS** (ESI):  $m/z$ : calculated for  $C_{37}H_{62}N_2O_4Na$ :  $[M + Na]^+$  621.4602, found 621.4618. LC-MS ( $t_R = 3.85$  min,  $\lambda = 254$  nm, purity >99%).

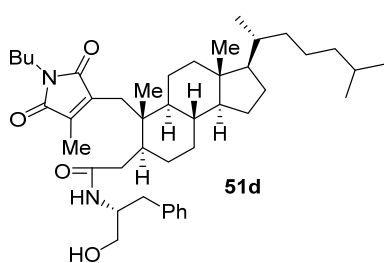

**51d**, Pale yellow solid, 22.0 mg, yield 32%. **<sup>1</sup>H NMR** (500 MHz,  $CDCl_3$ )  $\delta$  7.27-7.24 (m, 2H), 7.20-7.17 (m, 3H), 6.65 (d,  $J = 7.5$  Hz, 1H), 4.23-4.16 (m, 1H), 3.74 (dd,  $J = 11.0, 3.5$  Hz, 1H), 3.62 (dd,  $J = 11.0, 6.0$  Hz, 1H), 3.48 (dt,  $J = 7.0, 7.0$  Hz, 1H), 3.43 (dt,  $J = 7.0, 7.0$  Hz, 1H), 2.92-2.79 (m, 3H), 2.47 (d,  $J = 14.0$  Hz, 1H), 2.38 (d,  $J = 14.5$  Hz, 1H), 2.02 (s, 3H), 1.99 (dt,  $J = 13.0, 3.5$  Hz, 1H), 1.82 (t,  $J = 12.5$  Hz, 2H), 1.63-0.95 (m, 25H), 0.93 (t,  $J = 7.5$  Hz, 3H), 0.89 (d,  $J = 6.5$  Hz, 3H), 0.87 (d,  $J = 7.0$  Hz, 3H), 0.86 (d,  $J = 6.5$  Hz, 3H), 0.82 (s, 3H), 0.68-0.62 (m, 1H), 0.67 (s, 3H), 0.55 (qd,  $J = 13.0, 3.0$  Hz, 1H); **<sup>13</sup>C NMR** (125 MHz,  $CDCl_3$ )  $\delta$  174.4, 174.1, 172.0, 140.9, 139.0, 138.2, 129.3, 128.7, 126.7, 65.5, 57.2, 56.4, 53.3, 49.6, 42.7, 42.4, 42.2, 40.4, 39.8, 39.7, 38.3, 37.3, 36.7, 36.3, 36.0, 32.1, 30.8, 29.9, 28.5, 28.3, 27.8, 24.3, 24.0, 23.4, 23.0, 22.8, 20.3, 18.9, 16.3, 13.9, 12.6, 10.4; **HRMS** (ESI):  $m/z$ : calculated for  $C_{44}H_{68}N_2O_4Na$ :  $[M + Na]^+$  711.5071, found 711.5090.

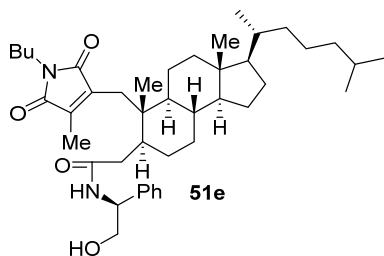

**51e**, Pale yellow solid, 40.4 mg, yield 60%.  $^1\text{H NMR}$  (500 MHz,  $\text{CDCl}_3$ )  $\delta$  7.39-7.28 (m, 5H), 7.04 (d,  $J = 7.5$  Hz, 1H), 5.09 (td,  $J = 6.5, 4.0$  Hz, 1H), 3.88-3.81 (m, 2H), 3.44 (dt,  $J = 14.0, 7.0$  Hz, 1H), 3.36 (dt,  $J = 14.0, 7.0$  Hz, 1H), 3.23 (brs, 1H), 2.98 (dd,  $J = 13.5, 1.5$  Hz, 1H), 2.48 (d,  $J = 14.0$  Hz, 1H), 2.42 (d,  $J = 14.0$  Hz, 1H), 2.03 (s, 3H), 2.00 (dt,  $J = 13.0, 3.5$  Hz, 1H), 1.90 (dd,  $J = 13.0, 12.0$  Hz, 1H), 1.83-1.78 (m, 2H), 1.67-0.81 (m, 39H), 0.78-0.64 (m, 2H), 0.69 (s, 3H);  $^{13}\text{C NMR}$  (125 MHz,  $\text{CDCl}_3$ )  $\delta$  174.6, 174.1, 172.0, 140.8, 139.5, 138.9, 129.0, 128.0, 127.2, 67.5, 57.1, 56.5, 56.4, 49.3, 42.7, 42.6, 41.9, 40.5, 39.7, 39.5, 38.3, 36.7, 36.3, 36.0, 31.8, 30.8 (2 carbons), 28.5, 28.2, 24.2, 24.0, 23.4, 23.0, 22.8, 20.2, 18.8, 16.5, 13.9, 12.6, 10.3; **HRMS** (ESI):  $m/z$ : calculated for  $\text{C}_{43}\text{H}_{66}\text{N}_2\text{O}_4\text{Na}$ :  $[\text{M} + \text{Na}]^+$  697.4915, found 697.4933.

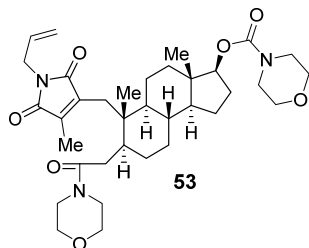

**53**, yield: (56.2 mg, 90%).  $^1\text{H NMR}$  (500 MHz,  $\text{CDCl}_3$ )  $\delta$  5.77 (ddt,  $J = 16.1, 10.7, 5.6$  Hz, 1H), 5.20 – 5.04 (m, 2H), 4.59 (dd,  $J = 9.2, 7.7$  Hz, 1H), 4.17 – 3.88 (m, 2H), 3.90 – 3.37 (m, 16H), 2.83 (d,  $J = 15.8$  Hz, 1H), 2.58 – 2.36 (m, 2H), 2.16 (dtd,  $J = 13.9, 9.4, 6.3$  Hz, 1H), 1.99 (s, 3H), 1.79 (dddd,  $J = 55.8, 29.6, 13.1, 3.2$  Hz, 5H), 1.62 (tdt,  $J = 9.4, 6.7, 3.0$  Hz, 1H), 1.58 – 1.48 (m, 2H), 1.43 (qd,  $J = 13.3, 3.4$  Hz, 1H), 1.27 (dq,  $J = 24.0, 13.0, 12.0, 3.5$  Hz, 3H), 1.14 – 0.97 (m, 2H), 0.97 – 0.85 (m, 4H), 0.81 (s, 3H).  $^{13}\text{C NMR}$  (126 MHz,  $\text{CDCl}_3$ )  $\delta$  171.9, 171.4, 170.8, 155.5, 139.6, 138.8, 132.0, 117.2, 83.6, 66.9, 66.6, 51.1, 49.5, 42.8, 42.5, 40.2, 39.7, 37.2, 36.2, 34.7, 31.0, 30.1, 29.3, 27.9, 23.4, 22.3, 16.5, 12.5, 10.2. **HRMS** (ESI)  $m/z$ : anal. calculated for  $[\text{C}_{35}\text{H}_{51}\text{N}_3\text{O}_7 + \text{Na}]^+$ : 648.3619, found: 648.3622. LC-MS ( $t_R = 3.06$  min,  $\lambda = 254$  nm, purity 99%).

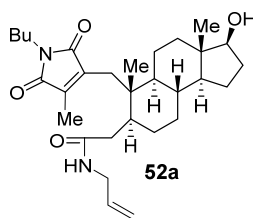

**52a**, yield: (41.8 mg, 84%).  $^1\text{H NMR}$  (500 MHz,  $\text{CDCl}_3$ )  $\delta$  6.58 (t,  $J = 5.7$  Hz, 1H), 5.85 (ddt,  $J = 17.3, 10.7, 5.5$  Hz, 1H), 5.19 (dq,  $J = 17.1, 1.8$  Hz, 1H), 5.10 (dq,  $J = 10.4, 1.6$  Hz, 1H), 3.87 (tt,  $J = 5.6, 1.7$  Hz, 2H), 3.61 (t,  $J = 8.5$  Hz, 1H), 3.46 (td,  $J = 7.0, 1.5$  Hz, 2H), 3.03 – 2.84 (m, 1H), 2.51 (d,  $J = 14.4$  Hz, 1H), 2.43 (d,  $J = 14.2$  Hz, 1H), 2.02 (s, 3H), 1.92 – 1.80 (m, 2H), 1.76 (dq,  $J = 13.9, 3.4$  Hz, 1H), 1.70 (dq,  $J = 13.8, 3.5$  Hz, 1H), 1.62 – 1.35 (m, 6H), 1.35 – 1.10 (m, 4H), 1.02 (td,  $J = 12.7, 3.5$  Hz, 1H), 0.91 (t,  $J = 7.4$  Hz, 3H), 0.87 (s, 3H), 0.77 (s, 3H), 0.75 – 0.59 (m, 2H).  $^{13}\text{C NMR}$  (126 MHz,  $\text{CDCl}_3$ )  $\delta$  173.7, 173.2, 171.8, 140.5, 138.6, 134.7, 115.5, 81.7, 51.4, 49.5, 42.8, 42.4, 42.1, 41.7, 39.3, 38.0, 37.0, 36.5, 31.7, 30.6, 30.5, 30.1, 27.5, 23.2, 22.7, 20.0, 16.1, 13.6, 11.5, 10.0. **HRMS** (ESI)  $m/z$ : anal. calculated for  $[\text{C}_{30}\text{H}_{46}\text{N}_2\text{O}_4 + \text{Na}]^+$ : 521.3350, found: 521.3356. LC-MS ( $t_R = 3.23$  min,  $\lambda = 254$  nm, purity 97%).

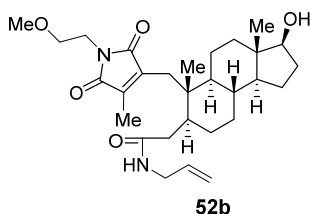

**52b**, yield: (36.0 mg, 72%).  $^1\text{H NMR}$  (500 MHz,  $\text{CDCl}_3$ )  $\delta$  6.63 (t,  $J = 5.7$  Hz, 1H), 5.86 (ddt,  $J = 17.2, 10.6, 5.5$  Hz, 1H), 5.24 – 5.05 (m, 2H), 3.87 (ddt,  $J = 5.6, 3.9, 1.6$  Hz, 2H), 3.62 (t,  $J = 8.5$  Hz, 1H), 3.47 (td,  $J = 7.1, 1.3$  Hz, 2H), 2.93 (dd,  $J = 12.9, 2.4$  Hz, 1H), 2.52 (d,  $J = 14.2$  Hz, 1H), 2.44 (d,  $J = 14.2$  Hz, 1H), 2.03 (s, 4H), 1.94 – 1.81 (m, 3H), 1.77 (dq,  $J = 13.7, 3.2$  Hz, 1H), 1.70 (dq,  $J = 13.8, 3.5$  Hz, 1H), 1.64 – 1.38 (m, 7H), 1.36 – 1.11 (m, 5H), 1.10 – 1.00 (m, 1H), 0.92 (t,  $J = 7.4$  Hz, 4H), 0.88 (s, 3H), 0.77 (s, 3H), 0.76 – 0.68 (m, 1H).  $^{13}\text{C NMR}$  (126 MHz,  $\text{CDCl}_3$ )  $\delta$  173.6, 173.1, 171.7, 140.4, 138.5, 134.6, 115.4, 81.5, 51.4, 49.4, 42.8, 42.4, 42.0, 41.6, 39.2, 37.9, 36.9, 36.5, 31.6, 30.5, 30.4, 30.0, 27.4, 23.2, 22.6, 19.9, 16.1, 13.5, 11.4, 10.0. **HRMS** (ESI)  $m/z$ : anal. calculated for  $[\text{C}_{29}\text{H}_{44}\text{N}_2\text{O}_5 + \text{Na}]^+$ : 523.3142, found: 523.3152. LC-MS ( $t_R = 2.35$  min,  $\lambda = 254$  nm, purity 96%).

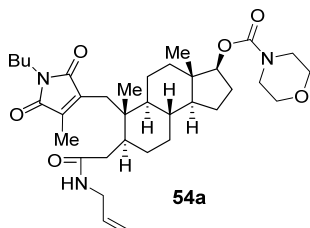

**54a**, yield: (46.4 mg, 77%).  $^1\text{H NMR}$  (400 MHz,  $\text{CDCl}_3$ )  $\delta$  6.51 (t,  $J = 5.7$  Hz, 1H), 5.86 (ddt,  $J = 17.2, 10.6, 5.5$  Hz, 1H), 5.19 (dq,  $J = 17.2, 1.7$  Hz, 1H), 5.10 (dq,  $J = 10.3, 1.5$  Hz, 1H), 4.65 – 4.45 (m, 1H), 4.01 – 3.80 (m, 2H), 3.77 – 3.58 (m, 6H), 3.58 – 3.37 (m, 6H), 3.31 (s, 3H), 2.95 (dd,  $J = 13.0, 2.3$  Hz, 1H), 2.53 (d,  $J = 14.4$  Hz, 1H), 2.43 (d,  $J = 14.2$  Hz, 1H), 2.27 – 2.07 (m, 1H), 2.02 (s, 3H), 1.96 – 1.67 (m, 4H), 1.67 – 1.38 (m, 5H), 1.38 – 1.11 (m, 4H), 1.11 – 0.98 (m, 1H), 0.88 (s, 3H), 0.81 (s, 3H), 0.81 – 0.58 (m, 2H).  $^{13}\text{C NMR}$  (101 MHz,  $\text{CDCl}_3$ )  $\delta$  173.5, 173.1, 171.5, 155.4, 140.7, 138.7, 134.8, 115.5, 83.5, 69.2, 66.5, 58.6, 51.0, 49.3, 44.1, 42.6, 42.5, 41.9, 41.7, 39.3, 37.4, 37.2, 36.3, 31.7, 30.0, 27.9, 27.6, 23.3, 22.5, 16.1, 12.6, 10.1. **HRMS** (ESI)  $m/z$ : anal. calculated for  $[\text{C}_{35}\text{H}_{53}\text{N}_3\text{O}_6 + \text{Na}]^+$ : 634.3827, found: 634.3827. LC-MS ( $t_R = 3.38$  min,  $\lambda = 254$  nm, purity 99%).

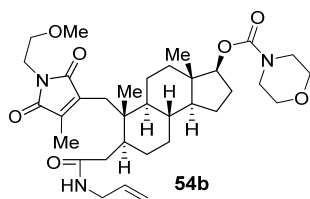

**54b**, yield: (43.5 mg, 71%).  $^1\text{H NMR}$  (500 MHz,  $\text{CDCl}_3$ )  $\delta$  6.50 (t,  $J = 5.7$  Hz, 1H), 5.97 – 5.76 (m, 1H), 5.18 (dt,  $J = 17.2, 1.6$  Hz, 1H), 5.09 (dt,  $J = 10.4, 1.6$  Hz, 1H), 4.02 – 3.77 (m, 2H), 3.77 – 3.55 (m, 3H), 3.56 – 3.44 (m, 2H), 3.29 (s, 3H), 2.91 (dd,  $J = 12.9, 2.3$  Hz, 1H), 2.52 (d,  $J = 14.0$  Hz, 1H), 2.43 (d,  $J = 14.2$  Hz, 1H), 2.02 (s, 3H), 1.89 – 1.80 (m, 2H), 1.76 (dq,  $J = 13.8, 3.6$  Hz, 1H), 1.73 – 1.59 (m, 2H), 1.59 – 1.34 (m, 5H), 1.33 – 1.09 (m, 3H), 1.02 (td,  $J = 12.8, 3.7$  Hz, 1H), 0.92

(dd,  $J = 11.2, 7.2$  Hz, 1H), 0.87 (s, 3H), 0.76 (s, 3H), 0.74 – 0.58 (m, 2H).  $^{13}\text{C}$  NMR (126 MHz,  $\text{CDCl}_3$ )  $\delta$  173.5, 173.1, 171.6, 140.6, 138.9, 134.7, 115.5, 81.6, 69.2, 58.5, 51.4, 49.5, 42.8, 42.5, 42.0, 41.7, 39.3, 37.4, 37.0, 36.5, 31.8, 30.5, 30.0, 27.6, 23.2, 22.7, 16.1, 11.5, 10.0. HRMS (ESI)  $m/z$ : anal. calculated for  $[\text{C}_{34}\text{H}_{51}\text{N}_3\text{O}_7 + \text{Na}]^+$ : 636.3619, found: 636.3634. LC-MS ( $t_{\text{R}} = 3.17$  min,  $\lambda = 210$  nm, purity 97%).

### Cheminformatic analysis of medium ring library.

#### Principal component analysis (PCA)

To generate the plots shown in **Fig. 6a–c** of the manuscript and **Supplementary Fig. 4**, a total of 145 compounds were compared by principal component analysis (PCA):

- 25 top steroid drugs by prescriptions and retail sales in 2016 (**Supp. Fig. 17**)
- 40 top selling small molecule drugs in 2016 without including steroid drugs (**Supp. Fig. 18**)
- 25 steroid and terpenoid natural products with diverse oxidative stage and skeleton (**Supp. Fig. 19**). Notes: The first seven compounds are starting materials we used for the preparation of our library. The next six compounds are steroids with different oxidative stage. These oxidative steroids were included because the increase of oxidative stage is the key diversity element in the first phase of our library synthesis. The remaining 12 terpenoid natural products represent skeleton diversity of steroid analogues because increase of skeleton diversity is the key element in the second phase of our library synthesis. In summary, the set of 25 steroid and terpenoid natural products was selected to represent “oxidative stage diversity” and “skeleton diversity”.
- 25 medium-sized ring natural products (**Supp. Fig. 20**). Notes: The 25 diverse natural products with a medium-sized ring represent medium-sized ring natural products with 7-11 membered *N*-heterocyclic, *O*-heterocyclic and carbocyclic rings with skeleton and functional group diversity.
- 30 medium-sized ring library members (**Supp. Fig. 3**). Notes: The structures presented in **Supp. Fig. 3** and **Supp. Fig. 17-20** are those used for computing the descriptors.

A set of 20 physicochemical properties (**Supplementary Table 1**) for all 145 compounds, were calculated using the Molecular Operating Environment (v2016.08, Chemical Computing Group, Montreal). The mean average value for each parameter was calculated for each compound series (**Supplementary Table 2**). This hypothetical average structure for each series was also included in the PCA analysis.

The MOE descriptor names are given in the table. (**Supplementary Table 1**) Descriptors that are not explicitly part of the MOE Descriptor Calculation mode are all easily calculated from MOE SVL functions (aInRing, aInHRing, R and S from aRSChirality) or from combinations of other descriptor values (deltaRS, fChiralMW and fArRing).

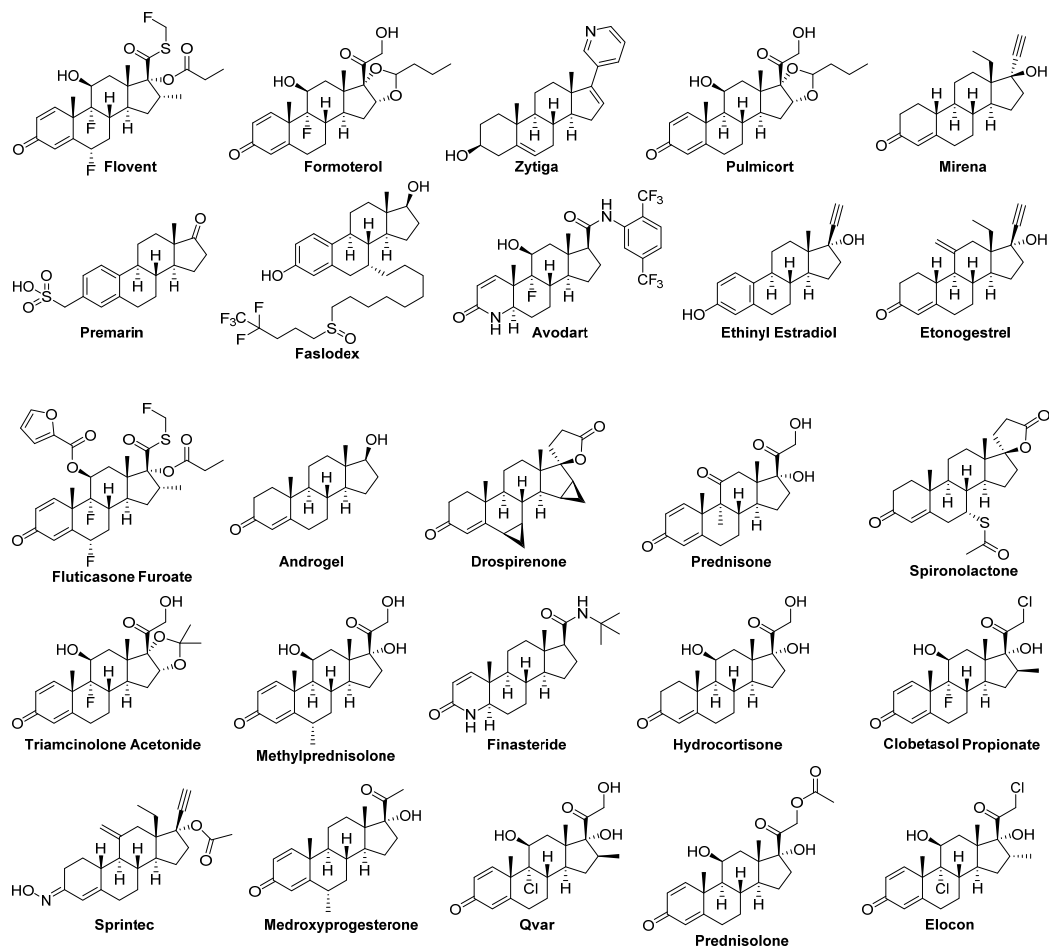

Supplementary Figure 17. Steroid drug reference set for PCA and PMI analyses (25 structures, top steroid drugs by prescriptions and retail sales in 2016).

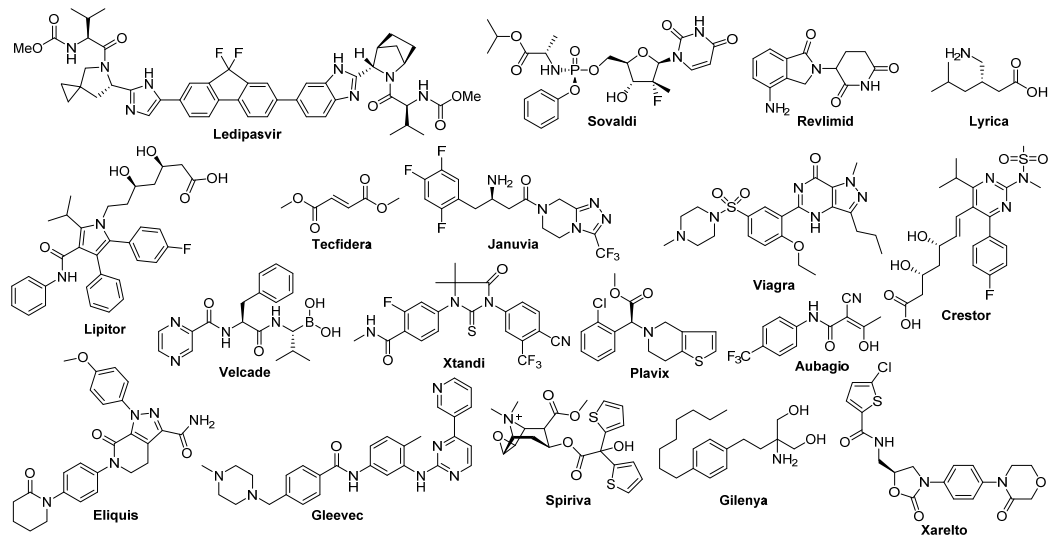

no particular order. (40 structures). (continued on next page)

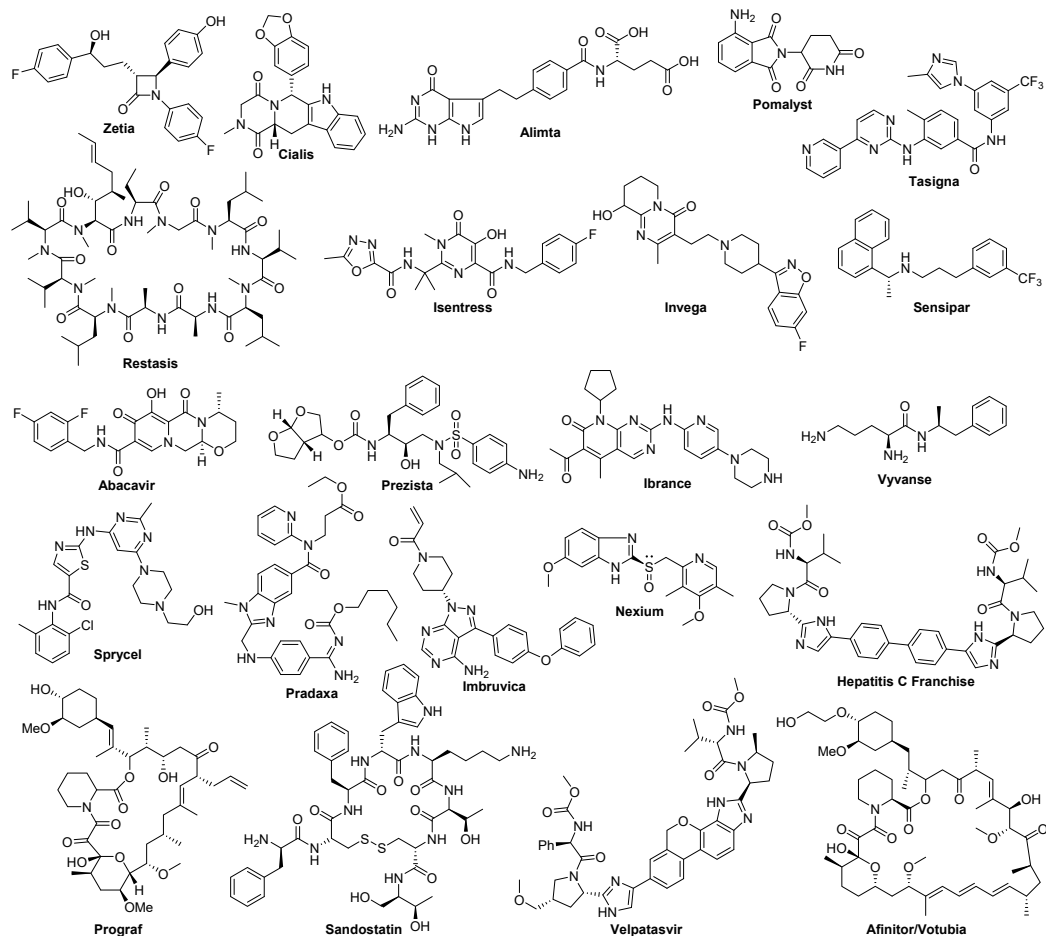

Supplementary Figure 18 (continued). Top pharmaceutical products reference set for PCA and PMI analyses by retail sales in 2016 (steroid drugs were not included here) structures are shown in no particular order. (40 structures).

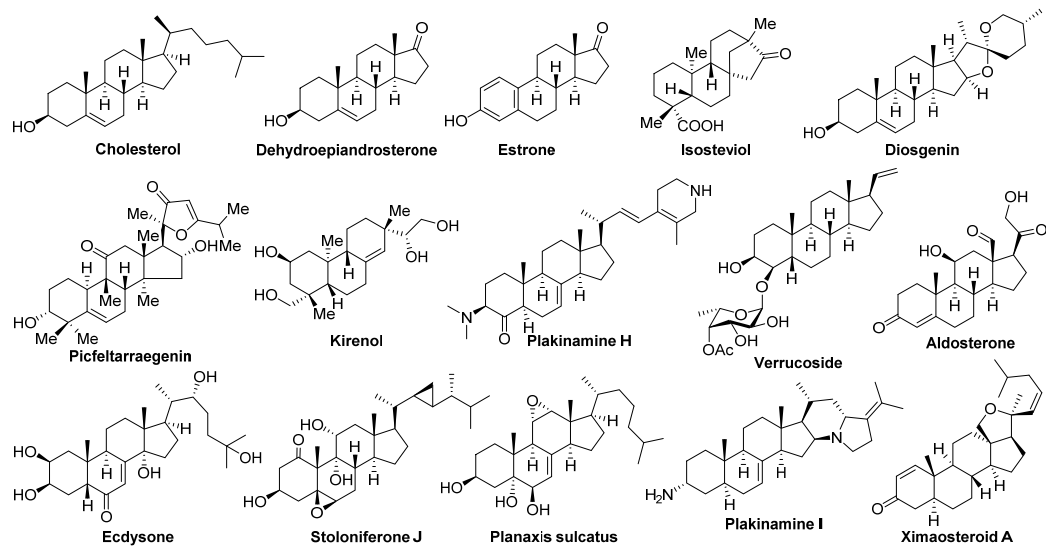

Supplementary Figure 19. Steroid and terpenoid natural products reference set with oxidative stage diversity and skeleton diversity for PCA and PMI (25 structures). (continued on next

page)

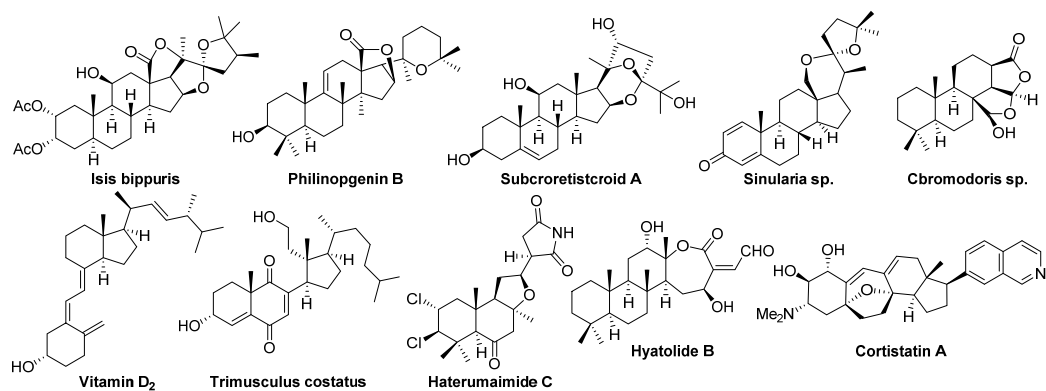

**Supplementary Figure 19 (continued). Steroid and terpenoid natural products reference set with oxidative stage diversity and skeleton diversity for PCA and PMI (25 structures).**

Medium-sized ring natural products contain 7-membered ring.

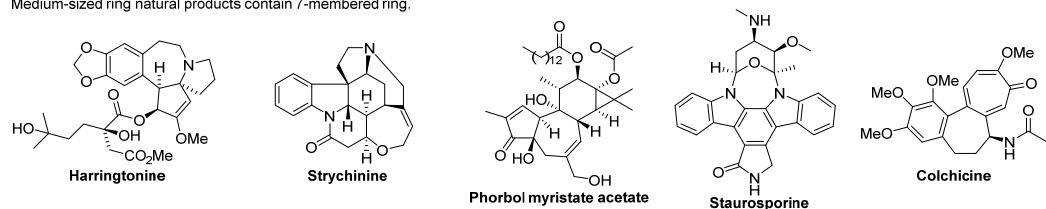

Medium-sized ring natural products contain 8-membered ring.

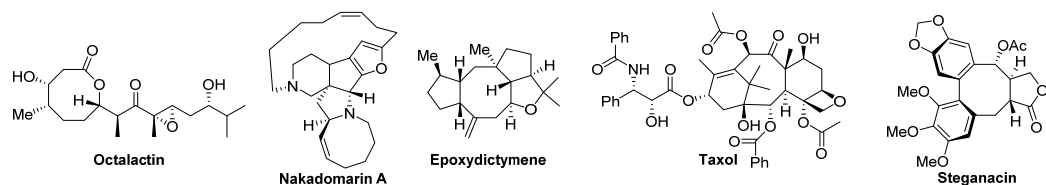

Medium-sized ring natural products contain 9-membered ring.

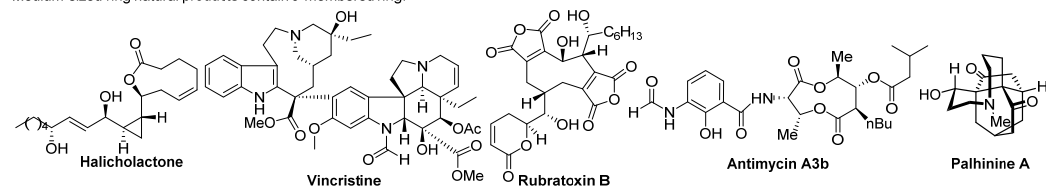

Medium-sized ring natural products contain 10-membered ring.

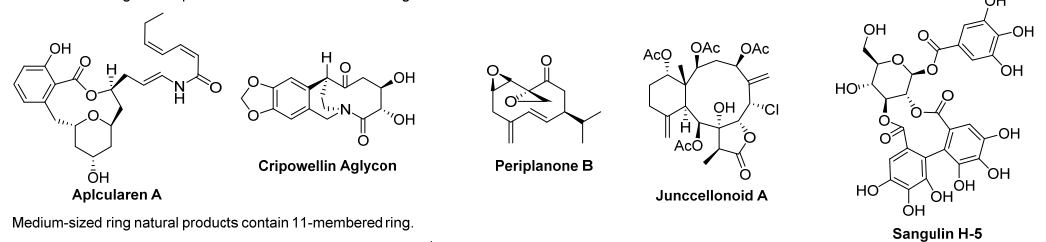

Medium-sized ring natural products contain 11-membered ring.

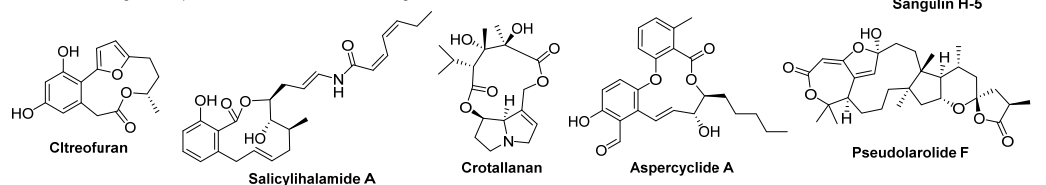

**Supplementary Figure 20. Medium ring natural products used in PCA and PMI analyses. (25)**



structures).

**Supplementary Table 1. Parameters employed in PCA.**

| Property  | Description                       |
|-----------|-----------------------------------|
| a_acc     | H-Bond Acceptors                  |
| a_don     | H-Bond Donors                     |
| a_nN      | Number of N atoms                 |
| a_nO      | Number of O atoms                 |
| b_rotN    | Number of rotatable bonds         |
| b_rotR    | Fraction of rotatable bonds       |
| chiral    | Number of chiral centers          |
| logS      | Solubility                        |
| opr_nring | OpreaRingCount                    |
| rings     | Number of Rings                   |
| SlogP     | LogP                              |
| TPSA      | Polar Surface Area                |
| Weight    | MW                                |
| aRing     | Number of Atoms in rings          |
| aArRing   | Number of Atoms in Aromatic rings |
| fArRing   | aInHRing/aInRing                  |
| fChiralWT | chiral/Weight                     |
| R         | Number of R centers               |
| S         | Number of S centers               |
| deltaRS   | R-S                               |

**Supplementary Table 2. Average parameters by compound series.**

| AVG              | Ster Drugs | Drugs    | Med NPs  | Ster NPs | Med Lib  |
|------------------|------------|----------|----------|----------|----------|
| <b>a_acc</b>     | 3.64       | 5.725    | 5.52     | 3.64     | 4.066667 |
| <b>a_don</b>     | 1.76       | 2.85     | 2.12     | 1.8      | 1.2      |
| <b>a_nN</b>      | 0.32       | 4.175    | 0.88     | 0.28     | 1.433333 |
| <b>a_nO</b>      | 3.84       | 4.575    | 6.76     | 3.68     | 4.966667 |
| <b>b_rotN</b>    | 3.36       | 8.3      | 5.32     | 2.52     | 5.033333 |
| <b>b_rotR</b>    | 0.099261   | 0.23118  | 0.134602 | 0.073338 | 0.115841 |
| <b>chiral</b>    | 6.92       | 2.7      | 5.24     | 8.76     | 7.433333 |
| <b>logS</b>      | -5.03341   | -5.12016 | -4.73232 | -6.05492 | -6.59984 |
| <b>opr_nring</b> | 4.28       | 3.6      | 3.64     | 4.8      | 4.933333 |
| <b>rings</b>     | 4.28       | 3.7      | 4.28     | 4.8      | 5.133333 |
| <b>SlogP</b>     | 3.801621   | 3.208221 | 2.96813  | 4.609051 | 4.935359 |
| <b>TPSA</b>      | 70.8444    | 119.0815 | 106.9536 | 63.5132  | 84.84667 |
| <b>Weight</b>    | 401.2981   | 496.0485 | 456.3872 | 416.4329 | 495.5132 |
| <b>aRing</b>     | 18.12      | 21.05    | 20.36    | 20.16    | 24.16667 |
| <b>aArRing</b>   | 1.88       | 12.45    | 6.12     | 0.64     | 3.366667 |

|                  |          |          |          |          |          |
|------------------|----------|----------|----------|----------|----------|
| <b>fArRing</b>   | 0.112313 | 0.620504 | 0.265271 | 0.027911 | 0.128273 |
| <b>fChiralWT</b> | 0.017493 | 0.004341 | 0.011749 | 0.020835 | 0.015097 |
| <b>R</b>         | 2.24     | 1.325    | 2.72     | 4.4      | 2.966667 |
| <b>S</b>         | 4.72     | 1.475    | 2.84     | 4.4      | 4.466667 |
| <b>deltaRS</b>   | -2.48    | -0.15    | -0.12    | 0        | -1.5     |

Principal component analysis was then carried out using the procedure outlined by Tan.<sup>[11]</sup> This resulted in the construction of 3 plots of PC1/PC2, PC1/PC3 and PC2/PC3 (**Supplementary Fig. 4a-c**). Summary information from R (the open source statistical computing package used for the PCA analysis) is shown below in **Supplementary Table 3**.

**Supplementary Table 3. Standard deviation and proportion of variance for each component in PCA plot (R Summary).**

|                        | PC1    | PC2    | PC3    | PC4     | PC5     | PC6     | PC7     | PC8     | PC9     | PC10    |
|------------------------|--------|--------|--------|---------|---------|---------|---------|---------|---------|---------|
| Standard Deviation     | 2.4343 | 2.3637 | 1.6974 | 1.35545 | 1.2431  | 0.77439 | 0.74009 | 0.63951 | 0.48702 | 0.3564  |
| Proportion of Variance | 0.2963 | 0.2794 | 0.1441 | 0.09186 | 0.07727 | 0.02998 | 0.02739 | 0.02045 | 0.01186 | 0.00635 |
| Cumulative Proportion  | 0.2963 | 0.5756 | 0.7197 | 0.81157 | 0.88883 | 0.91882 | 0.9462  | 0.96665 | 0.97851 | 0.98486 |

This data shows that of the 20-dimensional dataset, >90% of the variance is accounted for within the first 6 principal components (PC1 – PC6). In order to simplify the interpretation of this data, the first 3 principal components (accounting for ~72% of the variation) were used to generate the PCA plots shown in **Fig. 6a-c**.

**Supplementary Table 4. Component loadings for PCA of each of the 20 structural and physiochemical descriptors for the first 6 principal components (PC1 – PC6).**

|                  | PC1        | PC2        | PC3        | PC4        | PC5        | PC6        |
|------------------|------------|------------|------------|------------|------------|------------|
| <b>a_acc</b>     | 0.329798   | -0.0671072 | 0.25438635 | 0.12750934 | 0.15369497 | 0.18305368 |
| <b>a_don</b>     | 0.27912506 | 0.01921988 | 0.22174865 | 0.0467632  | 0.07960758 | -0.6951455 |
| <b>a_nN</b>      | 0.29685025 | 0.10371903 | -0.1720181 | 0.11478516 | 0.01020065 | -0.2543469 |
| <b>a_nO</b>      | 0.24166884 | -0.1485845 | 0.34151278 | 0.08036167 | 0.06197324 | 0.45357125 |
| <b>b_rotN</b>    | 0.33685851 | 0.02880172 | 0.03279327 | -0.2374038 | -0.3028305 | -0.0331336 |
| <b>b_rotR</b>    | 0.20130238 | 0.19836261 | 0.1018756  | -0.3089116 | -0.3477849 | -0.0393965 |
| <b>chiral</b>    | -0.0268736 | -0.3910315 | 0.16855769 | -0.0947218 | -0.0520732 | -0.1381713 |
| <b>logS</b>      | -0.1541052 | 0.2253012  | 0.22977875 | 0.28438894 | 0.28198913 | -0.0457574 |
| <b>opr_nring</b> | 0.06139484 | -0.2678652 | -0.351451  | 0.15069489 | 0.18582394 | -0.0670989 |
| <b>rings</b>     | 0.08563166 | -0.2907151 | -0.318923  | 0.17219697 | 0.20403389 | -0.0043174 |
| <b>SlogP</b>     | 0.02182947 | -0.1969173 | -0.3718897 | -0.2970161 | -0.288737  | 0.07523319 |
| <b>TPSA</b>      | 0.35559281 | -0.0396474 | 0.2549833  | 0.11194292 | 0.04651661 | 0.02015902 |
| <b>Weight</b>    | 0.33488006 | -0.216455  | 0.02423513 | -0.0466049 | -0.098654  | 0.12459598 |
| <b>aRing</b>     | 0.23714719 | -0.2628607 | -0.209957  | 0.14602618 | 0.15405494 | 0.12268112 |
| <b>aArRing</b>   | 0.29173449 | 0.15838578 | -0.2862231 | 0.09450528 | 0.10563285 | -0.0904635 |
| <b>fArRing</b>   | 0.22072837 | 0.27646334 | -0.199584  | 0.0132127  | 0.03751628 | -0.0747786 |
| <b>fChiralWT</b> | -0.20883   | -0.3226519 | 0.1355699  | -0.0394227 | 0.00354747 | -0.3336323 |
| <b>R</b>         | 0.00753151 | -0.2896045 | 0.13412887 | -0.4190554 | 0.28920759 | -0.0931565 |

|                |            |            |            |            |            |            |
|----------------|------------|------------|------------|------------|------------|------------|
| <b>S</b>       | -0.0471995 | -0.3361565 | 0.12603017 | 0.24248684 | -0.3317587 | -0.1159127 |
| <b>deltaRS</b> | 0.04689182 | 0.05822877 | -0.0013082 | -0.5464534 | 0.51938778 | 0.02545369 |

Top contributing parameters to each principal component are marked in grey. The values were normalized automatically by the MOE software.

### Principal Moment of Inertia Analysis

Principal moment of inertia analysis was carried out by calculation of the lowest energy conformation of each representative scaffold and library compound, and each compound from the above reference set. The conformation calculation was performed using the MOE molecular modelling software package<sup>7172</sup> in a similar manner to that reported by Tan.<sup>[11]</sup>

#### The parameters used for conformer generation are listed below:

- maxConfs: 1000
- RMSD:  $\leq 0.15$
- Failure limit: 100
- Energy cutoff: 7 kcal/mol
- Iteration limit: 1000
- MM iteration limit: 500

Once the lowest energy conformer was calculated, the three principal moments of inertia ( $I_{xx}$ ,  $I_{yy}$ ,  $I_{zz}$ ) and normalized principal moments of inertia,  $npr1$  ( $I_{xx}/I_{zz}$ ) and  $npr2$  ( $I_{yy}/I_{zz}$ ) were determined using MOE. These PMI ratios were calculated for our representative scaffolds and library members, in addition to the reference sets drugs, steroid drugs steroid natural products and medium-sized ring natural products. The ratios were plotted on a triangular graph where the vertices (0,1), (0.5,0.5) and (1,1) represent a perfect rod, disc and sphere, respectively (**Fig. 6d**).

**X-Ray report.**

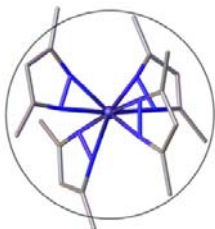

---

MOLECULAR STRUCTURE LABORATORY

---

MICHAEL M. ARISTOV, ILIA A. GUZEI, PH.D.

---

University of Wisconsin-Madison  
2124 Chemistry Department  
1101 University Ave  
Madison, WI 53706

☎ 608-263-4694  
Fax 608-262-0381

E-mail: iguzei@chem.wisc.edu

---

## Structural report on **4a**

(CCDC 1888660)

MARCH 14, 2018

Crystallographic Experimental Section

### ***Data Collection***

A colorless crystal with approximate dimensions 0.365 x 0.254 x 0.219 mm<sup>3</sup> was selected under oil under ambient conditions and attached to the tip of a MiTeGen MicroMount<sup>®</sup>. The crystal was mounted in a stream of cold nitrogen at 200(1) K and centered in the X-ray beam by using a video camera.

The crystal evaluation and data collection were performed on a Bruker SMART APEXII diffractometer with Cu K<sub>α</sub> ( $\lambda = 1.54178 \text{ \AA}$ ) radiation and the diffractometer to crystal distance of 4.03 cm [12].

The initial cell constants were obtained from three series of  $\omega$  scans at different starting angles. Each series consisted of 41 frames collected at intervals of 0.6° in a 25° range about  $\omega$  with the exposure time of 10 seconds per frame. The reflections were successfully indexed by an automated indexing routine built in the APEXII program. The final cell constants were calculated

from a set of 9982 strong reflections from the actual data collection.

The data were collected by using the full sphere data collection routine to survey the reciprocal space to the extent of a full sphere to a resolution of 0.82 Å. A total of 45302 data were harvested by collecting 14 sets of frames with 0.6° scans in  $\omega$  and  $\varphi$  with an exposure time 8-16 sec per frame. These highly redundant datasets were corrected for Lorentz and polarization effects. The absorption correction was based on fitting a function to the empirical transmission surface as sampled by multiple equivalent measurements [13].

### Structure Solution and Refinement

The systematic absences in the diffraction data were consistent for the space groups  $P3_1$ ,  $P3_2$ ,  $P3_121$ , and  $P3_221$ . Space group  $P3_221$  was chosen because it had the lowest figure of merit, yielded a chemically reasonable structure with the correct absolute configuration, and produced computationally stable results of refinement [14-19].

A successful solution by the direct methods provided most non-hydrogen atoms from the  $E$ -map. The remaining non-hydrogen atoms were located in an alternating series of least-squares cycles and difference Fourier maps. All non-hydrogen atoms were refined with anisotropic displacement coefficients. All hydrogen atoms were included in the structure factor calculation at idealized positions and were allowed to ride on the neighboring atoms with relative isotropic displacement coefficients.

The absolute structure was unequivocally established by anomalous scattering. A total of eight stereocenter were found with C6 and C19 in the  $R$  conformation with C3, C7, C10, C11, C15, and C16 in the  $S$  conformation.

The final least-squares refinement of 275 parameters against 4633 data resulted in residuals  $R$  (based on  $F^2$  for  $I \geq 2\sigma$ ) and  $wR$  (based on  $F^2$  for all data) of 0.0401 and 0.1076, respectively. The final difference Fourier map was featureless.

### Summary

**Crystal Data** for  $C_{25}H_{39}NO_4$  ( $M = 417.57$  g/mol): trigonal, space group  $P3_221$  (no. 154),  $a = 11.3911(9)$  Å,  $c = 31.049(6)$  Å,  $V = 3489.0(9)$  Å<sup>3</sup>,  $Z = 6$ ,  $T = 200.0$  K,  $\mu(\text{CuK}\alpha) = 0.630$  mm<sup>-1</sup>,  $D_{\text{calc}} = 1.192$  g/cm<sup>3</sup>, 45302 reflections measured ( $8.544^\circ \leq 2\Theta \leq 146.81^\circ$ ), 4633 unique ( $R_{\text{int}} = 0.0286$ ,  $R_{\text{sigma}} = 0.0125$ ) which were used in all calculations. The final  $R_1$  was 0.0401 ( $I > 2\sigma(I)$ ) and  $wR_2$  was 0.1076 (all data).

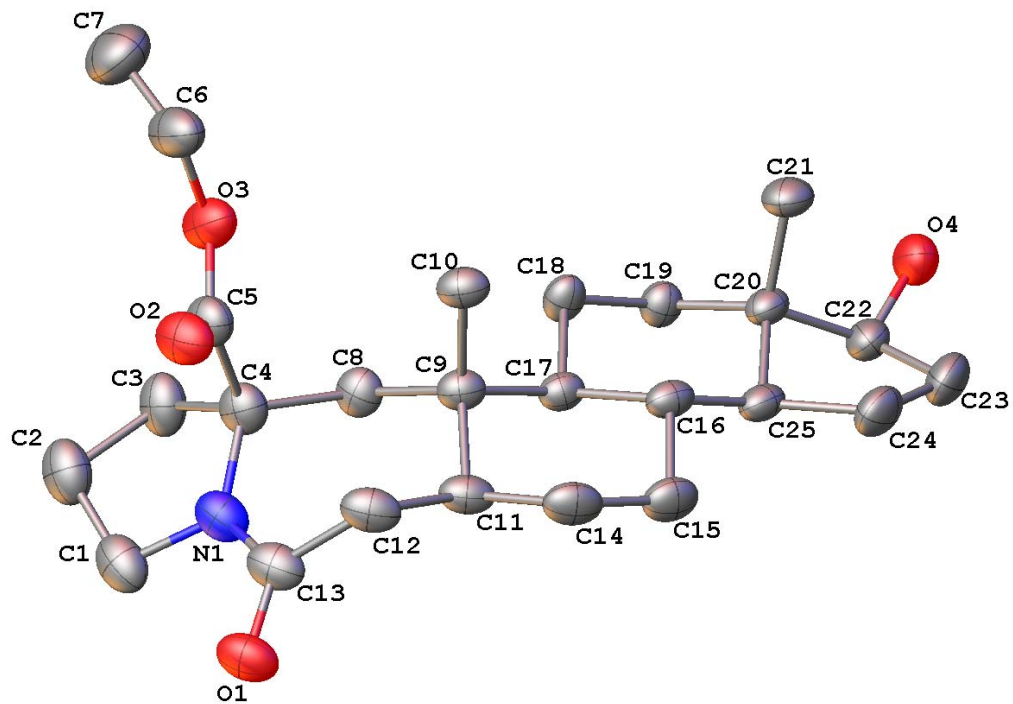

**Supplementary Figure 21.** A molecular drawing of **4a** shown with 30% probability ellipsoids. All H atoms are omitted.

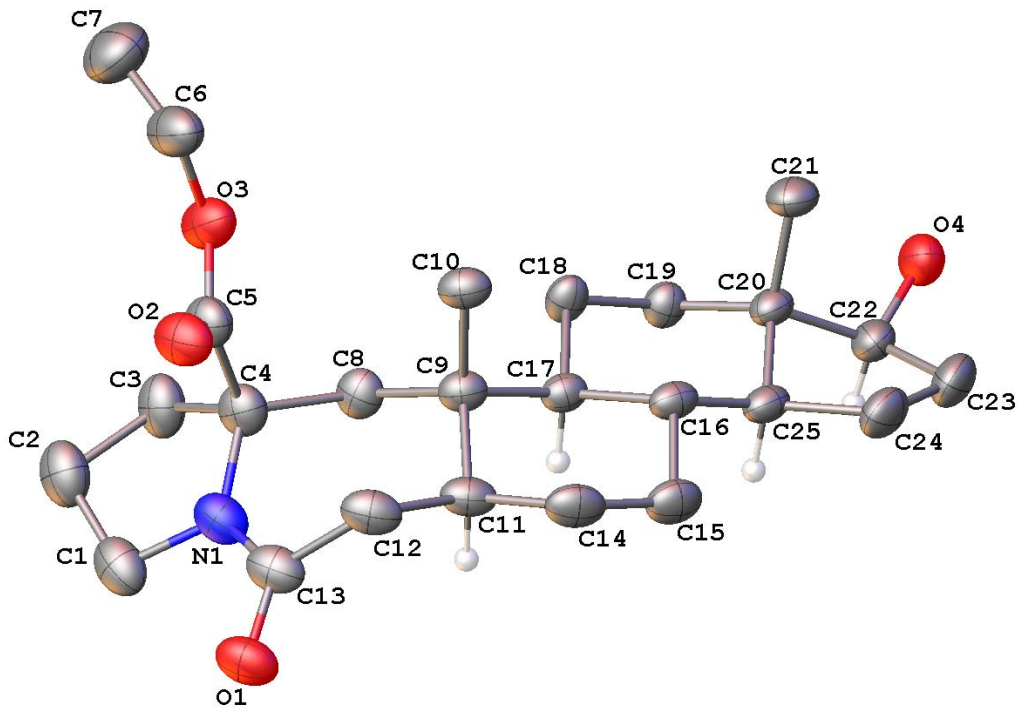

**Supplementary Figure 22.** A molecular drawing of **4a** shown with 30% probability ellipsoids. All H atoms other than those attached to stereocenter are omitted.

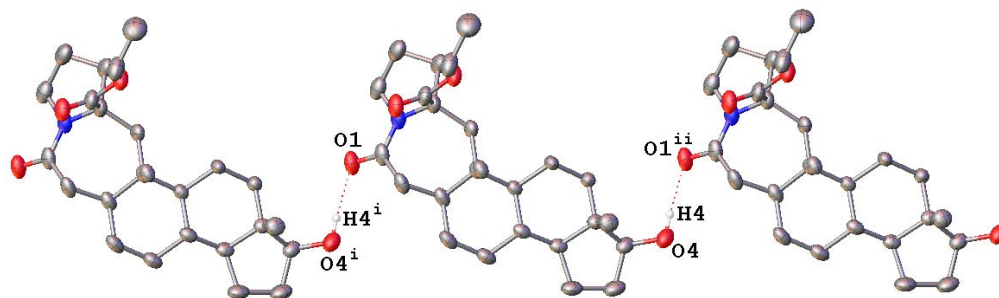

**Supplementary Figure 23.** Hydrogen bonding interactions in **4a**. The molecules are shown with 30% probability ellipsoids. H atoms not involved in the hydrogen bonding network are omitted. [Symmetry codes: (i)  $1+x, 1+y, +z$ ; (ii)  $-1+x, -1+y, +z$ .]

**Supplementary Table 5.** Crystal data and structure refinement for **4a**.

|                                               |                                                               |
|-----------------------------------------------|---------------------------------------------------------------|
| Identification code                           | <b>4a</b>                                                     |
| Empirical formula                             | $C_{25}H_{39}NO_4$                                            |
| Formula weight                                | 417.57                                                        |
| Temperature/K                                 | 200.0                                                         |
| Crystal system                                | trigonal                                                      |
| Space group                                   | $P3_221$                                                      |
| $a/\text{\AA}$                                | 11.3911(9)                                                    |
| $b/\text{\AA}$                                | 11.3911(9)                                                    |
| $c/\text{\AA}$                                | 31.049(6)                                                     |
| $\alpha/^\circ$                               | 90                                                            |
| $\beta/^\circ$                                | 90                                                            |
| $\gamma/^\circ$                               | 120                                                           |
| Volume/ $\text{\AA}^3$                        | 3489.0(9)                                                     |
| $Z$                                           | 6                                                             |
| $\rho_{\text{calc}}/\text{cm}^3$              | 1.192                                                         |
| $\mu/\text{mm}^{-1}$                          | 0.630                                                         |
| $F(000)$                                      | 1368.0                                                        |
| Crystal size/ $\text{mm}^3$                   | $0.46 \times 0.24 \times 0.21$                                |
| Radiation                                     | $\text{CuK}\alpha$ ( $\lambda = 1.54178$ )                    |
| $2\theta$ range for data collection/ $^\circ$ | 8.544 to 146.81                                               |
| Index ranges                                  | $-14 \leq h \leq 14, -13 \leq k \leq 14, -32 \leq l \leq 36$  |
| Reflections collected                         | 45302                                                         |
| Independent reflections                       | 4633 [ $R_{\text{int}} = 0.0286, R_{\text{sigma}} = 0.0125$ ] |
| Data/restraints/parameters                    | 4633/0/275                                                    |
| Goodness-of-fit on $F^2$                      | 1.030                                                         |

Final R indexes [ $I \geq 2\sigma(I)$ ]  $R_1 = 0.0401$ ,  $wR_2 = 0.1048$

Final R indexes [all data]  $R_1 = 0.0430$ ,  $wR_2 = 0.1076$

Largest diff. peak/hole /  $e \text{ \AA}^{-3}$  0.16/-0.16

Flack parameter -0.02(5)

**Supplementary Table 6.** Fractional Atomic Coordinates ( $\times 10^4$ ) and Equivalent Isotropic Displacement Parameters ( $\text{\AA}^2 \times 10^3$ ) for **4a**.  $U_{eq}$  is defined as 1/3 of the trace of the orthogonalised  $U_{ij}$  tensor.

| Atom | x           | y          | z          | U(eq)     |
|------|-------------|------------|------------|-----------|
| O1   | 11572.8(19) | 5756.8(18) | 5717.4(7)  | 78.6(5)   |
| O2   | 10210(2)    | 4551.7(19) | 6925.0(6)  | 78.5(5)   |
| O3   | 8874(2)     | 2371(2)    | 7108.1(6)  | 80.6(6)   |
| O4   | 967.0(19)   | -2362(2)   | 5345.1(6)  | 80.1(6)   |
| N1   | 10663(2)    | 3864(2)    | 6112.4(7)  | 65.6(5)   |
| C1   | 10615(3)    | 4922(2)    | 5938.7(8)  | 66.1(7)   |
| C2   | 9375(3)     | 5032(2)    | 6010.4(8)  | 65.0(6)   |
| C3   | 8084(3)     | 3892(2)    | 5799.8(7)  | 56.9(6)   |
| C4   | 7186(3)     | 4451(2)    | 5647.2(8)  | 67.1(7)   |
| C5   | 5961(3)     | 3410(2)    | 5400.2(8)  | 67.2(6)   |
| C6   | 5138(2)     | 2084(2)    | 5654.1(7)  | 51.7(5)   |
| C7   | 4007(2)     | 1014(2)    | 5383.3(6)  | 54.0(5)   |
| C8   | 2941(3)     | 1306(3)    | 5189.7(9)  | 77.9(8)   |
| C9   | 1778(3)     | -98(4)     | 5060.1(9)  | 84.2(9)   |
| C10  | 2143(3)     | -1135(3)   | 5237.9(7)  | 62.1(6)   |
| C11  | 3139(2)     | -362(2)    | 5607.0(6)  | 50.5(5)   |
| C12  | 2345(3)     | -313(3)    | 5998.0(7)  | 66.1(6)   |
| C13  | 4082(2)     | -889(2)    | 5736.4(7)  | 53.1(5)   |
| C14  | 5242(2)     | 144(2)     | 6020.9(7)  | 54.0(5)   |
| C15  | 6073(2)     | 1548(2)    | 5807.0(6)  | 47.5(4)   |
| C16  | 7296(2)     | 2604(2)    | 6082.1(7)  | 50.7(5)   |
| C17  | 6786(3)     | 2912(2)    | 6502.3(7)  | 57.5(5)   |
| C18  | 8205(2)     | 1986(2)    | 6177.7(8)  | 57.5(5)   |
| C19  | 9629(2)     | 2791(2)    | 6384.8(9)  | 63.4(6)   |
| C20  | 9614(2)     | 3369(3)    | 6831.9(9)  | 66.6(6)   |
| C21  | 8791(3)     | 2760(4)    | 7552.1(9)  | 92.4(10)  |
| C22  | 8727(5)     | 1667(5)    | 7838.2(12) | 123.2(15) |
| C23  | 10217(3)    | 1834(3)    | 6435.2(11) | 77.0(8)   |



|     |          |         |            |         |
|-----|----------|---------|------------|---------|
| C24 | 11750(3) | 2786(3) | 6428.8(11) | 84.7(9) |
| C25 | 11910(3) | 3789(3) | 6086.9(10) | 76.7(8) |

**Supplementary Table 7.** Anisotropic Displacement Parameters ( $\text{\AA}^2 \times 10^3$ ) for **4a**. The Anisotropic displacement factor exponent takes the form:  $-2\pi^2[h^2a^{*2}U_{11}+2hka^*b^*U_{12}+\dots]$ .

| Atom | $U_{11}$ | $U_{22}$ | $U_{33}$ | $U_{23}$  | $U_{13}$  | $U_{12}$ |
|------|----------|----------|----------|-----------|-----------|----------|
| O1   | 68.3(11) | 54.1(9)  | 87.1(12) | -4.0(9)   | 18.8(9)   | 10.9(8)  |
| O2   | 71.0(11) | 59.9(10) | 77.3(11) | -18.8(8)  | -1.3(9)   | 12.4(9)  |
| O3   | 69.4(11) | 68.4(11) | 68.1(11) | -2.7(9)   | -9.4(9)   | 7.6(9)   |
| O4   | 59.4(10) | 92.4(14) | 70.8(11) | 5.3(10)   | -10.4(8)  | 24.7(10) |
| N1   | 58.6(11) | 48(1)    | 78.0(14) | -15.5(9)  | 4.4(10)   | 17.4(9)  |
| C1   | 65.8(14) | 43.2(11) | 70.4(15) | -17.7(10) | 8.8(12)   | 13(1)    |
| C2   | 76.4(15) | 36.4(10) | 71.2(14) | -2.5(9)   | 18.9(12)  | 20.0(11) |
| C3   | 70.4(14) | 40.9(10) | 55.5(12) | 2.6(9)    | 19(1)     | 24.9(10) |
| C4   | 87.6(18) | 46.1(11) | 69.5(14) | 17.1(10)  | 22.4(13)  | 34.9(12) |
| C5   | 90.0(18) | 59.6(13) | 61.9(13) | 18.4(11)  | 12.0(12)  | 44.8(13) |
| C6   | 69.4(13) | 52.9(11) | 42.9(10) | 8.4(8)    | 10.4(9)   | 38.2(10) |
| C7   | 68.0(13) | 65.2(13) | 38.4(10) | 9.4(9)    | 7.1(9)    | 40.6(11) |
| C8   | 91(2)    | 97(2)    | 63.2(14) | 19.0(14)  | -4.7(14)  | 60.2(18) |
| C9   | 85.7(19) | 117(2)   | 61.5(15) | 12.1(15)  | -14.2(14) | 59.3(19) |
| C10  | 59.4(13) | 80.9(16) | 43.9(11) | 3.5(10)   | -1.8(9)   | 33.4(12) |
| C11  | 58.4(12) | 60.8(12) | 36.6(10) | 3.4(8)    | 3.0(8)    | 33.1(10) |
| C12  | 72.9(15) | 80.0(16) | 46.5(12) | 5.0(11)   | 12.1(11)  | 39.1(13) |
| C13  | 55.2(12) | 45.3(10) | 56.4(12) | 2.3(9)    | -5.9(9)   | 23.5(9)  |
| C14  | 58.1(12) | 39.6(10) | 59.0(12) | 5.9(8)    | -9.9(10)  | 20.4(9)  |
| C15  | 59.1(11) | 42.3(10) | 42.7(10) | 2.8(8)    | 4.1(8)    | 26.5(9)  |
| C16  | 60.5(12) | 37.6(9)  | 49.4(11) | -0.5(8)   | 5.1(9)    | 21.1(9)  |
| C17  | 68.6(14) | 43.9(10) | 49.9(11) | -0.6(8)   | 7.6(10)   | 20.6(10) |
| C18  | 58.8(12) | 38.5(10) | 65.5(13) | -8.5(9)   | -8.6(10)  | 17.1(9)  |
| C19  | 57.9(13) | 43.5(11) | 74.6(15) | -9.5(10)  | -7.1(11)  | 14.7(10) |
| C20  | 52.1(12) | 56.9(13) | 70.7(15) | -9.5(11)  | -7.7(11)  | 12.2(11) |
| C21  | 68.1(16) | 98(2)    | 69.8(17) | -6.7(16)  | -3.5(13)  | 10.3(16) |
| C22  | 132(4)   | 142(4)   | 79(2)    | 4(2)      | -14(2)    | 55(3)    |
| C23  | 65.8(15) | 57.3(13) | 101(2)   | -20.2(13) | -24.7(14) | 25.4(12) |
| C24  | 67.4(16) | 70.7(17) | 108(2)   | -29.6(16) | -23.2(15) | 28.3(14) |
| C25  | 59.0(14) | 68.8(16) | 90.2(18) | -31.4(15) | -7.4(13)  | 22.9(12) |

**Supplementary Table 8.** Bond Lengths for **4a**.

| Atom | Atom | Length/Å | Atom | Atom | Length/Å |
|------|------|----------|------|------|----------|
| O1   | C1   | 1.237(3) | C7   | C11  | 1.539(3) |
| O2   | C20  | 1.202(3) | C8   | C9   | 1.535(5) |
| O3   | C20  | 1.334(3) | C9   | C10  | 1.537(4) |
| O3   | C21  | 1.466(4) | C10  | C11  | 1.542(3) |
| O4   | C10  | 1.409(3) | C11  | C12  | 1.531(3) |
| N1   | C1   | 1.346(4) | C11  | C13  | 1.524(3) |
| N1   | C19  | 1.468(3) | C13  | C14  | 1.535(3) |
| N1   | C25  | 1.468(4) | C14  | C15  | 1.543(3) |
| C1   | C2   | 1.496(4) | C15  | C16  | 1.563(3) |
| C2   | C3   | 1.538(4) | C16  | C17  | 1.539(3) |
| C3   | C4   | 1.526(4) | C16  | C18  | 1.544(3) |
| C3   | C16  | 1.552(3) | C18  | C19  | 1.548(3) |
| C4   | C5   | 1.512(4) | C19  | C20  | 1.540(4) |
| C5   | C6   | 1.538(3) | C19  | C23  | 1.546(4) |
| C6   | C7   | 1.510(3) | C21  | C22  | 1.501(6) |
| C6   | C15  | 1.544(3) | C23  | C24  | 1.528(4) |
| C7   | C8   | 1.532(3) | C24  | C25  | 1.502(5) |

**Supplementary Table 9.** Bond Angles for **4a**.

| Atom | Atom | Atom | Angle/°    | Atom | Atom | Atom | Angle/°    |
|------|------|------|------------|------|------|------|------------|
| C20  | O3   | C21  | 117.1(2)   | C13  | C11  | C10  | 115.65(19) |
| C1   | N1   | C19  | 127.0(2)   | C13  | C11  | C12  | 110.53(18) |
| C1   | N1   | C25  | 120.3(2)   | C11  | C13  | C14  | 110.82(18) |
| C25  | N1   | C19  | 112.3(2)   | C13  | C14  | C15  | 113.20(17) |
| O1   | C1   | N1   | 119.7(3)   | C6   | C15  | C16  | 112.97(17) |
| O1   | C1   | C2   | 121.7(3)   | C14  | C15  | C6   | 110.77(18) |
| N1   | C1   | C2   | 118.6(2)   | C14  | C15  | C16  | 114.29(16) |
| C1   | C2   | C3   | 114.22(19) | C3   | C16  | C15  | 106.88(17) |
| C2   | C3   | C16  | 114.5(2)   | C17  | C16  | C3   | 111.65(16) |
| C4   | C3   | C2   | 109.71(19) | C17  | C16  | C15  | 110.23(18) |
| C4   | C3   | C16  | 112.25(19) | C17  | C16  | C18  | 110.90(19) |
| C5   | C4   | C3   | 112.24(19) | C18  | C16  | C3   | 109.70(18) |

|     |     |     |            |     |     |     |            |
|-----|-----|-----|------------|-----|-----|-----|------------|
| C4  | C5  | C6  | 112.38(19) | C18 | C16 | C15 | 107.31(16) |
| C5  | C6  | C15 | 110.07(19) | C16 | C18 | C19 | 123.56(18) |
| C7  | C6  | C5  | 111.23(17) | N1  | C19 | C18 | 114.8(2)   |
| C7  | C6  | C15 | 109.38(17) | N1  | C19 | C20 | 109.82(18) |
| C6  | C7  | C8  | 119.5(2)   | N1  | C19 | C23 | 101.3(2)   |
| C6  | C7  | C11 | 115.13(16) | C20 | C19 | C18 | 113.3(2)   |
| C8  | C7  | C11 | 102.9(2)   | C20 | C19 | C23 | 108.1(2)   |
| C7  | C8  | C9  | 104.0(2)   | C23 | C19 | C18 | 108.62(18) |
| C8  | C9  | C10 | 106.4(2)   | O2  | C20 | O3  | 124.3(2)   |
| O4  | C10 | C9  | 111.0(2)   | O2  | C20 | C19 | 125.1(2)   |
| O4  | C10 | C11 | 117.01(19) | O3  | C20 | C19 | 110.6(2)   |
| C9  | C10 | C11 | 103.4(2)   | O3  | C21 | C22 | 106.8(3)   |
| C7  | C11 | C10 | 99.26(16)  | C24 | C23 | C19 | 104.1(2)   |
| C12 | C11 | C7  | 114.30(19) | C25 | C24 | C23 | 102.1(2)   |
| C12 | C11 | C10 | 109.3(2)   | N1  | C25 | C24 | 104.7(2)   |
| C13 | C11 | C7  | 107.47(18) |     |     |     |            |

**Supplementary Table 10.** Torsion Angles for **4a**.

| A  | B   | C   | D   | Angle/°     | A   | B   | C   | D   | Angle/°     |
|----|-----|-----|-----|-------------|-----|-----|-----|-----|-------------|
| O1 | C1  | C2  | C3  | 112.8(2)    | C8  | C7  | C11 | C13 | 169.05(19)  |
| O4 | C10 | C11 | C7  | -165.6(2)   | C8  | C9  | C10 | O4  | 149.0(2)    |
| O4 | C10 | C11 | C12 | -45.7(3)    | C8  | C9  | C10 | C11 | 22.7(3)     |
| O4 | C10 | C11 | C13 | 79.8(3)     | C9  | C10 | C11 | C7  | -43.2(2)    |
| N1 | C1  | C2  | C3  | -65.5(3)    | C9  | C10 | C11 | C12 | 76.7(2)     |
| N1 | C19 | C20 | O2  | 10.1(4)     | C9  | C10 | C11 | C13 | -157.8(2)   |
| N1 | C19 | C20 | O3  | -168.2(2)   | C10 | C11 | C13 | C14 | 165.95(19)  |
| N1 | C19 | C23 | C24 | 32.5(3)     | C11 | C7  | C8  | C9  | -34.8(3)    |
| C1 | N1  | C19 | C18 | 57.6(3)     | C11 | C13 | C14 | C15 | -56.5(3)    |
| C1 | N1  | C19 | C20 | -71.4(3)    | C12 | C11 | C13 | C14 | -69.2(2)    |
| C1 | N1  | C19 | C23 | 174.4(2)    | C13 | C14 | C15 | C6  | 53.3(2)     |
| C1 | N1  | C25 | C24 | 161.5(2)    | C13 | C14 | C15 | C16 | -177.69(18) |
| C1 | C2  | C3  | C4  | -145.6(2)   | C14 | C15 | C16 | C3  | 174.65(18)  |
| C1 | C2  | C3  | C16 | 87.1(3)     | C14 | C15 | C16 | C17 | -63.8(2)    |
| C2 | C3  | C4  | C5  | 174.68(19)  | C14 | C15 | C16 | C18 | 57.0(2)     |
| C2 | C3  | C16 | C15 | -177.23(18) | C15 | C6  | C7  | C8  | -179.62(19) |
| C2 | C3  | C16 | C17 | 62.2(3)     | C15 | C6  | C7  | C11 | 57.1(2)     |

|                            |                          |
|----------------------------|--------------------------|
| C2 C3 C16 C18 -61.2(2)     | C15 C16 C18 C19 170.7(2) |
| C3 C4 C5 C6 53.7(3)        | C16 C3 C4 C5 -56.8(3)    |
| C3 C16 C18 C19 54.9(3)     | C16 C18 C19 N1 -68.2(3)  |
| C4 C3 C16 C15 56.8(2)      | C16 C18 C19 C20 59.1(3)  |
| C4 C3 C16 C17 -63.8(3)     | C16 C18 C19 C23 179.3(2) |
| C4 C3 C16 C18 172.87(19)   | C17 C16 C18 C19 -68.8(3) |
| C4 C5 C6 C7 -174.2(2)      | C18 C19 C20 O2 -119.8(3) |
| C4 C5 C6 C15 -52.8(3)      | C18 C19 C20 O3 61.9(3)   |
| C5 C6 C7 C8 -57.8(3)       | C18 C19 C23 C24 153.8(2) |
| C5 C6 C7 C11 178.93(19)    | C19 N1 C1 O1 179.4(2)    |
| C5 C6 C15 C14 -174.10(18)  | C19 N1 C1 C2 -2.2(3)     |
| C5 C6 C15 C16 56.2(2)      | C19 N1 C25 C24 -11.2(3)  |
| C6 C7 C8 C9 -163.8(2)      | C19 C23 C24 C25 -39.9(3) |
| C6 C7 C11 C10 -179.98(19)  | C20 O3 C21 C22 -145.6(3) |
| C6 C7 C11 C12 63.8(3)      | C20 C19 C23 C24 -82.9(3) |
| C6 C7 C11 C13 -59.2(2)     | C21 O3 C20 O2 0.2(4)     |
| C6 C15 C16 C3 -57.5(2)     | C21 O3 C20 C19 178.5(2)  |
| C6 C15 C16 C17 64.0(2)     | C23 C19 C20 O2 119.8(3)  |
| C6 C15 C16 C18 -175.10(17) | C23 C19 C20 O3 -58.5(3)  |
| C7 C6 C15 C14 -51.6(2)     | C23 C24 C25 N1 31.2(3)   |
| C7 C6 C15 C16 178.71(16)   | C25 N1 C1 O1 7.8(3)      |
| C7 C8 C9 C10 7.3(3)        | C25 N1 C1 C2 -173.9(2)   |
| C7 C11 C13 C14 56.2(2)     | C25 N1 C19 C18 -130.2(2) |
| C8 C7 C11 C10 48.3(2)      | C25 N1 C19 C20 100.8(2)  |
| C8 C7 C11 C12 -67.9(2)     | C25 N1 C19 C23 -13.4(2)  |

**Supplementary Table 11.** Hydrogen Atom Coordinates ( $\text{\AA} \times 10^4$ ) and Isotropic Displacement Parameters ( $\text{\AA}^2 \times 10^3$ ) for **4a**.

| Atom | <i>x</i> | <i>y</i> | <i>z</i> | U(eq) |
|------|----------|----------|----------|-------|
| H4   | 1188.8   | -2889.22 | 5460.84  | 120   |
| H2A  | 9541.53  | 5913.04  | 5895.46  | 78    |
| H2B  | 9218.59  | 5027.52  | 6324.17  | 78    |
| H3   | 8380.93  | 3608.36  | 5535.86  | 68    |
| H4A  | 6878.96  | 4755.74  | 5899.99  | 80    |
| H4B  | 7723.85  | 5248.68  | 5460.66  | 80    |
| H5A  | 6263.8   | 3209.3   | 5124.93  | 81    |

|      |          |          |         |     |
|------|----------|----------|---------|-----|
| H5B  | 5370.72  | 3791.77  | 5331.43 | 81  |
| H6   | 4733.48  | 2271.53  | 5912.41 | 62  |
| H7   | 4453.78  | 838.85   | 5134.06 | 65  |
| H8A  | 3306.62  | 1907.22  | 4935.6  | 93  |
| H8B  | 2633.02  | 1735.64  | 5404.59 | 93  |
| H9A  | 1686.51  | -172.64  | 4742.8  | 101 |
| H9B  | 911.35   | -255.54  | 5184.58 | 101 |
| H10  | 2643.96  | -1325.86 | 5009.39 | 75  |
| H12A | 2978.11  | 314.47   | 6212.8  | 99  |
| H12B | 1827.26  | -1221.11 | 6124.07 | 99  |
| H12C | 1721.53  | -2.4     | 5907.5  | 99  |
| H13A | 4462.71  | -1069.3  | 5474.5  | 64  |
| H13B | 3561.64  | -1753.04 | 5895.32 | 64  |
| H14A | 5854.91  | -210.68  | 6090.45 | 65  |
| H14B | 4858.84  | 248.67   | 6294.9  | 65  |
| H15  | 6474.02  | 1399.22  | 5540.34 | 57  |
| H17A | 6128.3   | 3200.44  | 6434.33 | 86  |
| H17B | 7553.25  | 3636.72  | 6658.88 | 86  |
| H17C | 6351.41  | 2094.17  | 6681.34 | 86  |
| H18A | 8327.67  | 1630.83  | 5900.62 | 69  |
| H18B | 7668.56  | 1189.72  | 6364.83 | 69  |
| H21A | 7970.06  | 2839.13  | 7590.48 | 111 |
| H21B | 9596.73  | 3643.62  | 7622.68 | 111 |
| H22A | 7900.9   | 807.99   | 7774.83 | 185 |
| H22B | 8716.12  | 1910.64  | 8140.28 | 185 |
| H22C | 9521.71  | 1568.1   | 7786.19 | 185 |
| H23A | 9923.4   | 1329.51  | 6710.4  | 92  |
| H23B | 9926.63  | 1177.75  | 6194.43 | 92  |
| H24A | 12085.69 | 3234.8   | 6711.04 | 102 |
| H24B | 12233.47 | 2296.49  | 6350.25 | 102 |
| H25A | 12716.23 | 4685.99  | 6144.07 | 92  |
| H25B | 12005.95 | 3473.15  | 5798.85 | 92  |

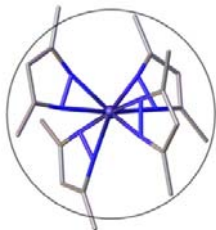

---

## MOLECULAR STRUCTURE LABORATORY

---

MICHAEL M. ARISTOV, ILIA A. GUZEI, PH.D.

---

University of Wisconsin-Madison  
2124 Chemistry Department  
1101 University Ave  
Madison, WI 53706

☎ 608-263-4694  
Fax 608-262-0381

E-mail: iguzei@chem.wisc.edu

---

# Structural report on S10

(CCDC 1888661)

MARCH 14, 2018

Crystallographic Experimental Section

### ***Data Collection***

A colorless needle crystal with approximate dimensions 0.20 x 0.25 x 0.58 mm<sup>3</sup> was selected under oil under ambient conditions and attached to the tip of a MiTeGen MicroMount©. The crystal was mounted in a stream of cold nitrogen at 100(1) K and centered in the X-ray beam by using a video camera.

The crystal evaluation and data collection were performed on a Bruker SMART APEXII diffractometer with Cu K<sub>α</sub> ( $\lambda = 1.54178 \text{ \AA}$ ) radiation and the diffractometer to crystal distance of 4.03 cm [12].

The initial cell constants were obtained from three series of  $\omega$  scans at different starting angles. Each series consisted of 35 frames collected at intervals of 0.7° in a 25° range about  $\omega$  with the exposure time of 3 seconds per frame. The reflections were successfully indexed by an

automated indexing routine built in the APEXII program. The final cell constants were calculated from a set of 9094 strong reflections from the actual data collection.

The data were collected by using the full sphere data collection routine to survey the reciprocal space to the extent of a full sphere to a resolution of 0.80 Å. A total of 31858 data were harvested by collecting 18 sets of frames with 0.6° scans in  $\omega$  and  $\varphi$  with an exposure time 4-10 sec per frame. These highly redundant datasets were corrected for Lorentz and polarization effects. The absorption correction was based on fitting a function to the empirical transmission surface as sampled by multiple equivalent measurements [13].

### Structure Solution and Refinement

The systematic absences in the diffraction data were uniquely consistent for the space group  $P2_12_12_1$  that yielded chemically reasonable and computationally stable results of refinement [14-19].

A successful solution by the direct methods provided most non-hydrogen atoms from the  $E$ -map. The remaining non-hydrogen atoms were located in an alternating series of least-squares cycles and difference Fourier maps. All non-hydrogen atoms were refined with anisotropic displacement coefficients. All hydrogen atoms were included in the structure factor calculation at idealized positions and were allowed to ride on the neighboring atoms with relative isotropic displacement coefficients.

The absolute structure was unequivocally established by anomalous scattering. A total of six stereocenter were found with C2, C6, C8, and C11 in the  $R$  conformation with C13 and C17 in the  $S$  conformation.

The final least-squares refinement of 220 parameters against 3497 data resulted in residuals  $R$  (based on  $F^2$  for  $I \geq 2\sigma$ ) and  $wR$  (based on  $F^2$  for all data) of 0.0299 and 0.0814, respectively. The final difference Fourier map was featureless.

### Summary

**Crystal Data** for  $C_{21}H_{32}O_3$  ( $M=332.46$  g/mol): orthorhombic, space group  $P2_12_12_1$  (no. 19),  $a = 8.2422(3)$  Å,  $b = 10.1792(5)$  Å,  $c = 20.8464(9)$  Å,  $V = 1748.99(13)$  Å<sup>3</sup>,  $Z = 4$ ,  $T = 99.97$  K,  $\mu(\text{CuK}\alpha) = 0.645$  mm<sup>-1</sup>,  $D_{\text{calc}} = 1.263$  g/cm<sup>3</sup>, 31740 reflections measured ( $8.482^\circ \leq 2\theta \leq$

146.748°), 3497 unique ( $R_{\text{int}} = 0.0198$ ,  $R_{\text{sigma}} = 0.0087$ ) which were used in all calculations. The final  $R_1$  was 0.0299 ( $I > 2\sigma(I)$ ) and  $wR_2$  was 0.0814 (all data).

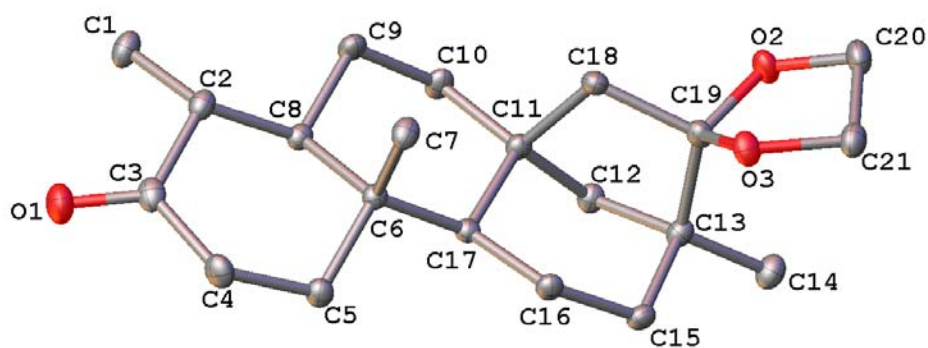

**Supplementary Figure 24.** A molecular drawing of **S10** shown with 50% probability ellipsoids.

All H atoms are omitted for clarity.

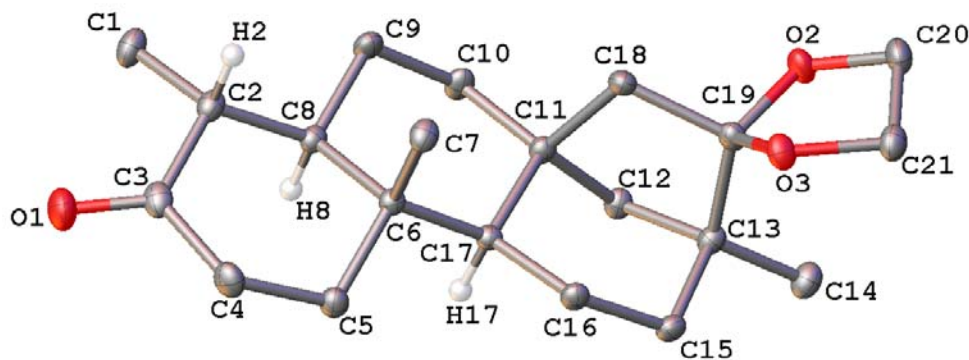

**Supplementary Figure 25.** A molecular drawing of **S10** shown with 50% probability ellipsoids.

All H atoms other than those around stereocenter are omitted for clarity.

**Supplementary Table 12.** Crystal data and structure refinement for **S10**.

|                     |                   |
|---------------------|-------------------|
| Identification code | tang26            |
| Empirical formula   | $C_{21}H_{32}O_3$ |
| Formula weight      | 332.46            |
| Temperature/K       | 99.97             |
| Crystal system      | orthorhombic      |
| Space group         | $P2_12_12_1$      |
| $a/\text{\AA}$      | 8.2422(3)         |
| $b/\text{\AA}$      | 10.1792(5)        |
| $c/\text{\AA}$      | 20.8464(9)        |
| $\alpha^\circ$      | 90                |



|                                               |                                                               |
|-----------------------------------------------|---------------------------------------------------------------|
| $\beta/^\circ$                                | 90                                                            |
| $\gamma/^\circ$                               | 90                                                            |
| Volume/ $\text{\AA}^3$                        | 1748.99(13)                                                   |
| Z                                             | 4                                                             |
| $\rho_{\text{calc}}/\text{g/cm}^3$            | 1.263                                                         |
| $\mu/\text{mm}^{-1}$                          | 0.645                                                         |
| F(000)                                        | 728.0                                                         |
| Crystal size/ $\text{mm}^3$                   | $0.585 \times 0.254 \times 0.202$                             |
| Radiation                                     | CuK $\alpha$ ( $\lambda = 1.54178$ )                          |
| $2\Theta$ range for data collection/ $^\circ$ | 8.482 to 146.748                                              |
| Index ranges                                  | $-10 \leq h \leq 10, -12 \leq k \leq 12, -25 \leq l \leq 25$  |
| Reflections collected                         | 31740                                                         |
| Independent reflections                       | 3497 [ $R_{\text{int}} = 0.0198, R_{\text{sigma}} = 0.0087$ ] |
| Data/restraints/parameters                    | 3497/0/220                                                    |
| Goodness-of-fit on $F^2$                      | 1.079                                                         |
| Final R indexes [ $I \geq 2\sigma(I)$ ]       | $R_1 = 0.0299, wR_2 = 0.0813$                                 |
| Final R indexes [all data]                    | $R_1 = 0.0300, wR_2 = 0.0814$                                 |
| Largest diff. peak/hole / $e \text{\AA}^{-3}$ | 0.26/-0.18                                                    |
| Flack parameter                               | 0.05(2)                                                       |

**Supplementary Table 13.** Fractional Atomic Coordinates ( $\times 10^4$ ) and Equivalent Isotropic Displacement Parameters ( $\text{\AA}^2 \times 10^3$ ) for **S10**.  $U_{\text{eq}}$  is defined as 1/3 of the trace of the orthogonalised  $U_{ij}$  tensor.

| Atom | x          | y           | z         | U(eq)   |
|------|------------|-------------|-----------|---------|
| O1   | 3194.4(16) | 11465.4(12) | 6650.0(6) | 28.1(3) |
| O2   | 8159.7(13) | 3028.4(10)  | 5567.2(5) | 19.7(2) |
| O3   | 9941.9(13) | 4742.3(10)  | 5572.6(5) | 18.0(2) |
| C1   | 1613.8(19) | 9353.4(16)  | 6110.9(8) | 20.6(3) |
| C2   | 3471.4(18) | 9397.3(14)  | 6107.3(7) | 15.6(3) |
| C3   | 4075.0(19) | 10560.1(15) | 6498.0(7) | 17.6(3) |
| C4   | 5863(2)    | 10594.2(14) | 6667.6(8) | 18.7(3) |
| C5   | 6614.0(18) | 9254.6(14)  | 6825.7(7) | 15.8(3) |
| C6   | 6149.8(17) | 8162.4(14)  | 6348.3(6) | 12.1(3) |
| C7   | 6835.4(18) | 8515.3(15)  | 5682.3(7) | 16.8(3) |
| C8   | 4261.3(18) | 8091.9(14)  | 6329.4(7) | 13.0(3) |
| C9   | 3672.9(18) | 6910.5(15)  | 5940.3(7) | 16.7(3) |
| C10  | 4291.6(18) | 5631.0(15)  | 6230.6(8) | 16.5(3) |

|     |            |            |           |         |
|-----|------------|------------|-----------|---------|
| C11 | 6142.1(17) | 5566.0(14) | 6296.9(7) | 13.1(3) |
| C12 | 6626.7(18) | 4381.2(14) | 6715.3(7) | 14.7(3) |
| C13 | 8449.1(17) | 4227.8(14) | 6590.0(7) | 14.2(3) |
| C14 | 9168.3(19) | 2968.9(15) | 6872.2(7) | 19.4(3) |
| C15 | 9308.4(17) | 5431.9(15) | 6879.6(7) | 15.6(3) |
| C16 | 8674.5(17) | 6755.9(14) | 6633.0(7) | 14.3(3) |
| C17 | 6811.1(17) | 6828.9(14) | 6616.5(7) | 11.9(3) |
| C18 | 7047.1(18) | 5233.1(14) | 5664.8(7) | 15.3(3) |
| C19 | 8461.0(18) | 4307.5(14) | 5842.2(7) | 14.9(3) |
| C20 | 9584(2)    | 2619.9(16) | 5231.3(8) | 21.4(3) |
| C21 | 10873(2)   | 3586.5(16) | 5444.1(8) | 19.7(3) |

**Supplementary Table 14.** Anisotropic Displacement Parameters ( $\text{\AA}^2 \times 10^3$ ) for **S10**. The Anisotropic displacement factor exponent takes the form:  $-2\pi^2[h^2a^{*2}U_{11}+2hka^*b^*U_{12}+\dots]$ .

| Atom | U <sub>11</sub> | U <sub>22</sub> | U <sub>33</sub> | U <sub>23</sub> | U <sub>13</sub> | U <sub>12</sub> |
|------|-----------------|-----------------|-----------------|-----------------|-----------------|-----------------|
| O1   | 27.8(6)         | 22.5(6)         | 34.0(7)         | -5.4(5)         | -0.2(5)         | 9.4(5)          |
| O2   | 18.3(5)         | 15.0(5)         | 25.7(6)         | -7.6(4)         | 0.7(4)          | 0.8(4)          |
| O3   | 17.5(5)         | 16.5(5)         | 20.1(5)         | -0.9(4)         | 5.5(4)          | 0.6(4)          |
| C1   | 14.6(7)         | 21.5(7)         | 25.8(8)         | 4.6(6)          | 1.1(6)          | 4.0(6)          |
| C2   | 14.1(7)         | 17.1(7)         | 15.6(6)         | 3.2(5)          | 1.3(5)          | 2.3(6)          |
| C3   | 21.1(7)         | 14.6(7)         | 17.1(7)         | 4.0(6)          | 3.5(6)          | 2.6(6)          |
| C4   | 20.8(7)         | 12.1(7)         | 23.1(7)         | -2.3(6)         | 1.3(6)          | -1.4(6)         |
| C5   | 14.3(7)         | 14.0(6)         | 19.3(7)         | -1.3(5)         | -0.7(5)         | -0.8(6)         |
| C6   | 11.3(6)         | 12.5(6)         | 12.5(6)         | 0.3(5)          | 0.7(5)          | -0.8(5)         |
| C7   | 15.6(7)         | 18.4(7)         | 16.4(7)         | 3.6(5)          | 3.0(6)          | 2.0(6)          |
| C8   | 11.6(6)         | 14.4(7)         | 12.9(6)         | 1.2(5)          | 0.5(5)          | 0.3(5)          |
| C9   | 12.6(6)         | 17.6(7)         | 19.8(7)         | -2.1(6)         | -4.6(5)         | 0.2(6)          |
| C10  | 11.5(6)         | 13.9(7)         | 24.2(7)         | -0.7(6)         | -2.5(6)         | -2.7(6)         |
| C11  | 11.0(6)         | 13.2(7)         | 15.1(6)         | -0.5(5)         | -0.9(5)         | -0.8(5)         |
| C12  | 13.1(7)         | 13.2(6)         | 18.0(7)         | 0.9(5)          | 0.6(5)          | -1.1(5)         |
| C13  | 12.3(6)         | 14.7(6)         | 15.8(7)         | 1.9(5)          | -0.7(5)         | -0.6(5)         |
| C14  | 17.8(7)         | 18.2(7)         | 22.2(7)         | 4.4(6)          | 0.4(6)          | 2.0(6)          |
| C15  | 13.0(6)         | 18.2(7)         | 15.6(6)         | -0.4(5)         | -3.2(5)         | 0.2(6)          |
| C16  | 11.8(6)         | 14.4(6)         | 16.8(6)         | -1.3(5)         | -1.7(5)         | -1.7(5)         |
| C17  | 12.3(6)         | 12.4(6)         | 11.1(6)         | 0.0(5)          | 0.2(5)          | -0.6(5)         |
| C18  | 16.5(7)         | 15.8(6)         | 13.6(7)         | -3.1(5)         | -2.4(5)         | 1.3(6)          |

|     |         |         |         |         |         |         |
|-----|---------|---------|---------|---------|---------|---------|
| C19 | 14.2(7) | 13.3(7) | 17.3(7) | -3.0(5) | -0.3(5) | -0.5(5) |
| C20 | 23.2(8) | 19.0(7) | 22.1(7) | -4.0(6) | 1.3(6)  | 7.2(6)  |
| C21 | 17.8(7) | 20.5(7) | 20.7(7) | 1.0(6)  | 3.1(6)  | 5.3(6)  |

**Supplementary Table 15. Bond Lengths for S10.**

| Atom | Atom | Length/Å   | Atom | Atom | Length/Å   |
|------|------|------------|------|------|------------|
| O1   | C3   | 1.215(2)   | C8   | C9   | 1.5294(19) |
| O2   | C19  | 1.4441(17) | C9   | C10  | 1.524(2)   |
| O2   | C20  | 1.4288(19) | C10  | C11  | 1.5329(19) |
| O3   | C19  | 1.4147(18) | C11  | C12  | 1.5411(19) |
| O3   | C21  | 1.4302(18) | C11  | C17  | 1.5494(18) |
| C1   | C2   | 1.532(2)   | C11  | C18  | 1.5516(19) |
| C2   | C3   | 1.521(2)   | C12  | C13  | 1.5326(19) |
| C2   | C8   | 1.5504(19) | C13  | C14  | 1.5296(19) |
| C3   | C4   | 1.516(2)   | C13  | C15  | 1.5388(19) |
| C4   | C5   | 1.533(2)   | C13  | C19  | 1.5610(19) |
| C5   | C6   | 1.5404(19) | C15  | C16  | 1.534(2)   |
| C6   | C7   | 1.5415(19) | C16  | C17  | 1.5380(18) |
| C6   | C8   | 1.5587(19) | C18  | C19  | 1.544(2)   |
| C6   | C17  | 1.5660(19) | C20  | C21  | 1.515(2)   |

**Supplementary Table 16. Bond Angles for S10.**

| Atom | Atom | Atom | Angle/°    | Atom | Atom | Atom | Angle/°    |
|------|------|------|------------|------|------|------|------------|
| C20  | O2   | C19  | 108.39(11) | C12  | C11  | C17  | 108.28(11) |
| C19  | O3   | C21  | 106.27(11) | C12  | C11  | C18  | 100.67(11) |
| C1   | C2   | C8   | 113.16(12) | C17  | C11  | C18  | 112.05(11) |
| C3   | C2   | C1   | 110.31(13) | C13  | C12  | C11  | 103.73(12) |
| C3   | C2   | C8   | 111.70(12) | C12  | C13  | C15  | 107.64(11) |
| O1   | C3   | C2   | 122.32(14) | C12  | C13  | C19  | 99.85(11)  |
| O1   | C3   | C4   | 120.17(14) | C14  | C13  | C12  | 113.55(12) |
| C4   | C3   | C2   | 117.44(13) | C14  | C13  | C15  | 109.76(12) |
| C3   | C4   | C5   | 114.98(13) | C14  | C13  | C19  | 115.16(12) |
| C4   | C5   | C6   | 113.74(12) | C15  | C13  | C19  | 110.33(12) |
| C5   | C6   | C7   | 108.83(12) | C16  | C15  | C13  | 114.30(11) |

|     |     |     |            |     |     |     |            |
|-----|-----|-----|------------|-----|-----|-----|------------|
| C5  | C6  | C8  | 107.31(11) | C15 | C16 | C17 | 112.95(12) |
| C5  | C6  | C17 | 107.97(11) | C11 | C17 | C6  | 116.22(11) |
| C7  | C6  | C8  | 110.73(12) | C16 | C17 | C6  | 113.42(11) |
| C7  | C6  | C17 | 113.33(11) | C16 | C17 | C11 | 108.96(11) |
| C8  | C6  | C17 | 108.46(11) | C19 | C18 | C11 | 107.03(11) |
| C2  | C8  | C6  | 112.79(12) | O2  | C19 | C13 | 110.39(12) |
| C9  | C8  | C2  | 112.48(11) | O2  | C19 | C18 | 108.99(11) |
| C9  | C8  | C6  | 111.49(12) | O3  | C19 | O2  | 105.83(11) |
| C10 | C9  | C8  | 110.81(12) | O3  | C19 | C13 | 114.73(12) |
| C9  | C10 | C11 | 113.93(12) | O3  | C19 | C18 | 111.42(12) |
| C10 | C11 | C12 | 110.04(12) | C18 | C19 | C13 | 105.44(11) |
| C10 | C11 | C17 | 110.92(12) | O2  | C20 | C21 | 104.12(12) |
| C10 | C11 | C18 | 114.28(12) | O3  | C21 | C20 | 102.28(12) |

**Supplementary Table 17.** Torsion Angles for **S10**.

| A  | B   | C   | D   | Angle/°     | A   | B   | C   | D   | Angle/°     |
|----|-----|-----|-----|-------------|-----|-----|-----|-----|-------------|
| O1 | C3  | C4  | C5  | 145.69(15)  | C11 | C12 | C13 | C19 | -47.65(13)  |
| O2 | C20 | C21 | O3  | -29.58(15)  | C11 | C18 | C19 | O2  | 113.19(13)  |
| C1 | C2  | C3  | O1  | -16.0(2)    | C11 | C18 | C19 | O3  | -130.39(12) |
| C1 | C2  | C3  | C4  | 167.10(13)  | C11 | C18 | C19 | C13 | -5.32(15)   |
| C1 | C2  | C8  | C6  | -177.88(12) | C12 | C11 | C17 | C6  | -167.64(12) |
| C1 | C2  | C8  | C9  | 54.98(16)   | C12 | C11 | C17 | C16 | 62.74(14)   |
| C2 | C3  | C4  | C5  | -37.34(19)  | C12 | C11 | C18 | C19 | -23.28(14)  |
| C2 | C8  | C9  | C10 | -172.17(12) | C12 | C13 | C15 | C16 | -55.58(15)  |
| C3 | C2  | C8  | C6  | -52.67(16)  | C12 | C13 | C19 | O2  | -85.73(13)  |
| C3 | C2  | C8  | C9  | -179.82(12) | C12 | C13 | C19 | O3  | 154.82(11)  |
| C3 | C4  | C5  | C6  | 45.78(18)   | C12 | C13 | C19 | C18 | 31.83(14)   |
| C4 | C5  | C6  | C7  | 63.78(16)   | C13 | C15 | C16 | C17 | 45.29(17)   |
| C4 | C5  | C6  | C8  | -56.09(16)  | C14 | C13 | C15 | C16 | -179.62(12) |
| C4 | C5  | C6  | C17 | -172.82(12) | C14 | C13 | C19 | O2  | 36.25(17)   |
| C5 | C6  | C8  | C2  | 60.26(14)   | C14 | C13 | C19 | O3  | -83.20(15)  |
| C5 | C6  | C8  | C9  | -172.07(11) | C14 | C13 | C19 | C18 | 153.81(12)  |
| C5 | C6  | C17 | C11 | 166.21(12)  | C15 | C13 | C19 | O2  | 161.16(11)  |
| C5 | C6  | C17 | C16 | -66.35(14)  | C15 | C13 | C19 | O3  | 41.71(16)   |
| C6 | C8  | C9  | C10 | 60.00(15)   | C15 | C13 | C19 | C18 | -81.27(14)  |
| C7 | C6  | C8  | C2  | -58.39(15)  | C15 | C16 | C17 | C6  | -178.45(11) |

C7 C6 C8 C9 69.28(15) C15 C16 C17 C11 -47.31(15)  
 C7 C6 C17 C11 -73.17(15) C17 C6 C8 C2 176.67(11)  
 C7 C6 C17 C16 54.28(15) C17 C6 C8 C9 -55.66(14)  
 C8 C2 C3 O1 -142.78(14) C17 C11 C12 C13 -73.27(13)  
 C8 C2 C3 C4 40.32(17) C17 C11 C18 C19 91.60(13)  
 C8 C6 C17 C11 50.22(14) C18 C11 C12 C13 44.40(13)  
 C8 C6 C17 C16 177.67(11) C18 C11 C17 C6 82.23(14)  
 C8 C9 C10 C11 -56.35(16) C18 C11 C17 C16 -47.38(15)  
 C9 C10 C11 C12 168.45(12) C19 O2 C20 C21 12.17(16)  
 C9 C10 C11 C17 48.65(16) C19 O3 C21 C20 36.73(14)  
 C9 C10 C11 C18 -79.18(16) C19 C13 C15 C16 52.43(16)  
 C10 C11 C12 C13 165.34(12) C20 O2 C19 O3 10.15(15)  
 C10 C11 C17 C6 -46.80(15) C20 O2 C19 C13 -114.55(13)  
 C10 C11 C17 C16 -176.41(12) C20 O2 C19 C18 130.09(13)  
 C10 C11 C18 C19 -141.15(12) C21 O3 C19 O2 -29.95(14)  
 C11 C12 C13 C14 -170.77(12) C21 O3 C19 C13 92.01(14)  
 C11 C12 C13 C15 67.52(14) C21 O3 C19 C18 -148.28(12)

**Supplementary Table 18.** Hydrogen Atom Coordinates ( $\text{\AA} \times 10^4$ ) and Isotropic Displacement Parameters ( $\text{\AA}^2 \times 10^3$ ) for **S10**.

| Atom | x       | y        | z       | U(eq) |
|------|---------|----------|---------|-------|
| H1A  | 1233.55 | 9046.89  | 6530.42 | 31    |
| H1B  | 1234.82 | 8750.27  | 5776.53 | 31    |
| H1C  | 1184.53 | 10235.07 | 6028.08 | 31    |
| H2   | 3817.43 | 9547.84  | 5653.42 | 19    |
| H4A  | 6011.33 | 11181.4  | 7041.57 | 22    |
| H4B  | 6465.17 | 10982.69 | 6303.15 | 22    |
| H5A  | 6263.85 | 8988.71  | 7261.04 | 19    |
| H5B  | 7809.9  | 9344.69  | 6831.86 | 19    |
| H7A  | 8023.32 | 8485.72  | 5695.7  | 25    |
| H7B  | 6480.95 | 9401.34  | 5563.21 | 25    |
| H7C  | 6437.65 | 7883.18  | 5364.47 | 25    |
| H8   | 3895.34 | 7943.01  | 6780.95 | 16    |
| H9A  | 2472.04 | 6901.51  | 5932.12 | 20    |
| H9B  | 4064.08 | 6988.3   | 5492.93 | 20    |
| H10A | 3925.81 | 4890.33  | 5958.91 | 20    |

|      |          |         |         |    |
|------|----------|---------|---------|----|
| H10B | 3798.64  | 5517.18 | 6660.1  | 20 |
| H12A | 6411.96  | 4558.03 | 7174.52 | 18 |
| H12B | 6027.34  | 3581.76 | 6584.96 | 18 |
| H14A | 8847.53  | 2889.83 | 7323.25 | 29 |
| H14B | 10354.13 | 3001.69 | 6842.08 | 29 |
| H14C | 8763.87  | 2208.73 | 6632.14 | 29 |
| H15A | 9181.69  | 5406.14 | 7351.65 | 19 |
| H15B | 10482.25 | 5370.7  | 6783.48 | 19 |
| H16A | 9099.88  | 6907.83 | 6195.16 | 17 |
| H16B | 9092.55  | 7465.69 | 6912.52 | 17 |
| H17  | 6452.14  | 6789.95 | 7074.36 | 14 |
| H18A | 6303.28  | 4795.6  | 5359.17 | 18 |
| H18B | 7467.32  | 6044.81 | 5462.8  | 18 |
| H20A | 9417.12  | 2664.78 | 4761.51 | 26 |
| H20B | 9887.2   | 1710.62 | 5349.67 | 26 |
| H21A | 11440.49 | 3274.59 | 5834.01 | 24 |
| H21B | 11679.36 | 3743.04 | 5100.41 | 24 |

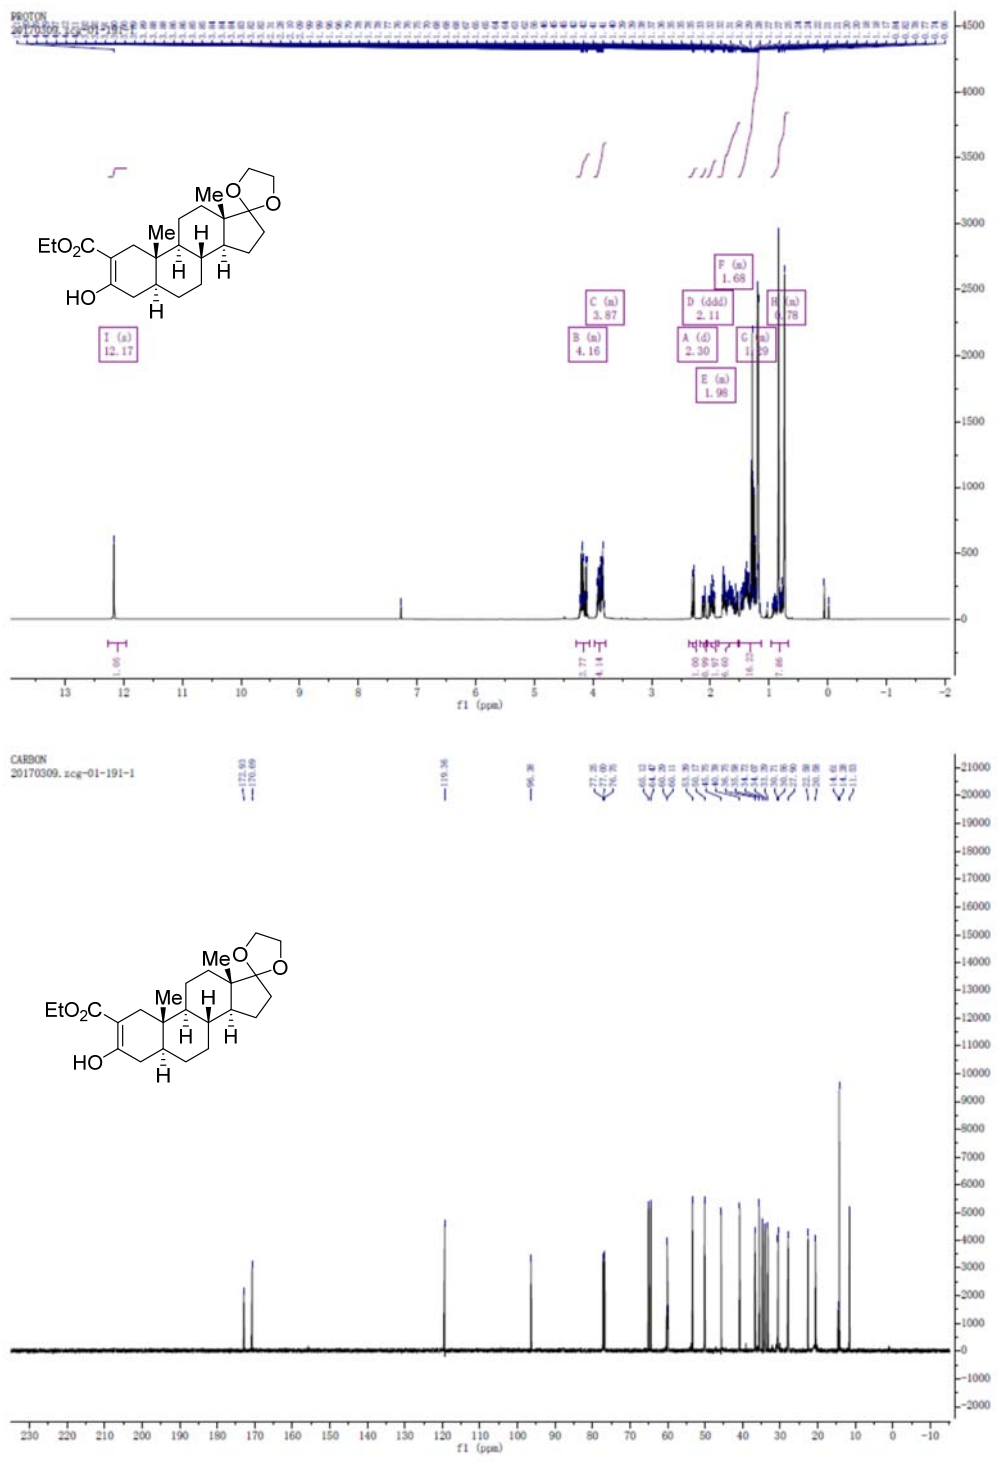

Supplementary Figure 26. <sup>1</sup>H and <sup>13</sup>C spectra of 2a.

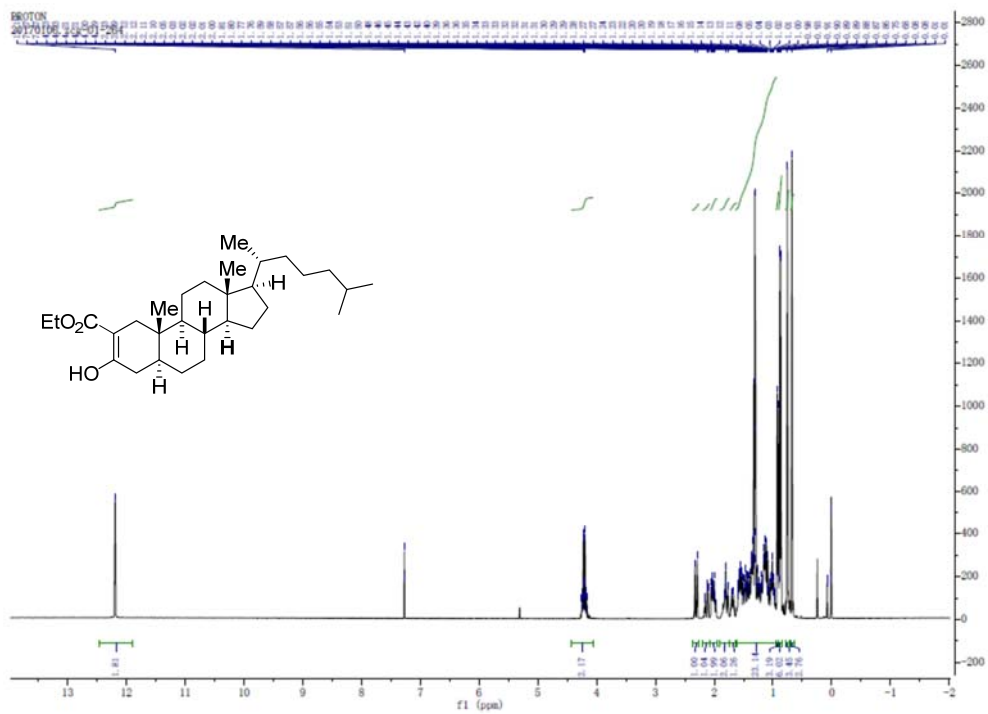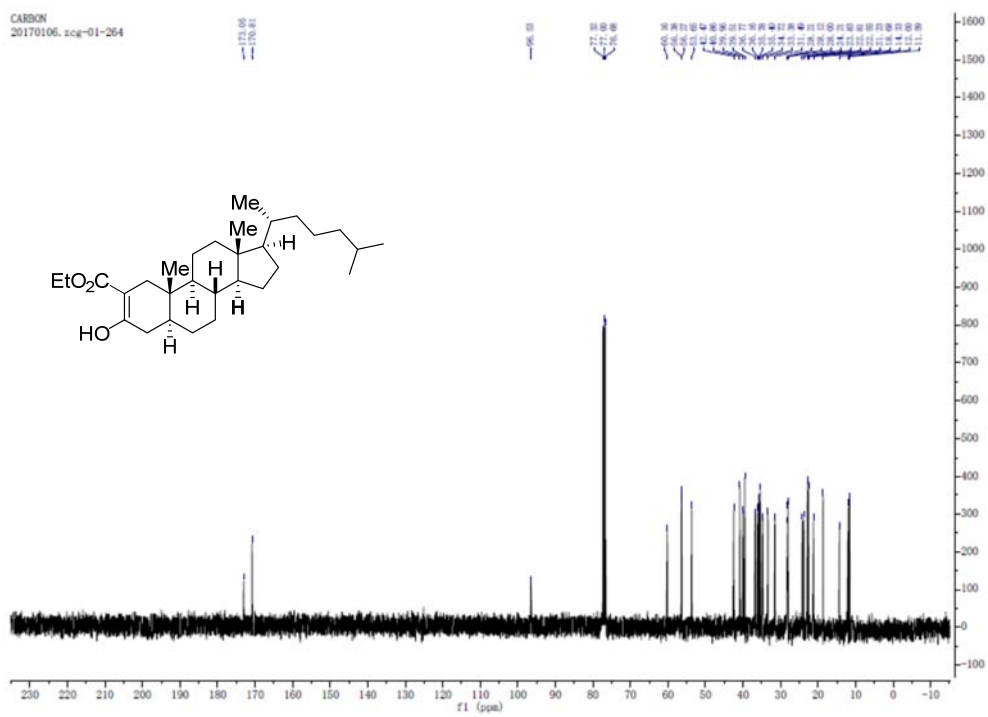

Supplementary Figure 27. <sup>1</sup>H and <sup>13</sup>C spectra of 2b.



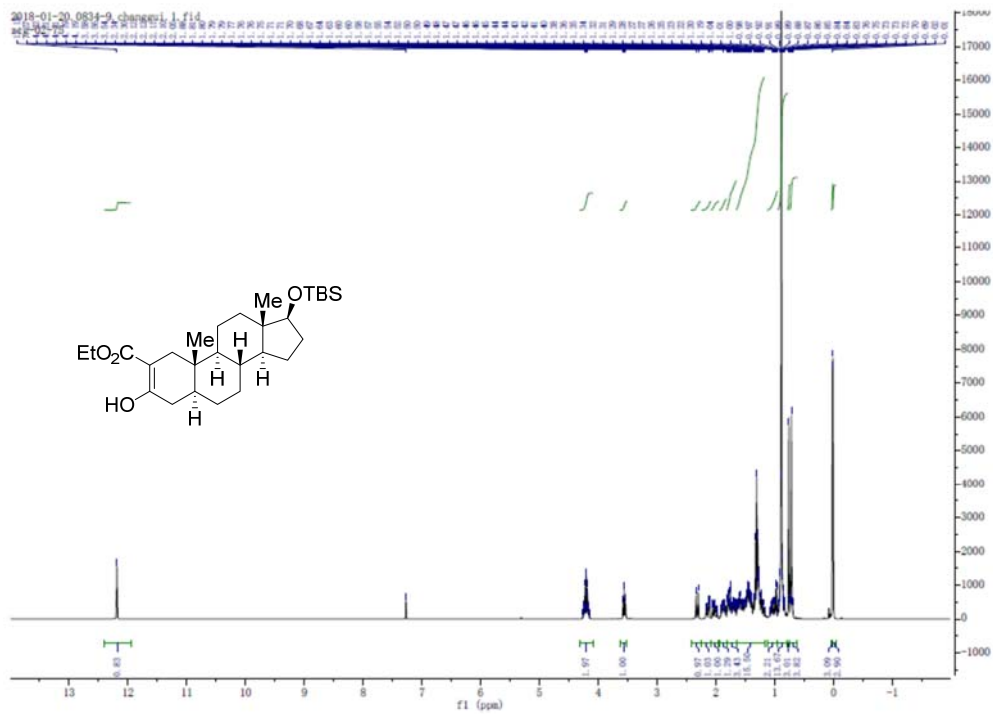

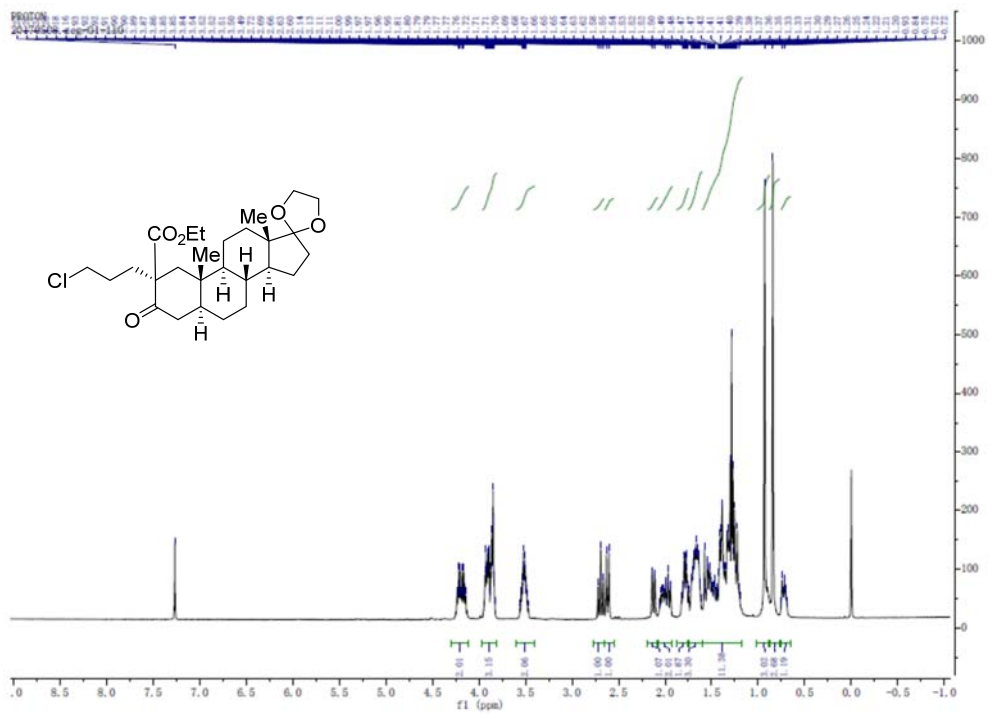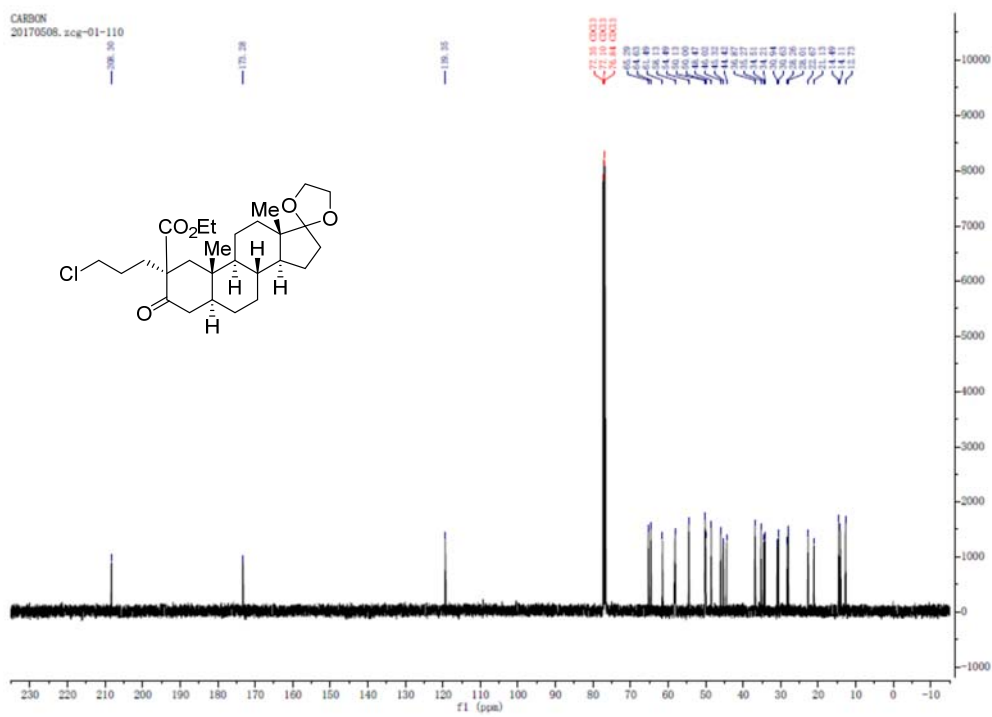

Supplementary Figure 29.  $^1\text{H}$  and  $^{13}\text{C}$  spectra of S2a.

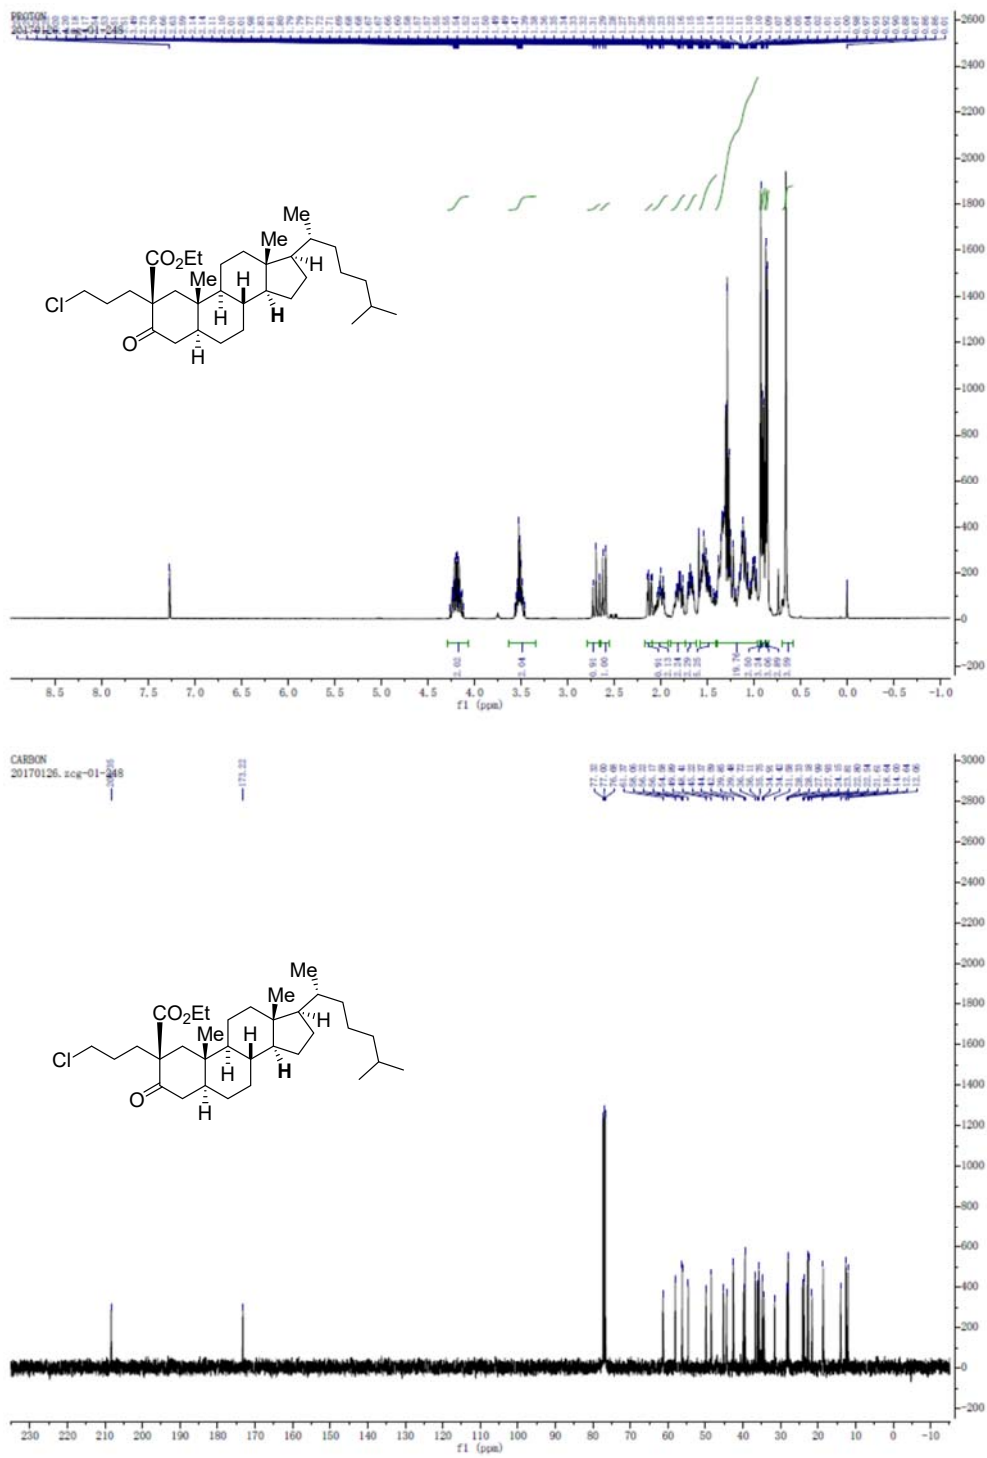

Supplementary Figure 30. <sup>1</sup>H and <sup>13</sup>C spectra of S2b.

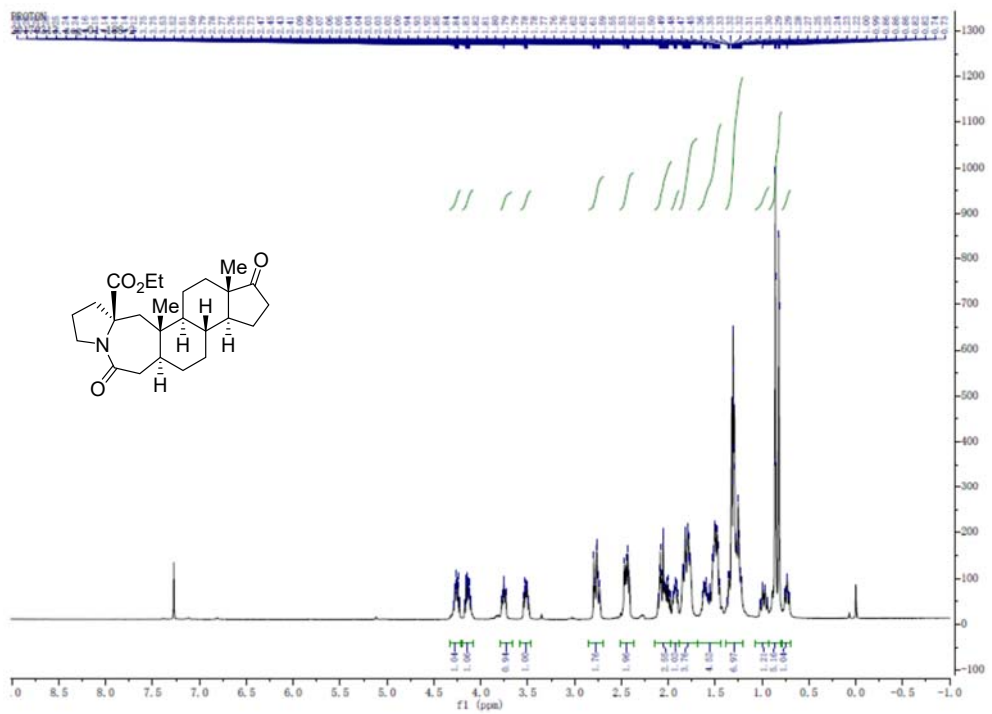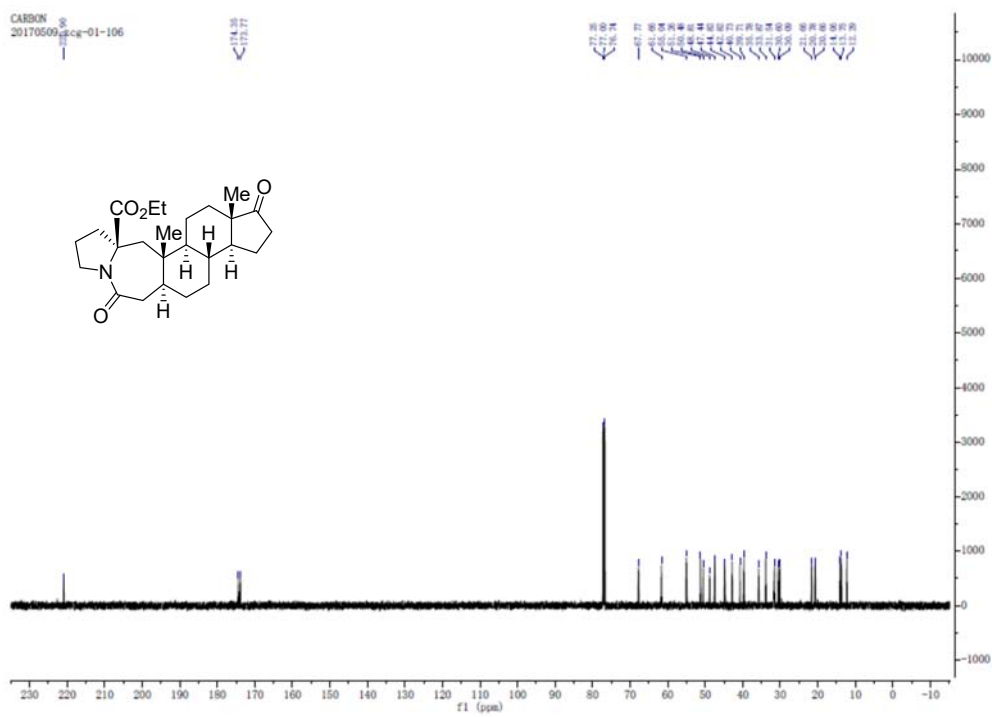

Supplementary Figure 31. <sup>1</sup>H and <sup>13</sup>C spectra of 3a.

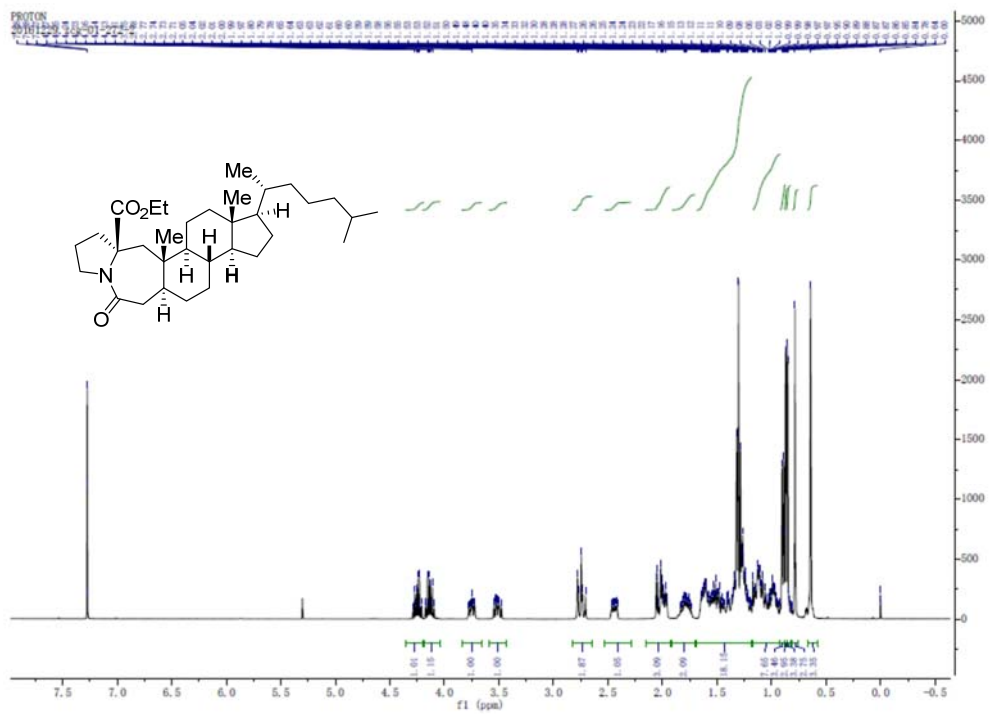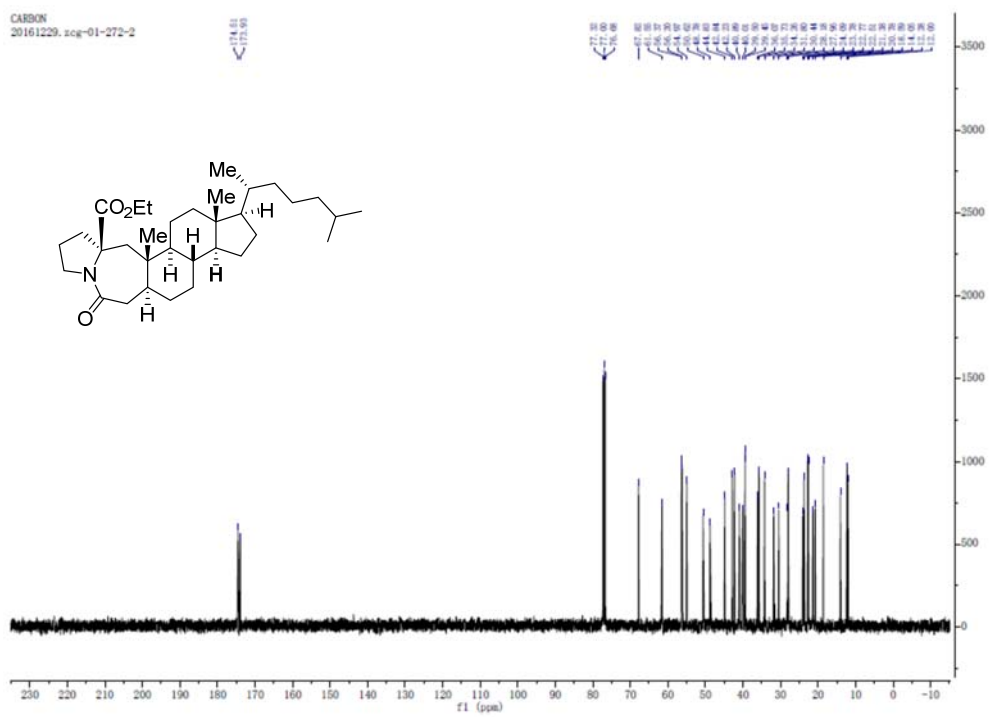

Supplementary Figure 32.  $^1\text{H}$  and  $^{13}\text{C}$  spectra of 3b.

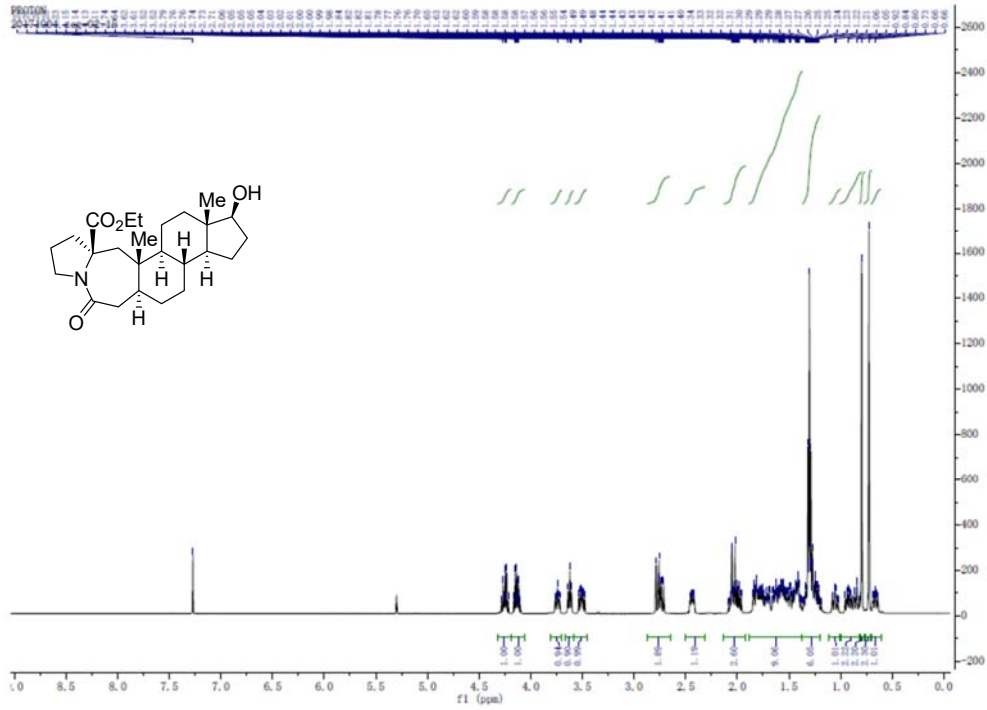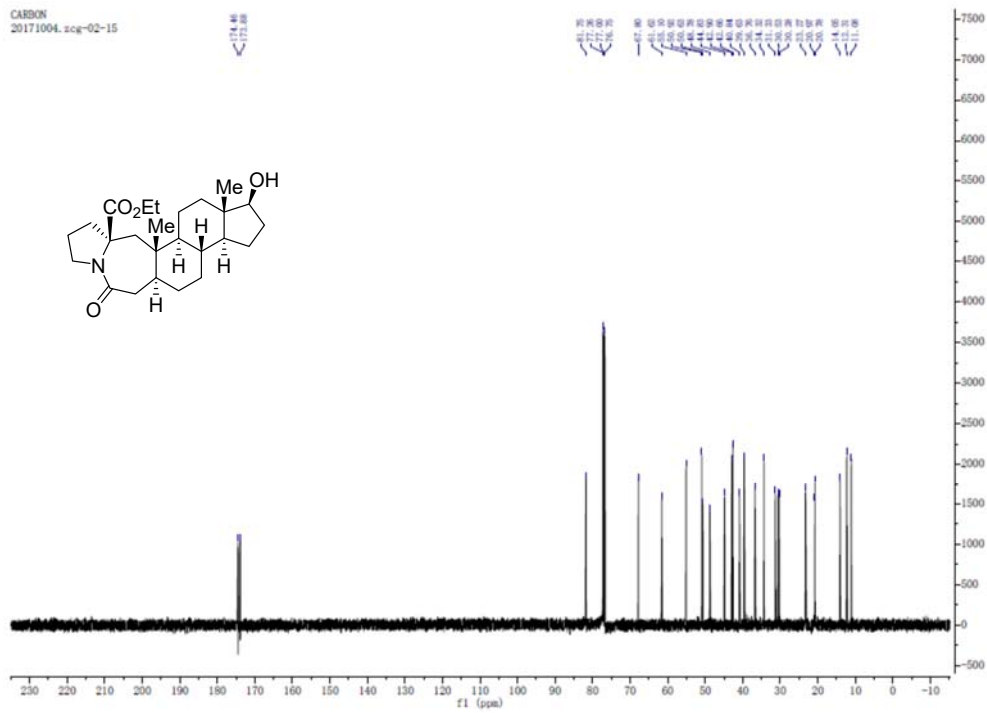

Supplementary Figure 33. <sup>1</sup>H and <sup>13</sup>C spectra of **4a**.

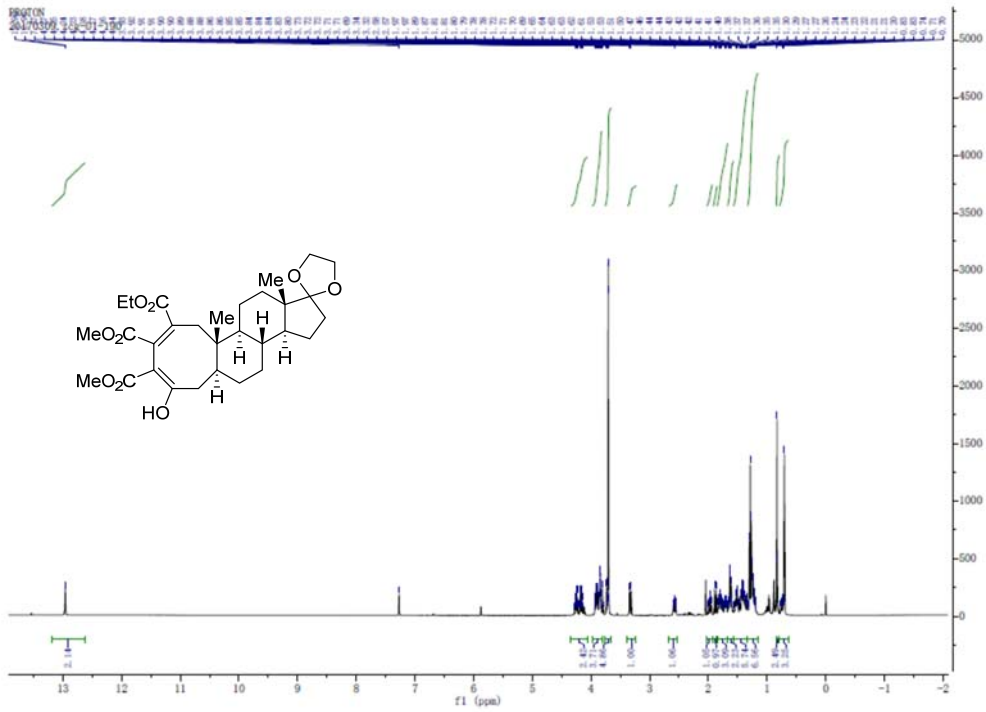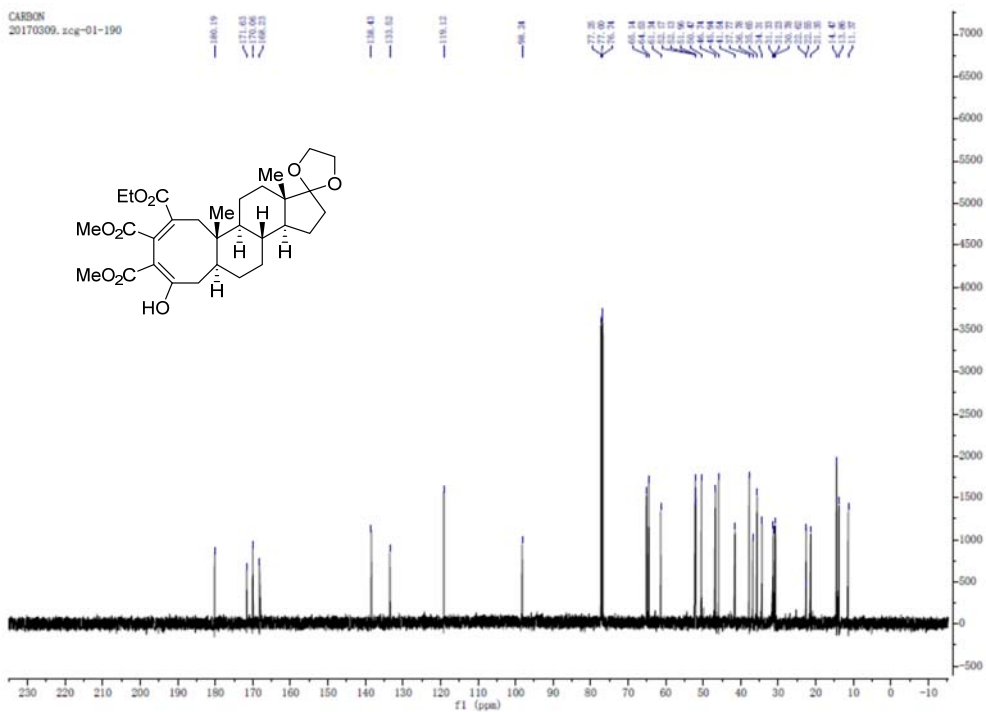

Supplementary Figure 34. <sup>1</sup>H and <sup>13</sup>C spectra of 5a.

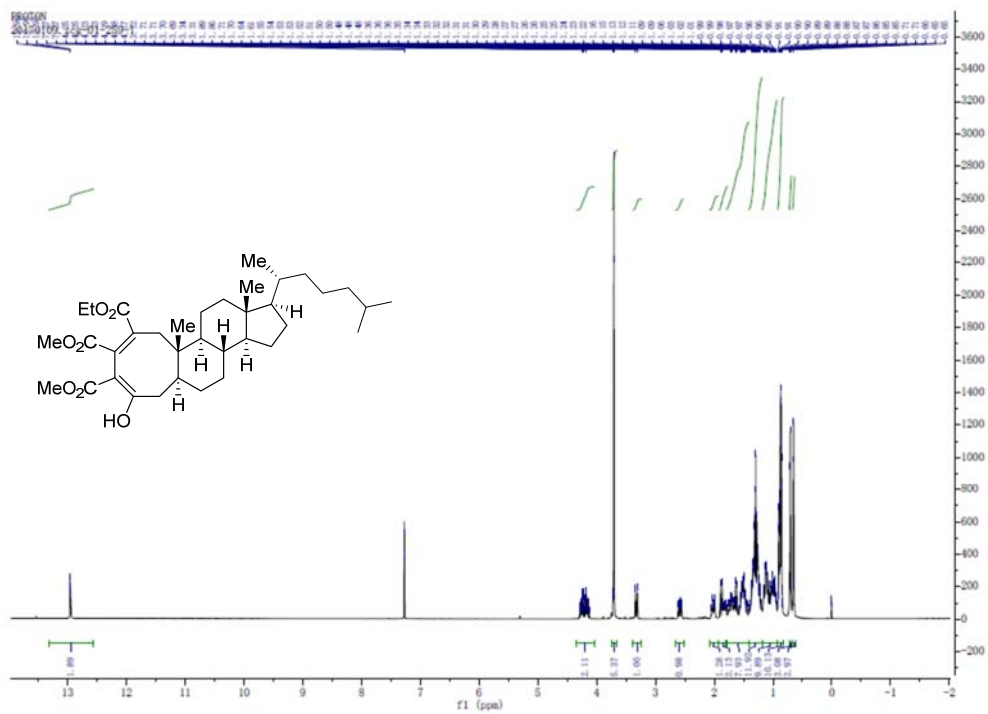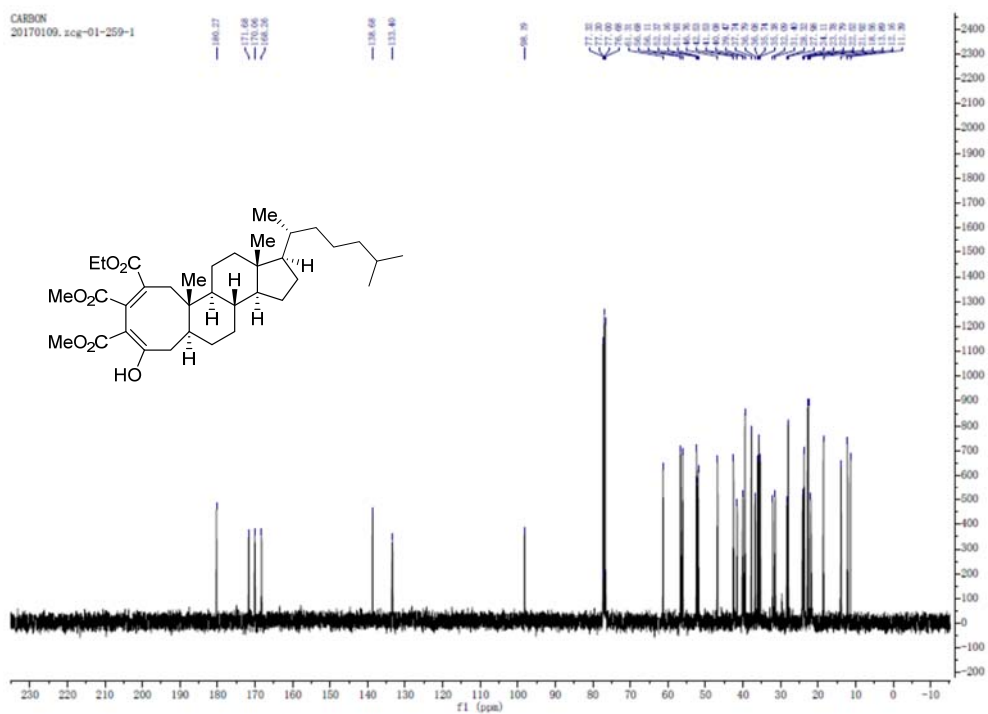

Supplementary Figure 35. <sup>1</sup>H and <sup>13</sup>C spectra of 5b.



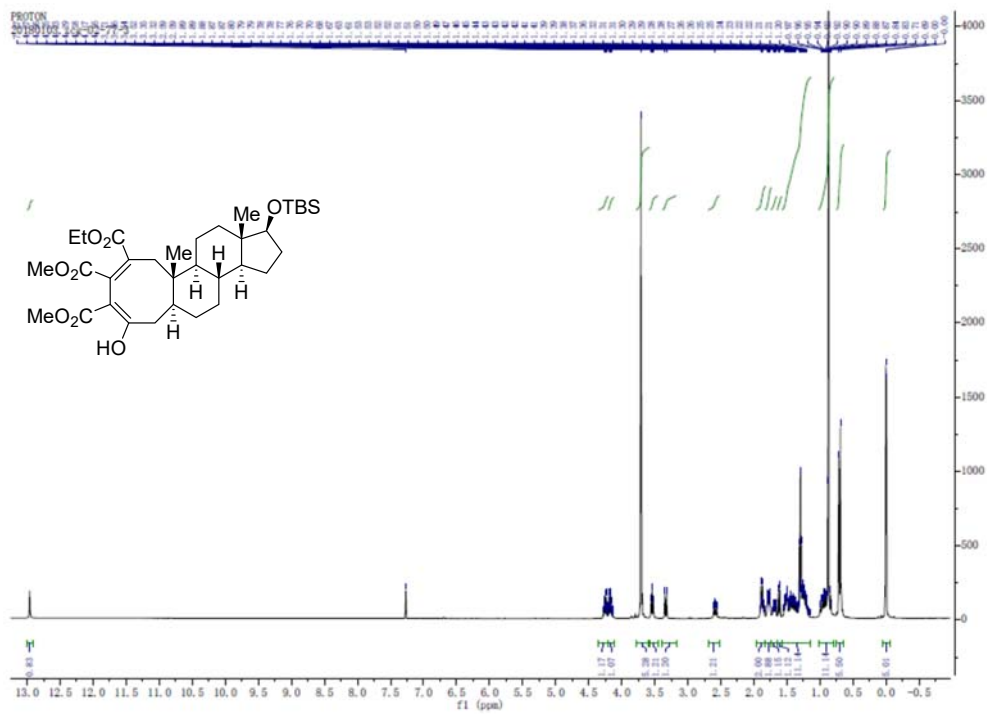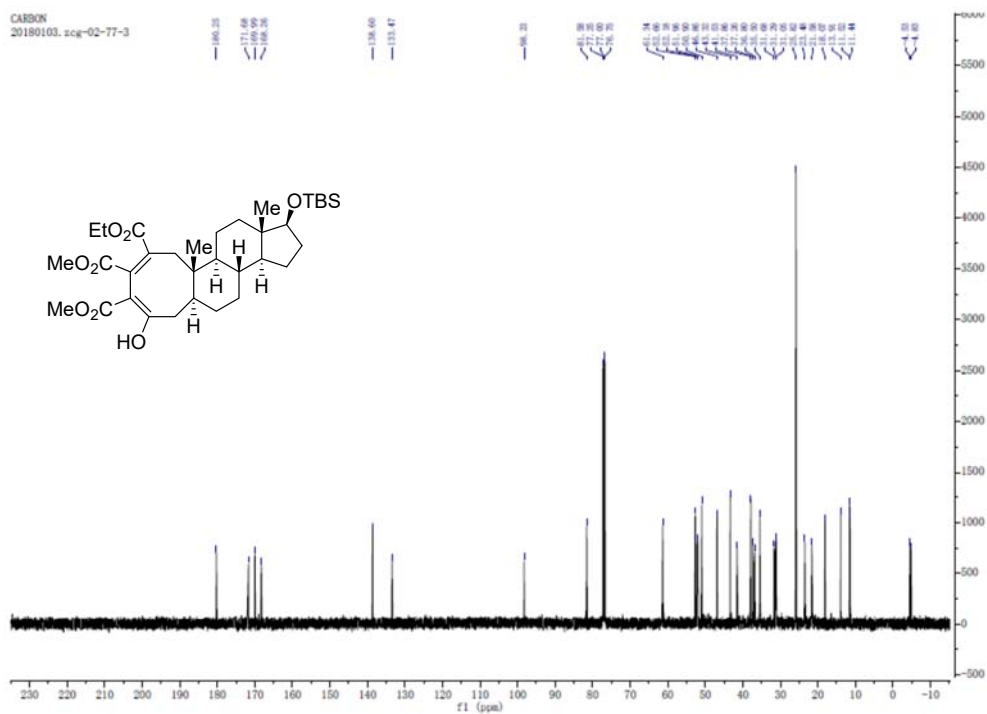

Supplementary Figure 36. <sup>1</sup>H and <sup>13</sup>C spectra of **5c**.

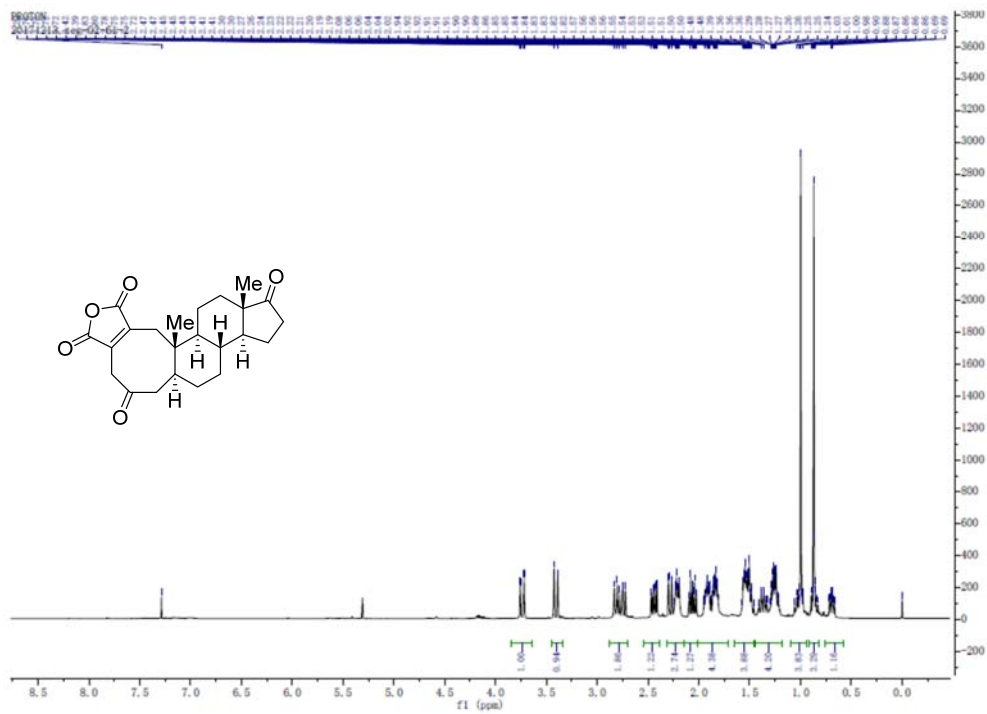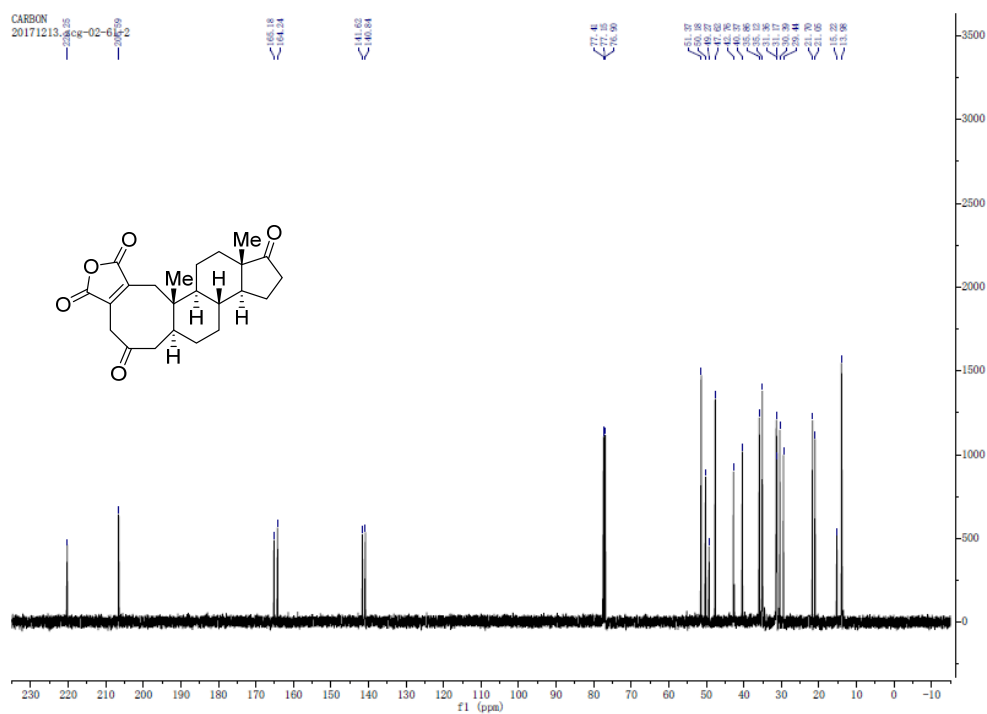

Supplementary Figure 37.  $^1\text{H}$  and  $^{13}\text{C}$  spectra of 6a.

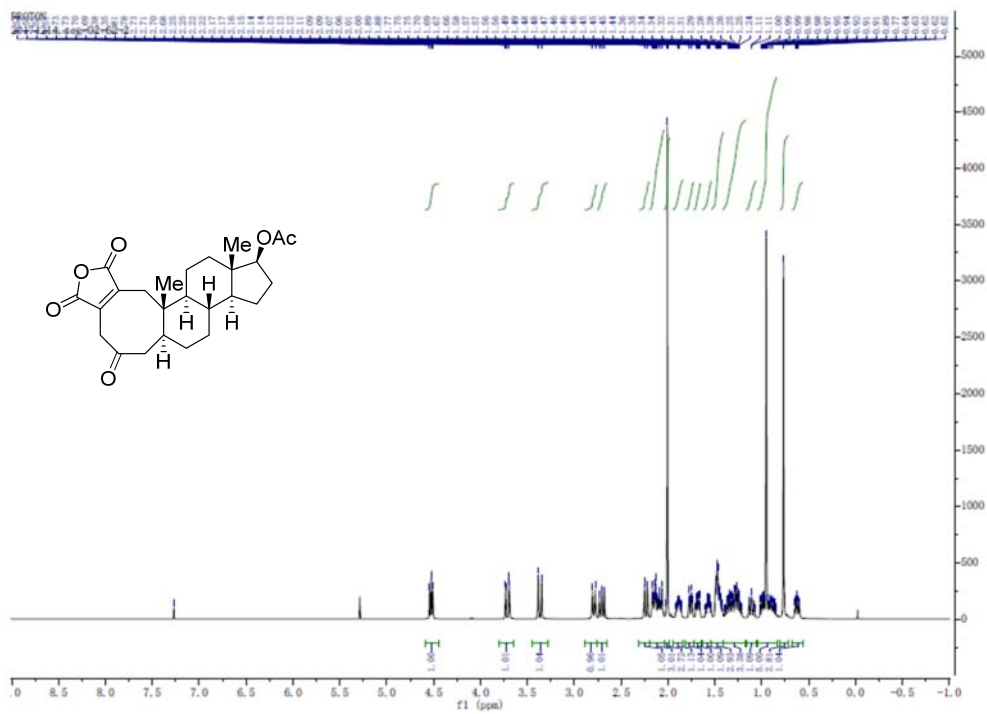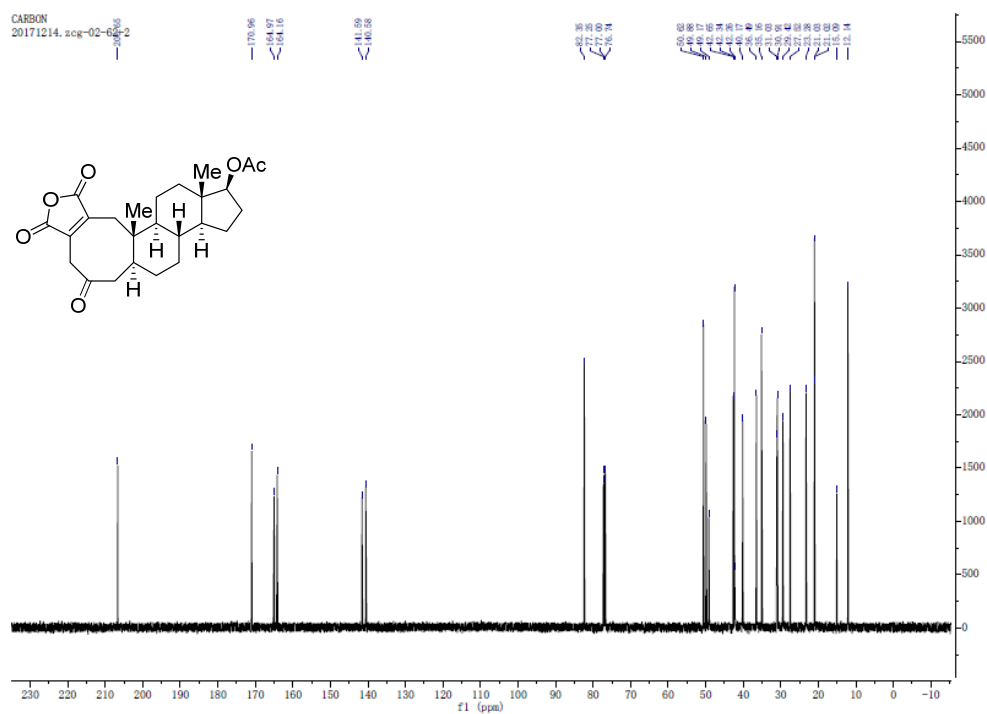

Supplementary Figure 38. <sup>1</sup>H and <sup>13</sup>C spectra of 6c.

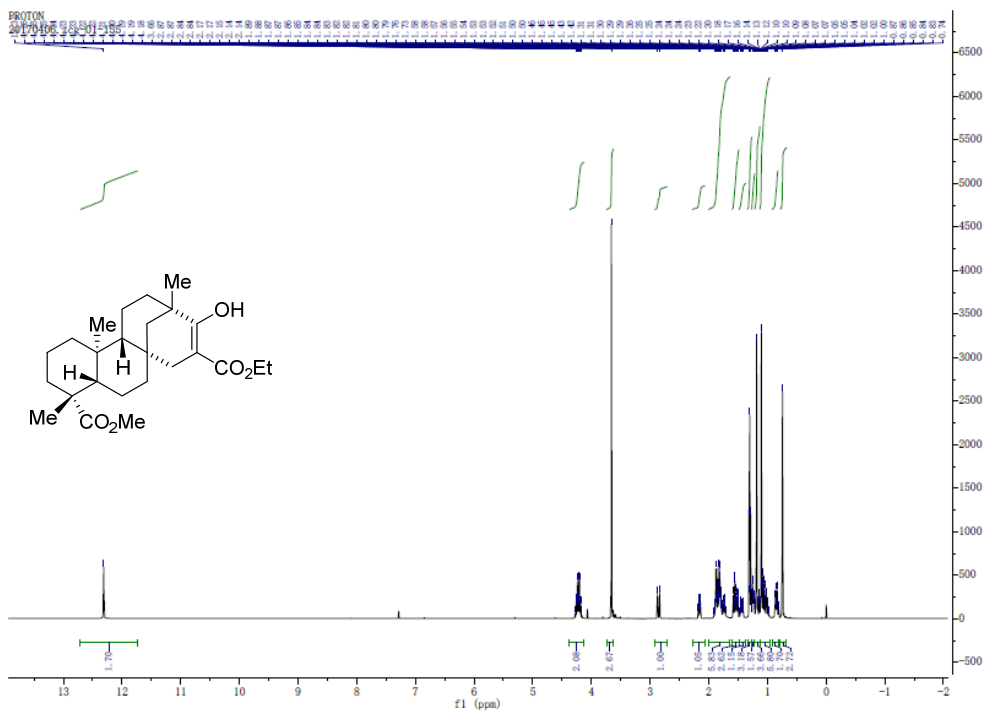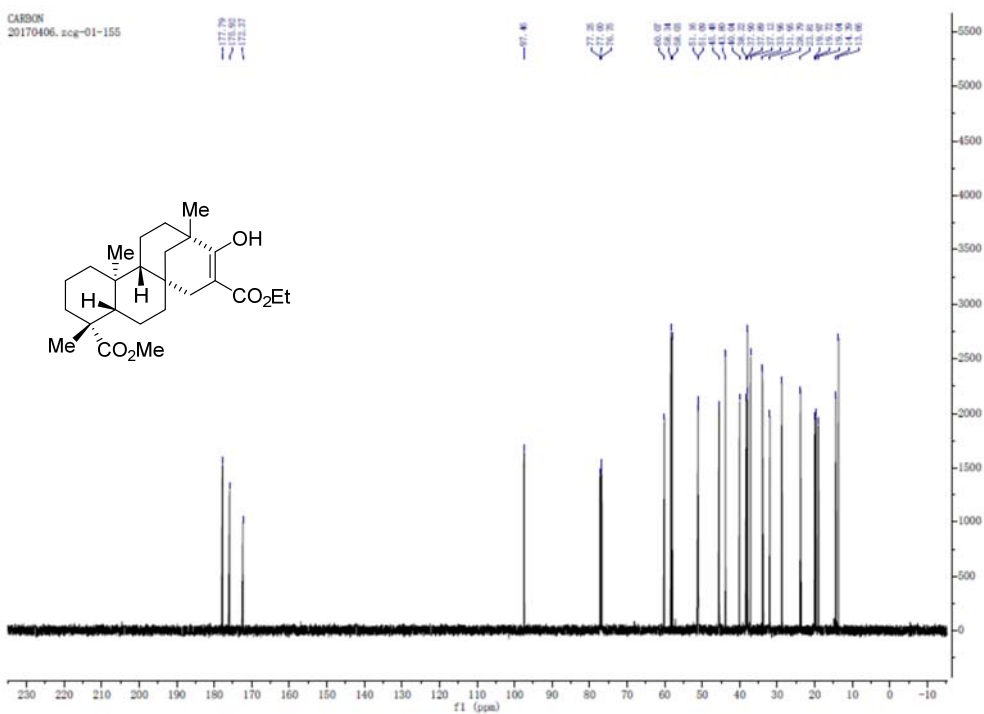

Supplementary Figure 39.  $^1\text{H}$  and  $^{13}\text{C}$  spectra of 7.

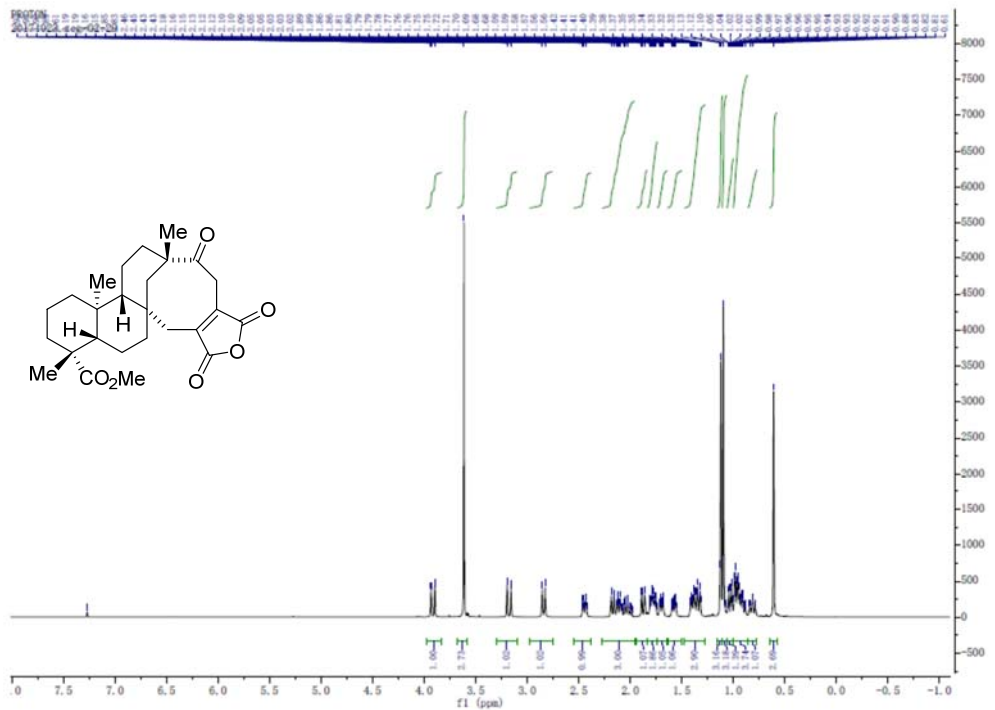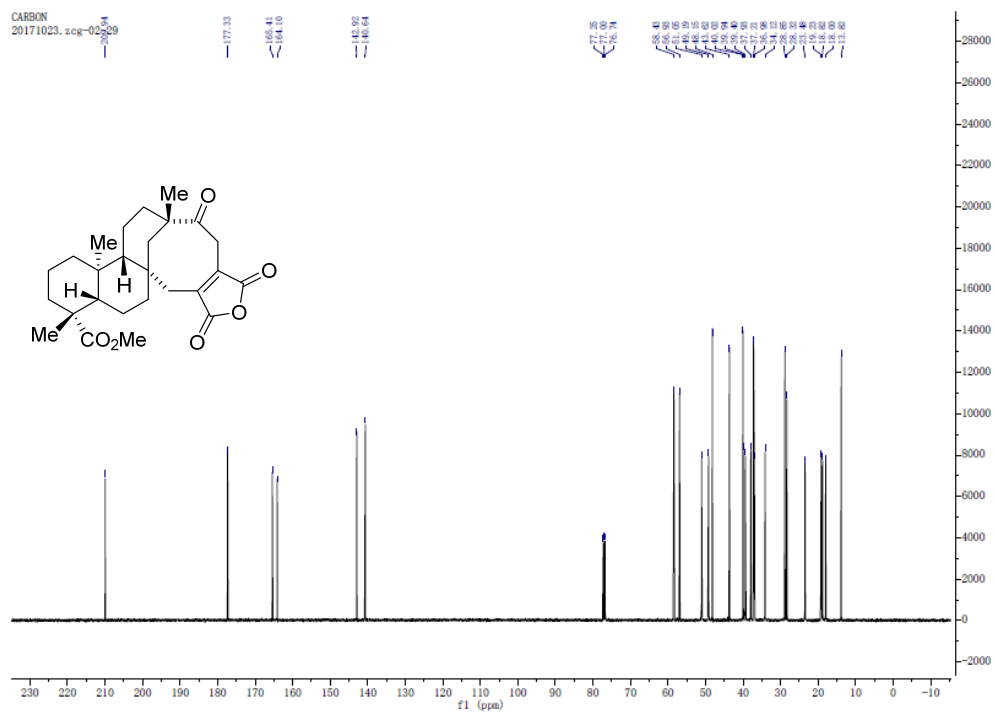

Supplementary Figure 40.  $^1\text{H}$  and  $^{13}\text{C}$  spectra of 8.

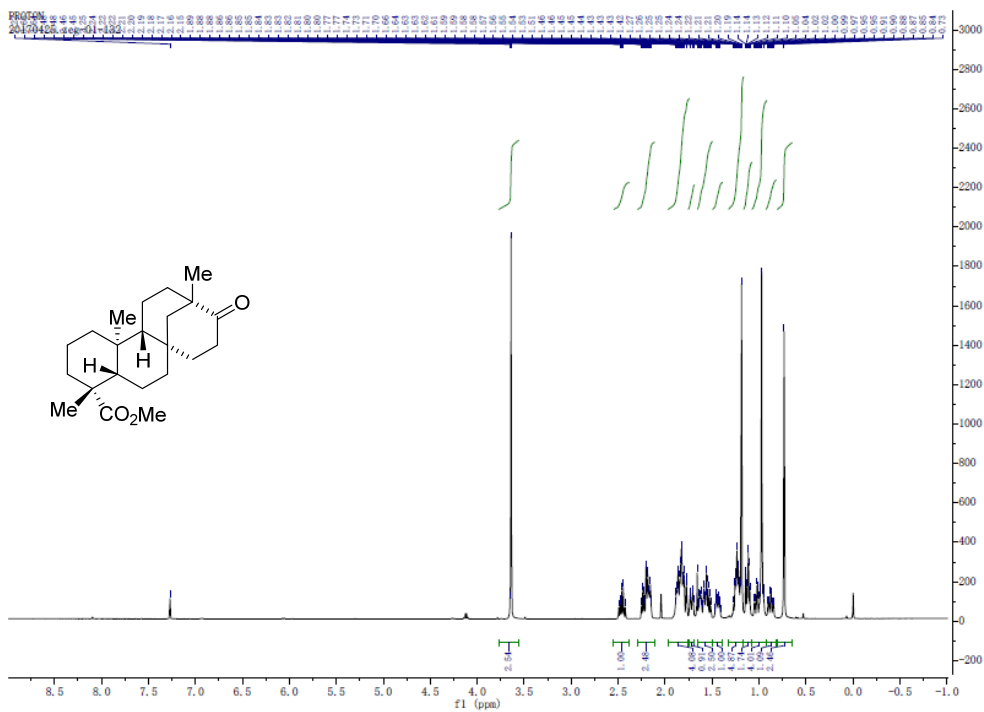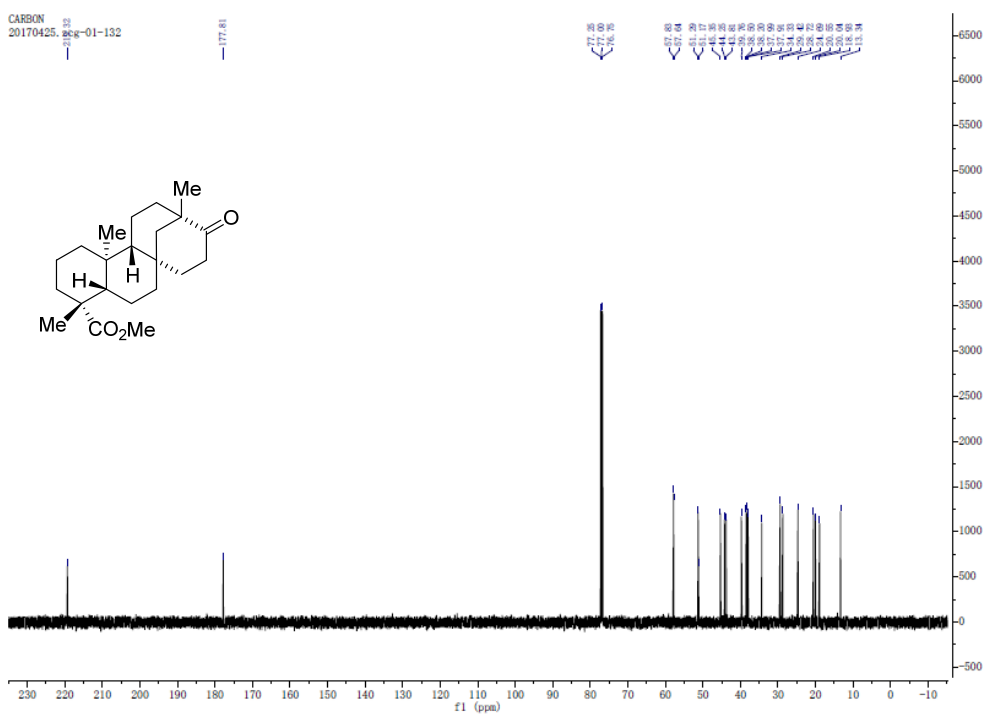

Supplementary Figure 41. <sup>1</sup>H and <sup>13</sup>C spectra of S4.

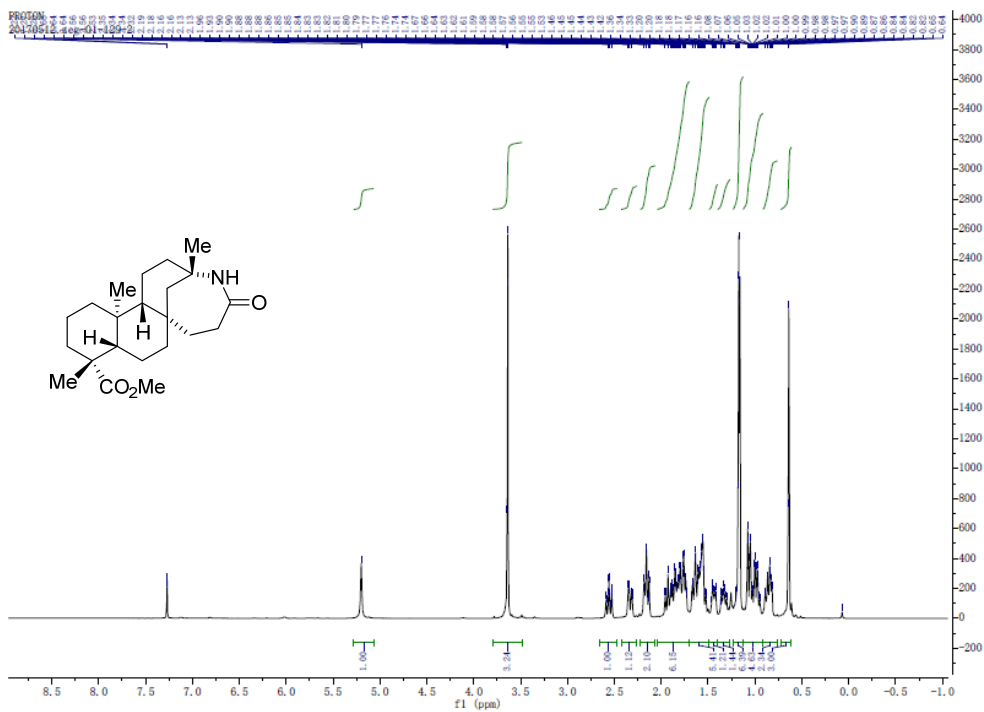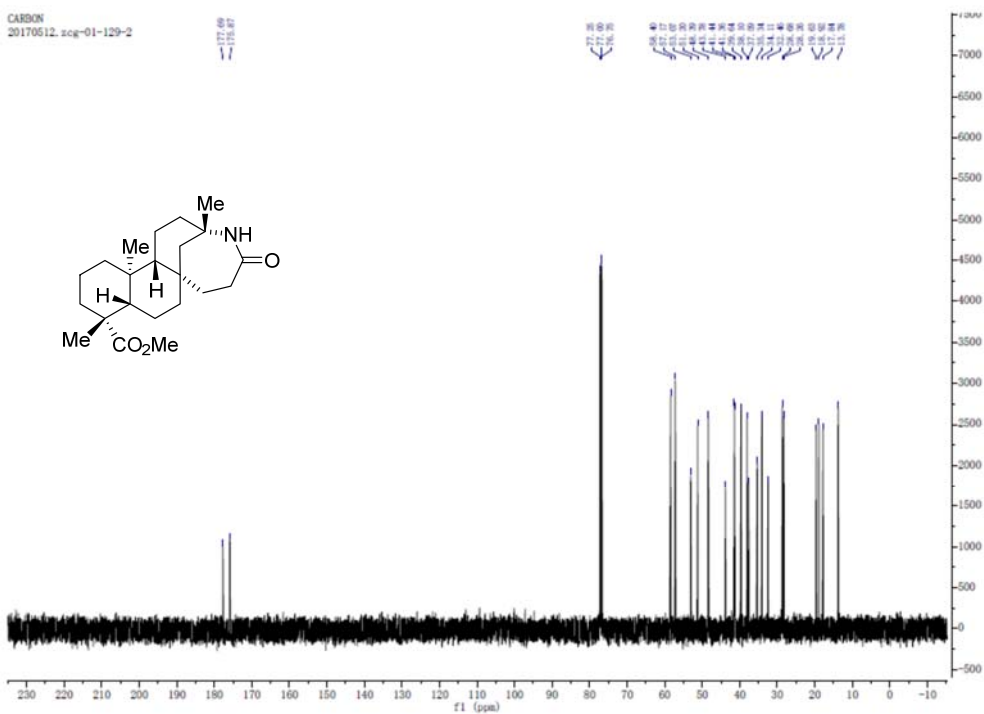

Supplementary Figure 42.  $^1\text{H}$  and  $^{13}\text{C}$  spectra of 9.

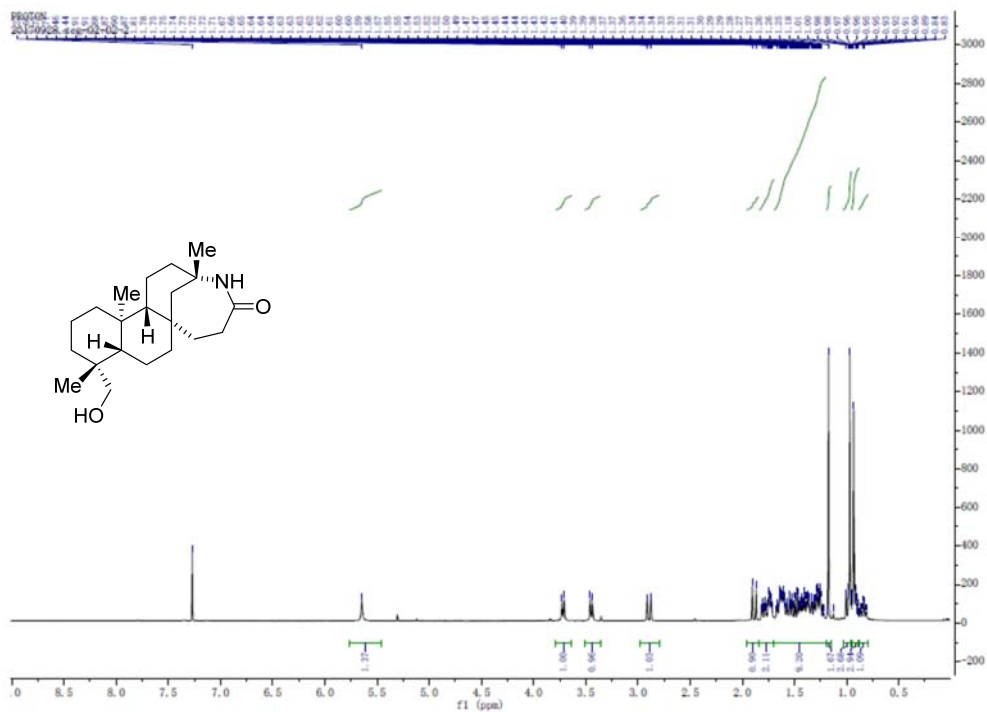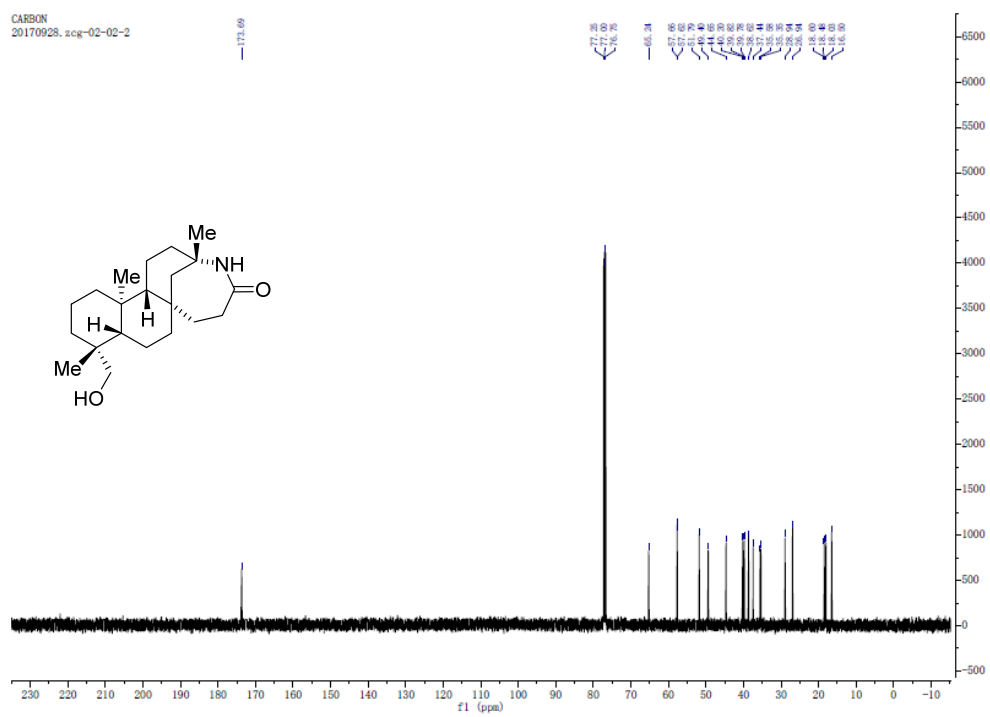

Supplementary Figure 43.  $^1\text{H}$  and  $^{13}\text{C}$  spectra of 10.



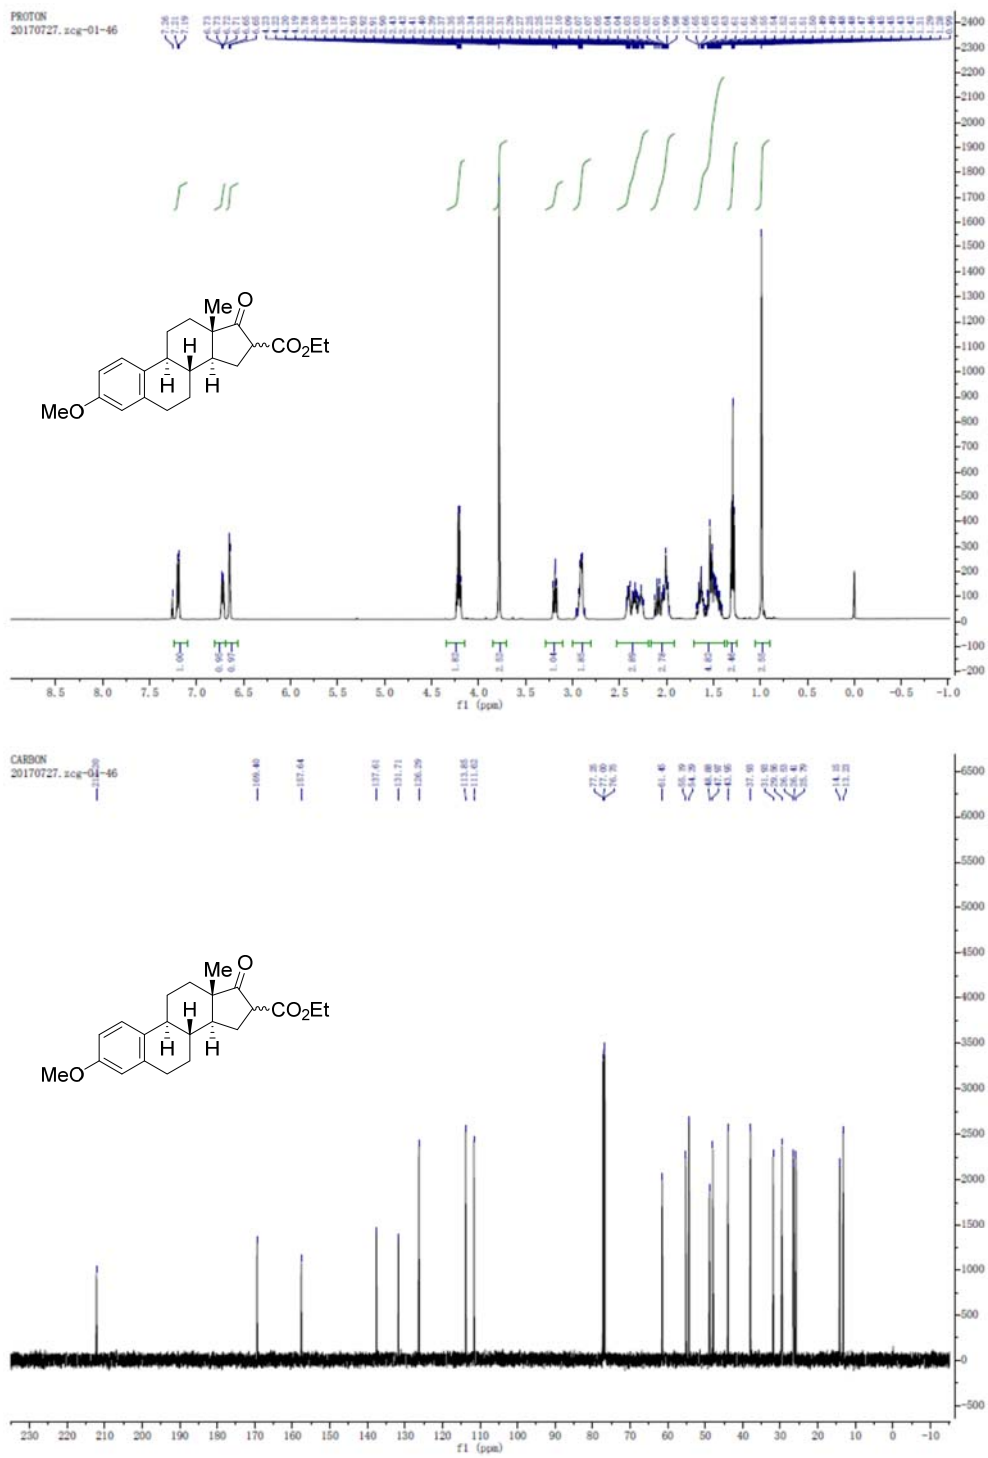

Supplementary Figure 44. <sup>1</sup>H and <sup>13</sup>C spectra of 11.

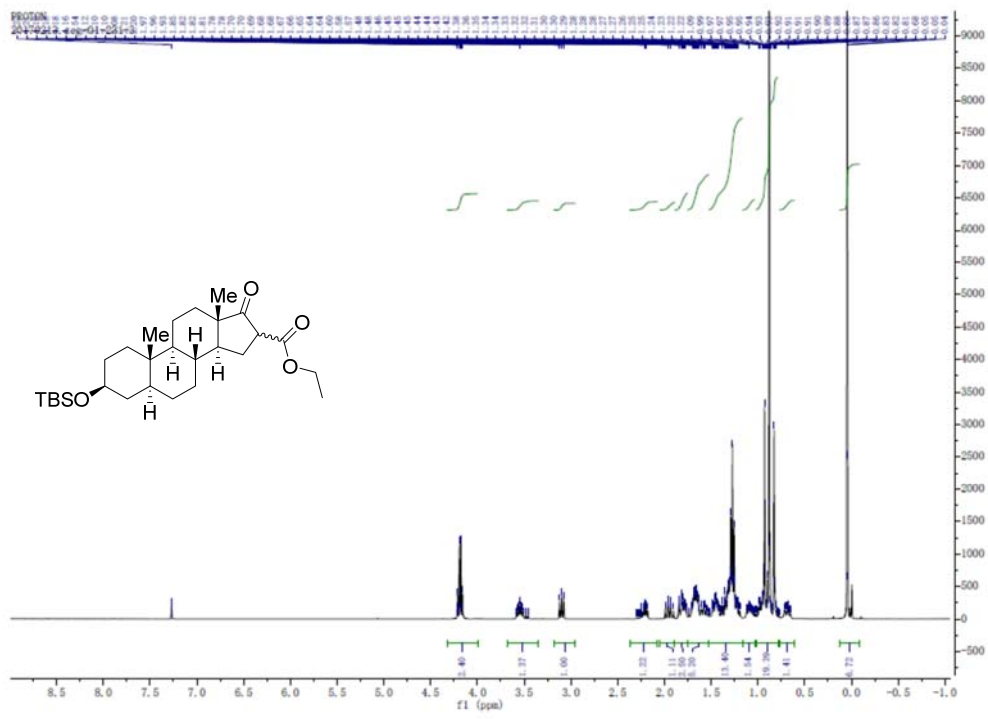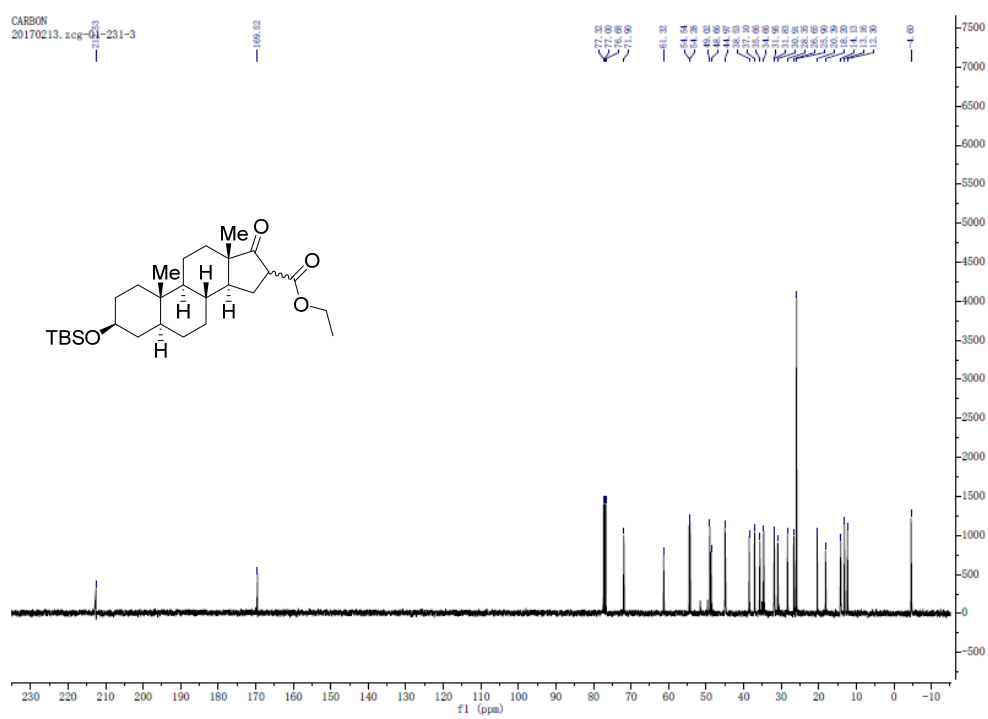

Supplementary Figure 45.  $^1\text{H}$  and  $^{13}\text{C}$  spectra of 13.

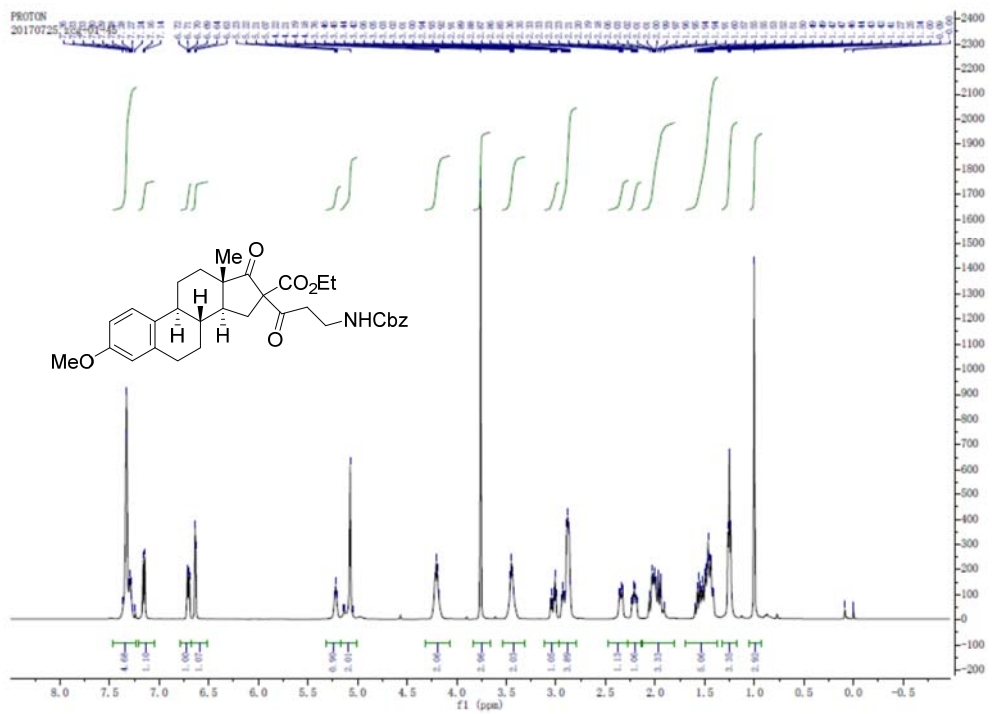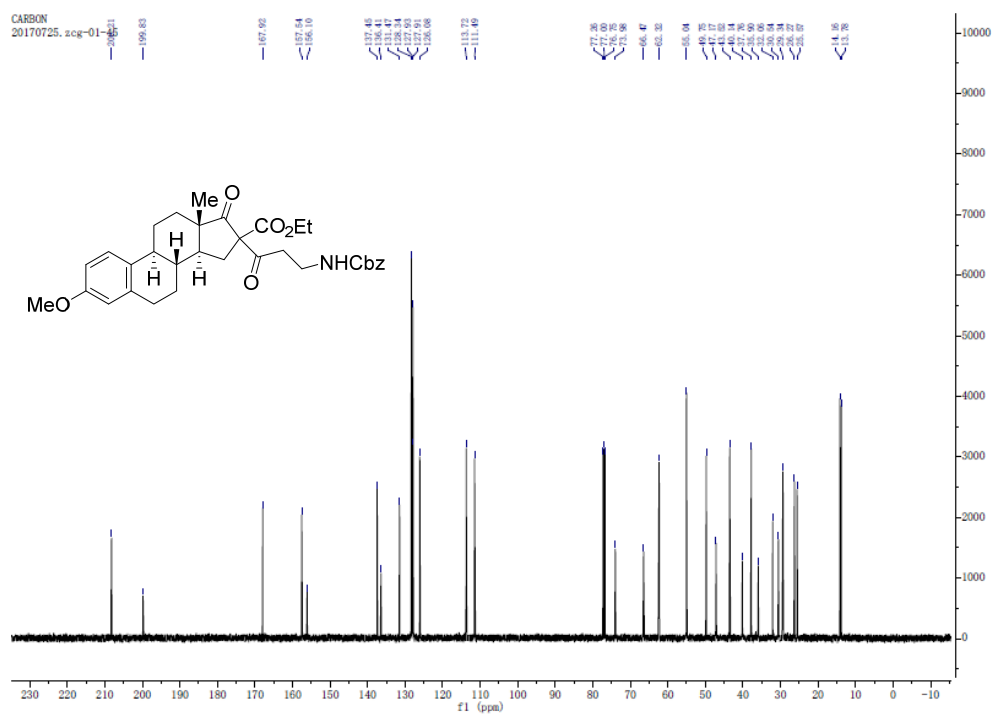

Supplementary Figure 46. <sup>1</sup>H and <sup>13</sup>C spectra of S6a.



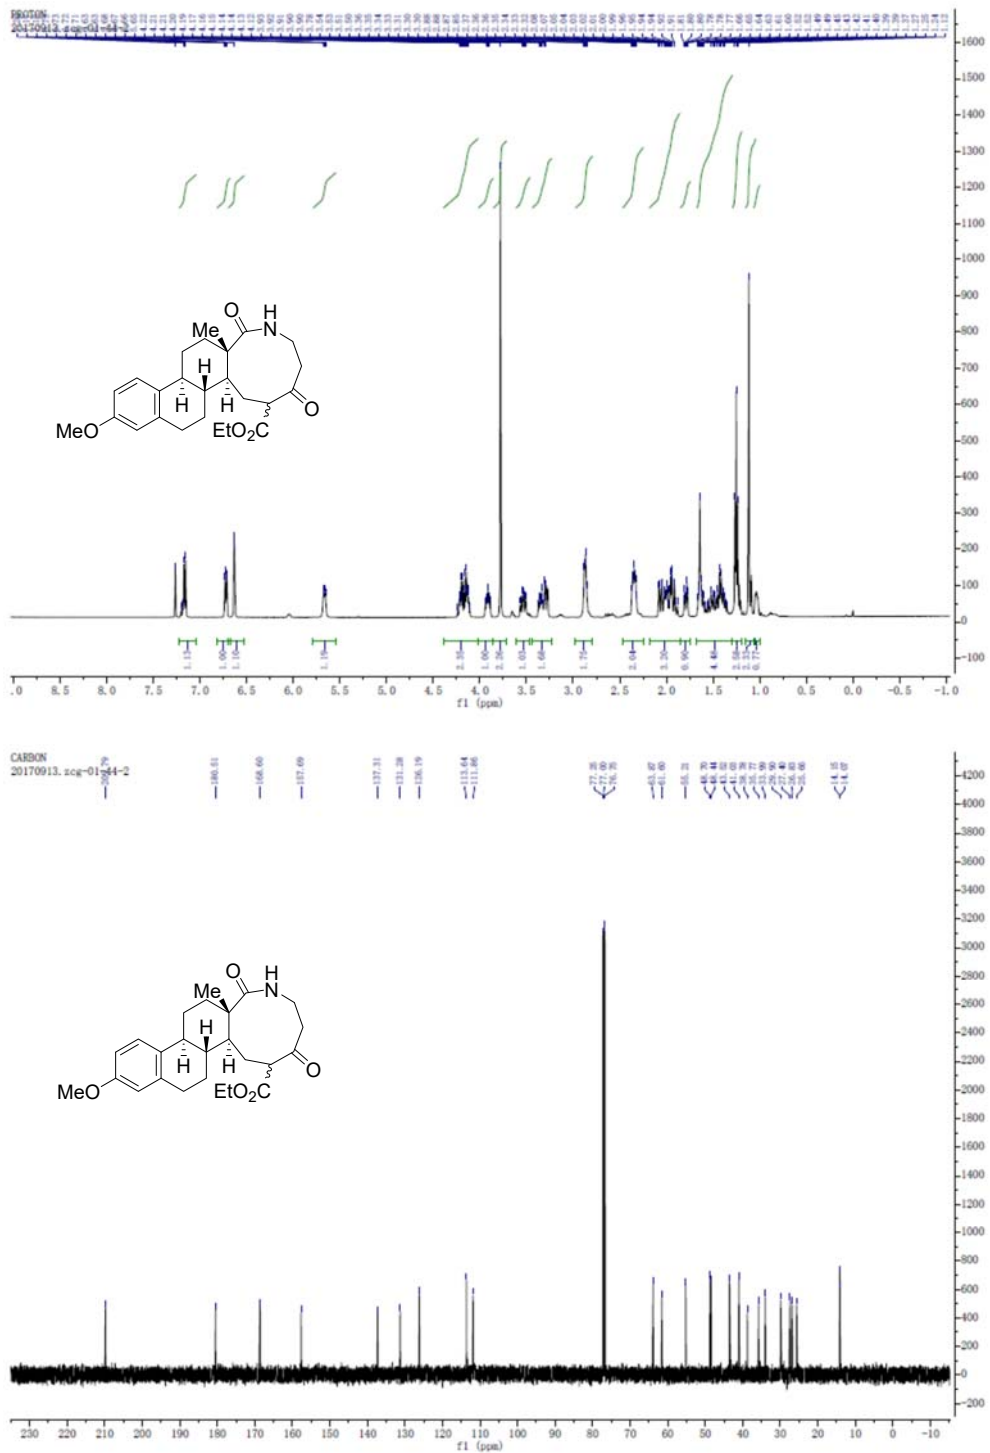

Supplementary Figure 48.  $^1\text{H}$  and  $^{13}\text{C}$  spectra of 12.

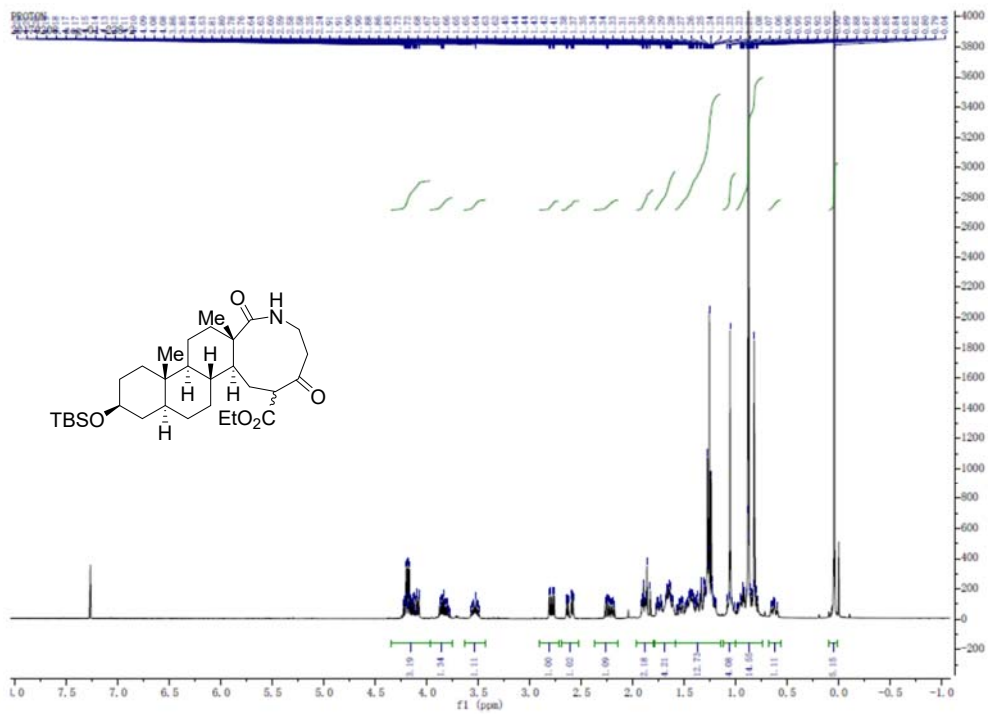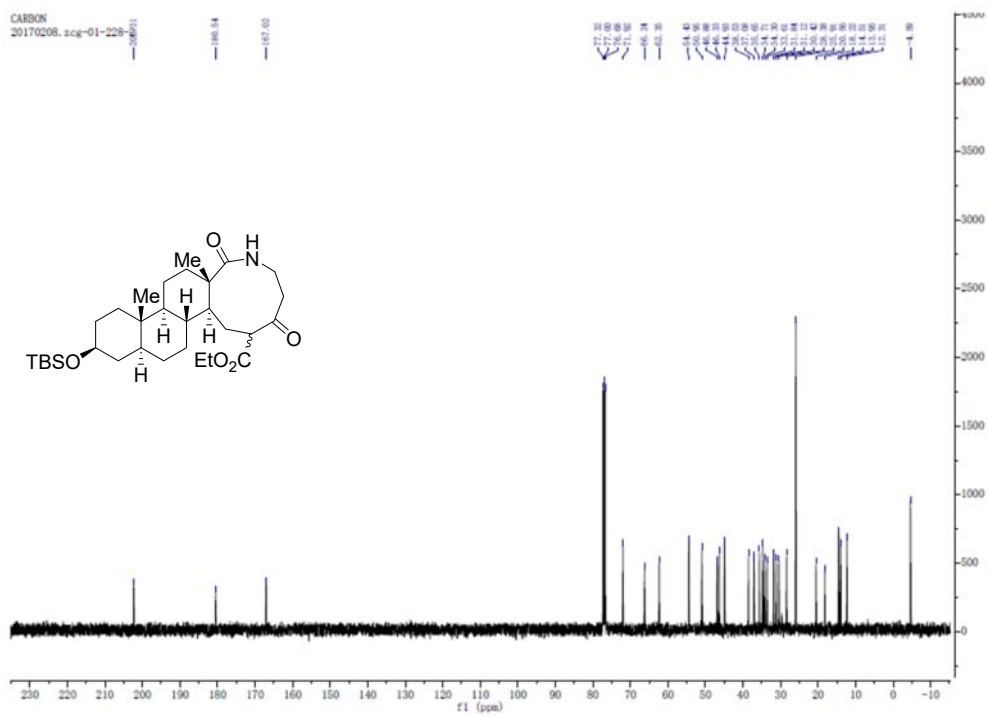

Supplementary Figure 49. <sup>1</sup>H and <sup>13</sup>C spectra of 17.

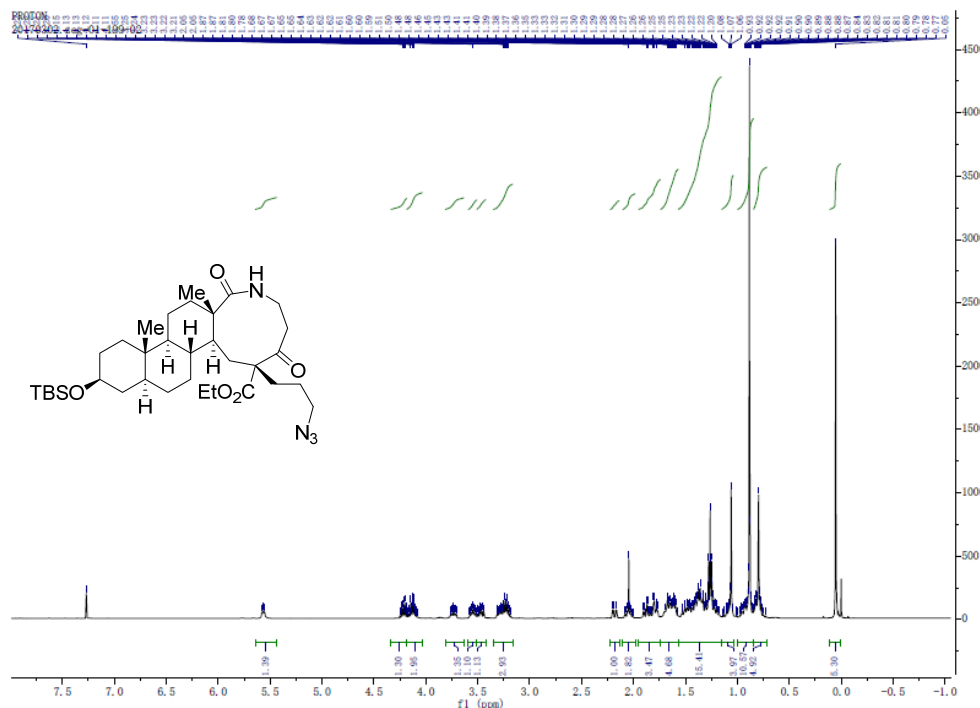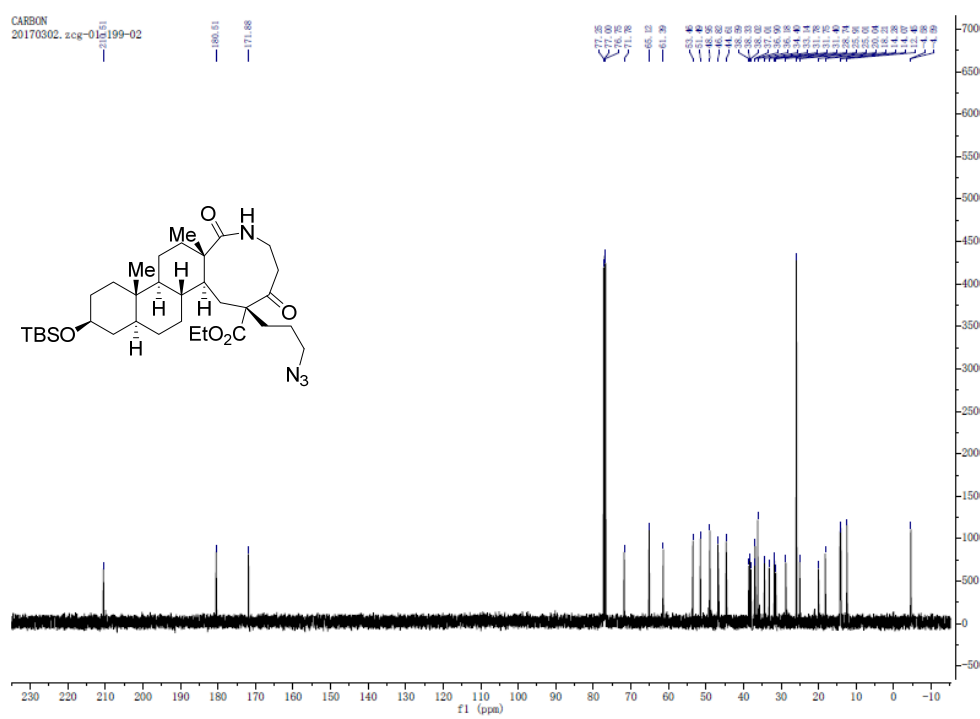

Supplementary Figure 50. <sup>1</sup>H and <sup>13</sup>C spectra of S7.

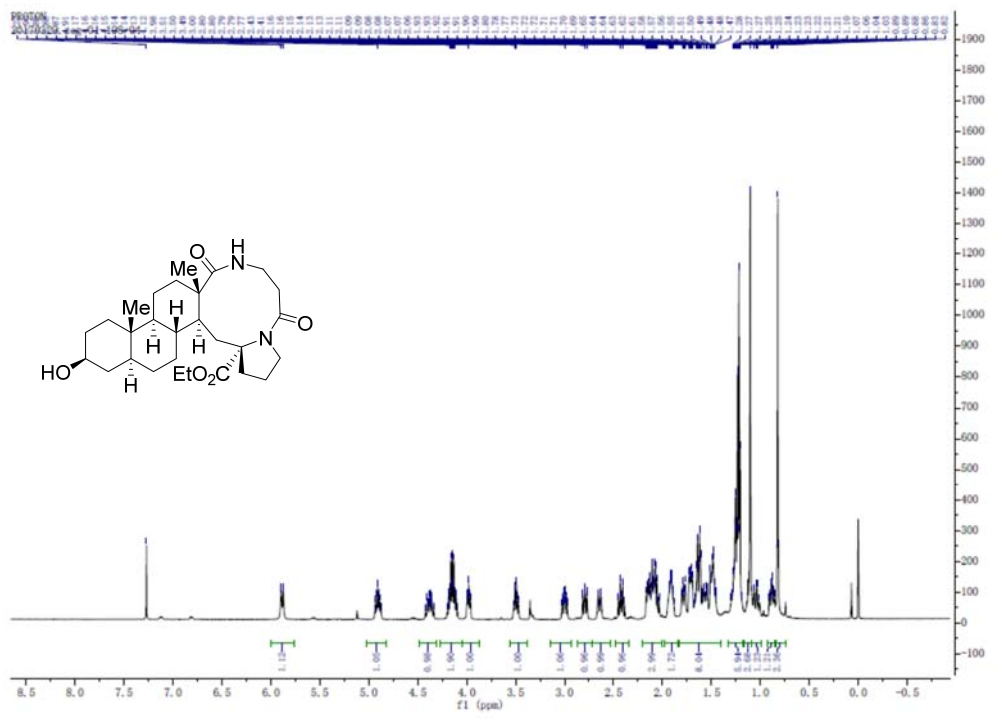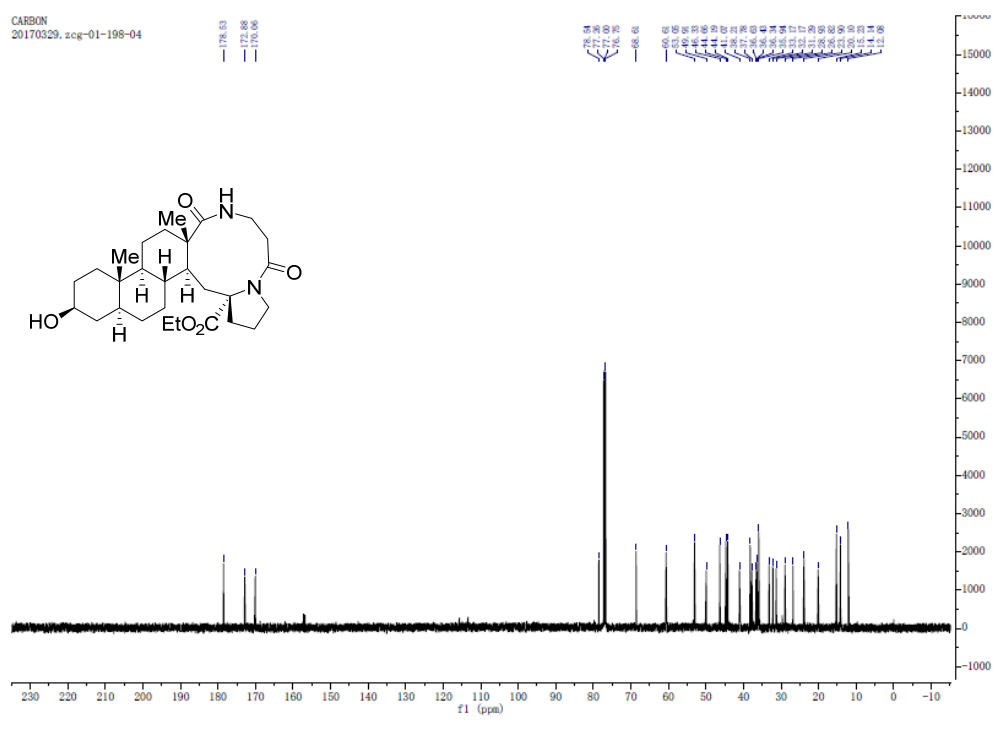

Supplementary Figure 51.  $^1\text{H}$  and  $^{13}\text{C}$  spectra of 18.



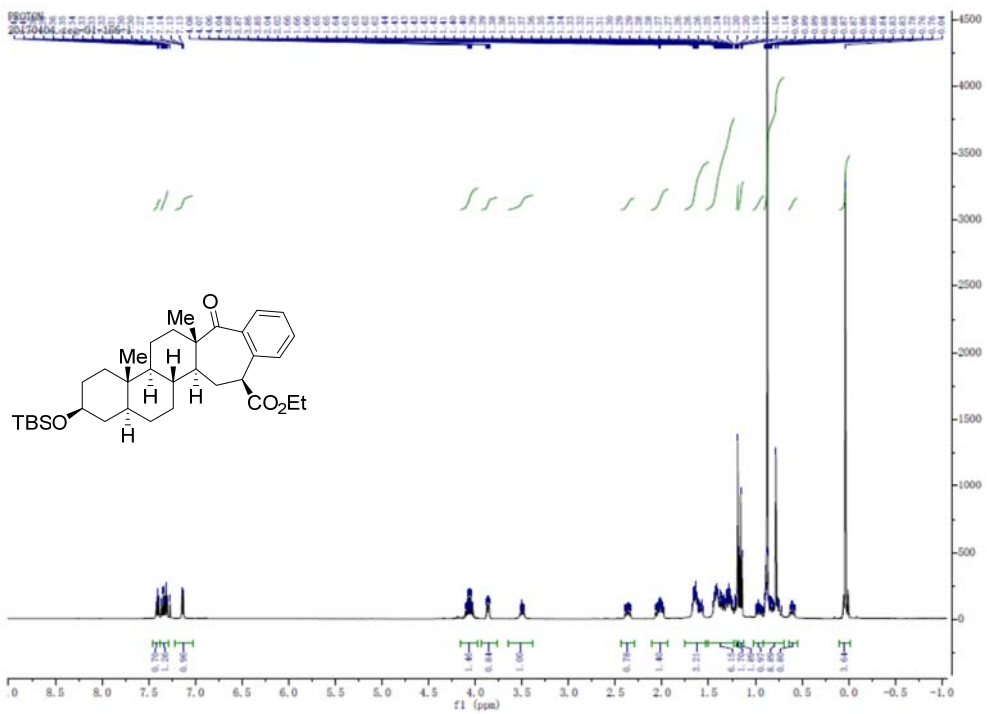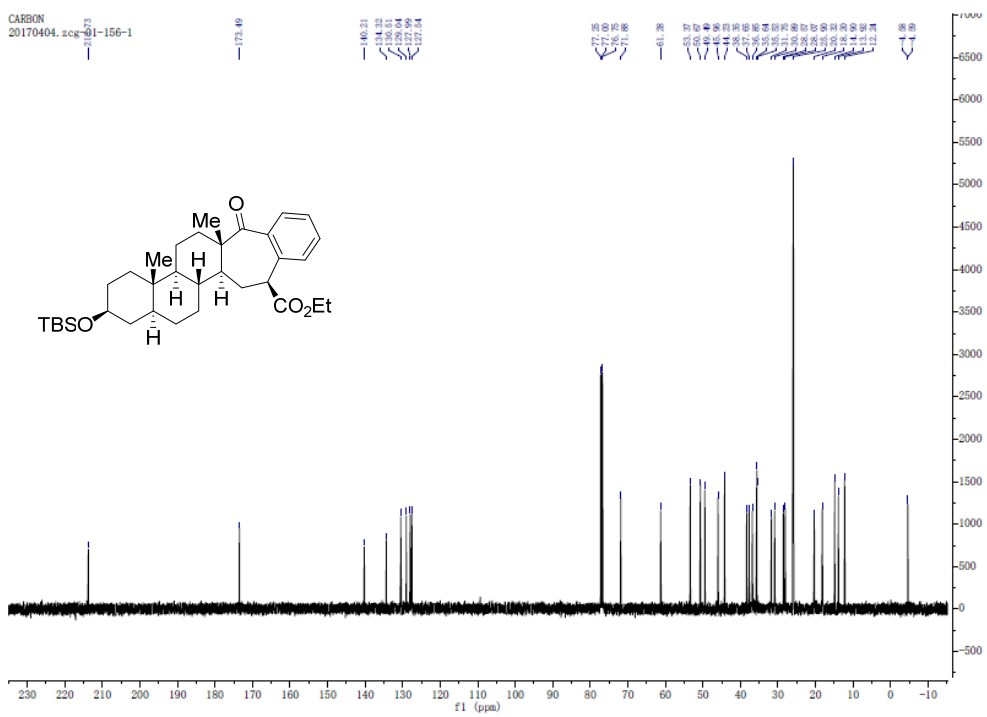

Supplementary Figure 52.  $^1\text{H}$ ,  $^{13}\text{C}$  and DEPT 135 spectra of 14.

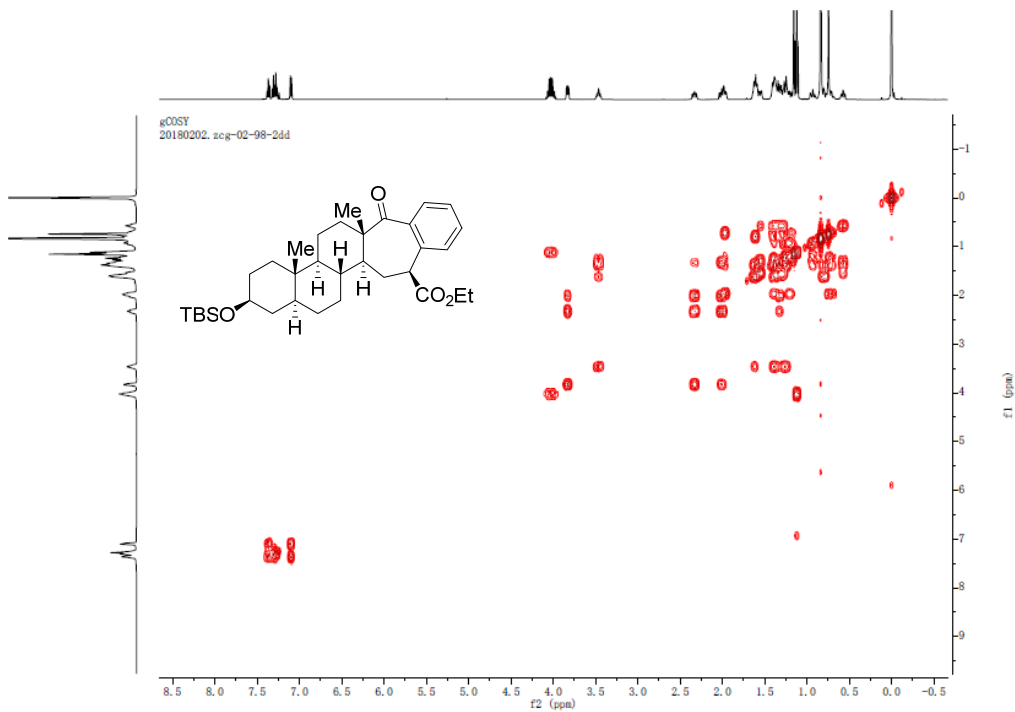

Supplementary Figure 53. H-H Cosy spectra of 14.

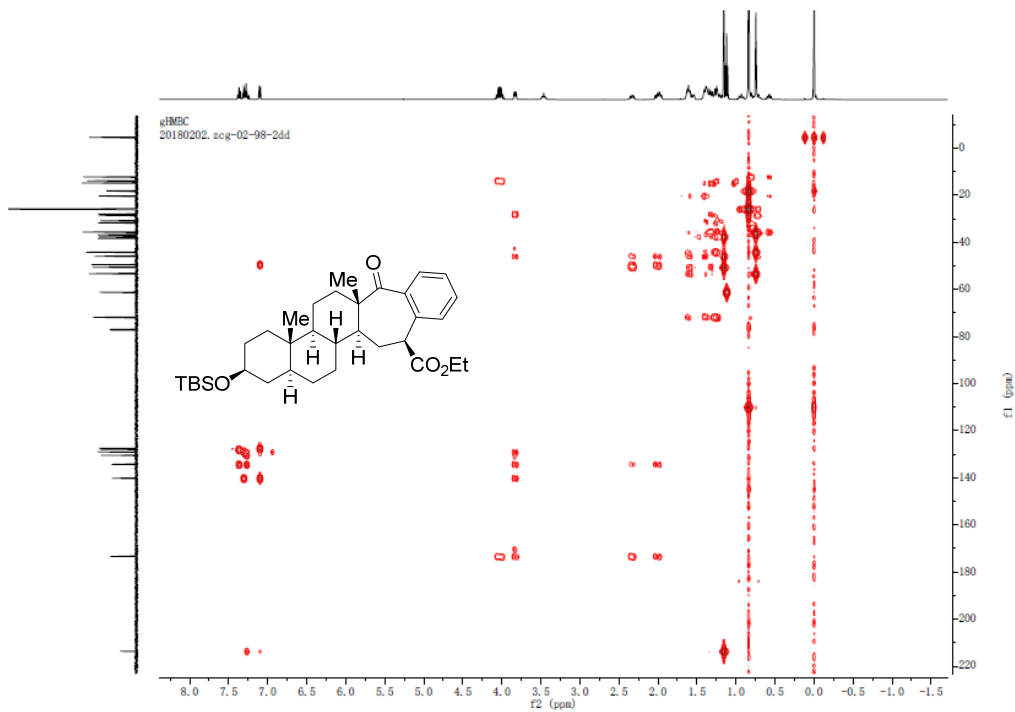

Supplementary Figure 54. HMBC spectra of 14.

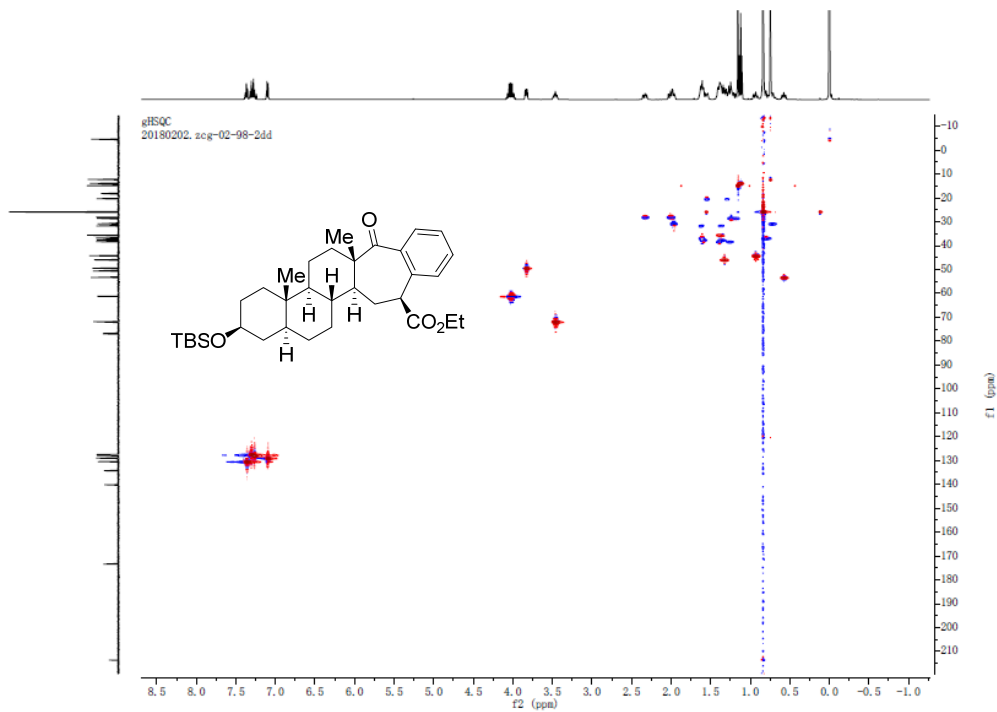

Supplementary Figure 55. HSQC spectra of 14.

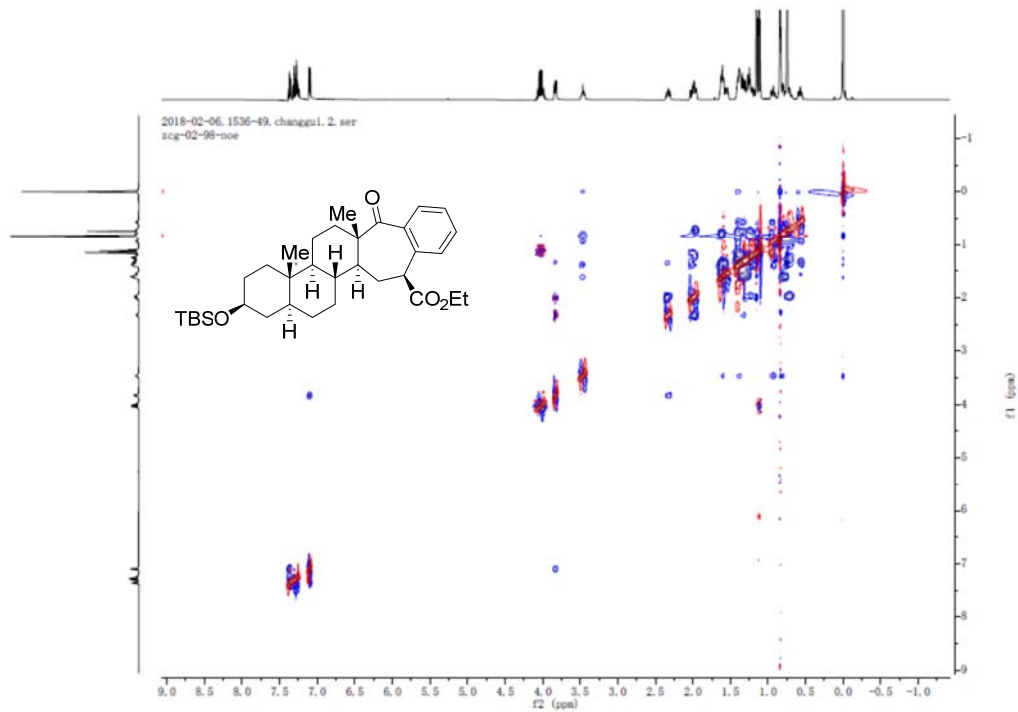

Supplementary Figure 56. 2D Noesy of 14.



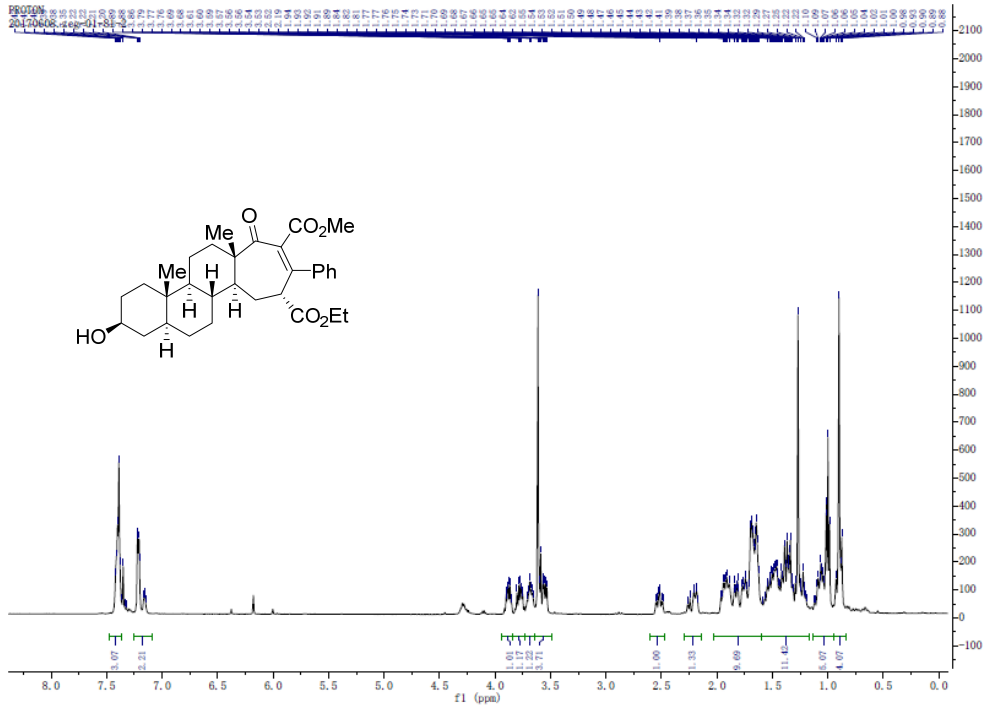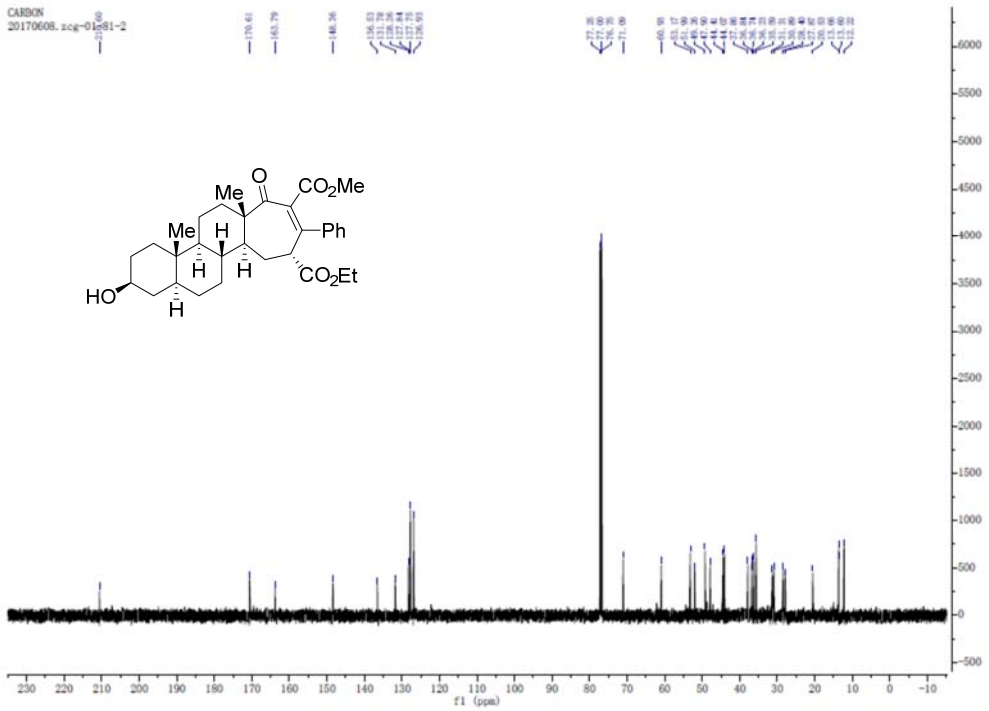

Supplementary Figure 58. <sup>1</sup>H and <sup>13</sup>C spectra of 16.

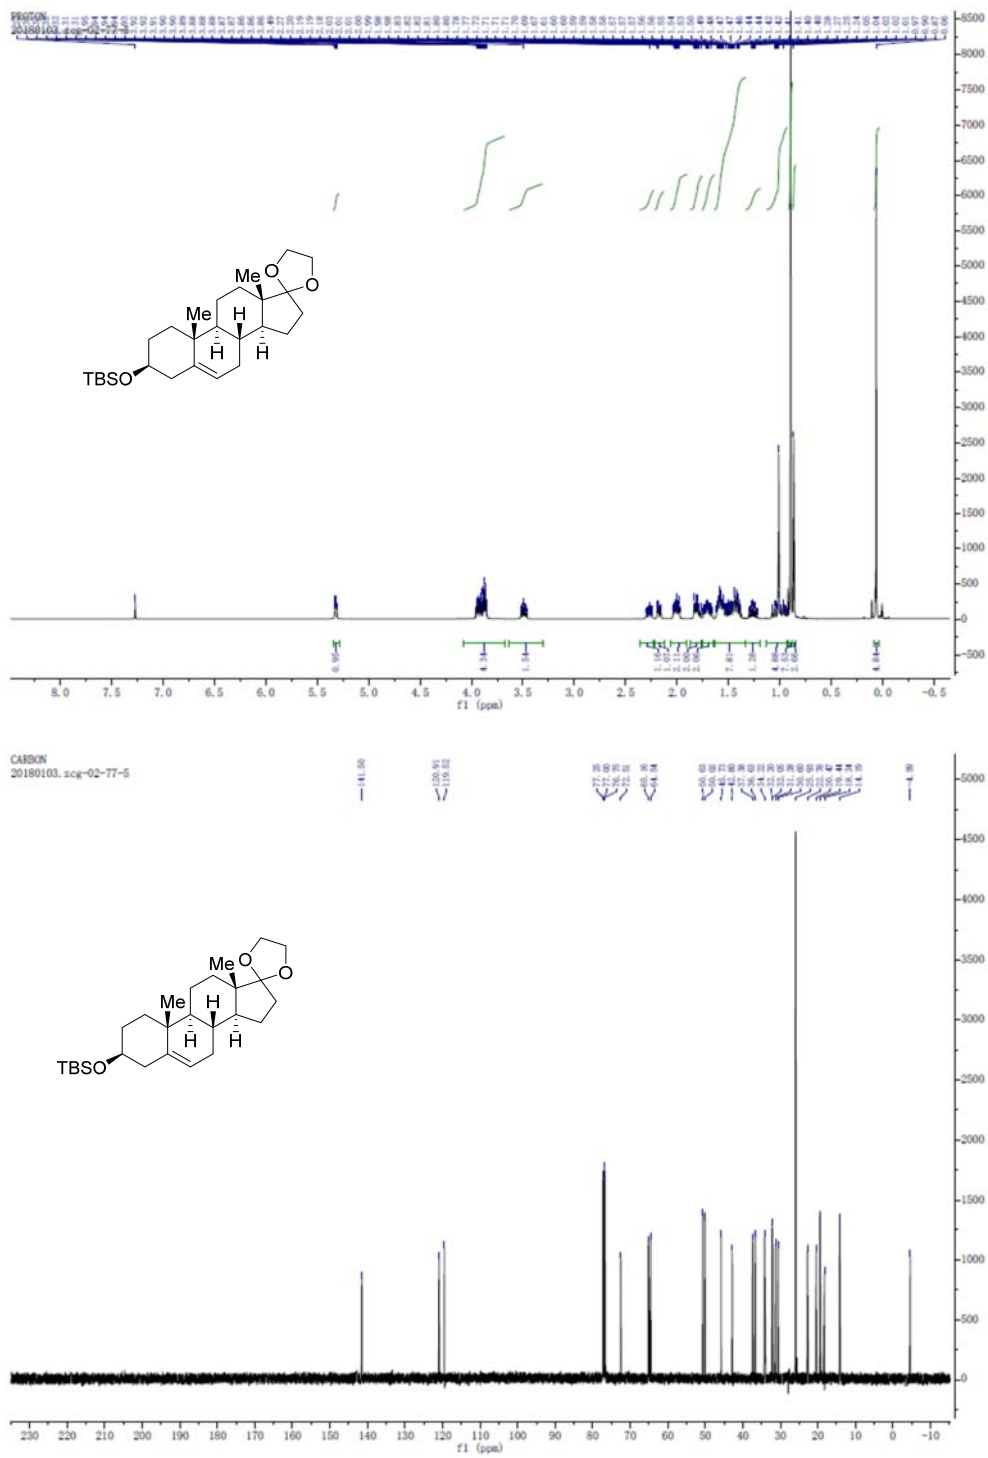

Supplementary Figure 59.  $^1\text{H}$  and  $^{13}\text{C}$  spectra of 19g.

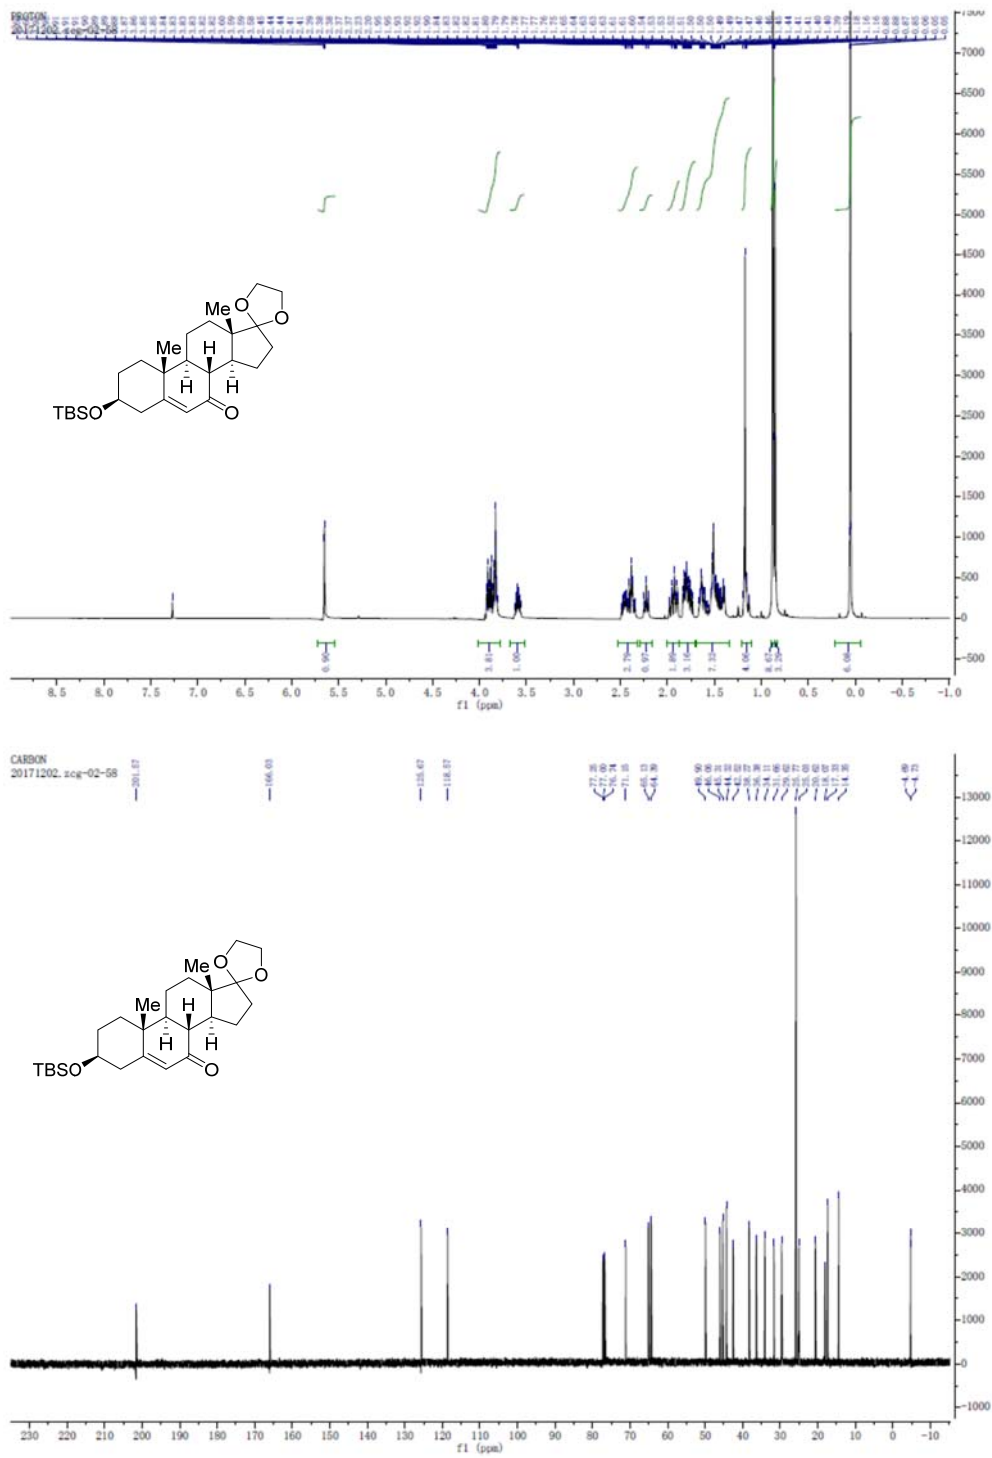

Supplementary Figure 60.  $^1\text{H}$  and  $^{13}\text{C}$  spectra of 20g.

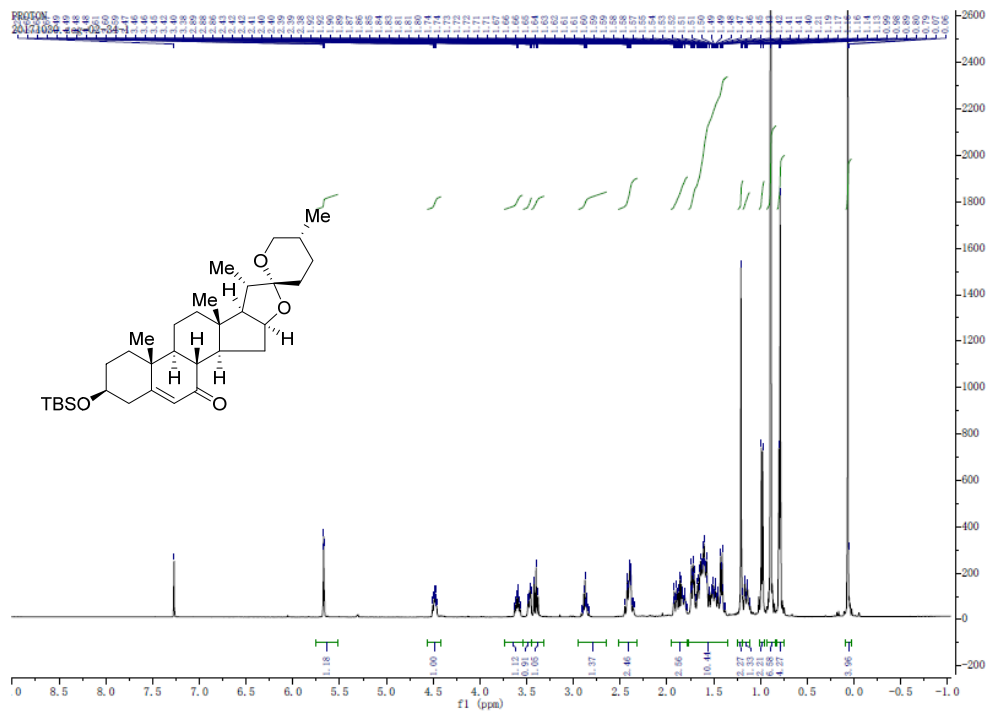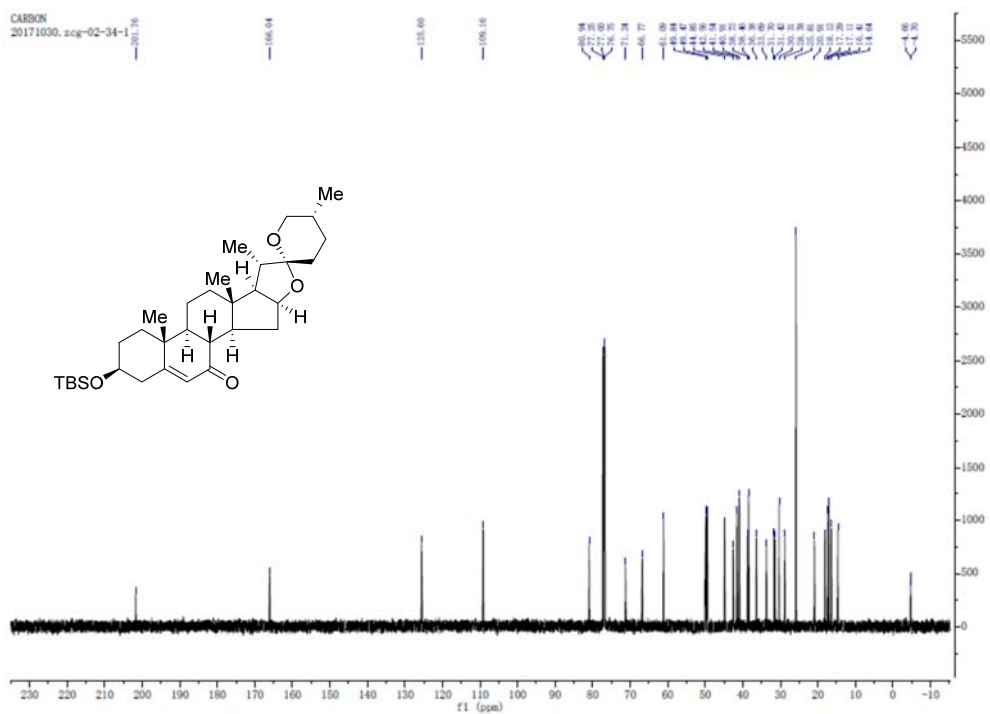

Supplementary Figure 61.  $^1\text{H}$  and  $^{13}\text{C}$  spectra of 20h.





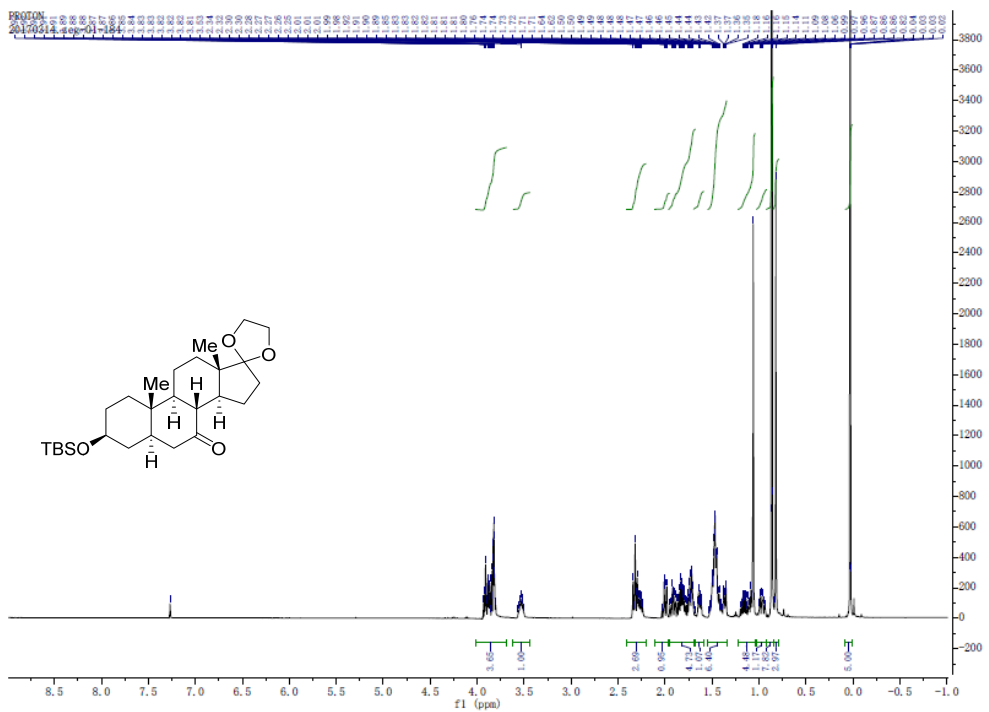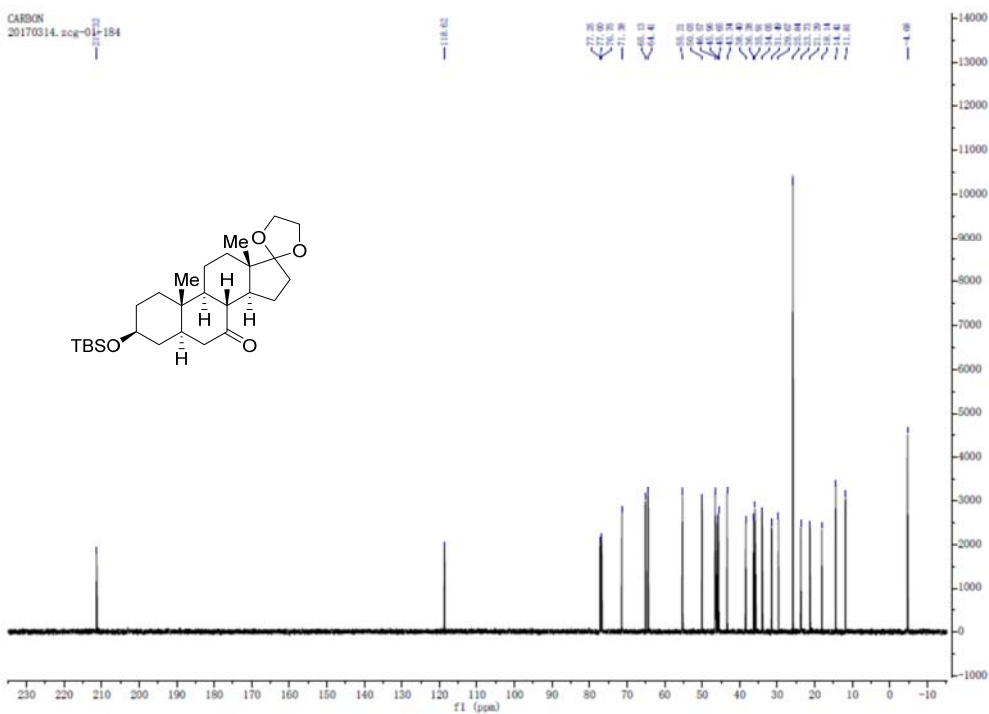

Supplementary Figure 63.  $^1\text{H}$  and  $^{13}\text{C}$  spectra of S8g.

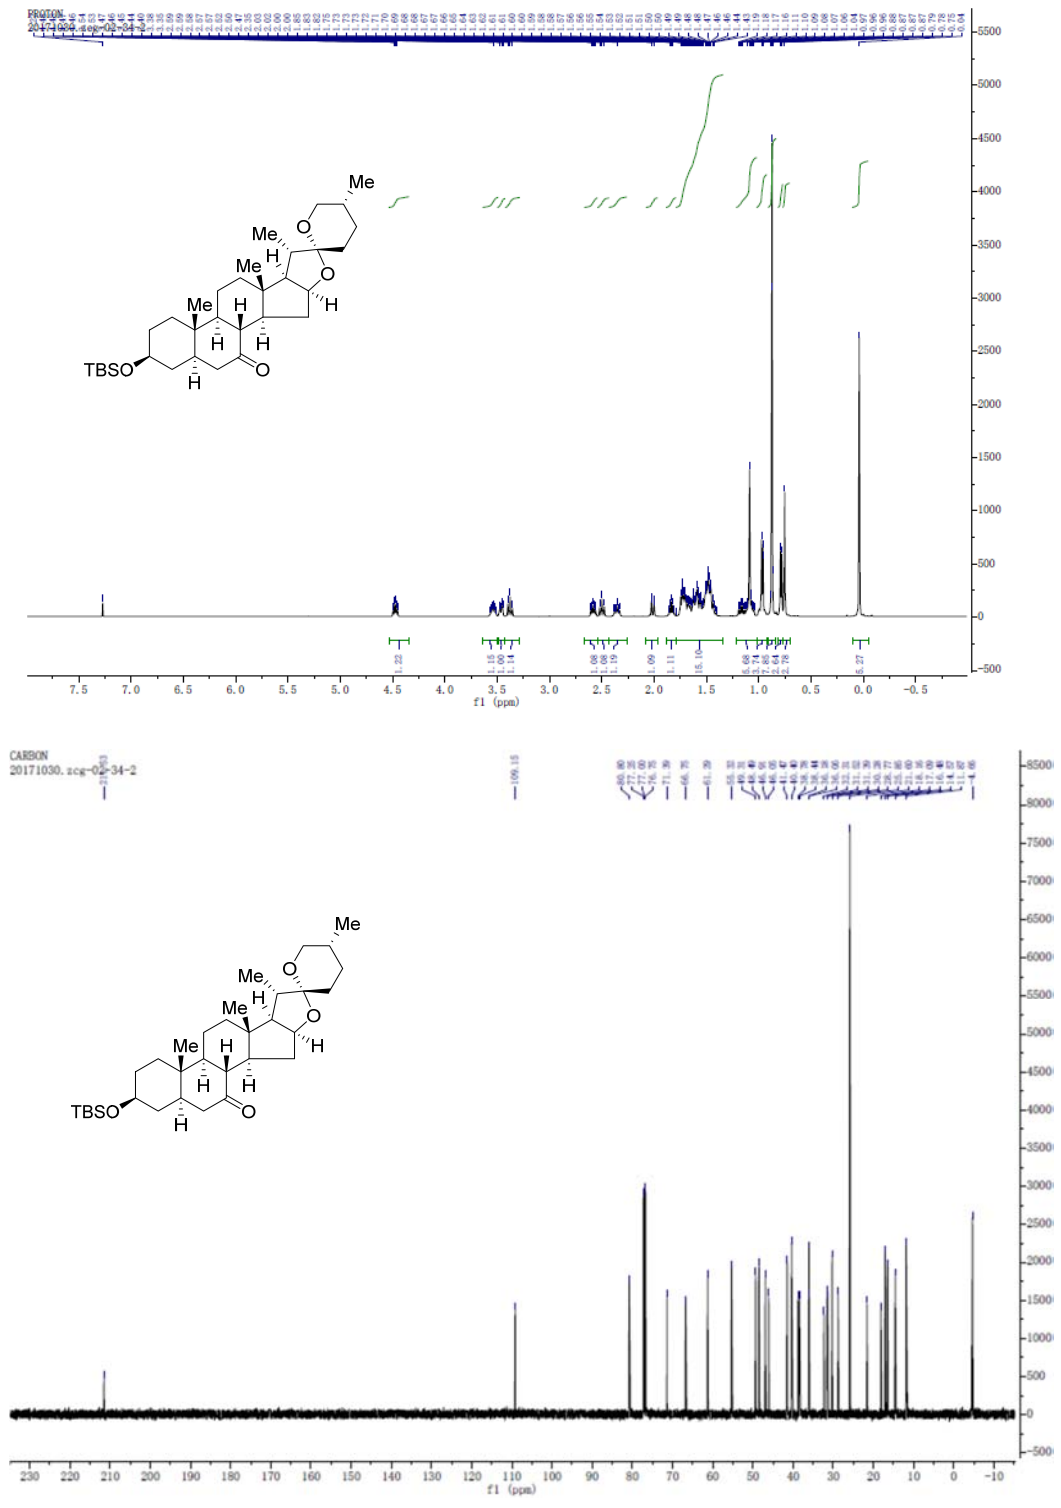

**Supplementary Figure 64.** <sup>1</sup>H and <sup>13</sup>C spectra of S8h.

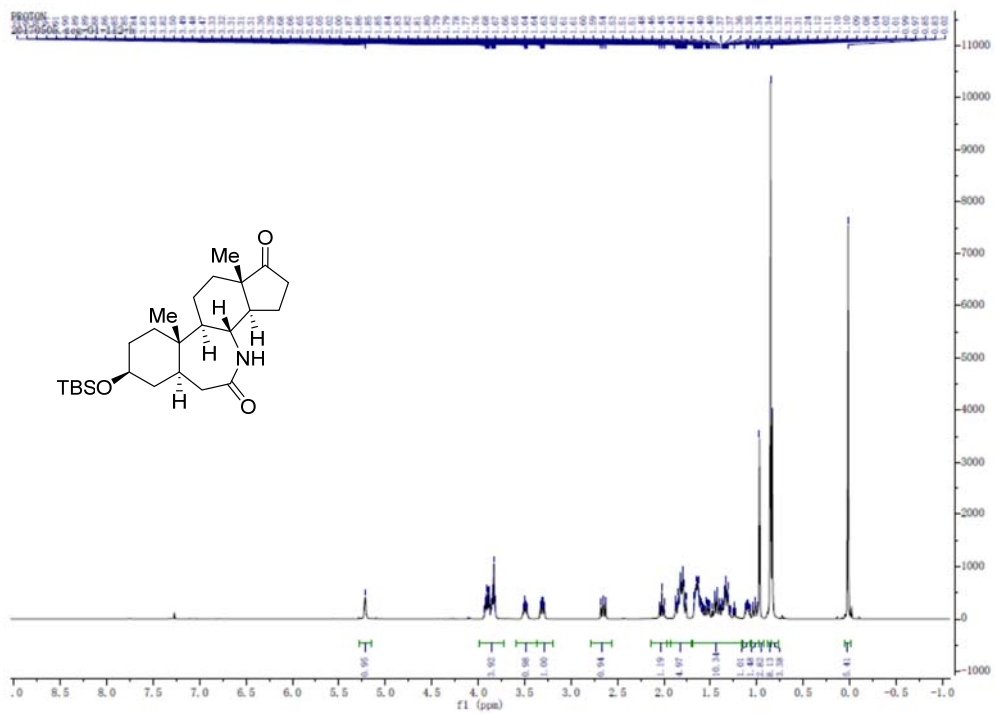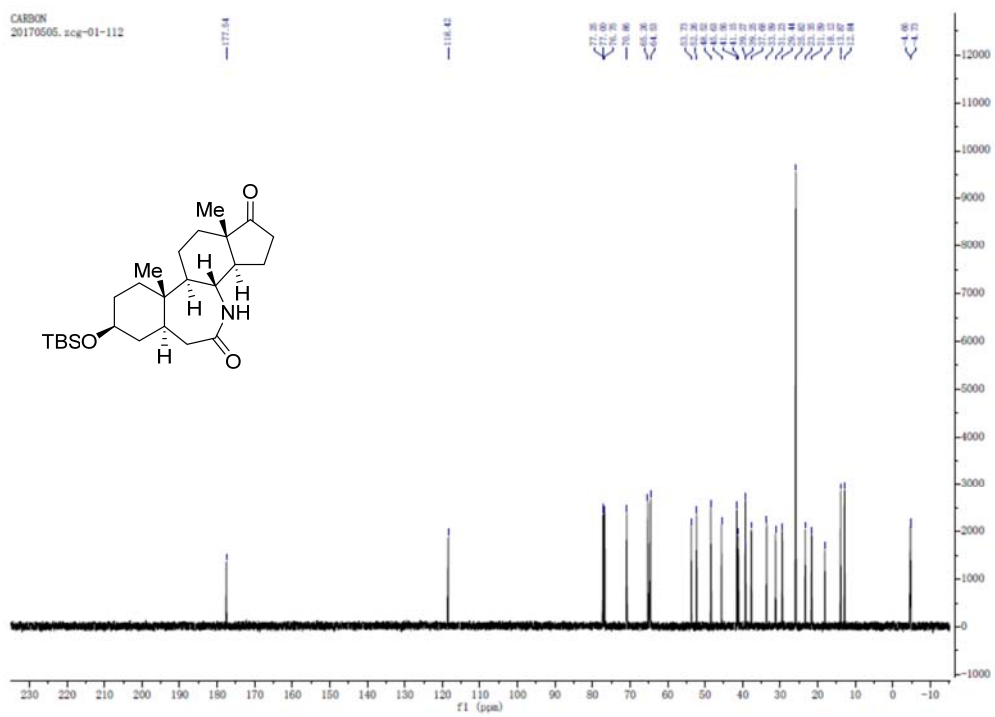

Supplementary Figure 65. <sup>1</sup>H and <sup>13</sup>C spectra of S9g.



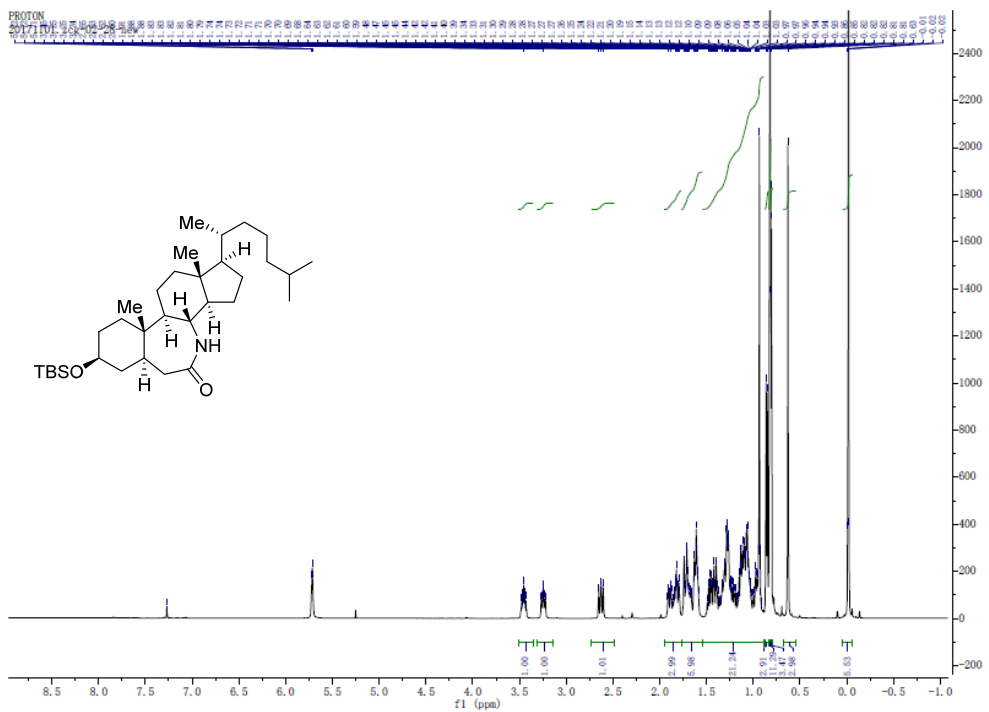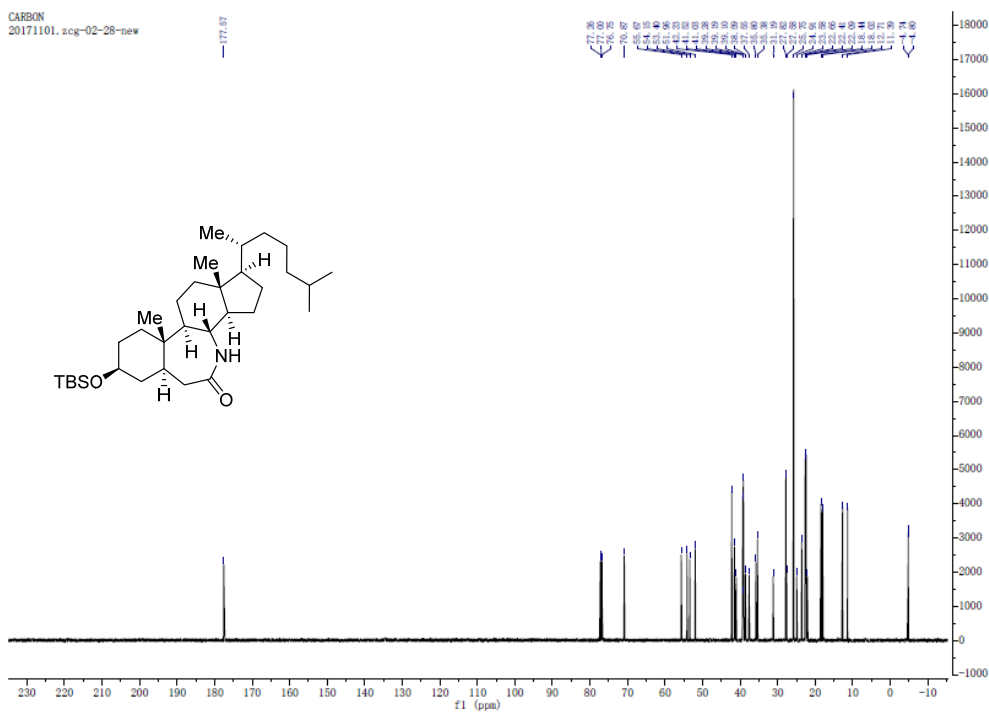

Supplementary Figure 67.  $^1\text{H}$  and  $^{13}\text{C}$  spectra of S9i.

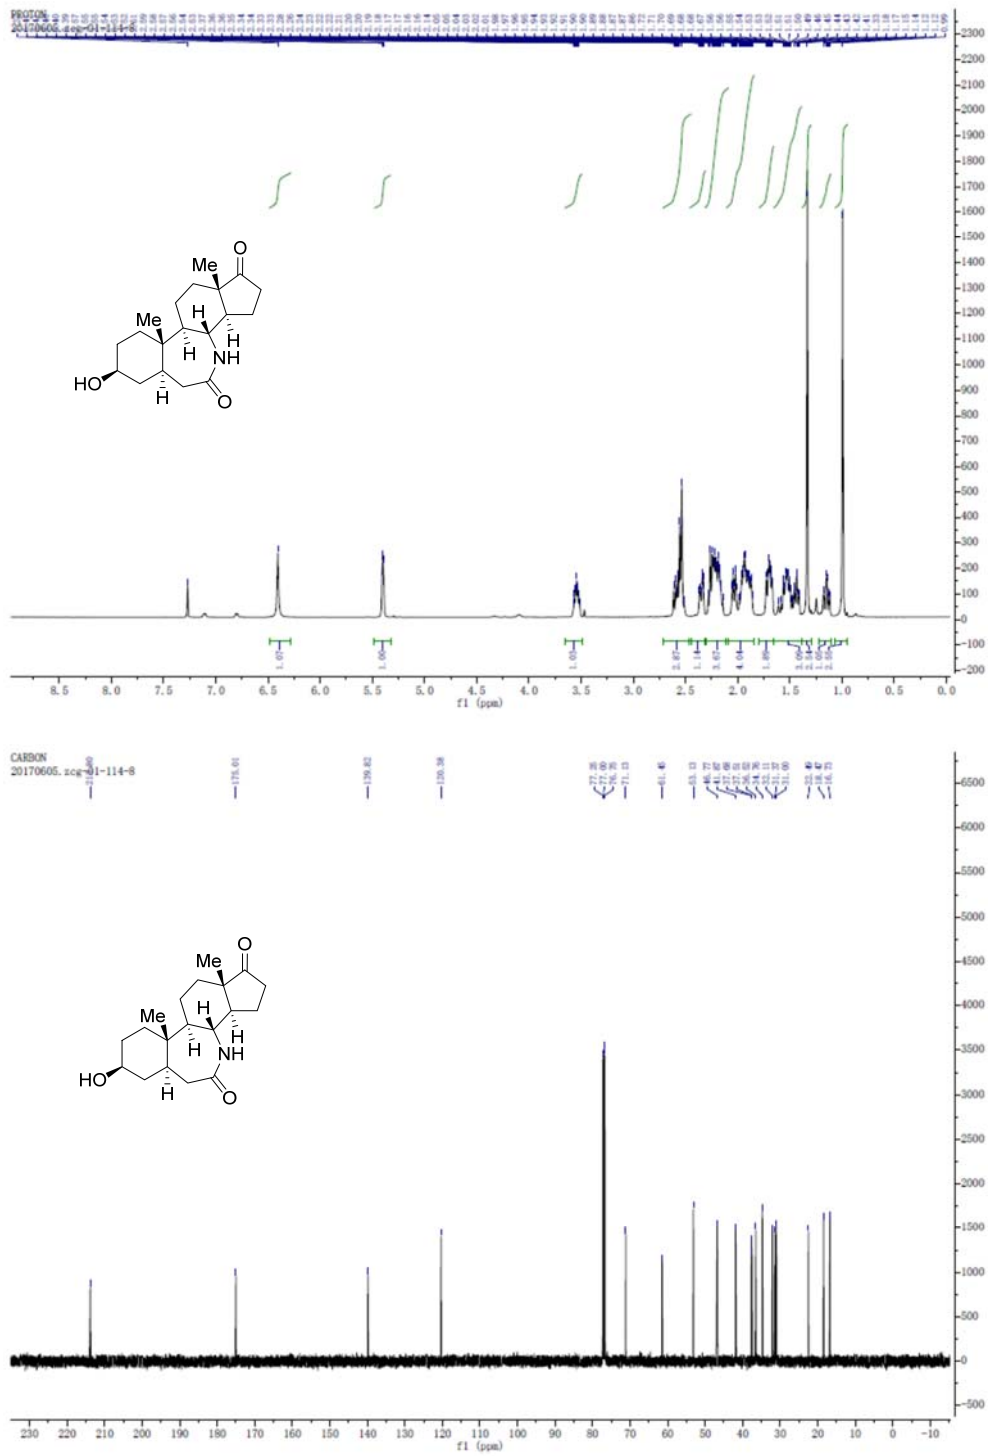

Supplementary Figure 68. <sup>1</sup>H and <sup>13</sup>C spectra of 21g.

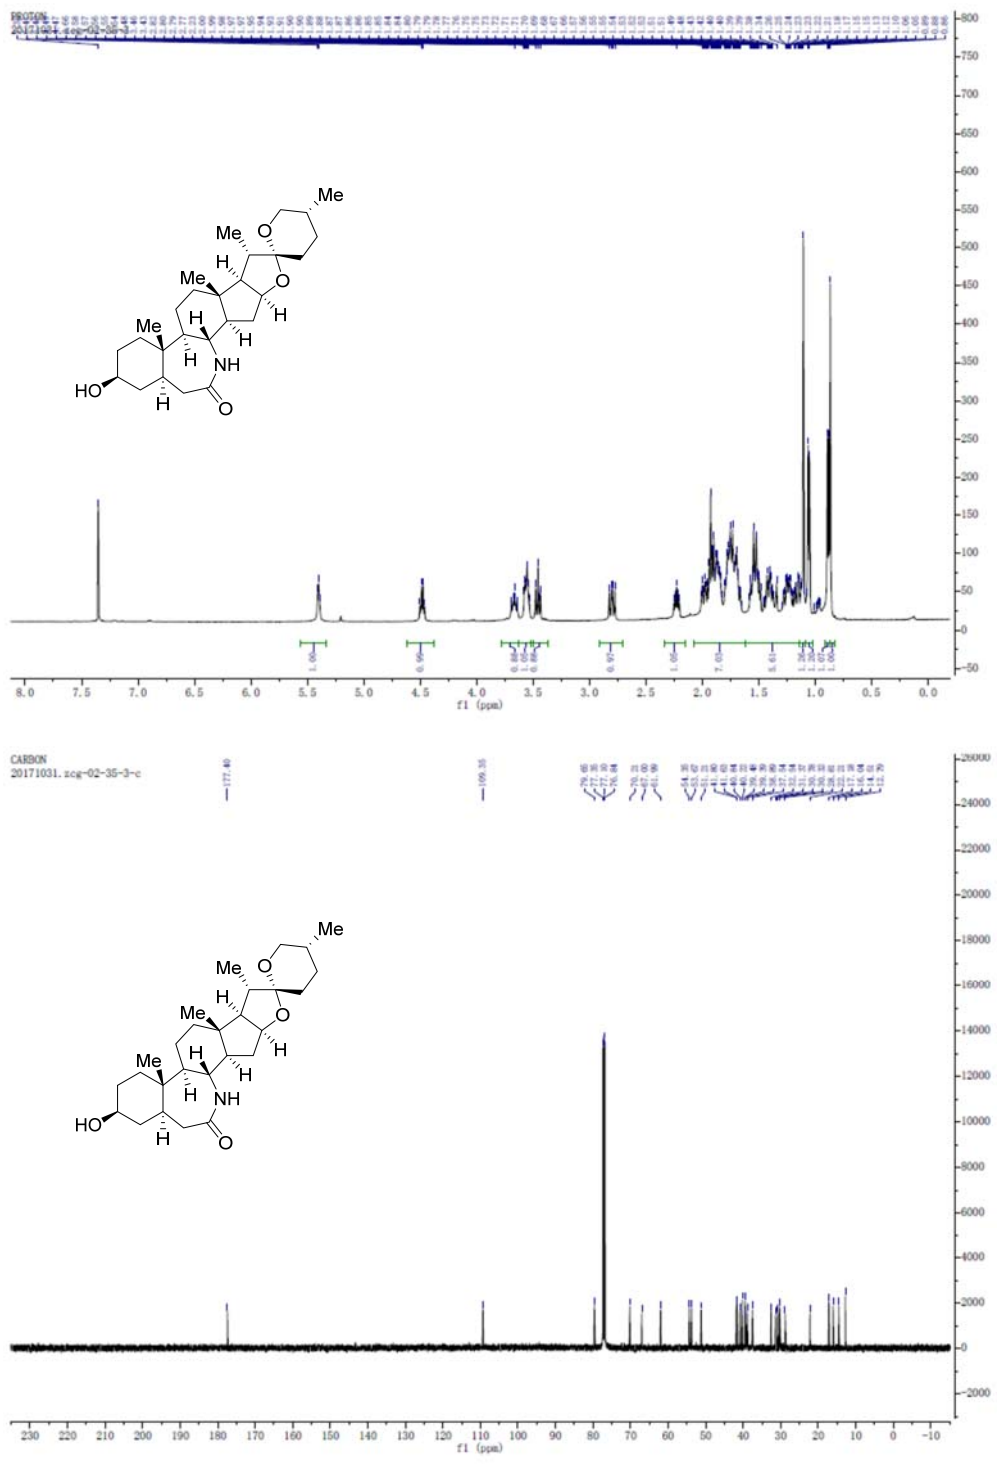

Supplementary Figure 69. <sup>1</sup>H and <sup>13</sup>C spectra of 21h.





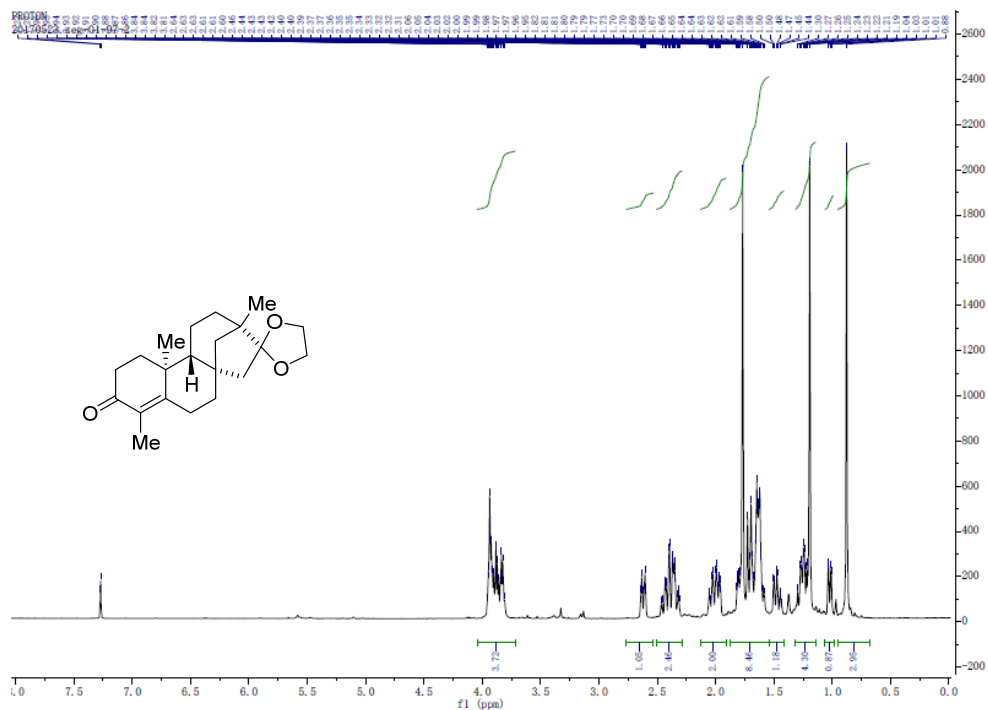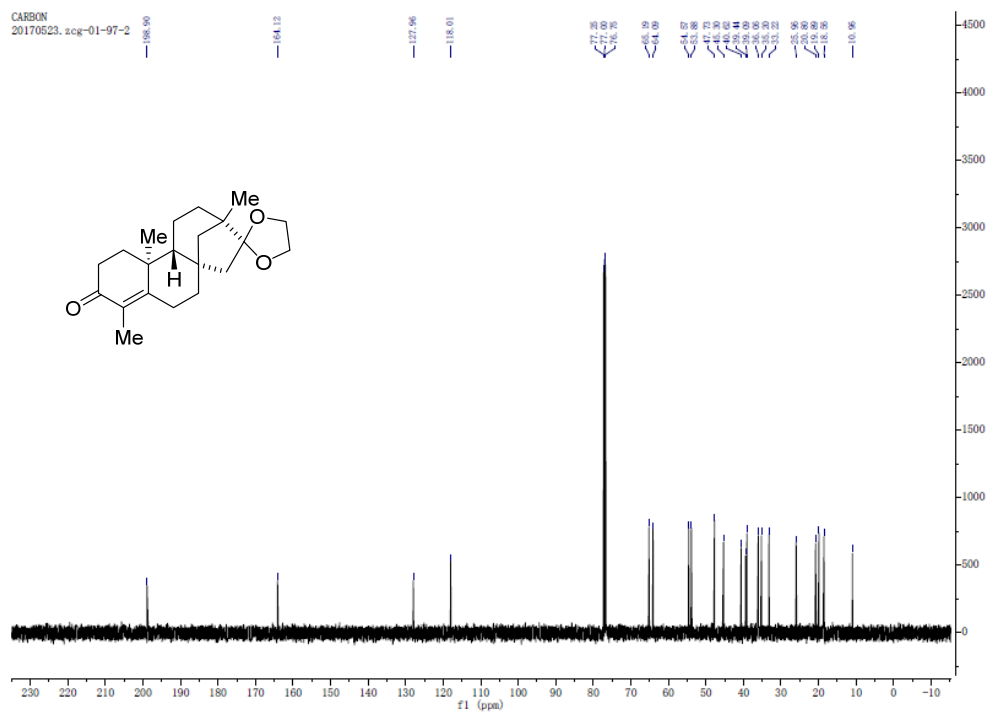

Supplementary Figure 71.  $^1\text{H}$  and  $^{13}\text{C}$  spectra of 23.

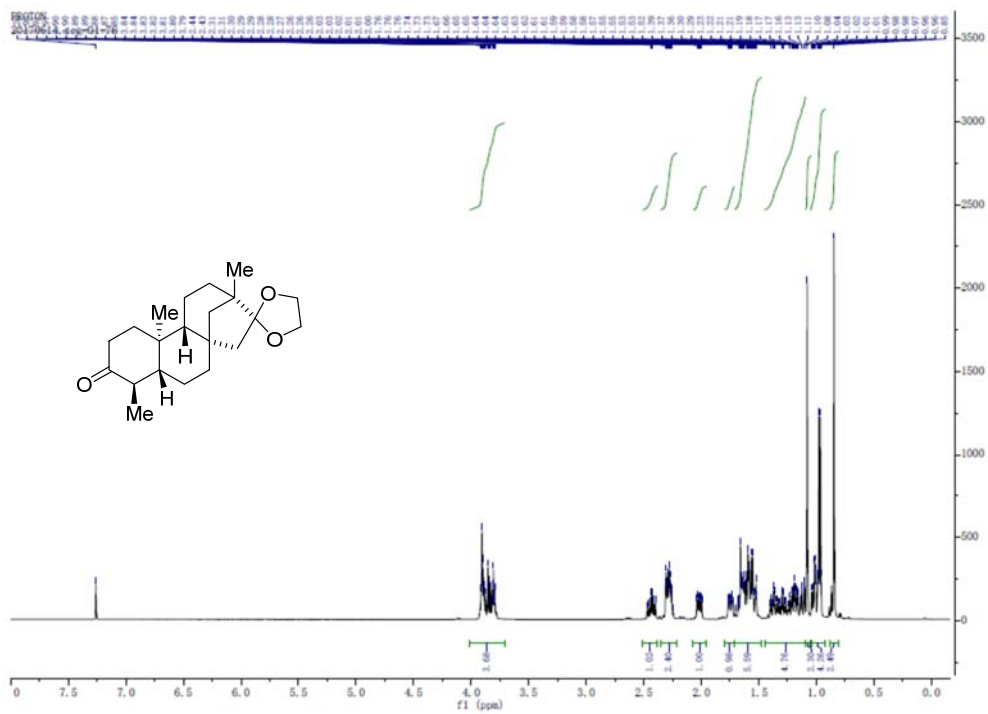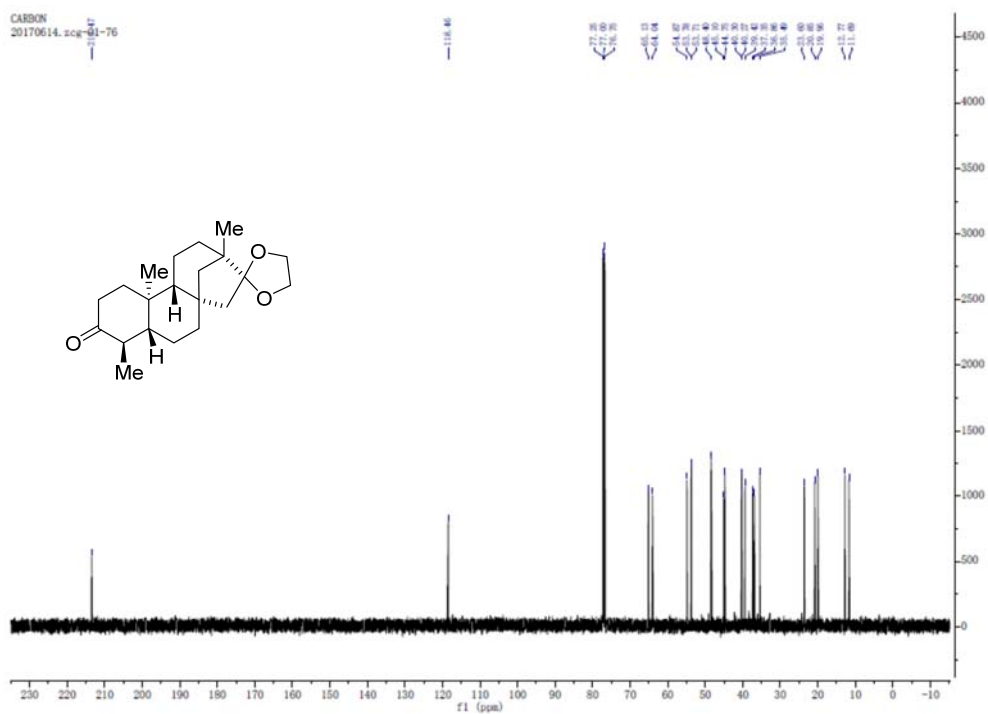

Supplementary Figure 72.  $^1\text{H}$  and  $^{13}\text{C}$  spectra of S10.

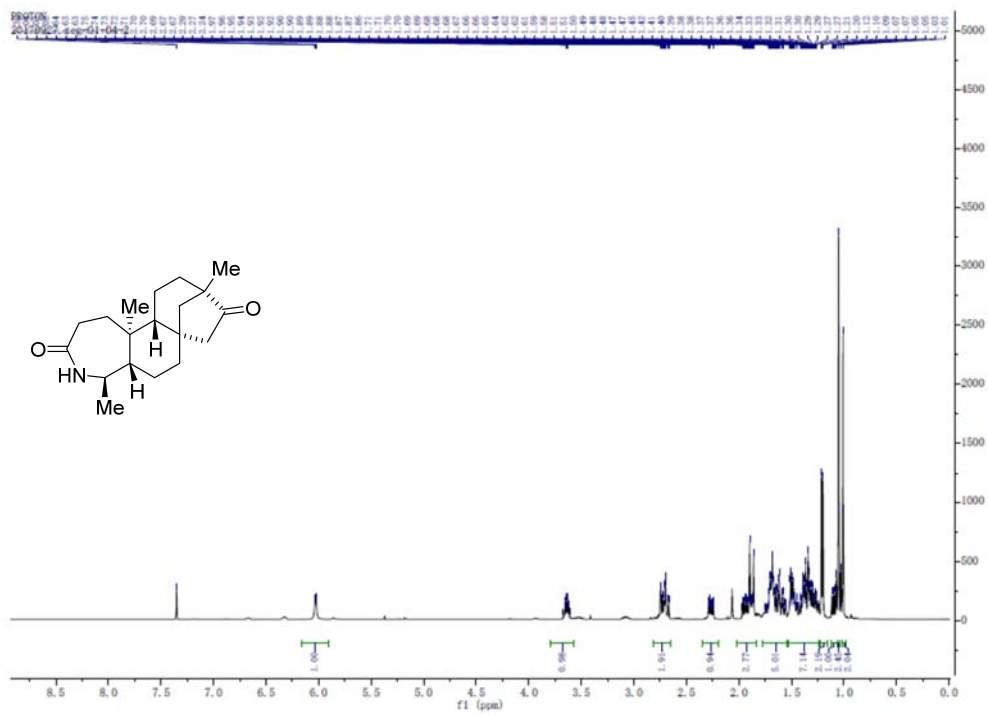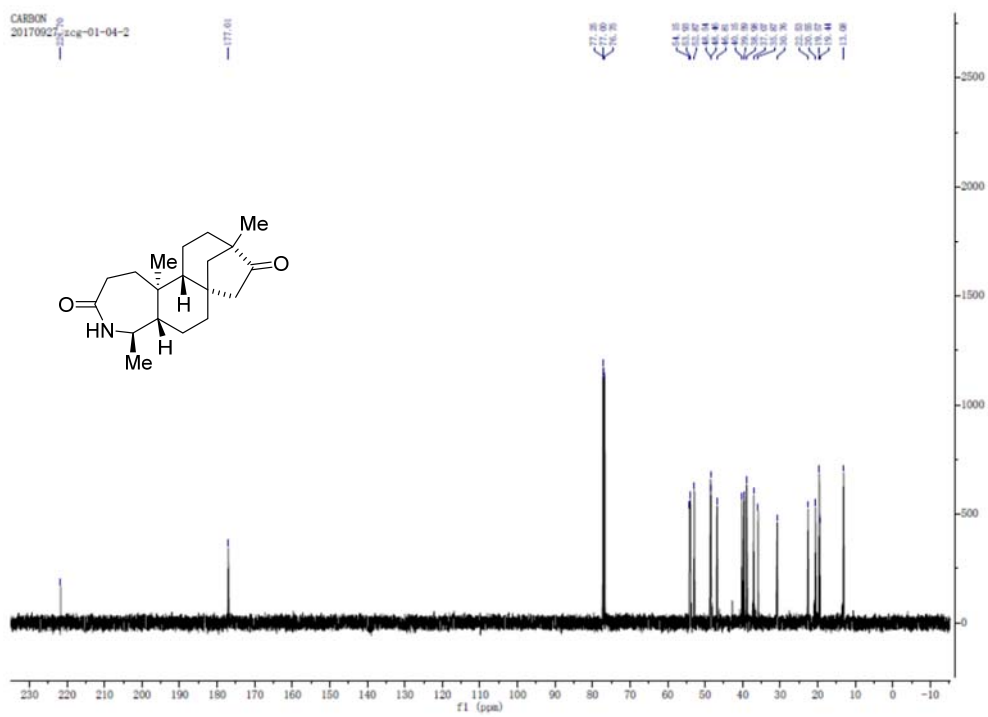

Supplementary Figure 73.  $^1\text{H}$  and  $^{13}\text{C}$  spectra of 24.

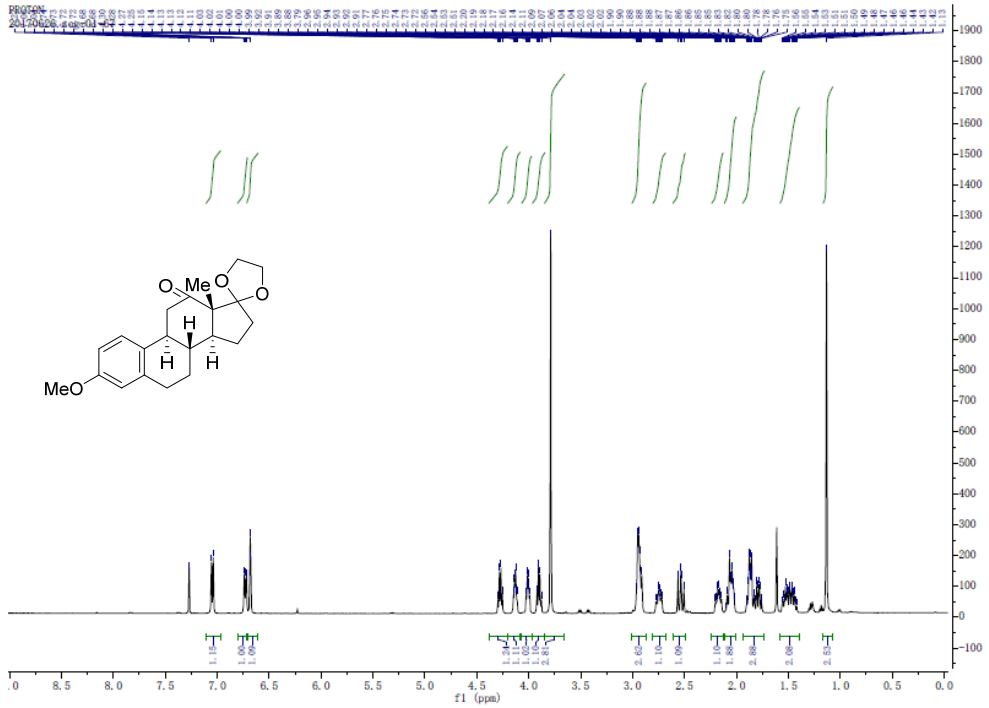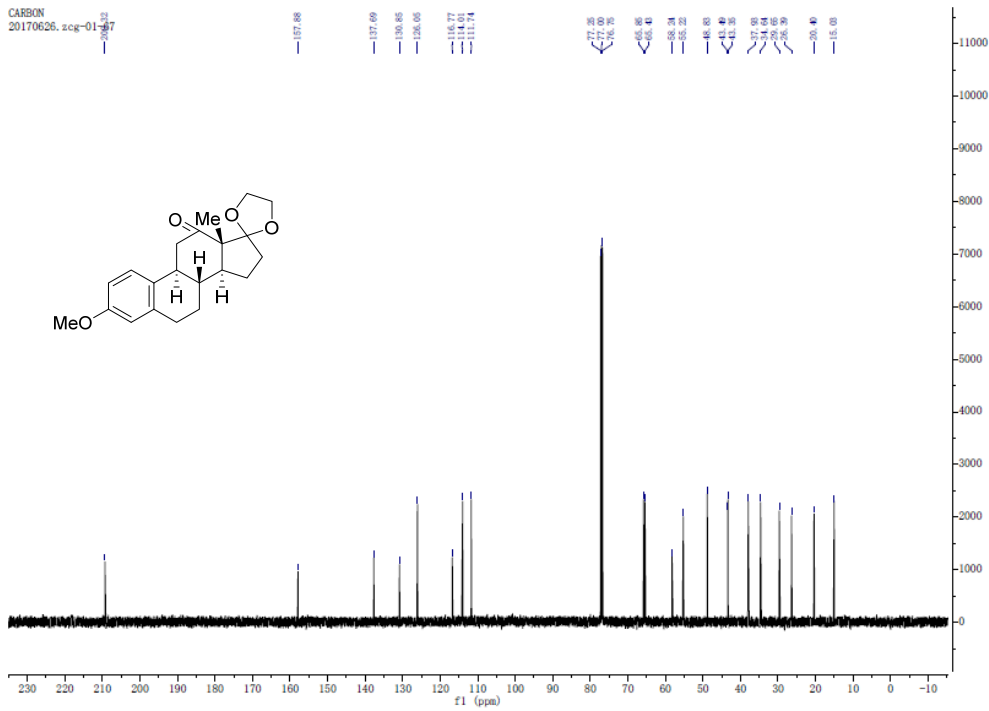

Supplementary Figure 74.  $^1\text{H}$  and  $^{13}\text{C}$  spectra of S12a.

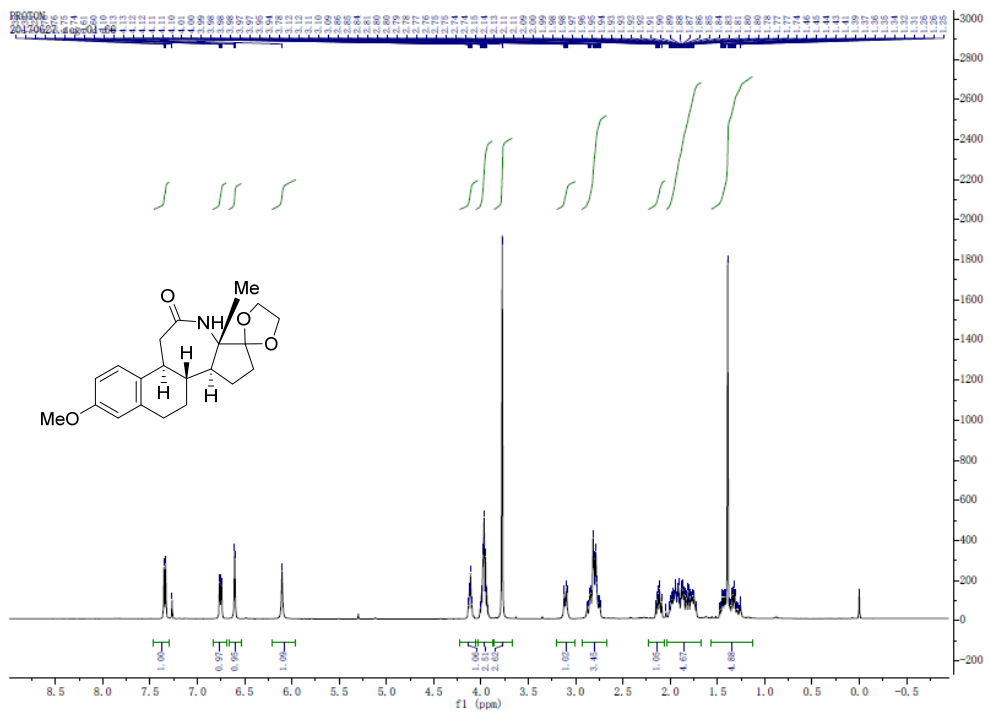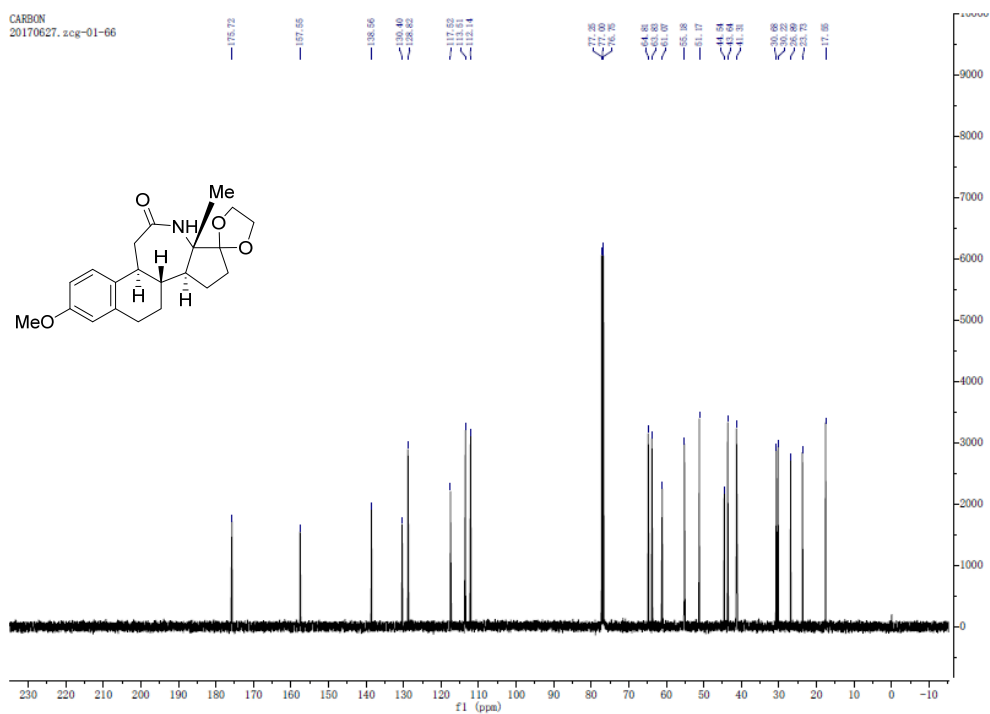

Supplementary Figure 75.  $^1\text{H}$  and  $^{13}\text{C}$  spectra of **27a**.

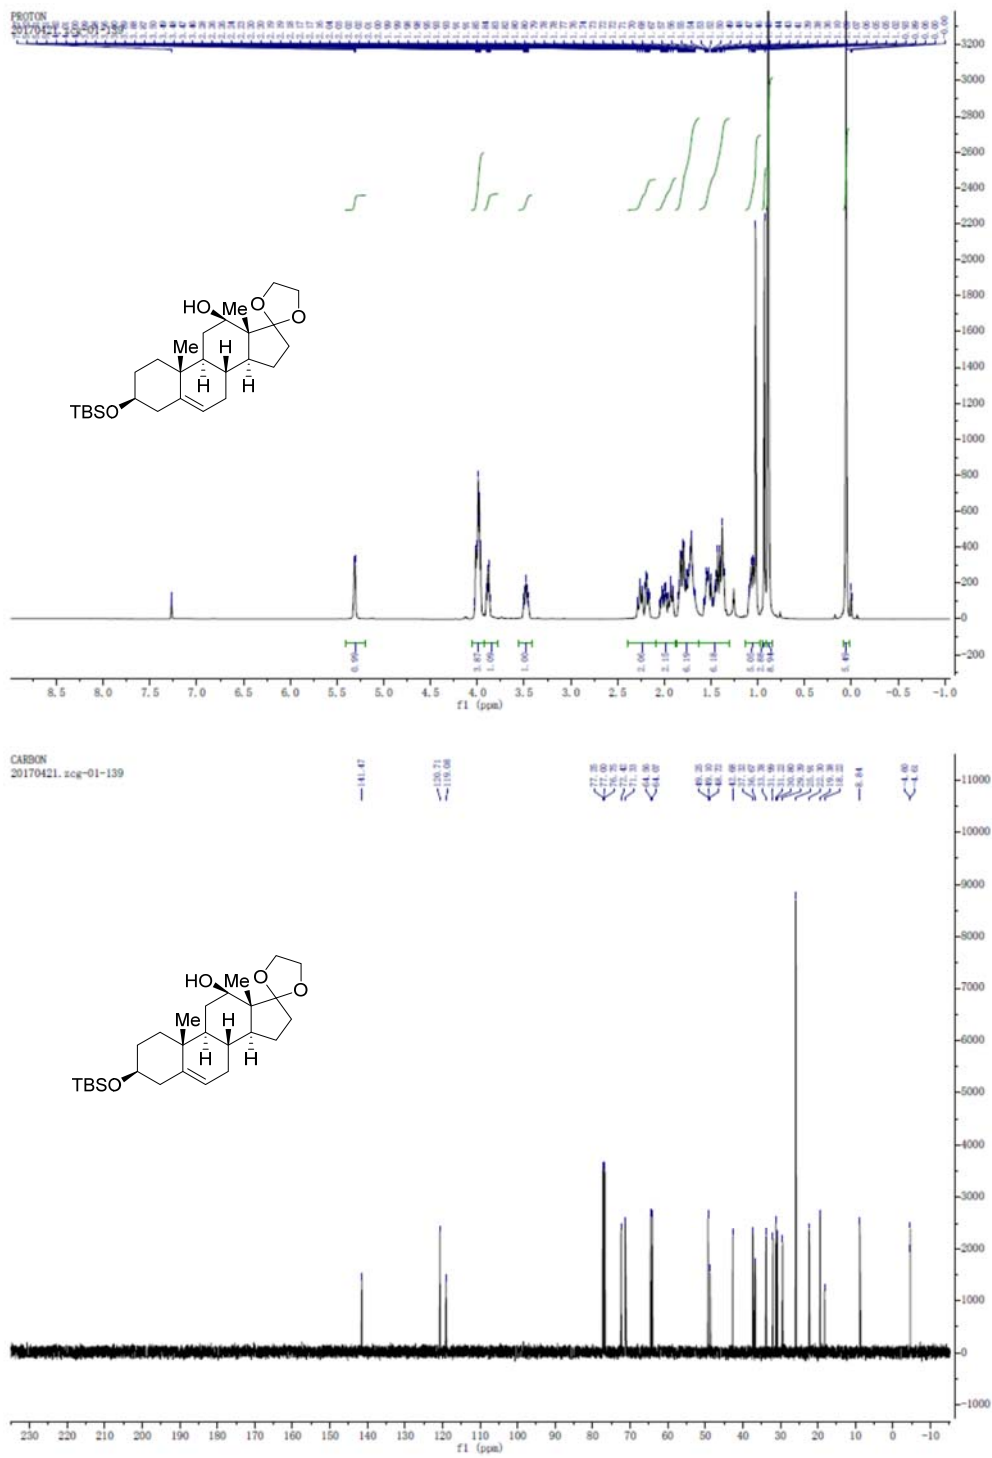

Supplementary Figure 76.  $^1\text{H}$  and  $^{13}\text{C}$  spectra of S11.





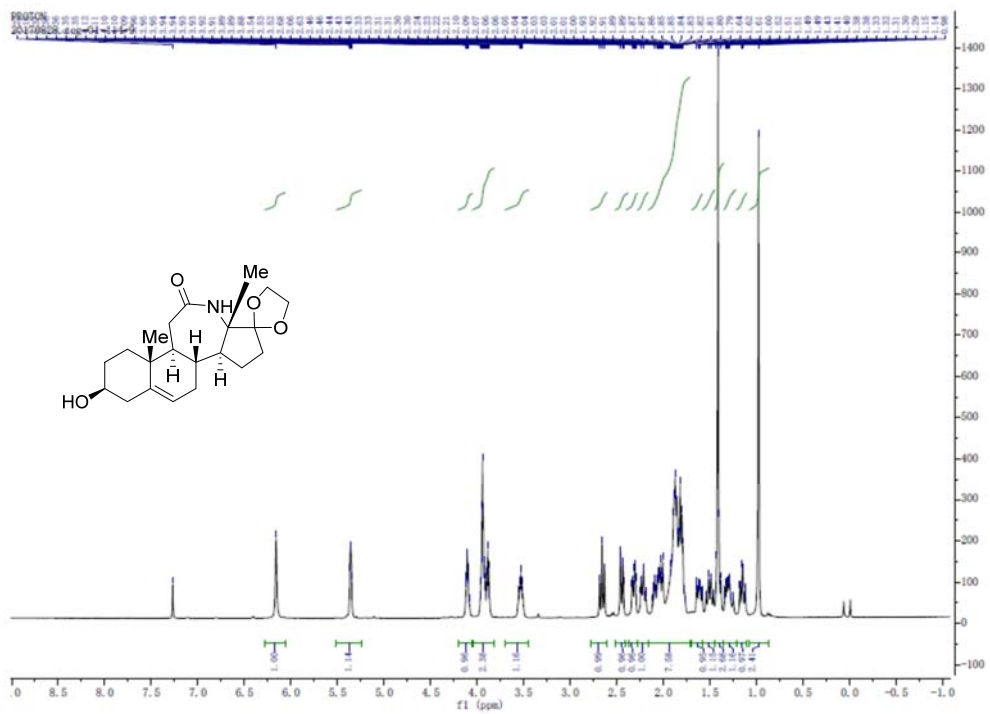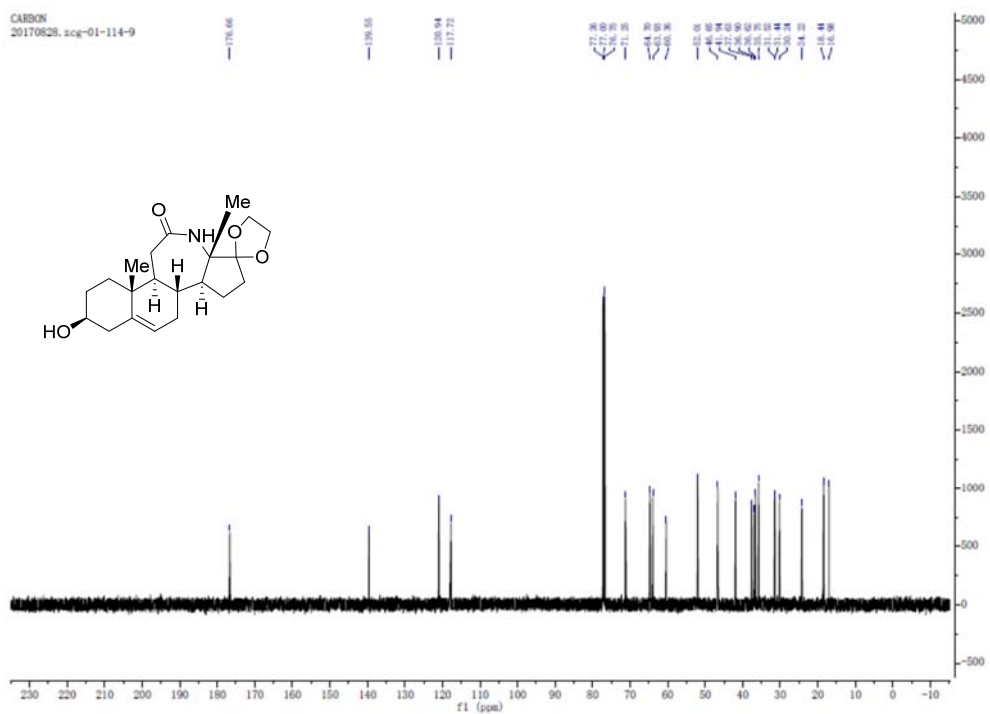

Supplementary Figure 78.  $^1\text{H}$  and  $^{13}\text{C}$  spectra of 27b.

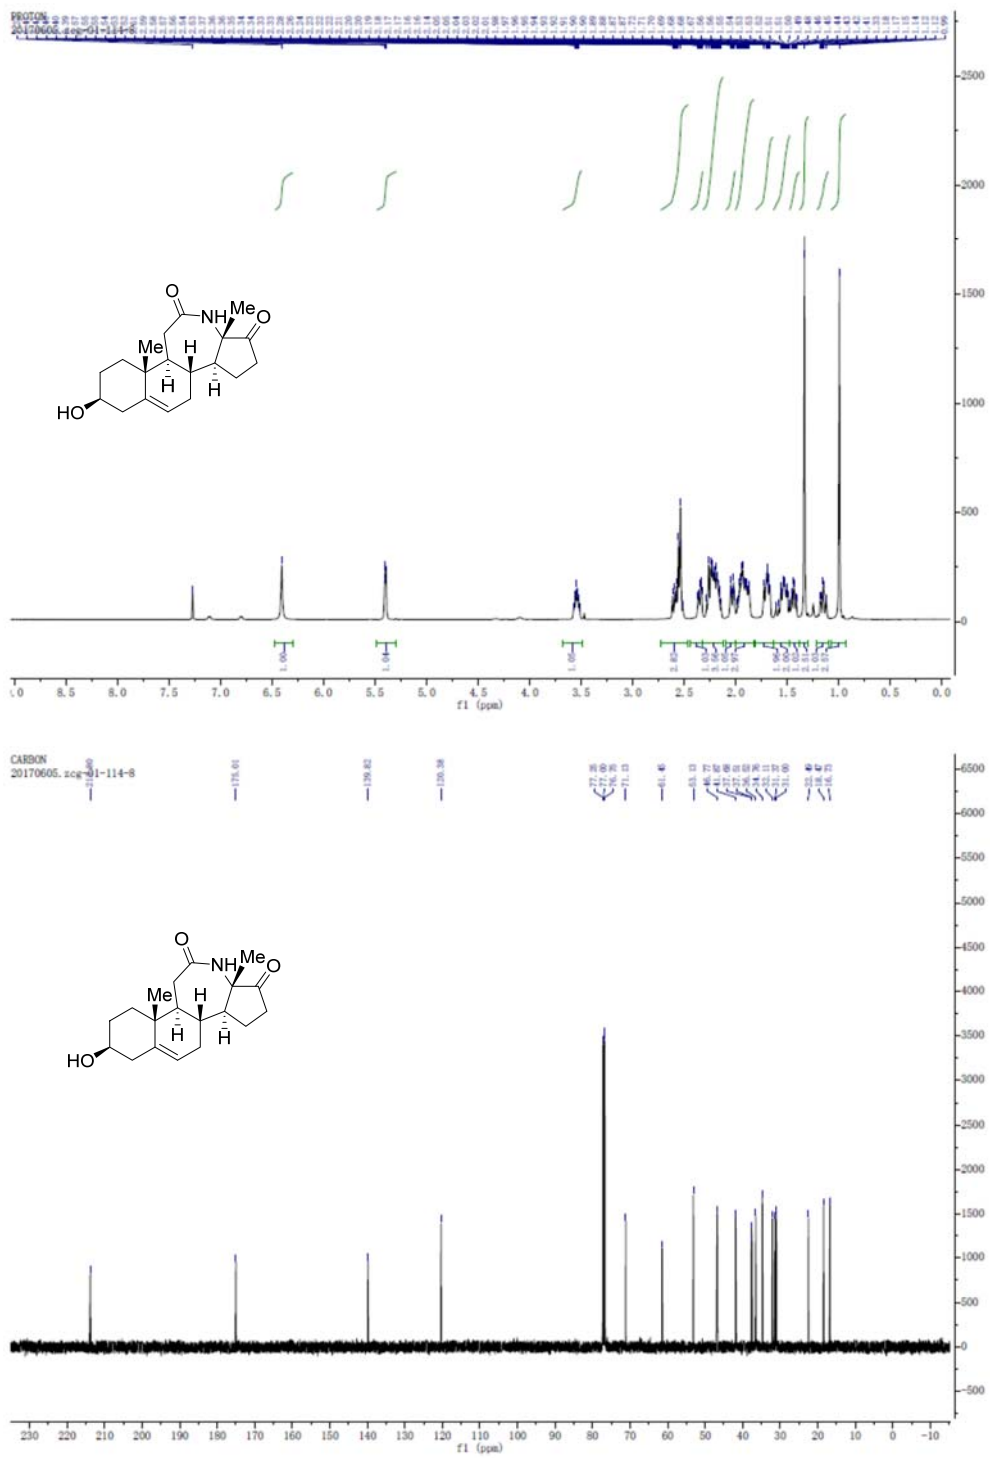

Supplementary Figure 79.  $^1\text{H}$  and  $^{13}\text{C}$  spectra of 27c.

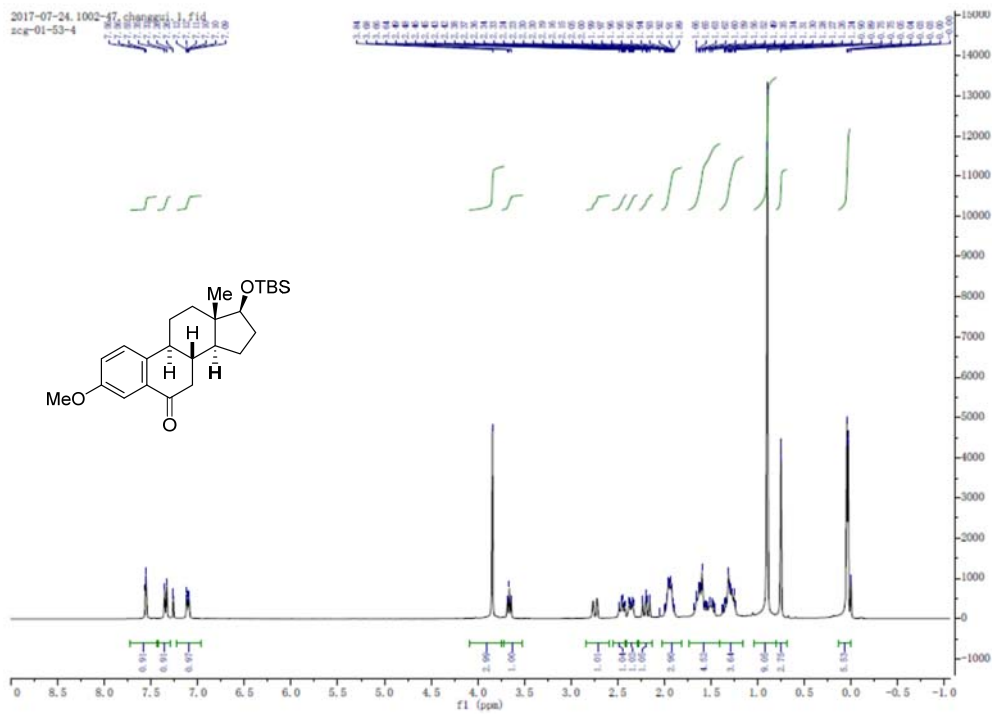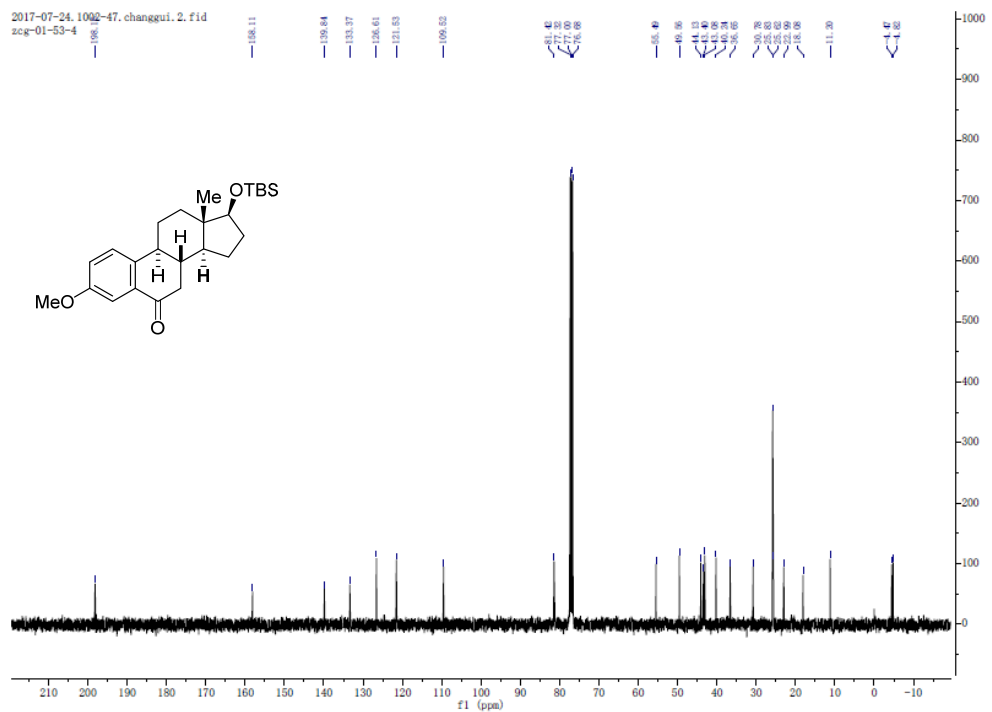

Supplementary Figure 80.  $^1\text{H}$  and  $^{13}\text{C}$  spectra of 28.

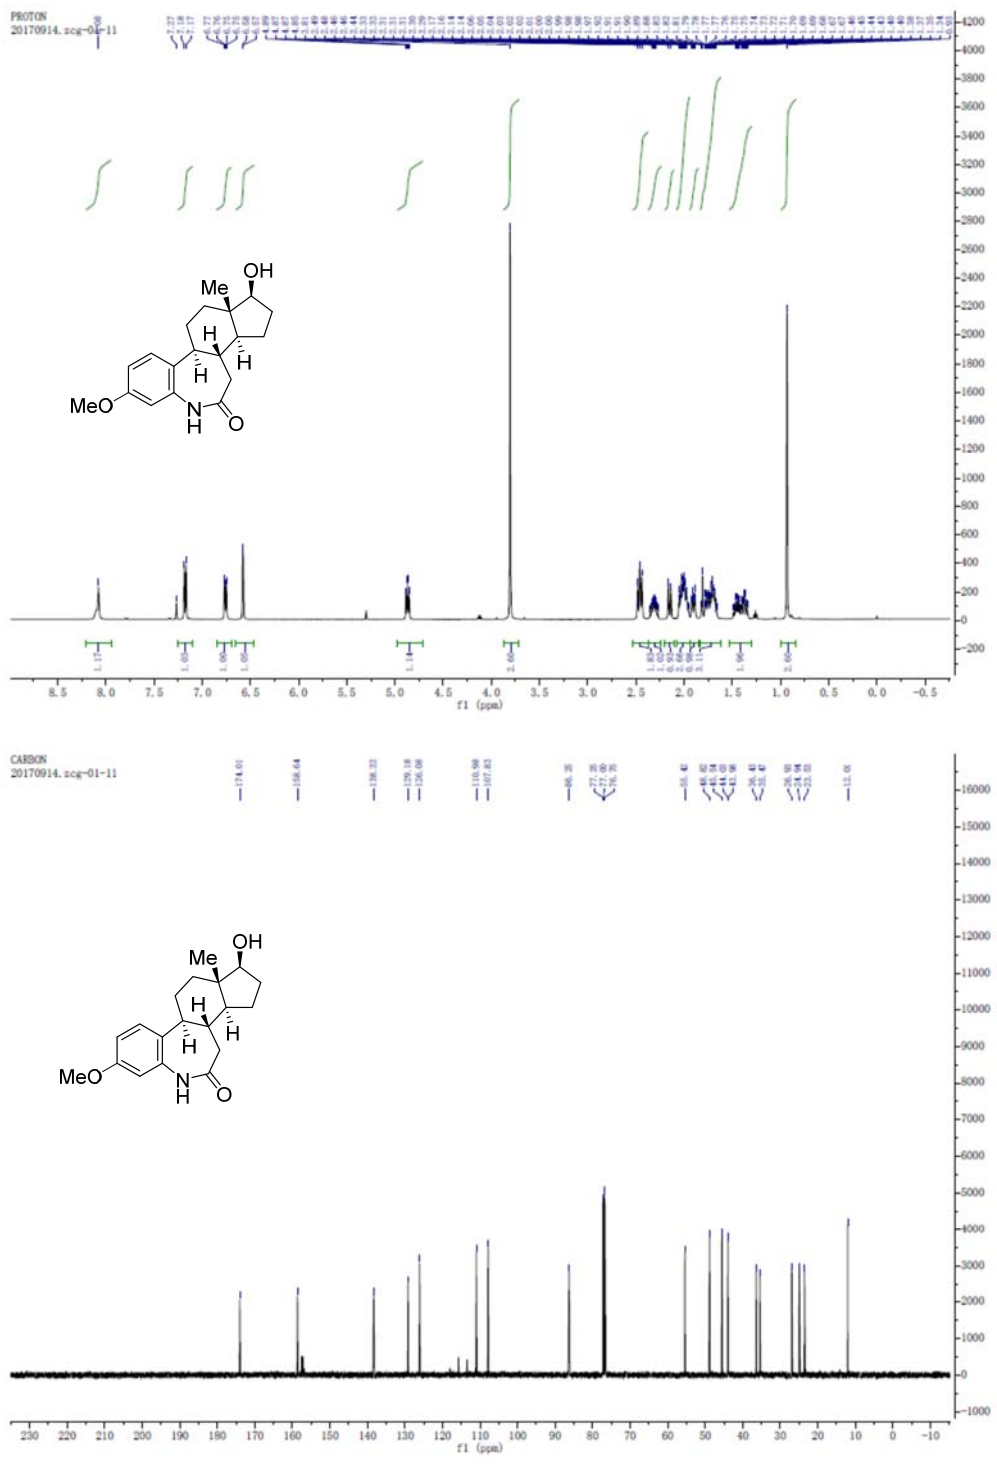

Supplementary Figure 81.  $^1\text{H}$  and  $^{13}\text{C}$  spectra of 29.

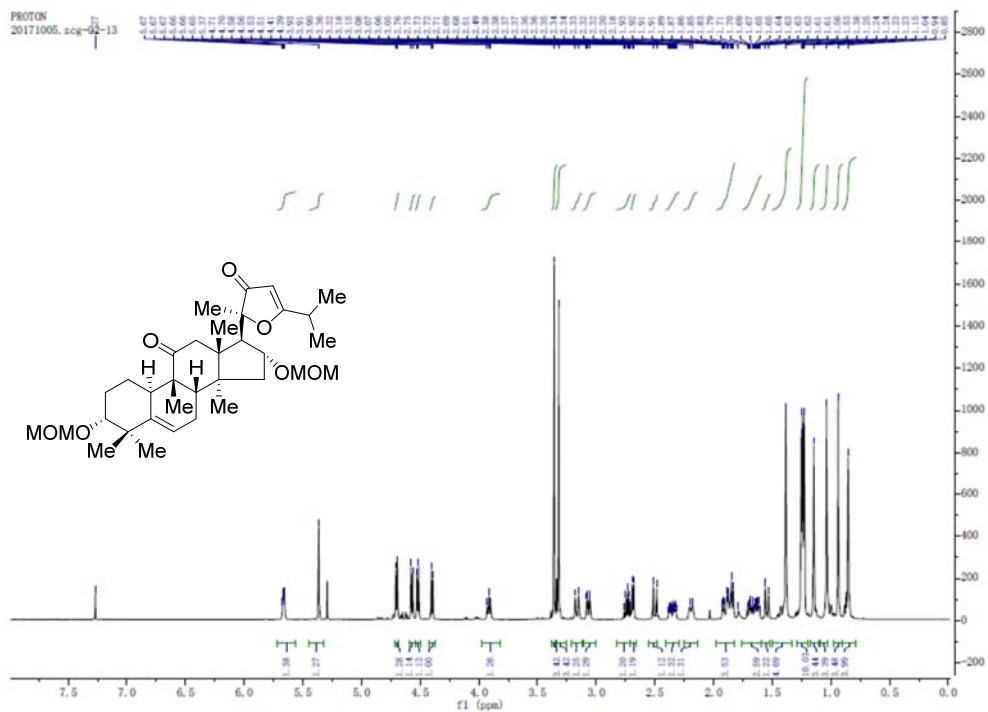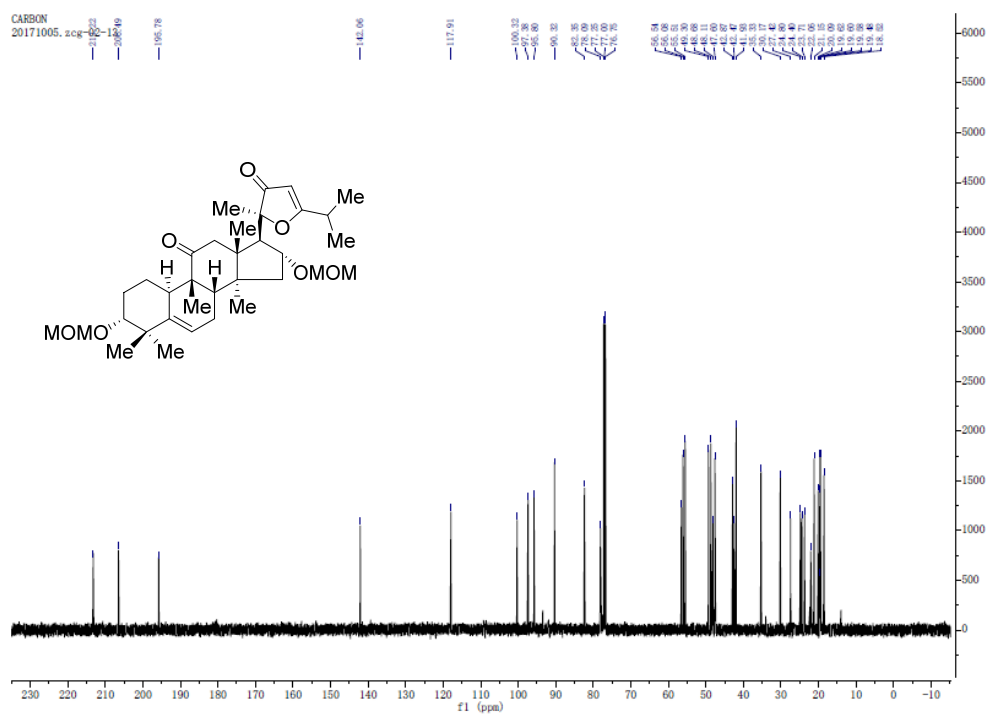

Supplementary Figure 82.  $^1\text{H}$  and  $^{13}\text{C}$  spectra of 31.

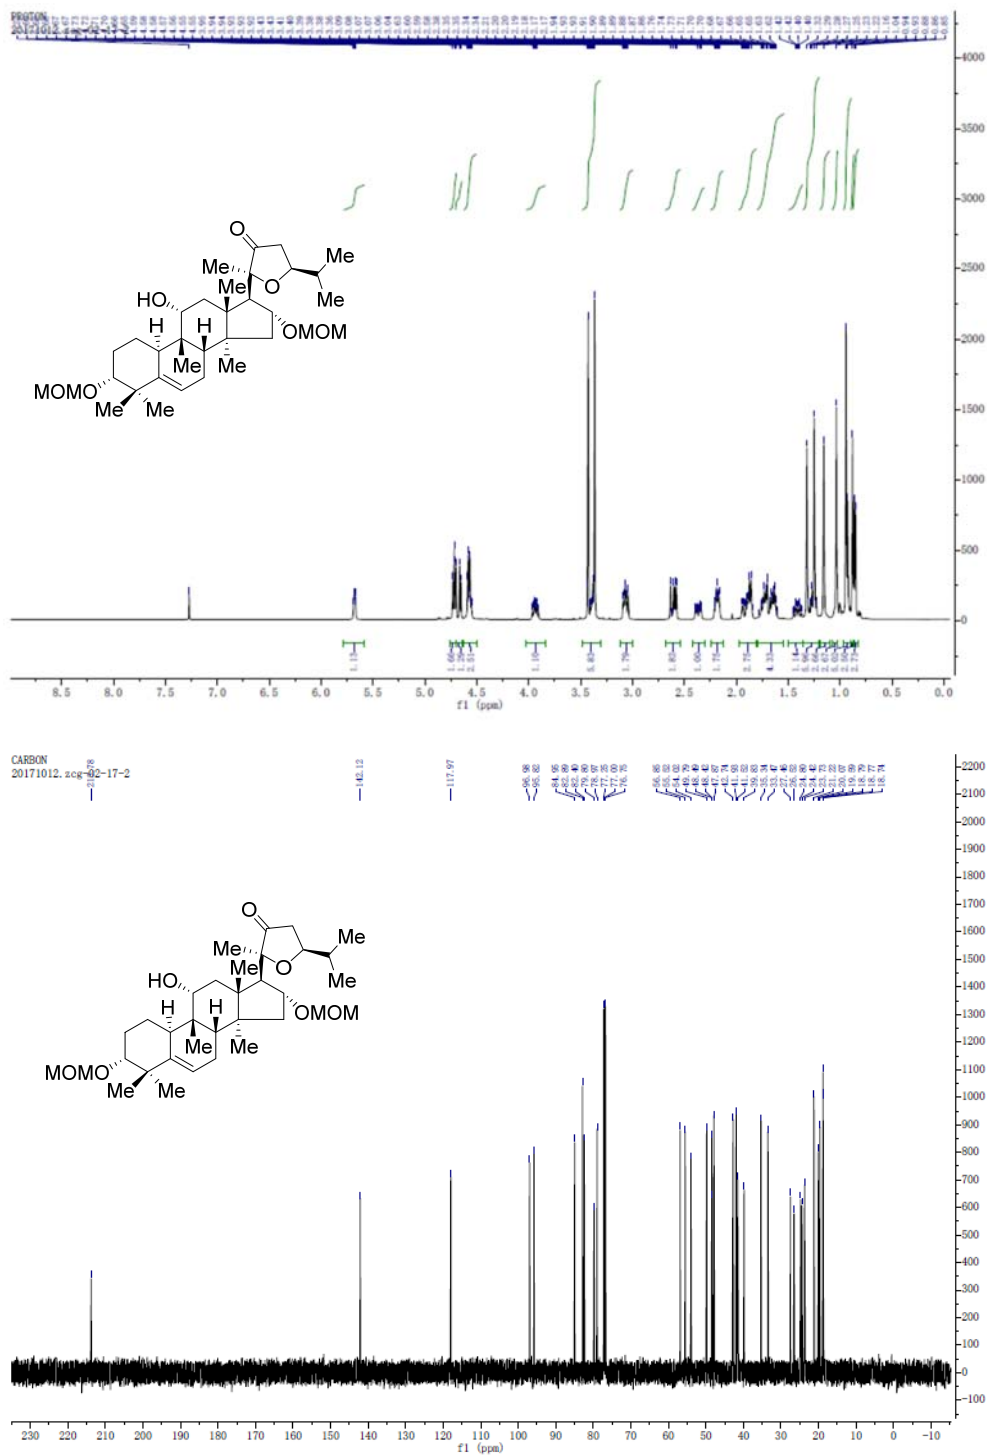

Supplementary Figure 83.  $^1\text{H}$  and  $^{13}\text{C}$  spectra of 32.

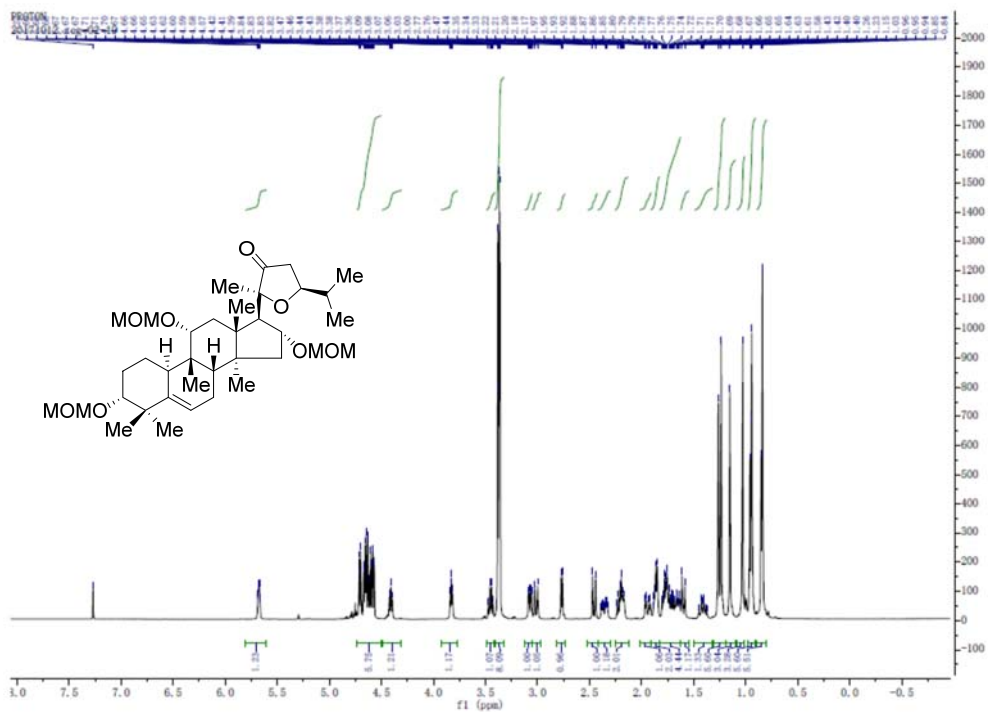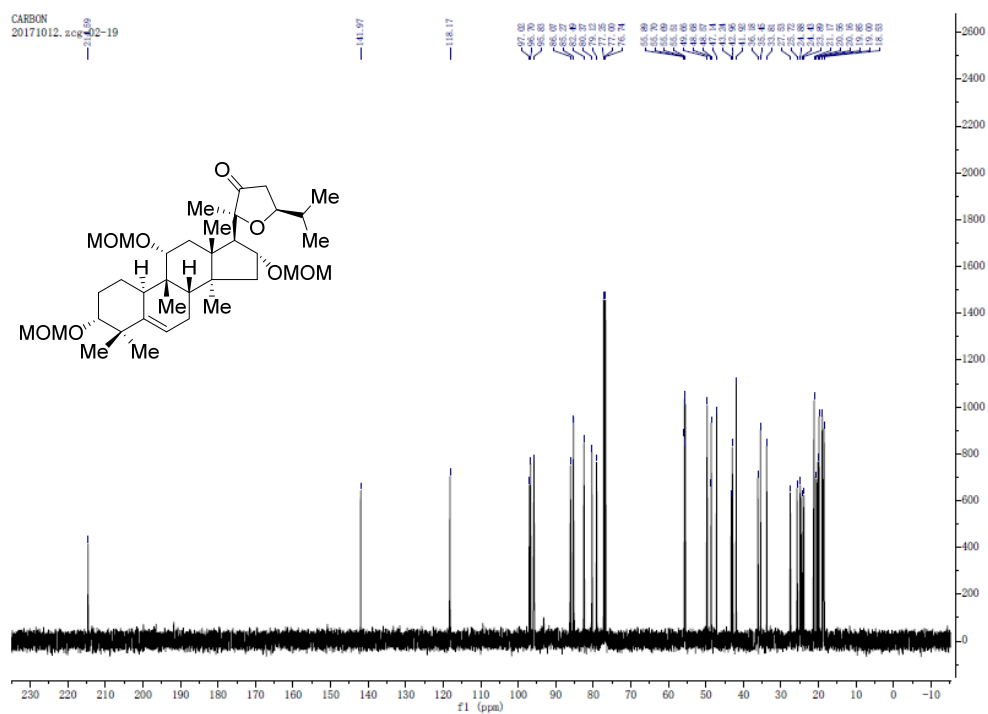

Supplementary Figure 84. <sup>1</sup>H and <sup>13</sup>C spectra of S13.

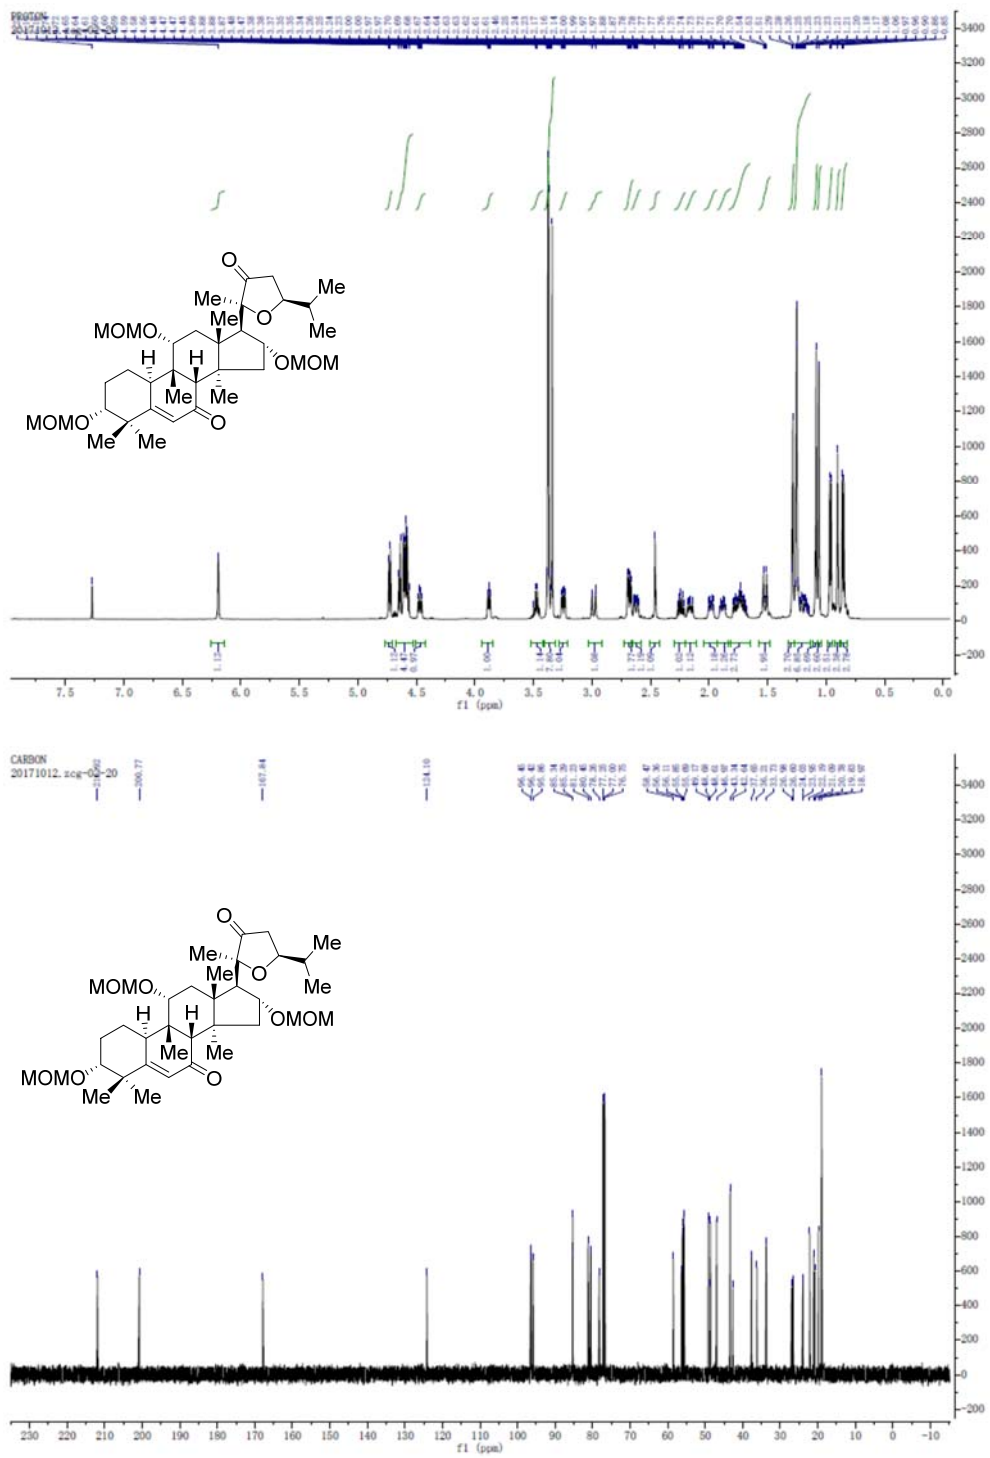

Supplementary Figure 85.  $^1\text{H}$  and  $^{13}\text{C}$  spectra of 33.



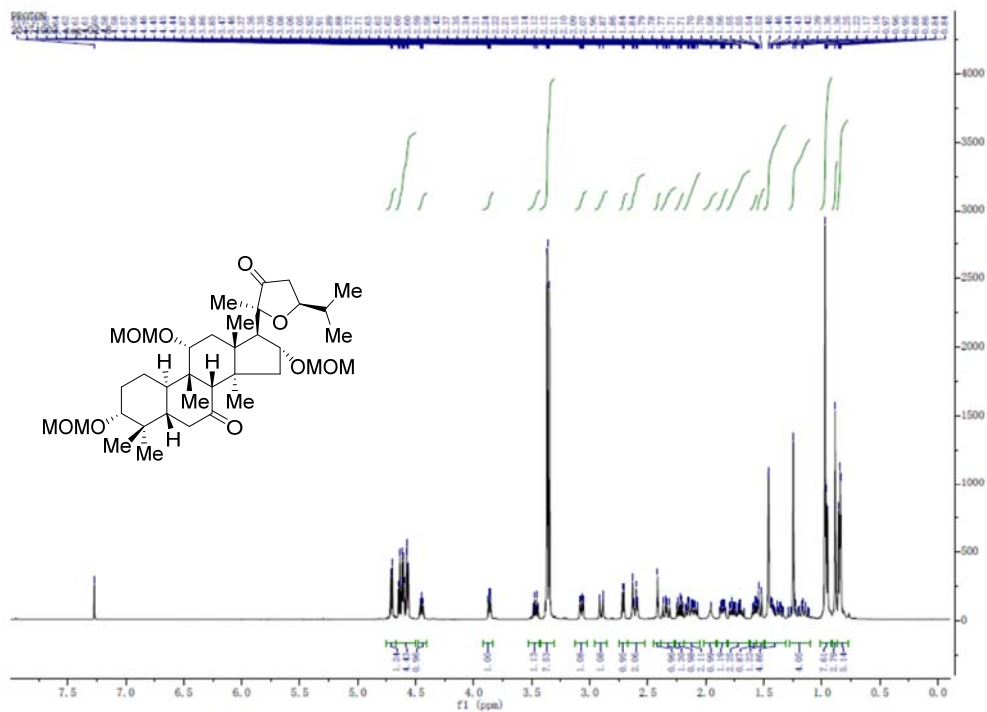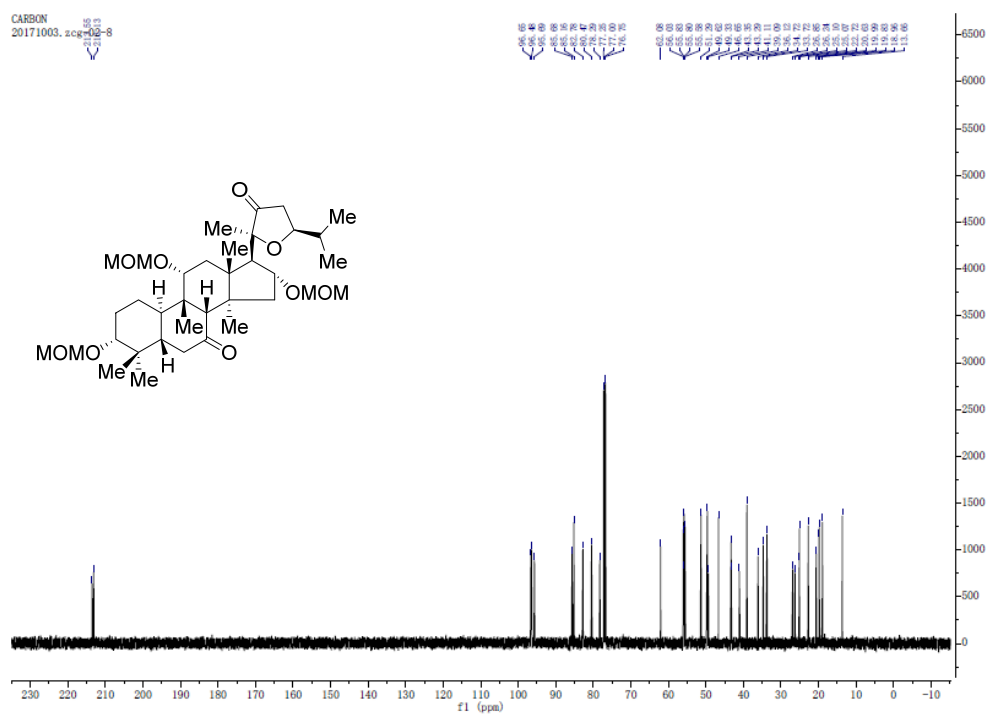

Supplementary Figure 86.  $^1\text{H}$  and  $^{13}\text{C}$  spectra of 34.

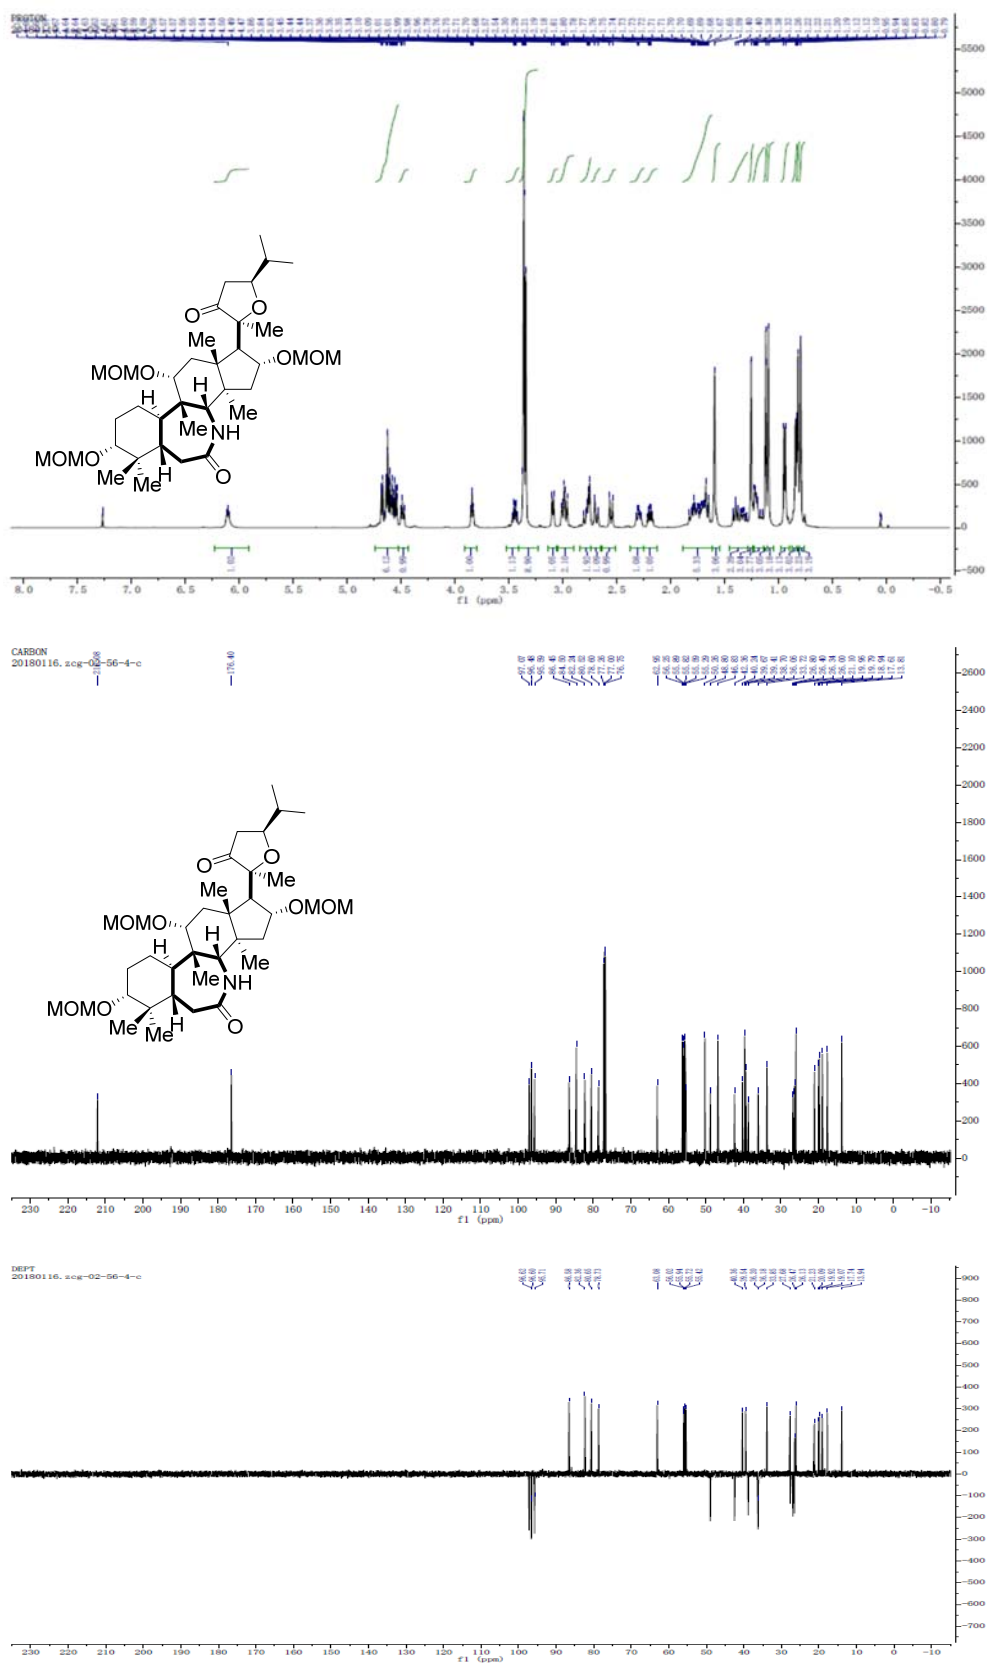

Supplementary Figure 87. <sup>1</sup>H, <sup>13</sup>C and DPET135 spectra of 35.

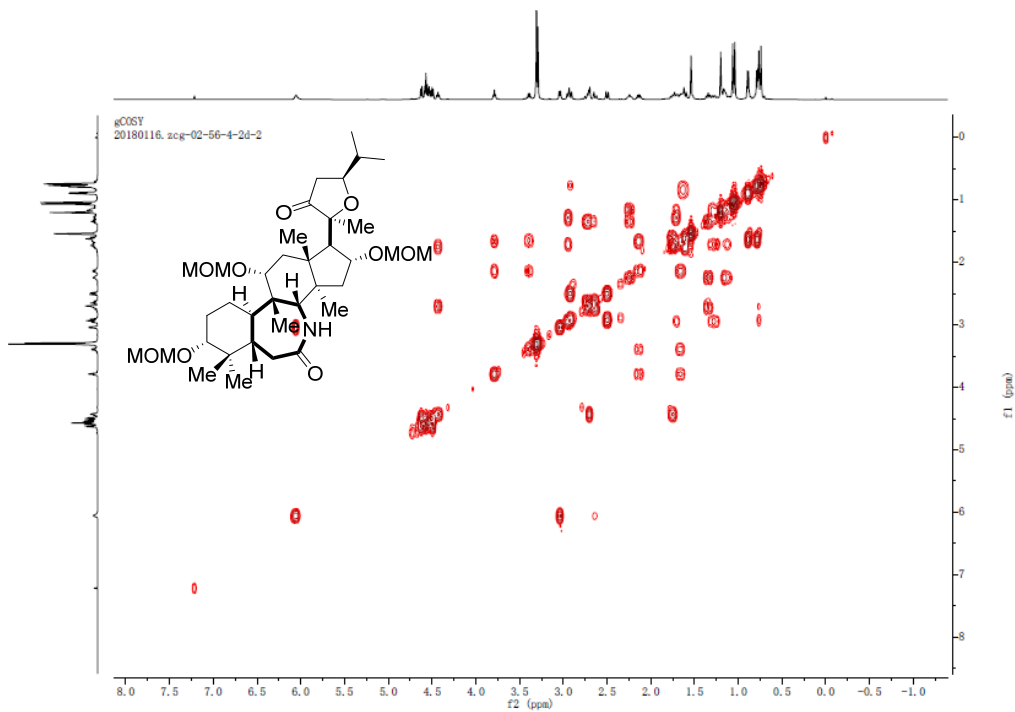

Supplementary Figure 88. <sup>1</sup>H-<sup>1</sup>H COSY spectra of 35.

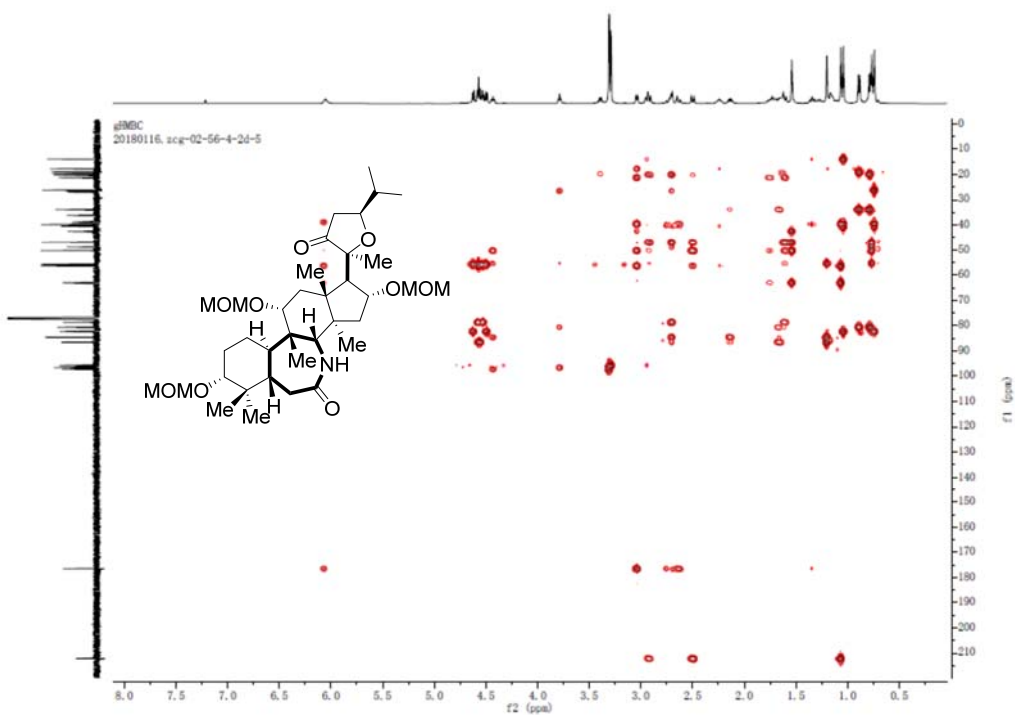

Supplementary Figure 89. HMBC spectra of 35.

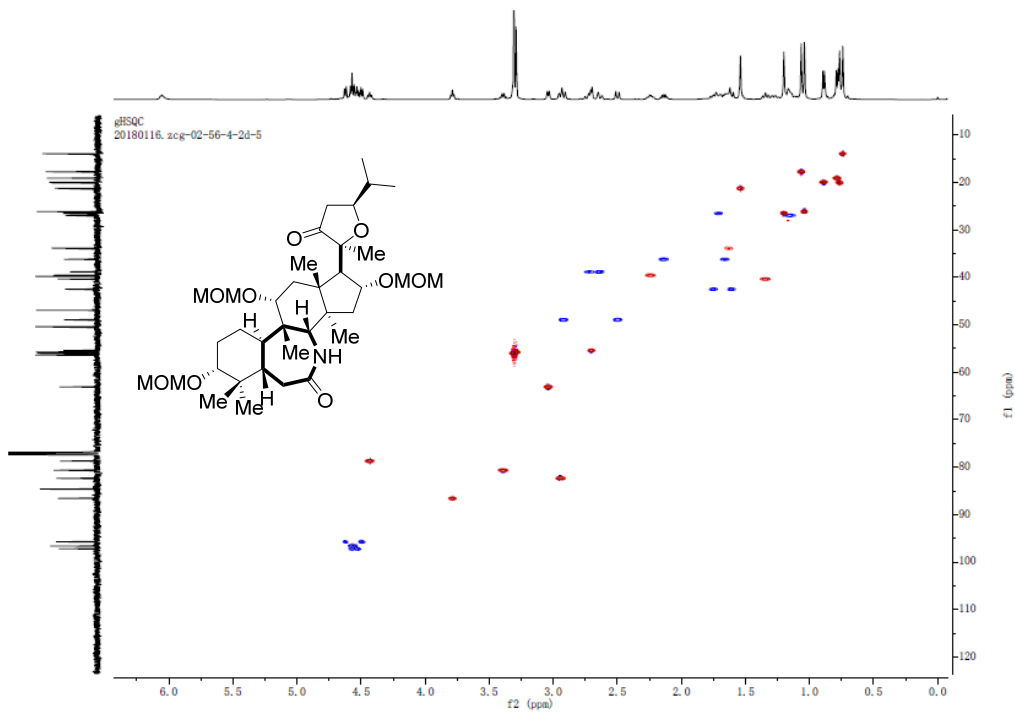

Supplementary Figure 90. HSQC of 35.

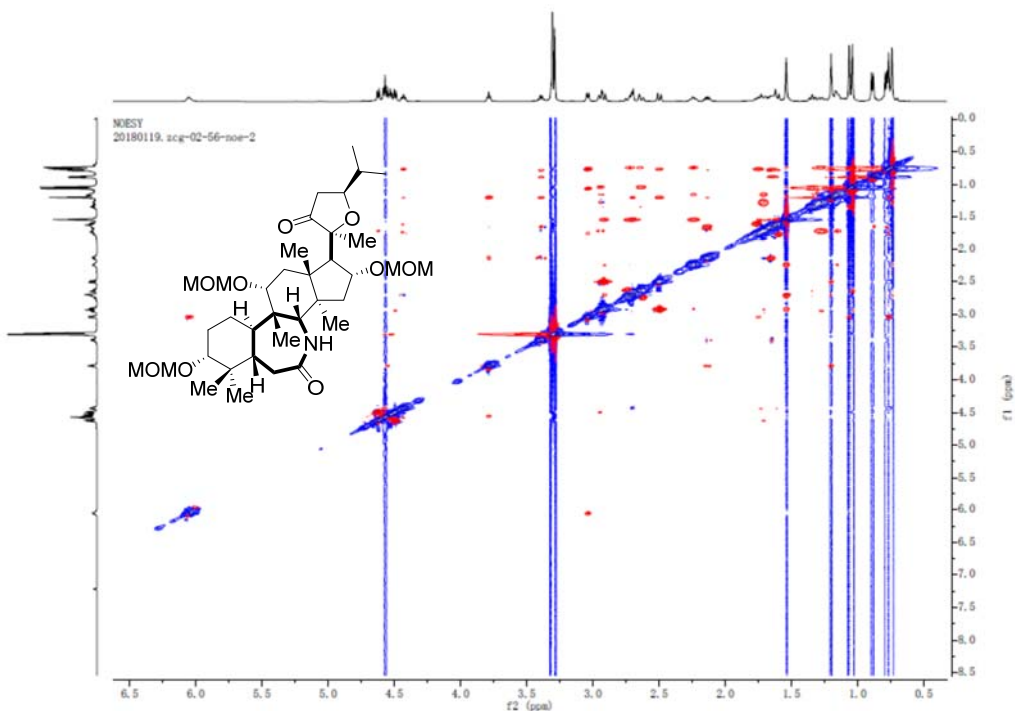

Supplementary Figure 91. NOESY spectra of 35.

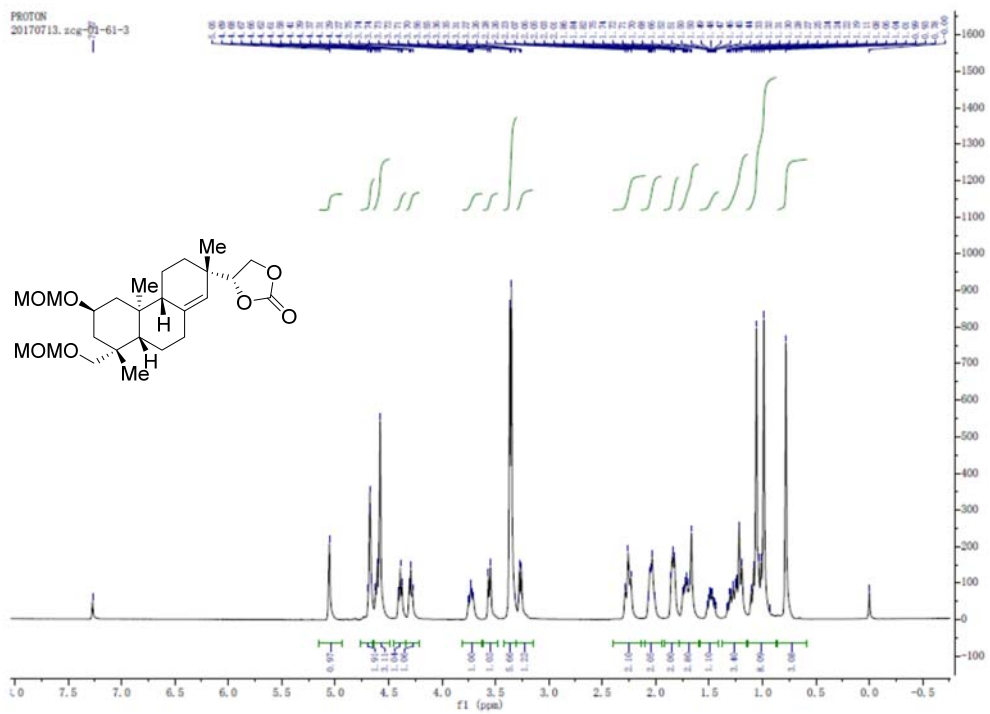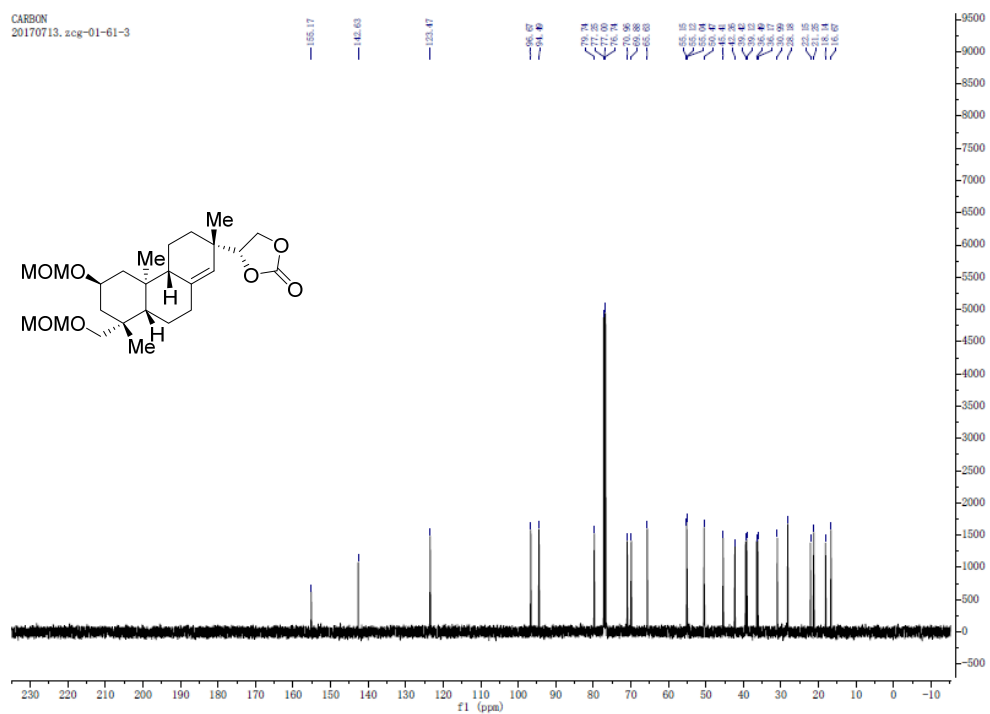

Supplementary Figure 92. <sup>1</sup>H and <sup>13</sup>C spectra of 37.

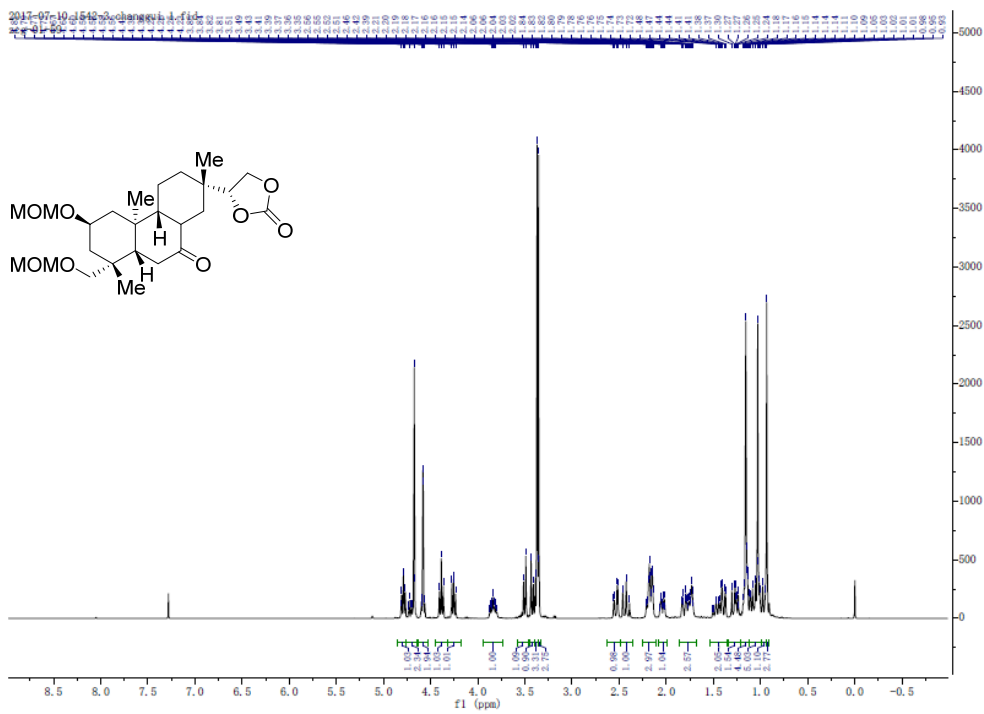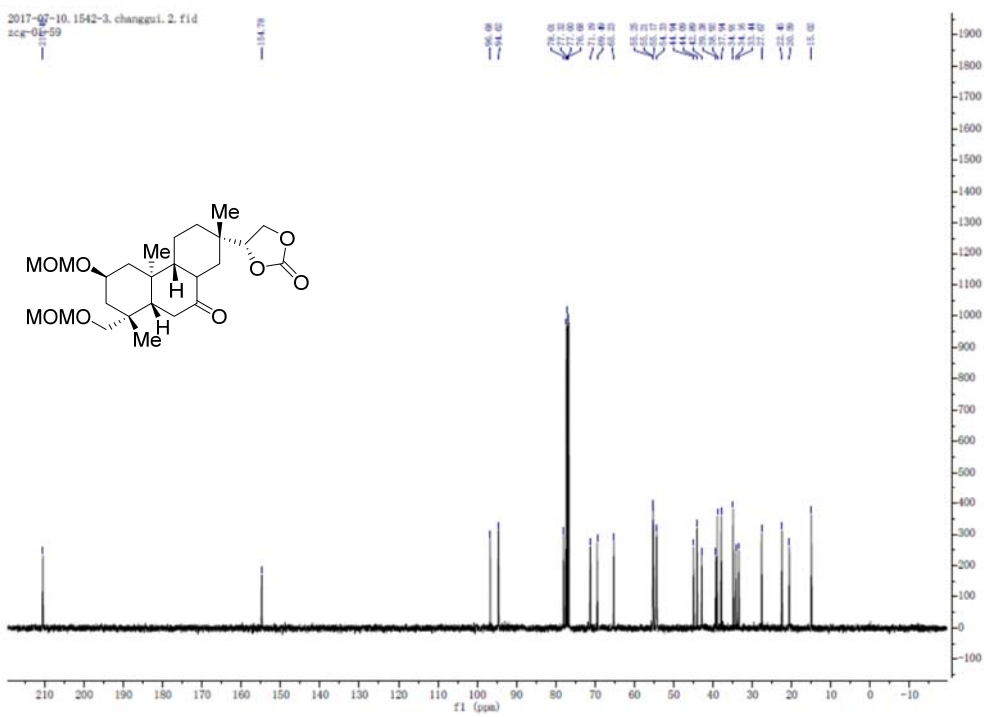

Supplementary Figure 93.  $^1\text{H}$  and  $^{13}\text{C}$  spectra of 38.

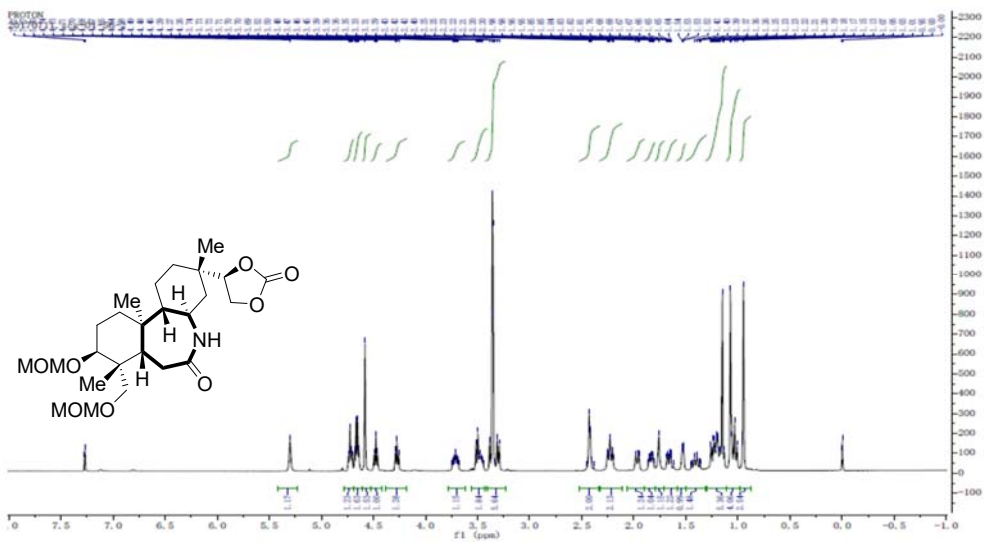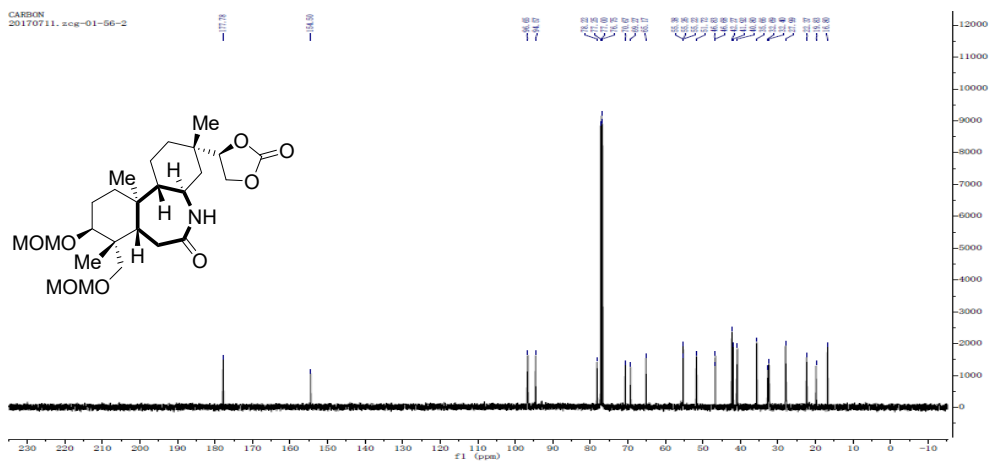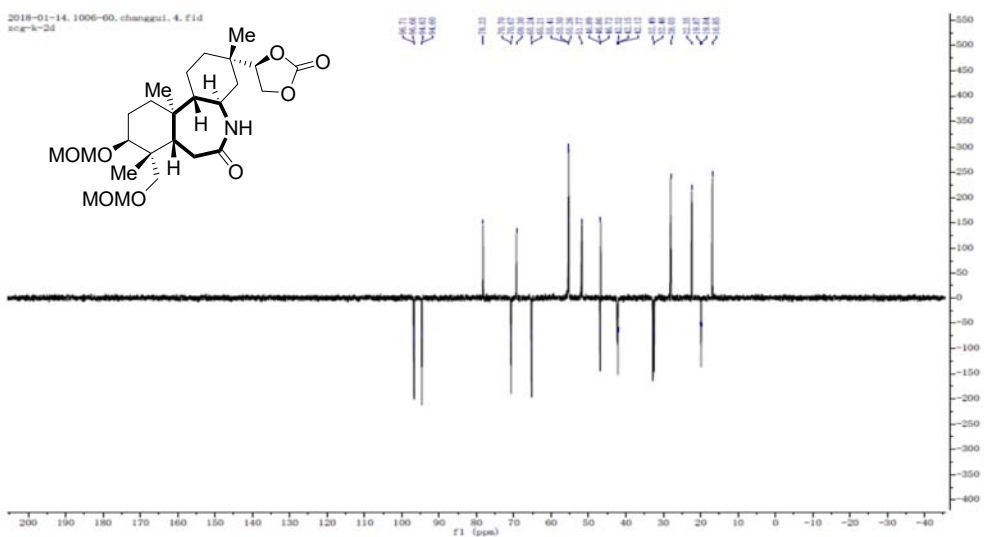

Supplementary Figure 94.  $^1\text{H}$ ,  $^{13}\text{C}$  and DEPT135 spectra of 39.

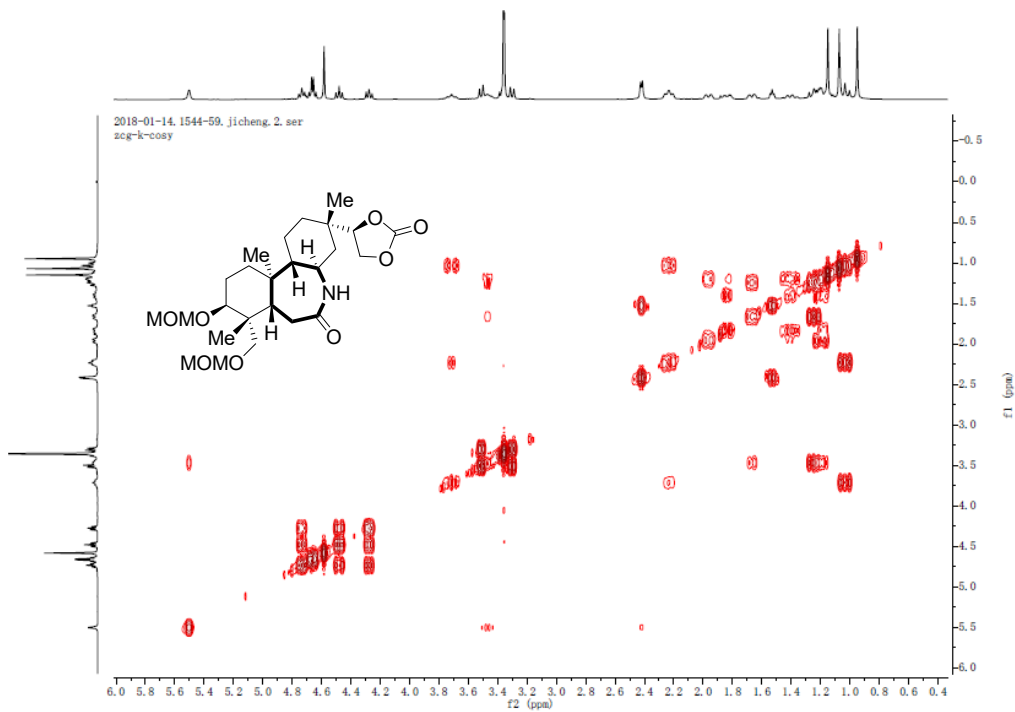

Supplementary Figure 95. H-H Cosy spectra of 39.

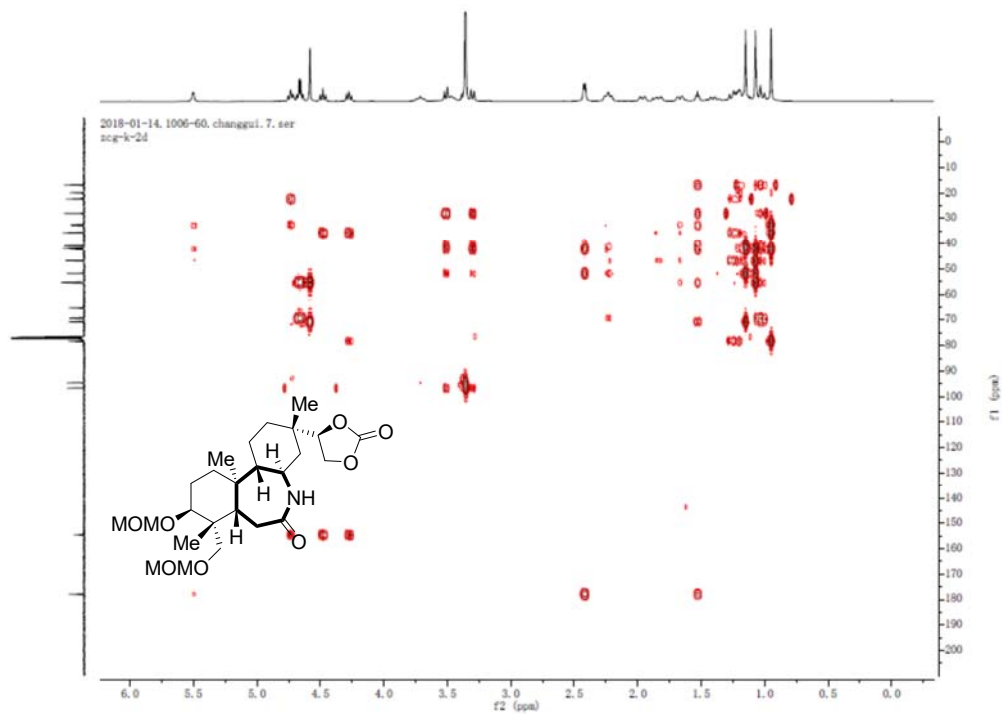

Supplementary Figure 96. HMBC spectra of 39.



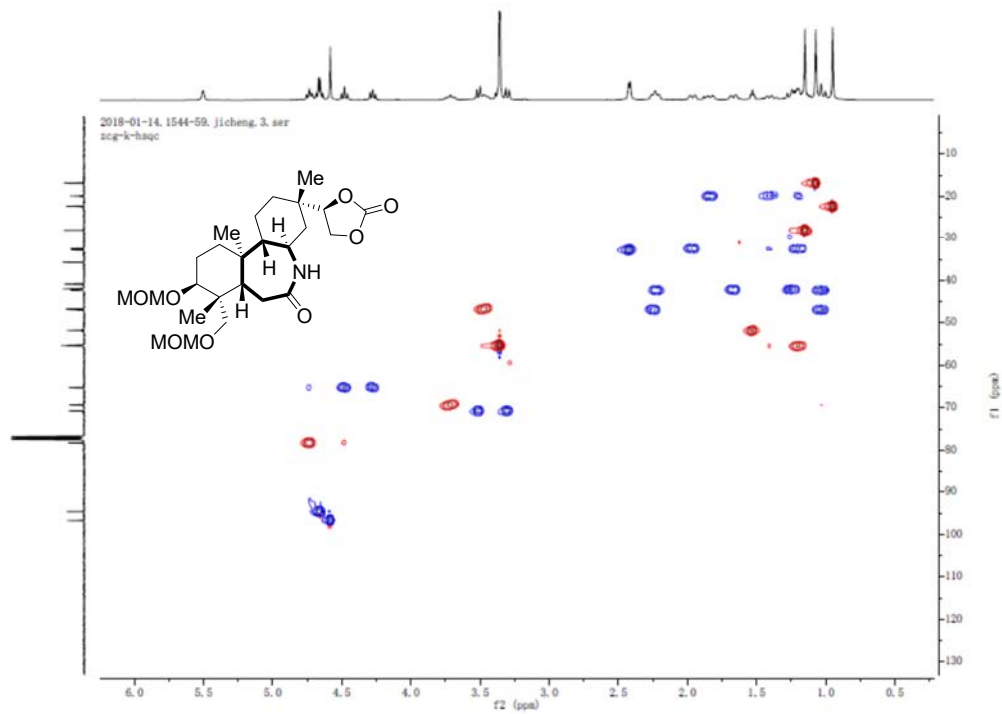

Supplementary Figure 97. HSQC spectra of 39.

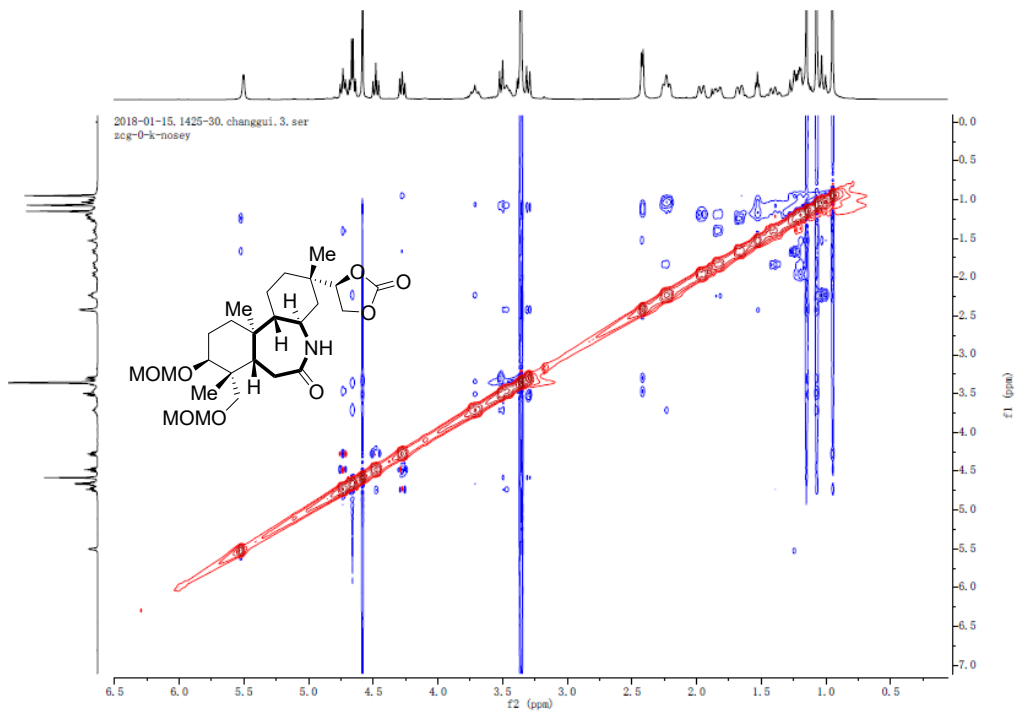

Supplementary Figure 98. NOESY spectra of 39.

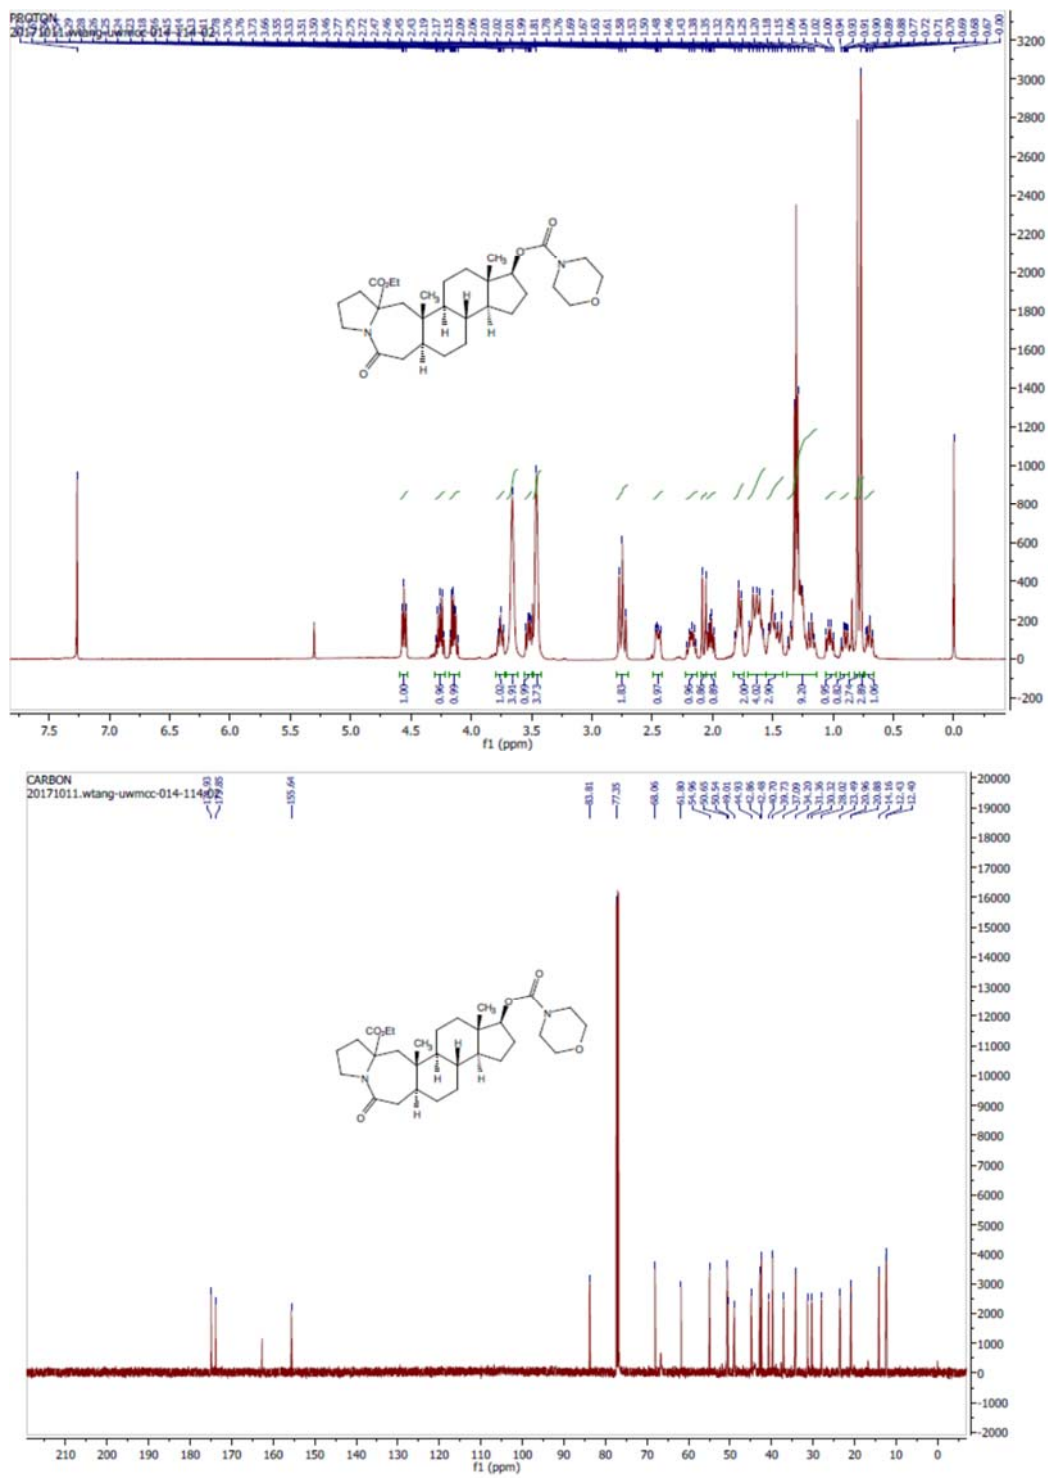

Supplementary Figure 99.  $^1\text{H}$  and  $^{13}\text{C}$  spectra of 40a.

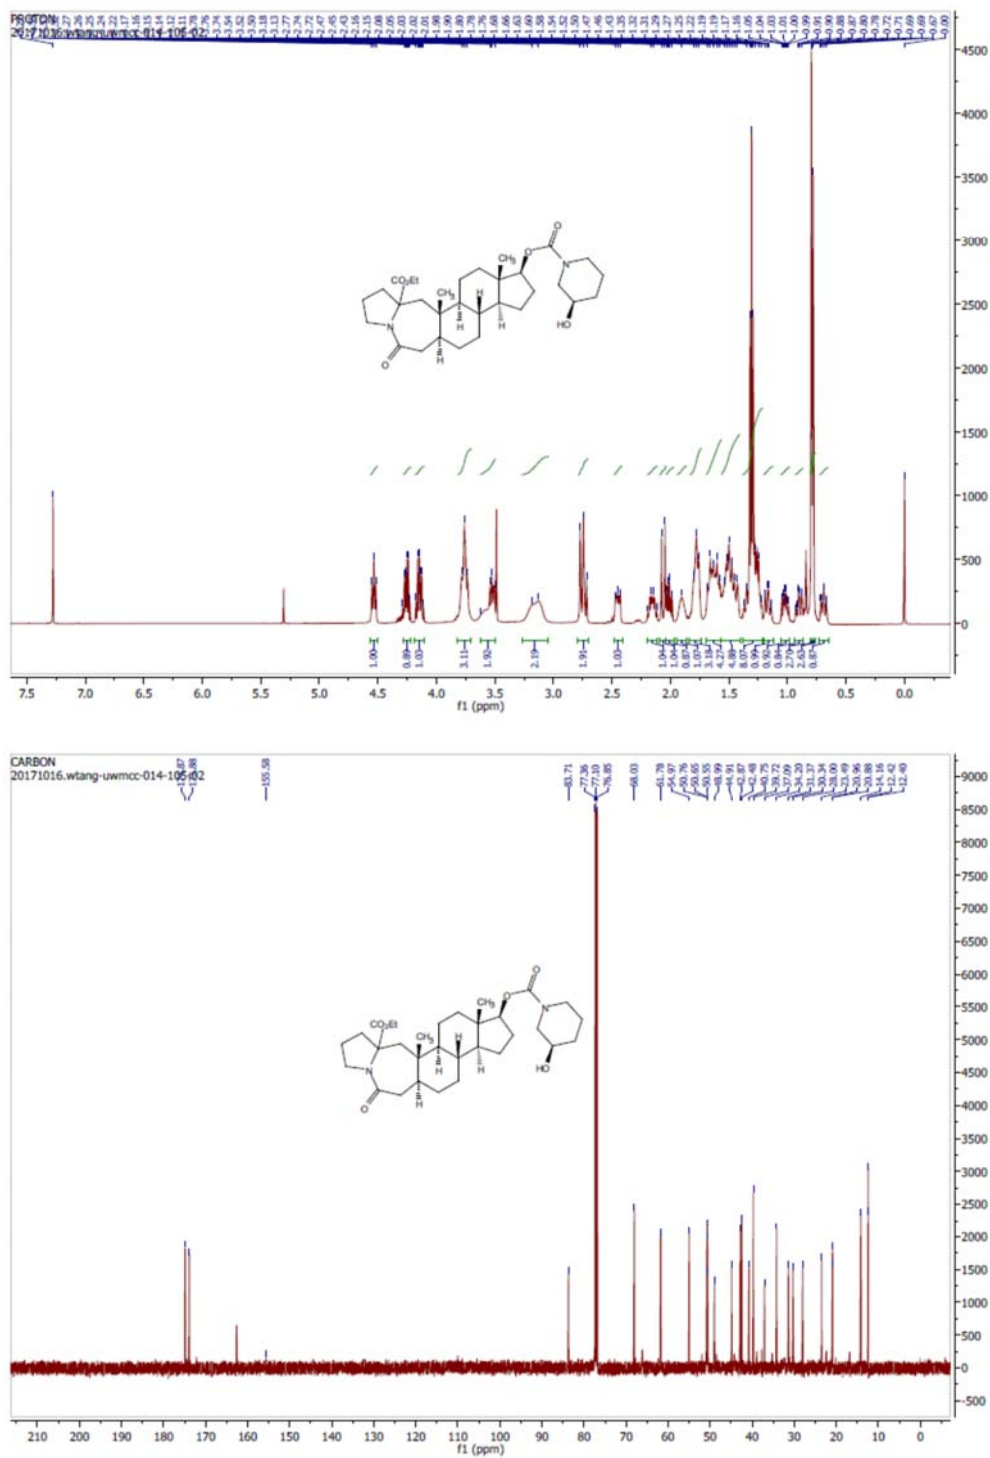

Supplementary Figure 100. <sup>1</sup>H and <sup>13</sup>C spectra of 40b.

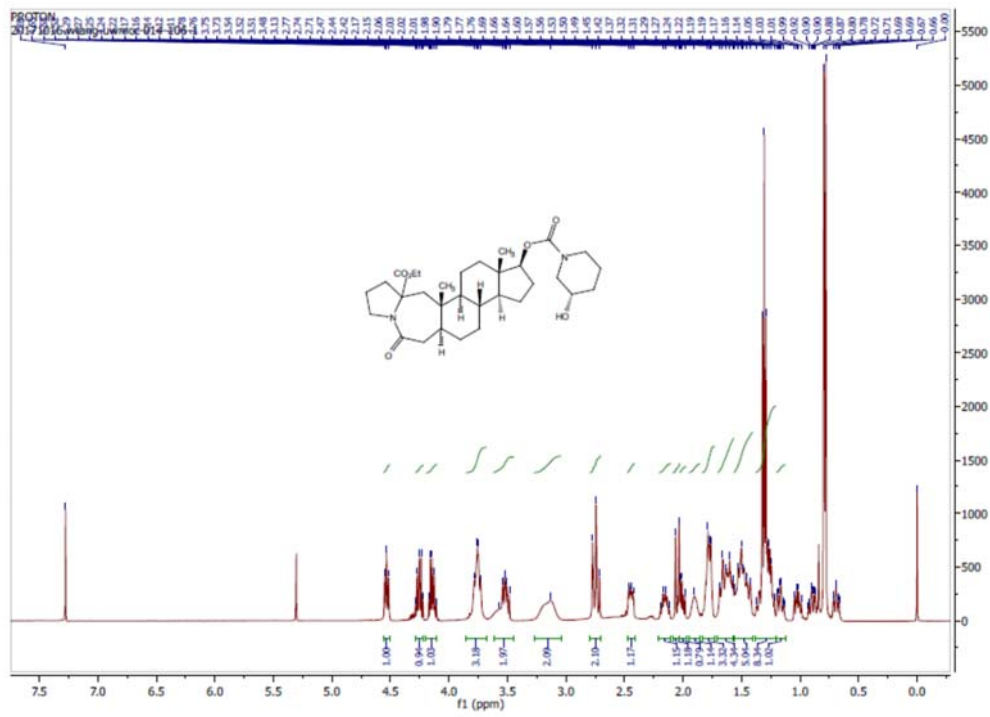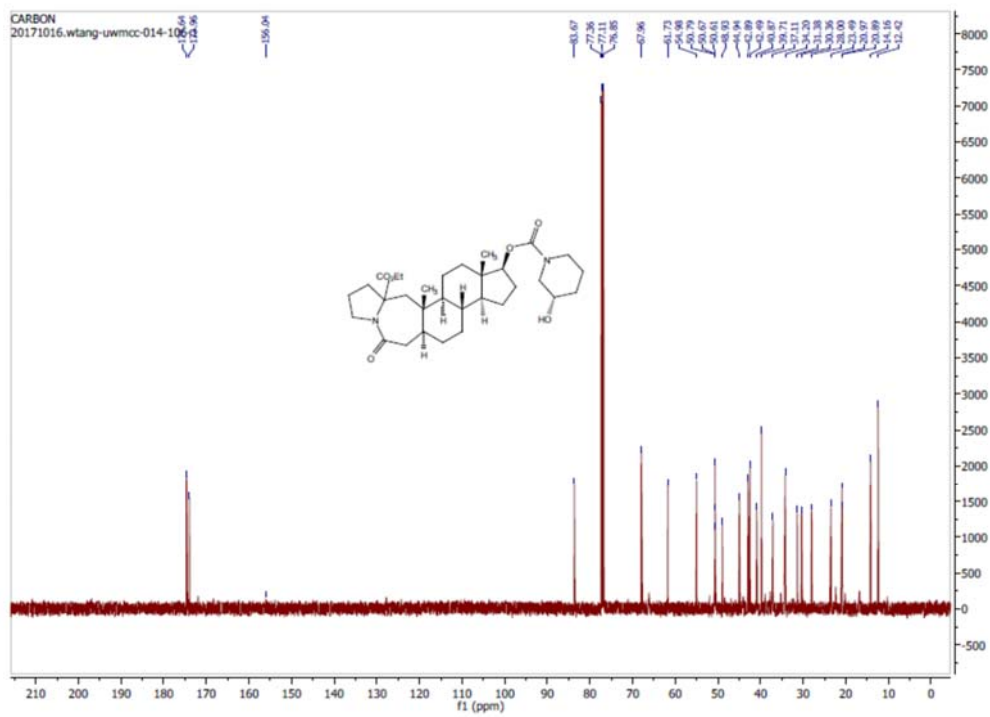

Supplementary Figure 101. <sup>1</sup>H and <sup>13</sup>C spectra of 40c.



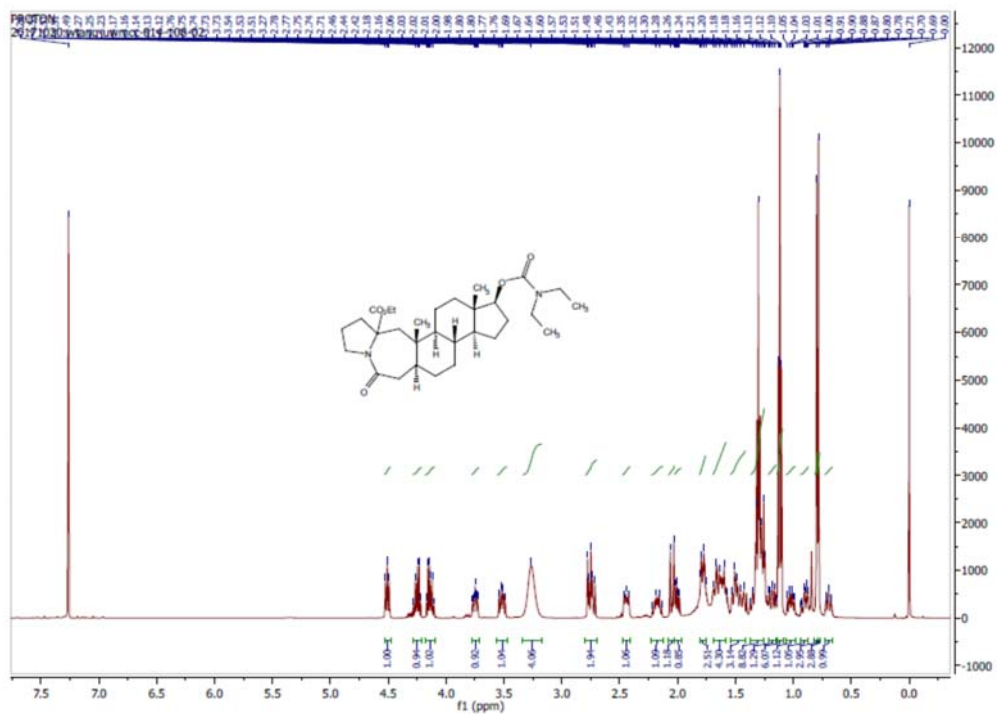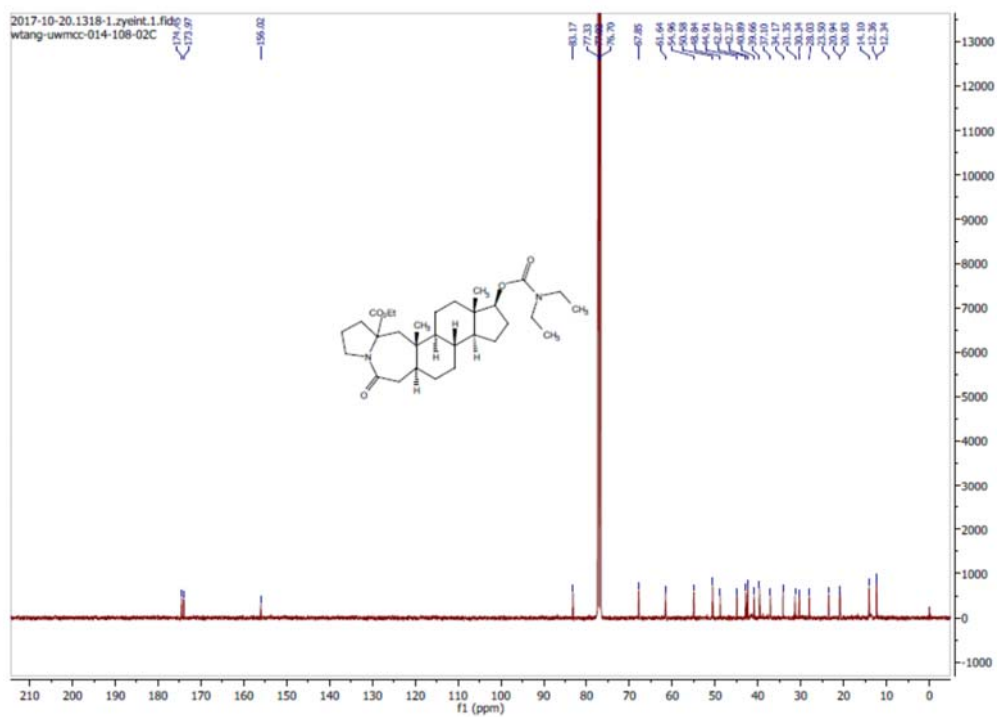

Supplementary Figure 103. <sup>1</sup>H and <sup>13</sup>C spectra of 40e.

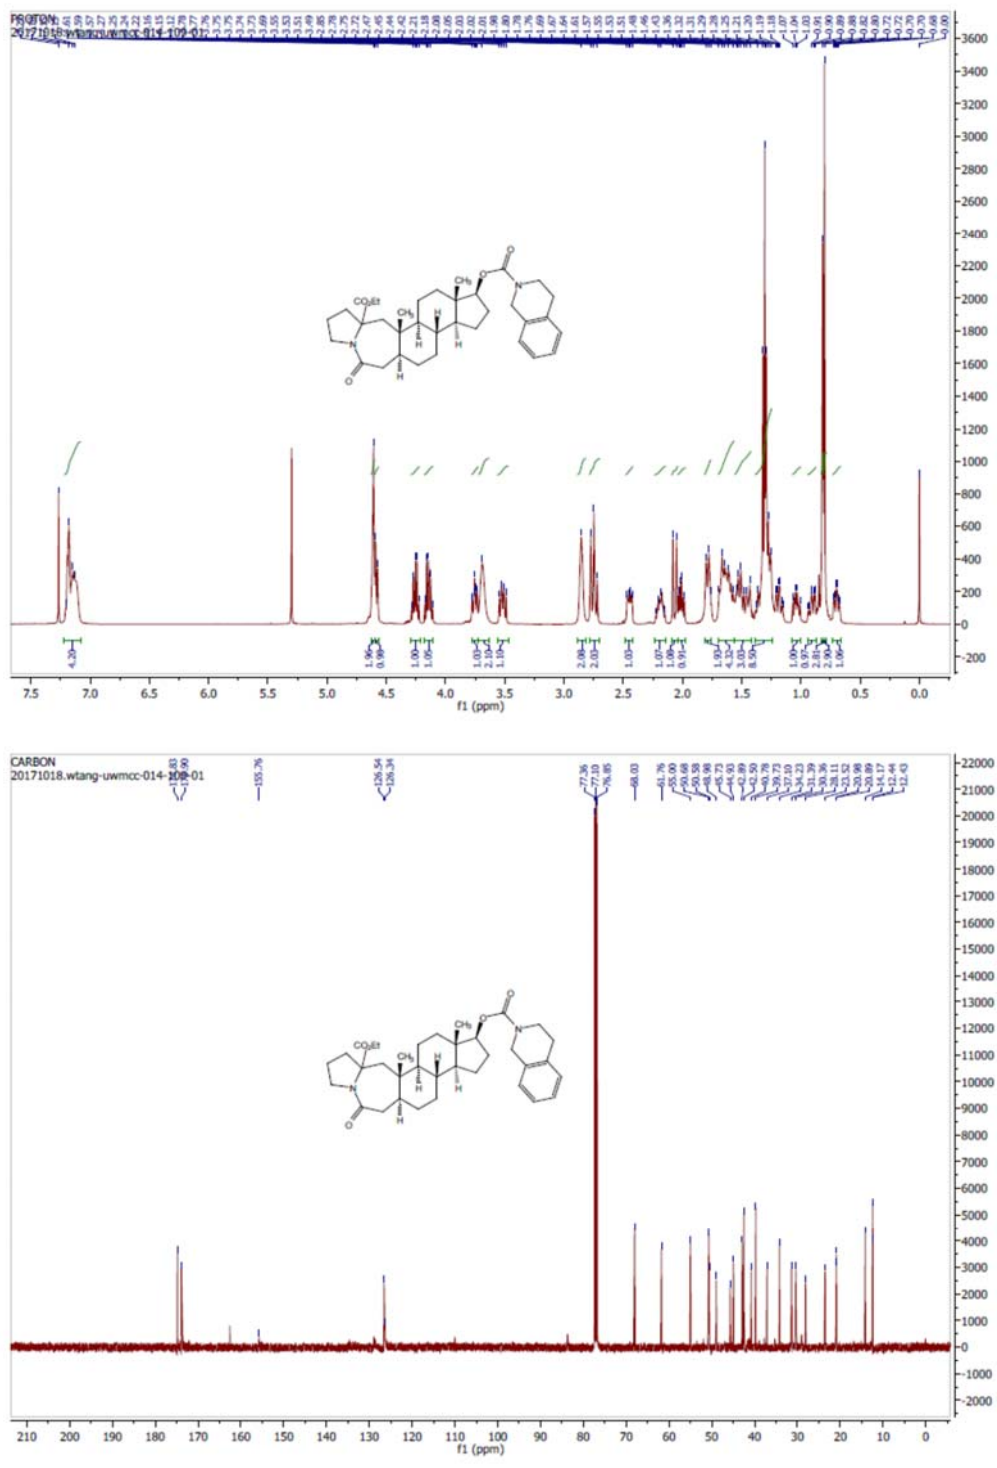

Supplementary Figure 104. <sup>1</sup>H and <sup>13</sup>C spectra of 40f.

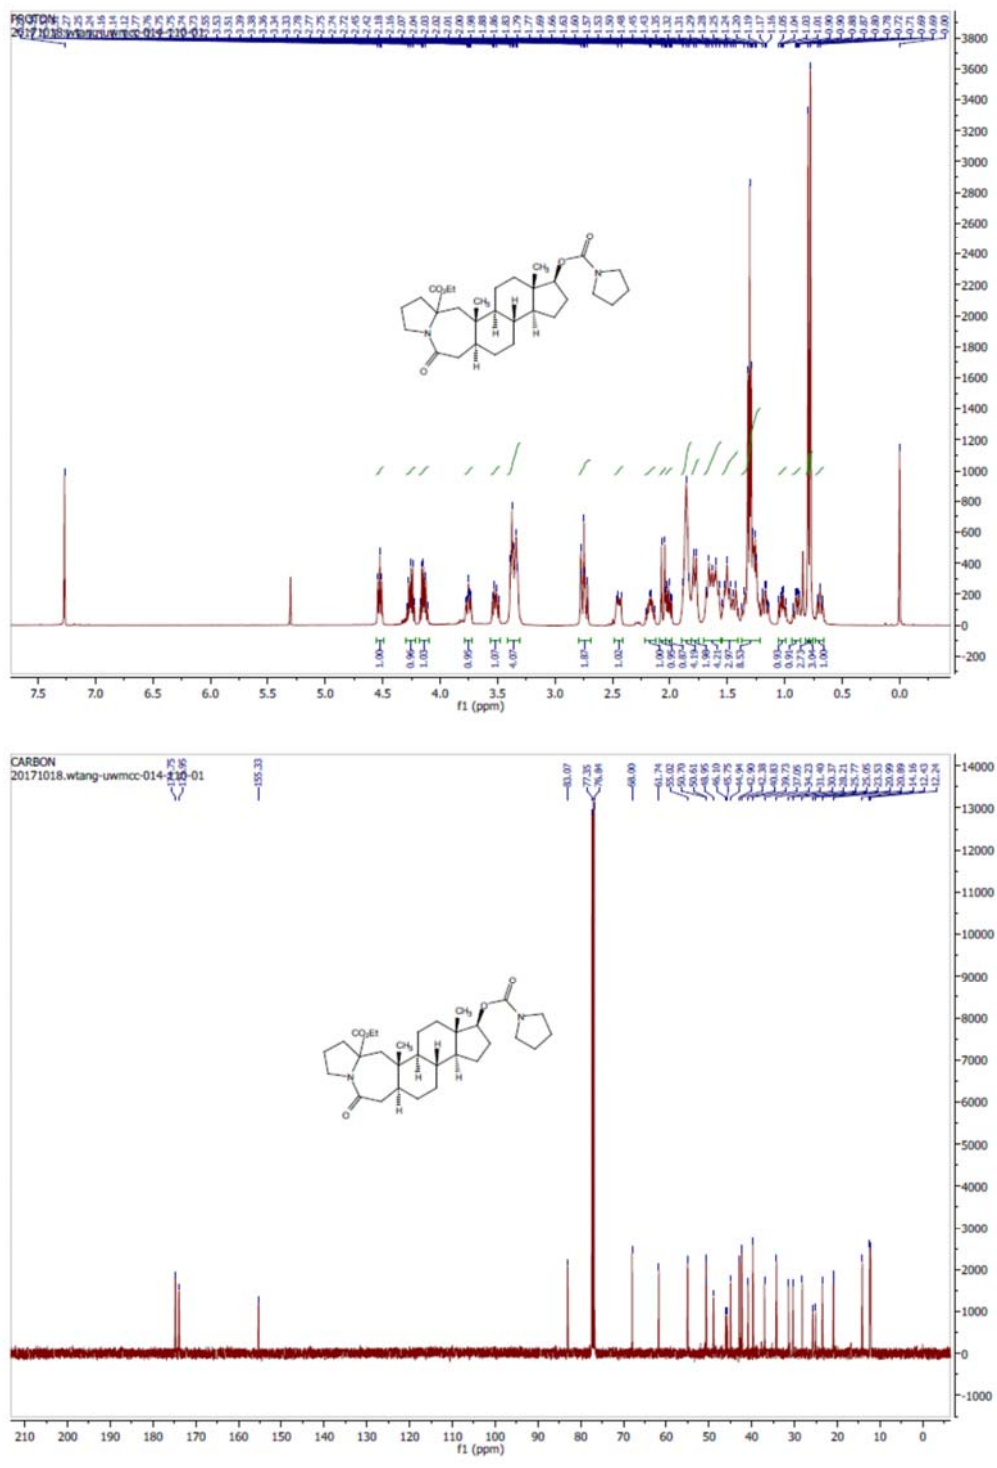

Supplementary Figure 105. <sup>1</sup>H and <sup>13</sup>C spectra of 40g.



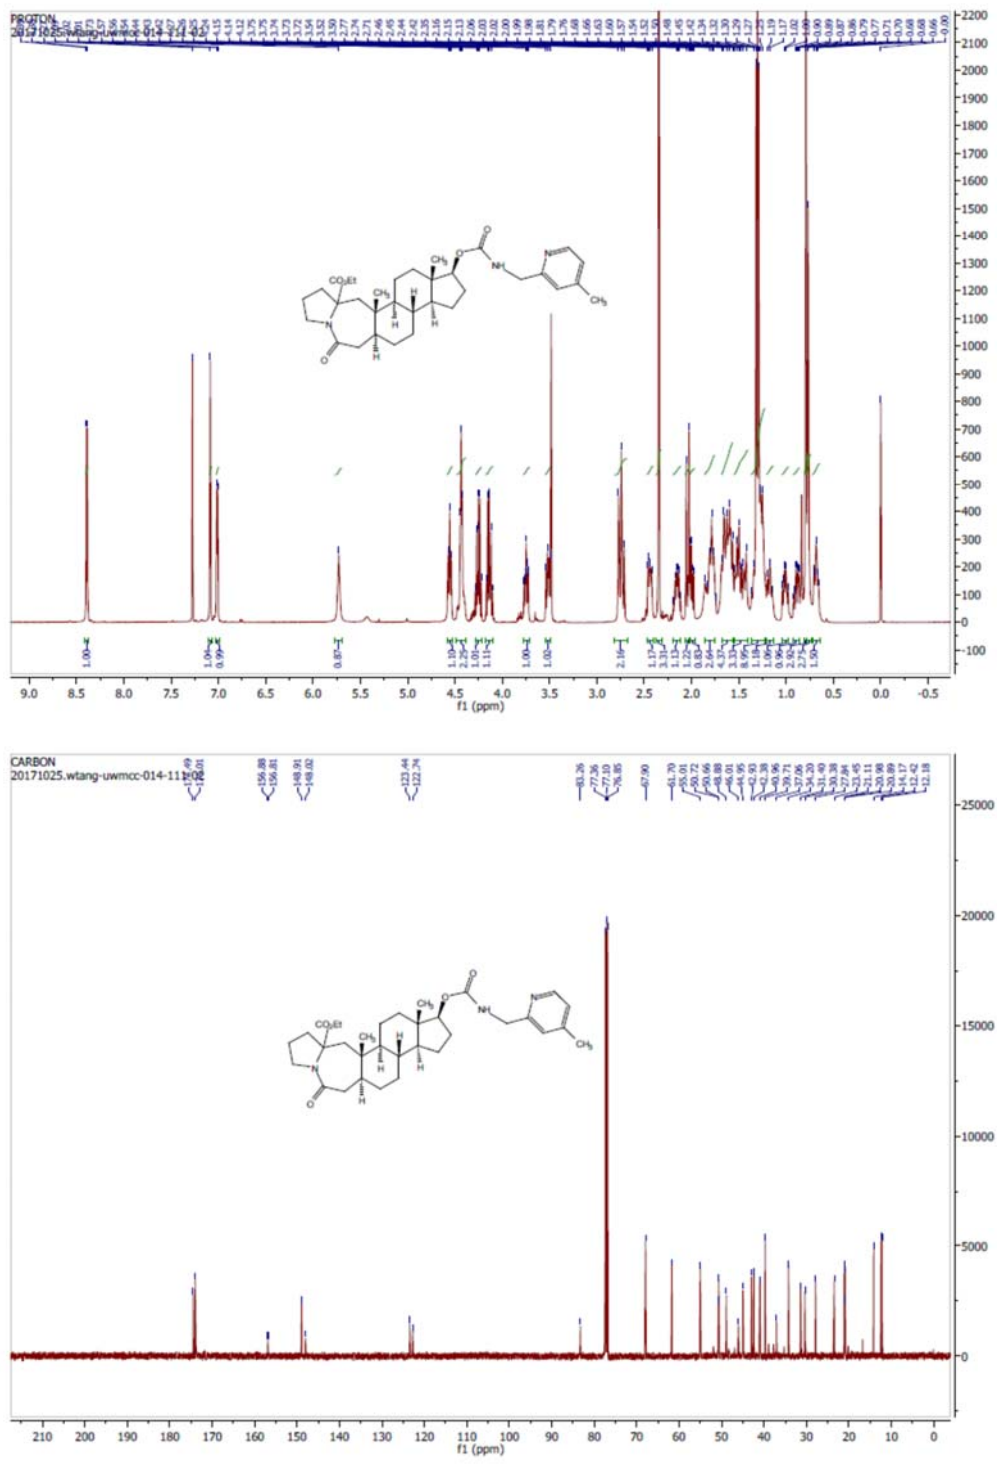

Supplementary Figure 106. <sup>1</sup>H and <sup>13</sup>C spectra of 40h.

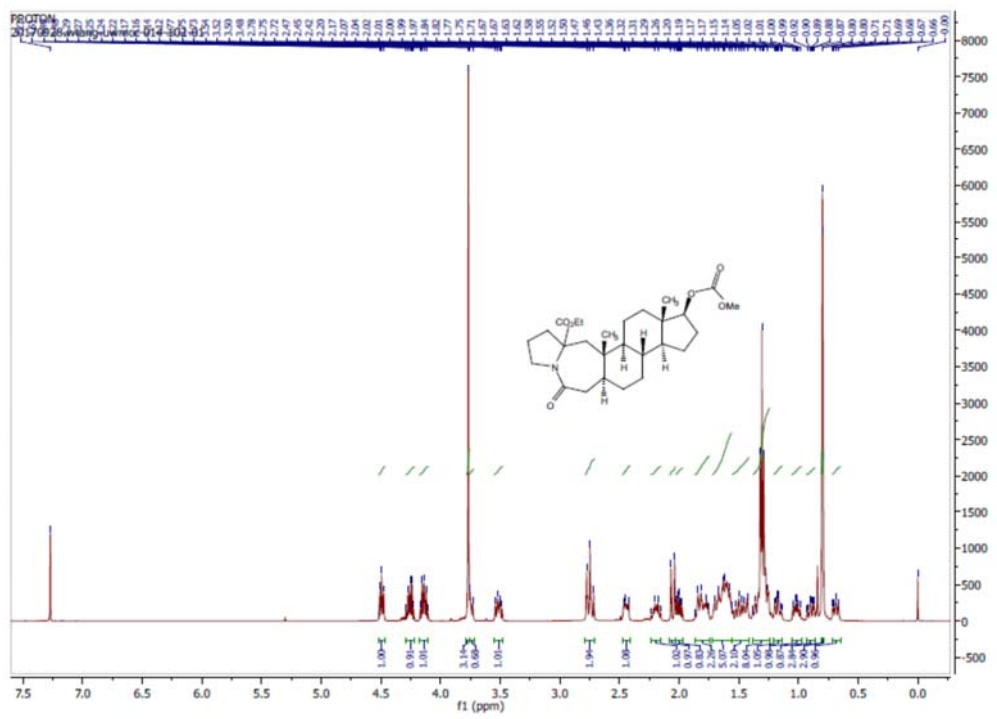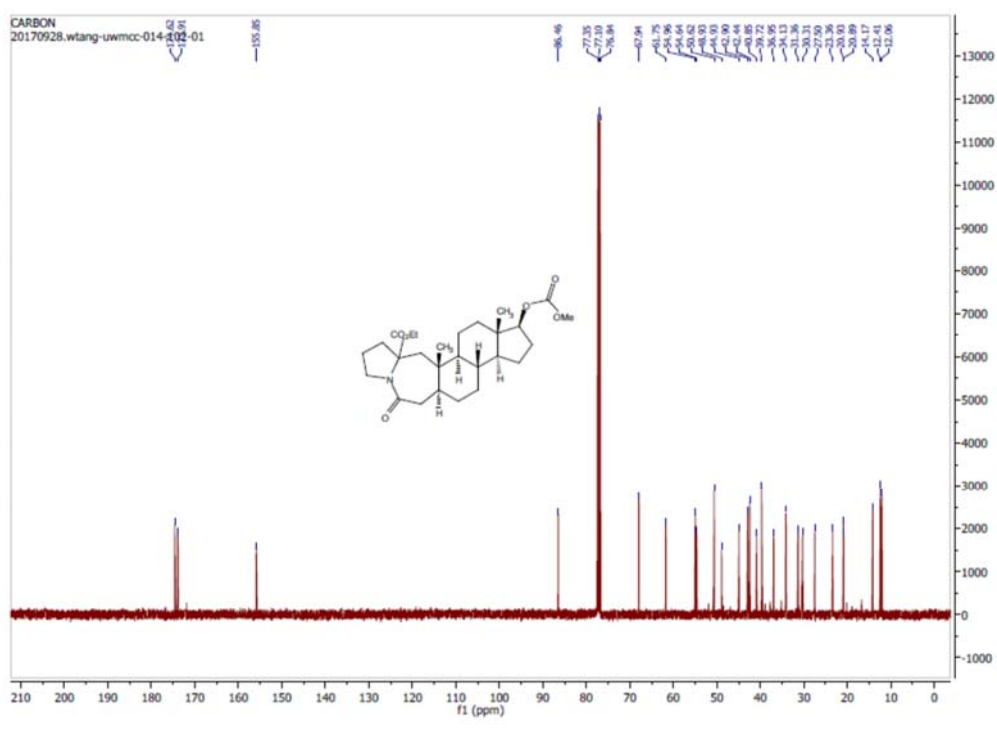

Supplementary Figure 107. <sup>1</sup>H and <sup>13</sup>C spectra of 40i.

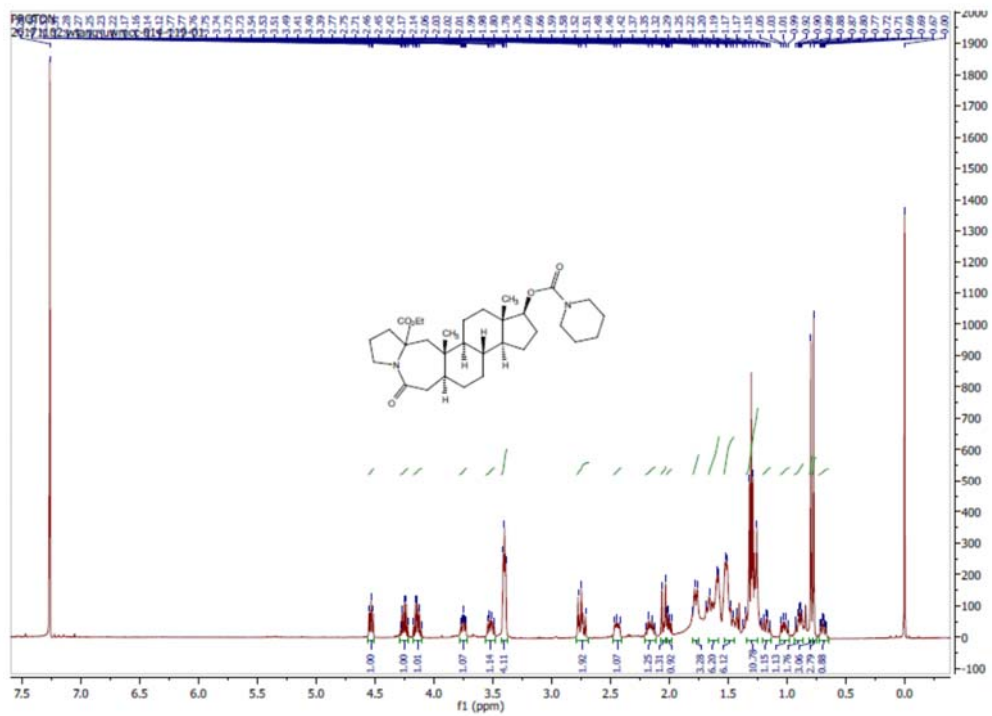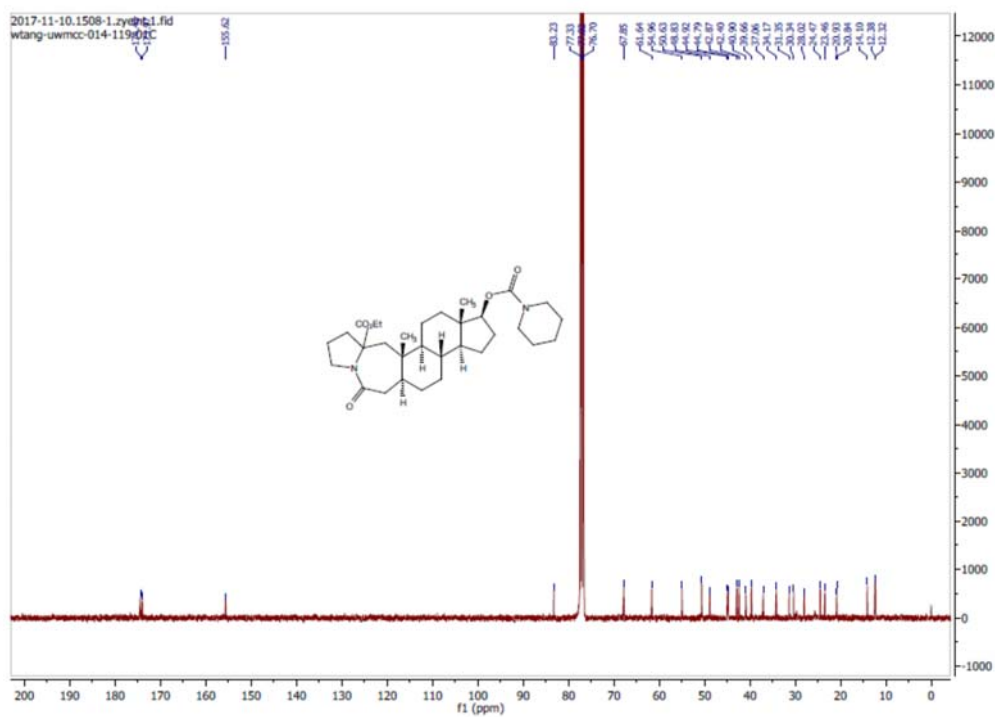

Supplementary Figure 108.  $^1\text{H}$  and  $^{13}\text{C}$  spectra of 40j.

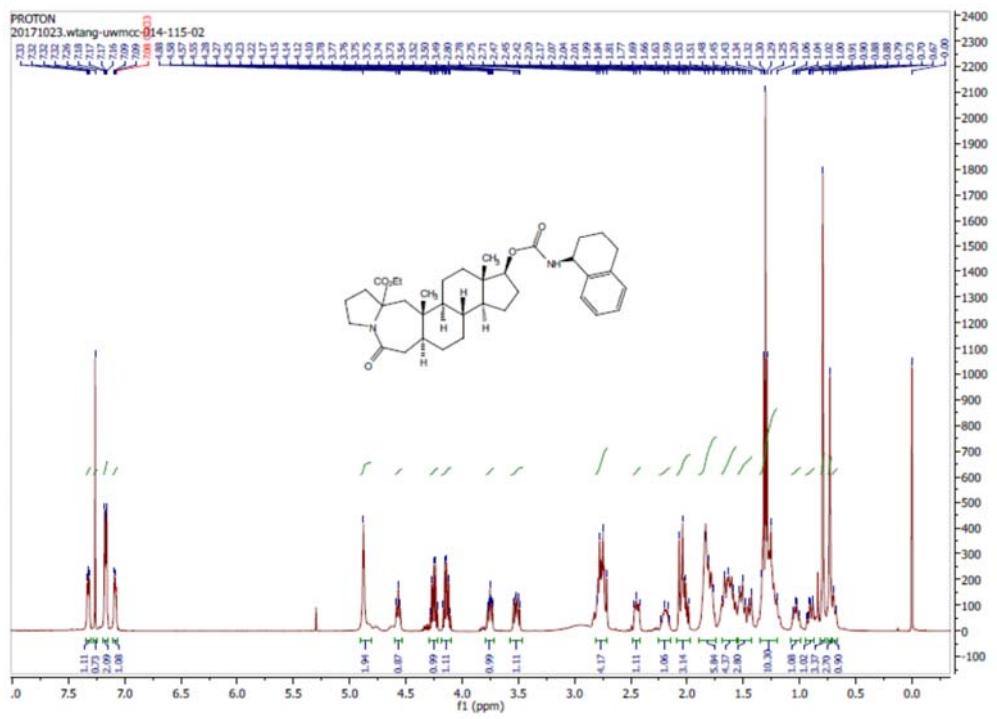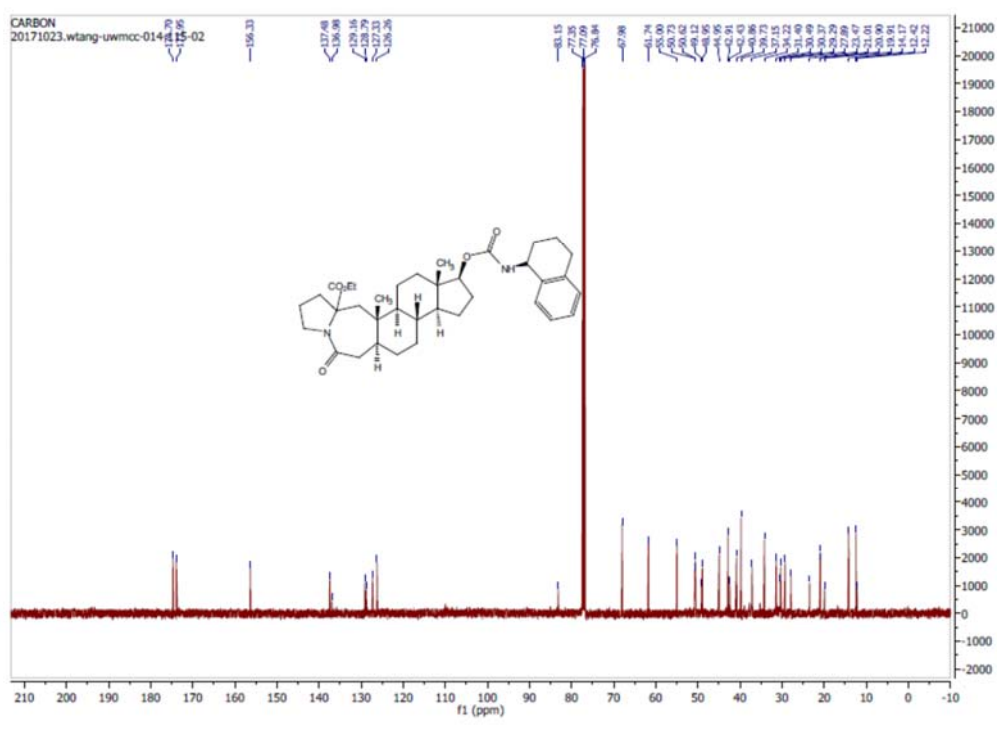

Supplementary Figure 109. <sup>1</sup>H and <sup>13</sup>C spectra of 40k.

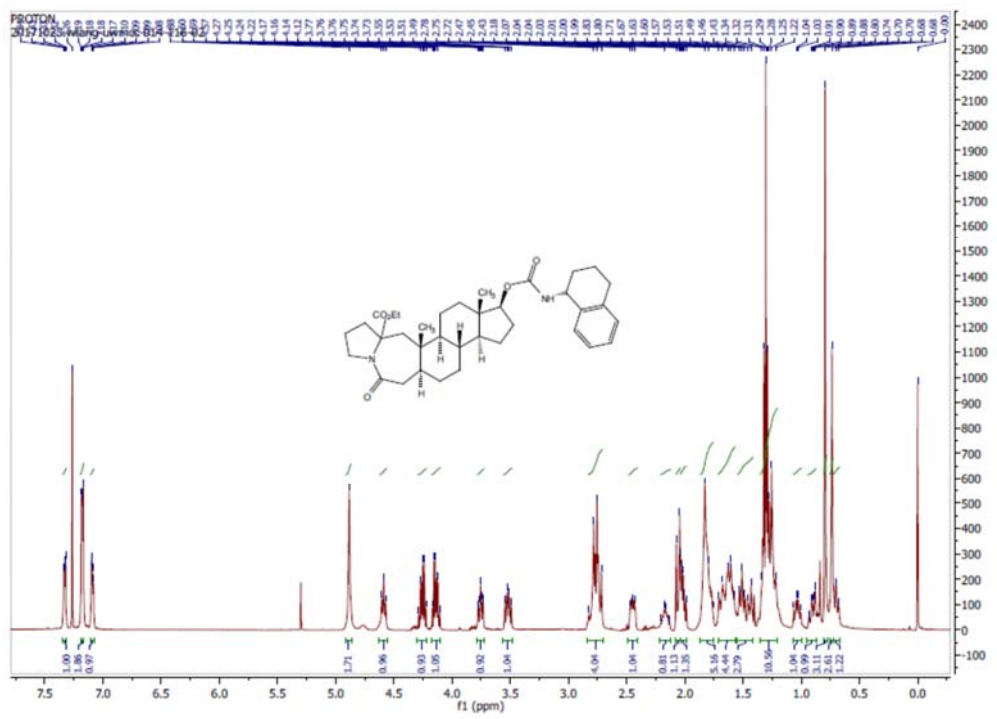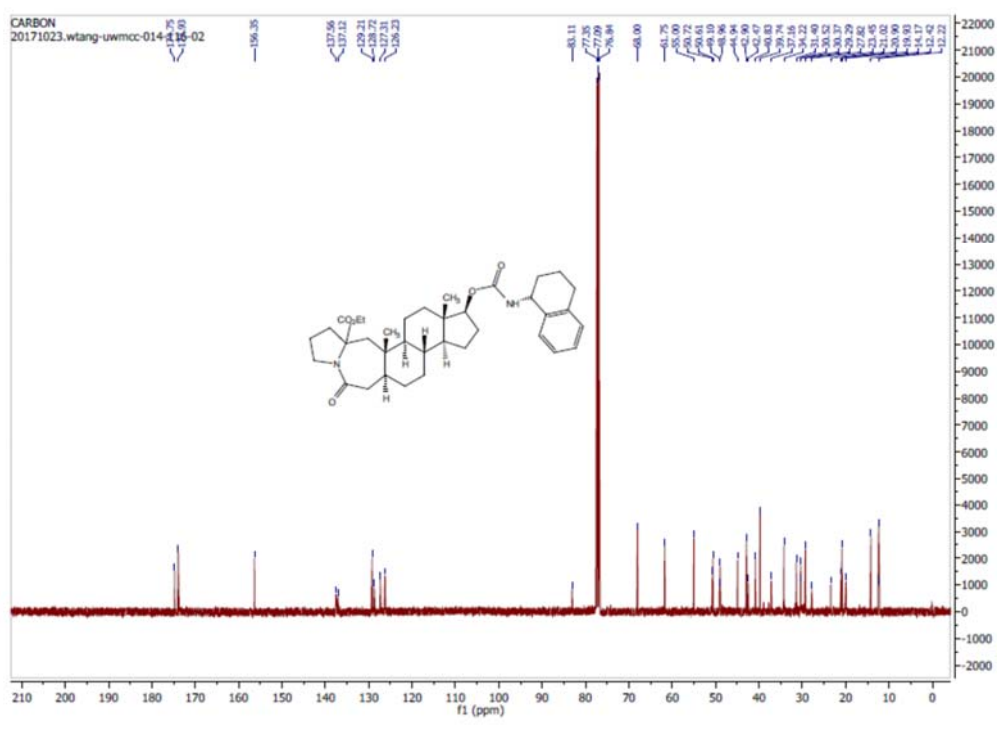

Supplementary Figure 110. <sup>1</sup>H and <sup>13</sup>C spectra of 401.

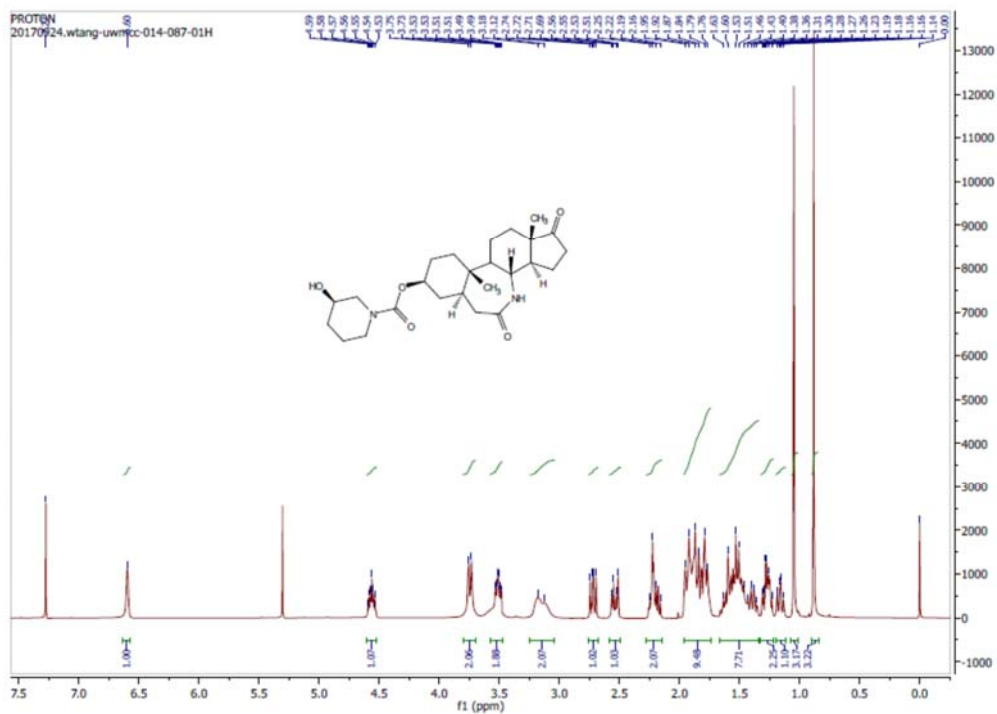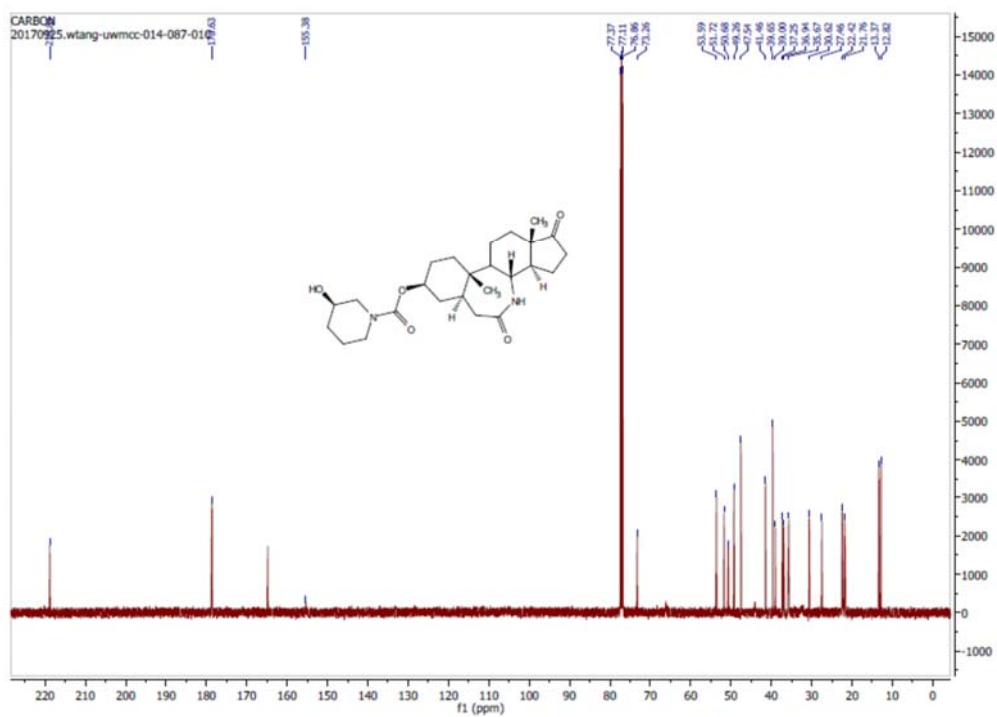

Supplementary Figure 111.  $^1\text{H}$  and  $^{13}\text{C}$  spectra of 41aa.

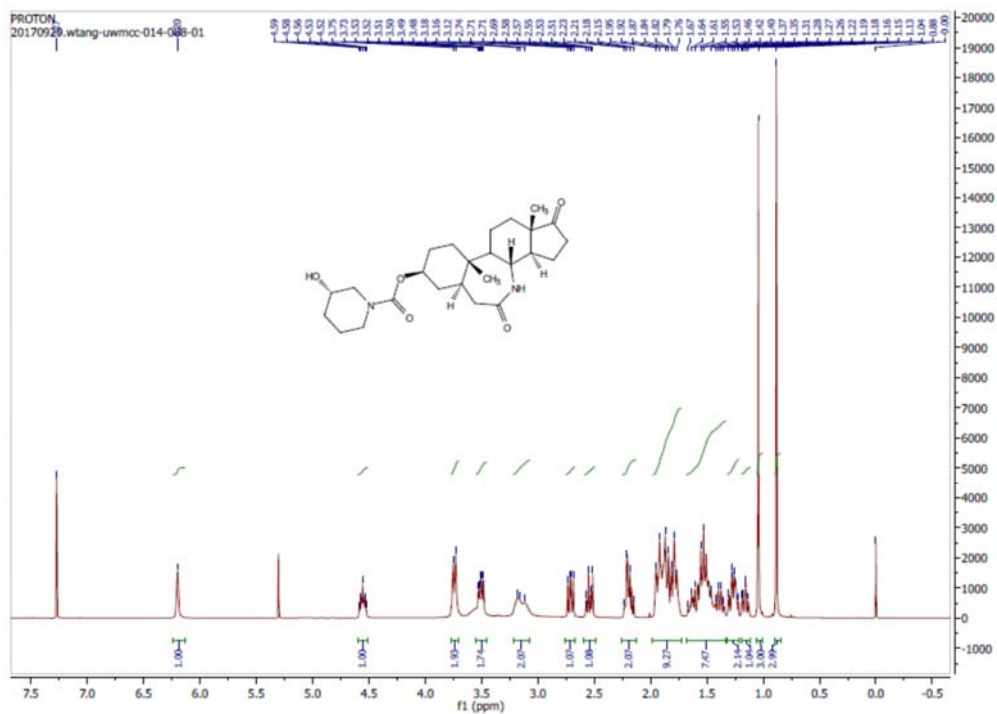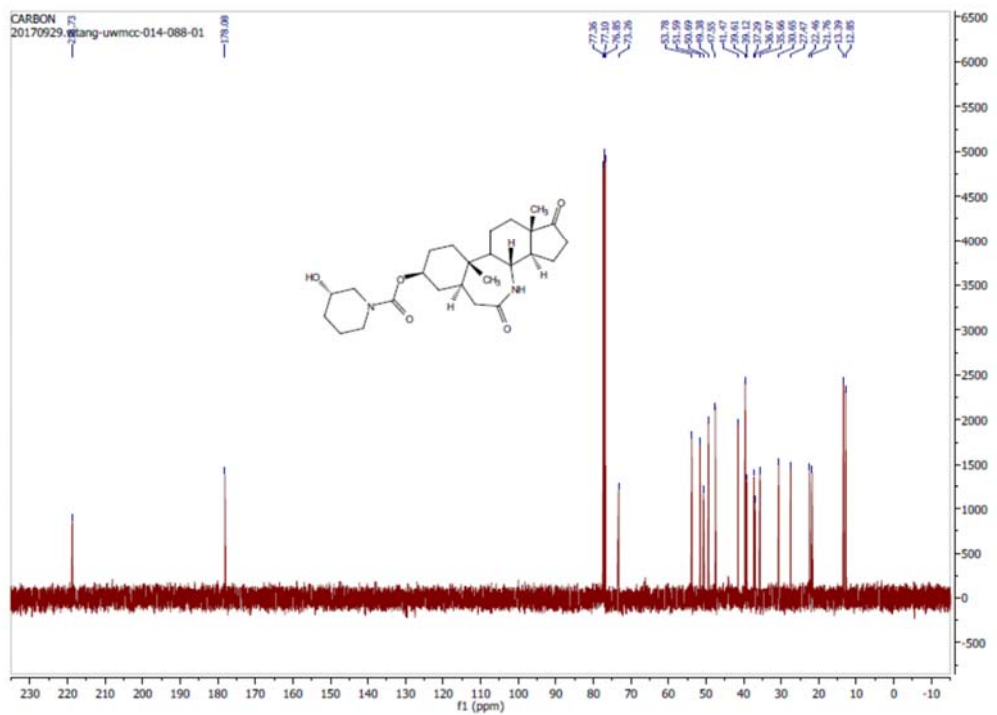

Supplementary Figure 112.  $^1\text{H}$  and  $^{13}\text{C}$  spectra of 41ab.

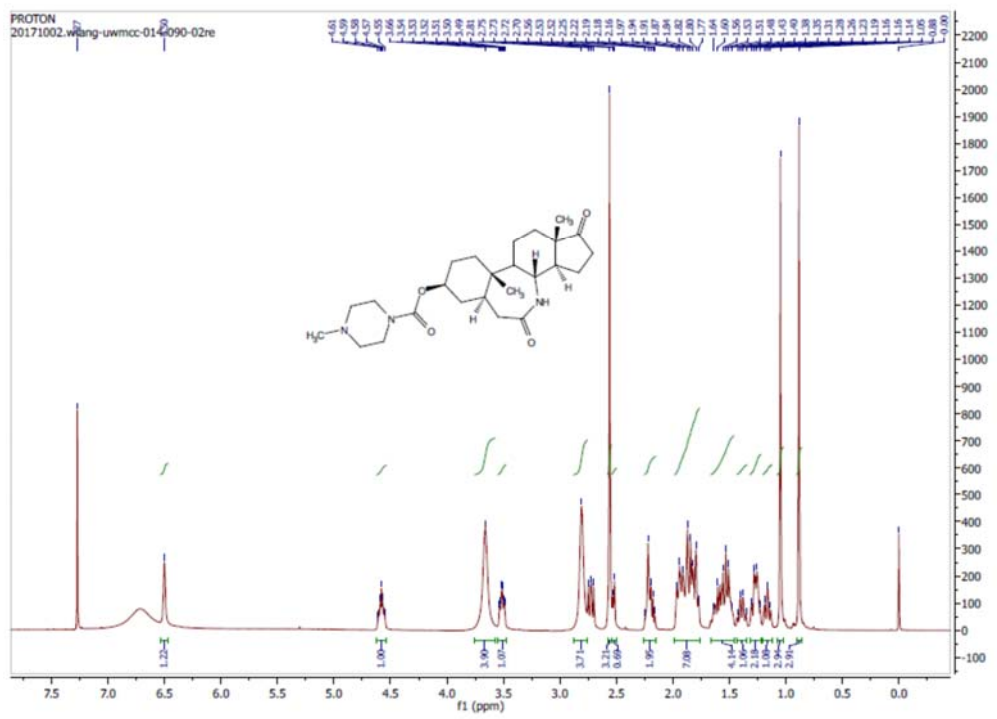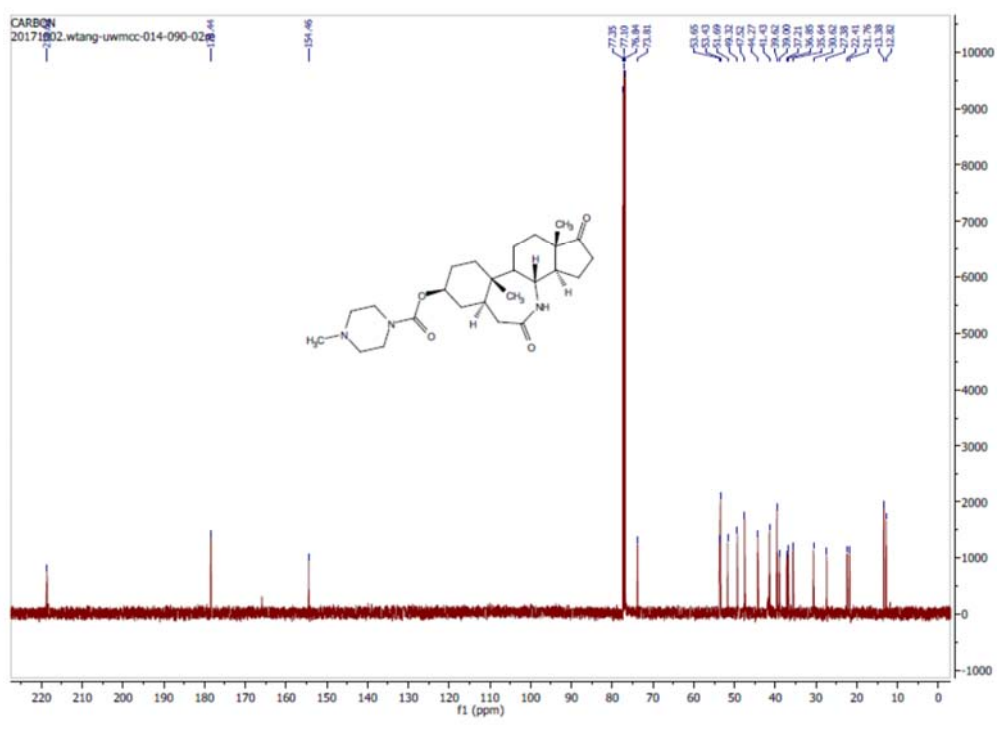

Supplementary Figure 113.  $^1\text{H}$  and  $^{13}\text{C}$  spectra of 41ab.



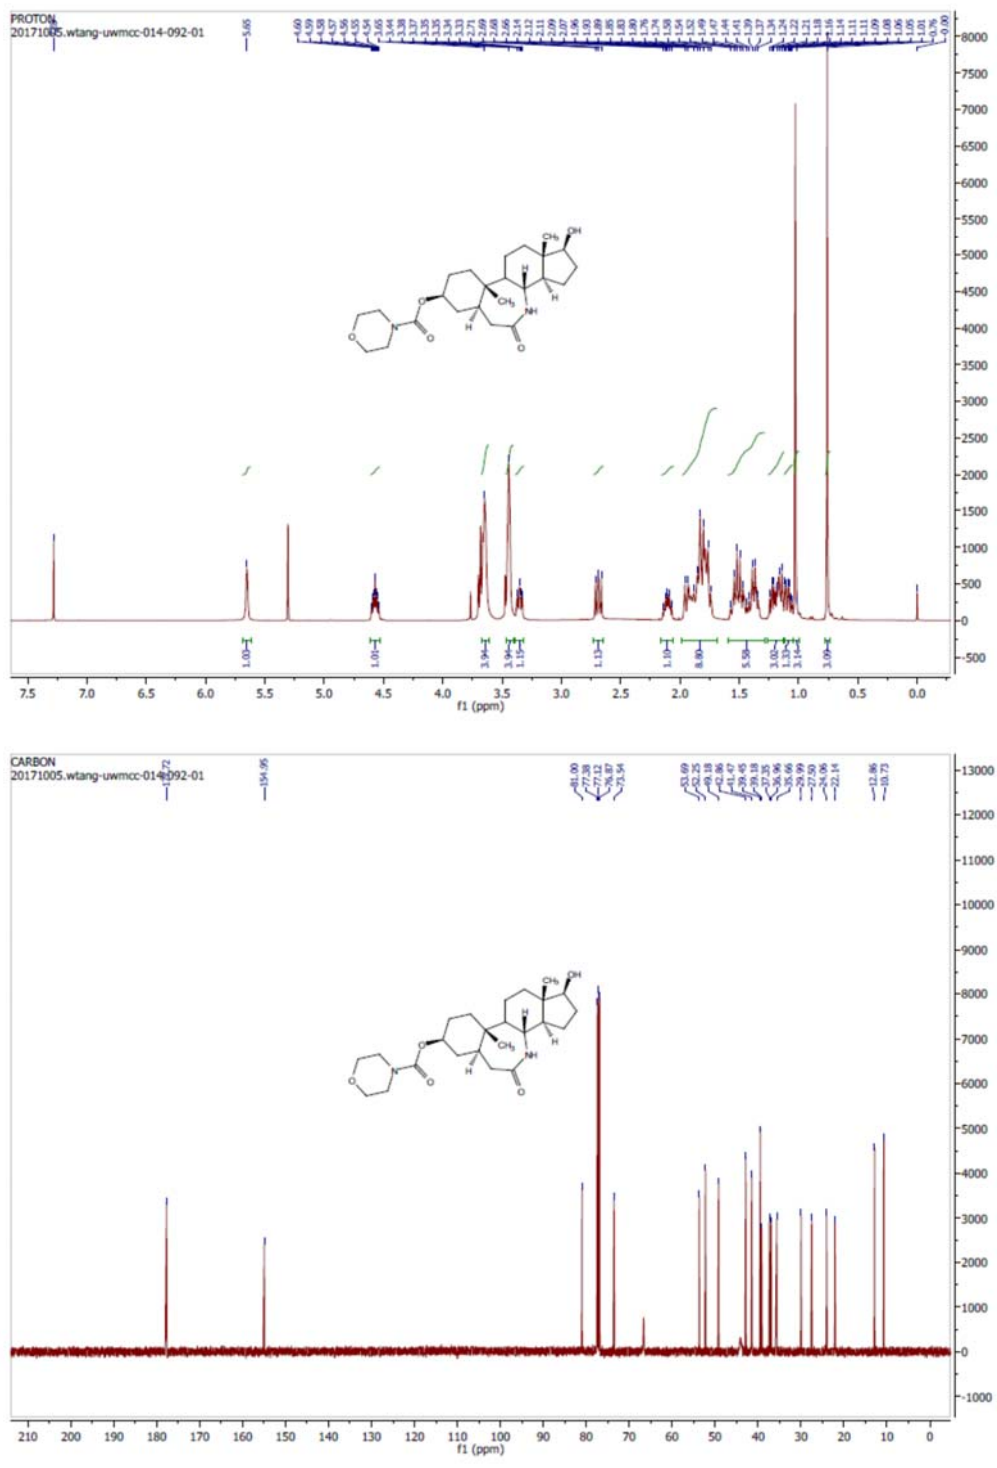

Supplementary Figure 114. <sup>1</sup>H and <sup>13</sup>C spectra of 41ac.

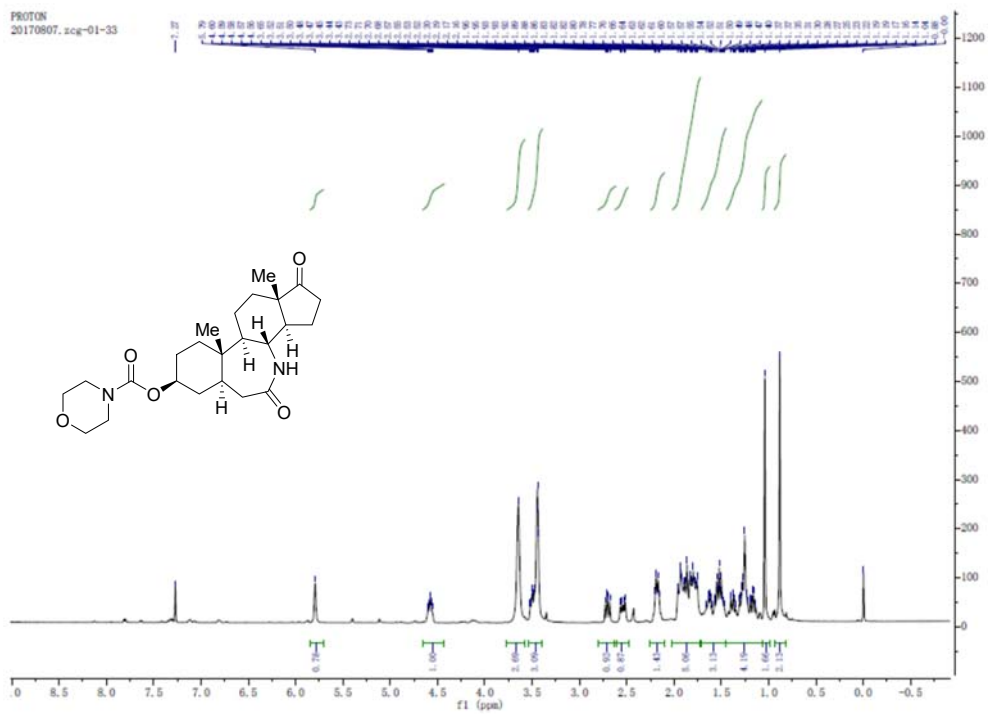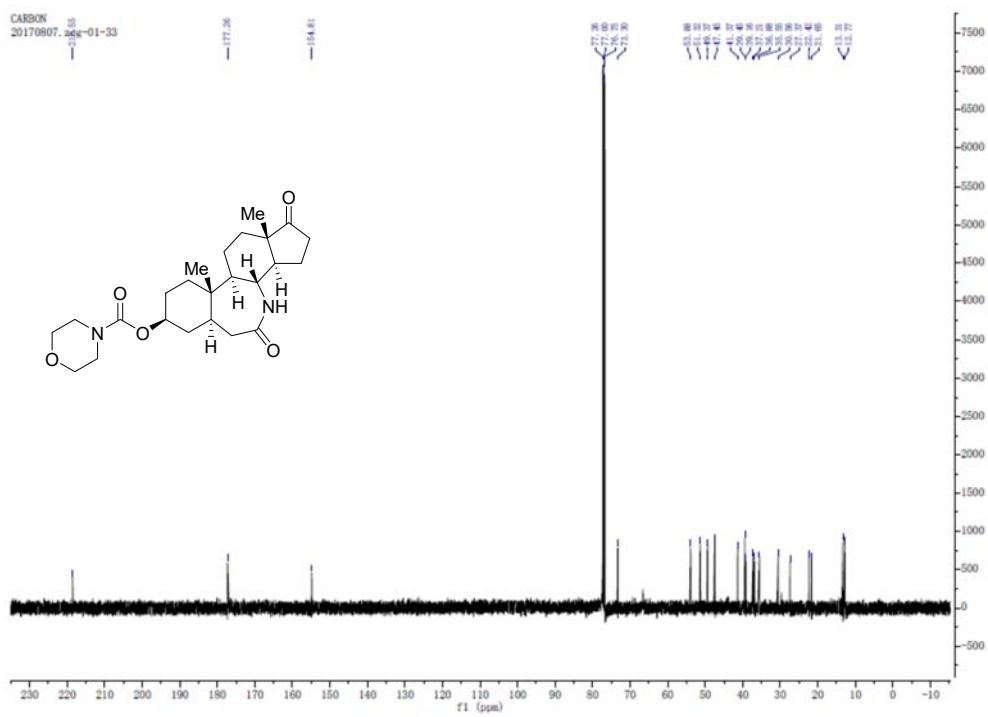

Supplementary Figure 115.  $^1\text{H}$  and  $^{13}\text{C}$  spectra of 41ad.

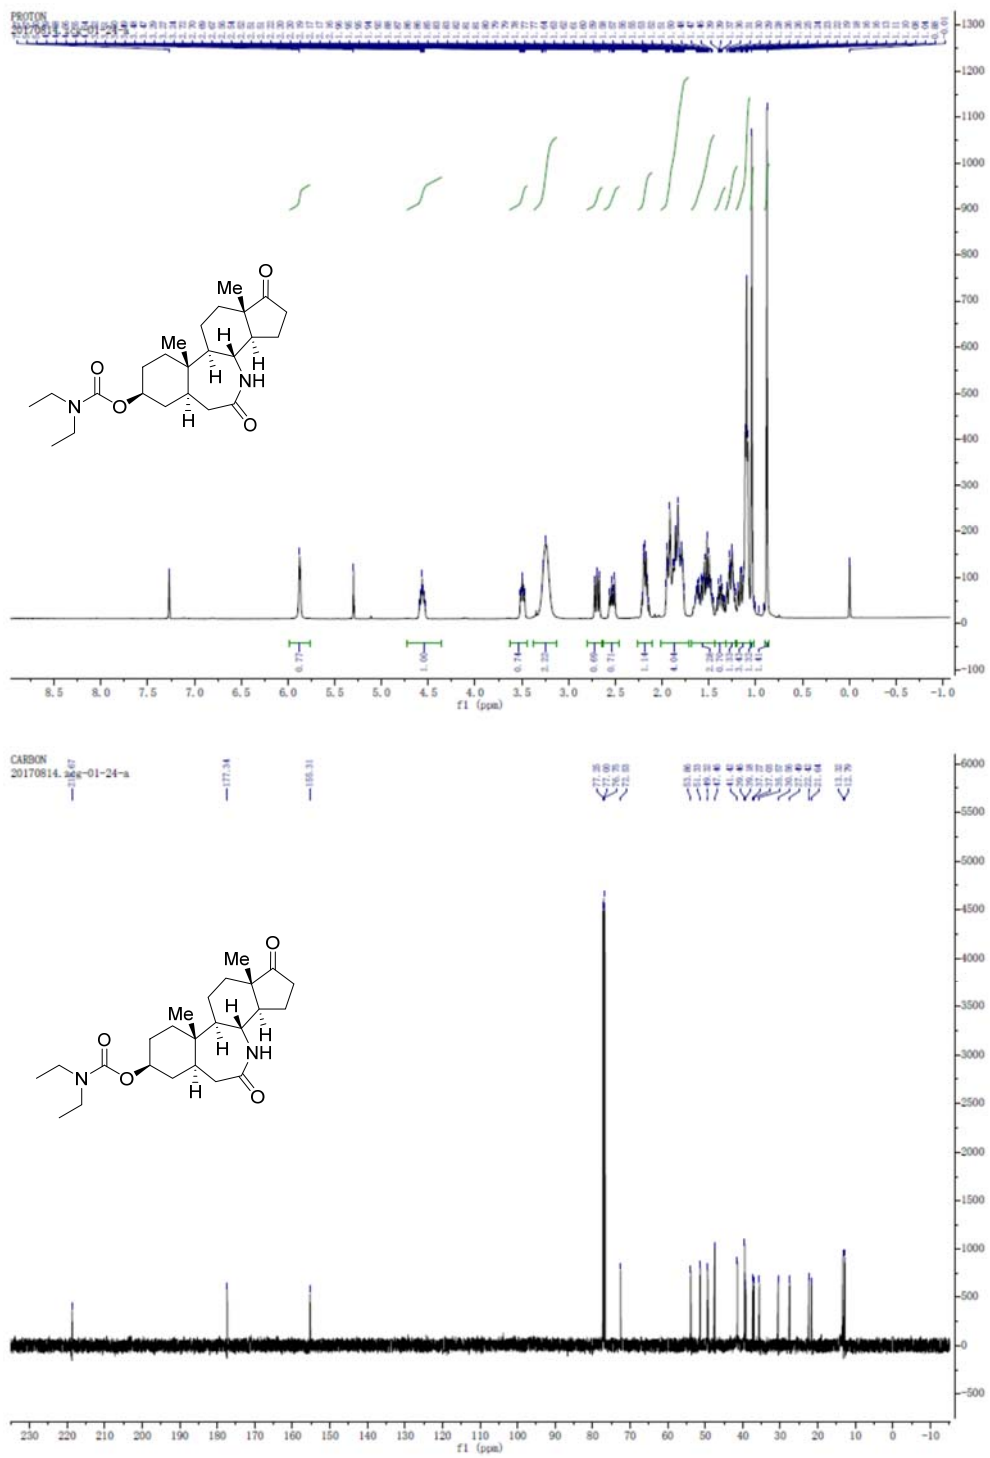

**Supplementary Figure 116.**  $^1\text{H}$  and  $^{13}\text{C}$  spectra of **41ae**.

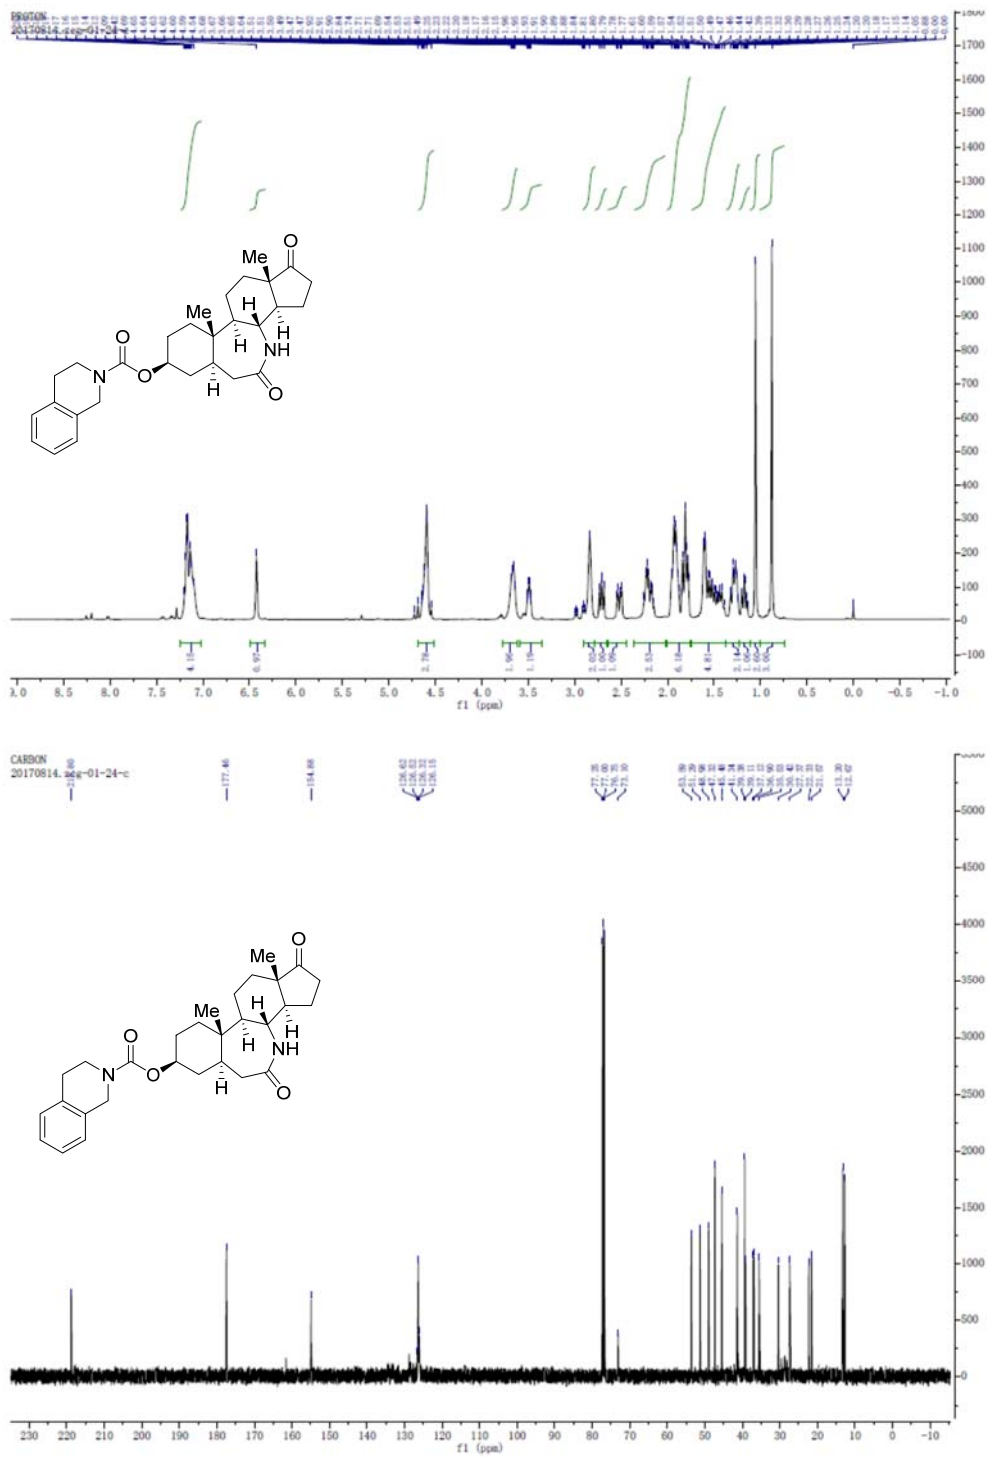

Supplementary Figure 117.  $^1\text{H}$  and  $^{13}\text{C}$  spectra of 41af.

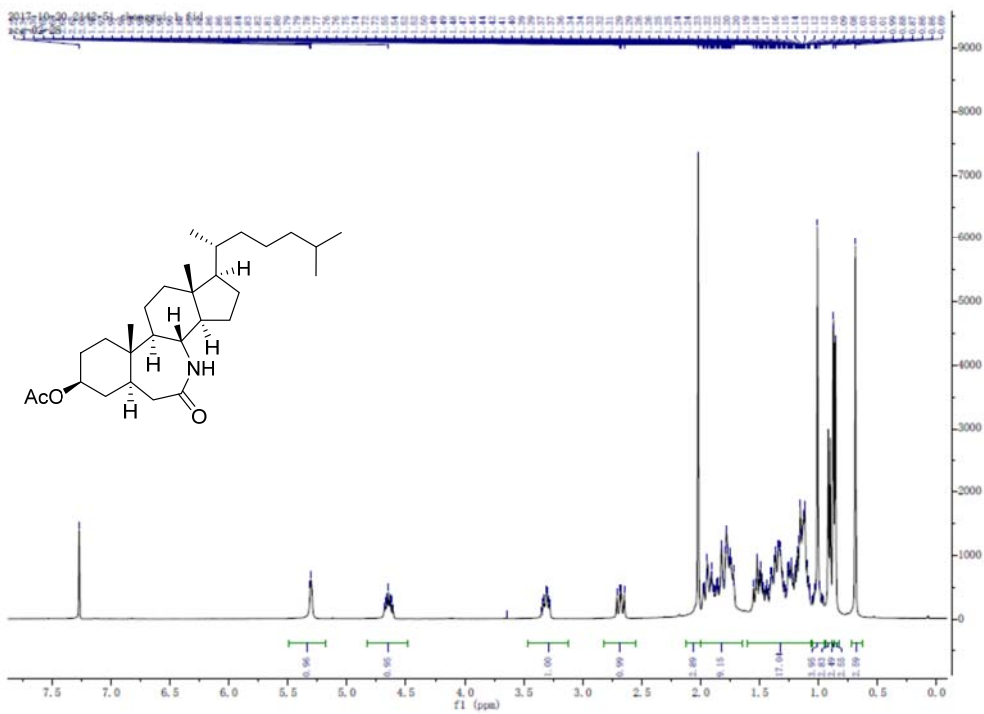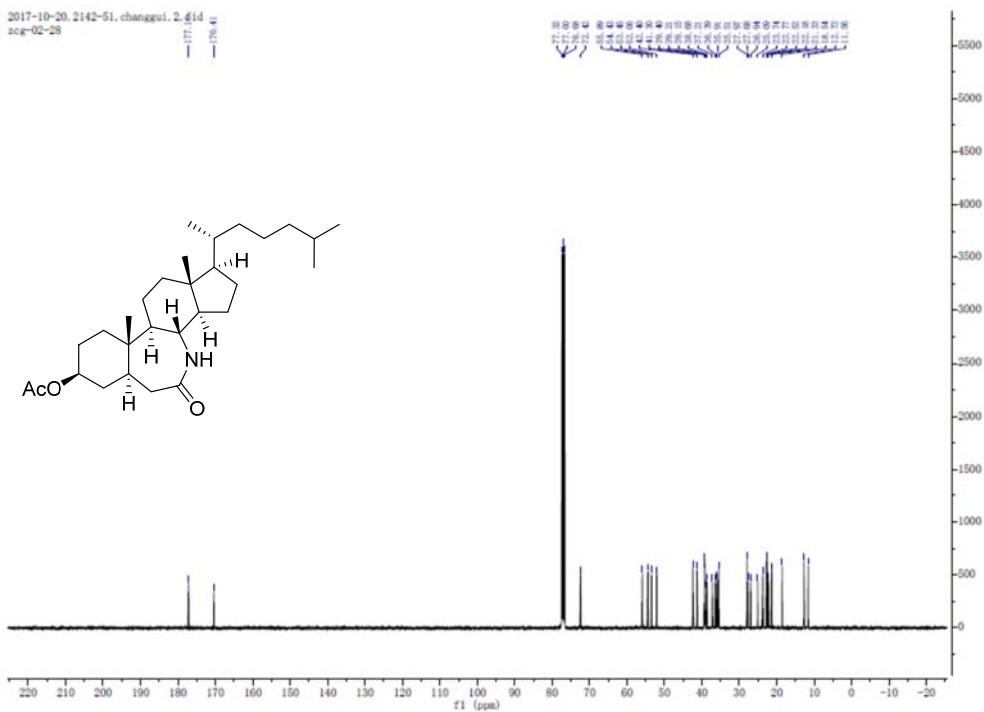

Supplementary Figure 118.  $^1\text{H}$  and  $^{13}\text{C}$  spectra of 41bb.

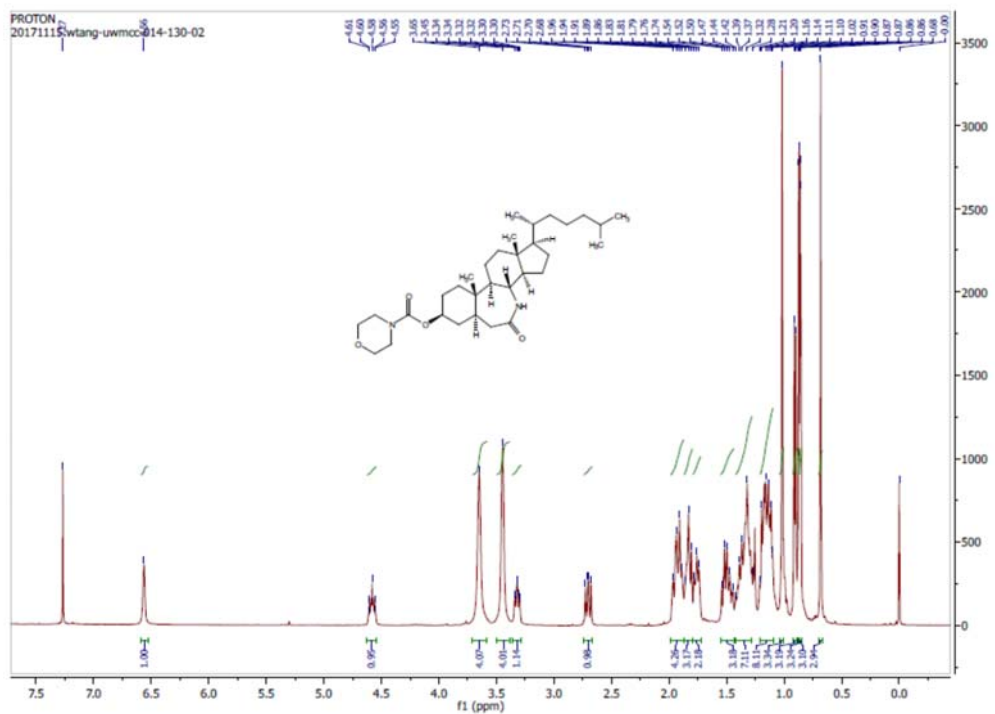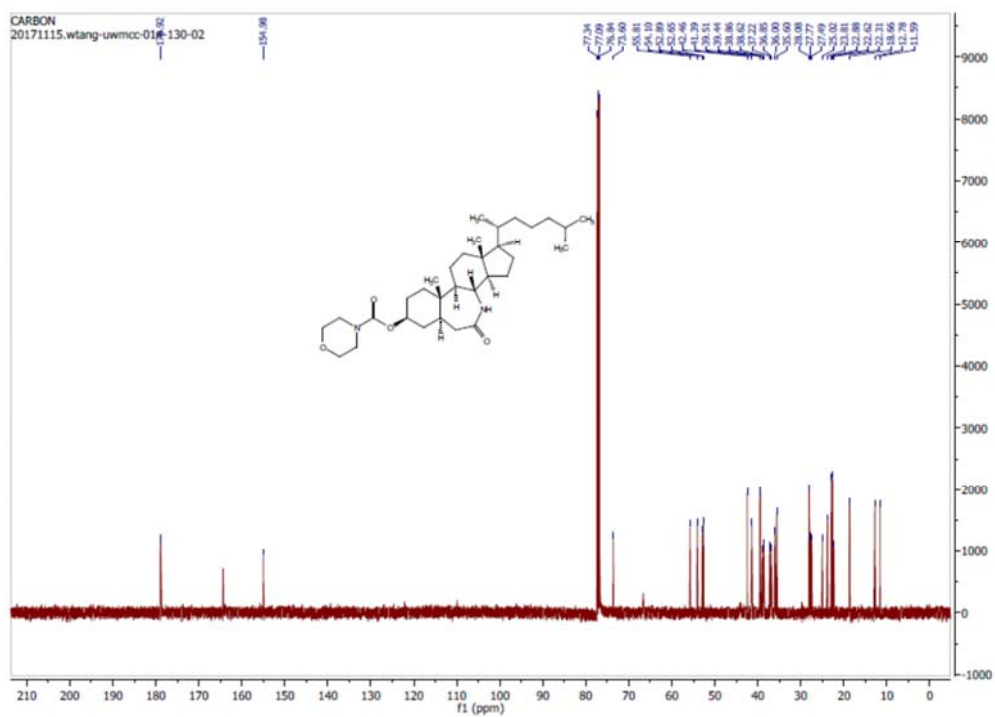

Supplementary Figure 119.  $^1\text{H}$  and  $^{13}\text{C}$  spectra of 41bc.



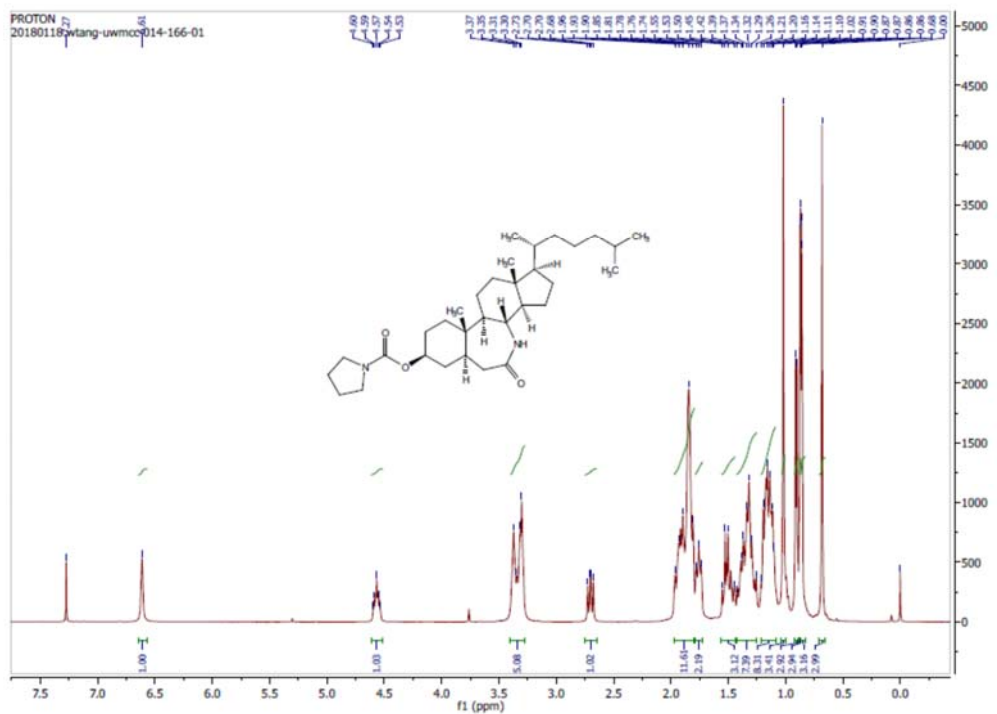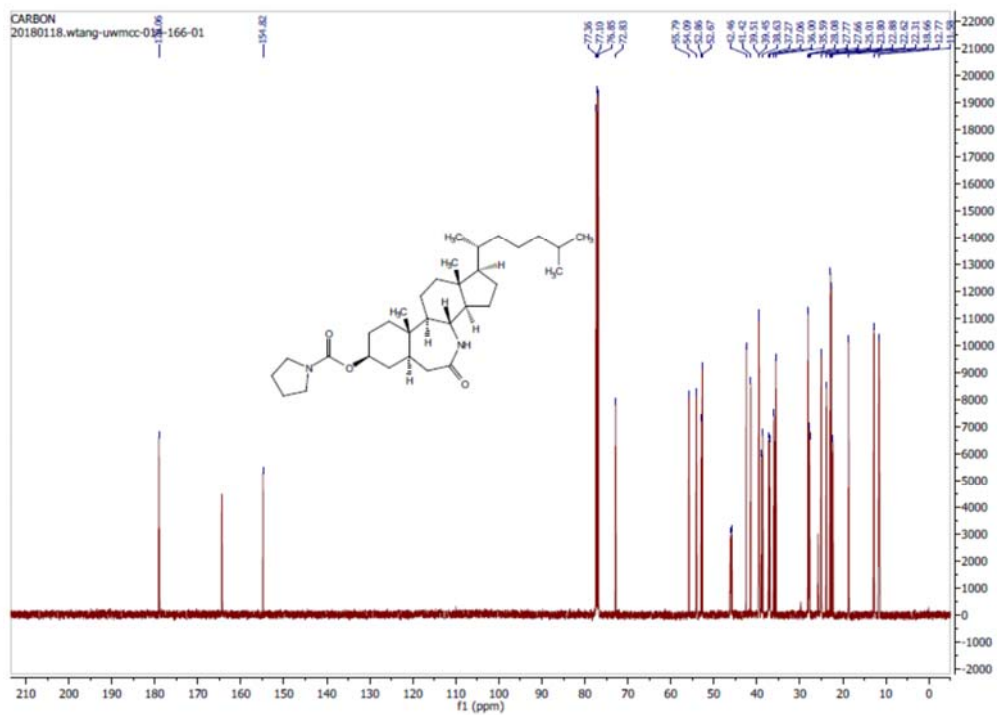

Supplementary Figure 121.  $^1\text{H}$  and  $^{13}\text{C}$  spectra of 41be.



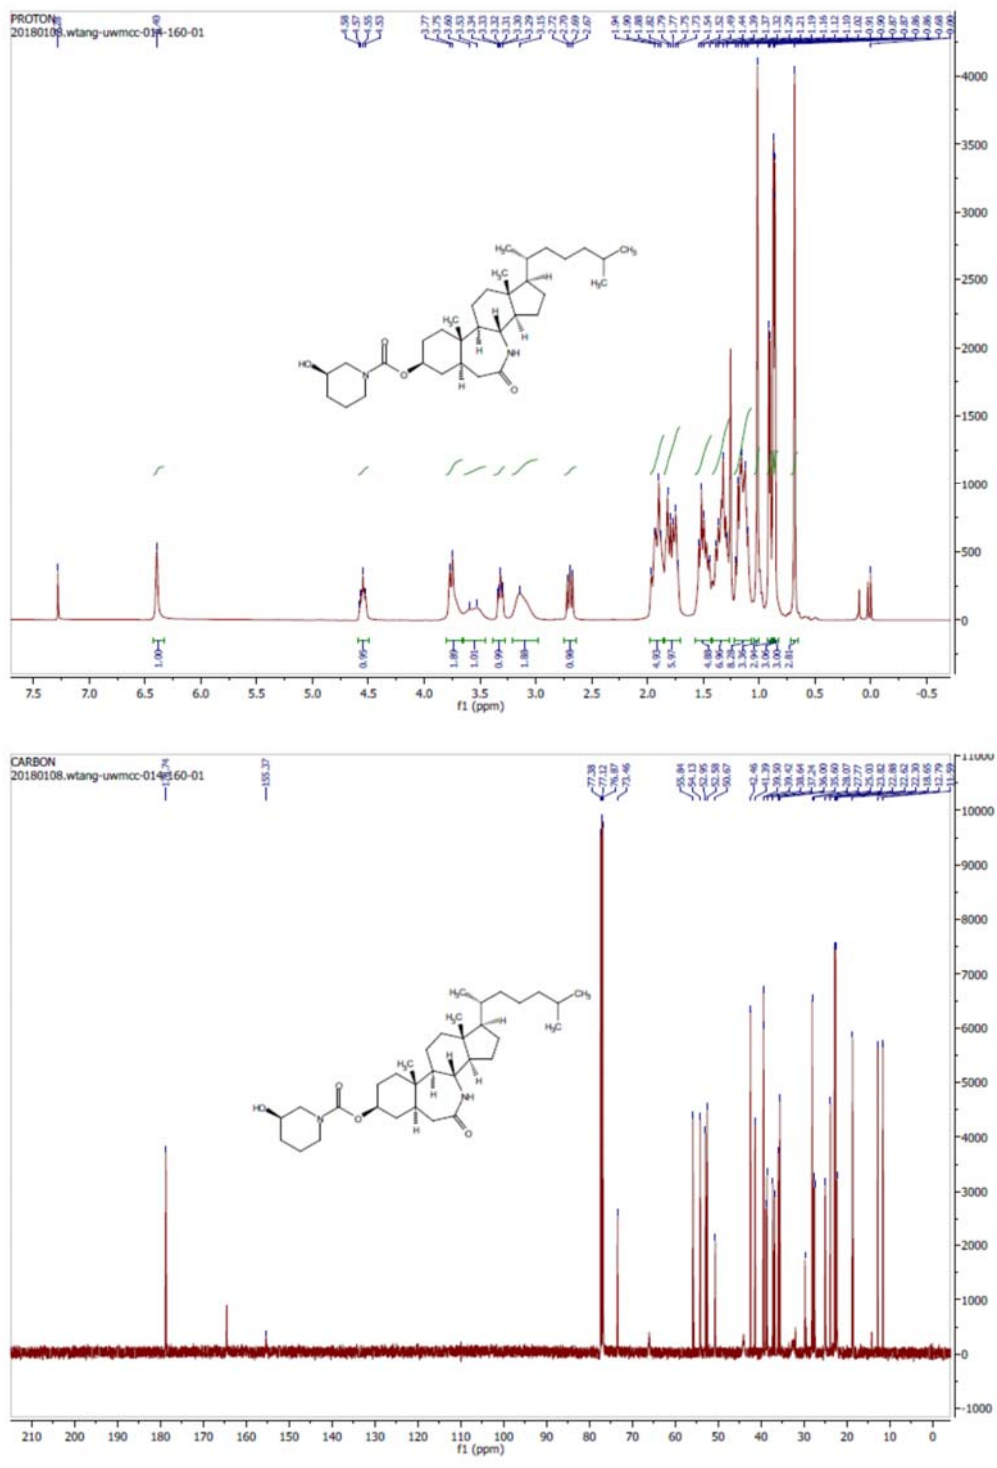

Supplementary Figure 122.  $^1\text{H}$  and  $^{13}\text{C}$  spectra of 41bf.

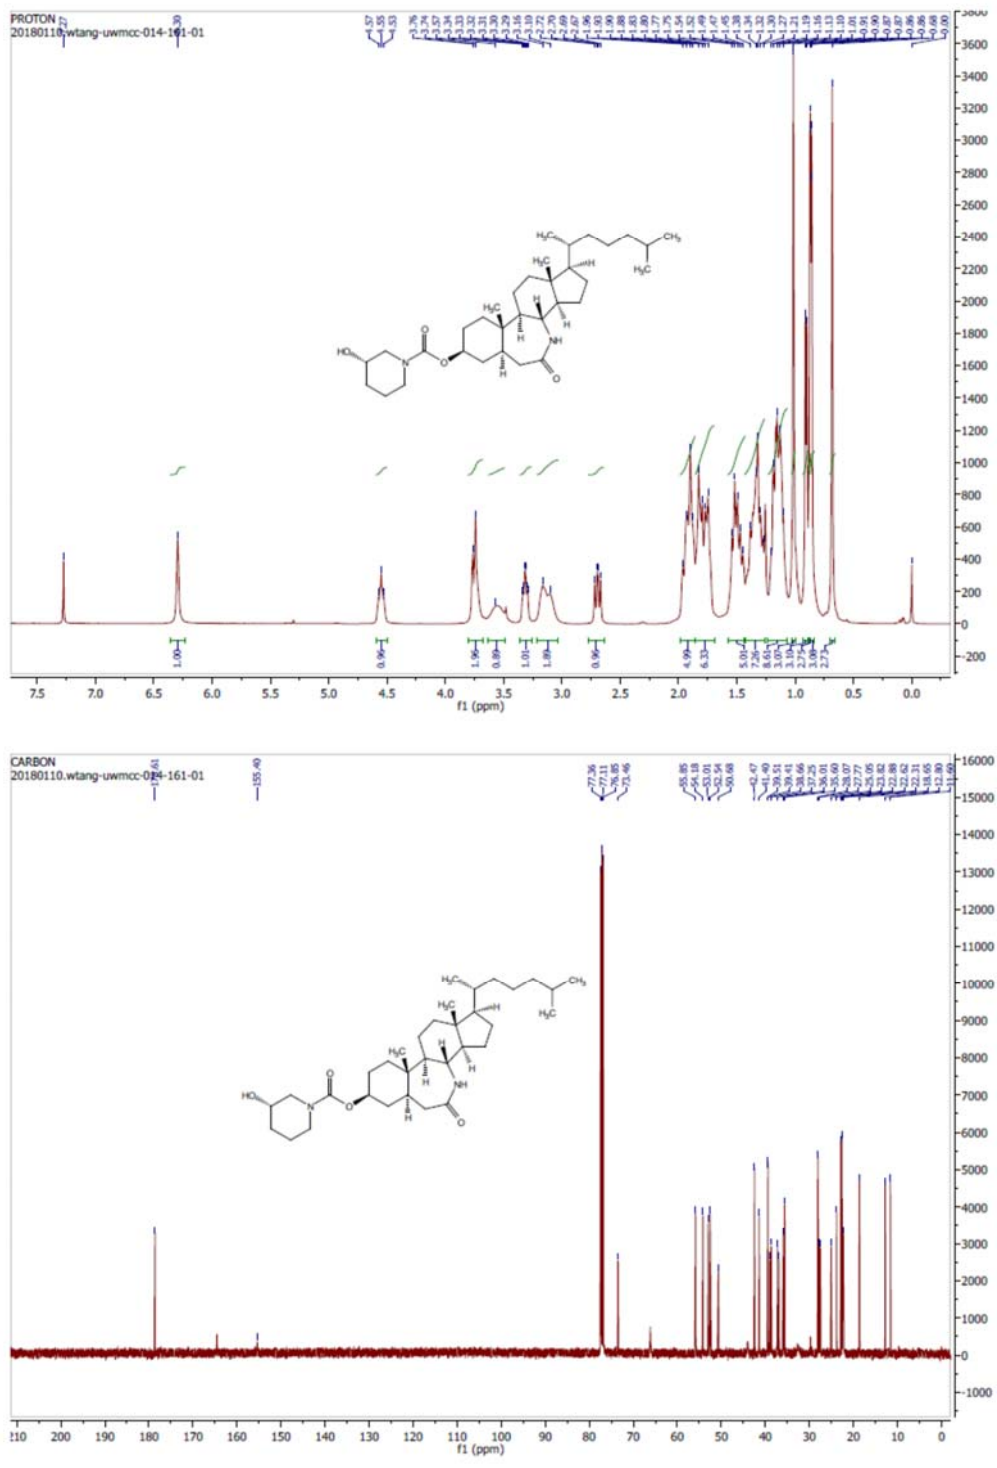

Supplementary Figure 123. <sup>1</sup>H and <sup>13</sup>C spectra of 41bg.

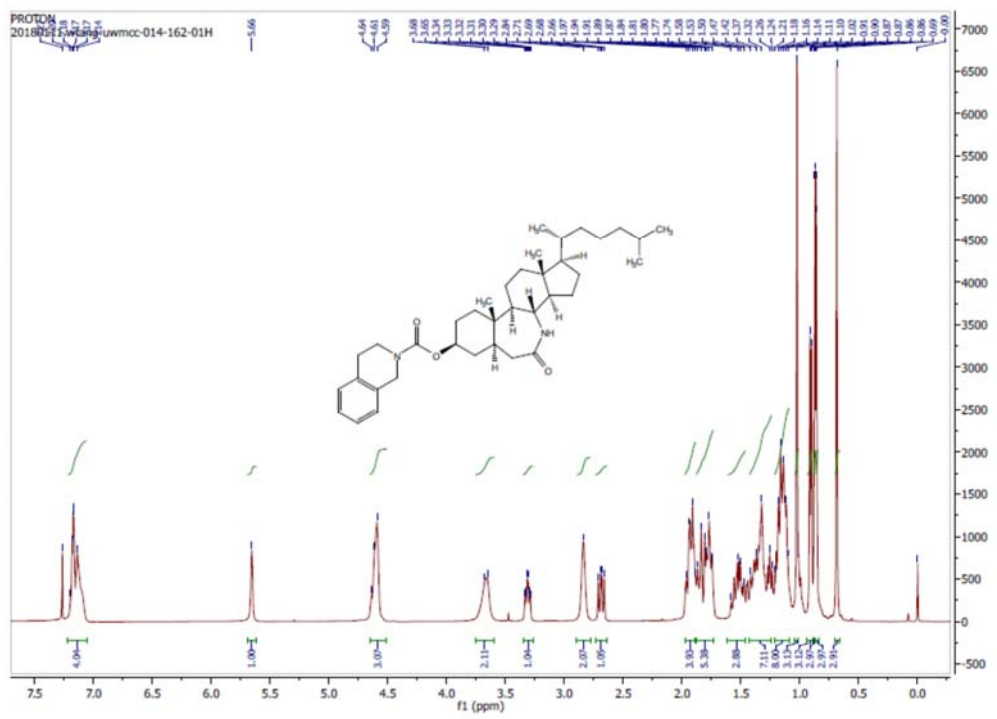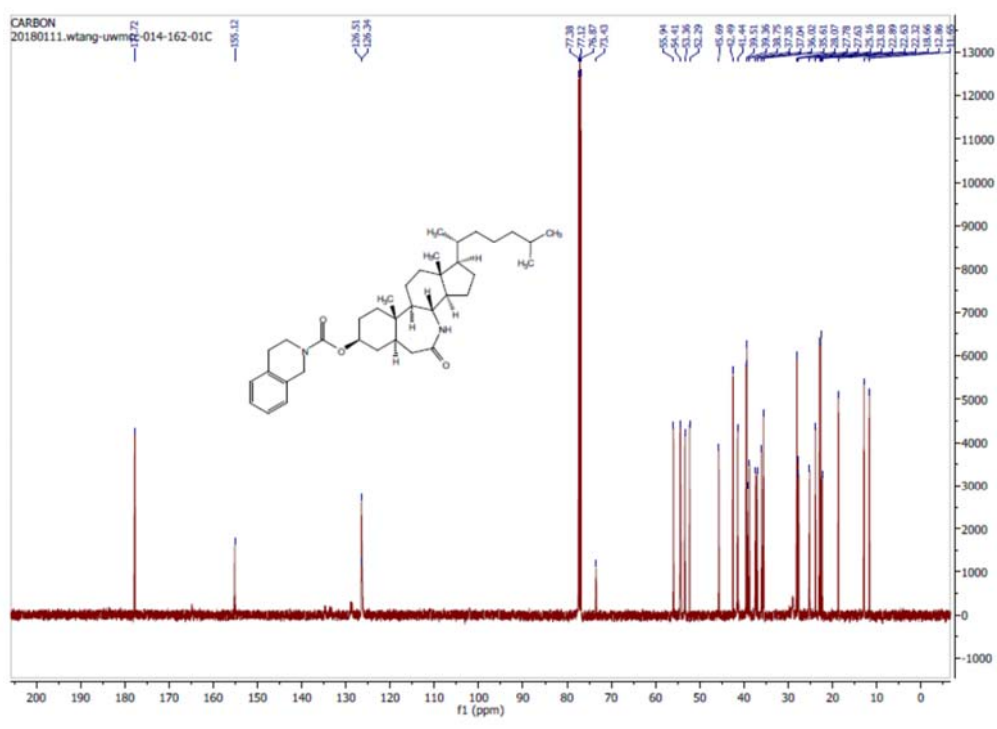

Supplementary Figure 124.  $^1\text{H}$  and  $^{13}\text{C}$  spectra of 41bh.

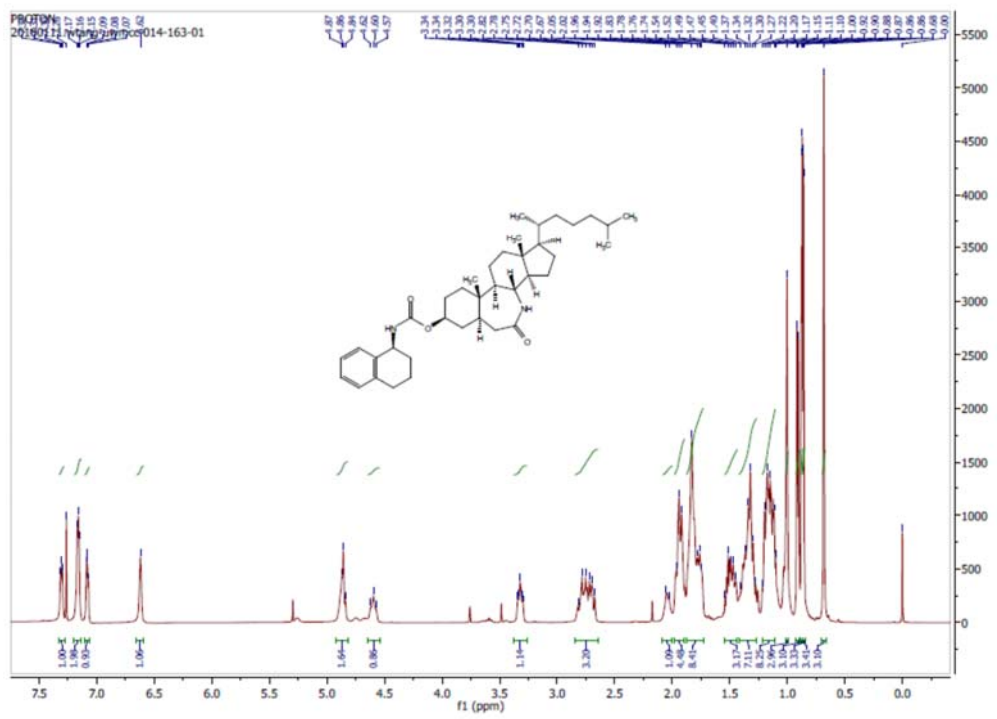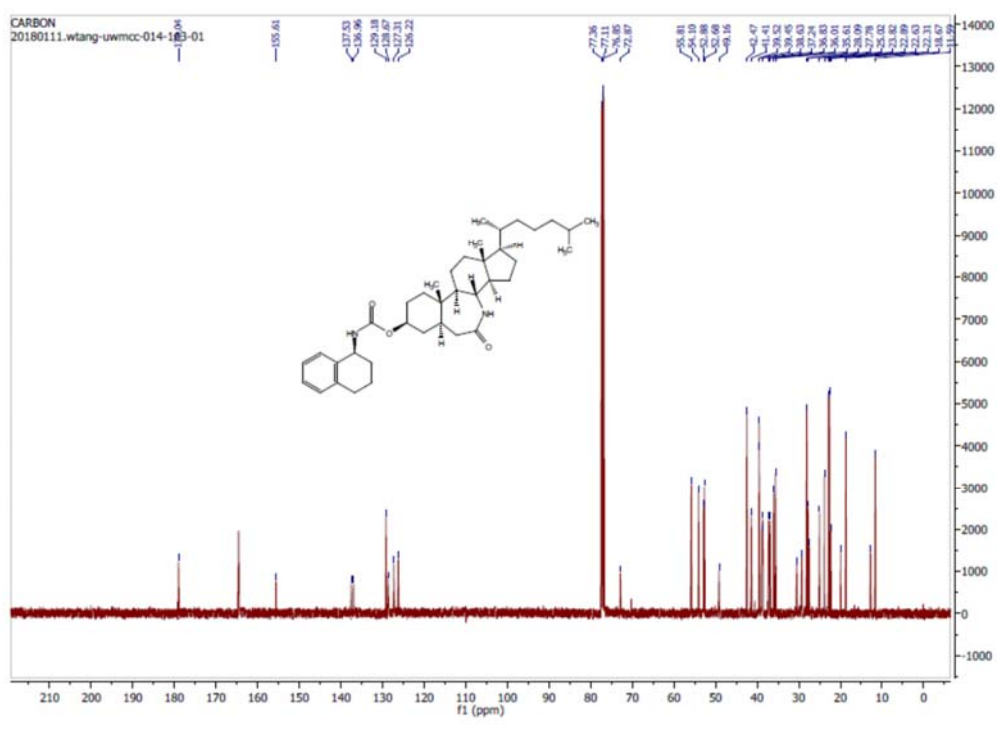

Supplementary Figure 125.  $^1\text{H}$  and  $^{13}\text{C}$  spectra of 41bi.



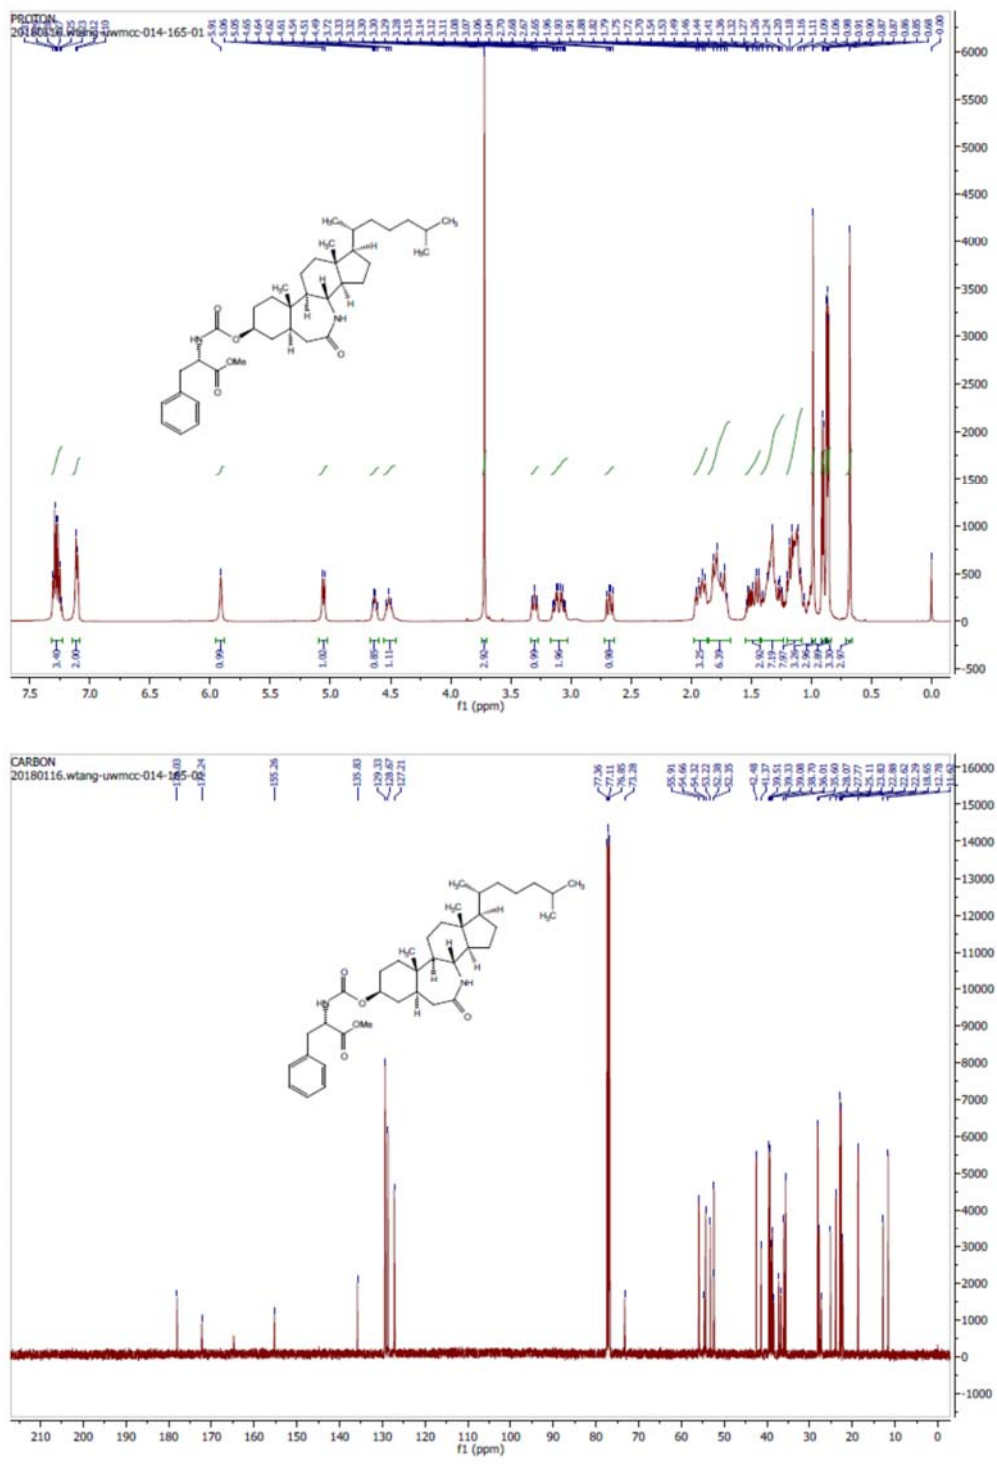

Supplementary Figure 127. <sup>1</sup>H and <sup>13</sup>C spectra of 41bk.



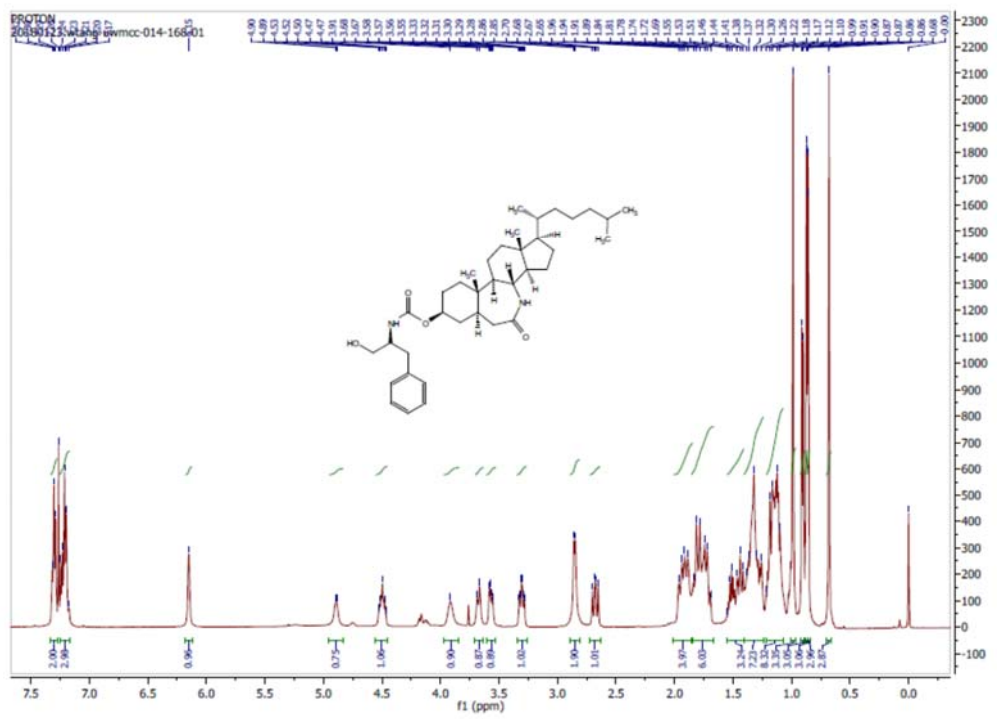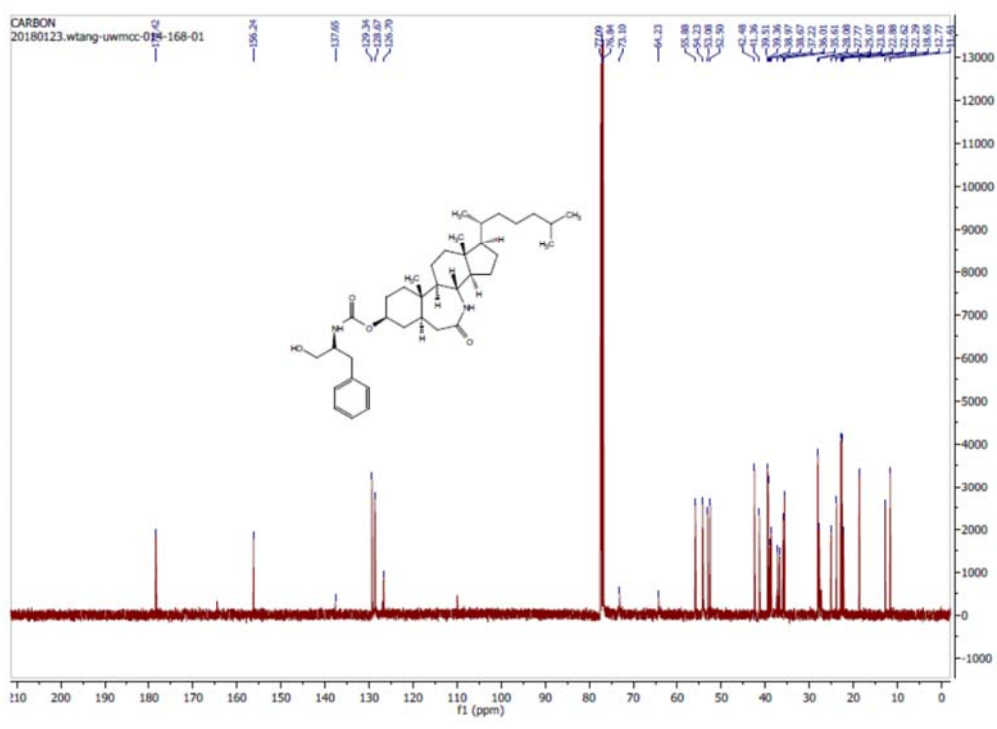

Supplementary Figure 129. <sup>1</sup>H and <sup>13</sup>C spectra of 41bm.



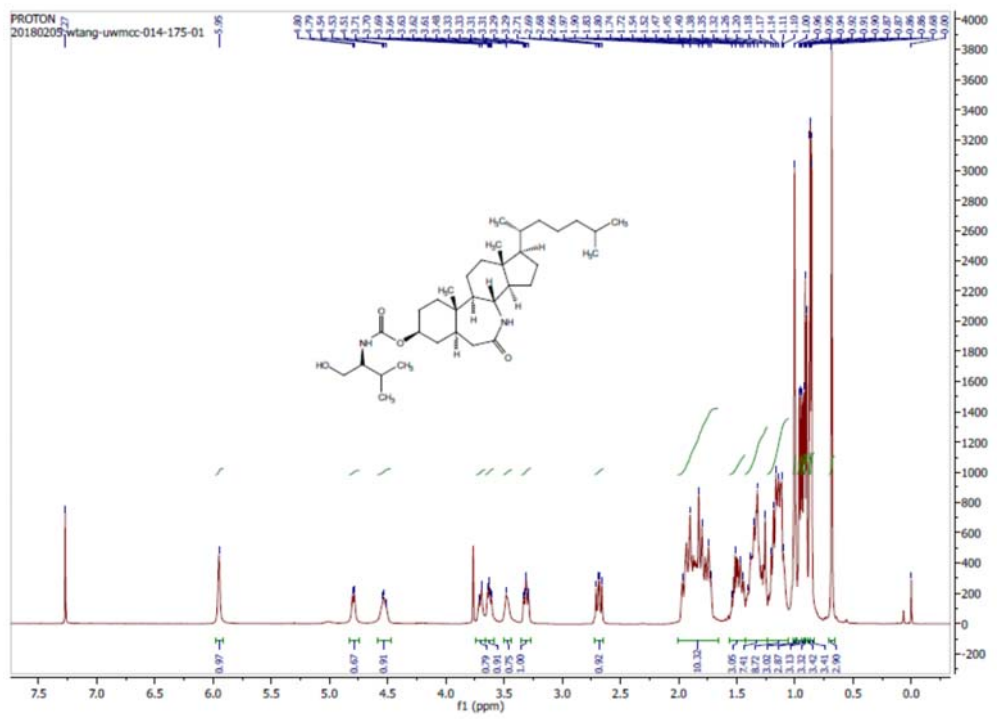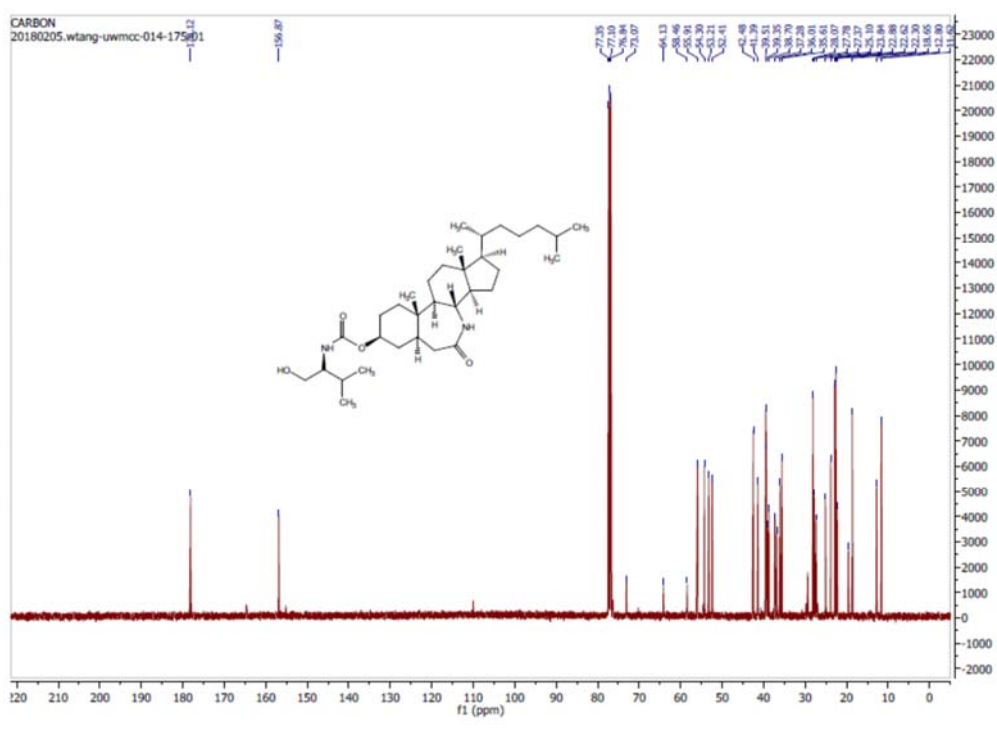

Supplementary Figure 130.  $^1\text{H}$  and  $^{13}\text{C}$  spectra of 41bn.

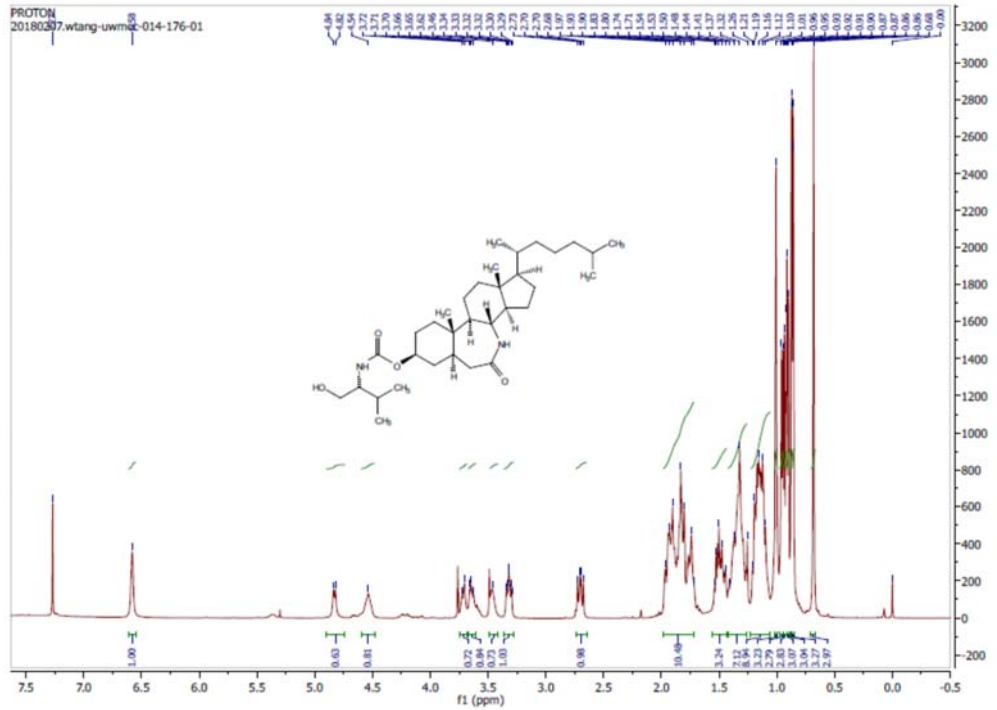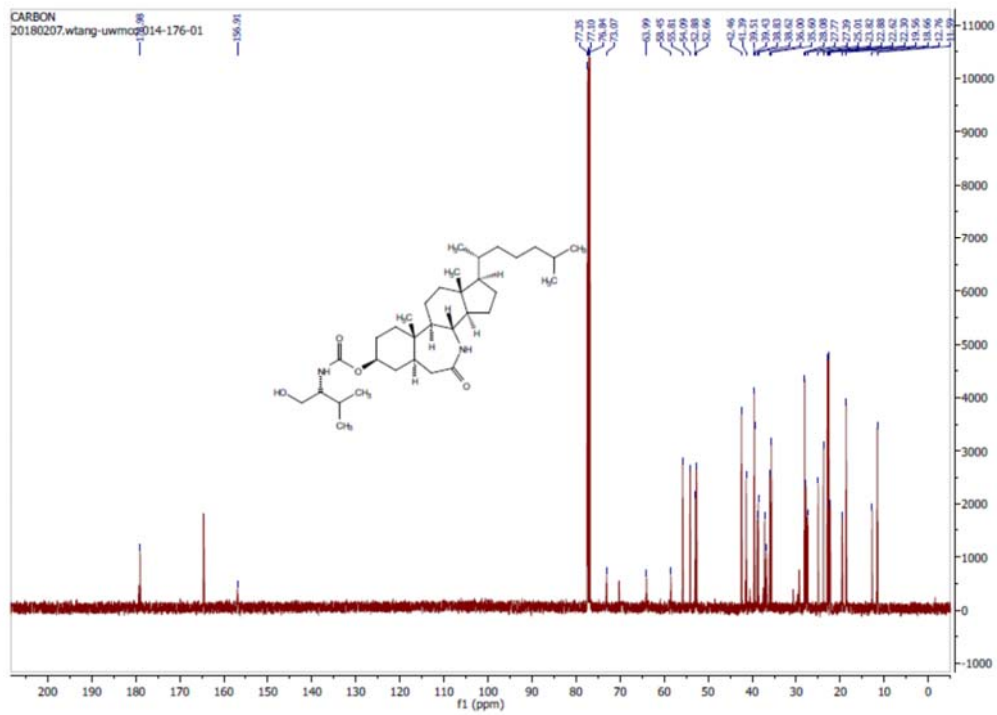

Supplementary Figure 131.  $^1\text{H}$  and  $^{13}\text{C}$  spectra of 41bo.

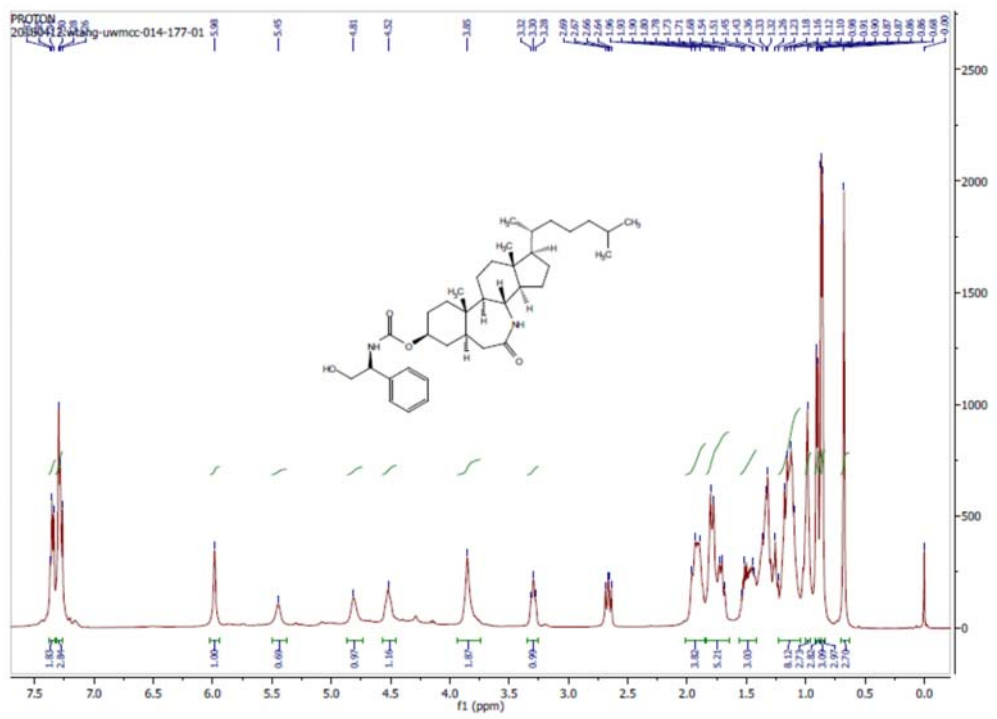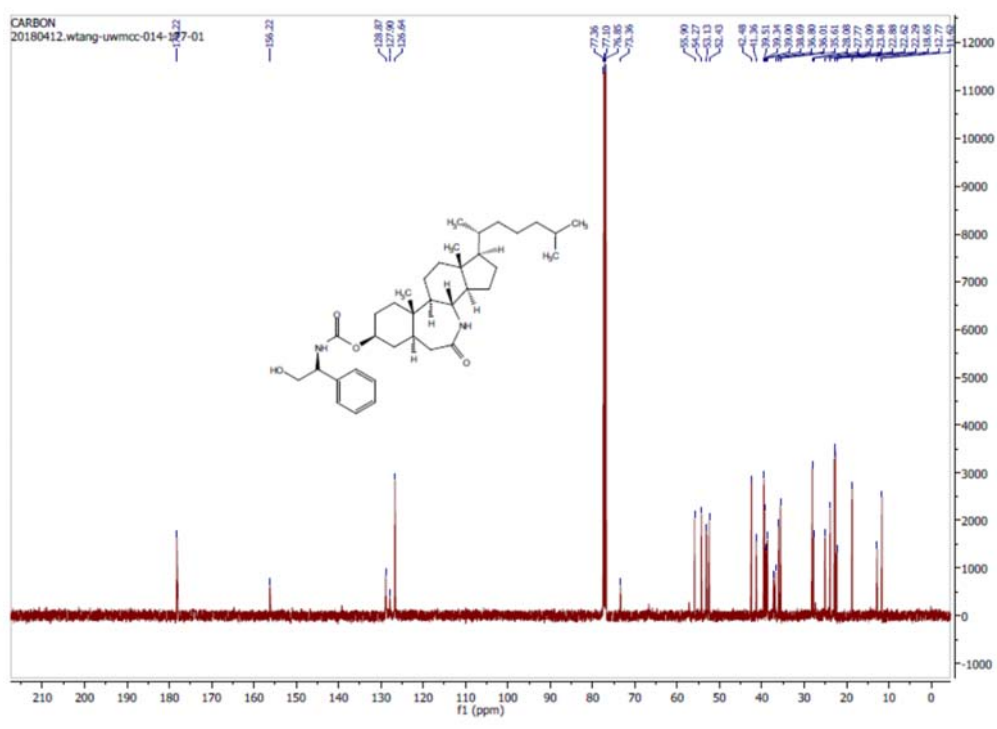

Supplementary Figure 132.  $^1\text{H}$  and  $^{13}\text{C}$  spectra of 41bp.

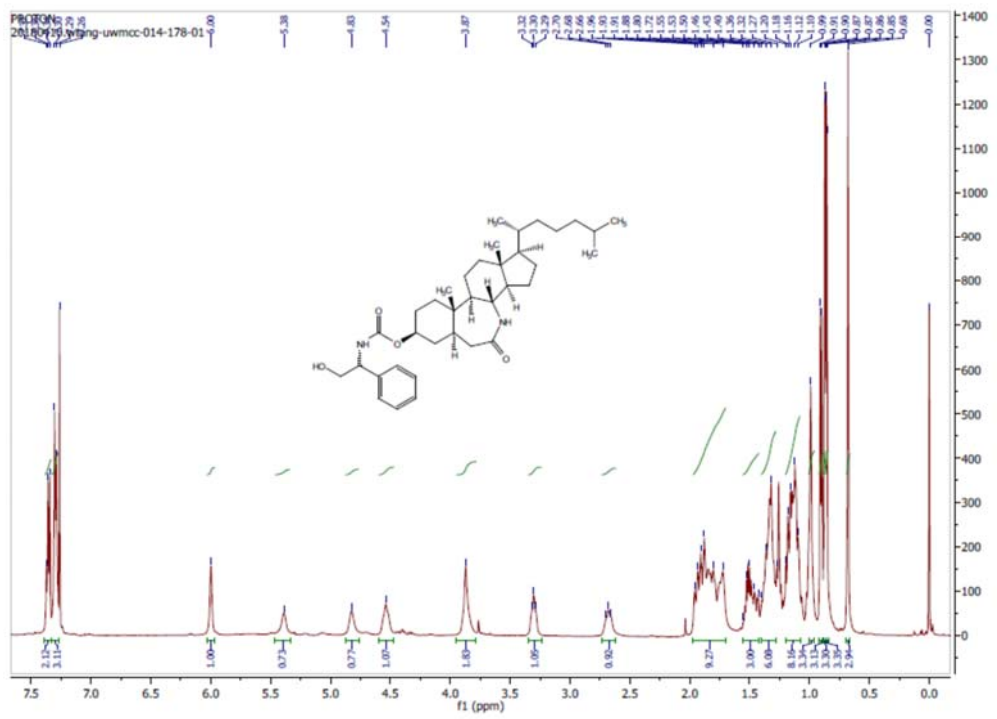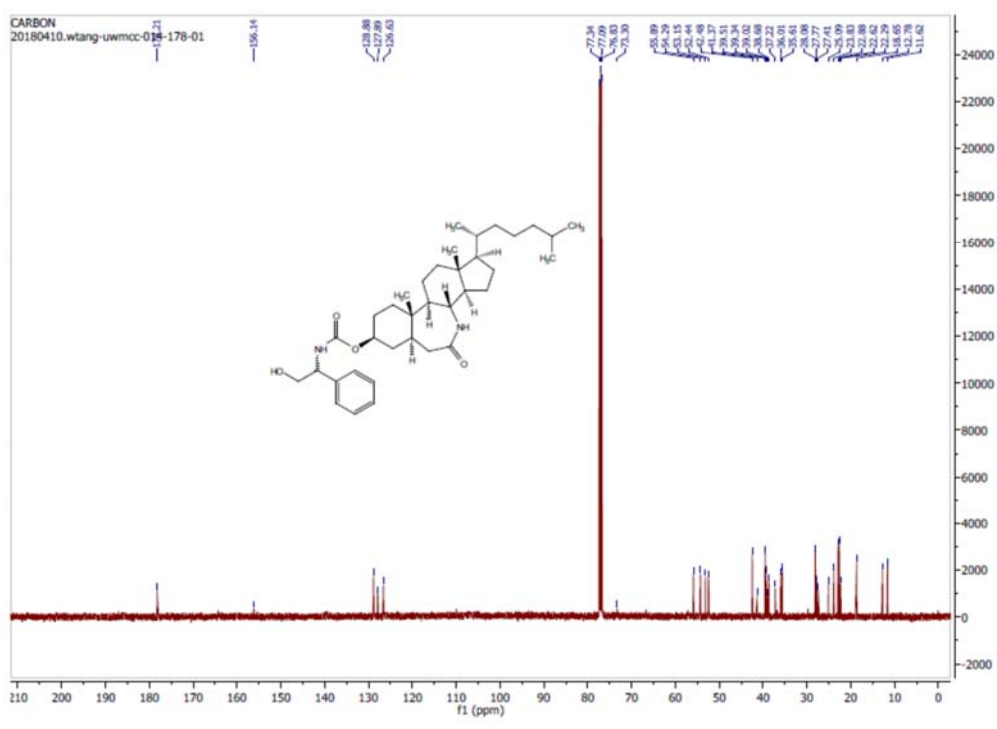

Supplementary Figure 133.  $^1\text{H}$  and  $^{13}\text{C}$  spectra of 41bq.

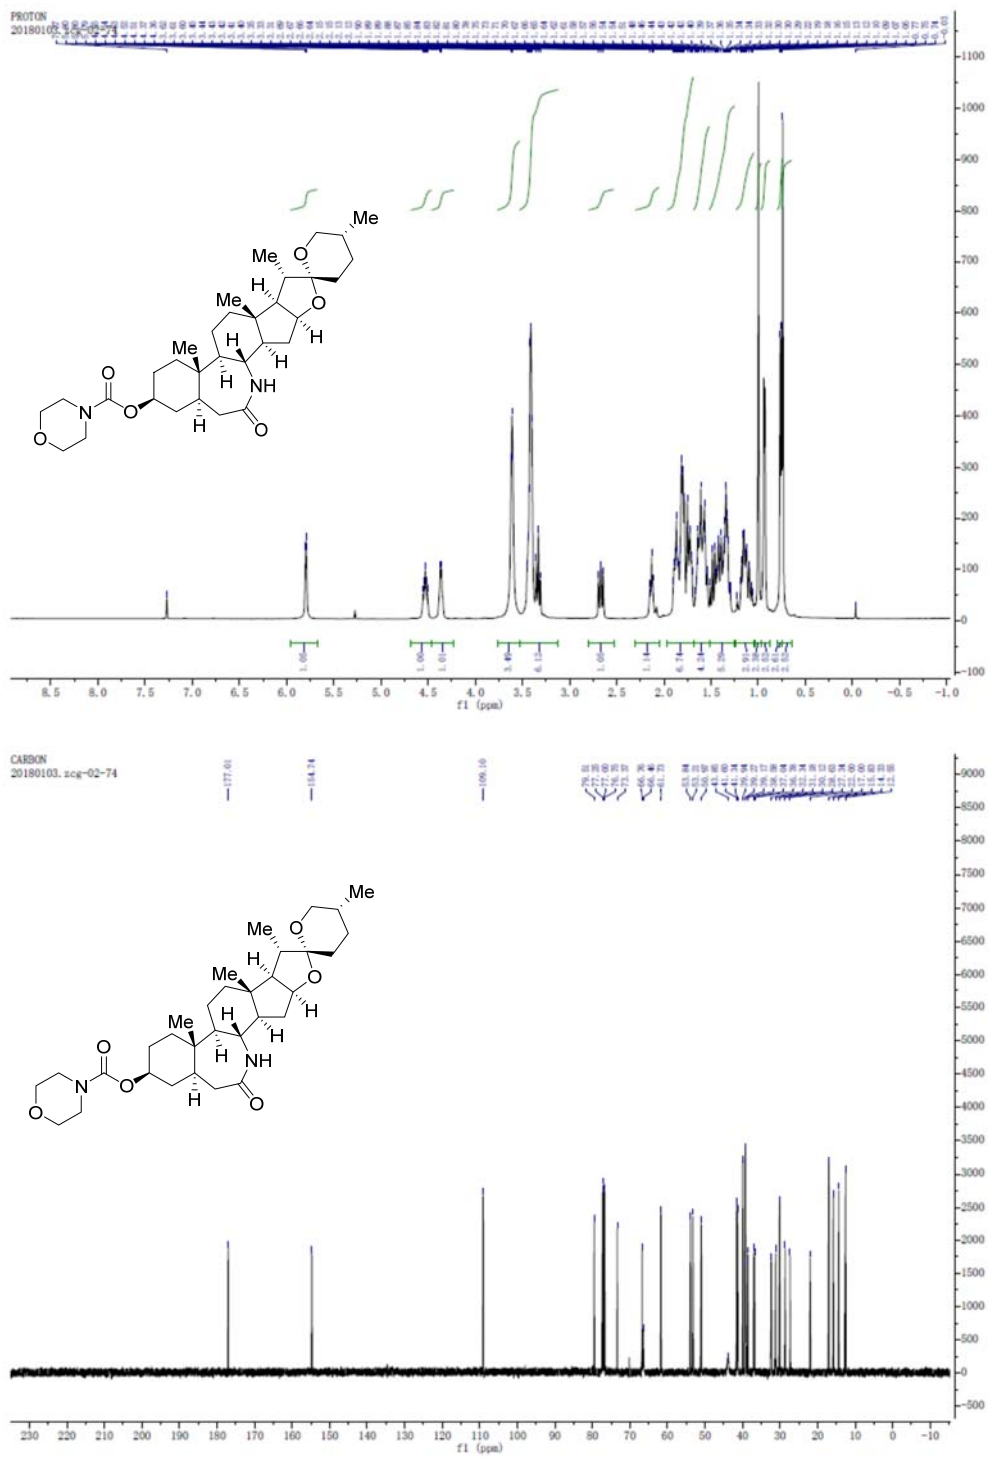

Supplementary Figure 134.  $^1\text{H}$  and  $^{13}\text{C}$  spectra of 41ca.



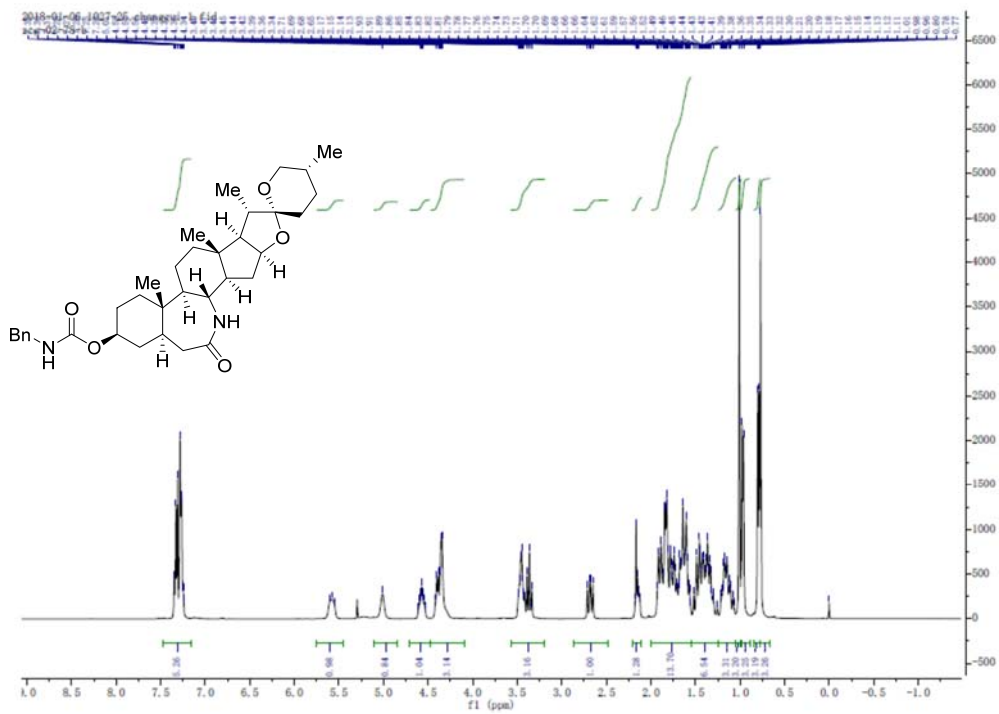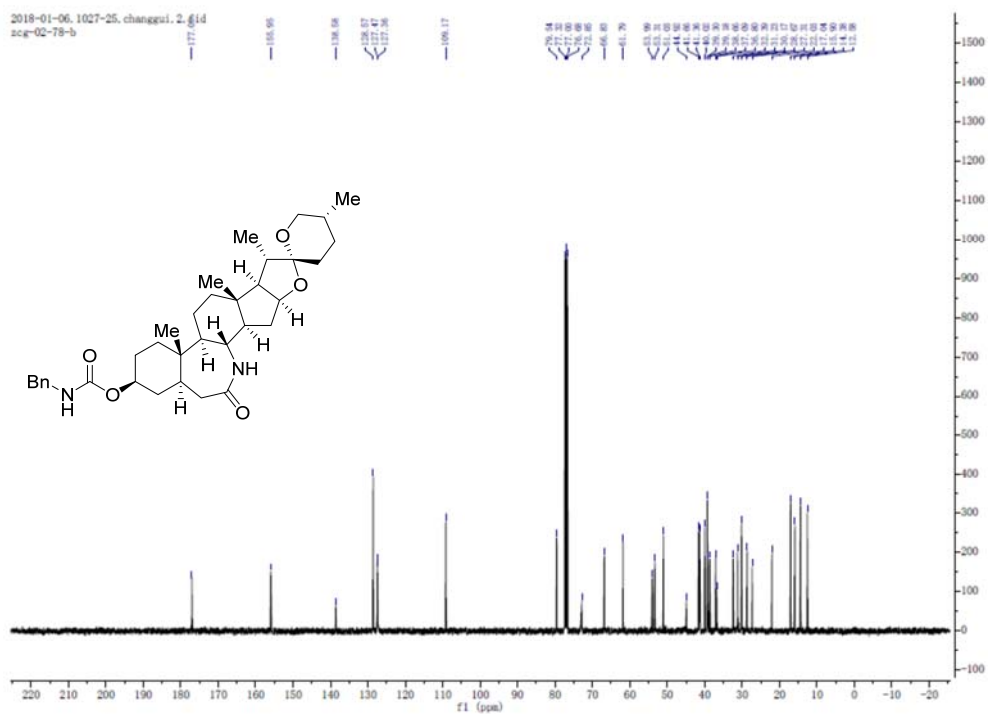

Supplementary Figure 136.  $^1\text{H}$  and  $^{13}\text{C}$  spectra of 41cc.

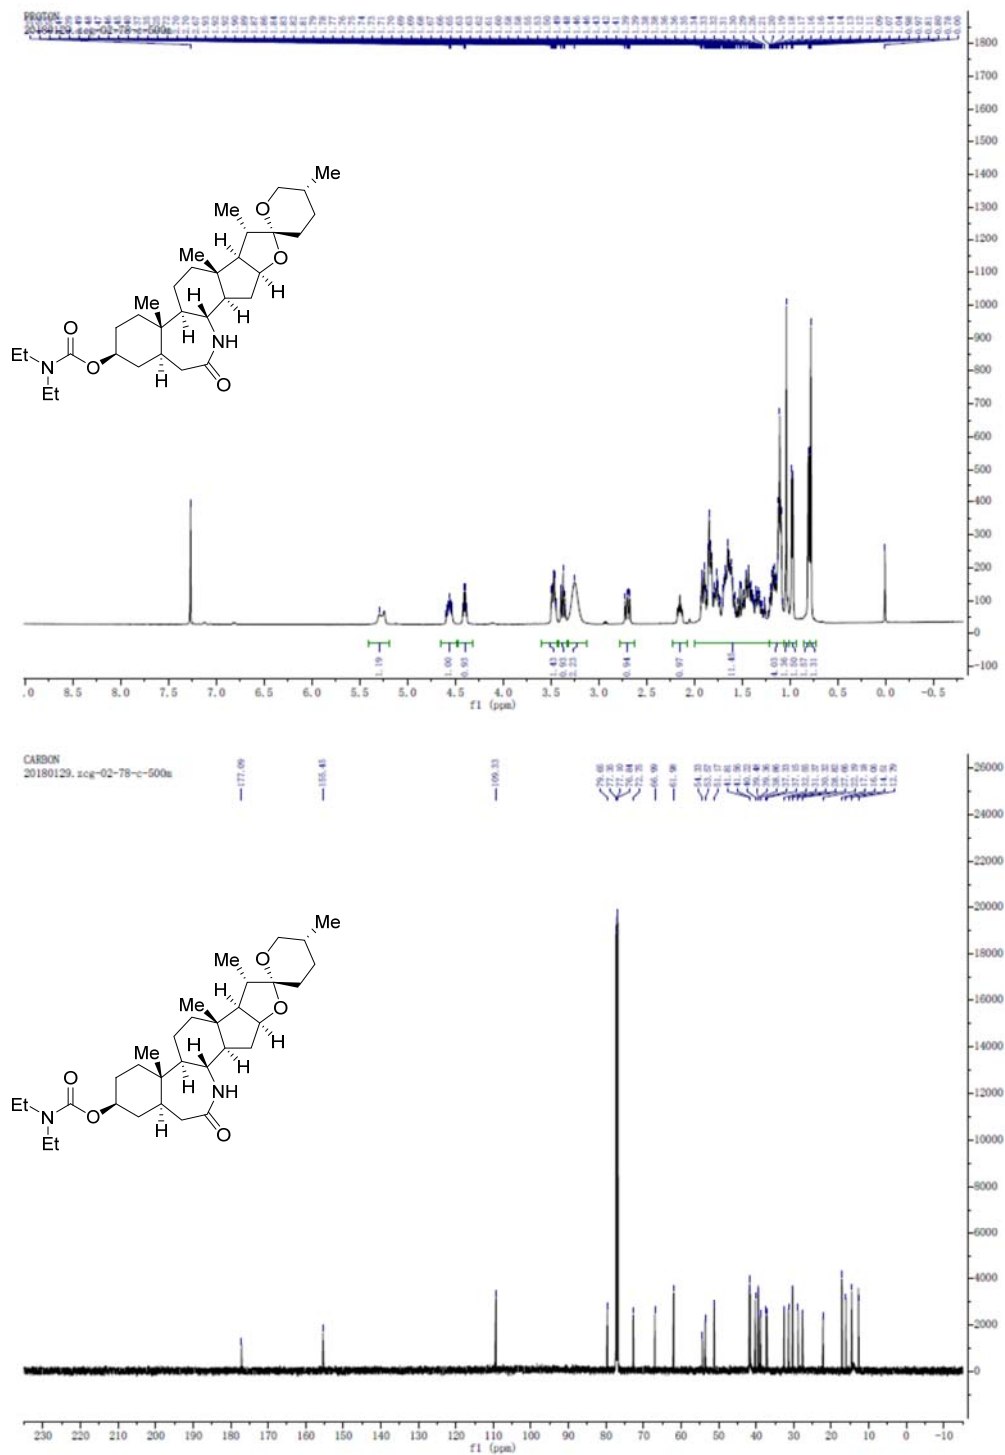

Supplementary Figure 137. <sup>1</sup>H and <sup>13</sup>C spectra of 41cd.



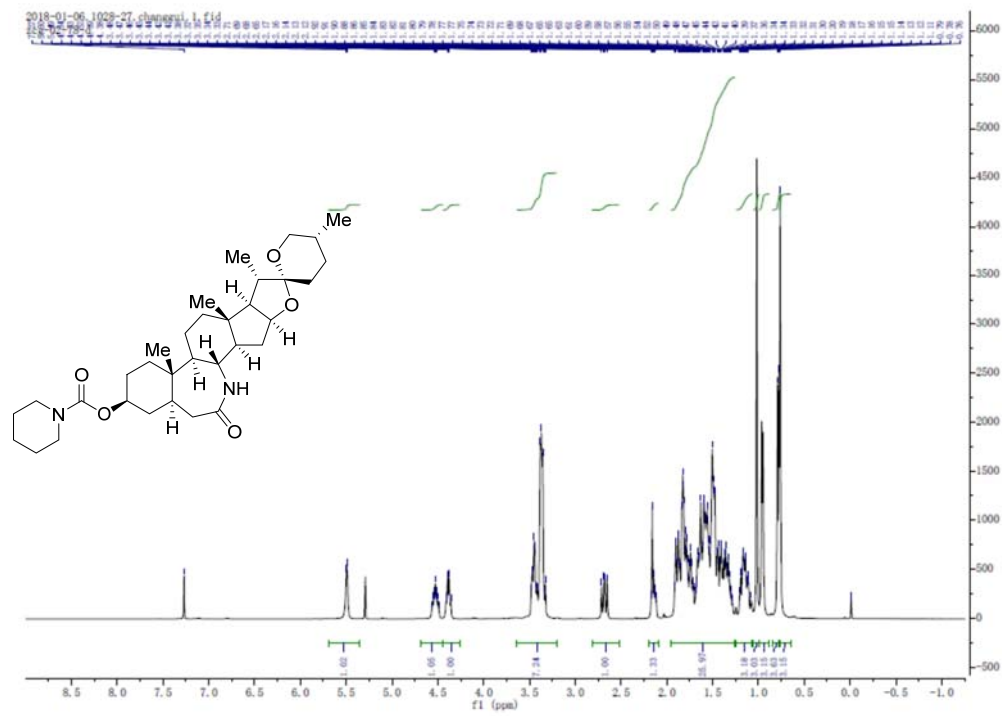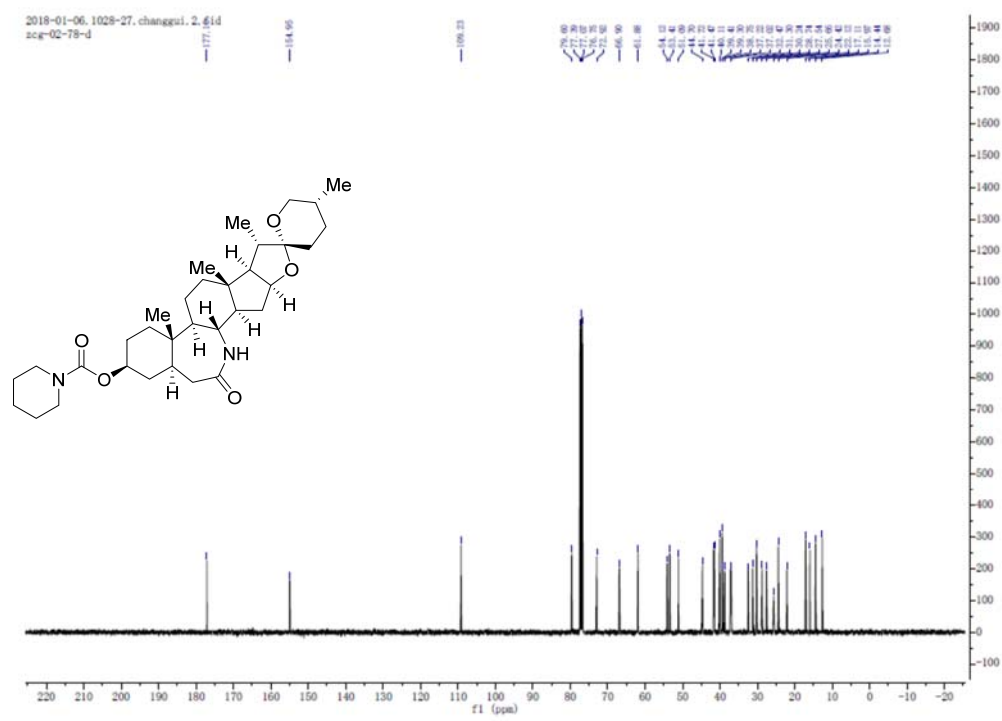

Supplementary Figure 138.  $^1\text{H}$  and  $^{13}\text{C}$  spectra of 41ce.

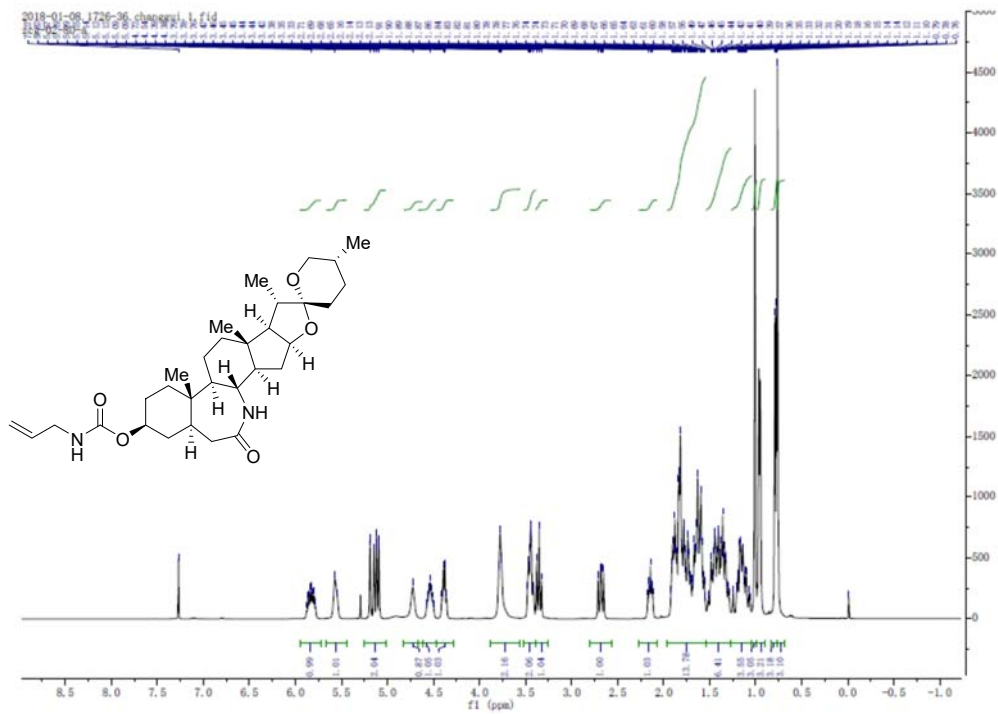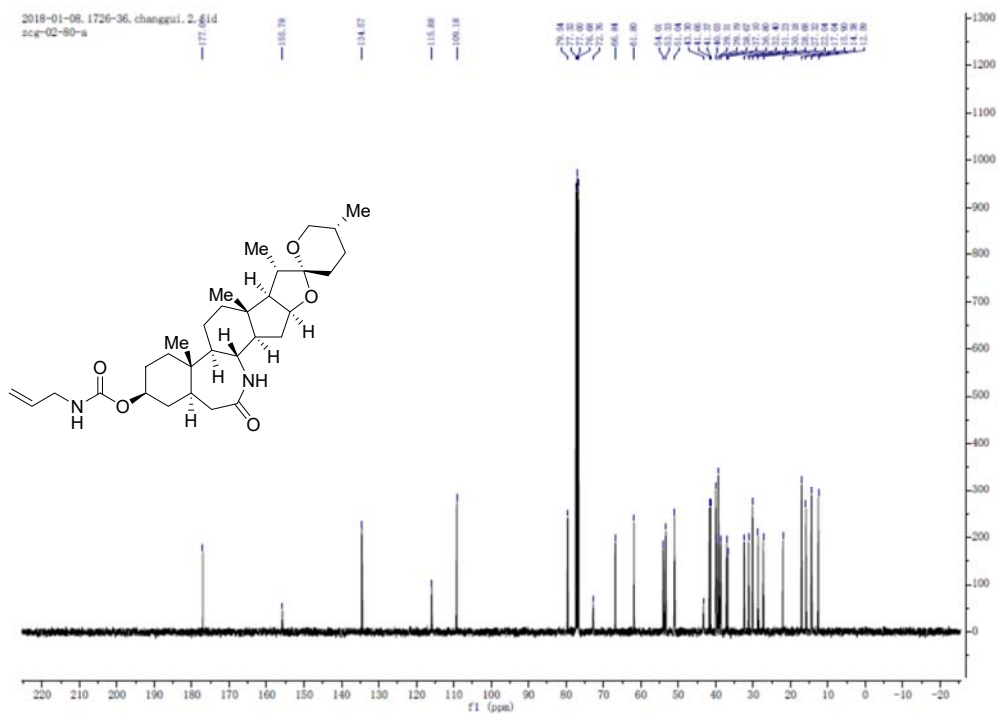

Supplementary Figure 139.  $^1\text{H}$  and  $^{13}\text{C}$  spectra of 41cf.



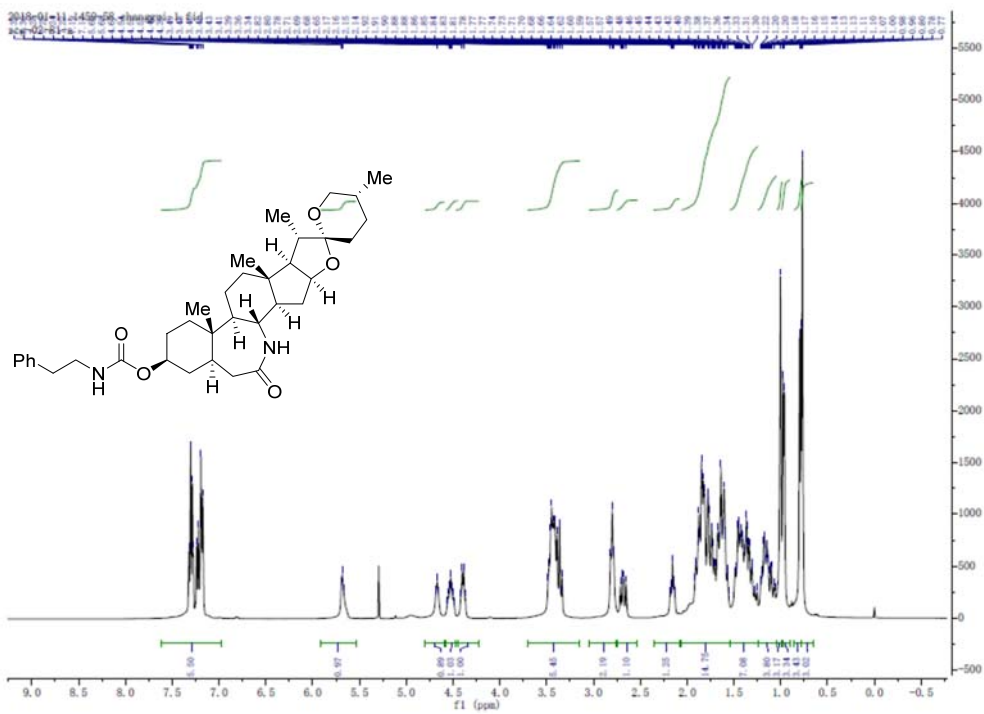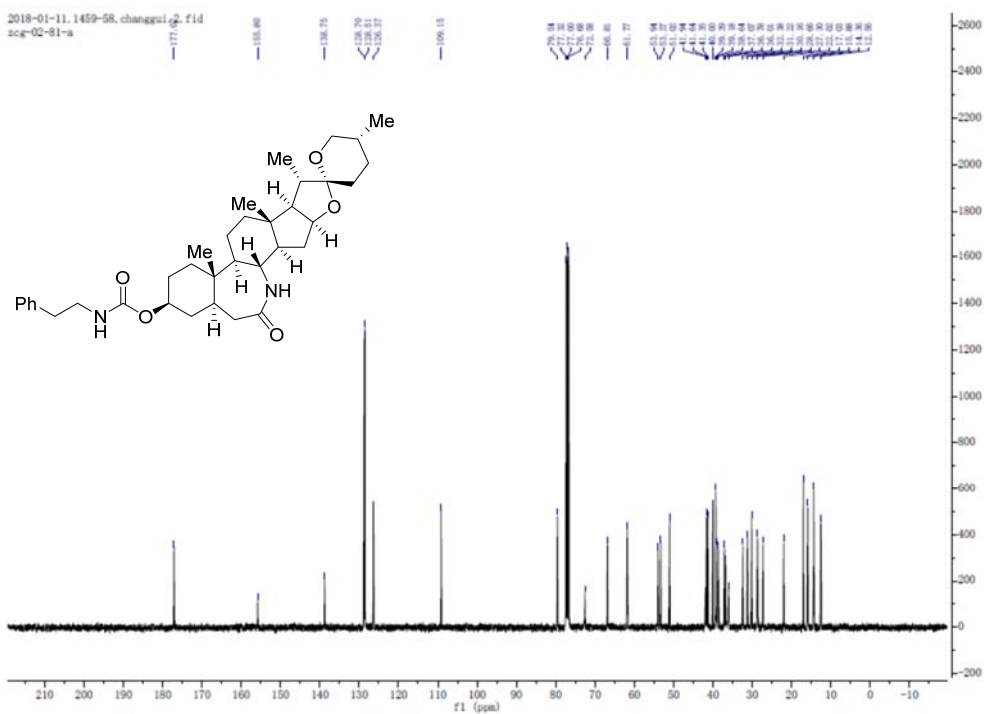

Supplementary Figure 141.  $^1\text{H}$  and  $^{13}\text{C}$  spectra of 41ch.

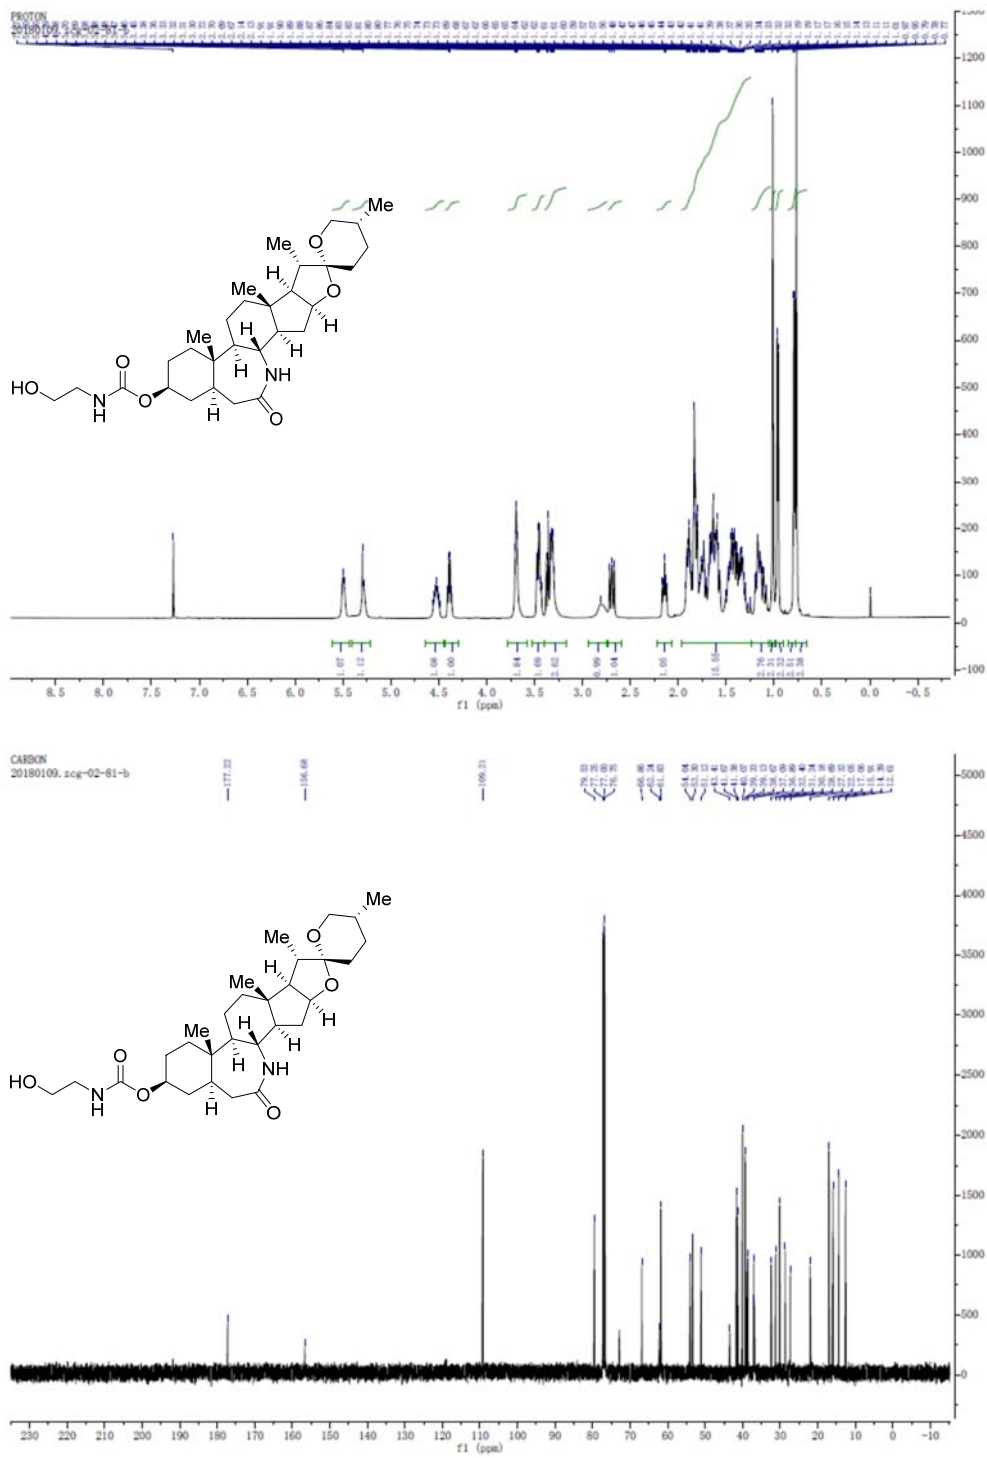

Supplementary Figure 142. <sup>1</sup>H and <sup>13</sup>C spectra of 41ci.

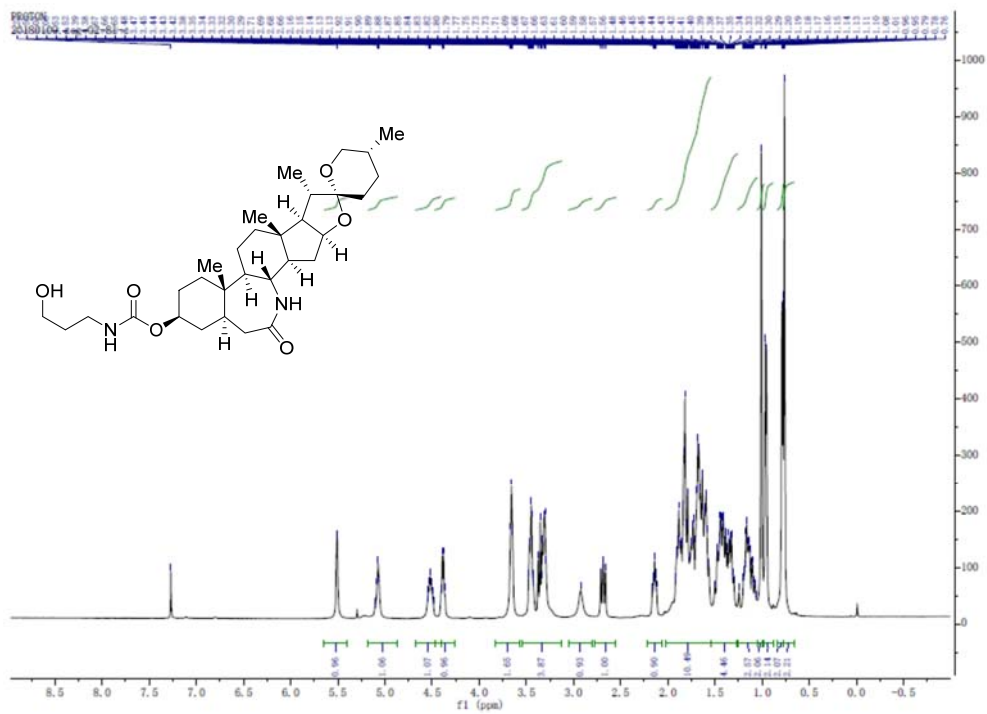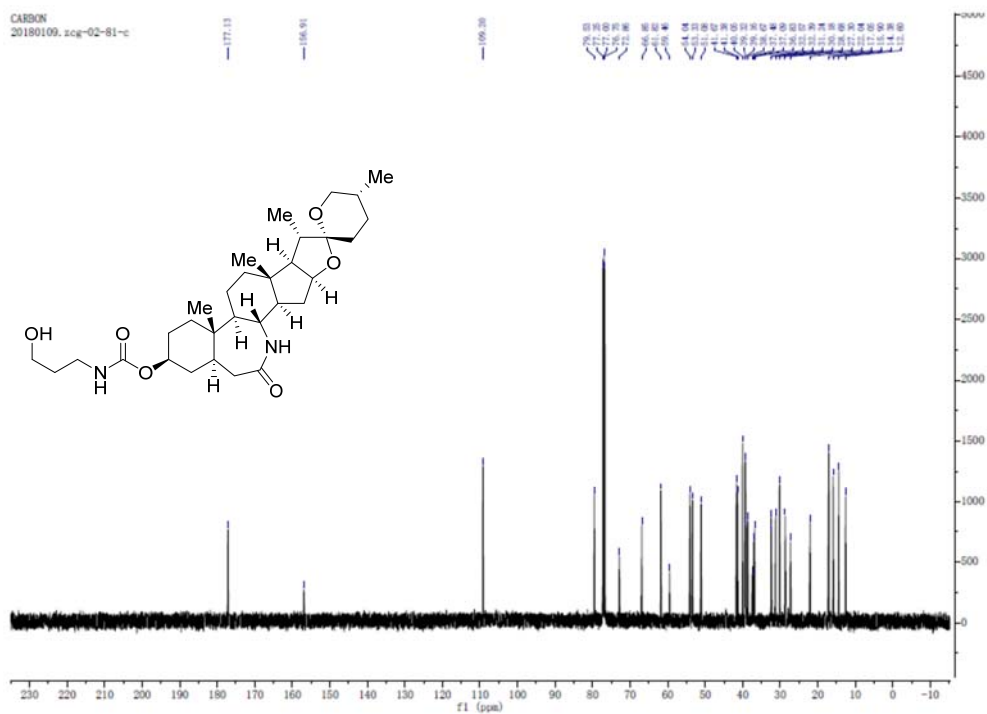

Supplementary Figure 143.  $^1\text{H}$  and  $^{13}\text{C}$  spectra of 41cj.

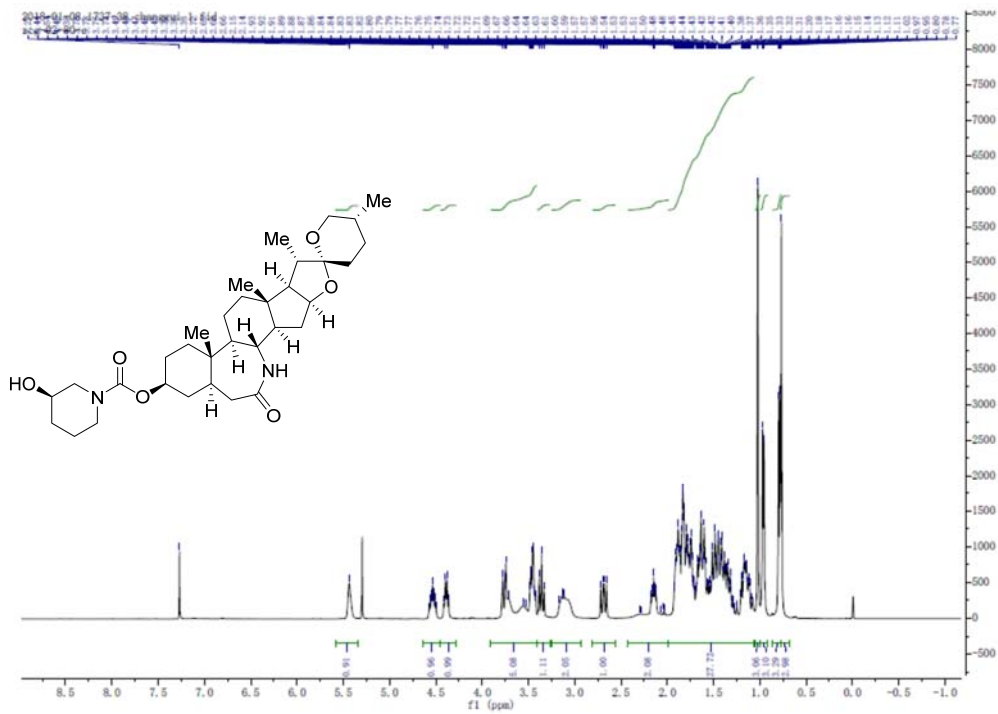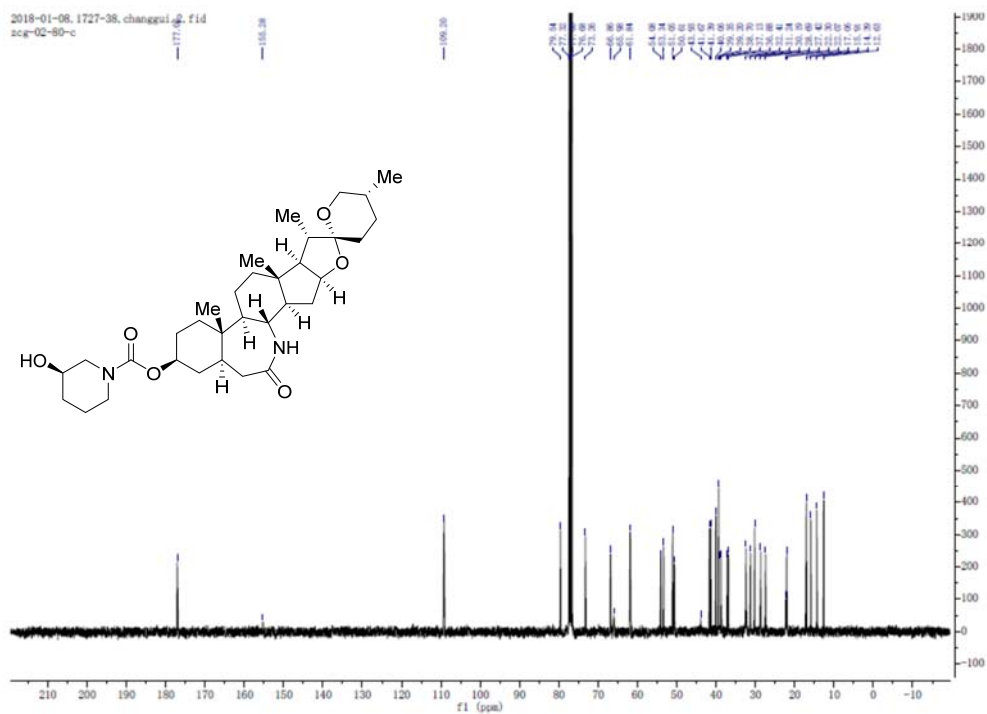

Supplementary Figure 144.  $^1\text{H}$  and  $^{13}\text{C}$  spectra of 41ck.

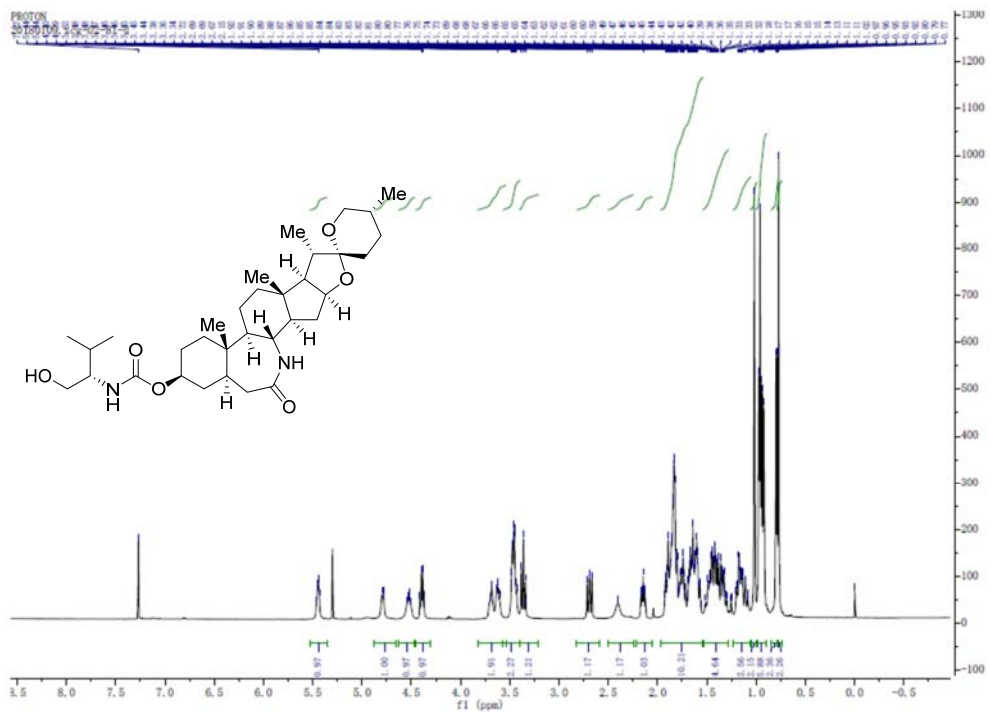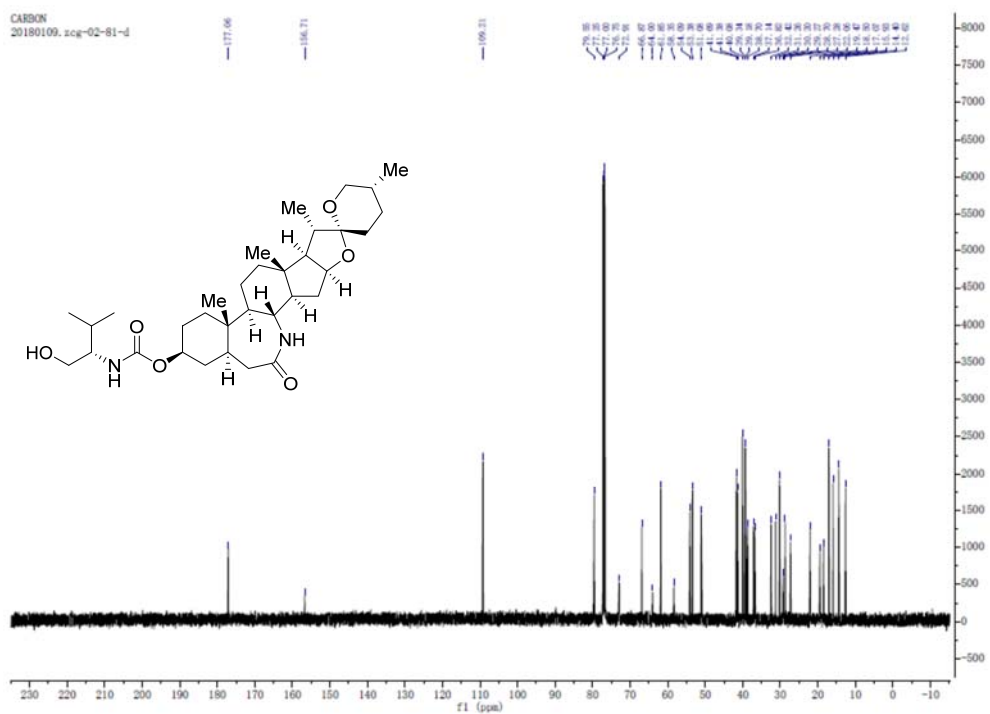

Supplementary Figure 145.  $^1\text{H}$  and  $^{13}\text{C}$  spectra of 41cl.



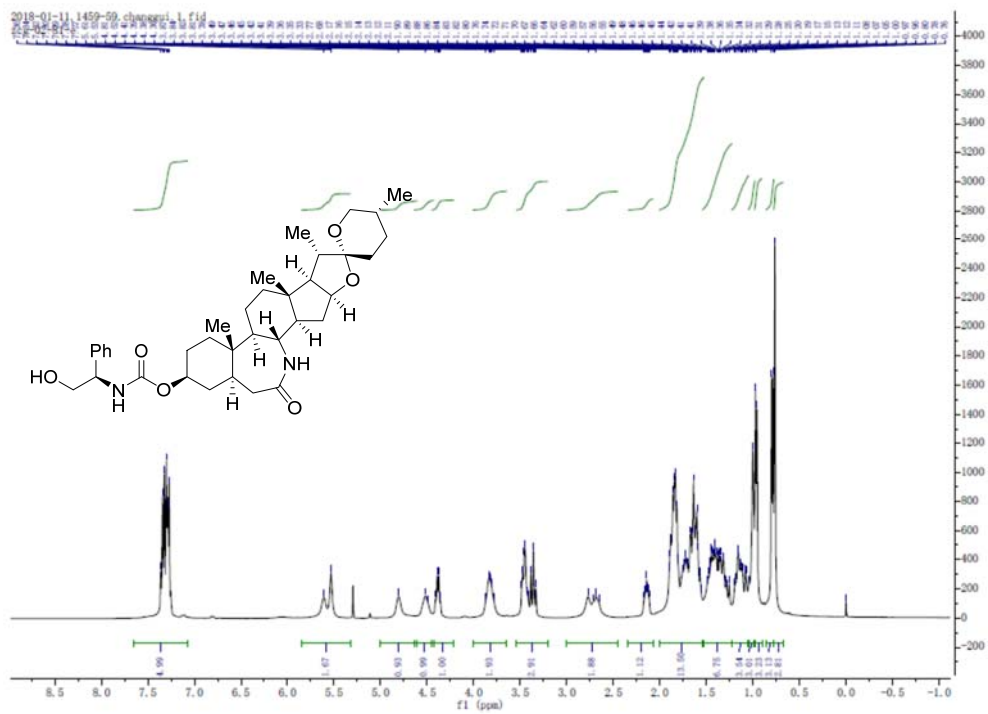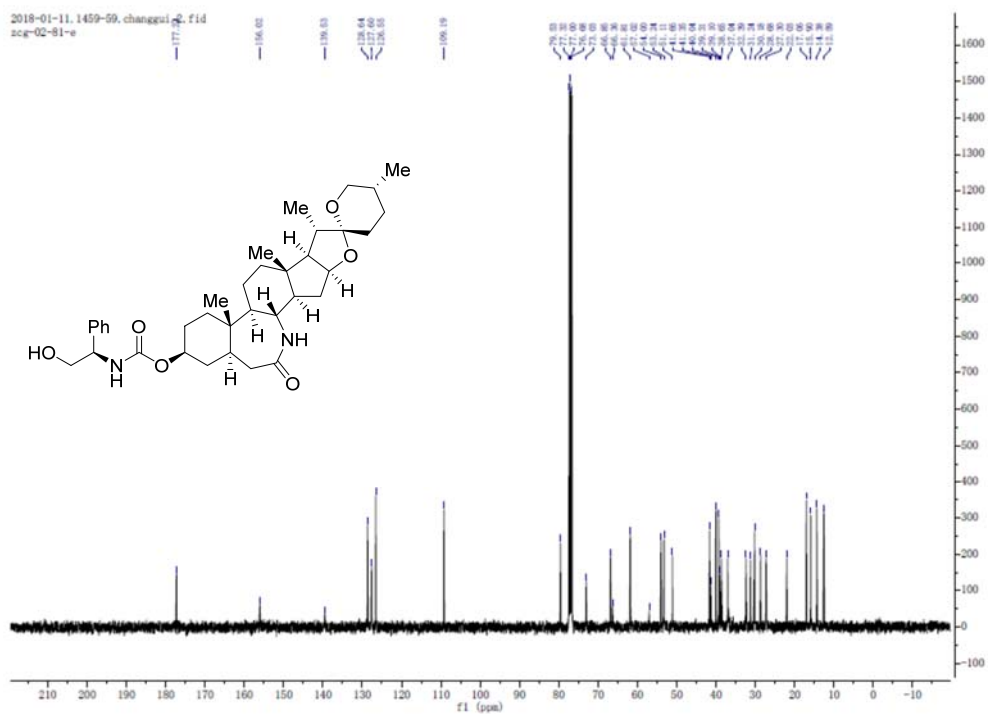

Supplementary Figure 146. <sup>1</sup>H and <sup>13</sup>C spectra of 41cm.

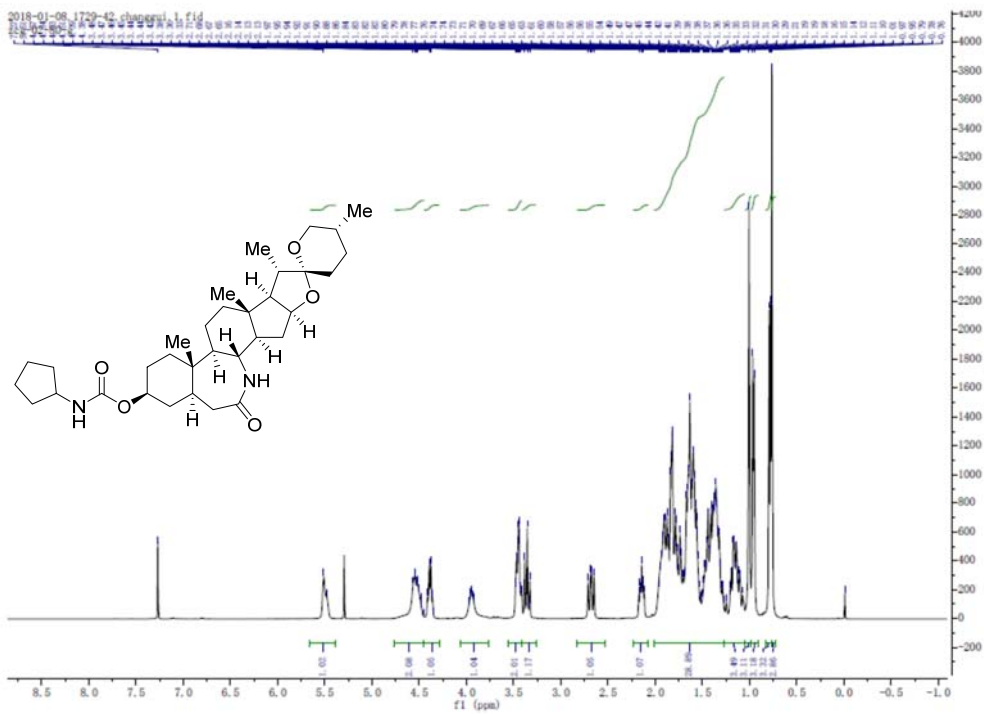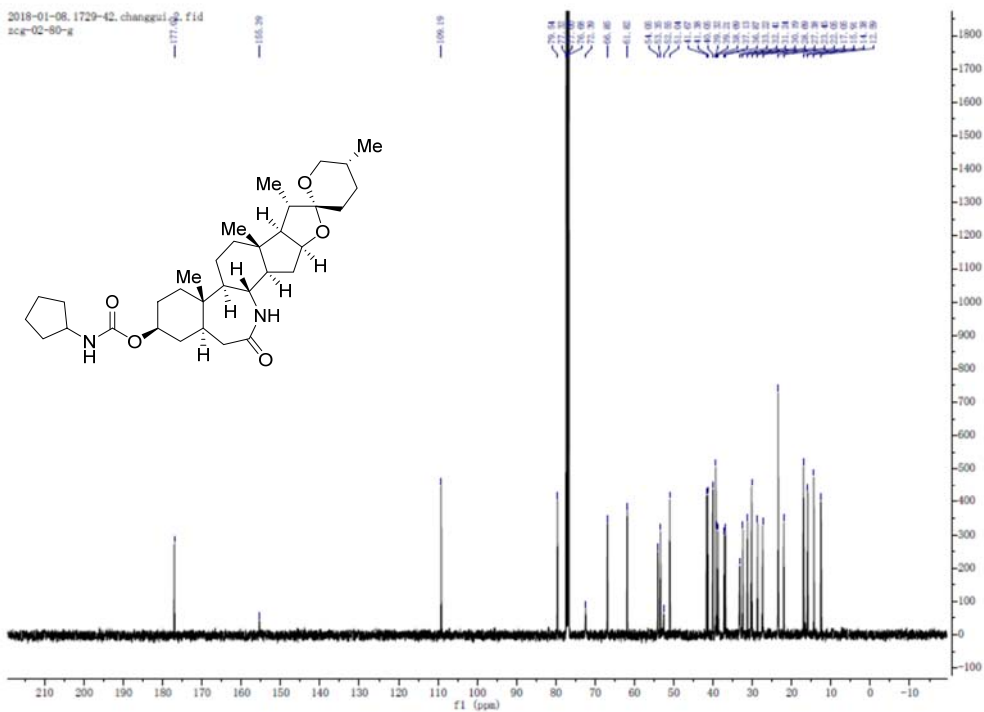

Supplementary Figure 147.  $^1\text{H}$  and  $^{13}\text{C}$  spectra of 41cn.

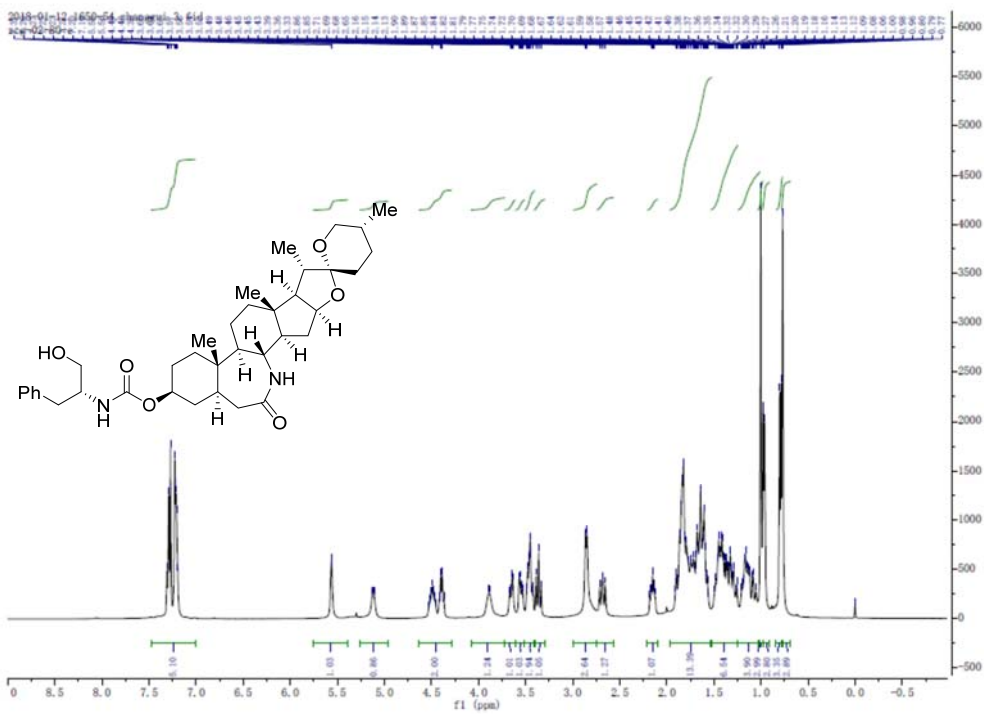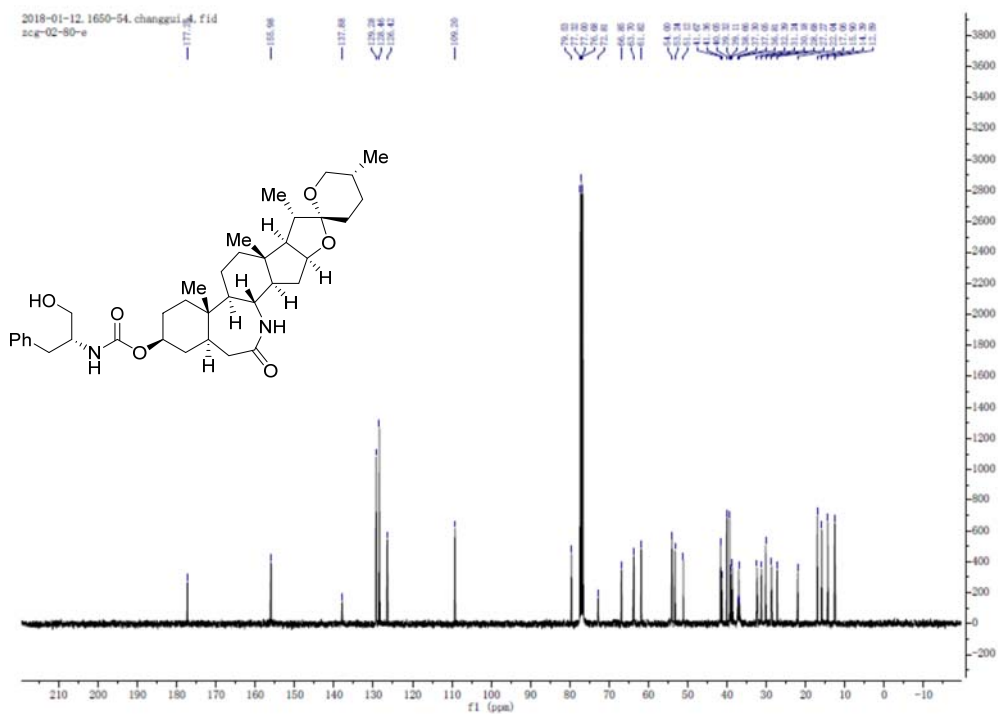

Supplementary Figure 148.  $^1\text{H}$  and  $^{13}\text{C}$  spectra of 41co.



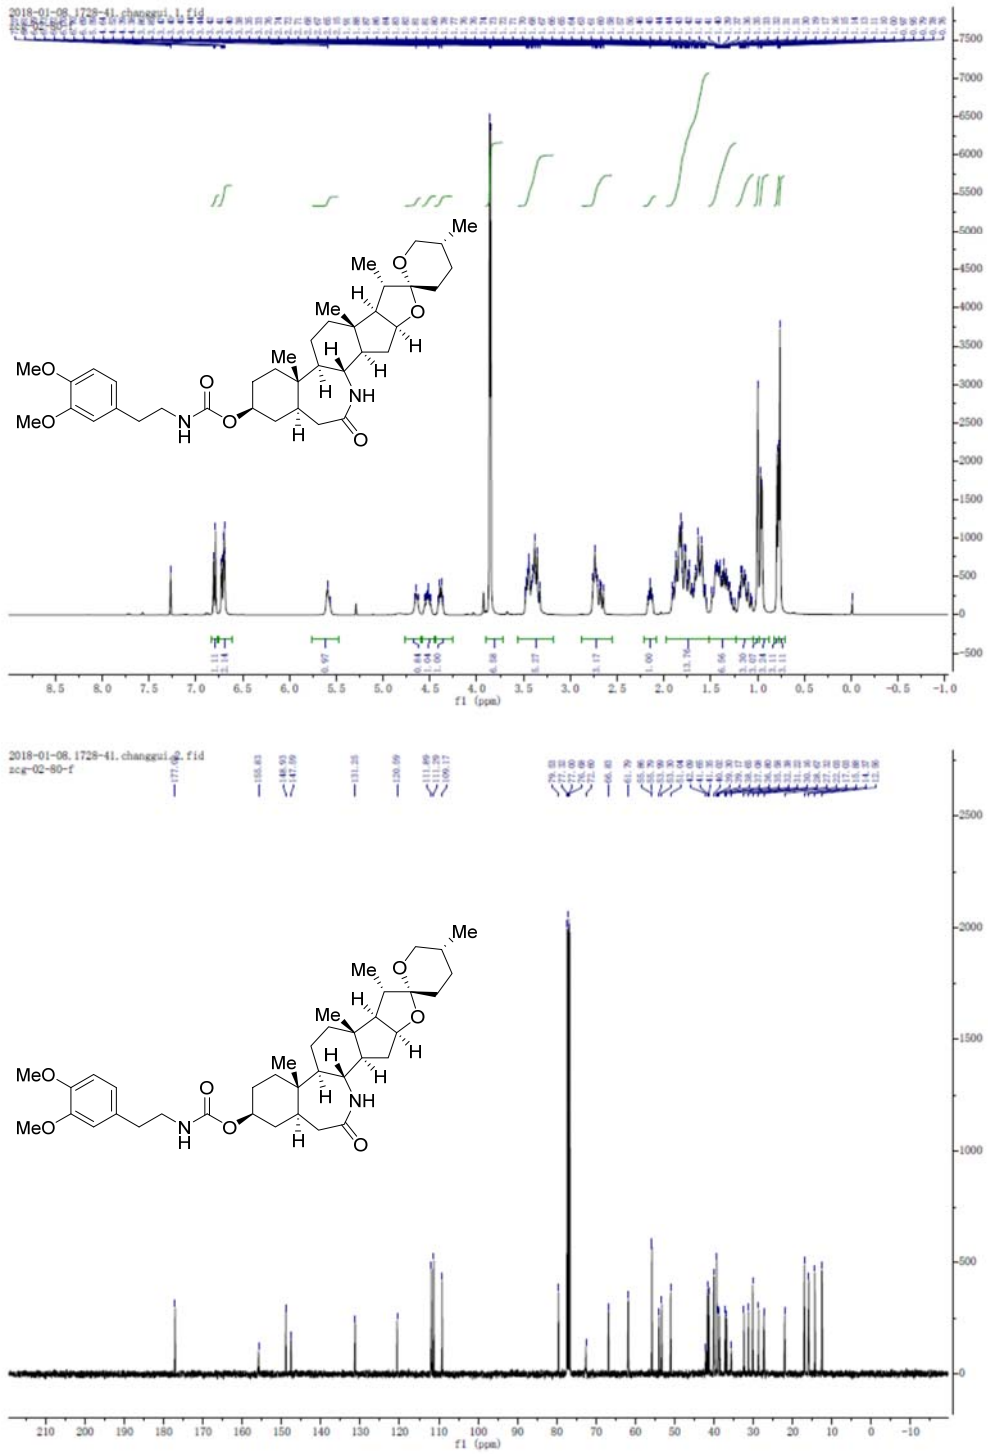

Supplementary Figure 150.  $^1\text{H}$  and  $^{13}\text{C}$  spectra of **41cq**.



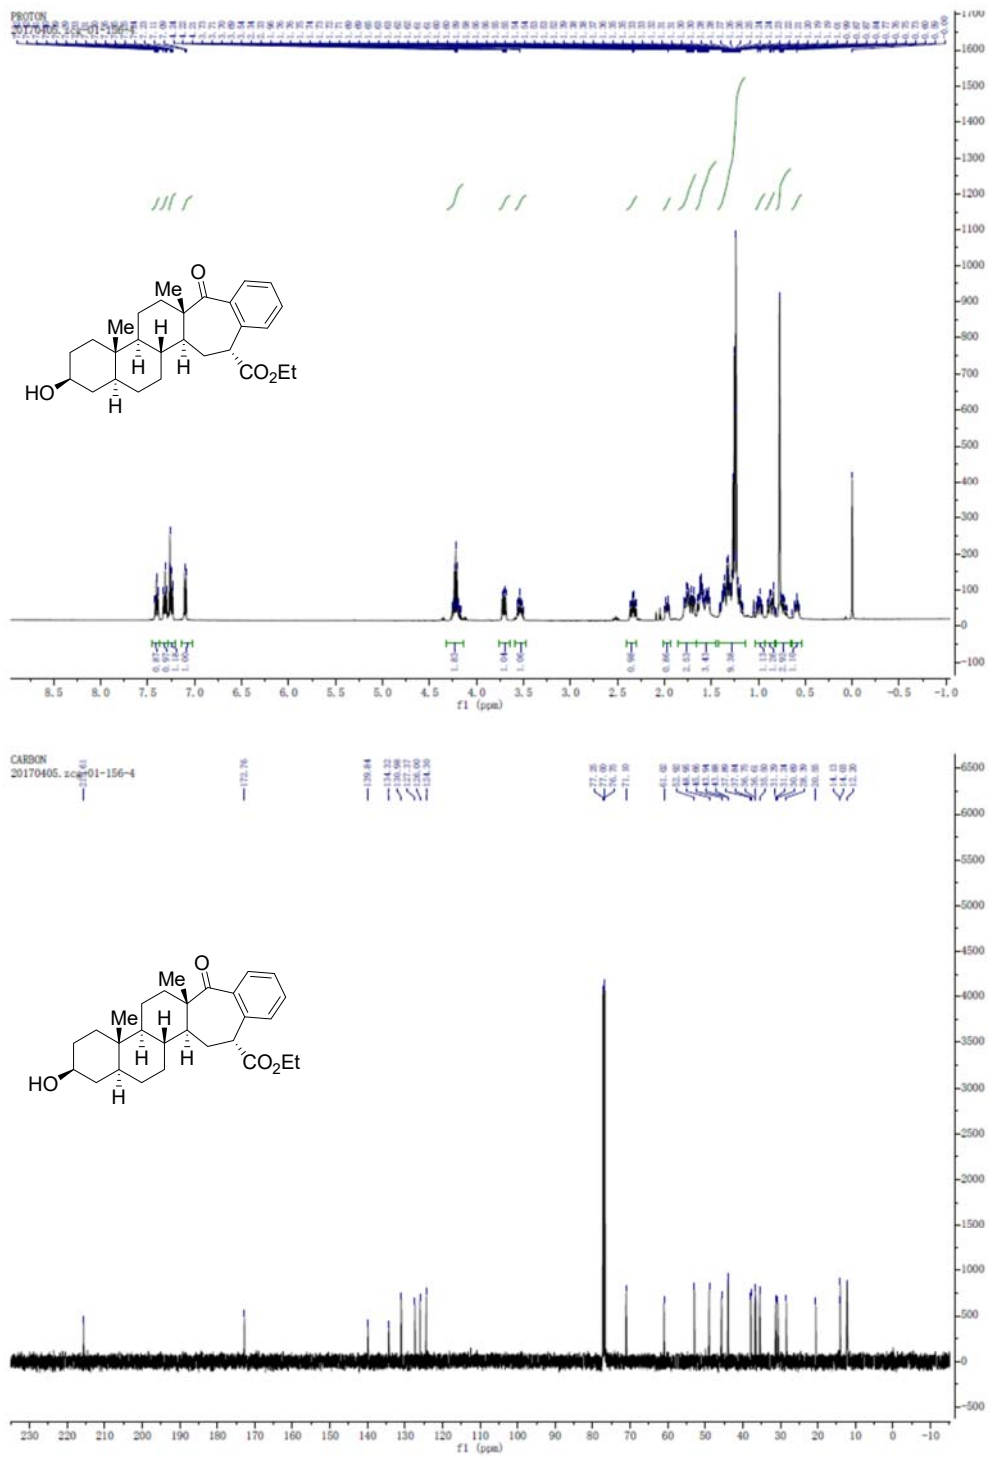

Supplementary Figure 152.  $^1\text{H}$  and  $^{13}\text{C}$  spectra of 42b.

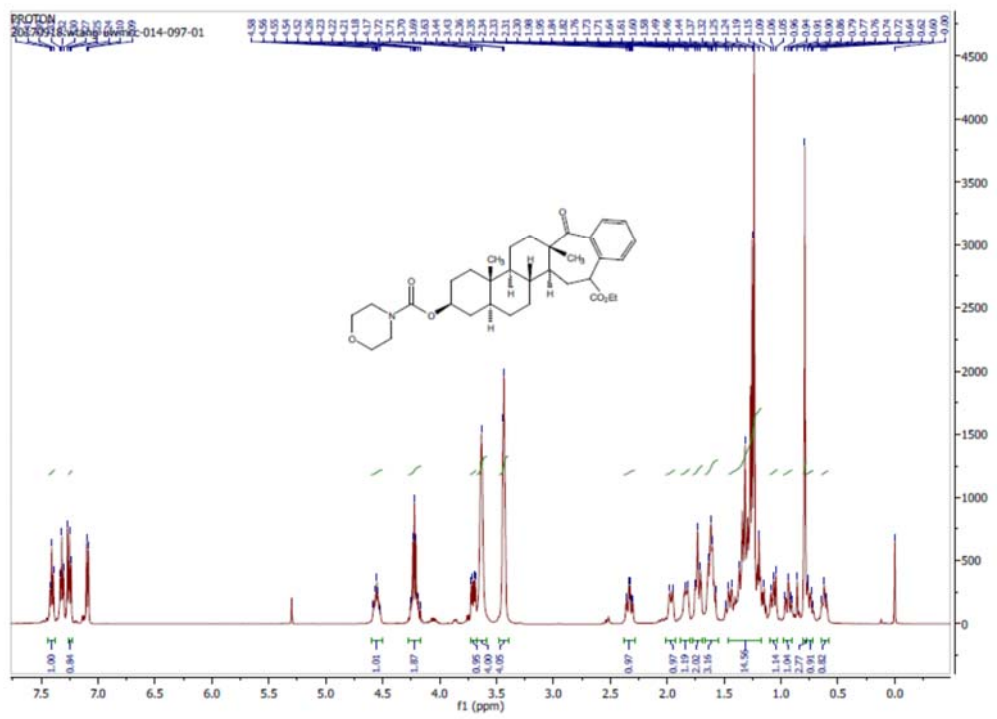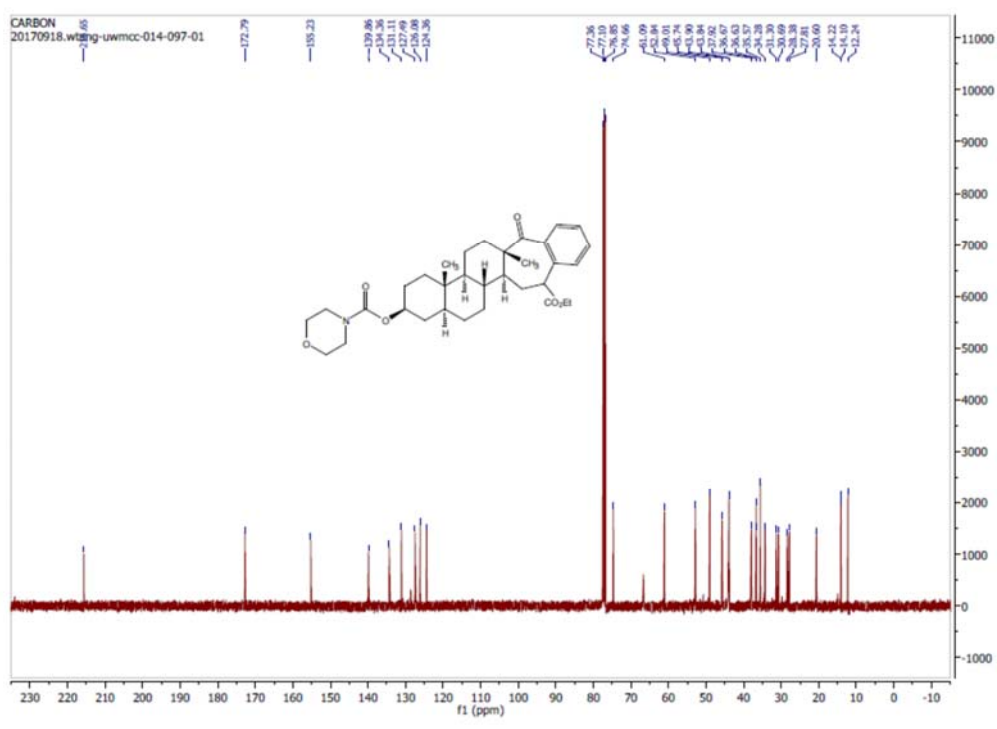

Supplementary Figure 153.  $^1\text{H}$  and  $^{13}\text{C}$  spectra of 42c.



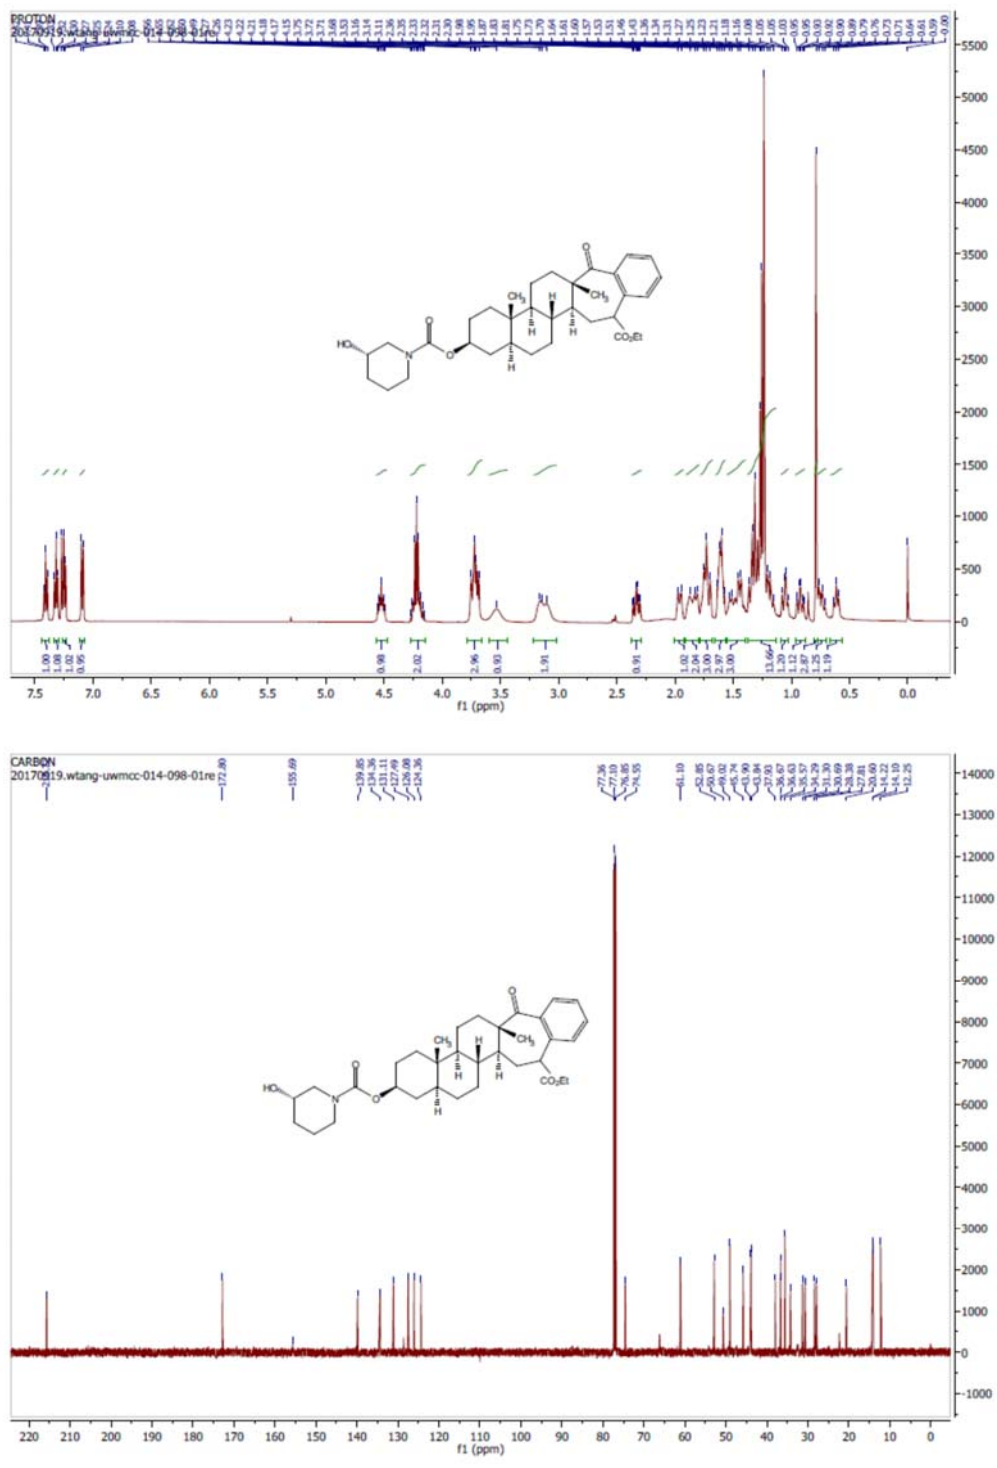

Supplementary Figure 154. <sup>1</sup>H and <sup>13</sup>C spectra of 42d.

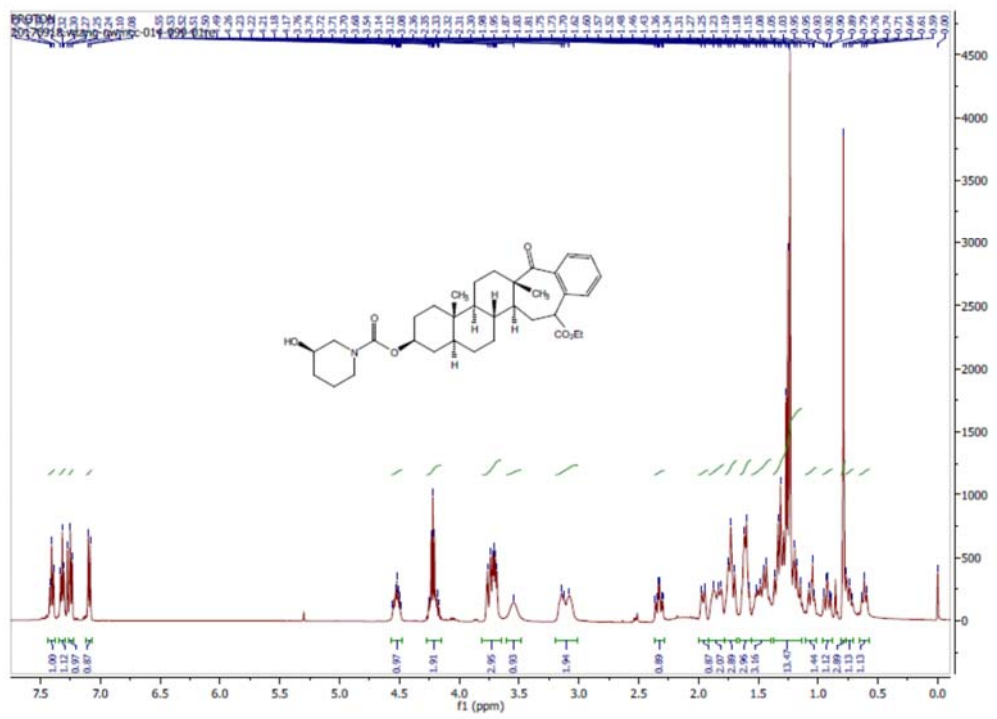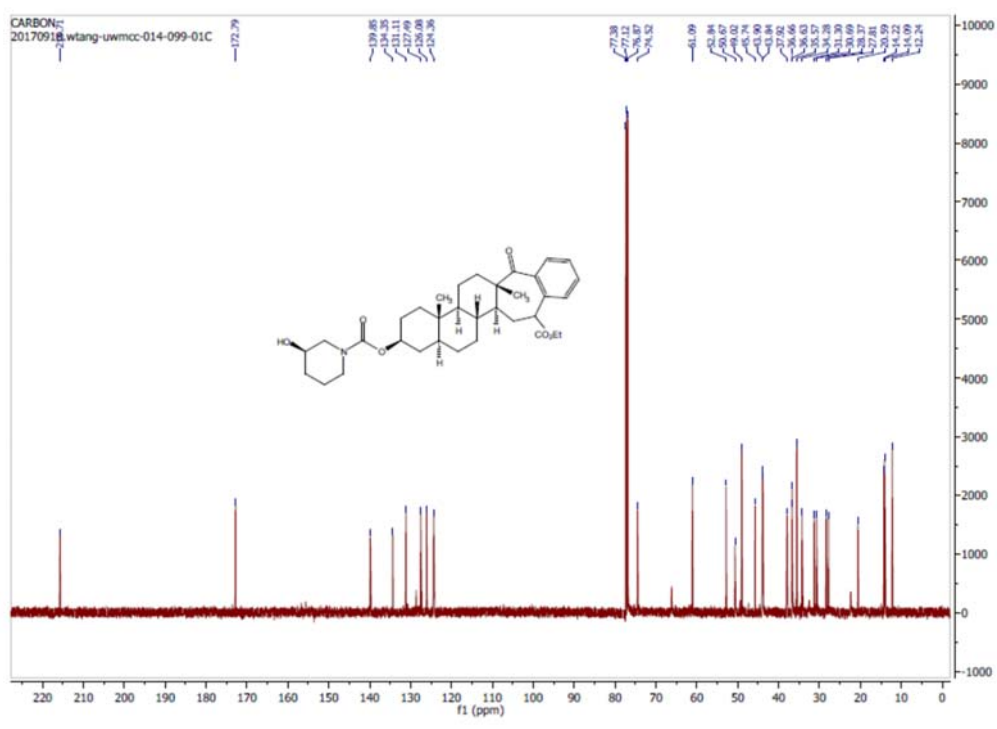

Supplementary Figure 155. <sup>1</sup>H and <sup>13</sup>C spectra of 42e.



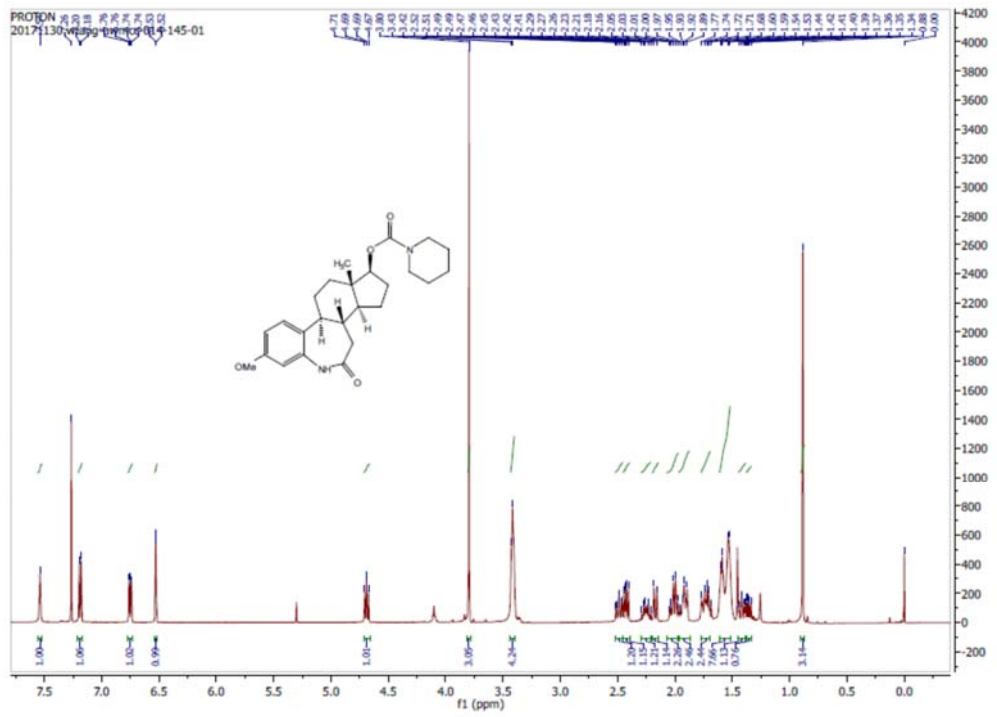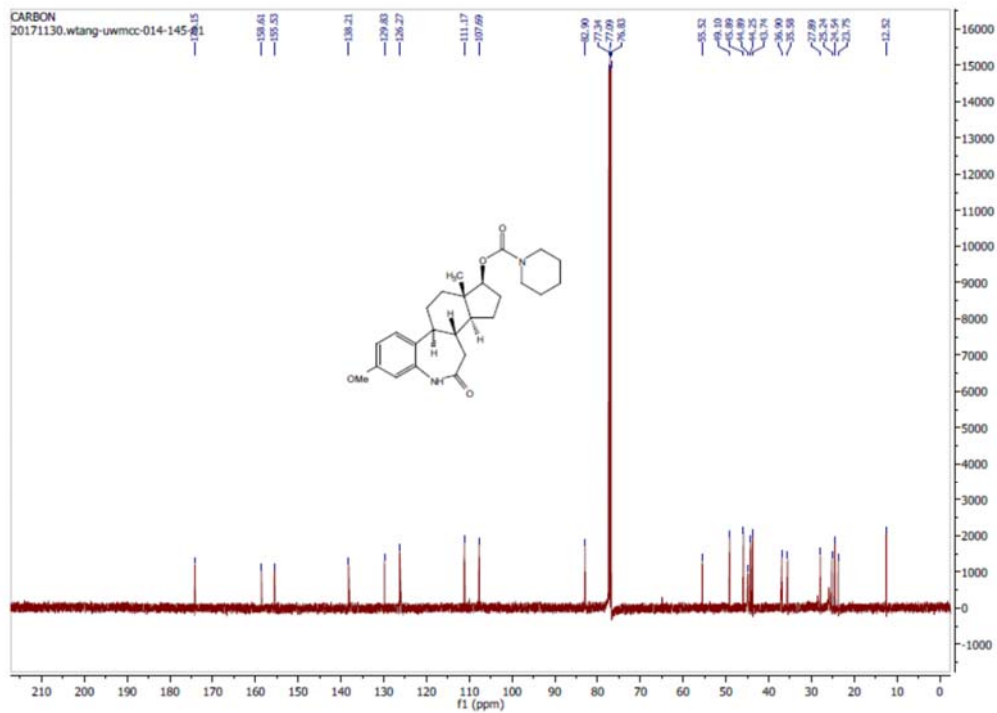

Supplementary Figure 157. <sup>1</sup>H and <sup>13</sup>C spectra of 43b.

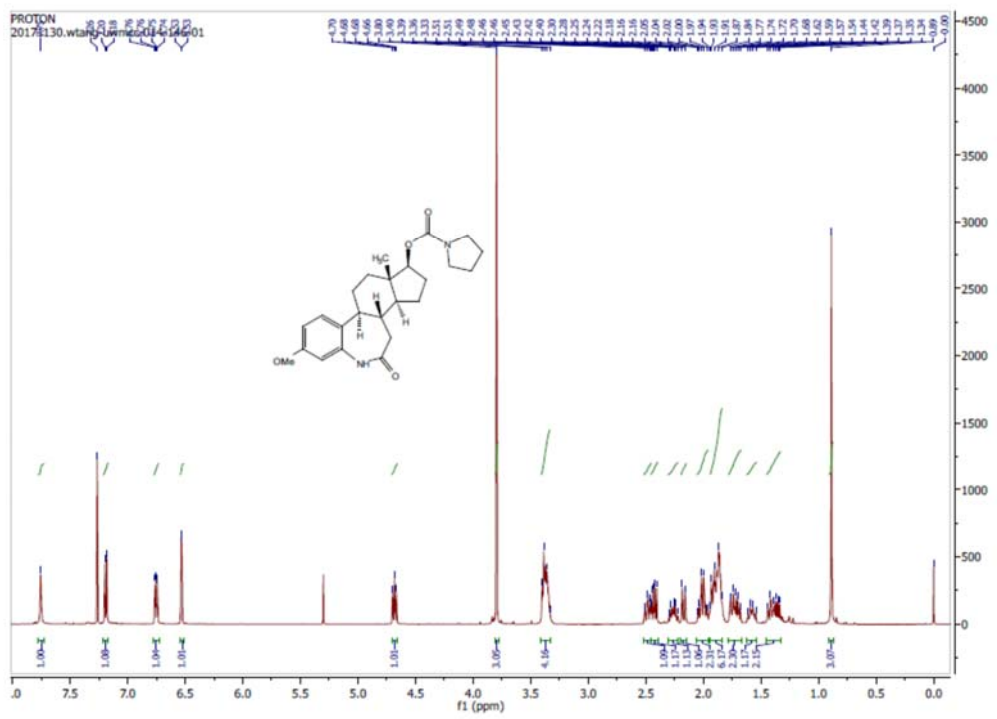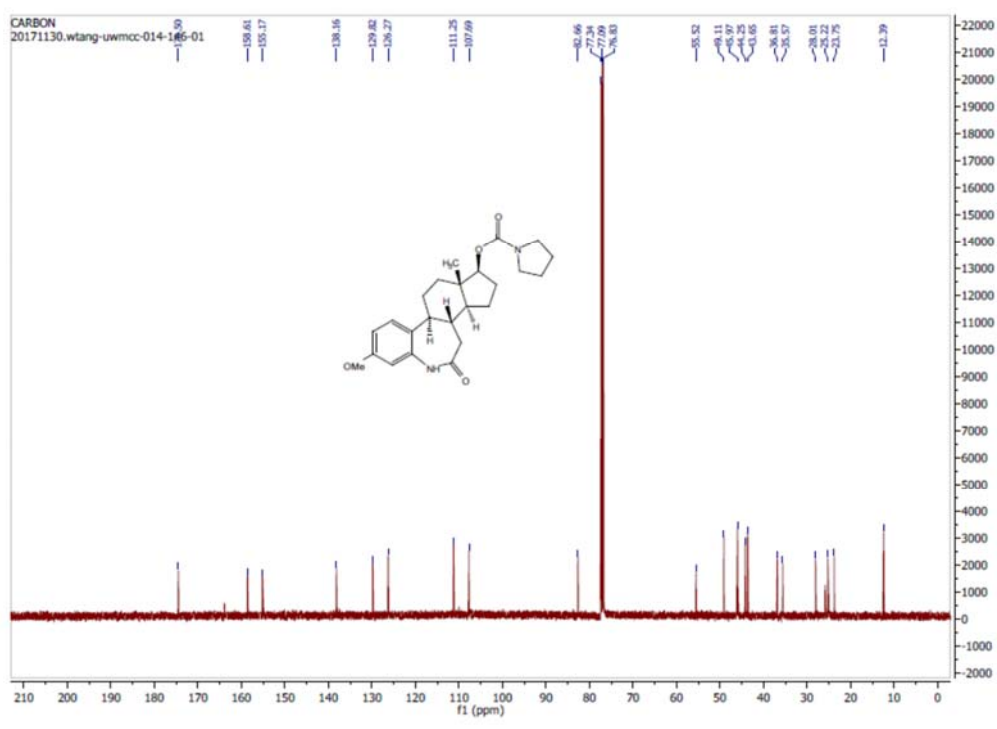

Supplementary Figure 158. <sup>1</sup>H and <sup>13</sup>C spectra of 43c.

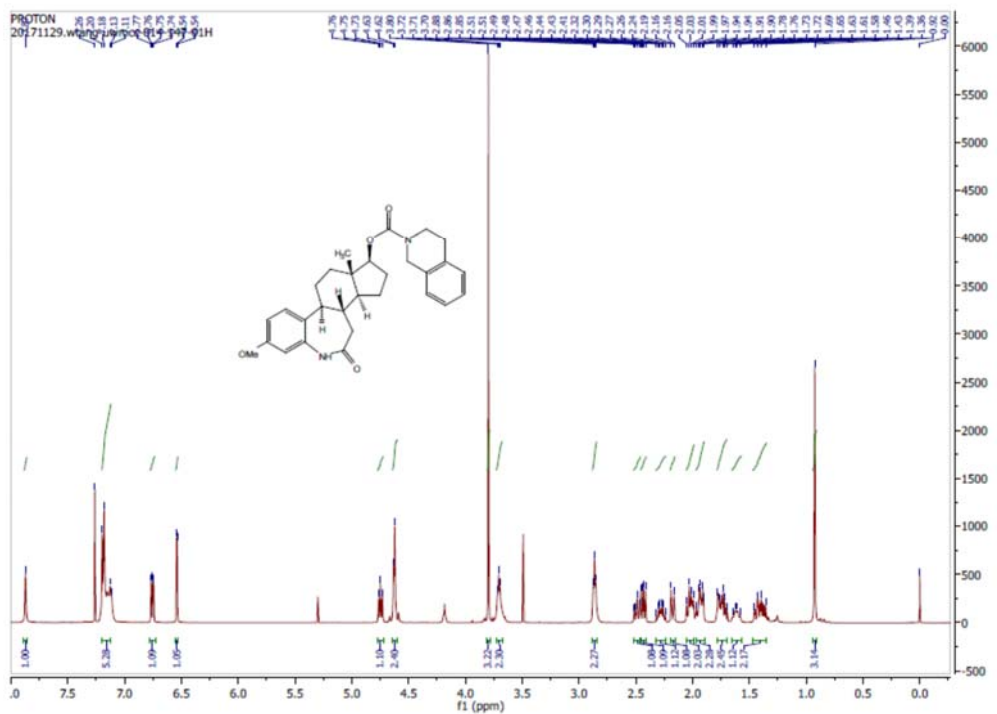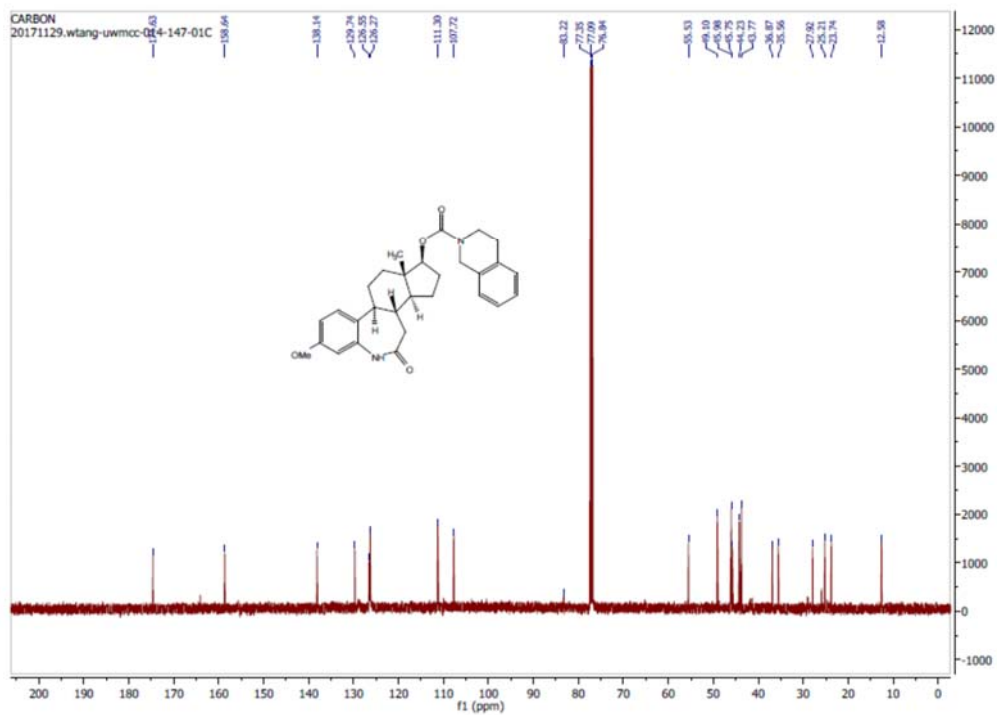

Supplementary Figure 159. <sup>1</sup>H and <sup>13</sup>C spectra of 43d.

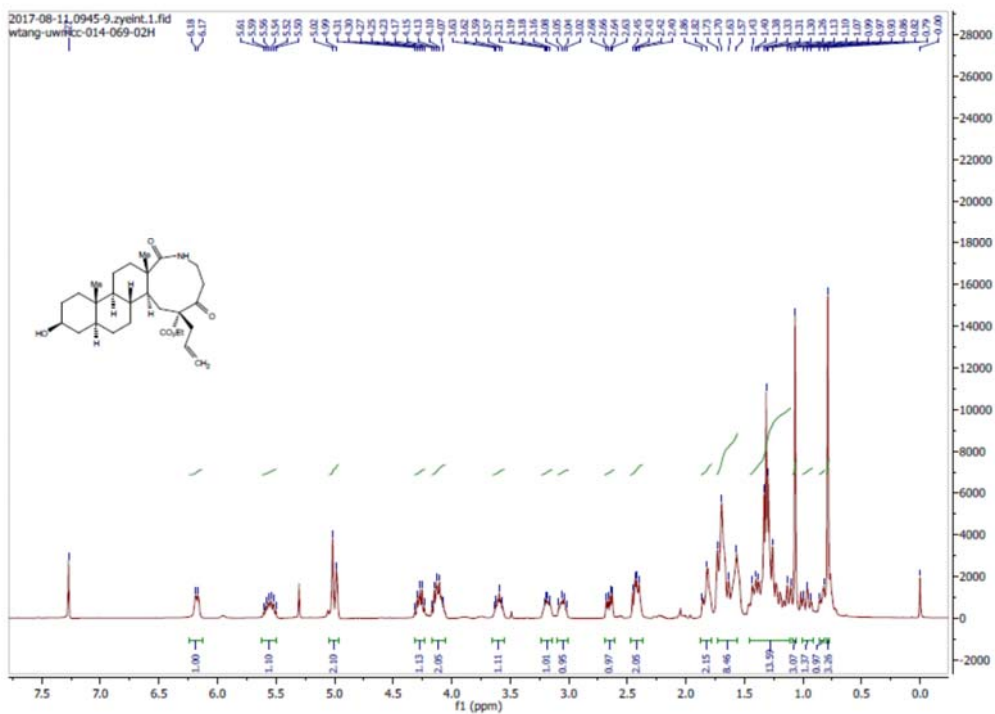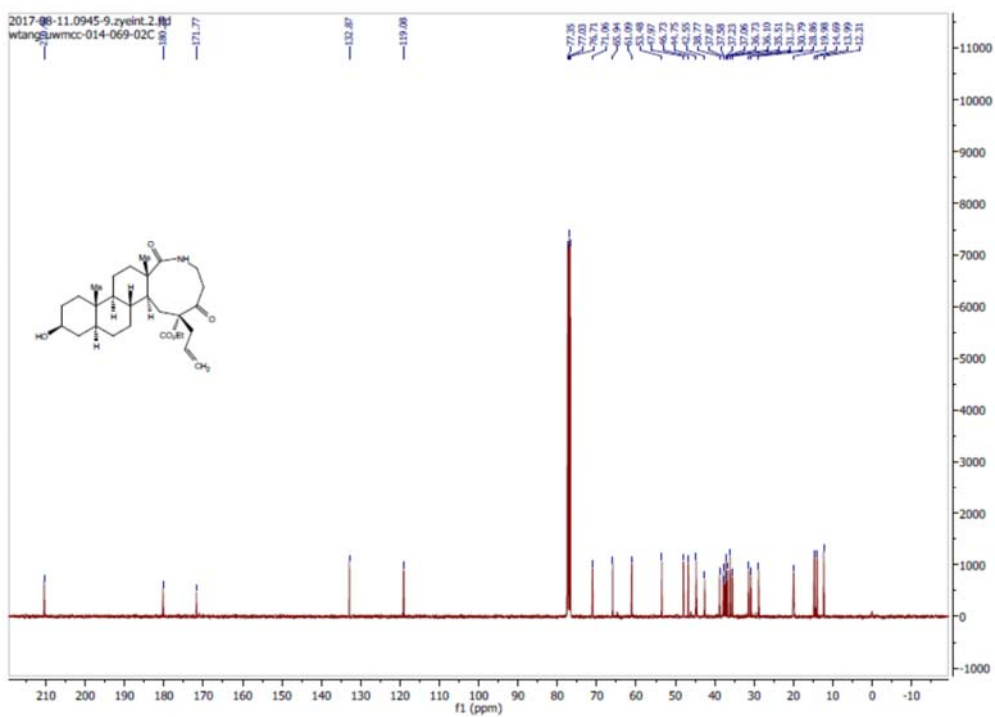

Supplementary Figure 160.  $^1\text{H}$  and  $^{13}\text{C}$  spectra of S14a.

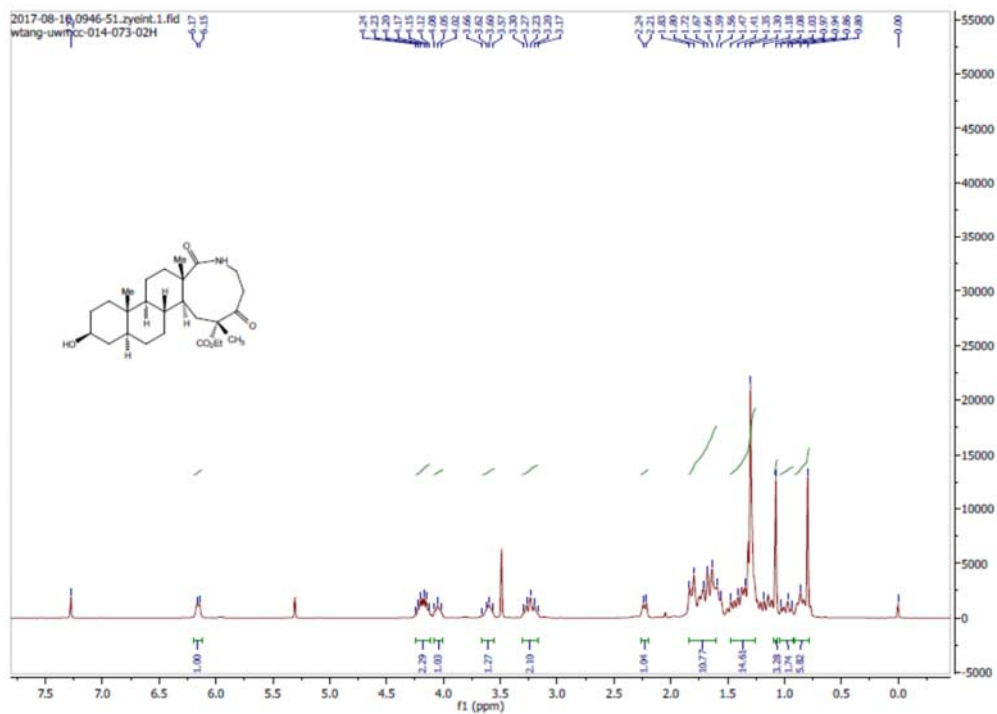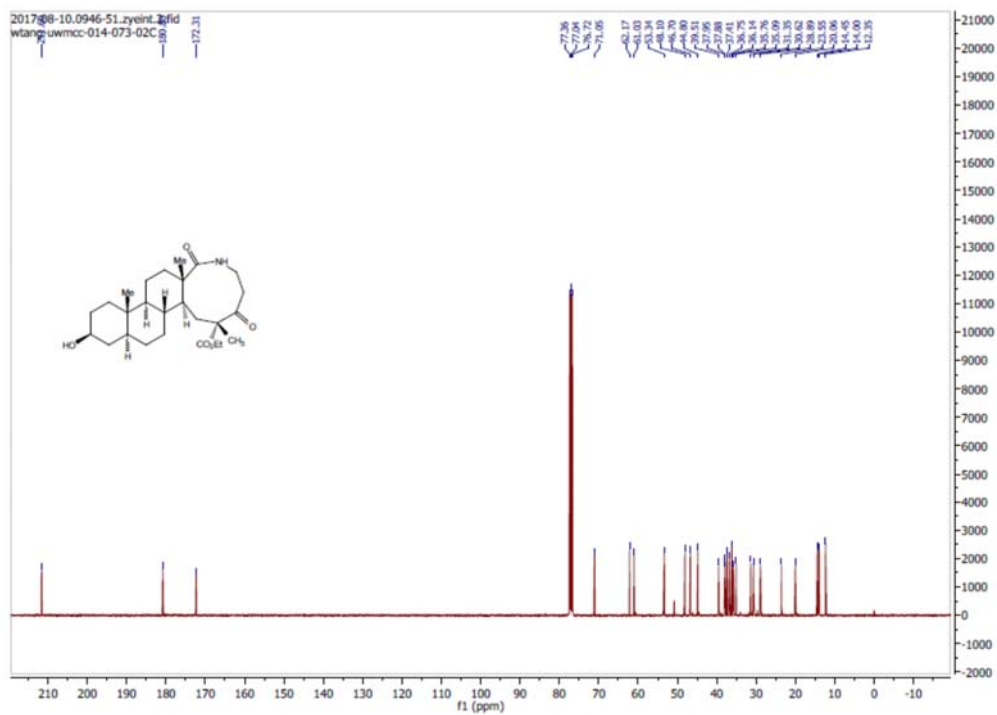

Supplementary Figure 161.  $^1\text{H}$  and  $^{13}\text{C}$  spectra of S14b.



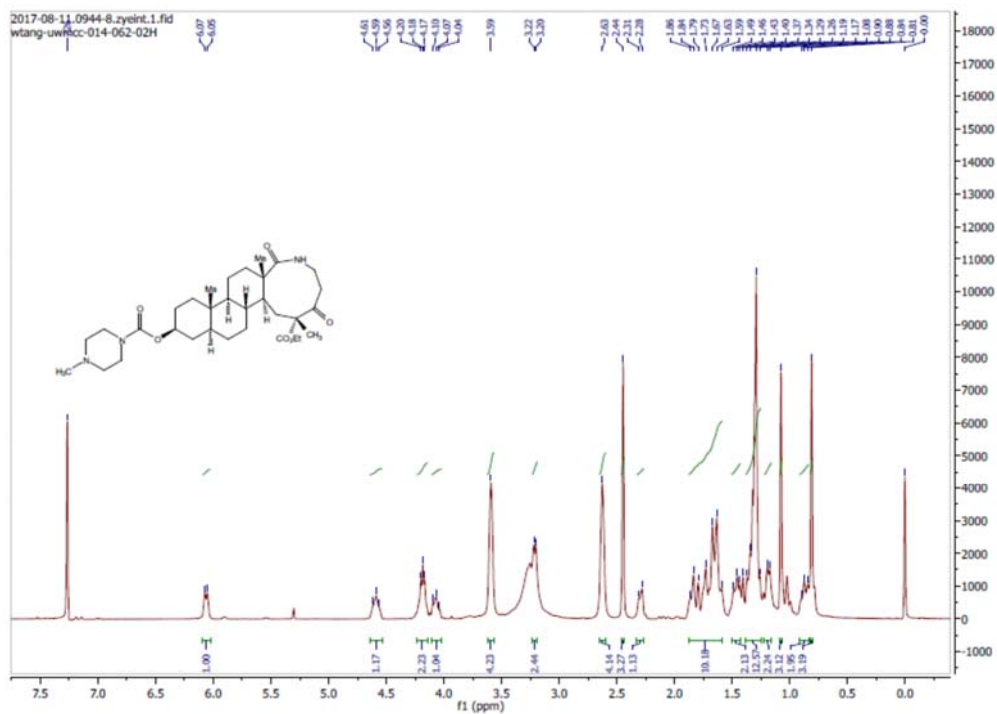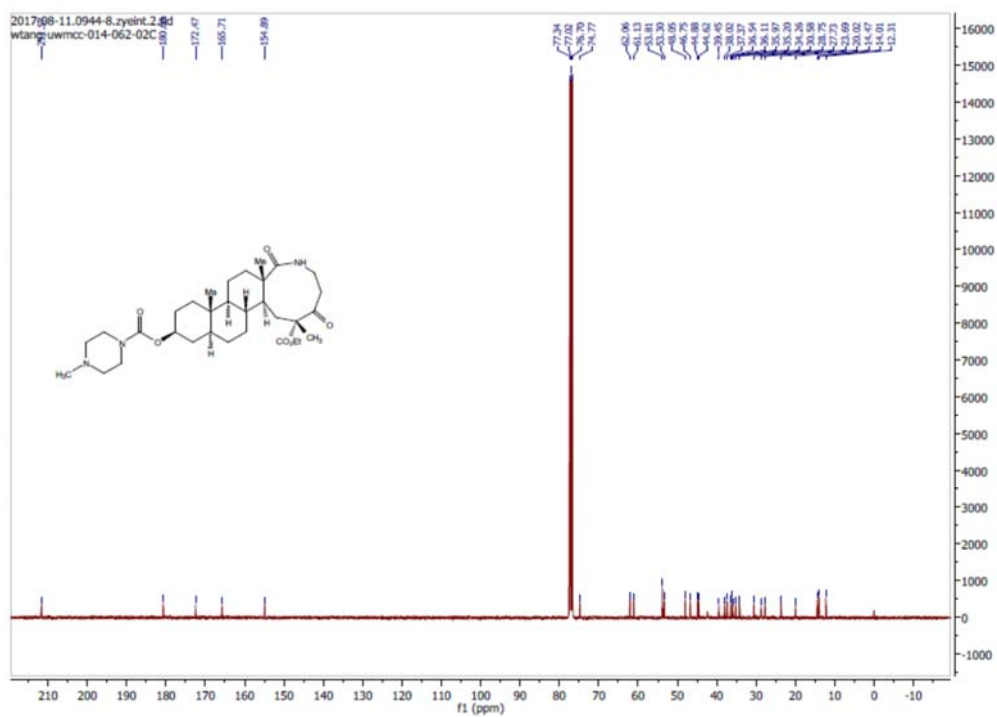

Supplementary Figure 162.  $^1\text{H}$  and  $^{13}\text{C}$  spectra of 45a.

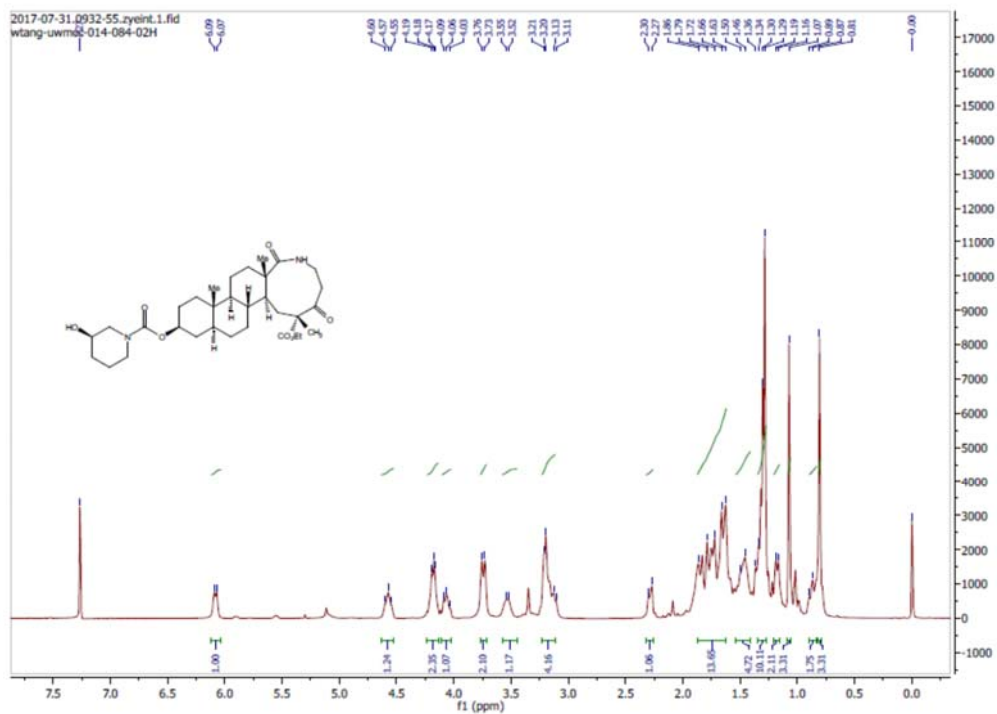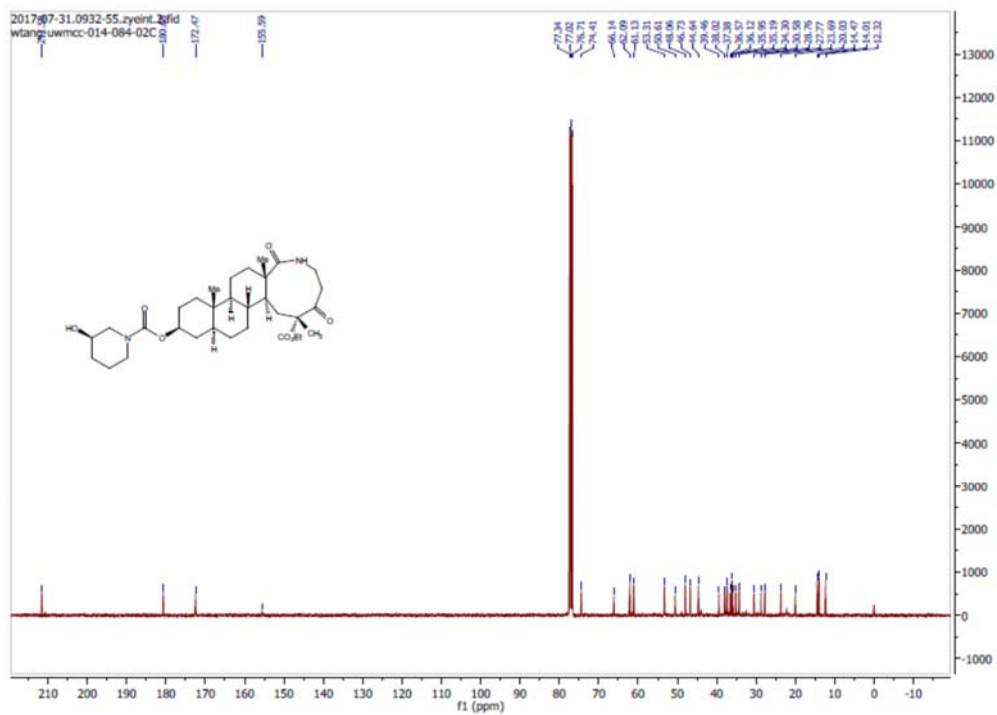

Supplementary Figure 163.  $^1\text{H}$  and  $^{13}\text{C}$  spectra of 45b.

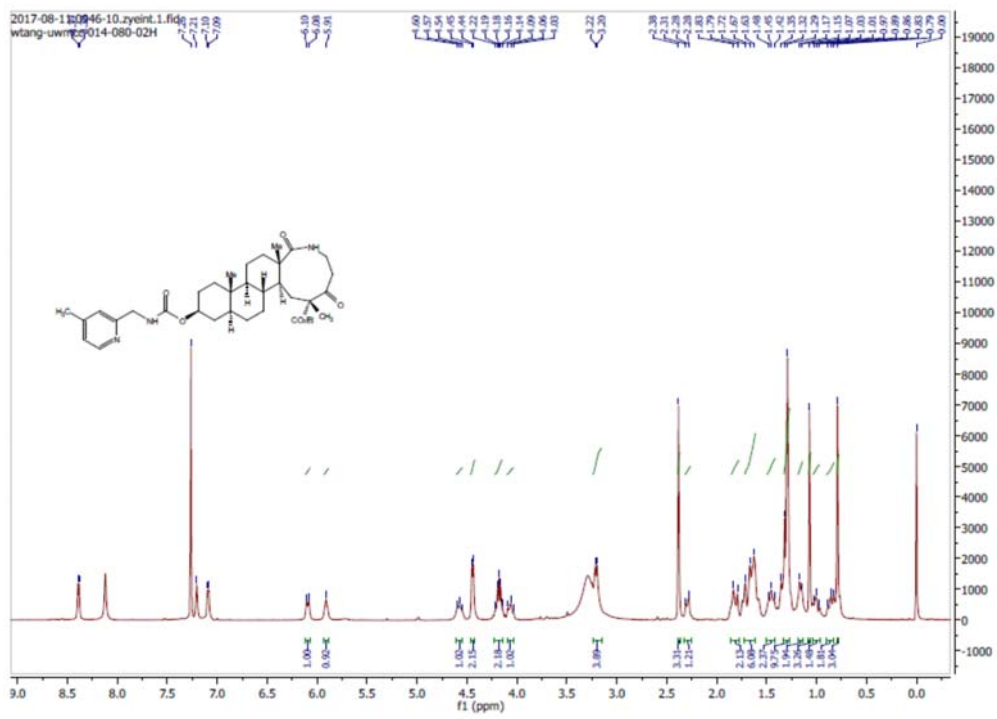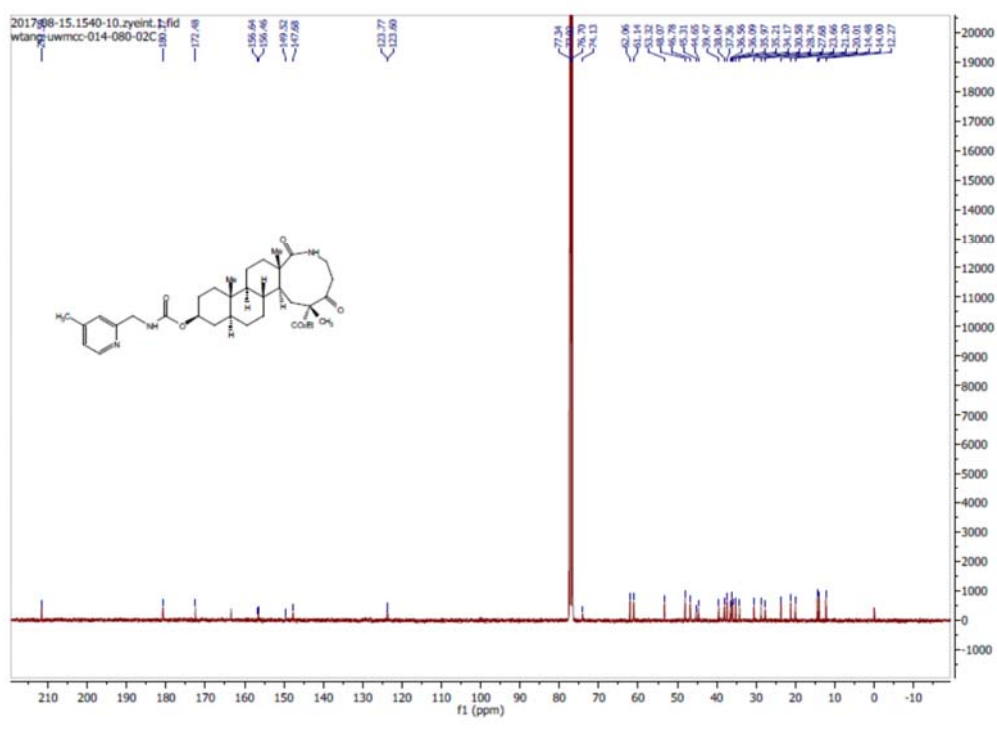

Supplementary Figure 164. <sup>1</sup>H and <sup>13</sup>C spectra of 45c.

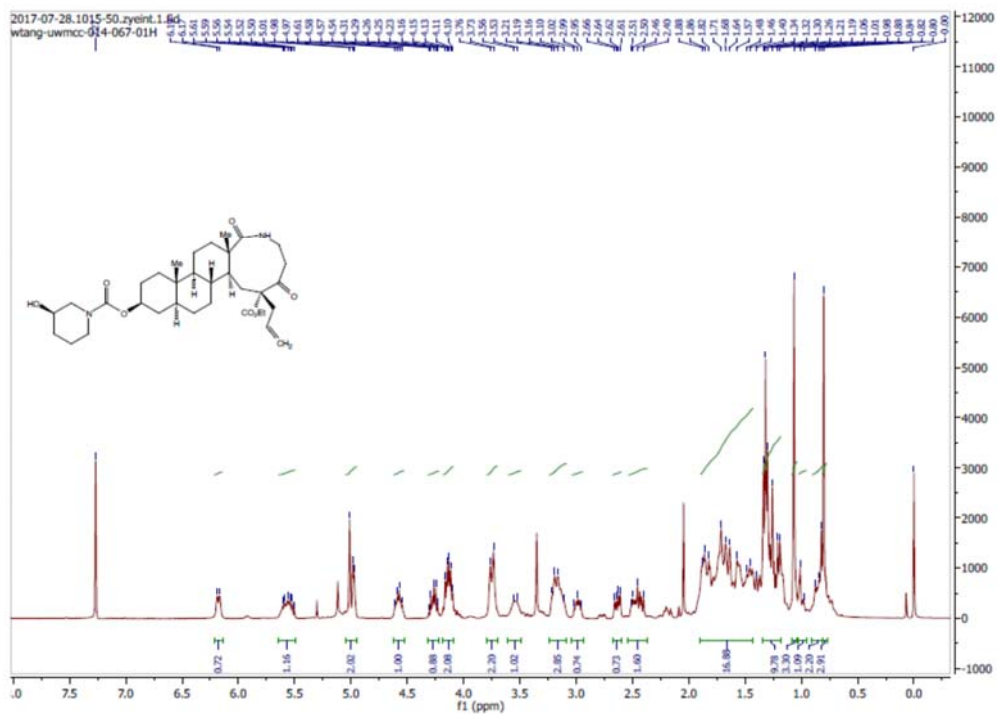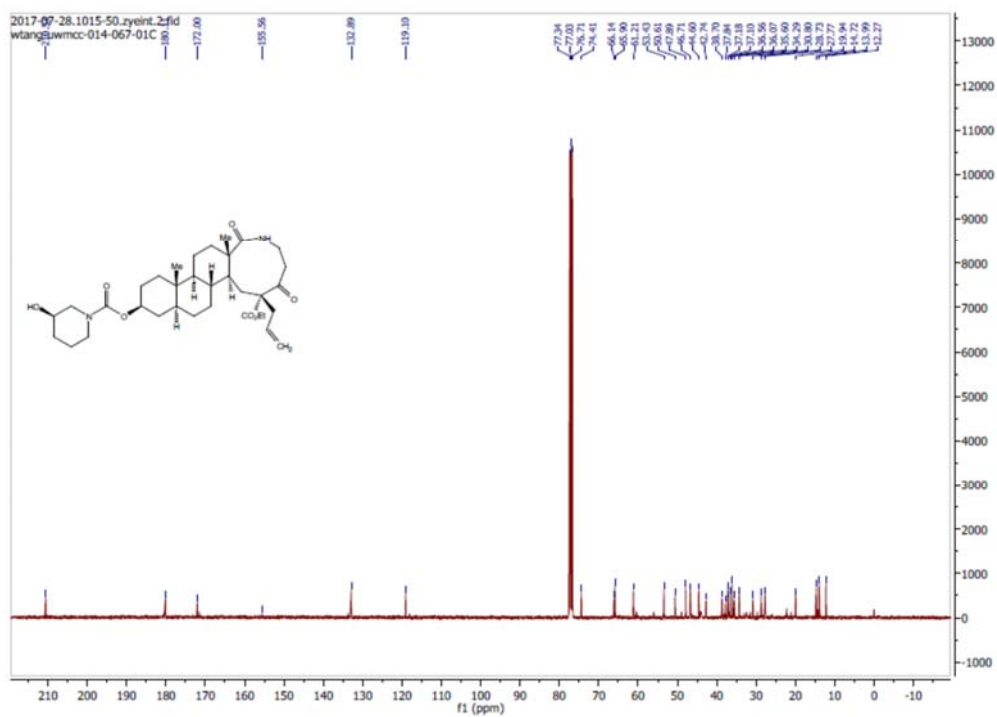

Supplementary Figure 165.  $^1\text{H}$  and  $^{13}\text{C}$  spectra of 45d.

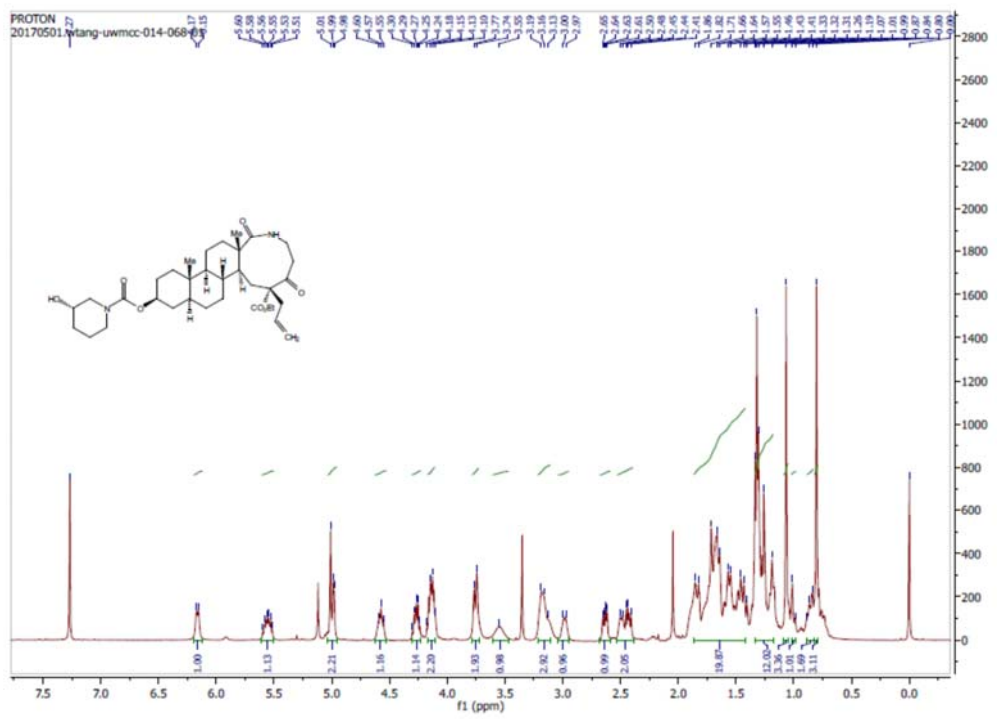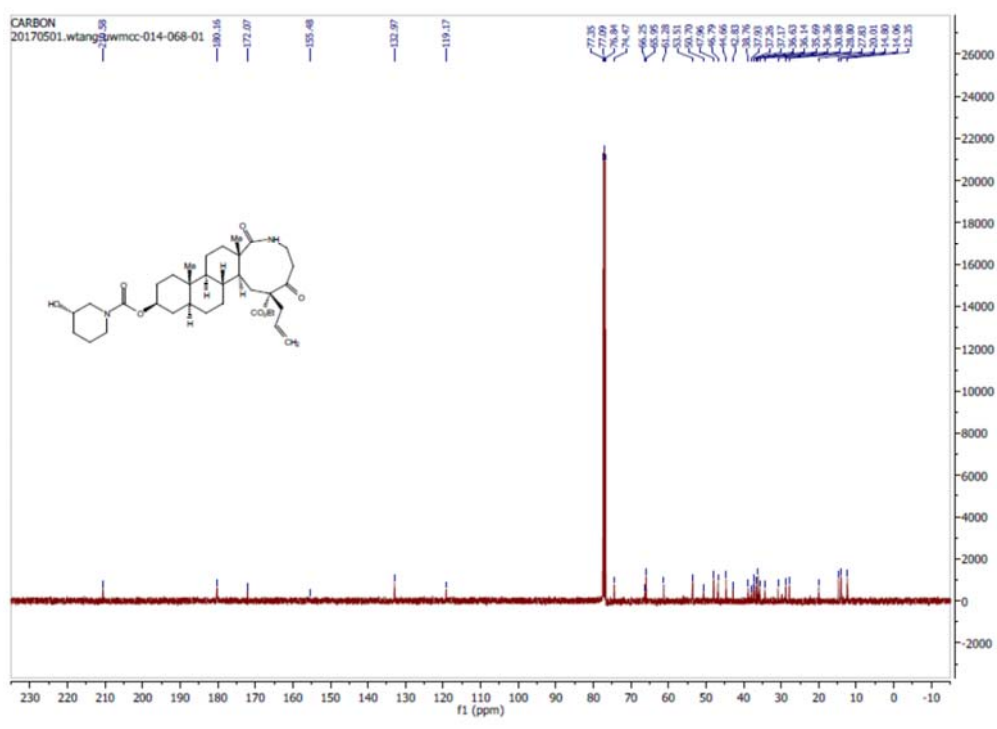

Supplementary Figure 166.  $^1\text{H}$  and  $^{13}\text{C}$  spectra of 45e.

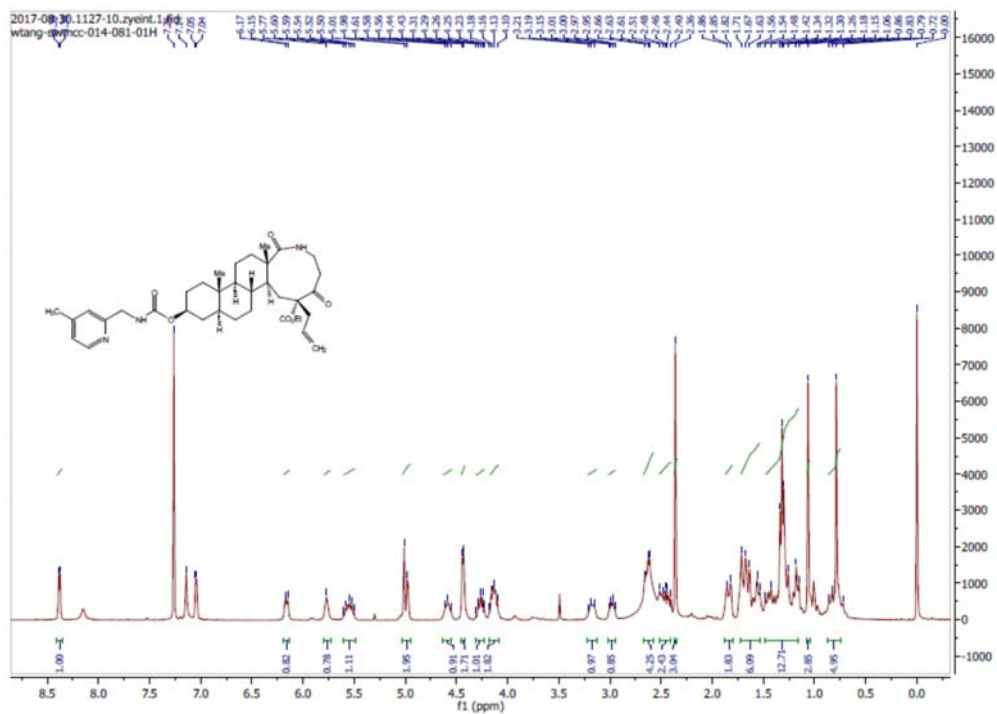

Supplementary Figure 167.  $^1\text{H}$  and spectra of 45f.

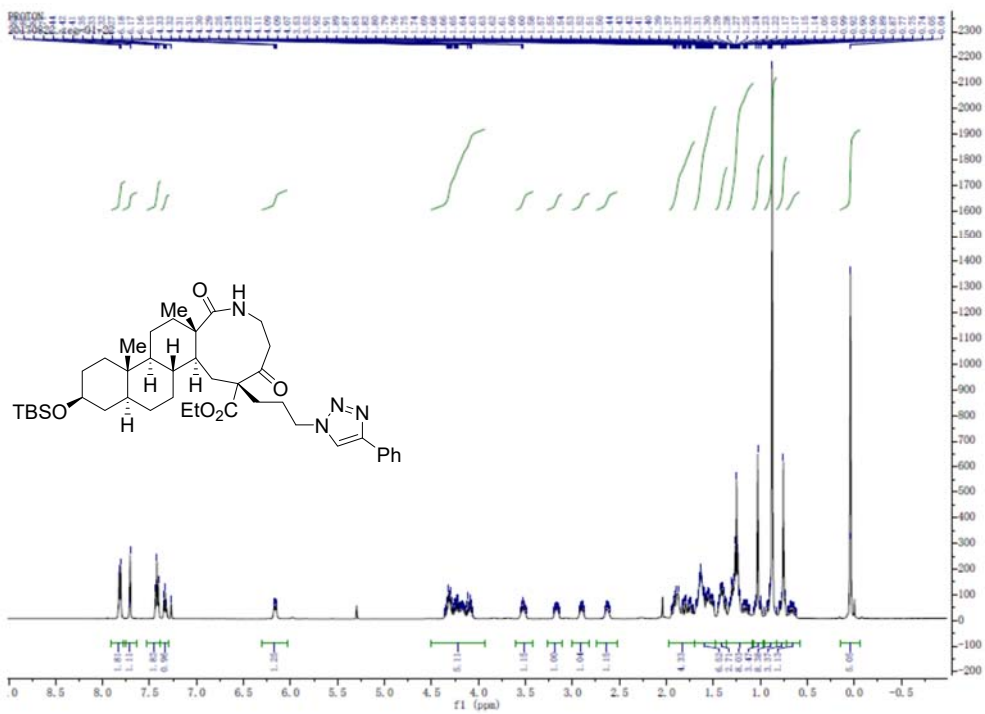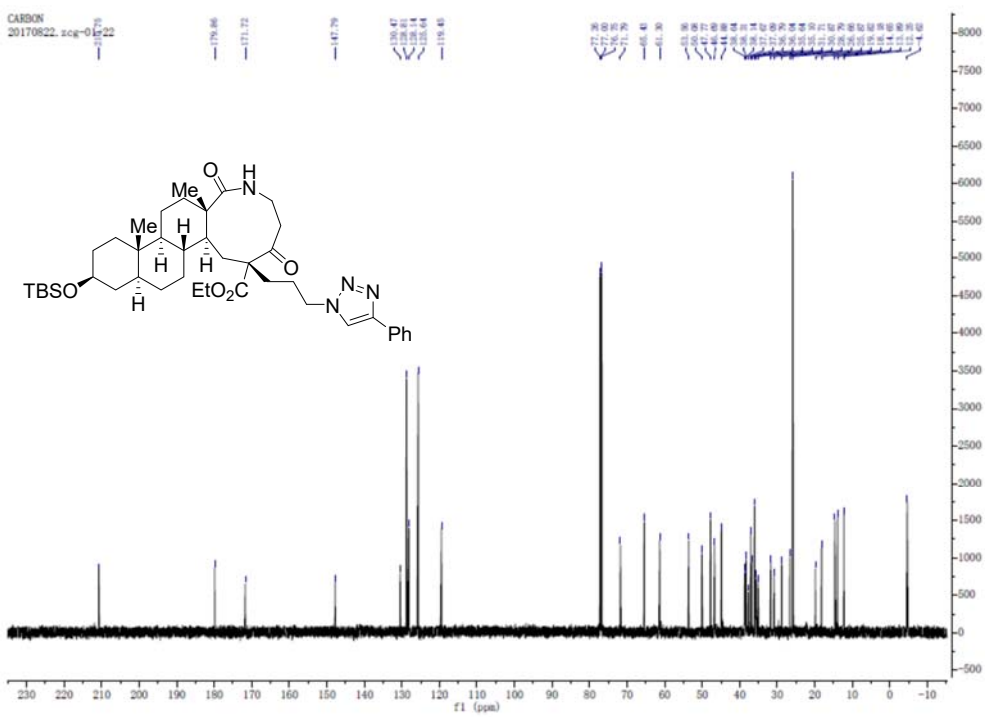

Supplementary Figure 168. <sup>1</sup>H and <sup>13</sup>C spectra of S46a.

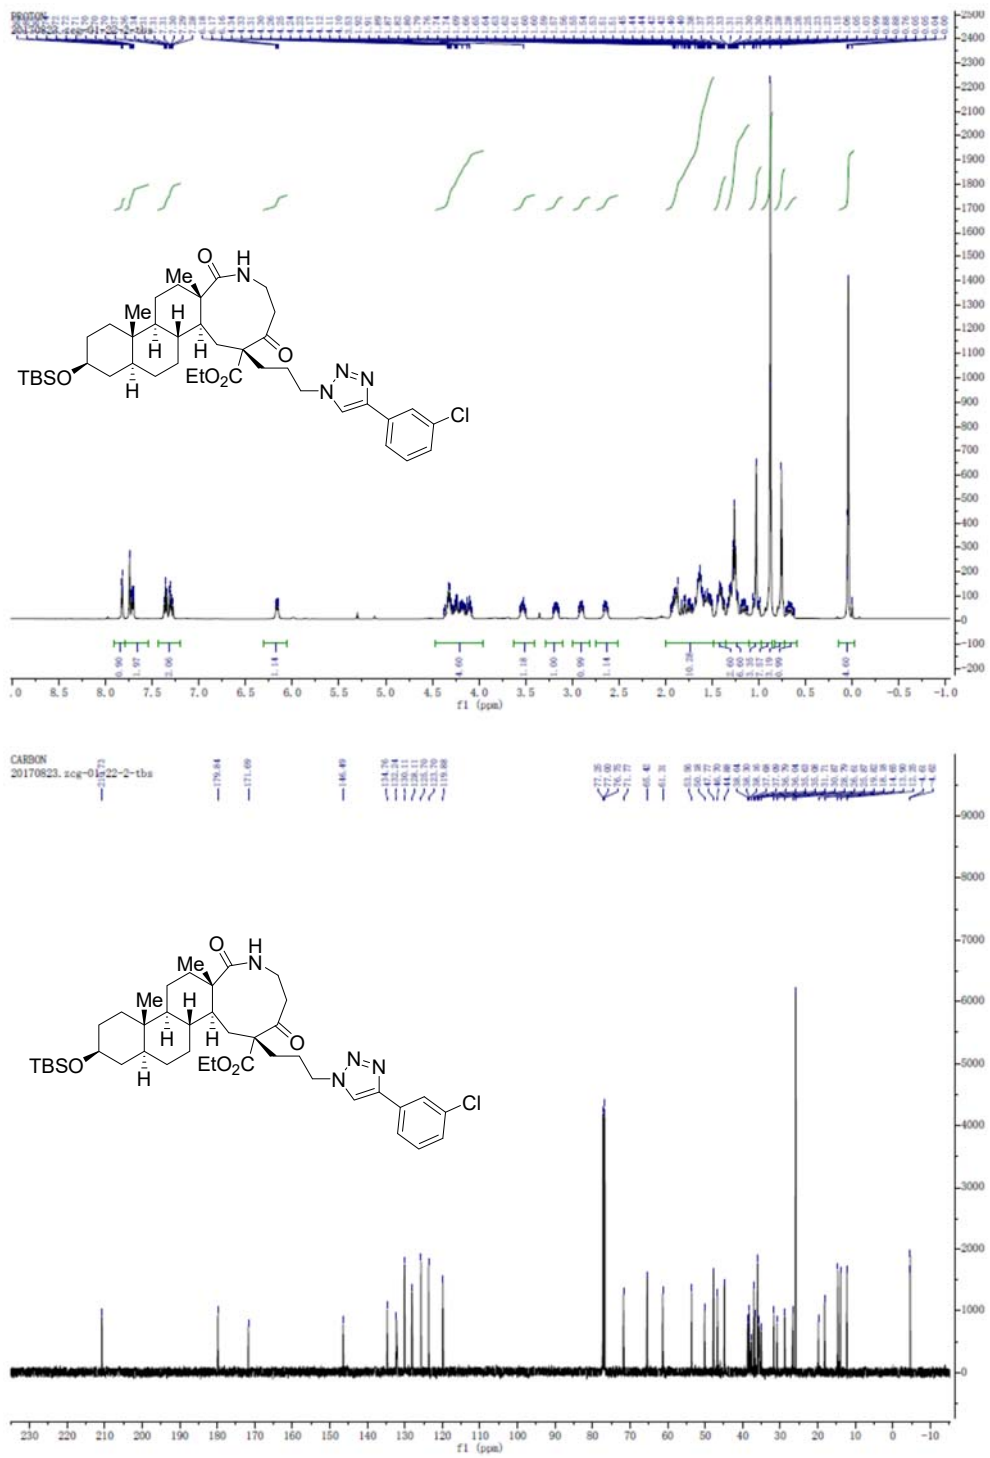

Supplementary Figure 169. <sup>1</sup>H and <sup>13</sup>C spectra of S46b.



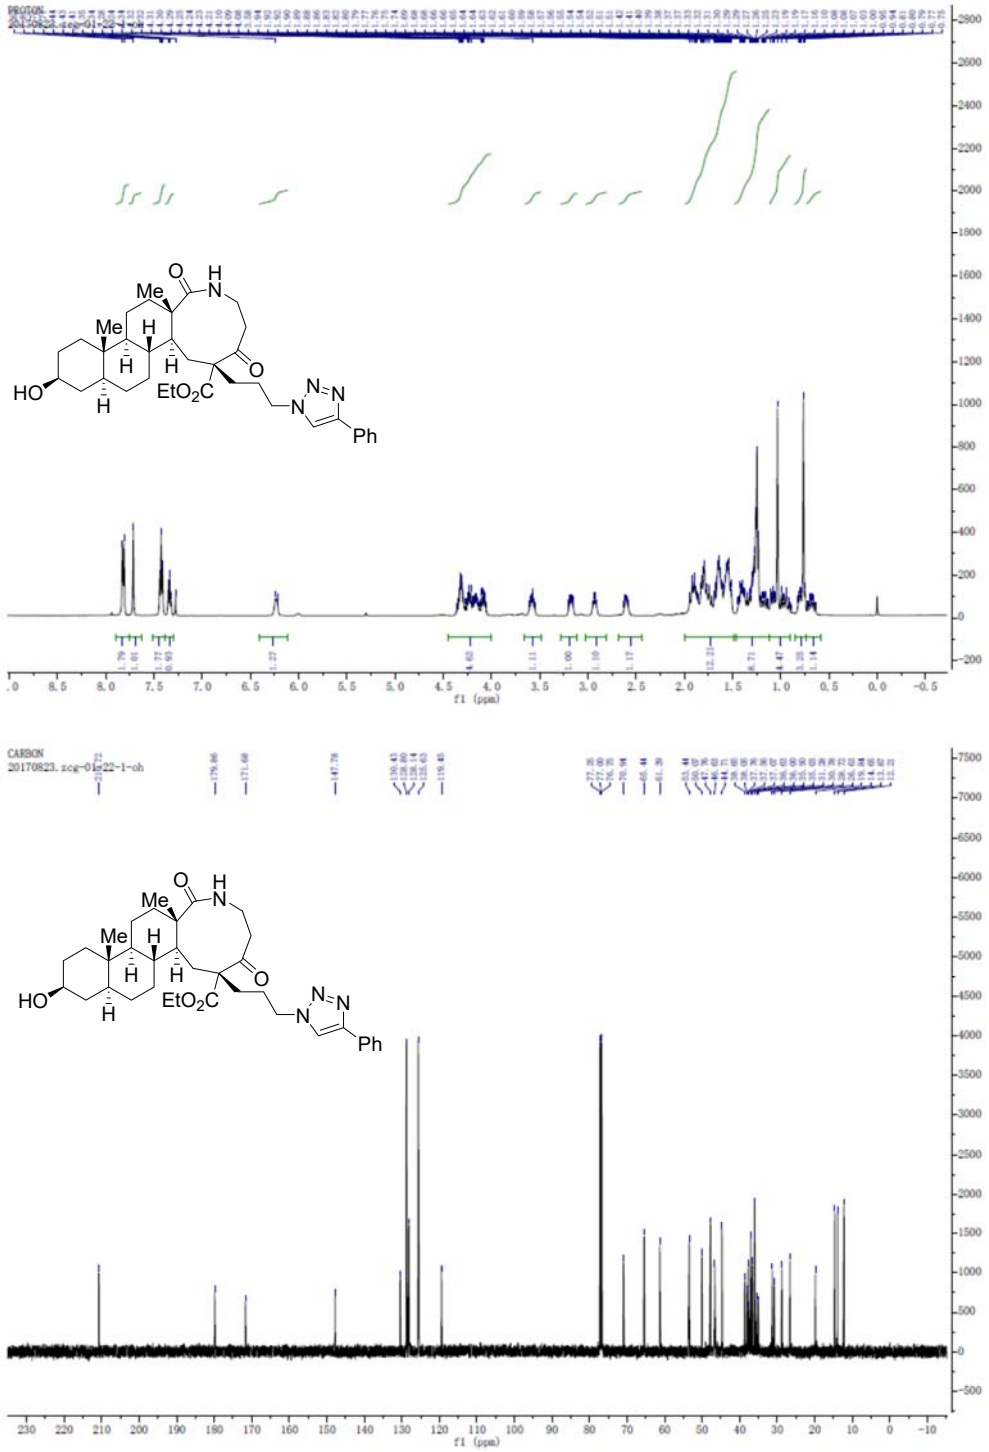

Supplementary Figure 170. <sup>1</sup>H and <sup>13</sup>C spectra of 46a.

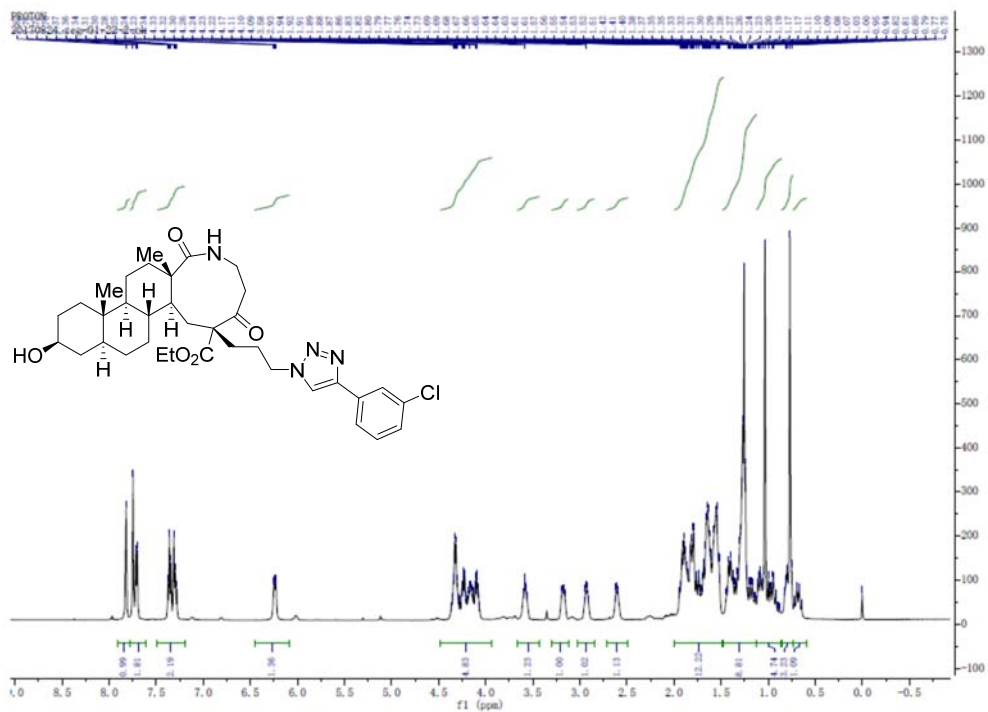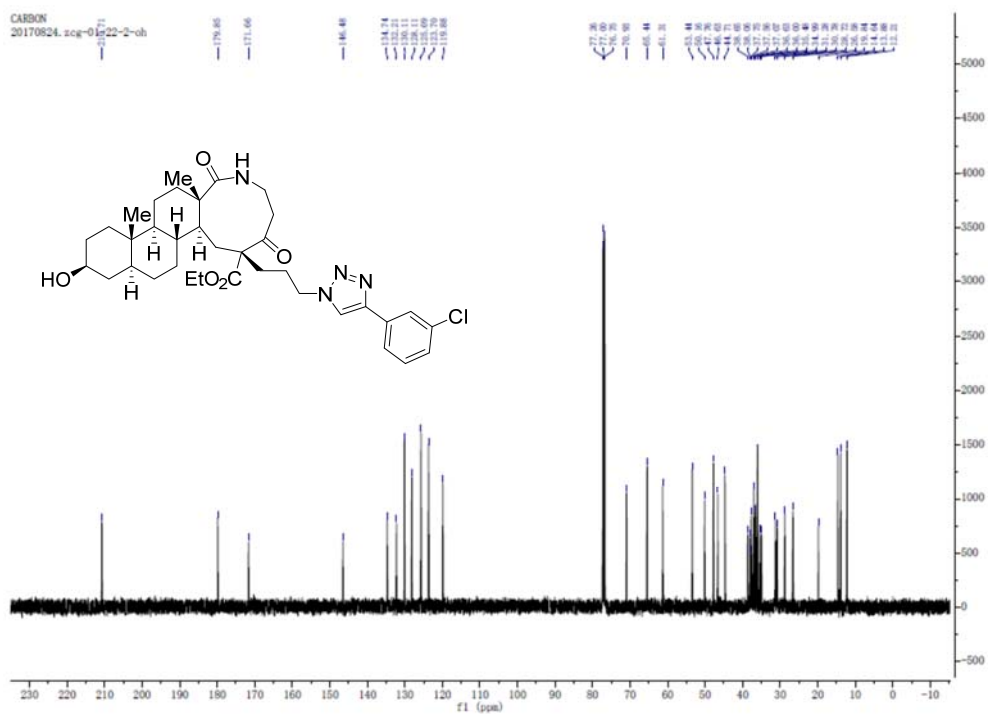

Supplementary Figure 171. <sup>1</sup>H and <sup>13</sup>C spectra of 46b.



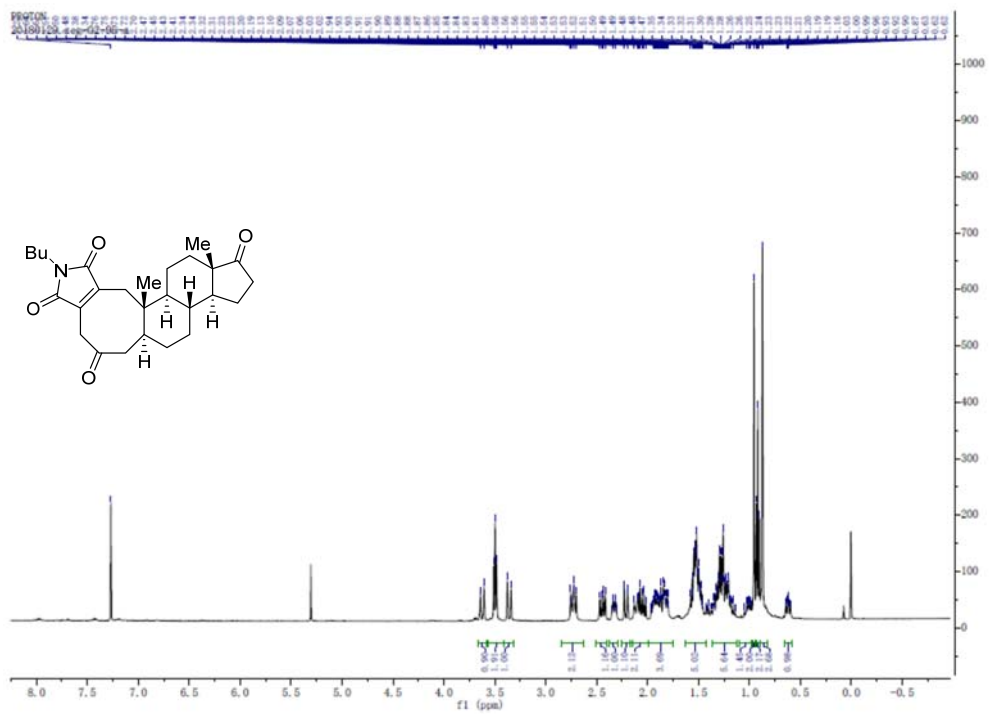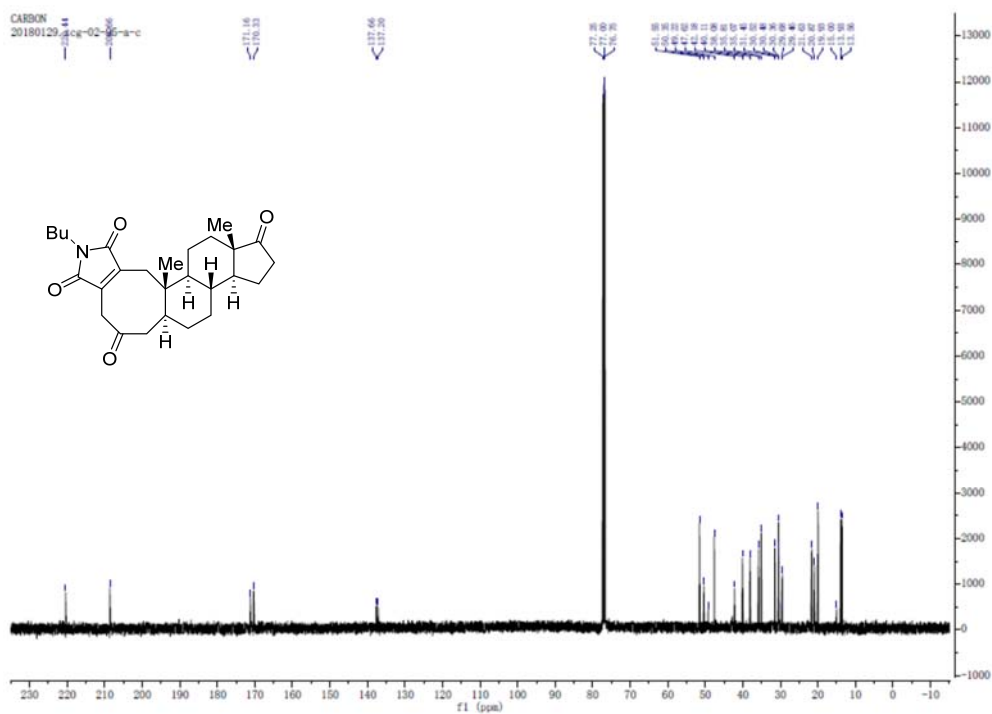

Supplementary Figure 173.  $^1\text{H}$  and  $^{13}\text{C}$  spectra of 48a.

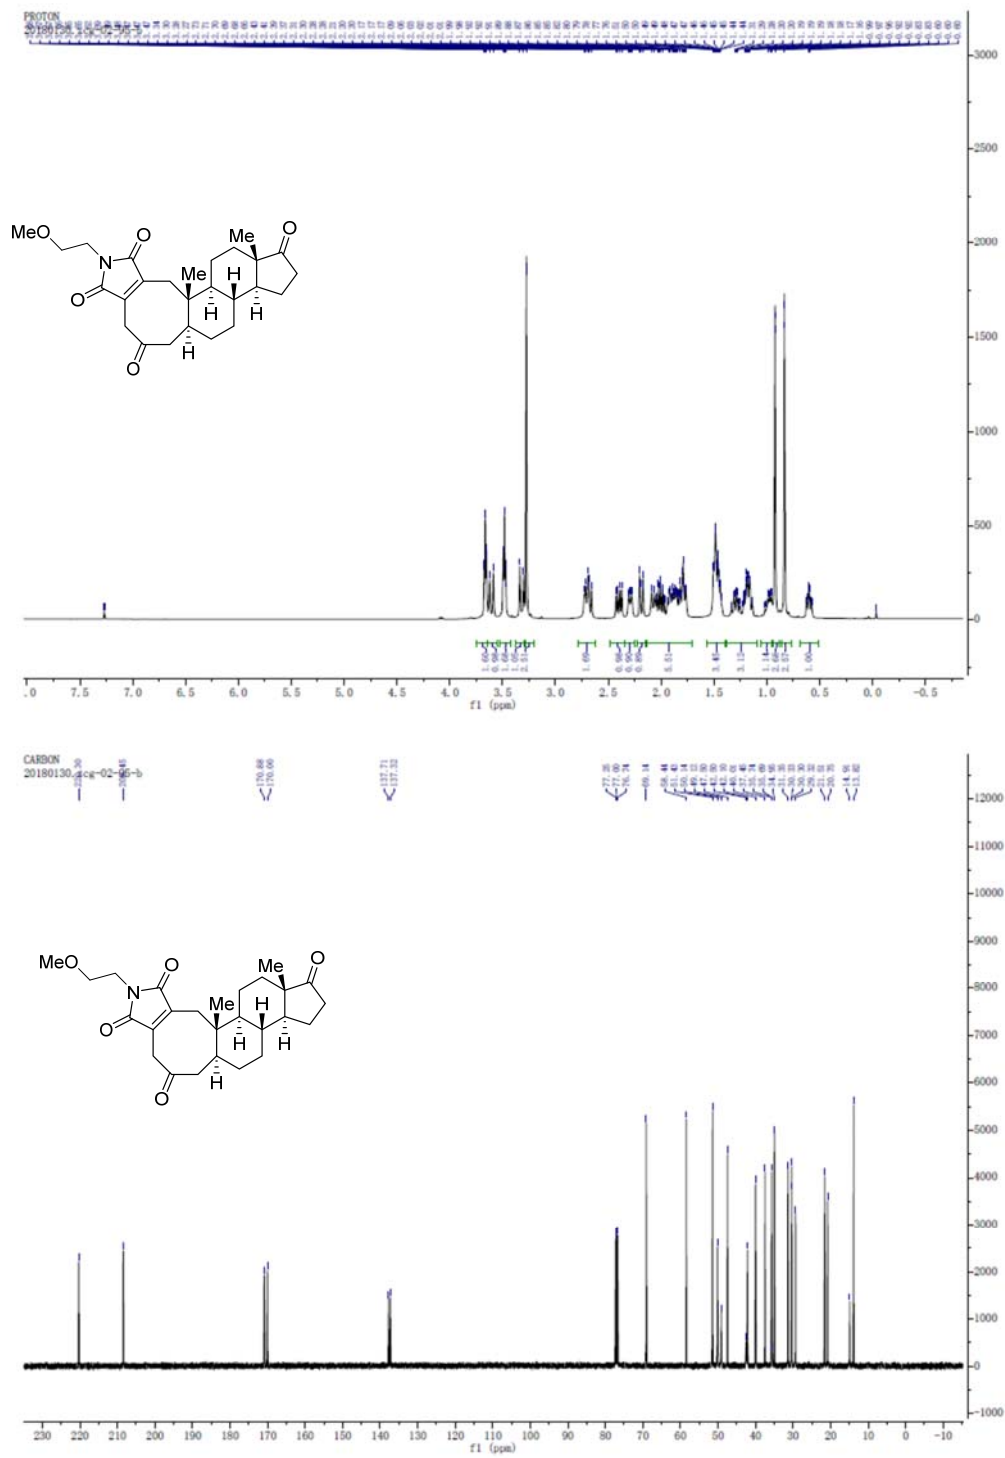

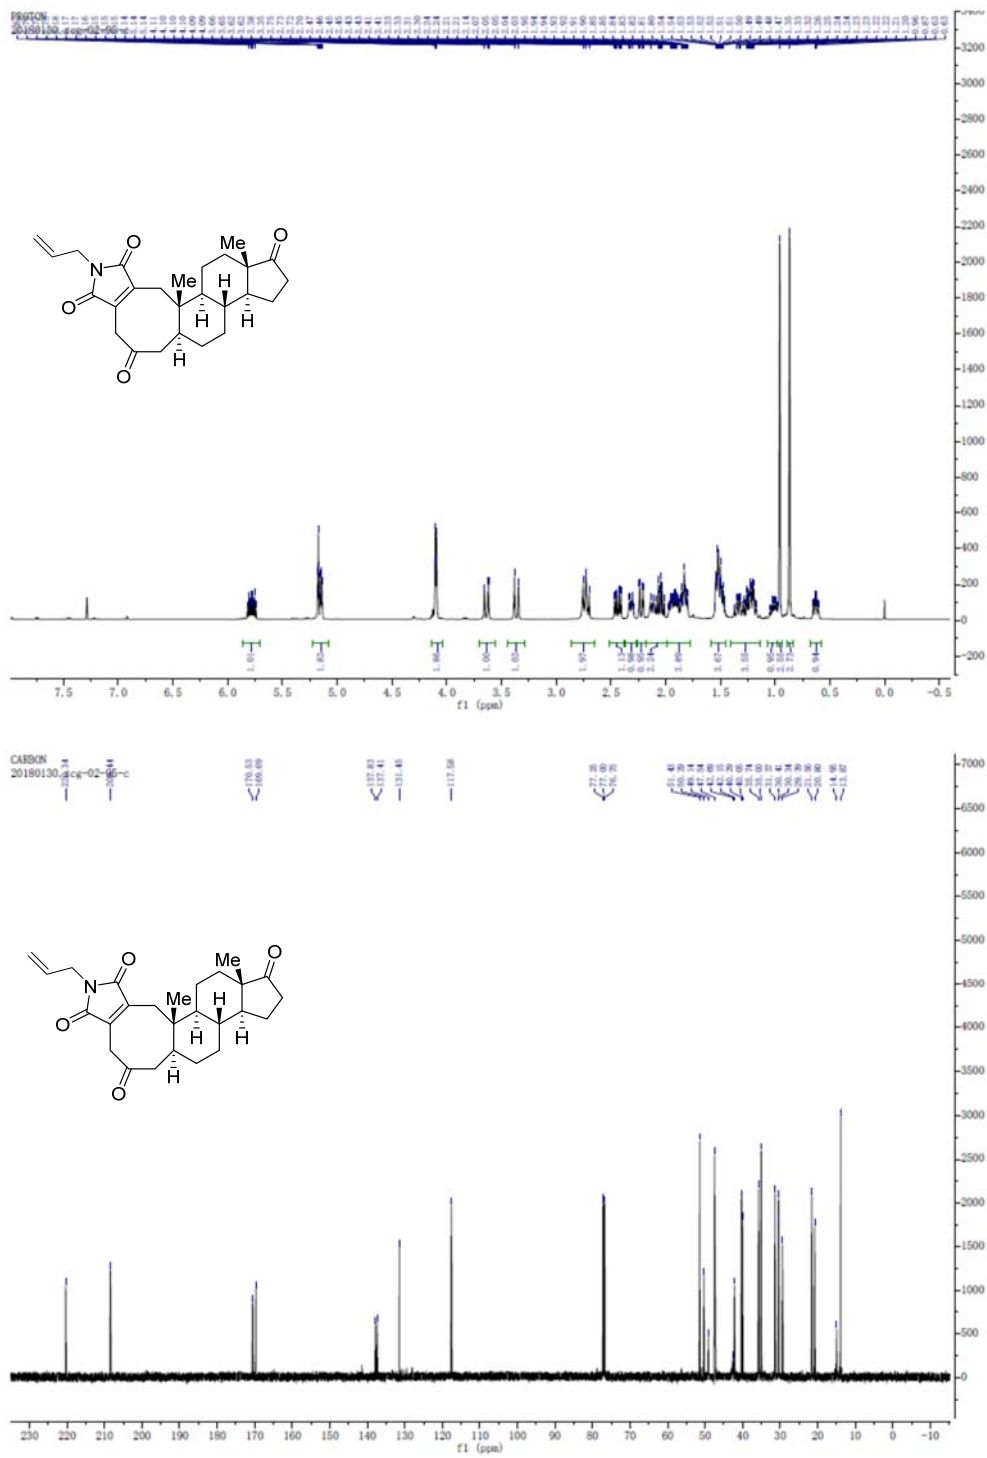

Supplementary Figure 175. <sup>1</sup>H and <sup>13</sup>C spectra of 48c.

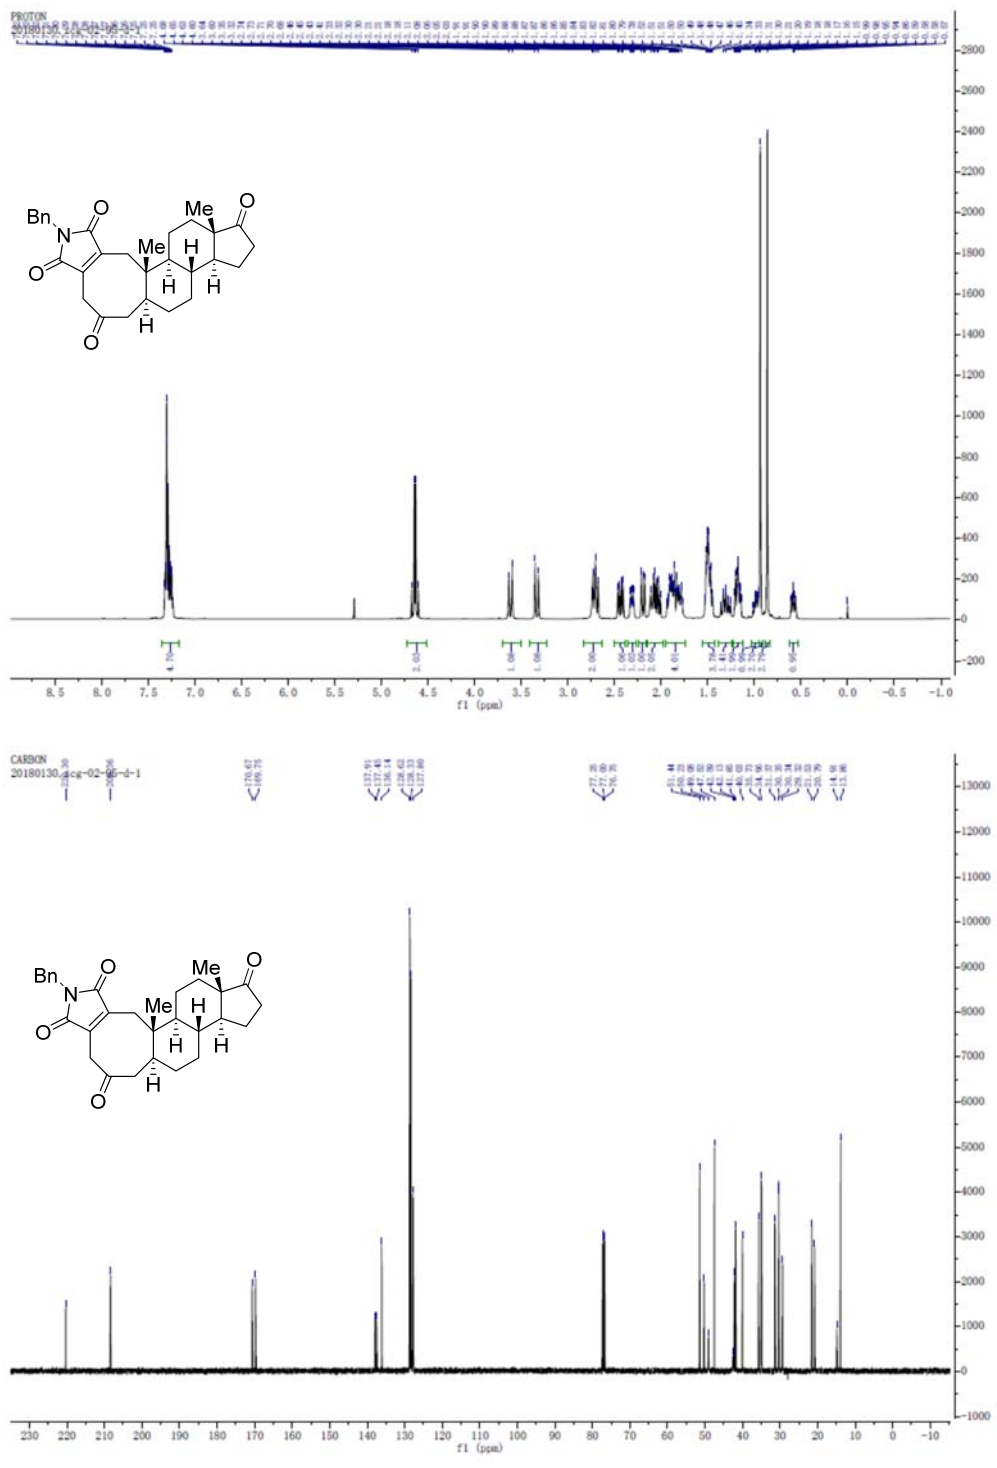

Supplementary Figure 176.  $^1\text{H}$  and  $^{13}\text{C}$  spectra of **48d**.

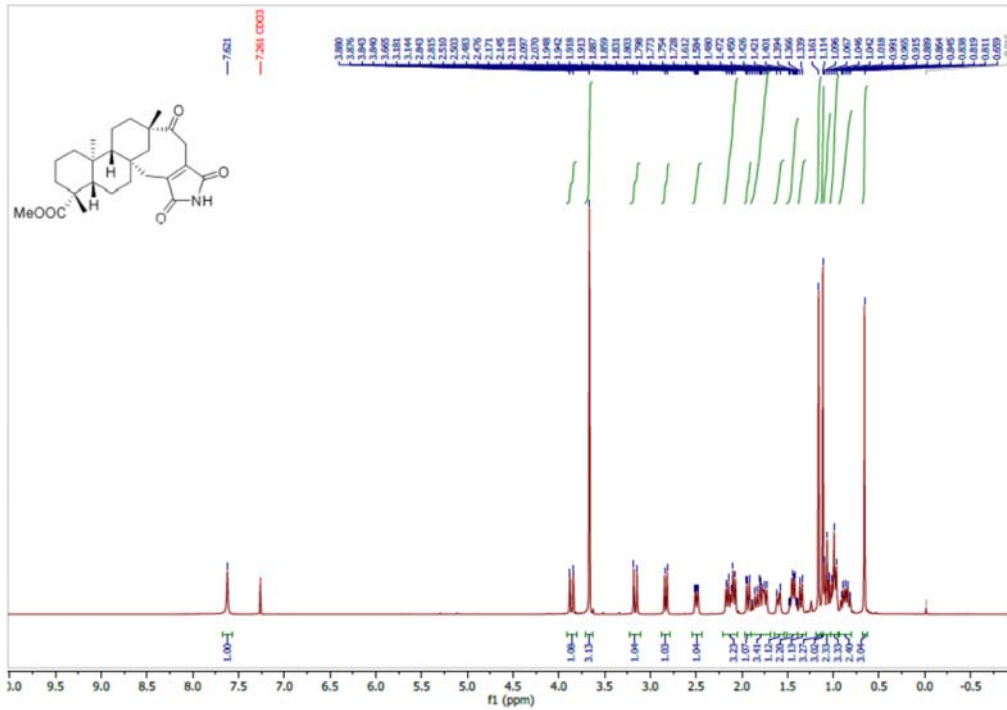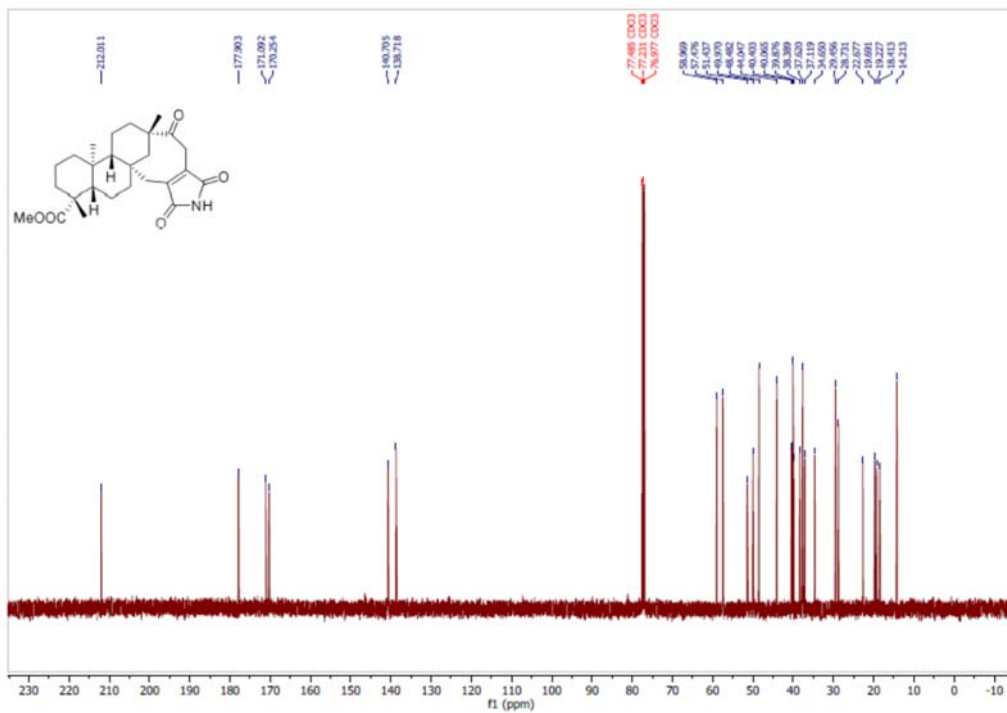

Supplementary Figure 177.  $^1\text{H}$  and  $^{13}\text{C}$  spectra of 47aa.



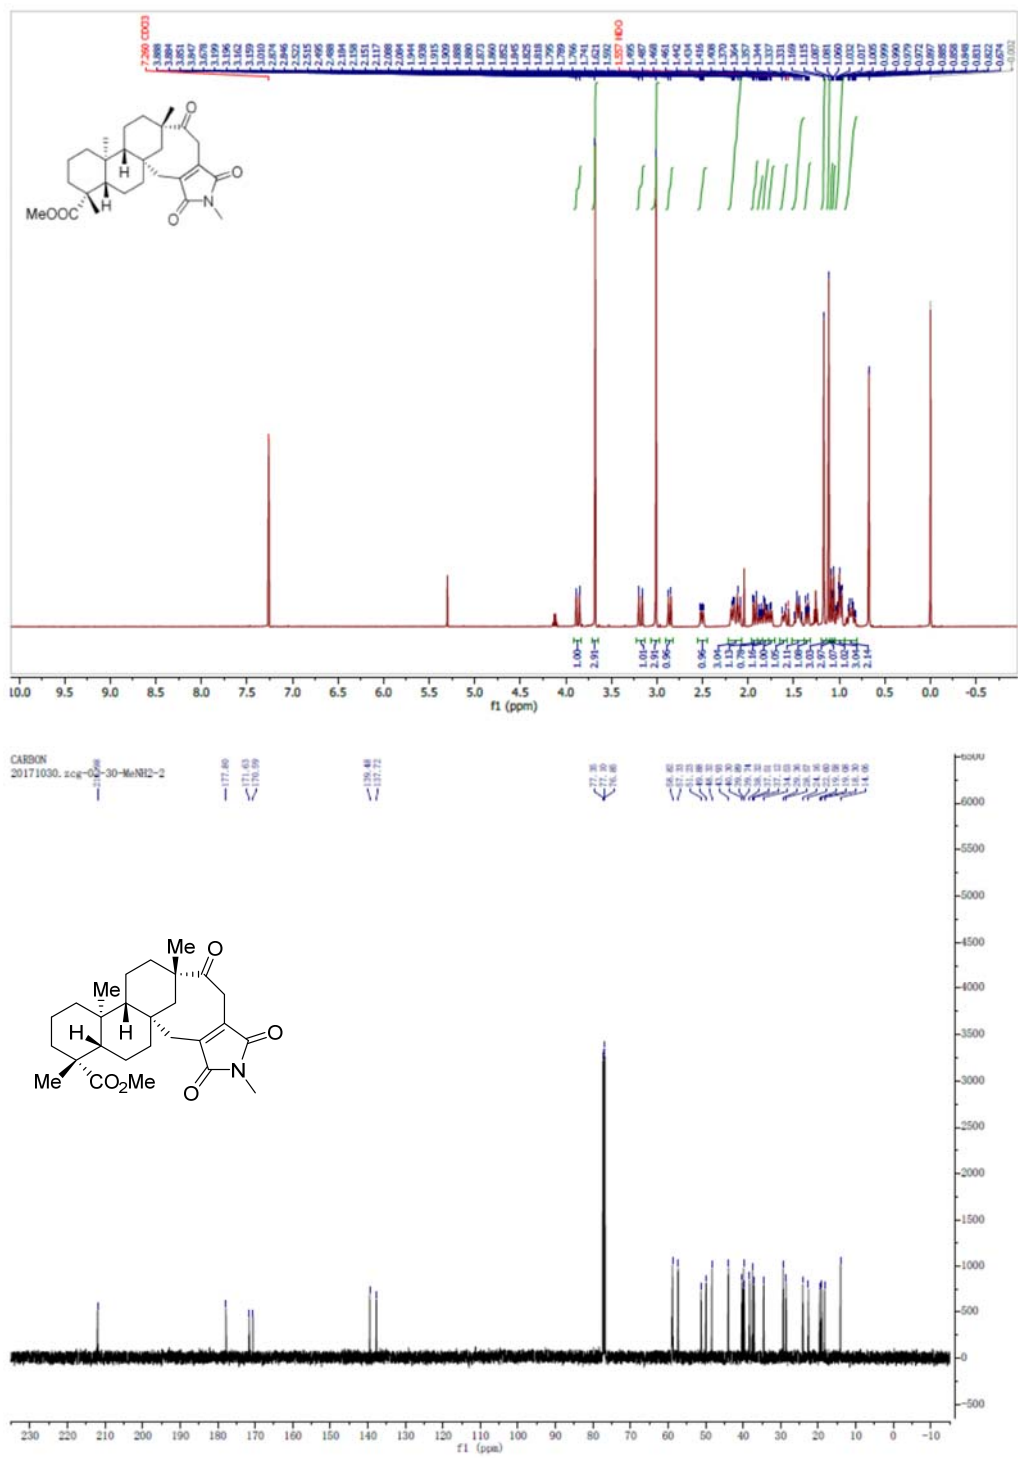

Supplementary Figure 178. <sup>1</sup>H and <sup>13</sup>C spectra of 47ab.



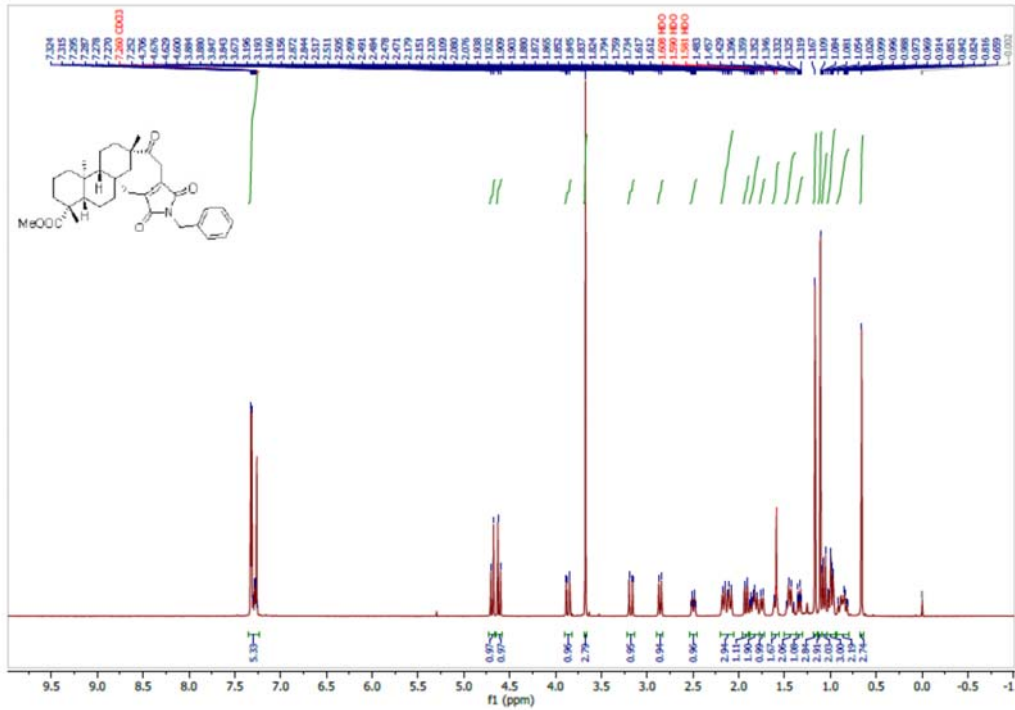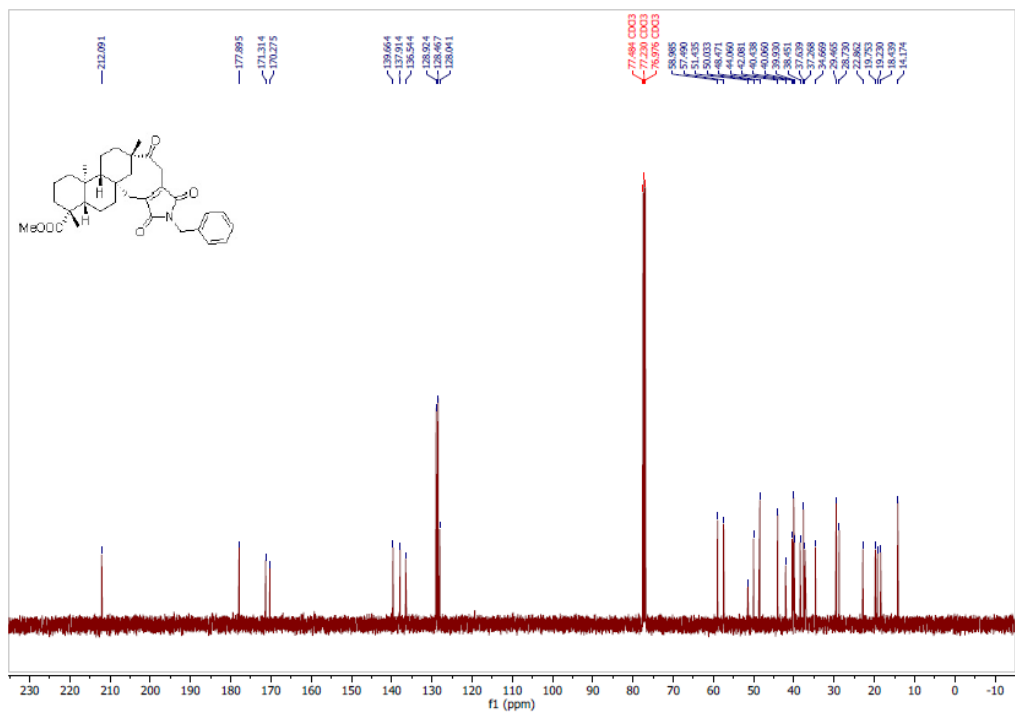

Supplementary Figure 180. <sup>1</sup>H and <sup>13</sup>C spectra of 47ad.

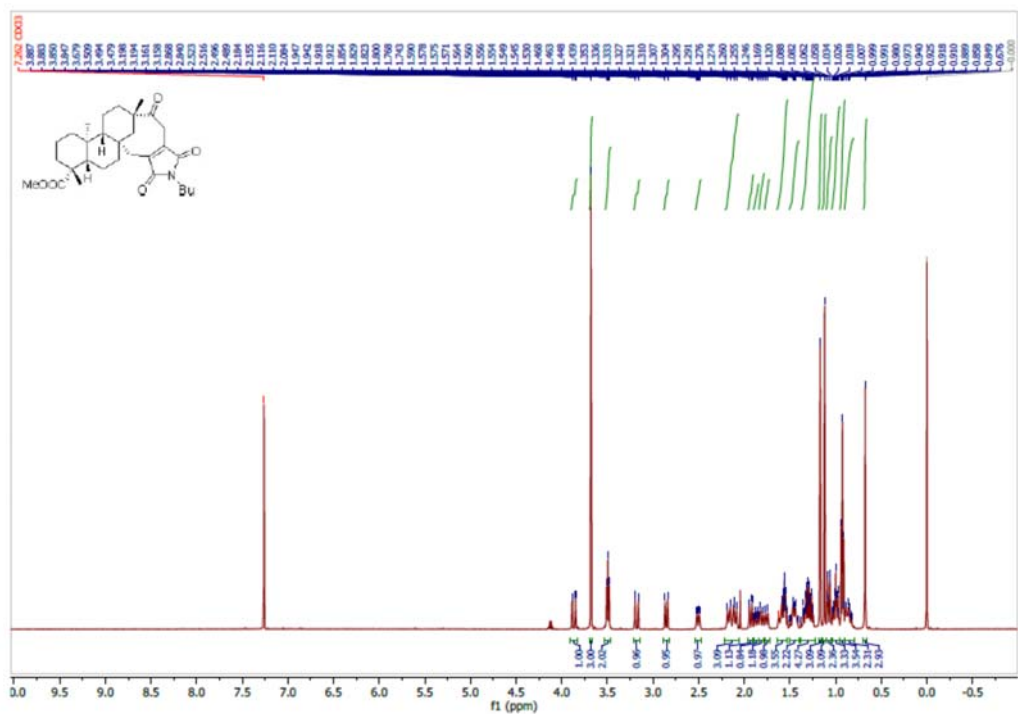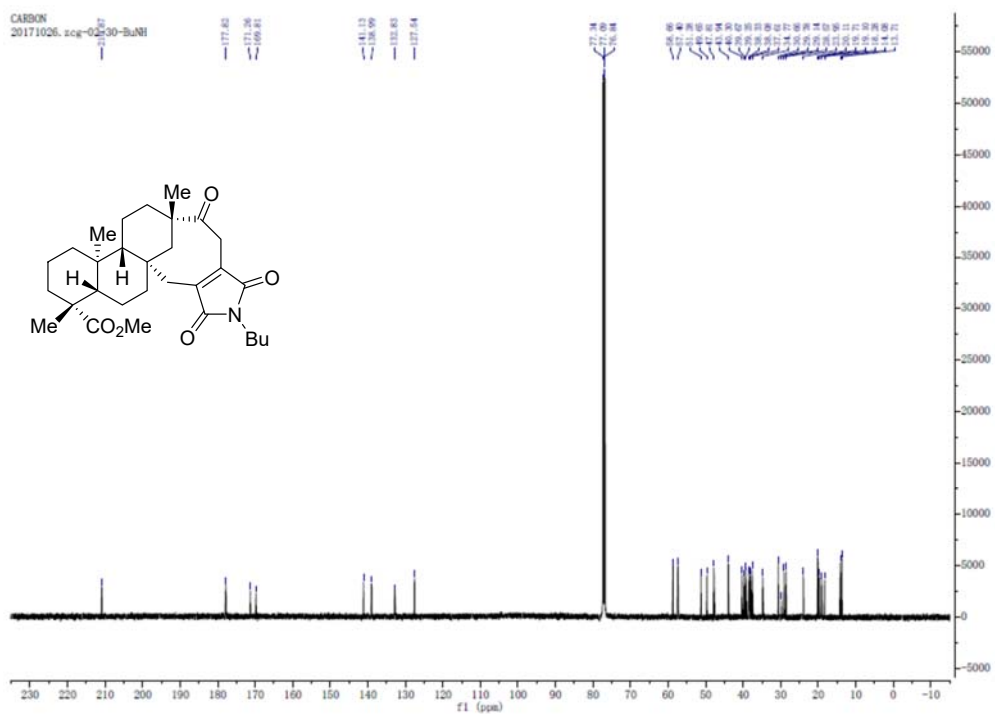

Supplementary Figure 181. <sup>1</sup>H and <sup>13</sup>C spectra of 47ae.

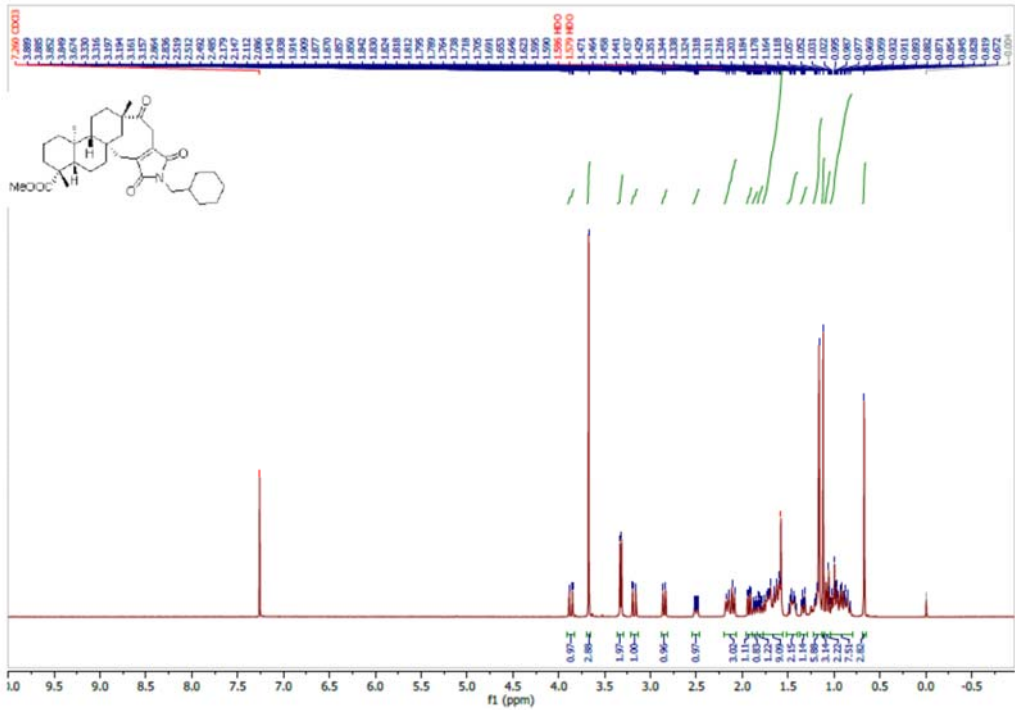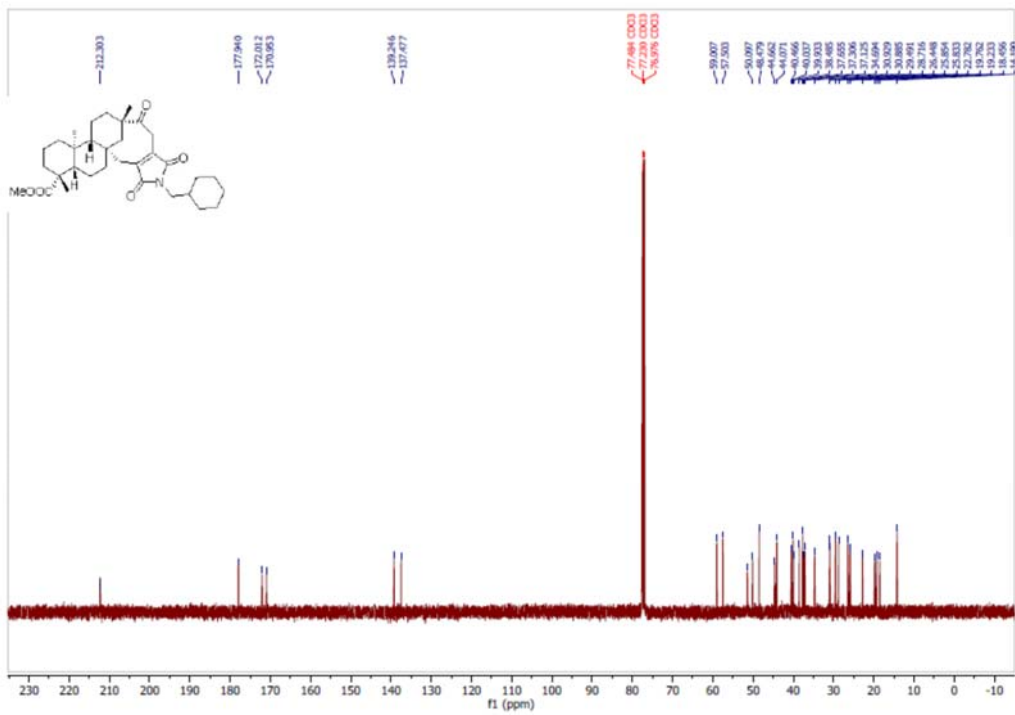

Supplementary Figure 182. <sup>1</sup>H and <sup>13</sup>C spectra of 47af.

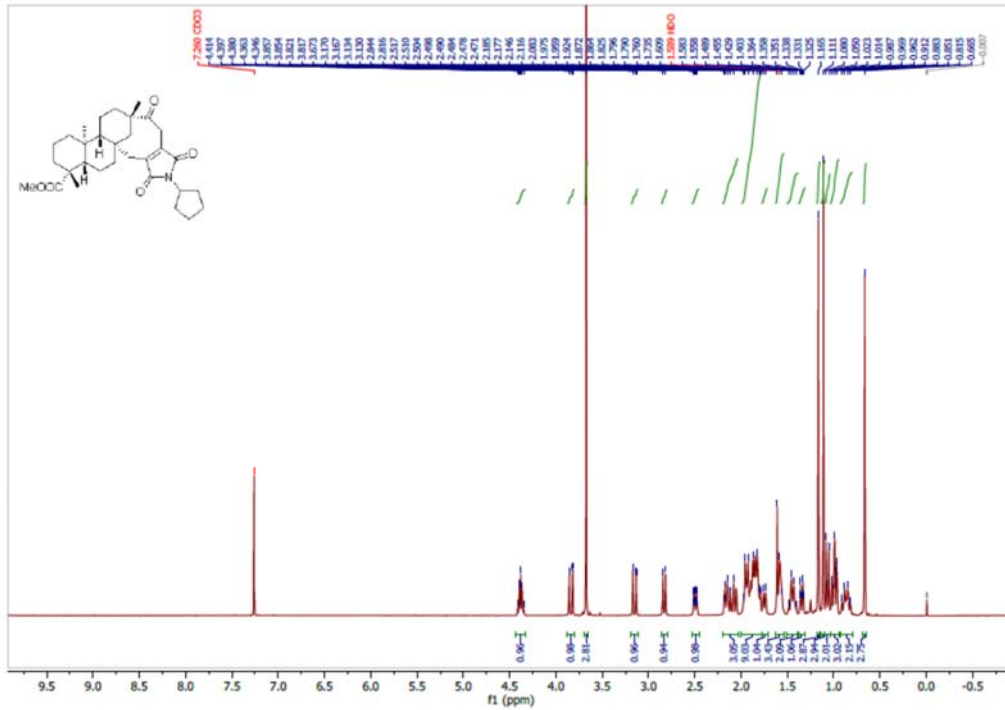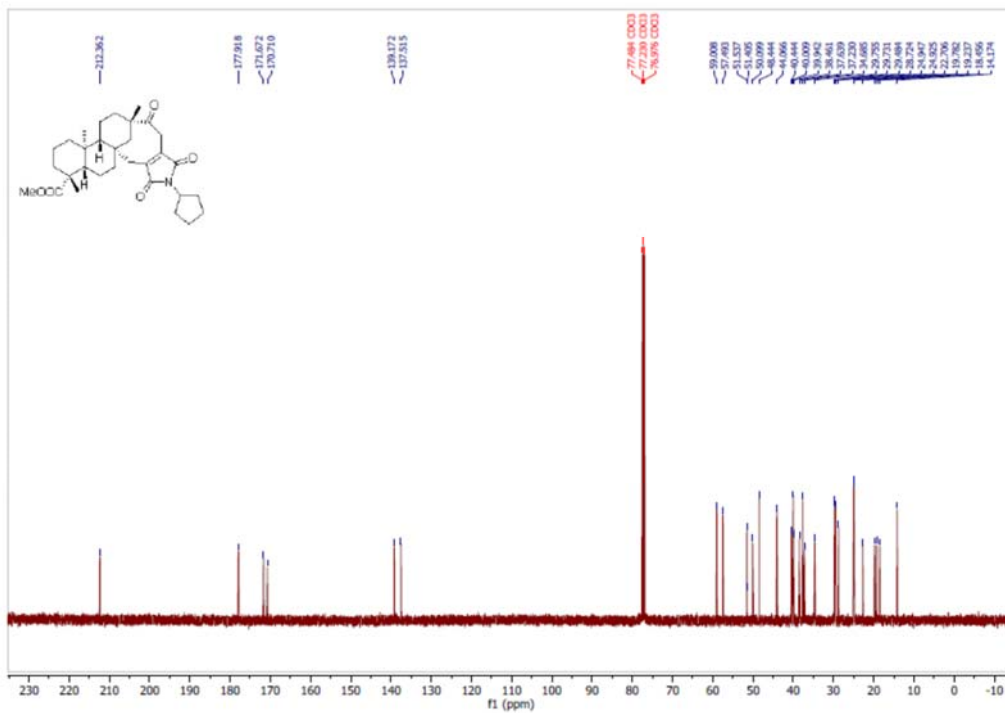

Supplementary Figure 183. <sup>1</sup>H and <sup>13</sup>C spectra of 47ag.

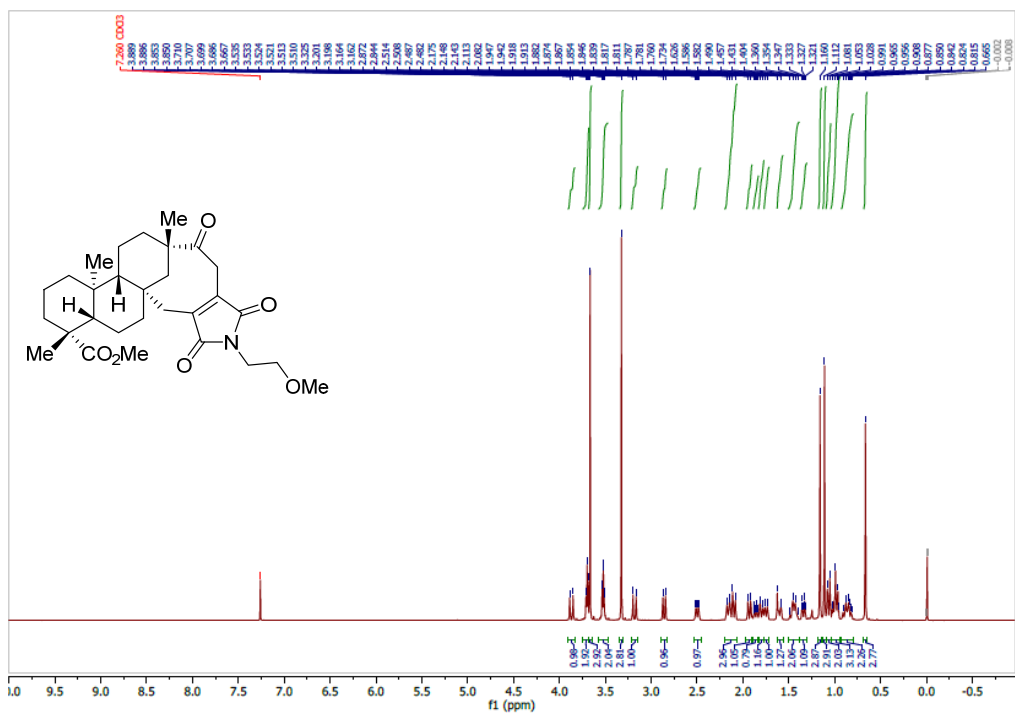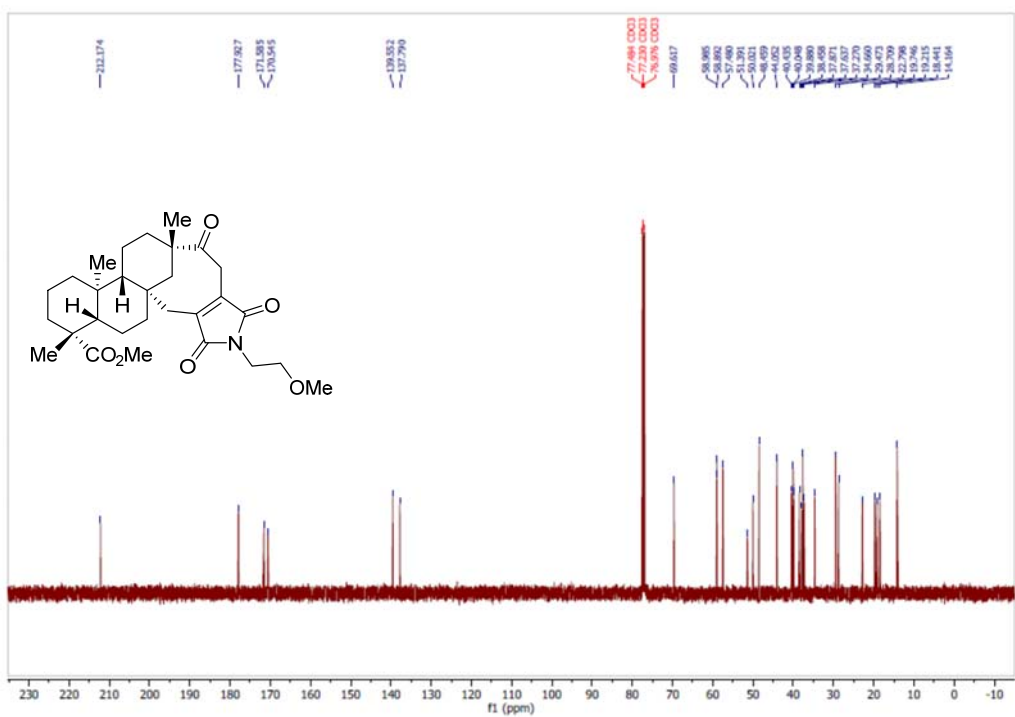

Supplementary Figure 184. <sup>1</sup>H and <sup>13</sup>C spectra of 47ah.

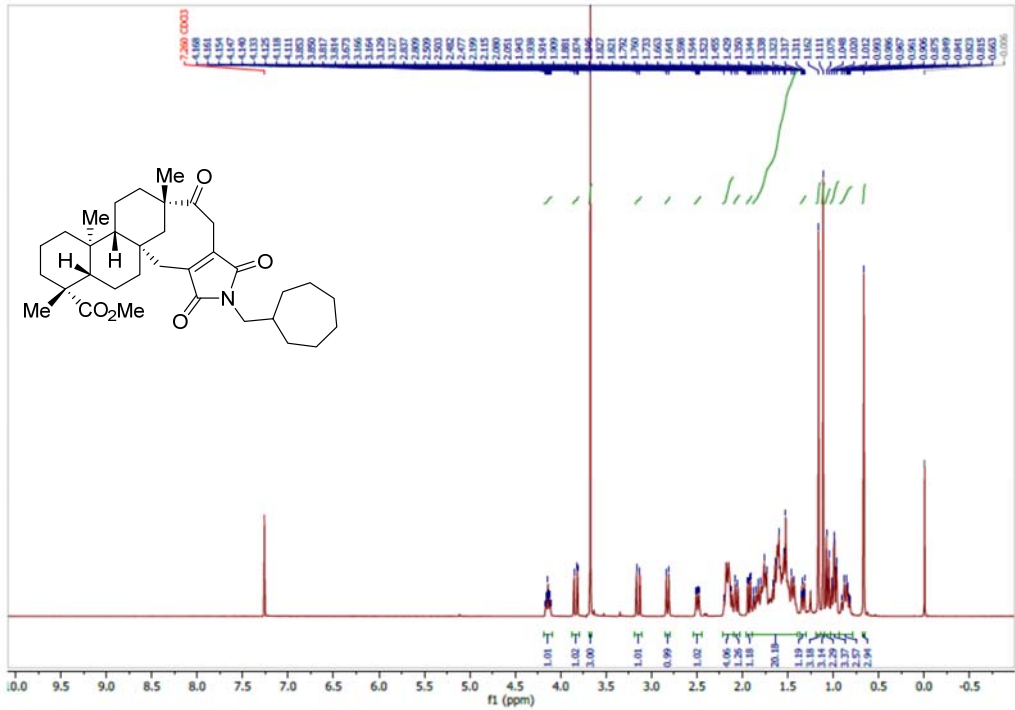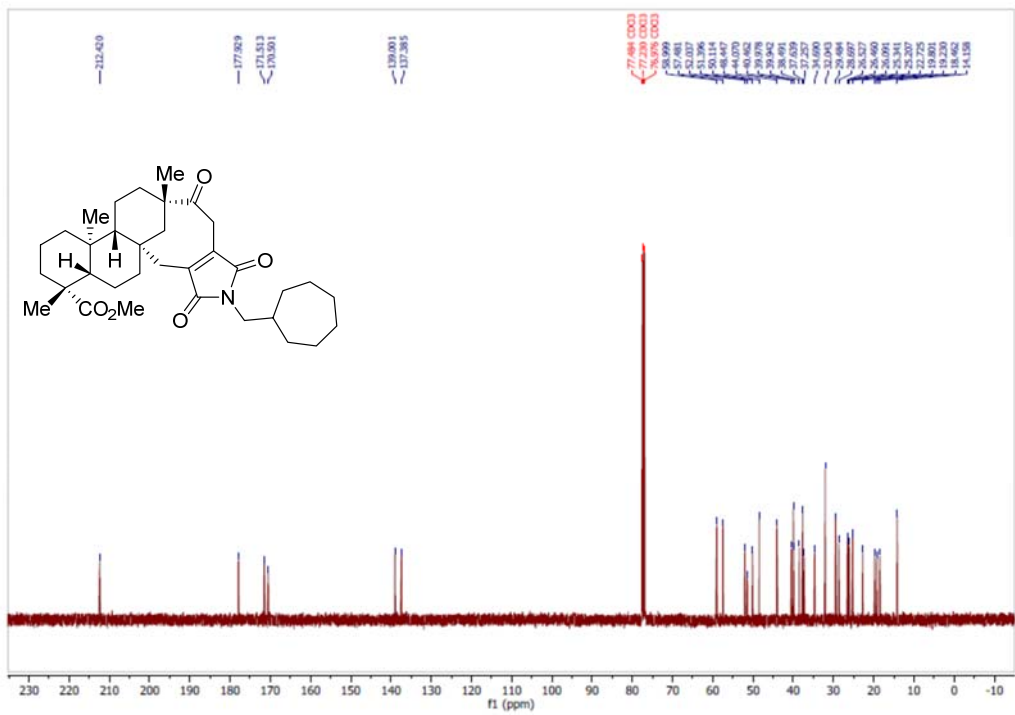

Supplementary Figure 185. <sup>1</sup>H and <sup>13</sup>C spectra of 47ai.



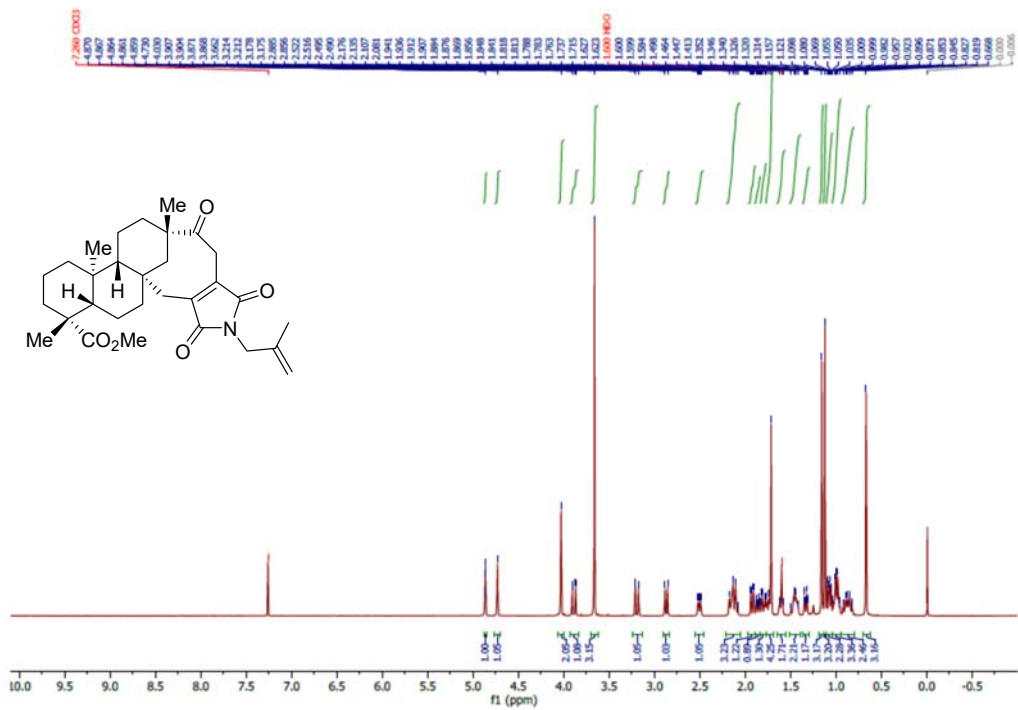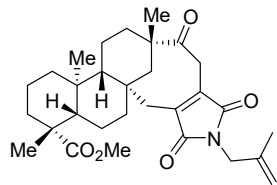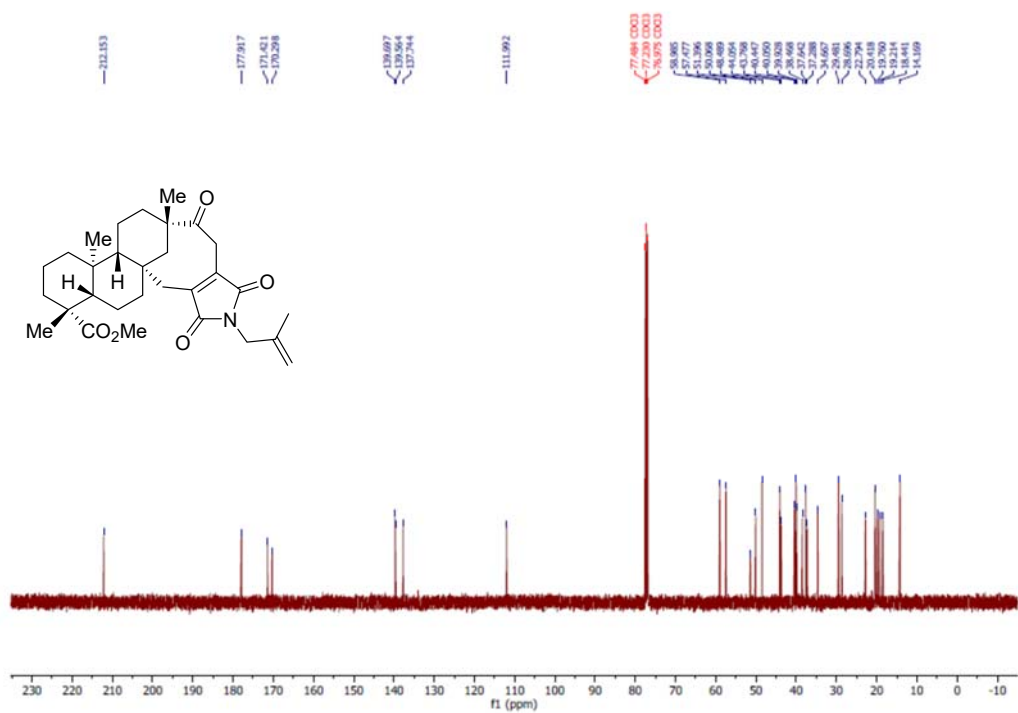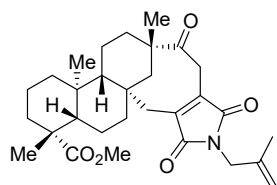

Supplementary Figure 186. <sup>1</sup>H and <sup>13</sup>C spectra of 47aj.





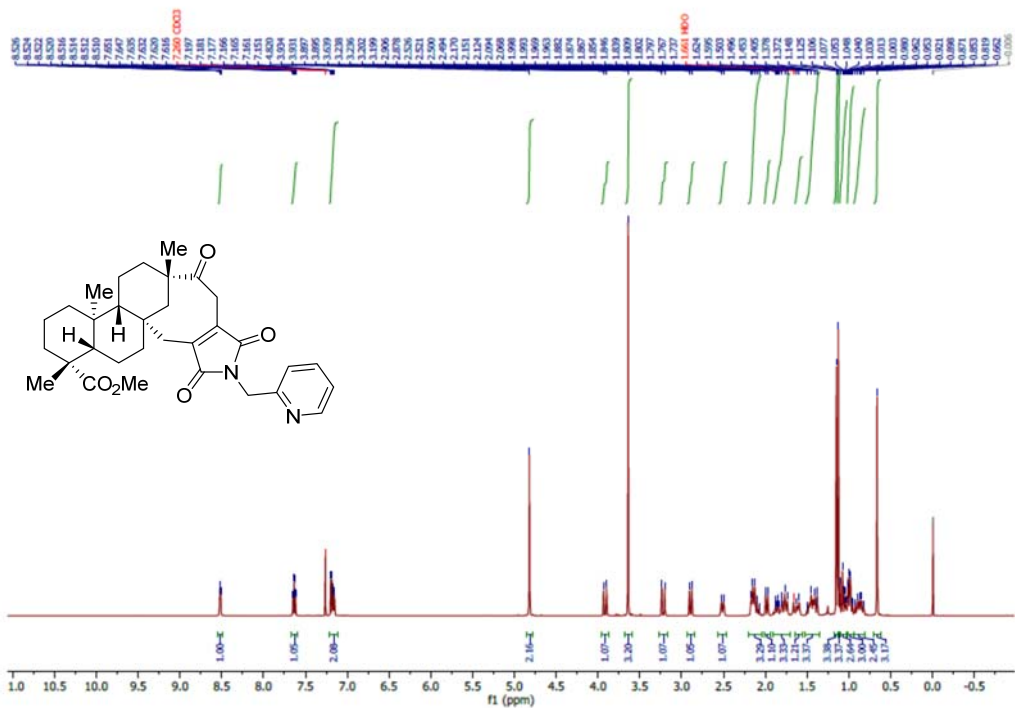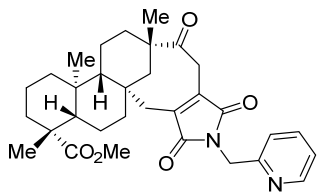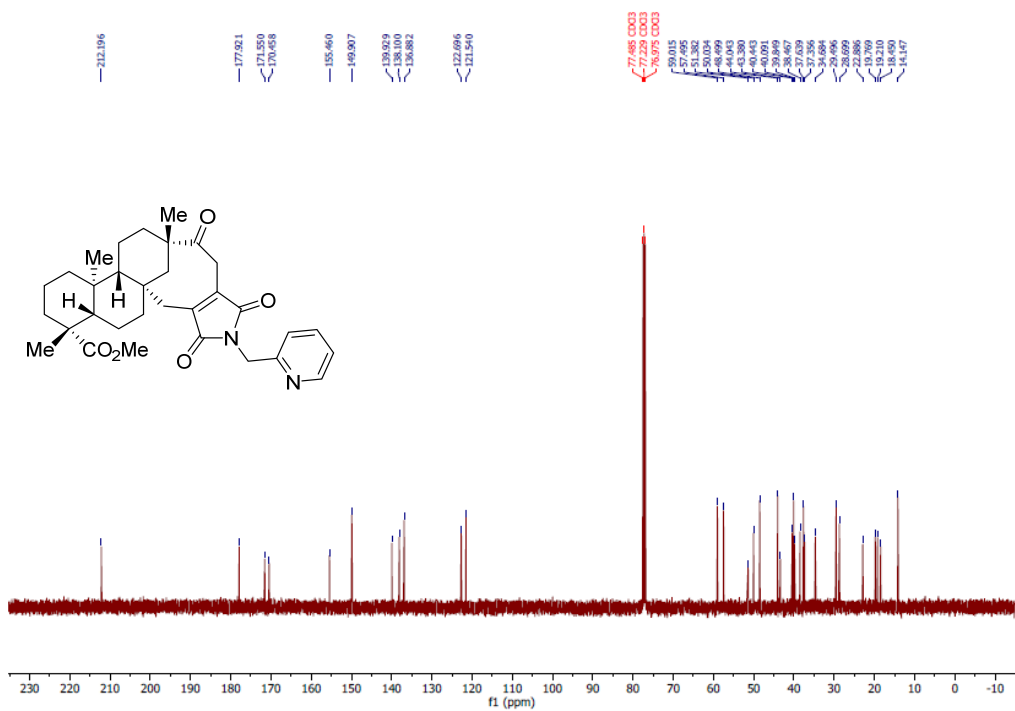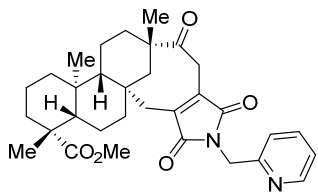

Supplementary Figure 189. <sup>1</sup>H and <sup>13</sup>C spectra of 47am.



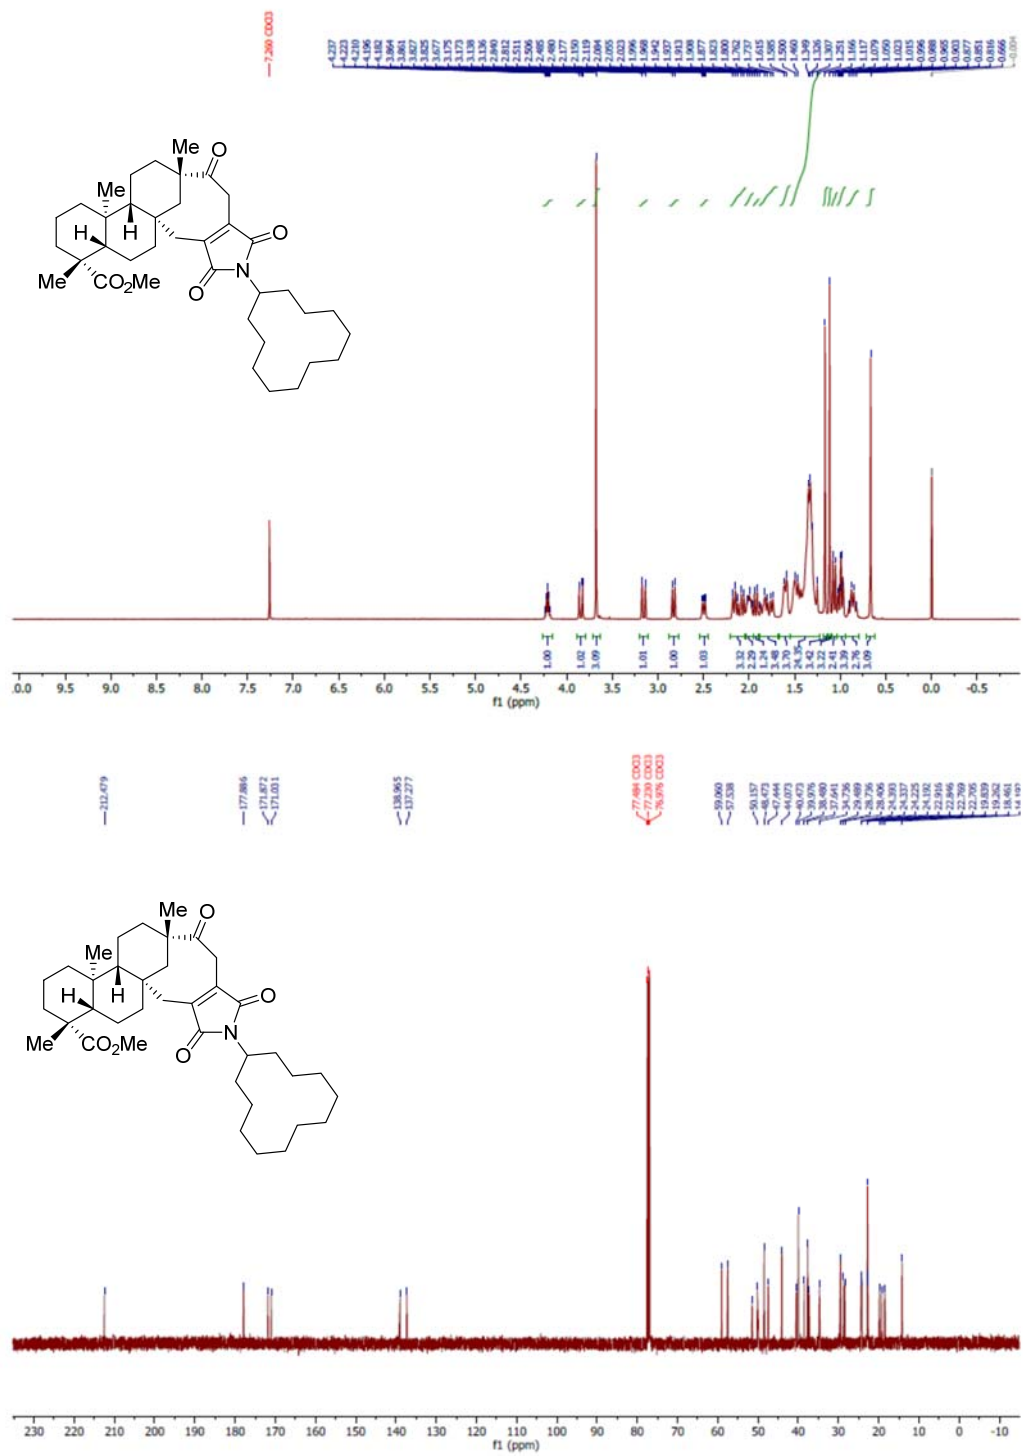

Supplementary Figure 191. <sup>1</sup>H and <sup>13</sup>C spectra of 47ao.

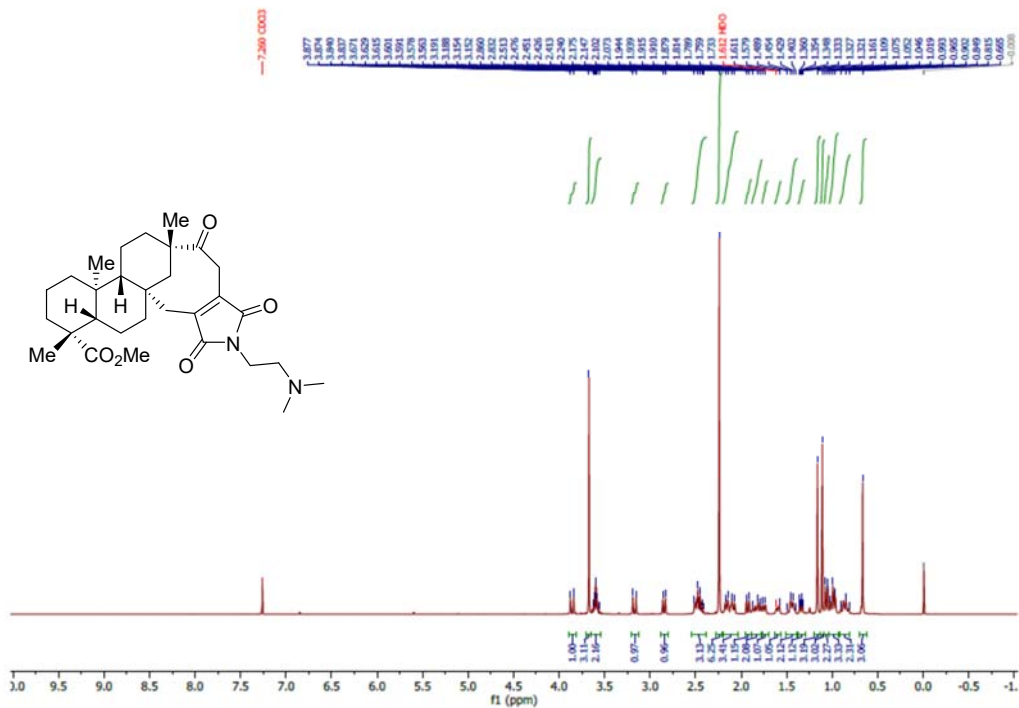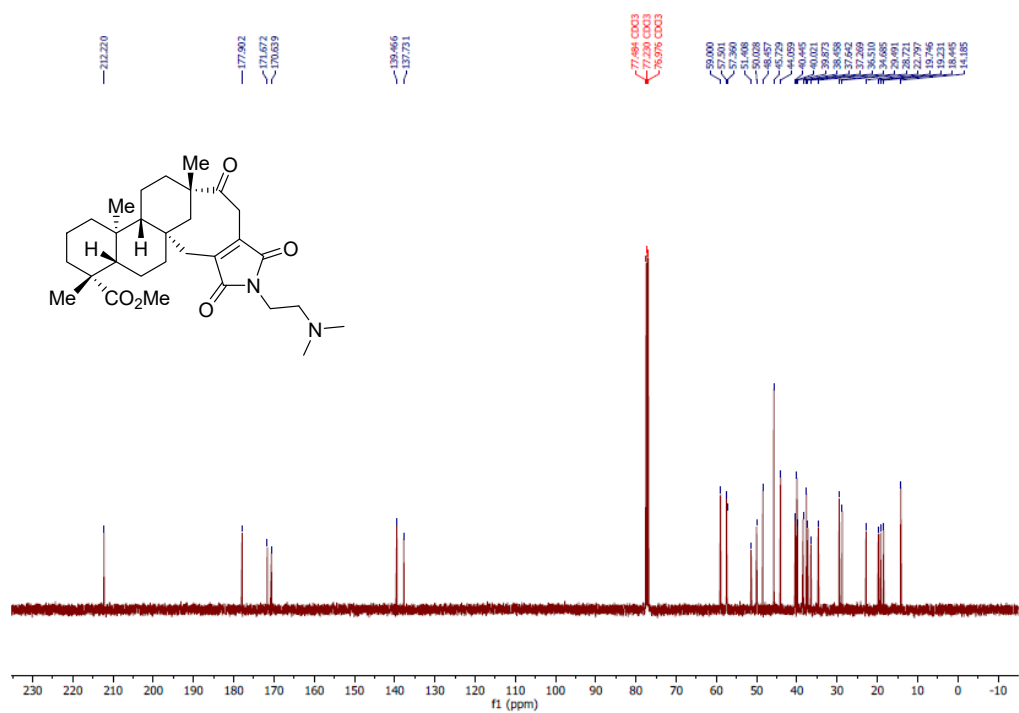

Supplementary Figure 192.  $^1\text{H}$  and  $^{13}\text{C}$  spectra of 47ap.

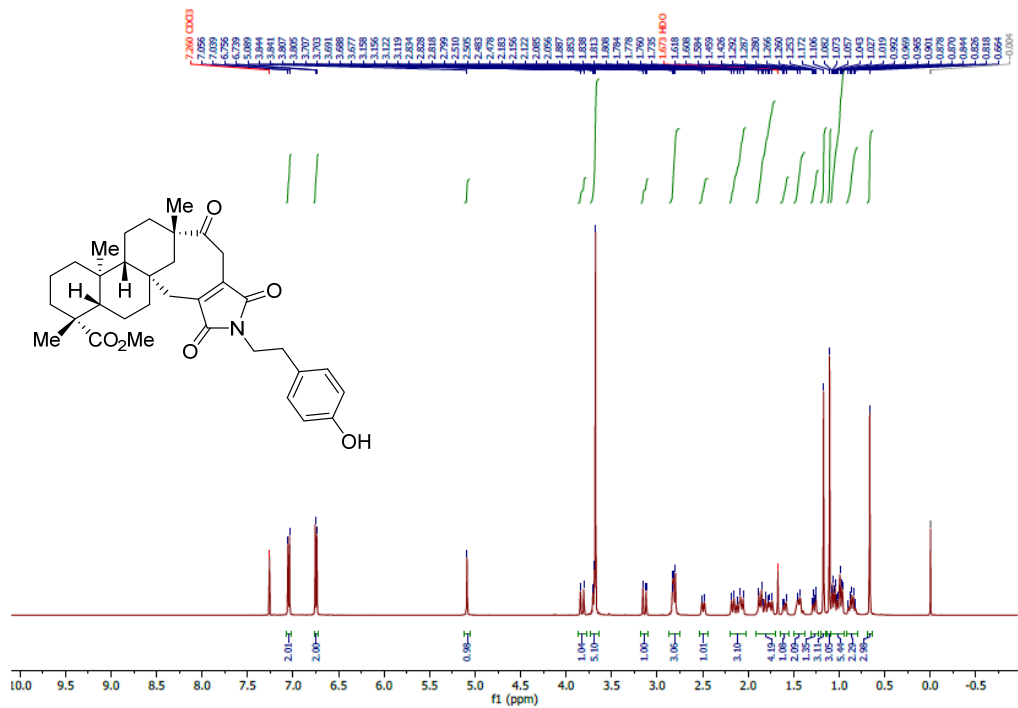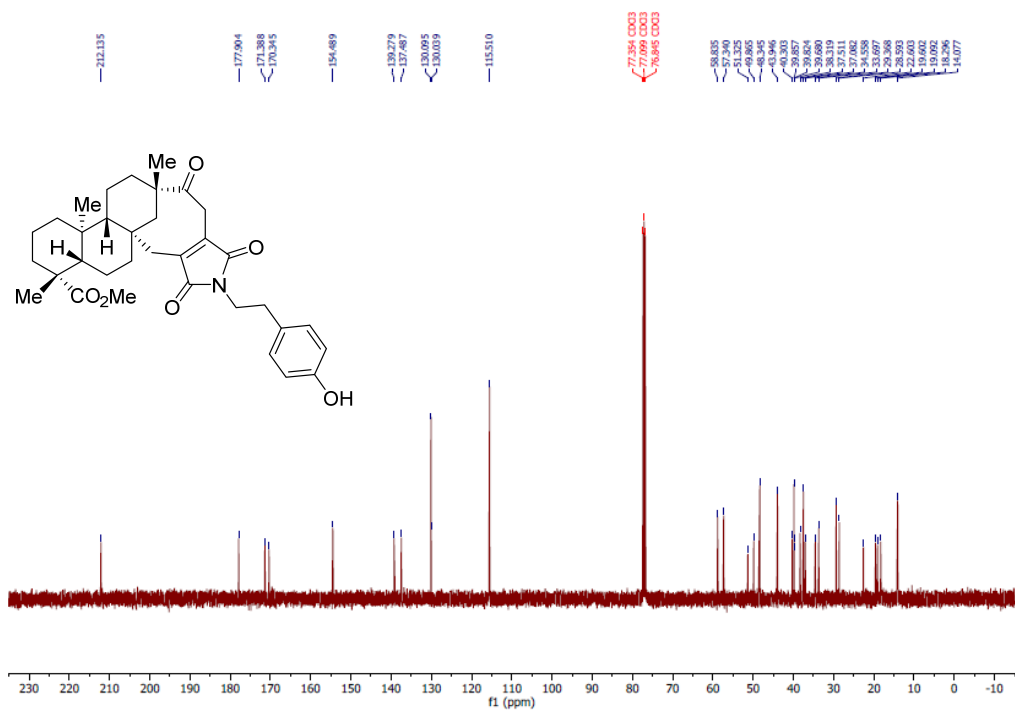

Supplementary Figure 193. <sup>1</sup>H and <sup>13</sup>C spectra of 47aq.







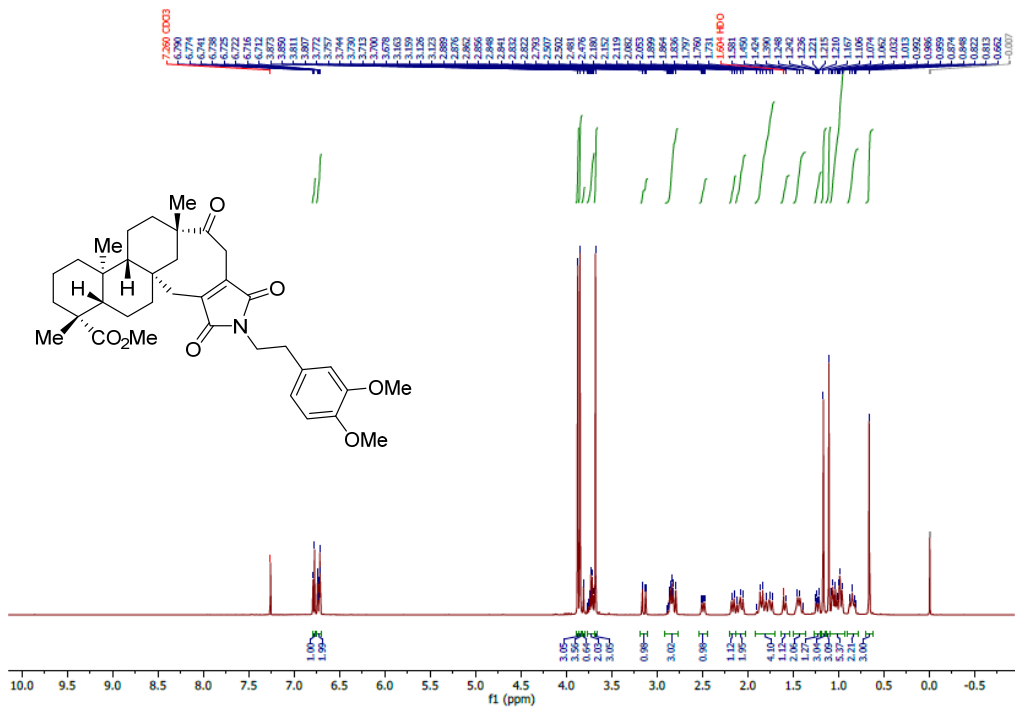



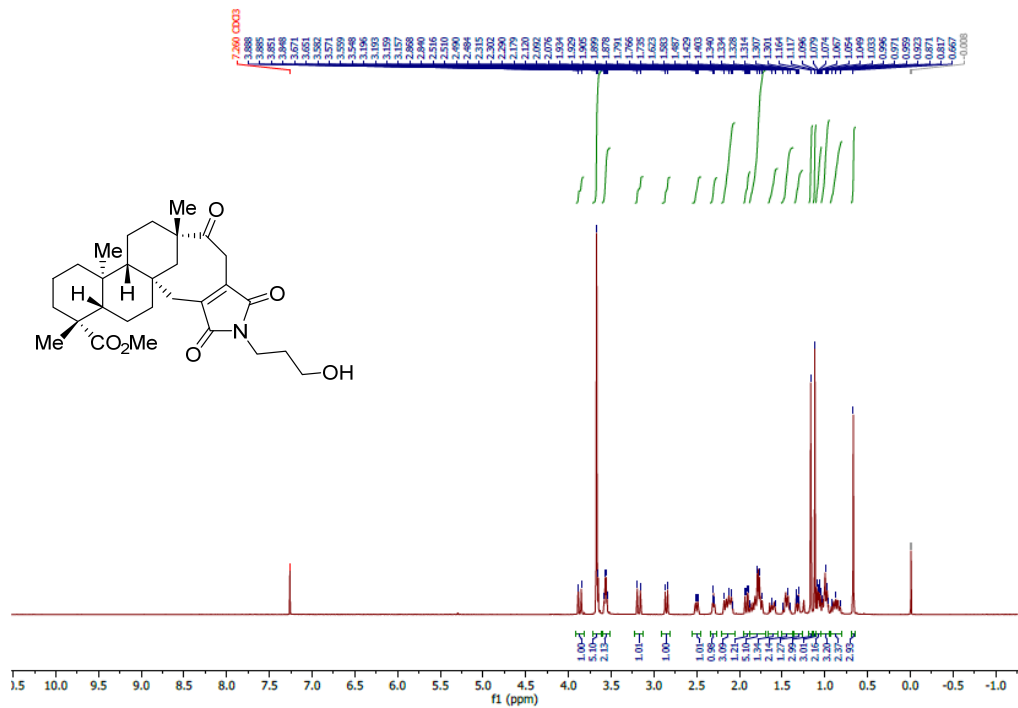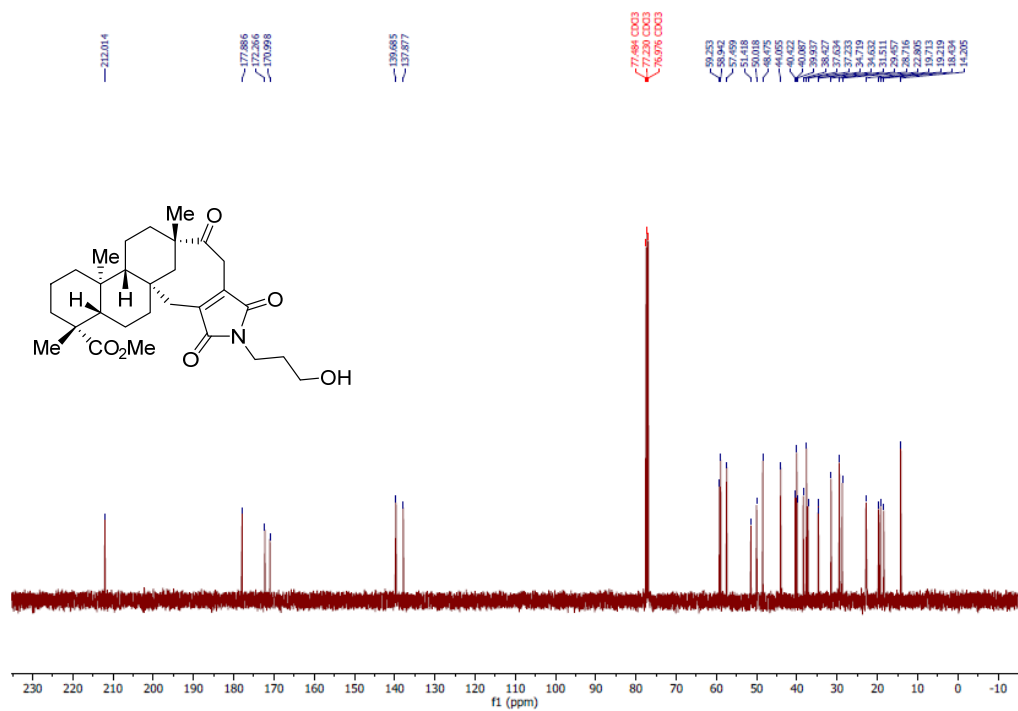

Supplementary Figure 198. <sup>1</sup>H and <sup>13</sup>C spectra of 47av.

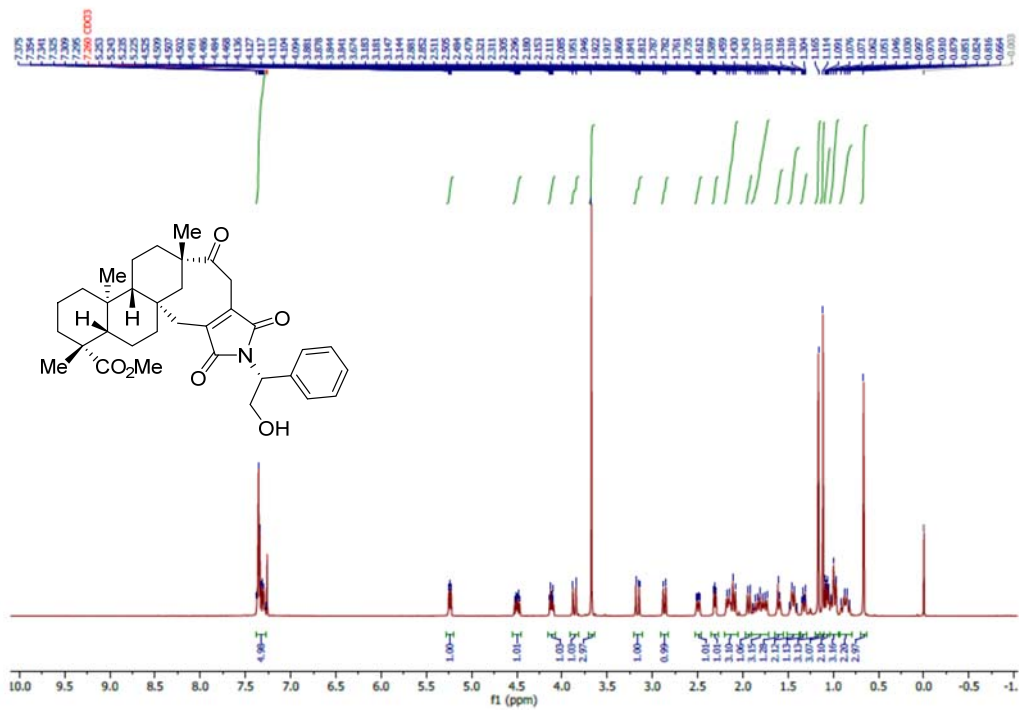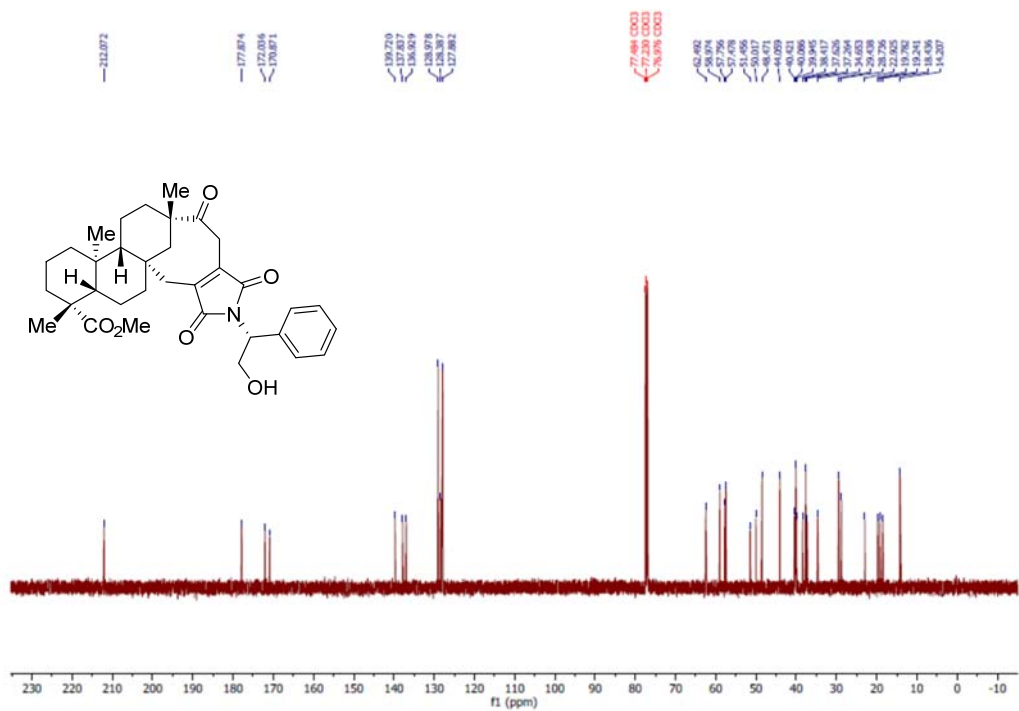

Supplementary Figure 199. <sup>1</sup>H and <sup>13</sup>C spectra of 47aw.

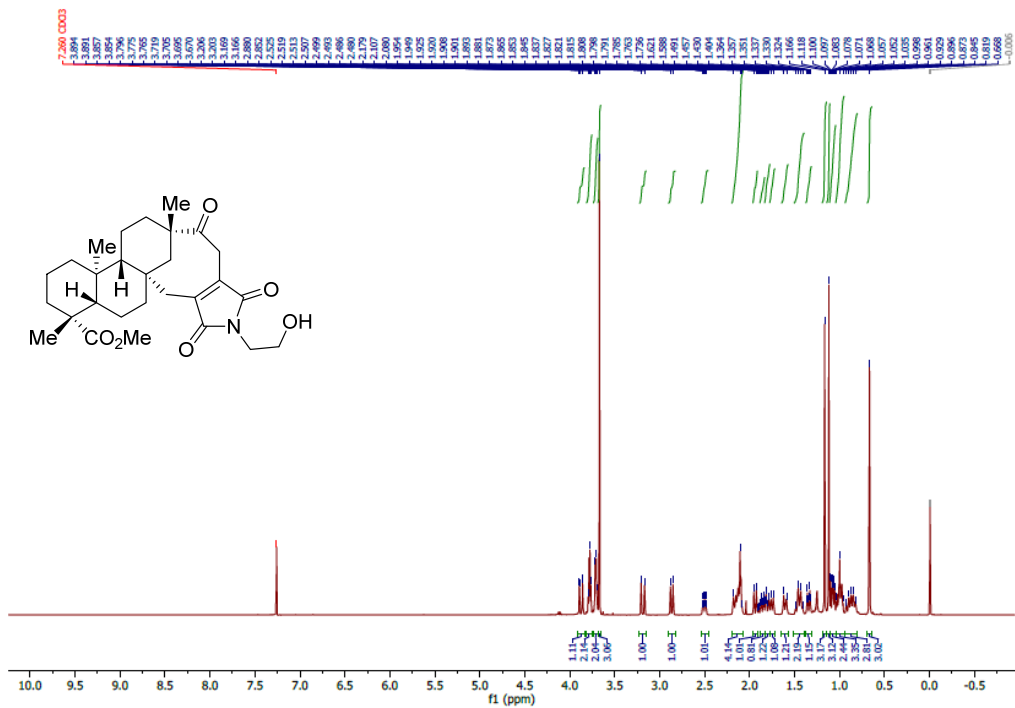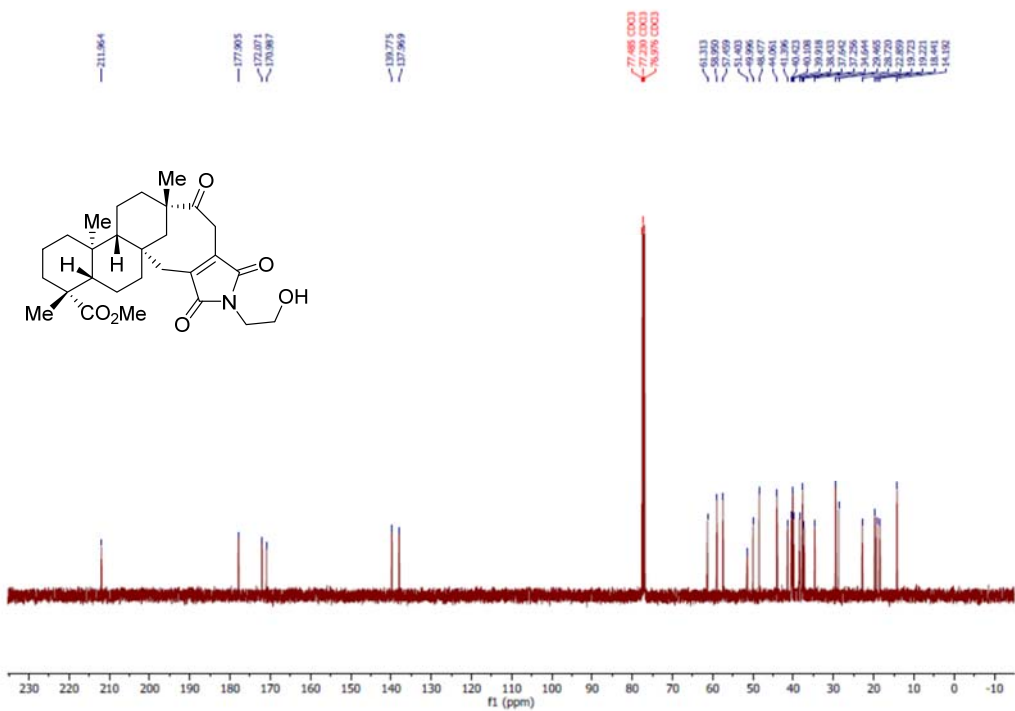

Supplementary Figure 200. <sup>1</sup>H and <sup>13</sup>C spectra of 47ax.

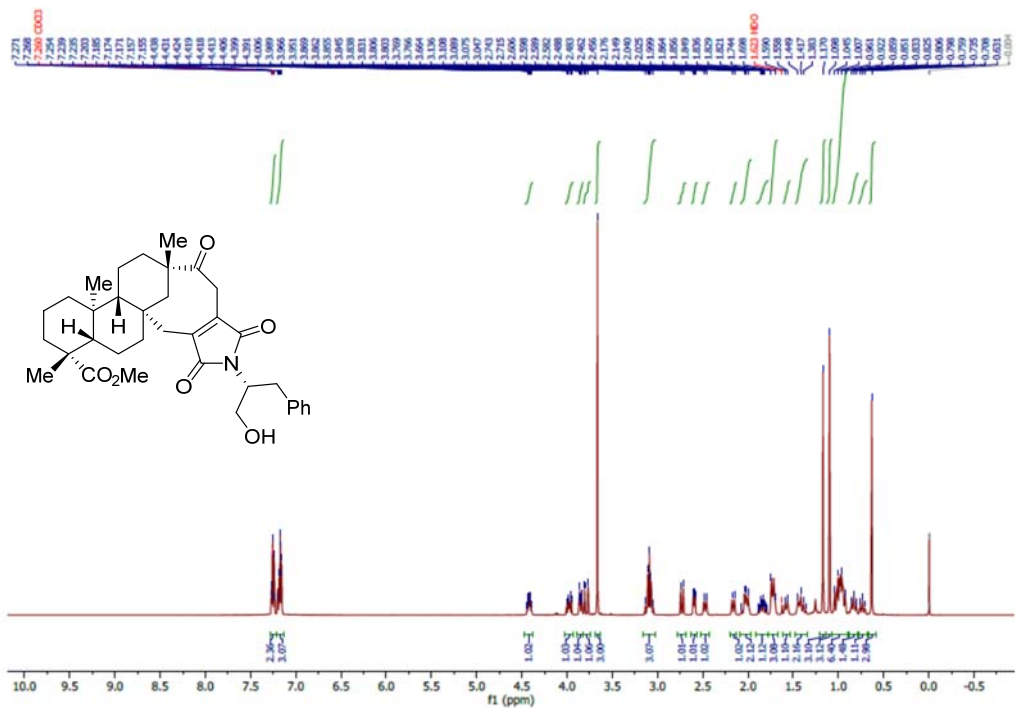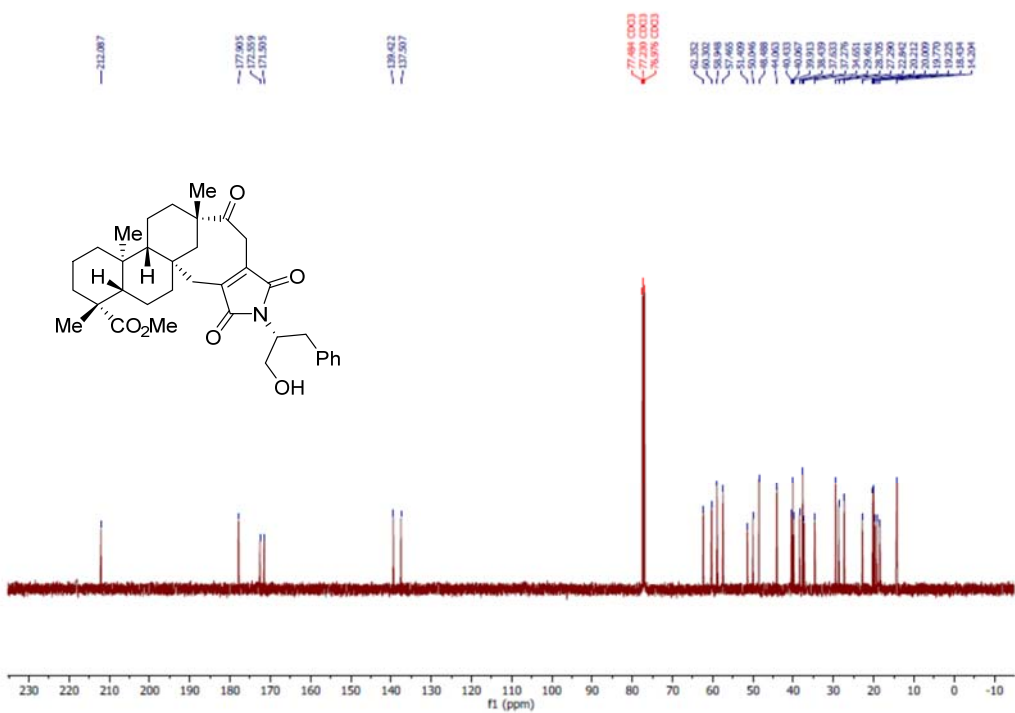

Supplementary Figure 201. <sup>1</sup>H and <sup>13</sup>C spectra of 47ay.



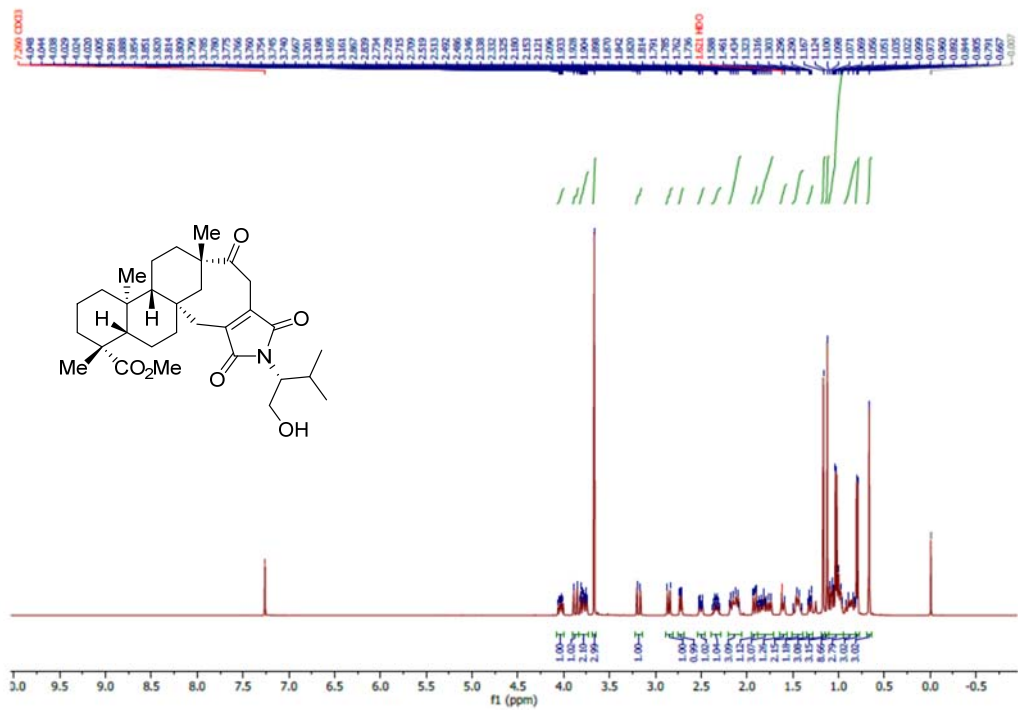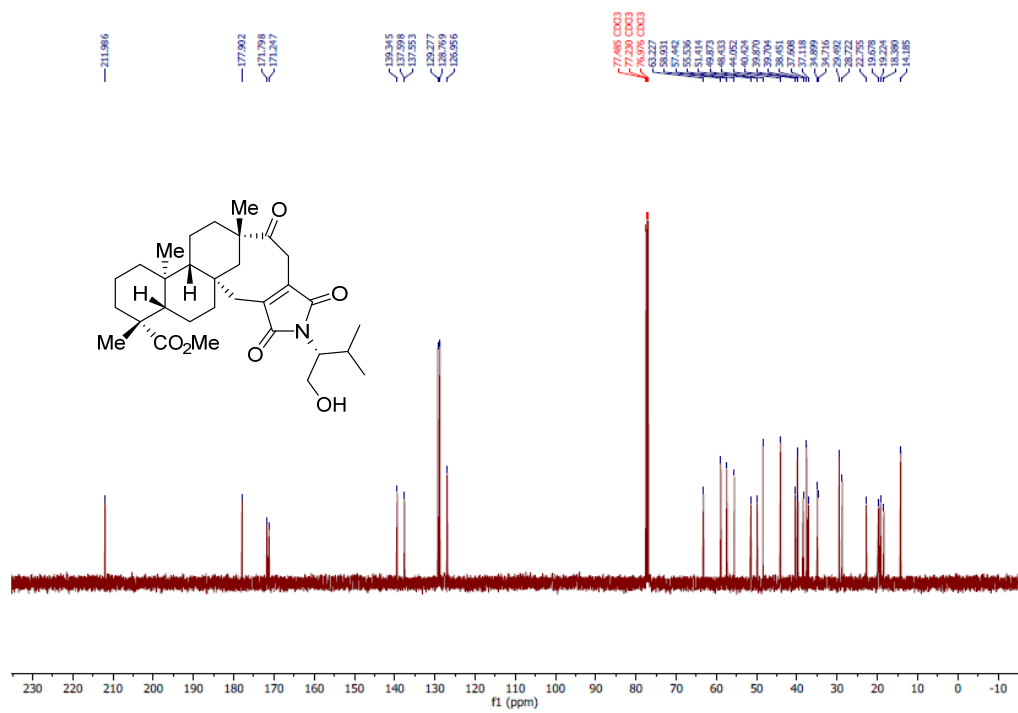

Supplementary Figure 202. <sup>1</sup>H and <sup>13</sup>C spectra of 47az.



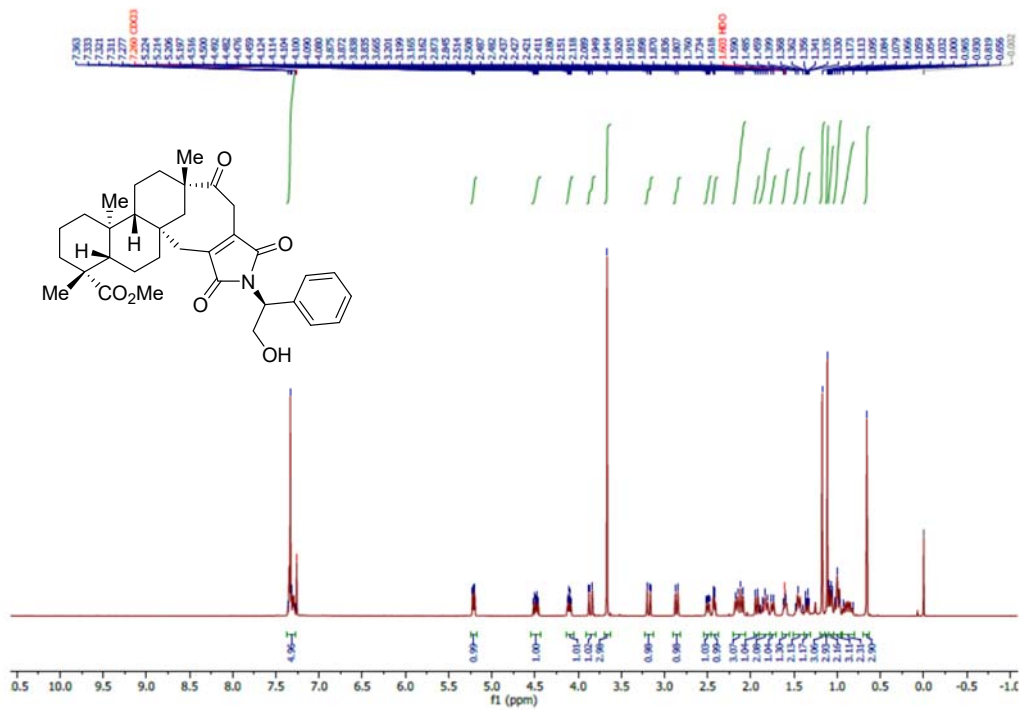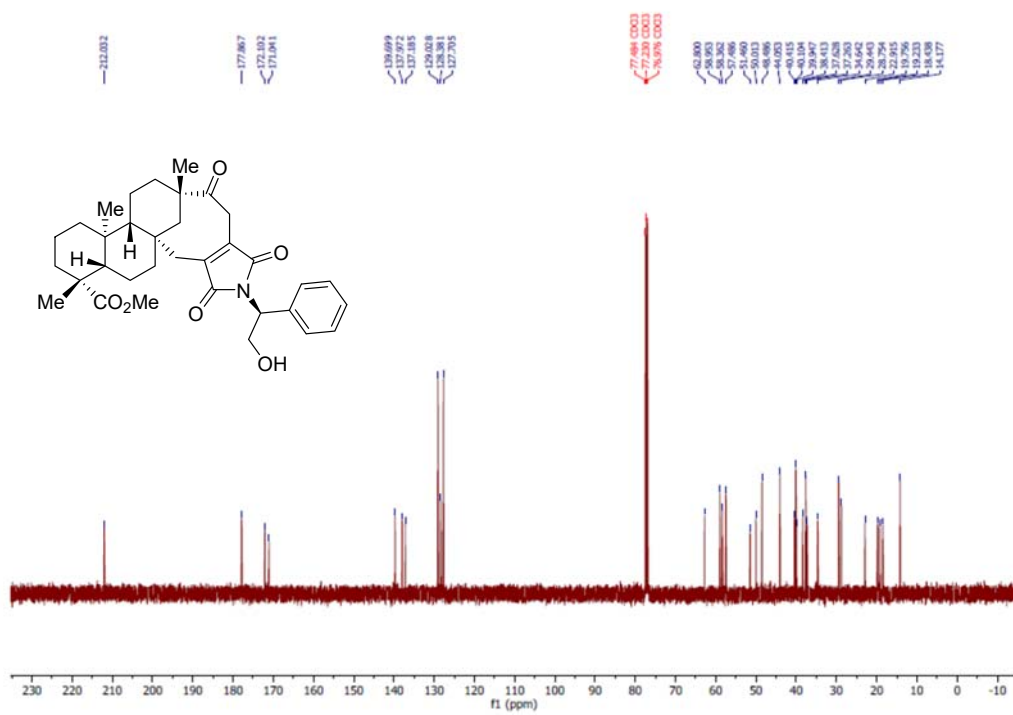

Supplementary Figure 204. <sup>1</sup>H and <sup>13</sup>C spectra of 47bb.

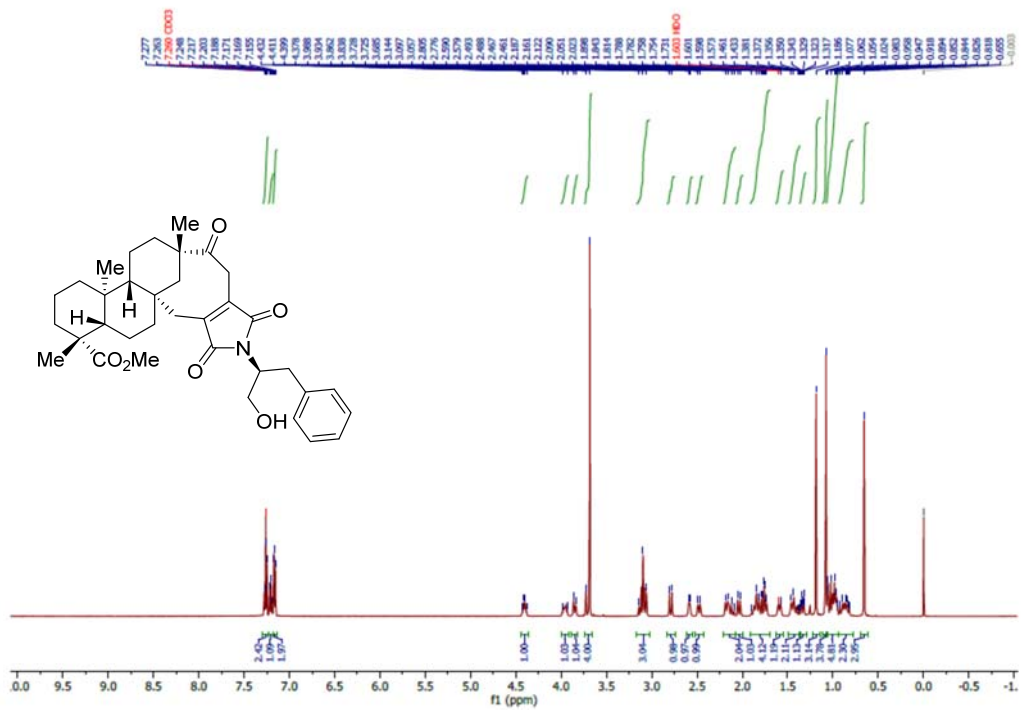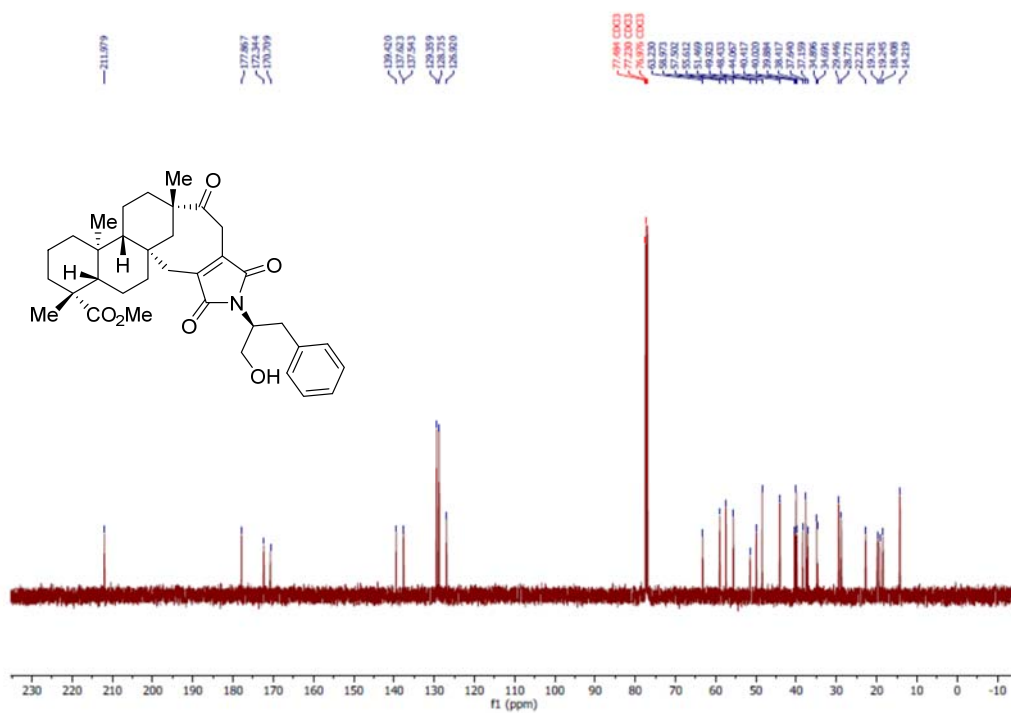

Supplementary Figure 205.  $^1\text{H}$  and  $^{13}\text{C}$  spectra of 47bc.

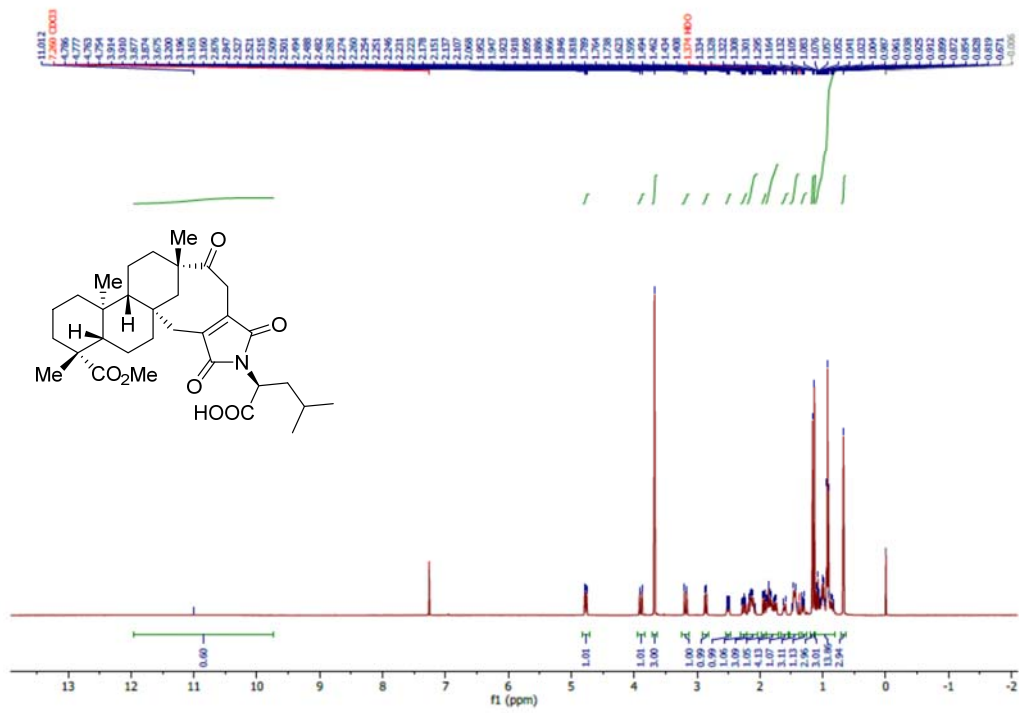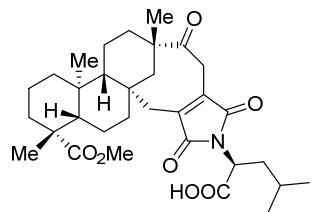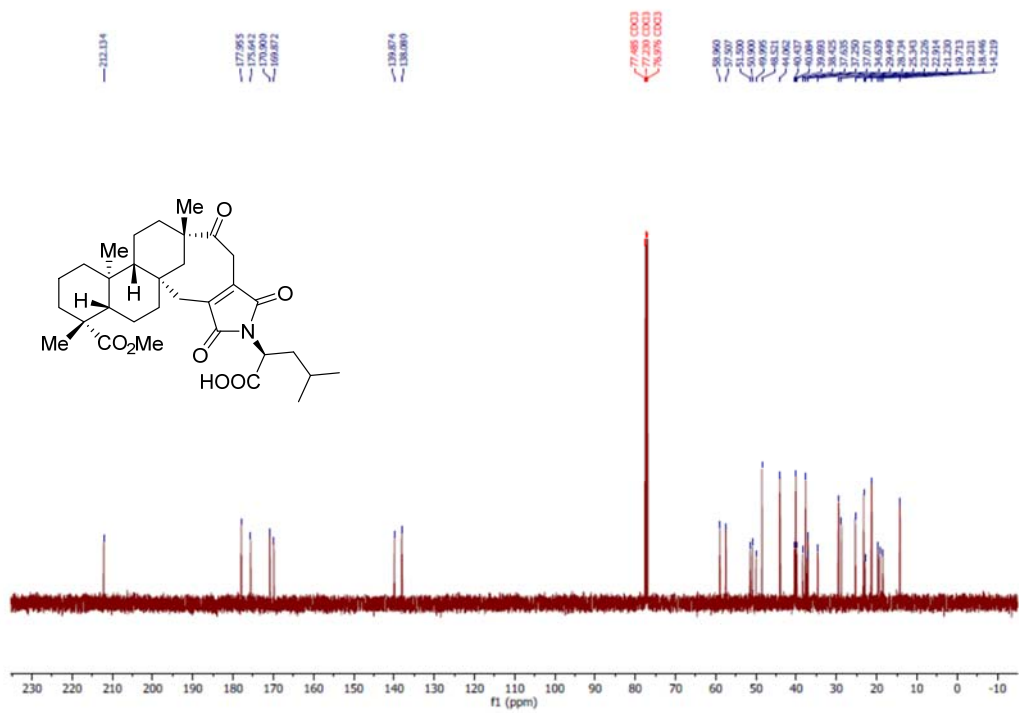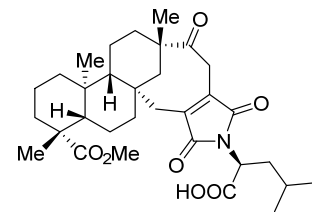

Supplementary Figure 206. <sup>1</sup>H and <sup>13</sup>C spectra of 47bd.

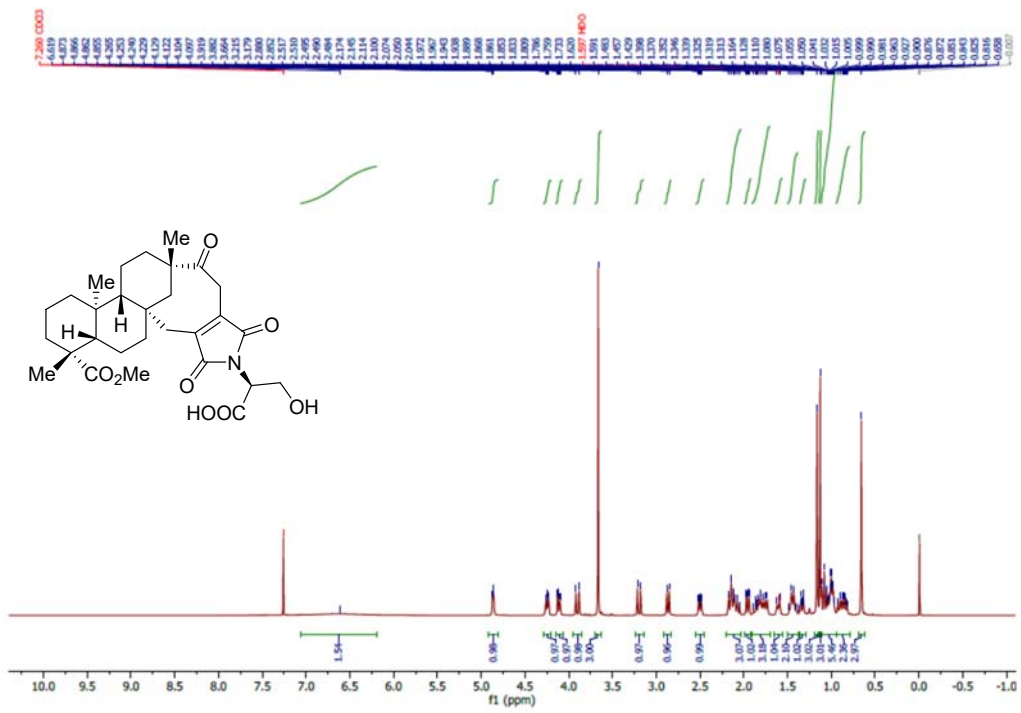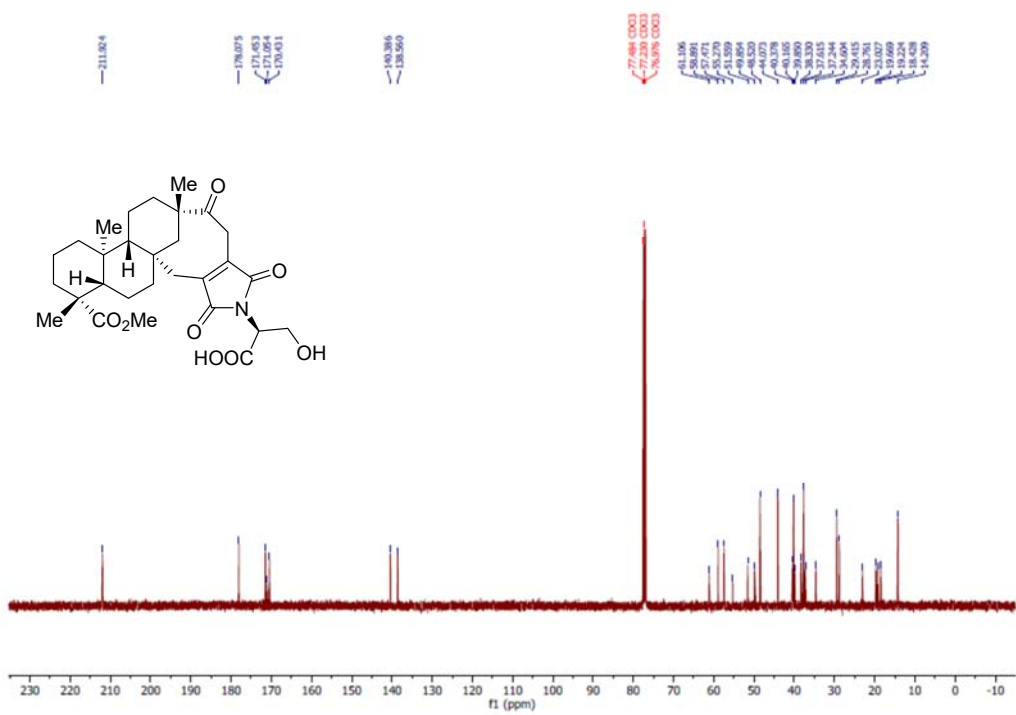

Supplementary Figure 207. <sup>1</sup>H and <sup>13</sup>C spectra of 47be.

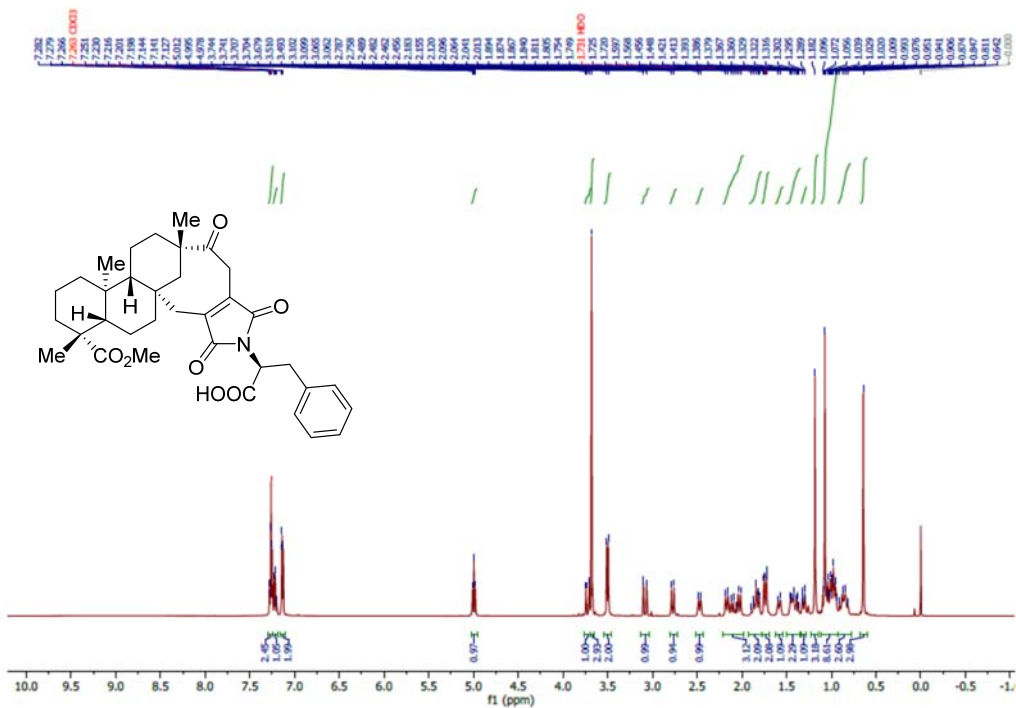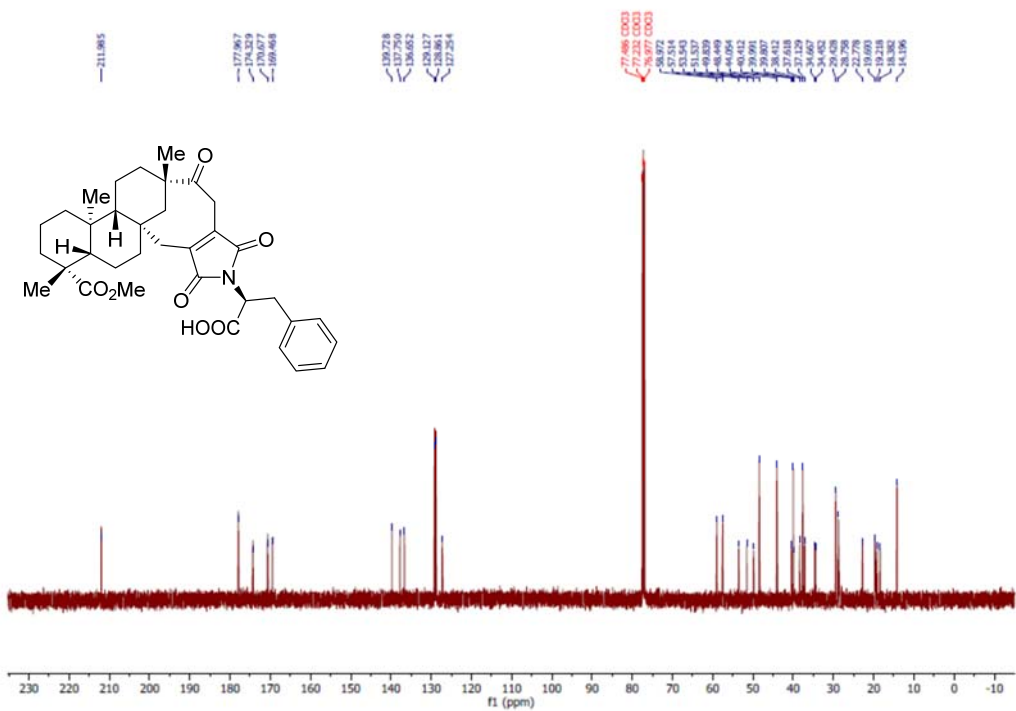

Supplementary Figure 208.  $^1\text{H}$  and  $^{13}\text{C}$  spectra of 47bf.

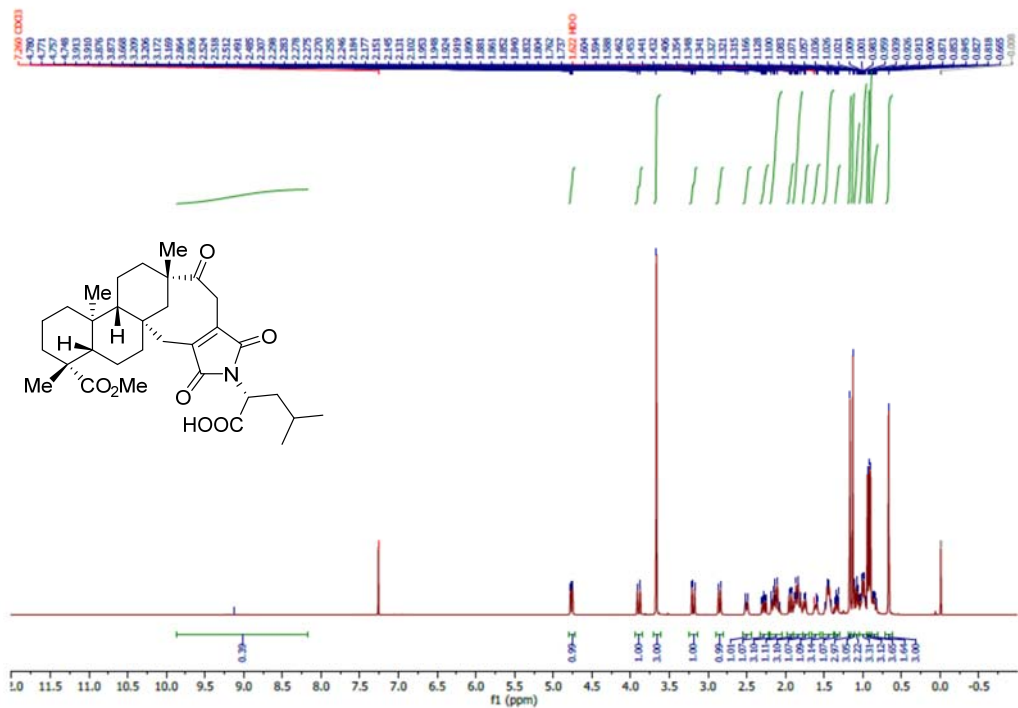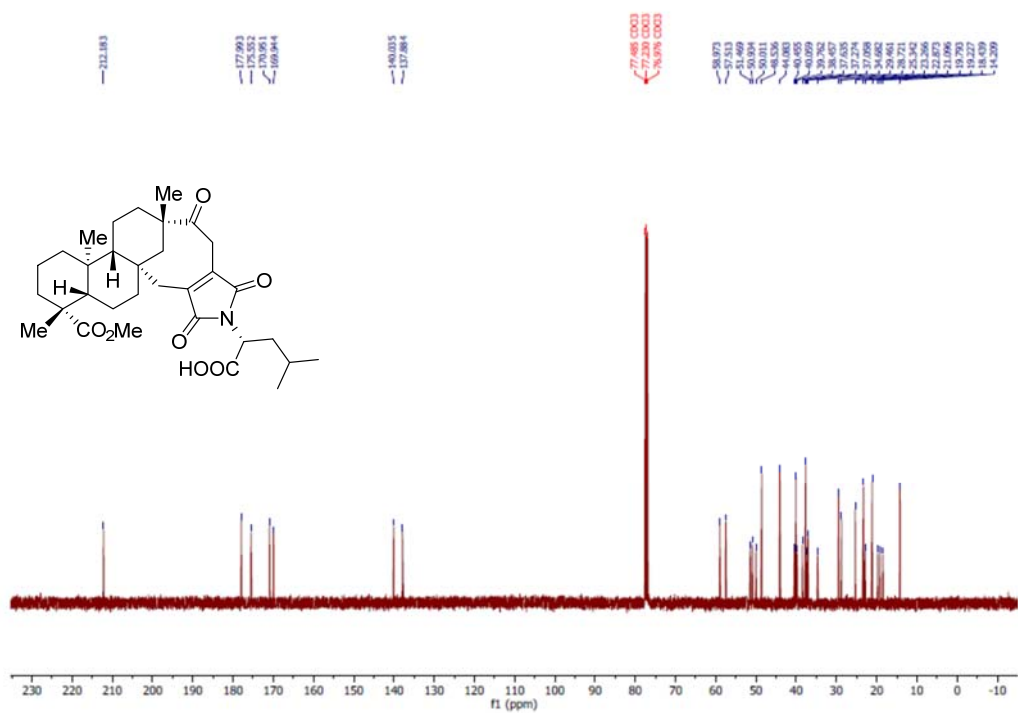

Supplementary Figure 209. <sup>1</sup>H and <sup>13</sup>C spectra of 47bg.





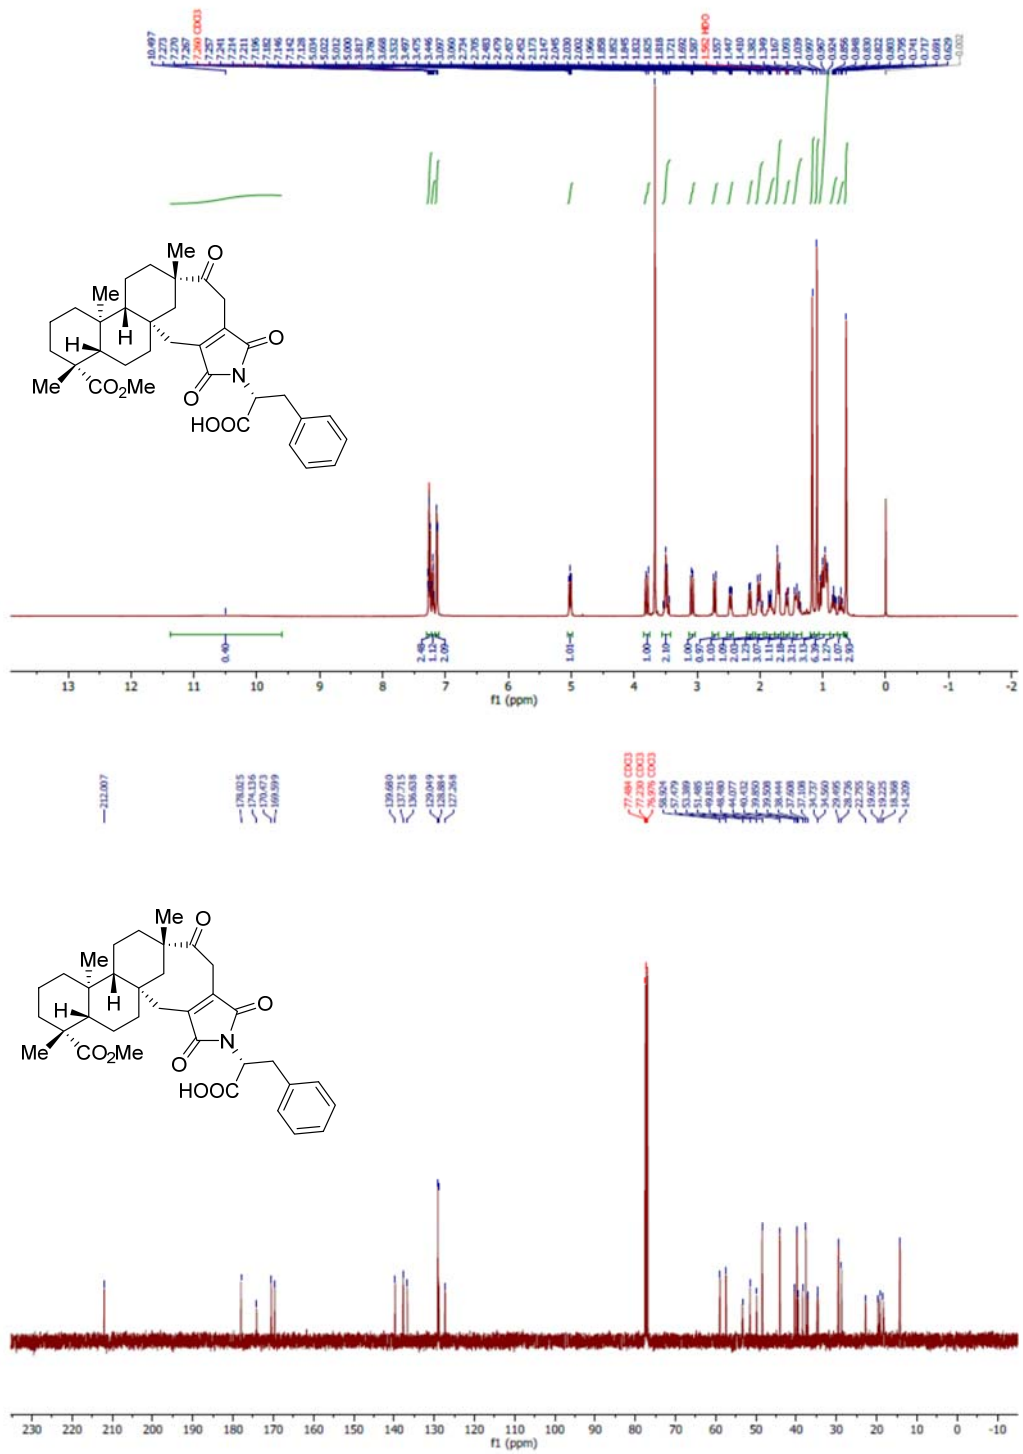

Supplementary Figure 211. <sup>1</sup>H and <sup>13</sup>C spectra of 47bi.



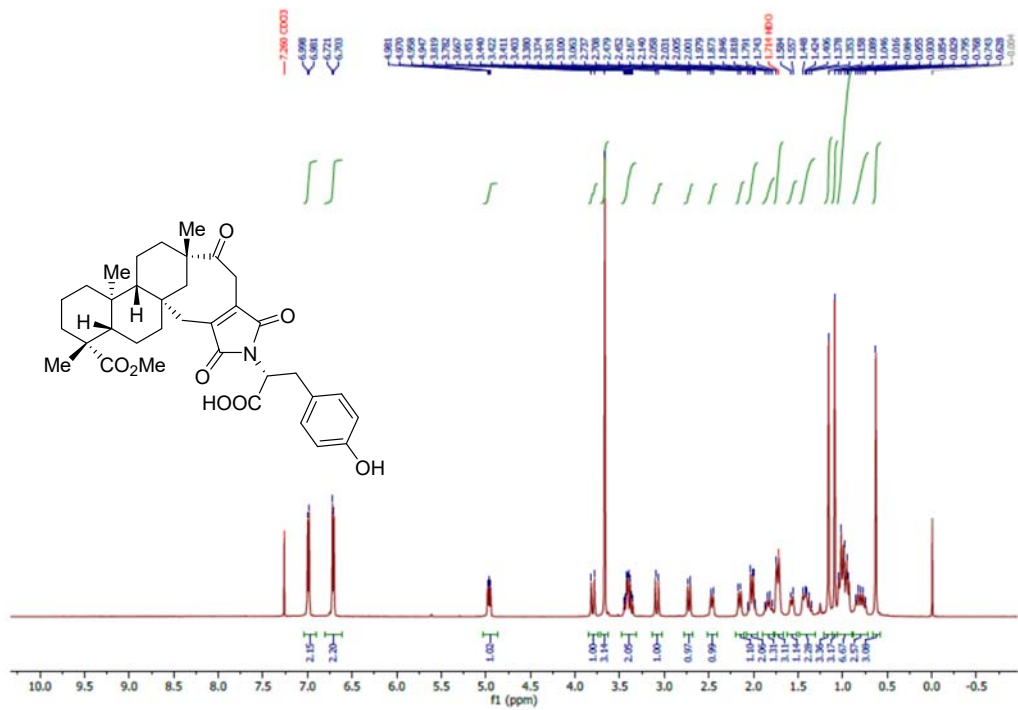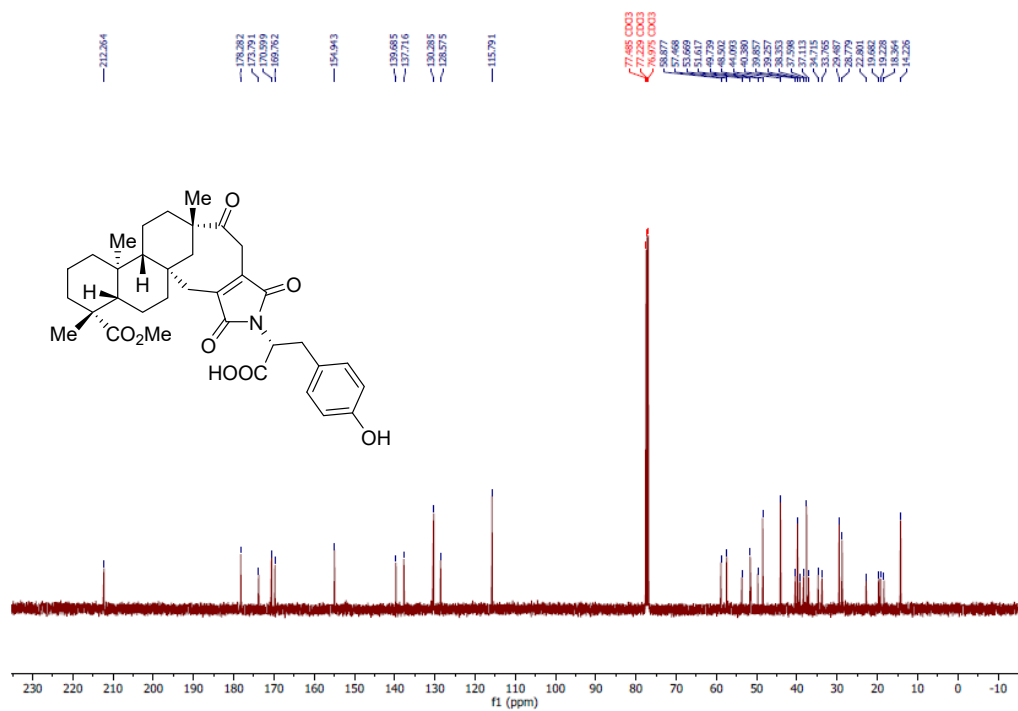

Supplementary Figure 213. <sup>1</sup>H and <sup>13</sup>C spectra of 47bk.



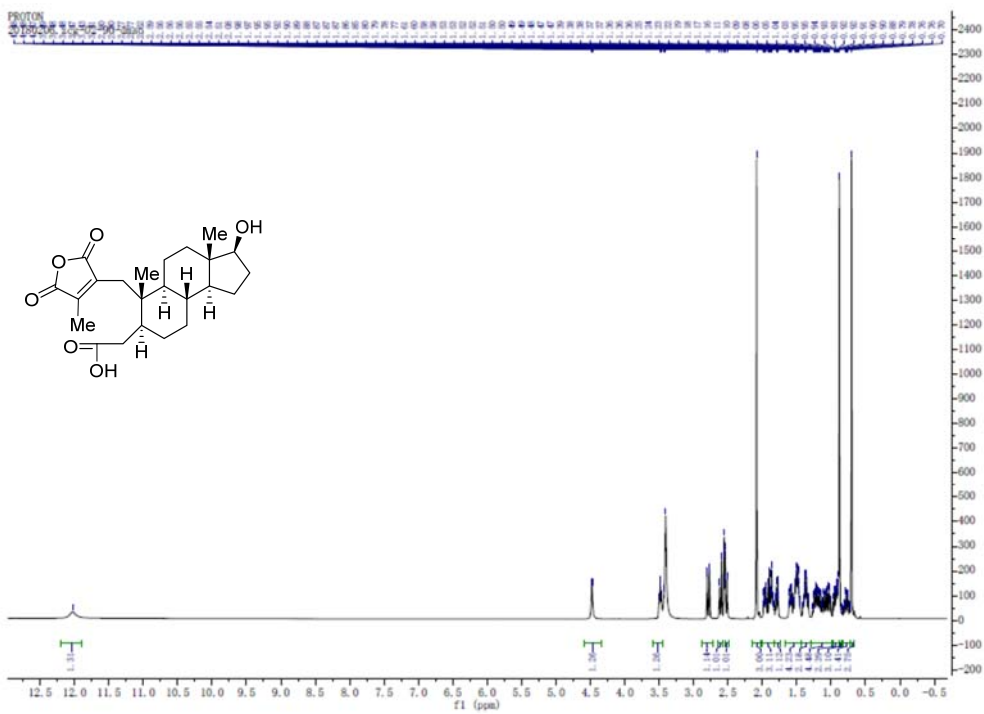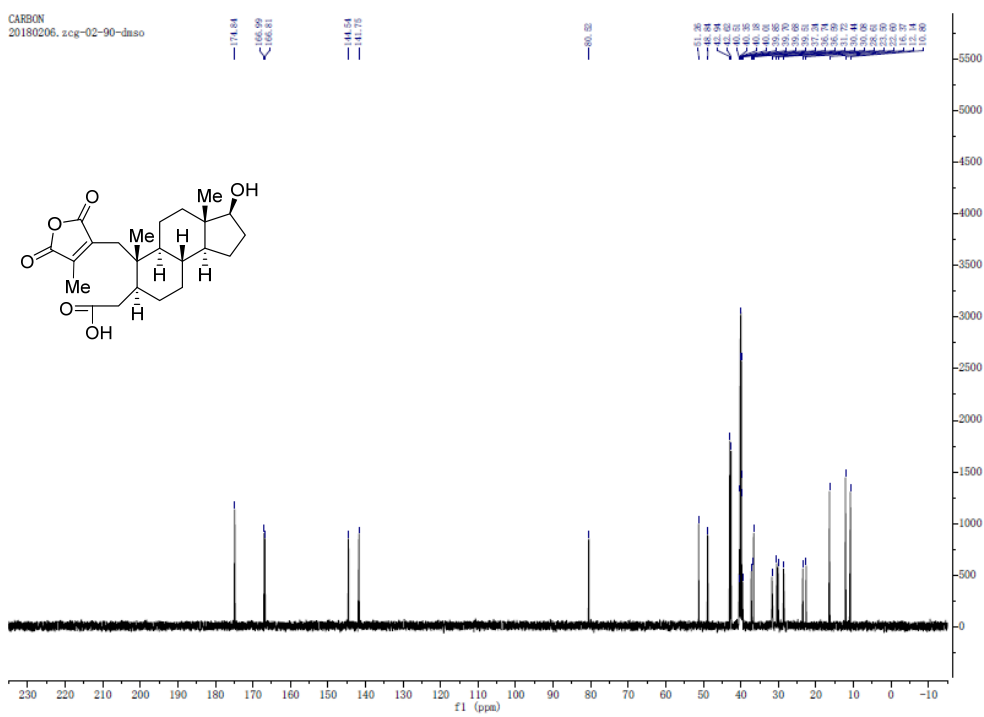

Supplementary Figure 215.  $^1\text{H}$  and  $^{13}\text{C}$  spectra of 49a.

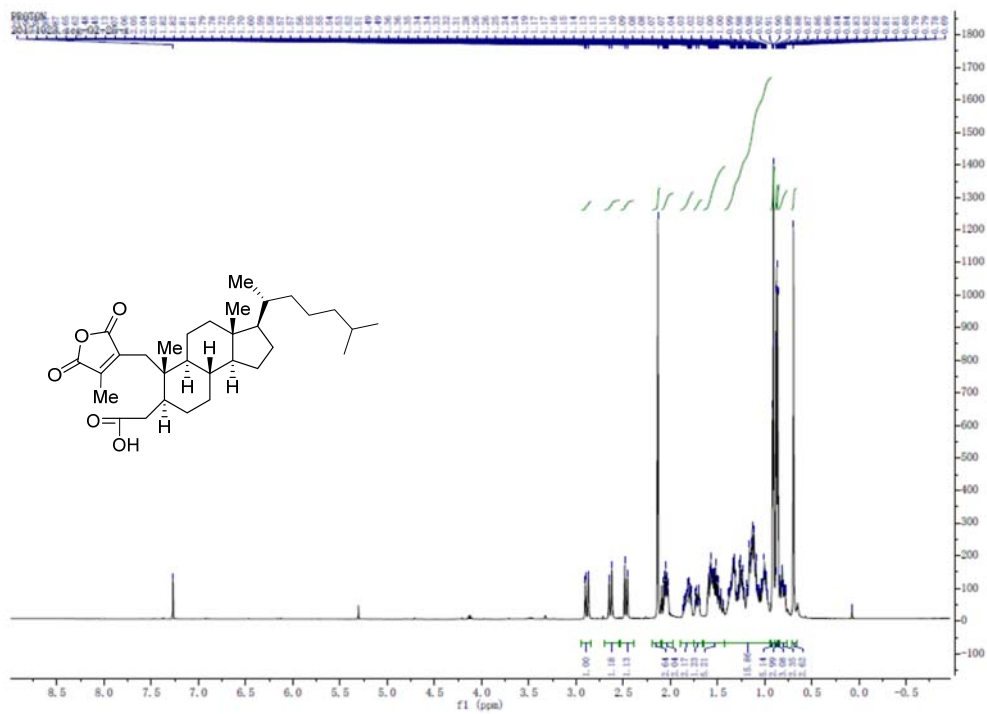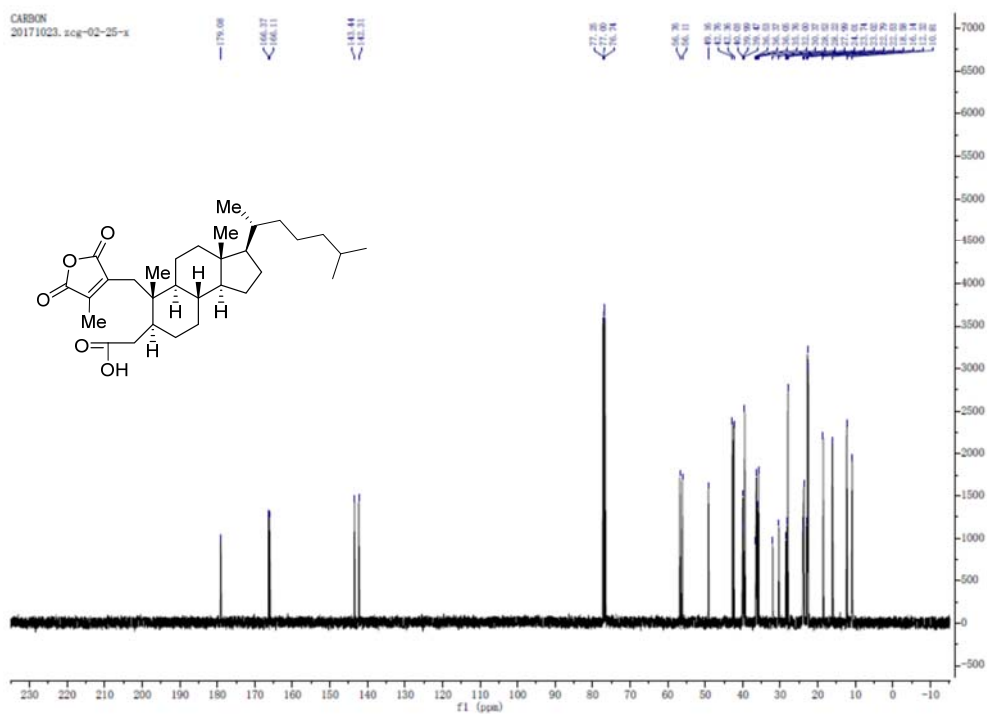

Supplementary Figure 216. <sup>1</sup>H and <sup>13</sup>C spectra of 49b.







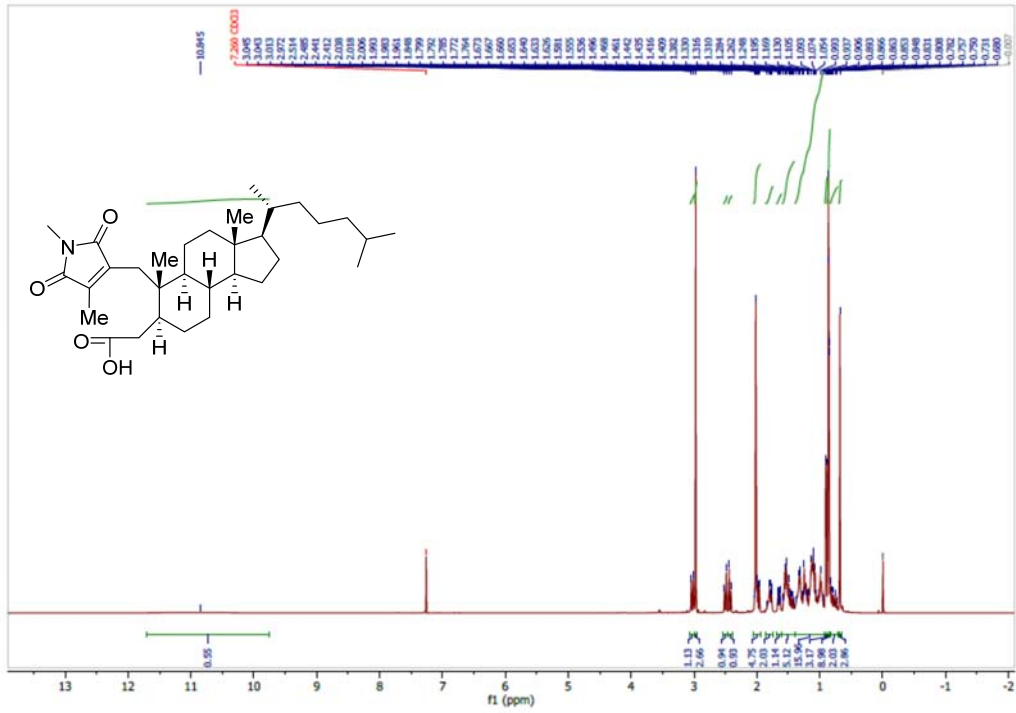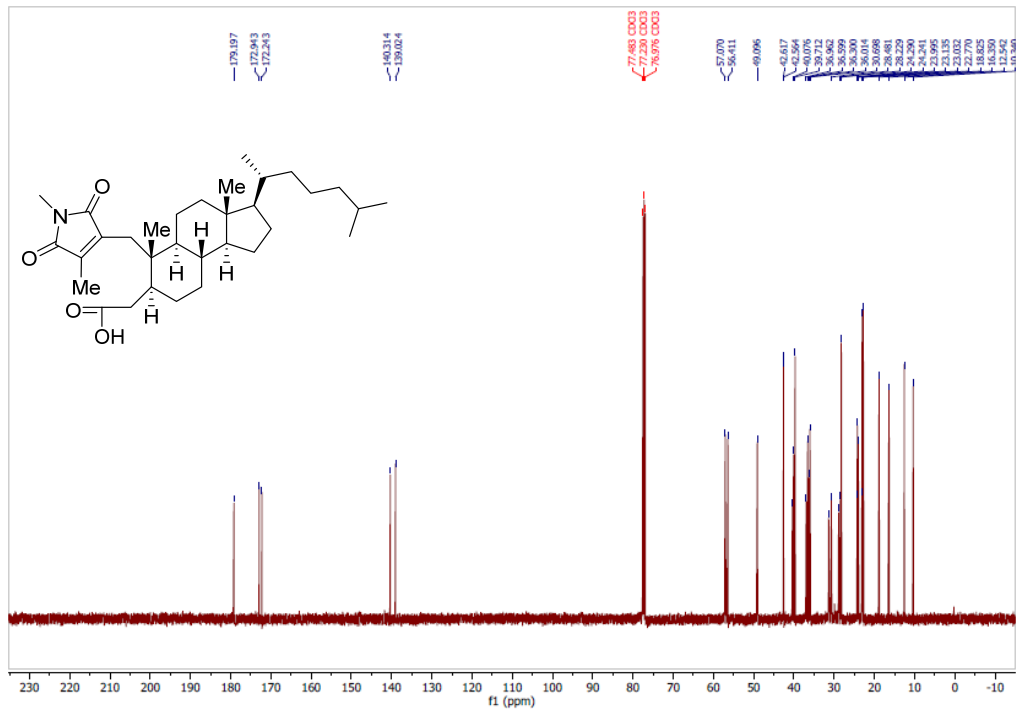

Supplementary Figure 219. <sup>1</sup>H and <sup>13</sup>C spectra of 50c.



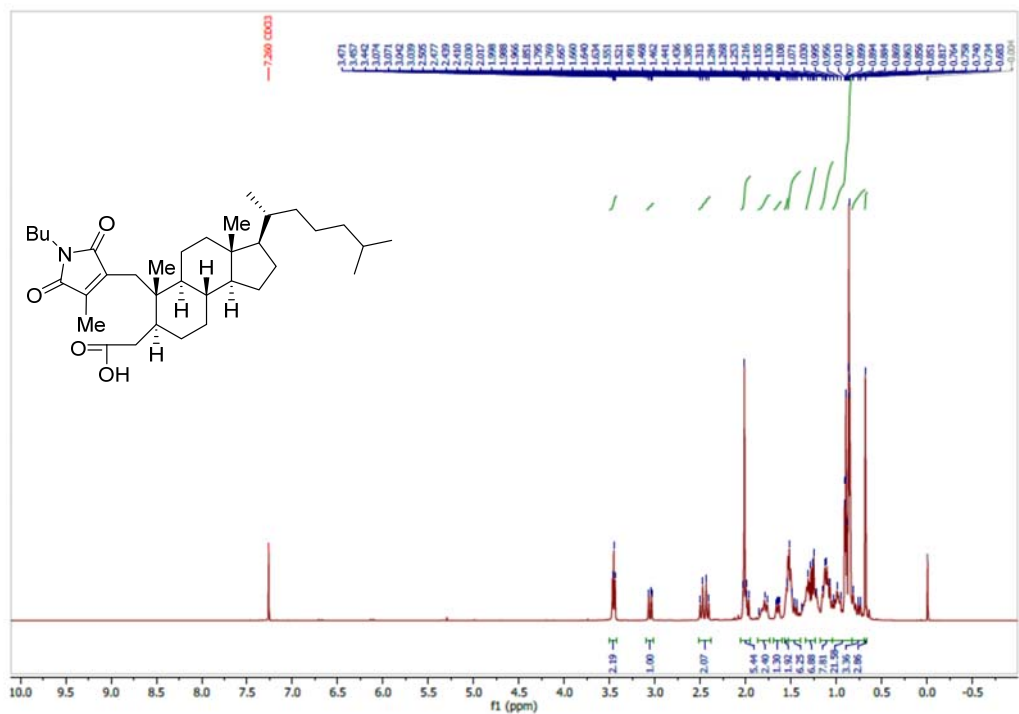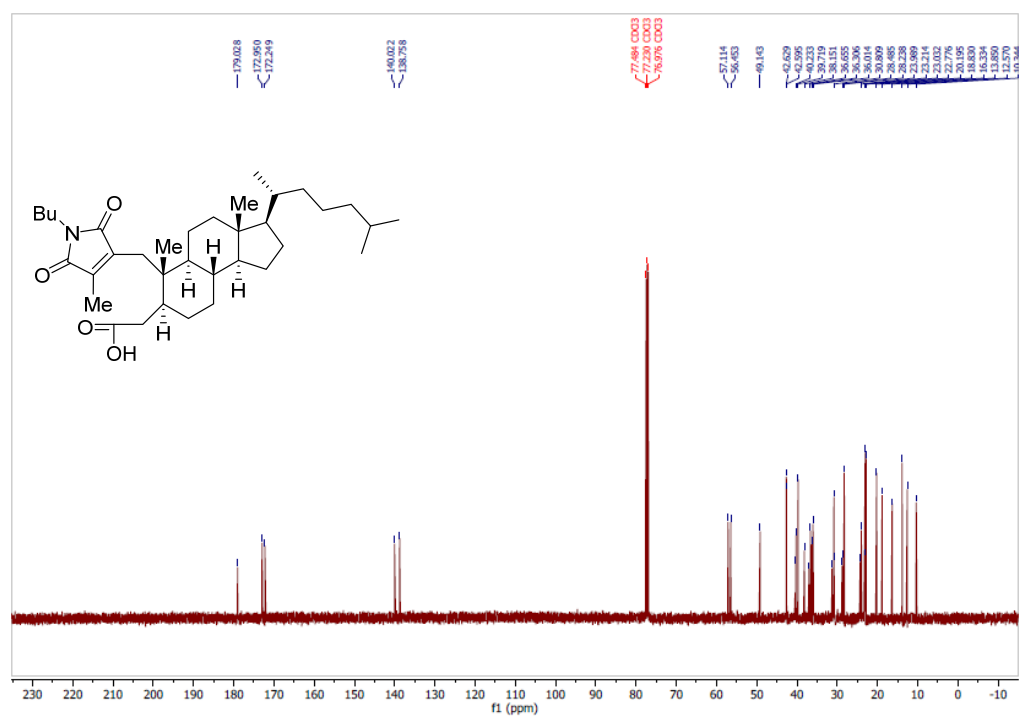

Supplementary Figure 221. <sup>1</sup>H and <sup>13</sup>C spectra of 50e.

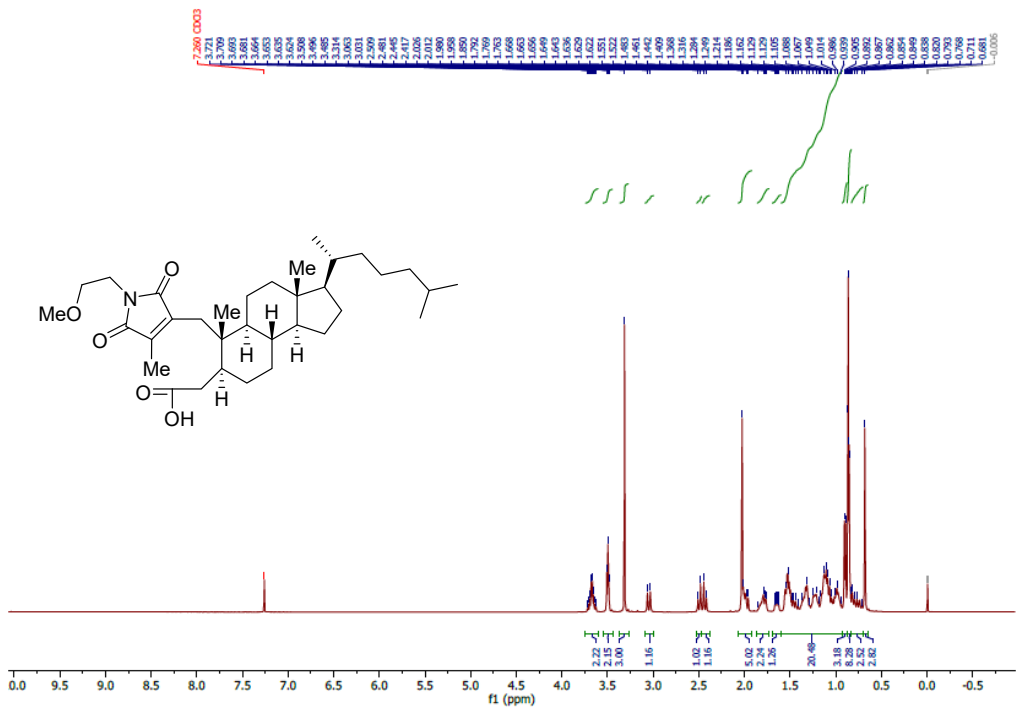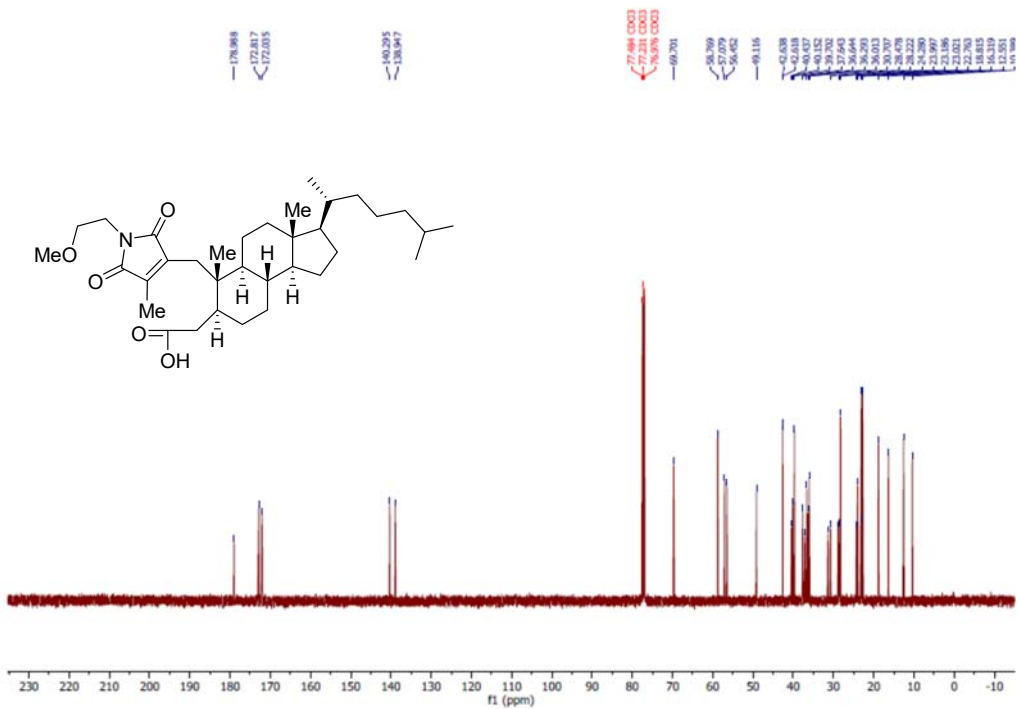

Supplementary Figure 222. <sup>1</sup>H and <sup>13</sup>C spectra of 50f.

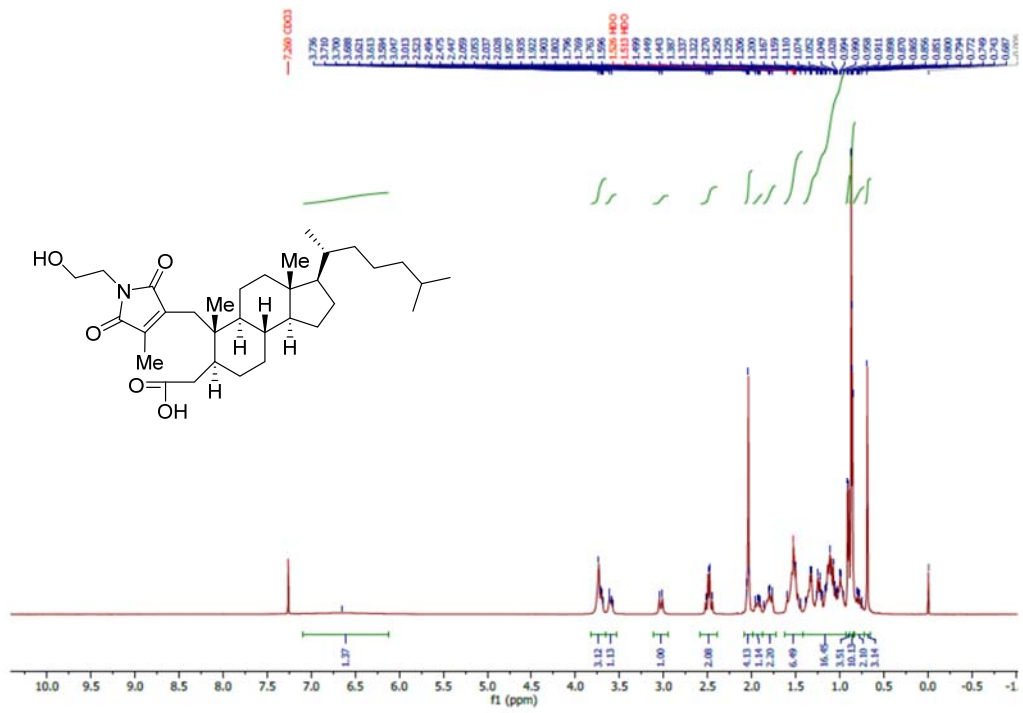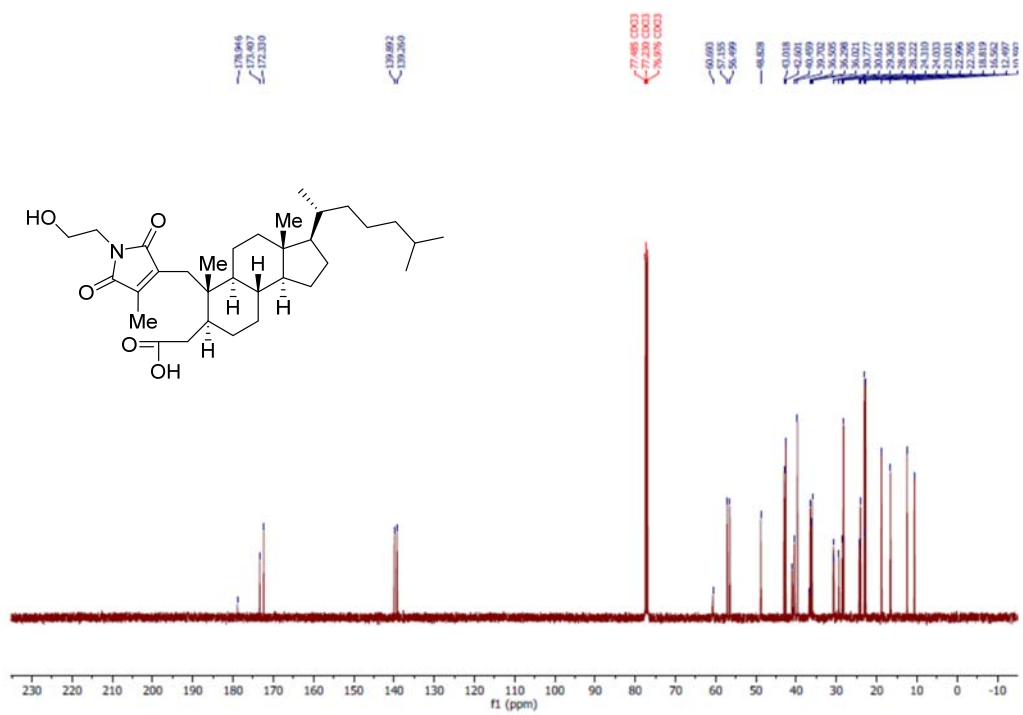

Supplementary Figure 223. <sup>1</sup>H and <sup>13</sup>C spectra of 50g.



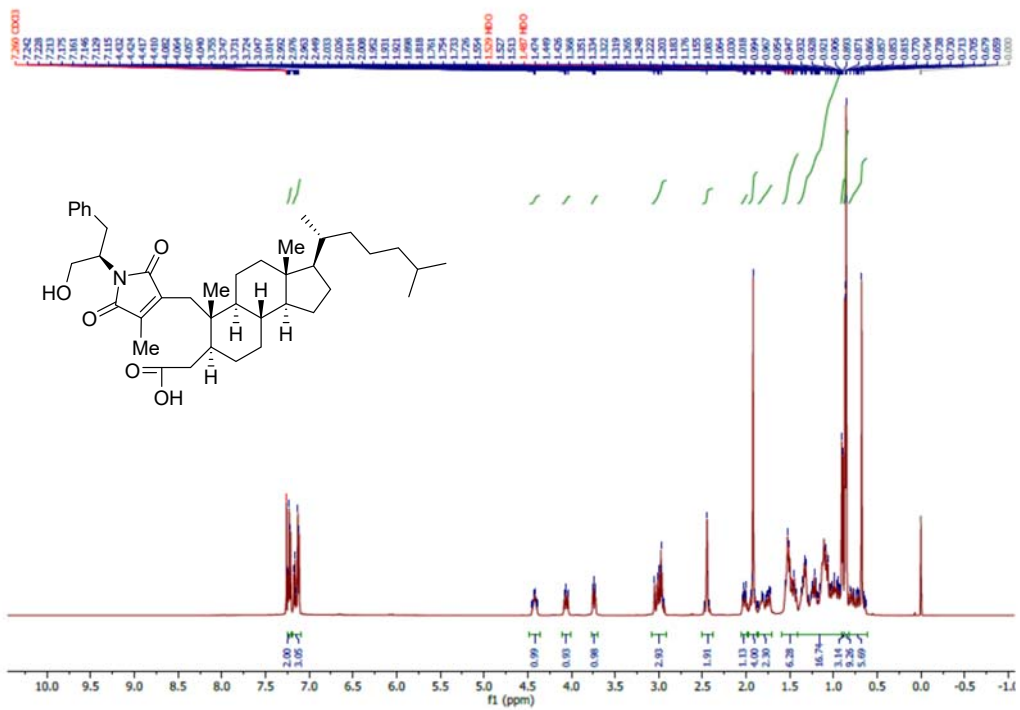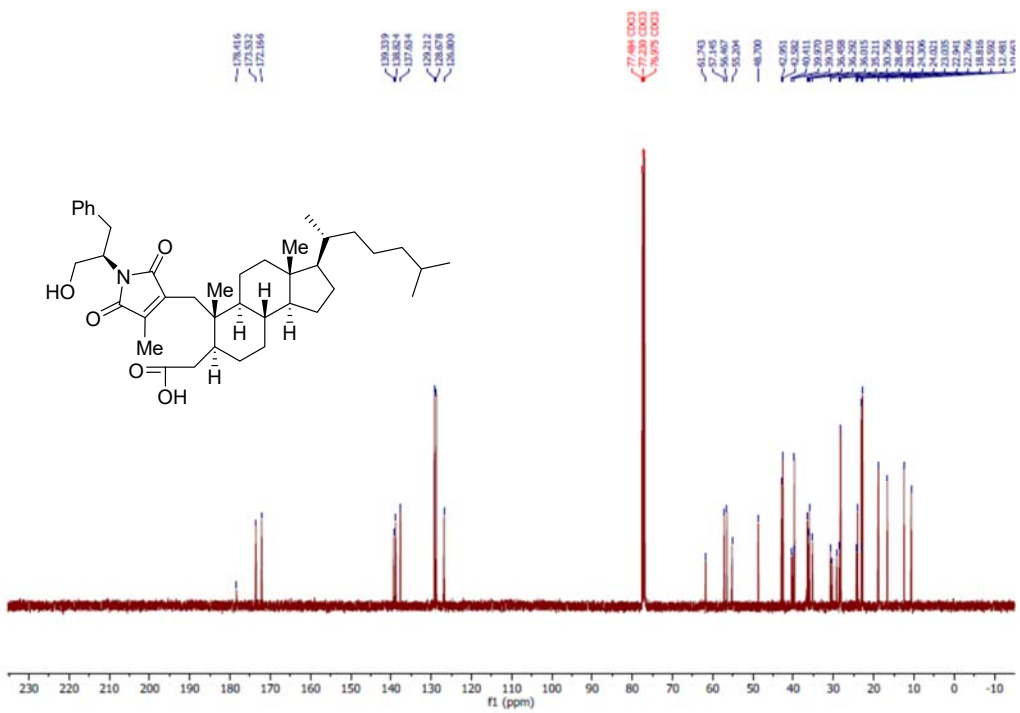

Supplementary Figure 225. <sup>1</sup>H and <sup>13</sup>C spectra of 50i.



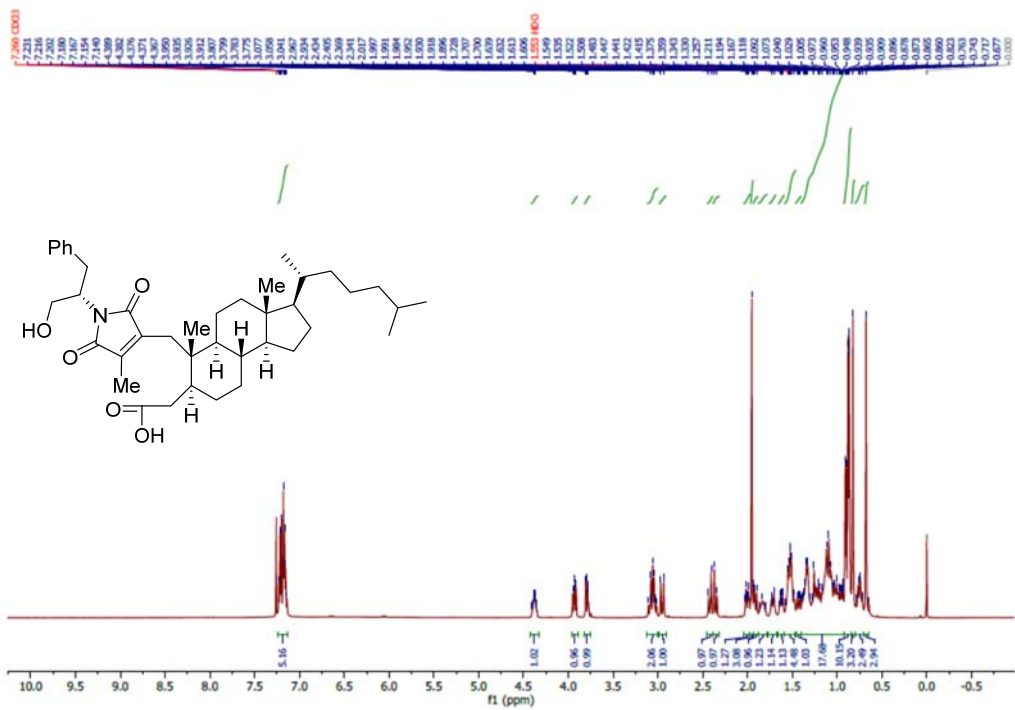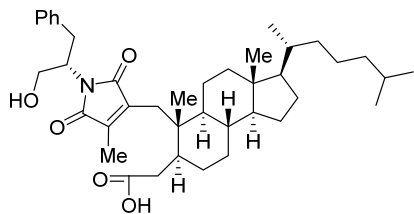

178.851  
173.325  
172.650  
139.037  
138.817  
137.965  
129.301  
128.616  
128.731  
77.894 CDCl3  
77.239 CDCl3  
76.879 CDCl3  
63.197  
57.035  
56.452  
55.614  
-9.084  
-42.716  
-42.599  
-42.582  
-39.215  
-36.533  
-36.312  
-34.941  
-34.873  
-30.761  
-29.944  
-28.234  
-24.301  
-23.715  
-23.038  
-22.775  
-18.656  
-18.509  
-12.507  
TMS

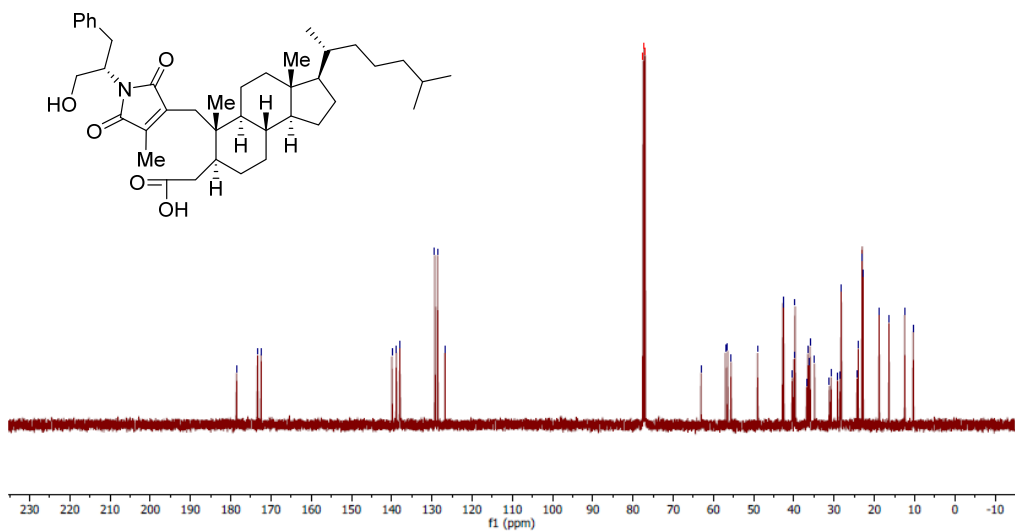

Supplementary Figure 226. <sup>1</sup>H and <sup>13</sup>C spectra of 50j.

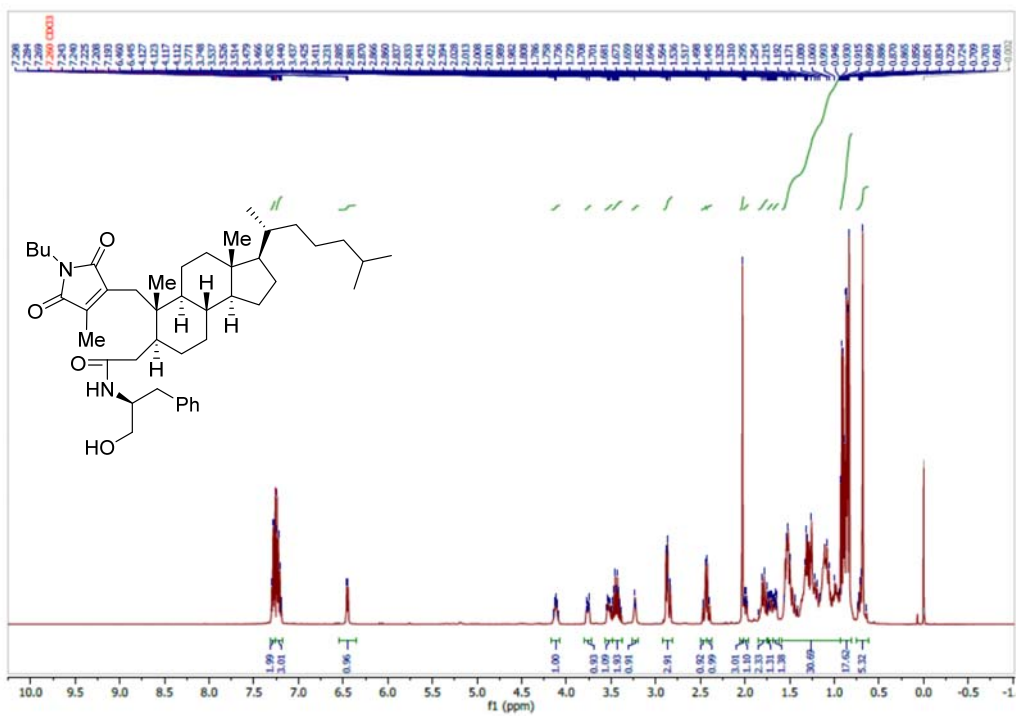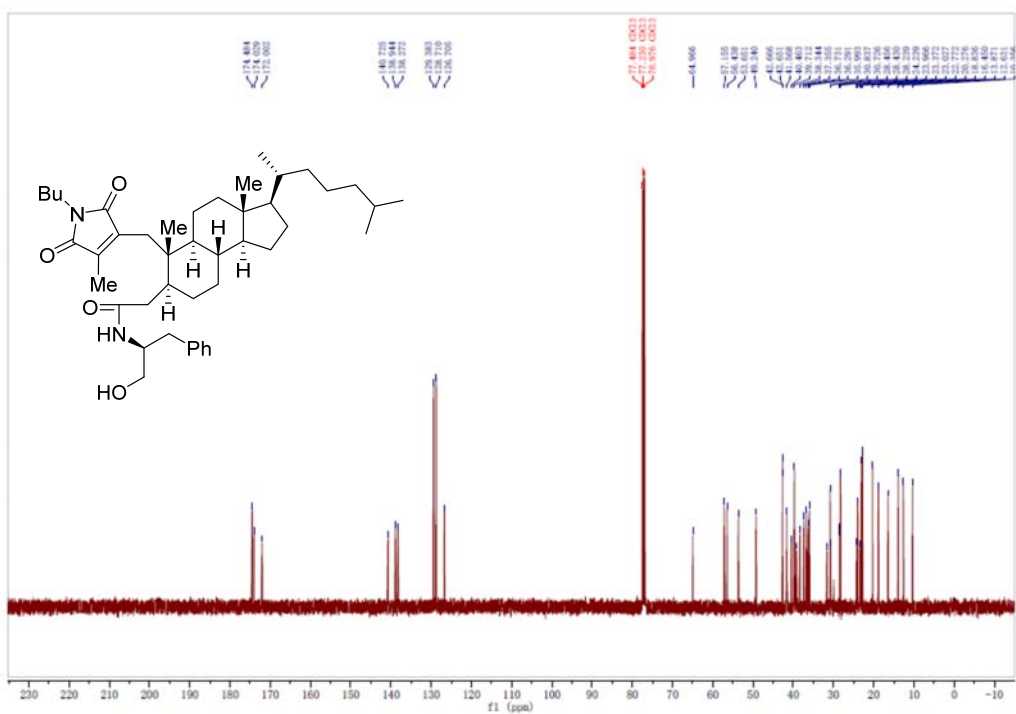

Supplementary Figure 227. <sup>1</sup>H and <sup>13</sup>C spectra of 51a.

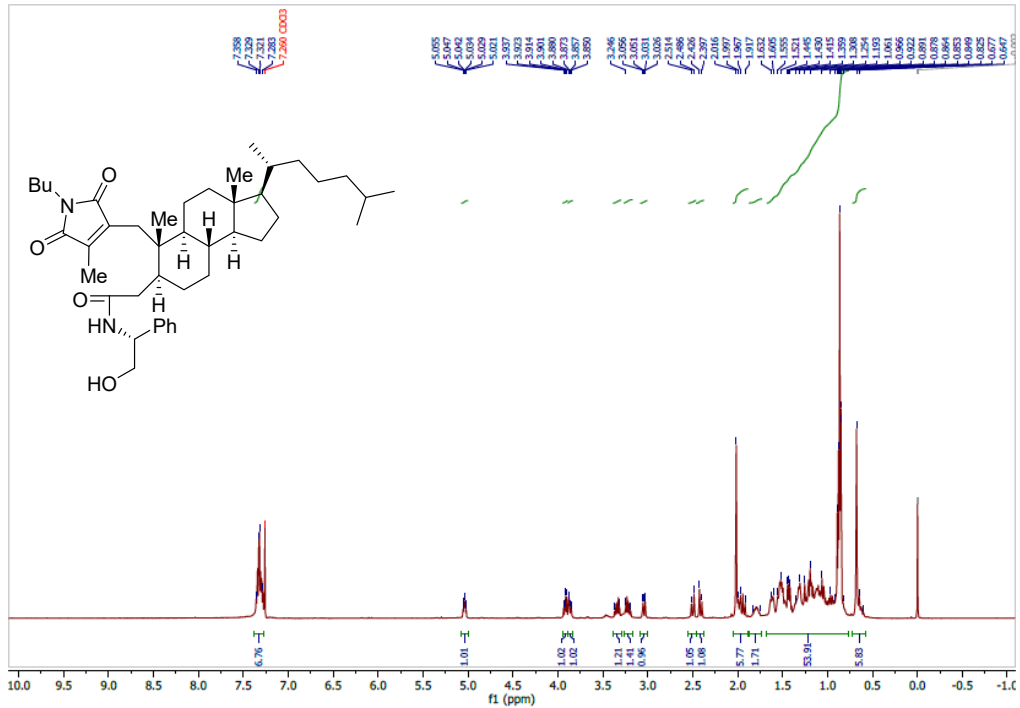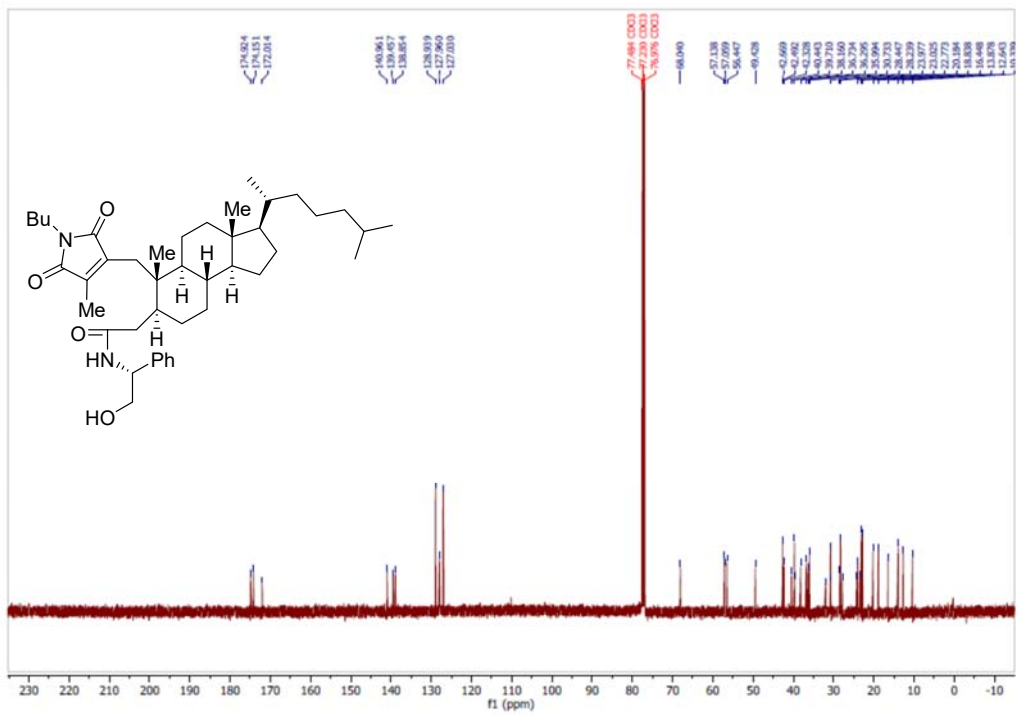

Supplementary Figure 228.  $^1\text{H}$  and  $^{13}\text{C}$  spectra of 51b.

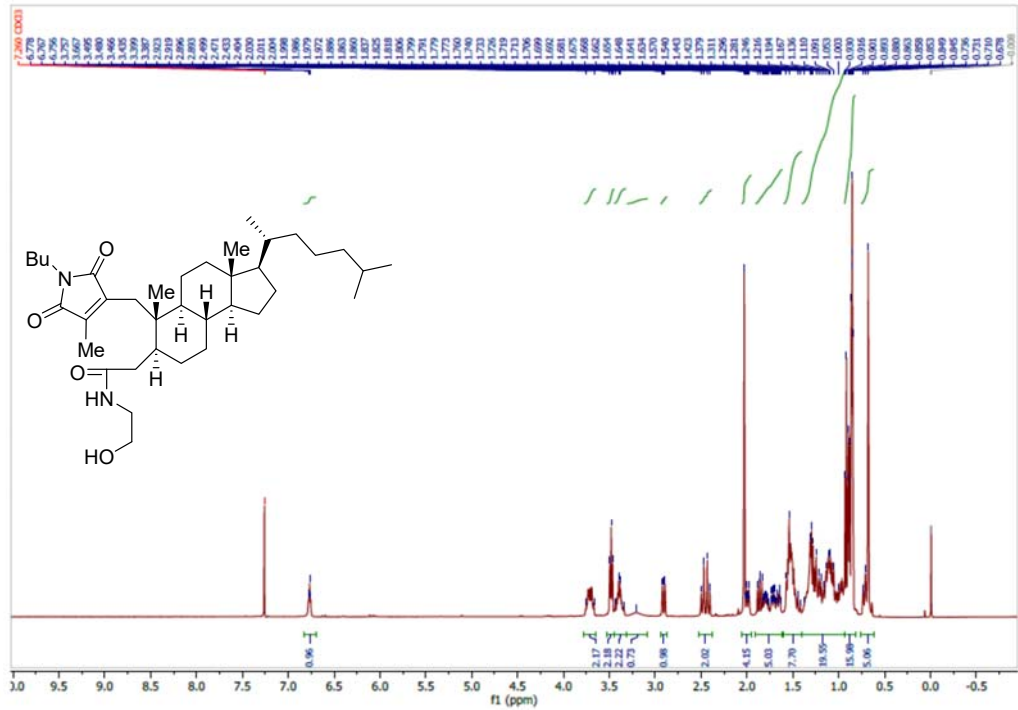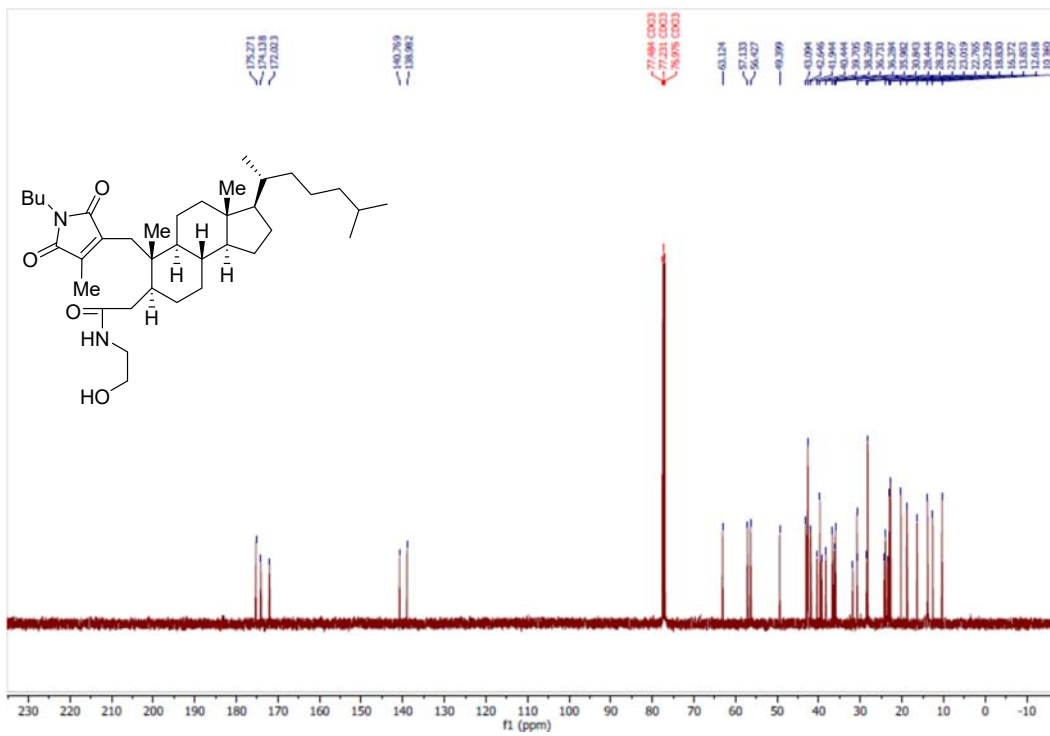

Supplementary Figure 229. <sup>1</sup>H and <sup>13</sup>C spectra of 51c.



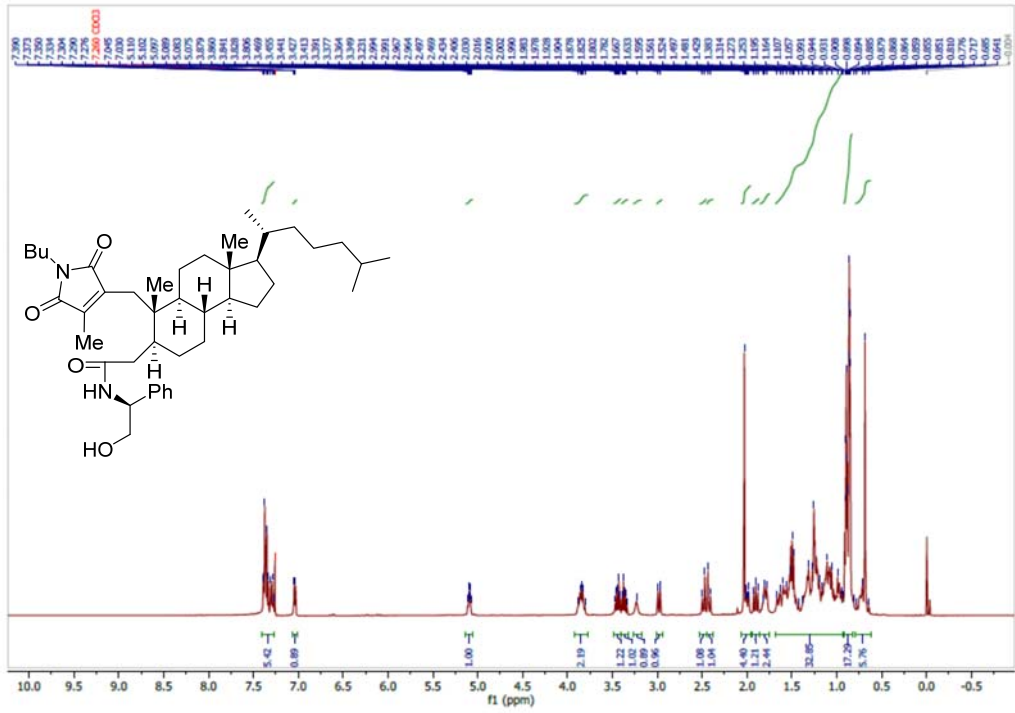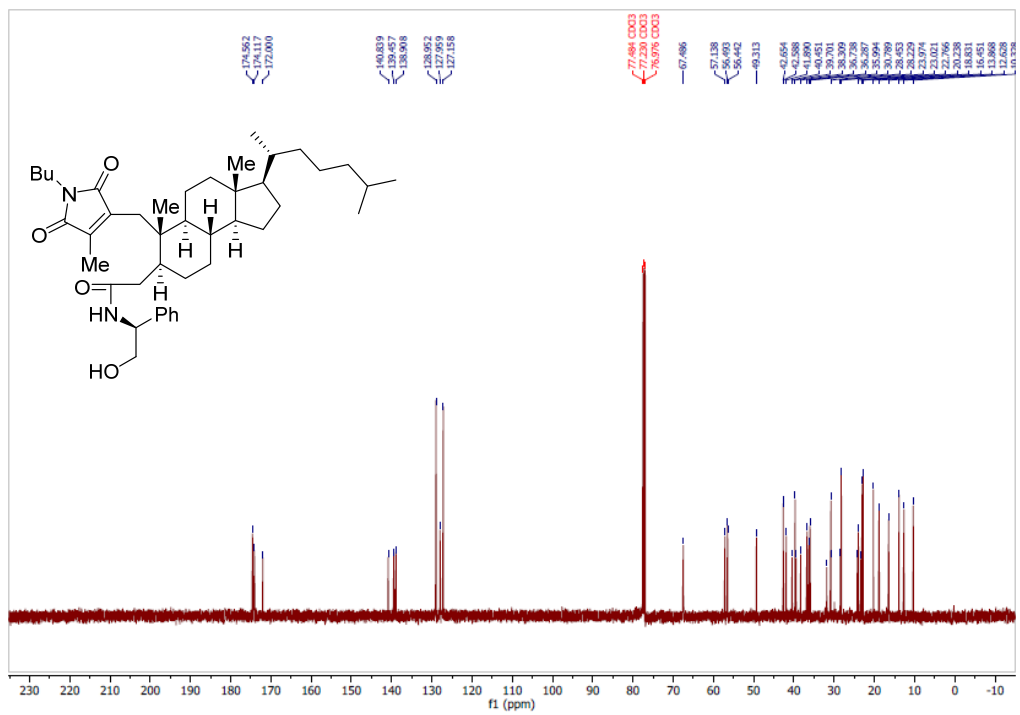

Supplementary Figure 231. <sup>1</sup>H and <sup>13</sup>C spectra of 51e.

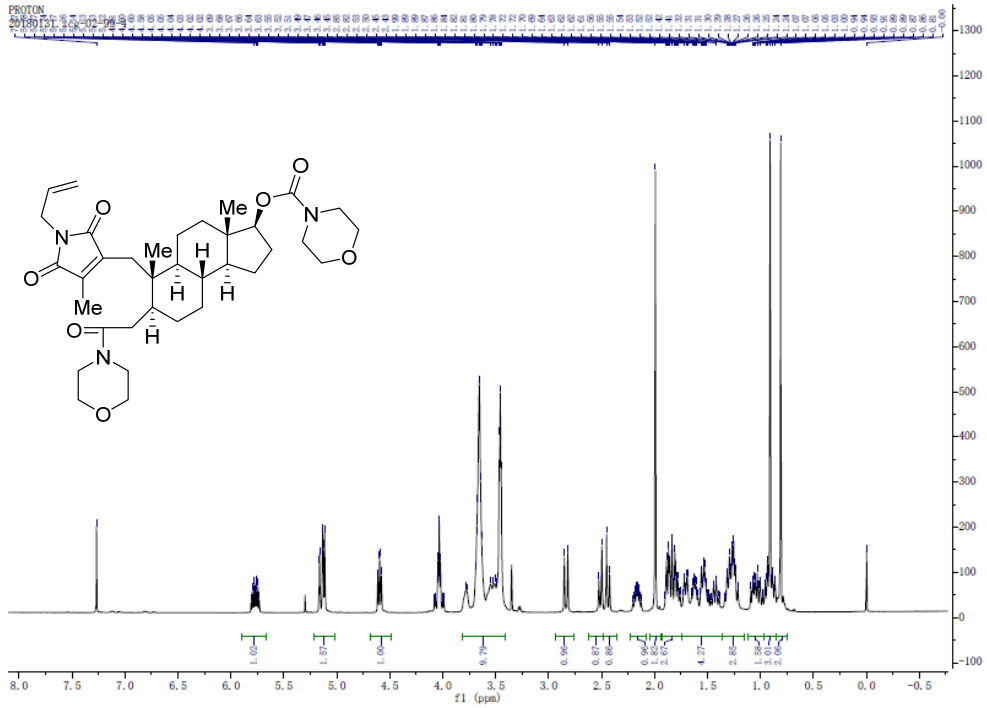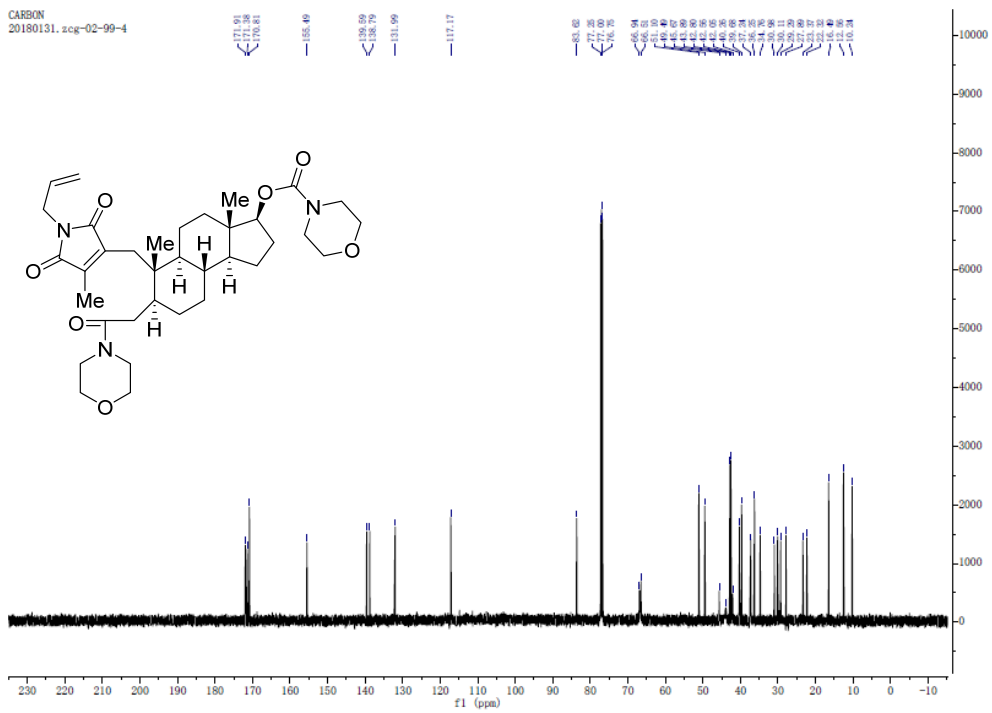

Supplementary Figure 232.  $^1\text{H}$  and  $^{13}\text{C}$  spectra of 53.





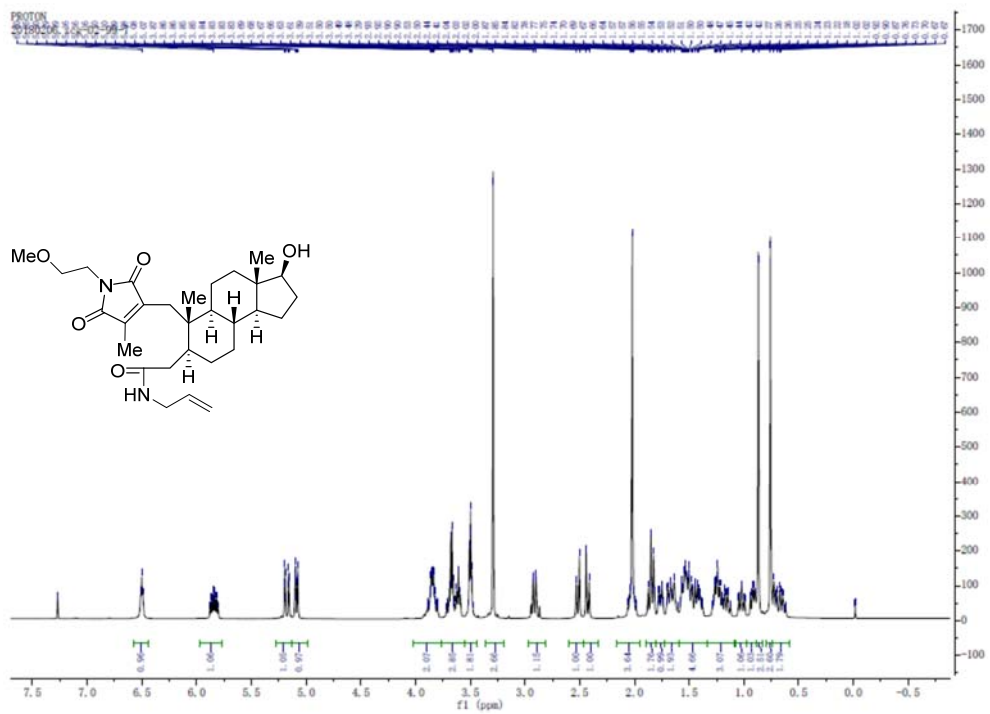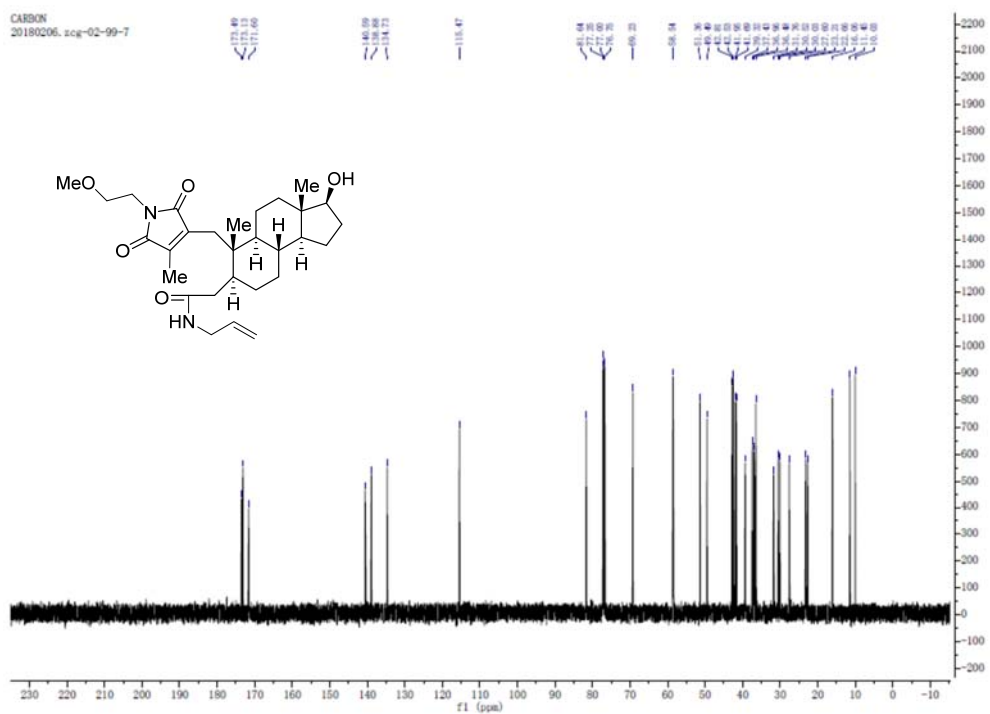

Supplementary Figure 234.  $^1\text{H}$  and  $^{13}\text{C}$  spectra of 52b.

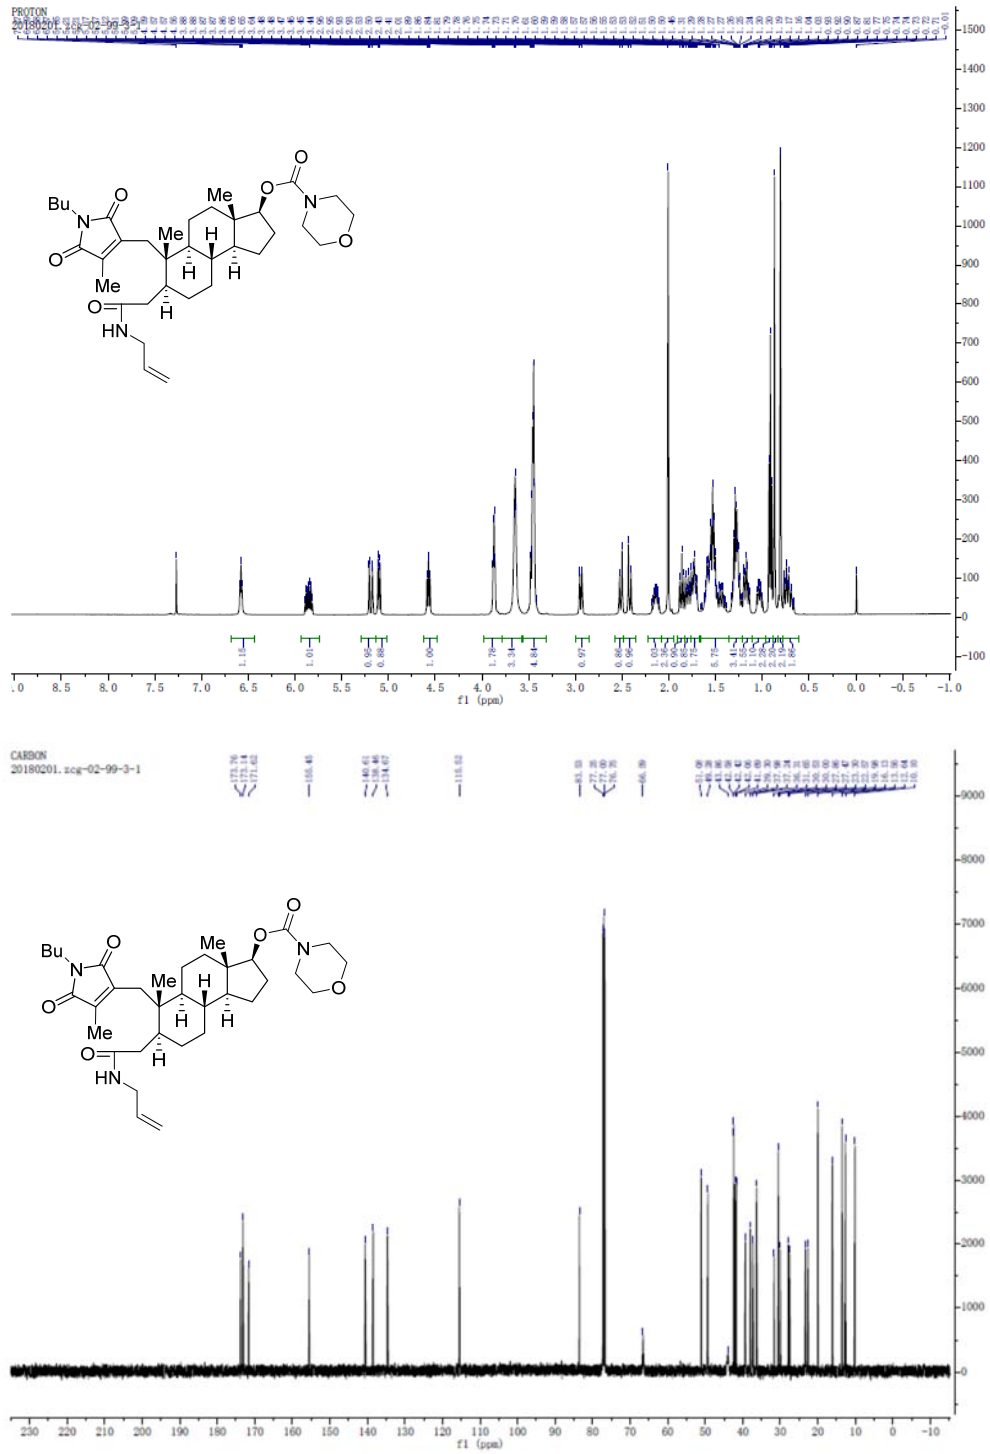

Supplementary Figure 235.  $^1\text{H}$  and  $^{13}\text{C}$  spectra of 54a.

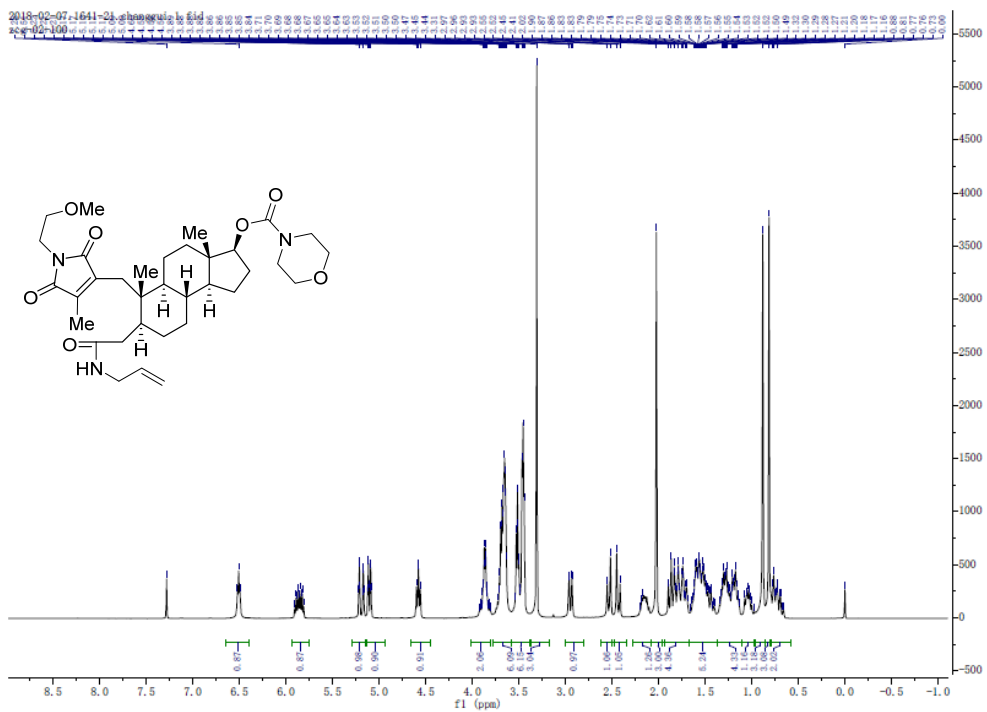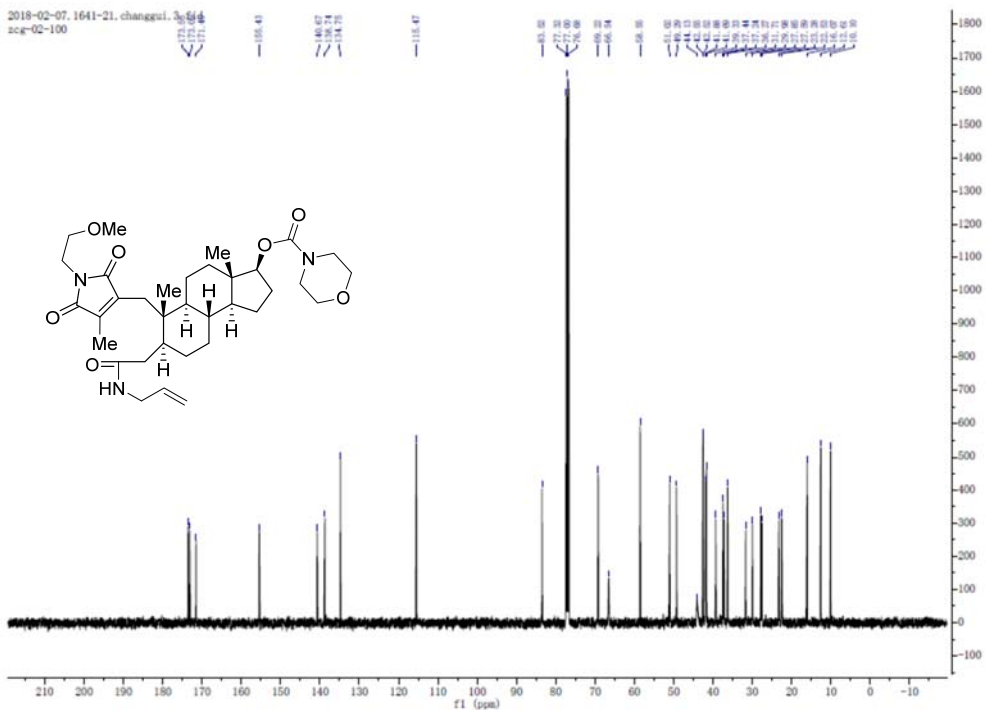

Supplementary Figure 236.  $^1\text{H}$  and  $^{13}\text{C}$  spectra of **54b**.

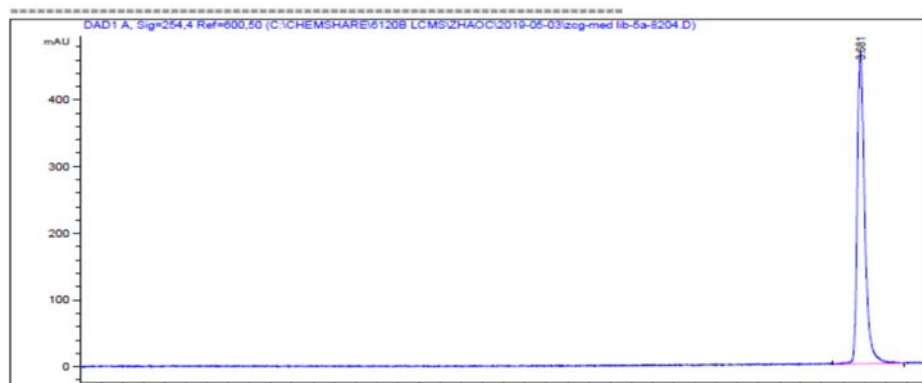

Signal 1: DAD1 A, Sig=254,4 Ref=600,50

| Peak # | RetTime [min] | Type | Width [min] | Area [mAU*s] | Height [mAU] | Area %   |
|--------|---------------|------|-------------|--------------|--------------|----------|
| 1      | 3.681         | BB   | 0.0373      | 1146.51184   | 467.73169    | 100.0000 |

Totals :                    1146.51184  467.73169

**Supplementary Figure 237.** LC-MS spectra of **5a**, MS: (M+Na)<sup>+</sup>, found: 569.2.

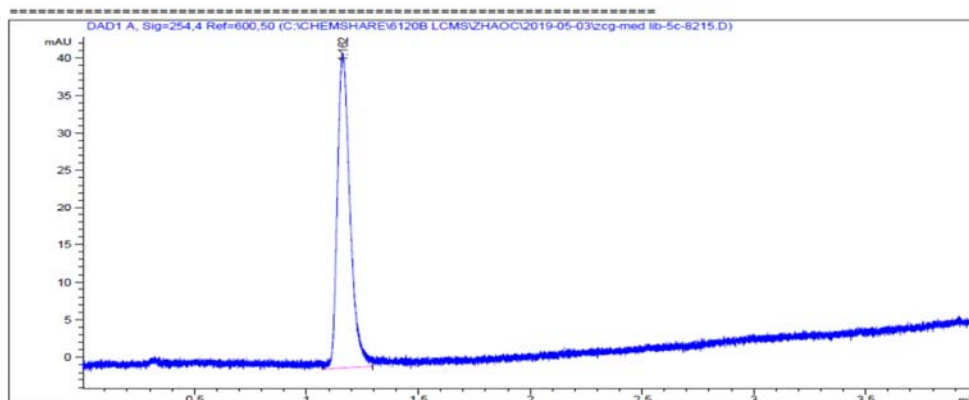

Signal 1: DAD1 A, Sig=254,4 Ref=600,50

| Peak # | RetTime [min] | Type | Width [min] | Area [mAU*s] | Height [mAU] | Area %   |
|--------|---------------|------|-------------|--------------|--------------|----------|
| 1      | 1.162         | BB   | 0.0577      | 165.32951    | 41.85899     | 100.0000 |

Totals :                    165.32951  41.85899

**Supplementary Figure 238.** LC-MS spectra of **5c**, MS: (M+Na)<sup>+</sup>, found: 641.3.

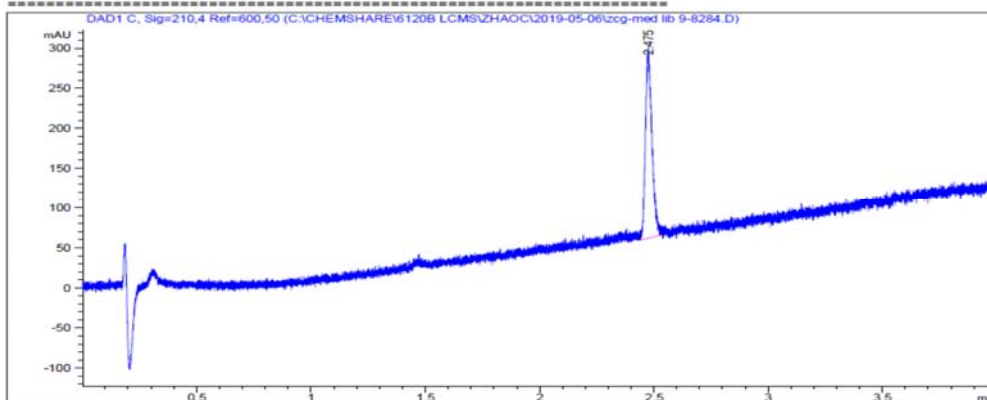

Signal 1: DAD1 C, Sig=210,4 Ref=600,50

| Peak # | RetTime [min] | Type | Width [min] | Area [mAU*s] | Height [mAU] | Area %   |
|--------|---------------|------|-------------|--------------|--------------|----------|
| 1      | 2.475         | BB   | 0.0314      | 474.60620    | 226.86649    | 100.0000 |

Totals : 474.60620 226.86649

Supplementary Figure 239. LC-MS spectra of **9**, MS: (M+H)<sup>+</sup>, found: 362.2.

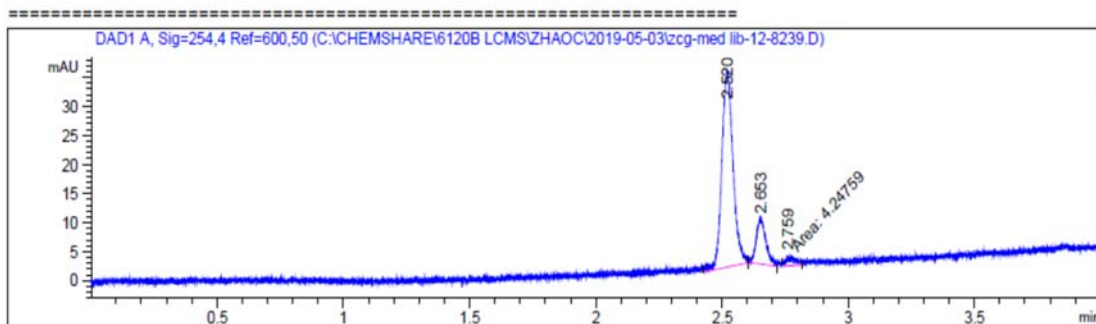

Signal 1: DAD1 A, Sig=254,4 Ref=600,50

| Peak # | RetTime [min] | Type | Width [min] | Area [mAU*s] | Height [mAU] | Area %  |
|--------|---------------|------|-------------|--------------|--------------|---------|
| 1      | 2.520         | BB   | 0.0459      | 104.70833    | 33.76105     | 80.4985 |
| 2      | 2.653         | BB   | 0.0338      | 21.11897     | 7.83874      | 16.2360 |
| 3      | 2.759         | MM   | 0.0381      | 4.24759      | 1.85686      | 3.2655  |

Totals : 130.07489 43.45665

Supplementary Figure 240. LC-MS spectra of **12**, MS: (M+H)<sup>+</sup>, found: 428.1.

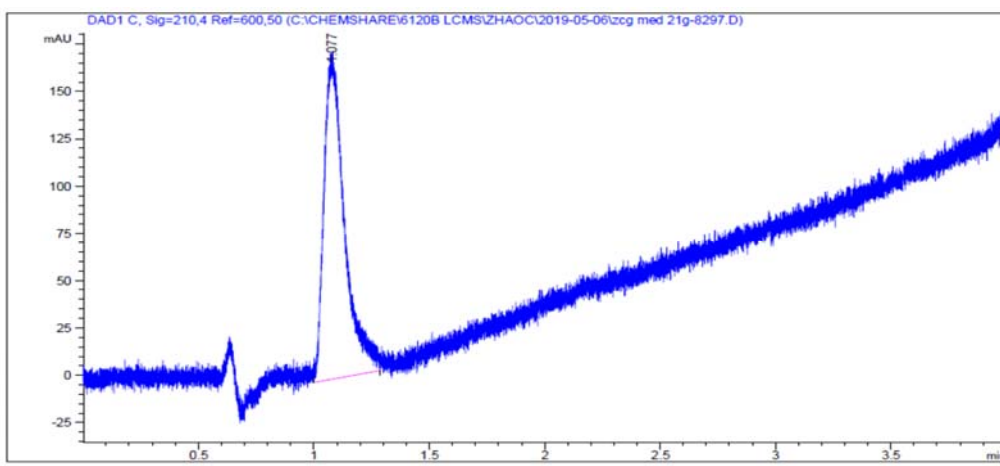

Signal 1: DAD1 C, Sig=210,4 Ref=600,50

| Peak # | RetTime [min] | Type | Width [min] | Area [mAU*s] | Height [mAU] | Area %   |
|--------|---------------|------|-------------|--------------|--------------|----------|
| 1      | 1.077         | BB   | 0.0760      | 1057.09326   | 165.84901    | 100.0000 |

Totals : 1057.09326 165.84901

Supplementary Figure 241. LC-MS spectra of 21g, MS: (M+H)<sup>+</sup>, found: 320.1.

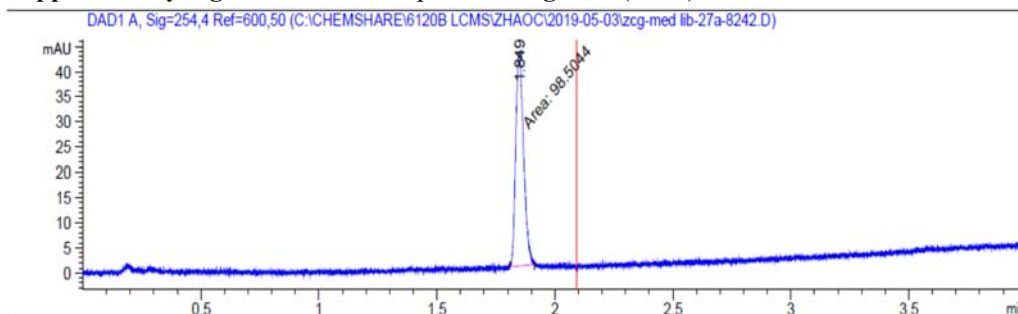

Signal 1: DAD1 A, Sig=254,4 Ref=600,50

| Peak # | RetTime [min] | Type | Width [min] | Area [mAU*s] | Height [mAU] | Area %   |
|--------|---------------|------|-------------|--------------|--------------|----------|
| 1      | 1.849         | MM   | 0.0389      | 98.50439     | 42.23854     | 100.0000 |

Totals : 98.50439 42.23854

Supplementary Figure 242. LC-MS spectra of 27a, MS: (M+H)<sup>+</sup>, found: 358.1.

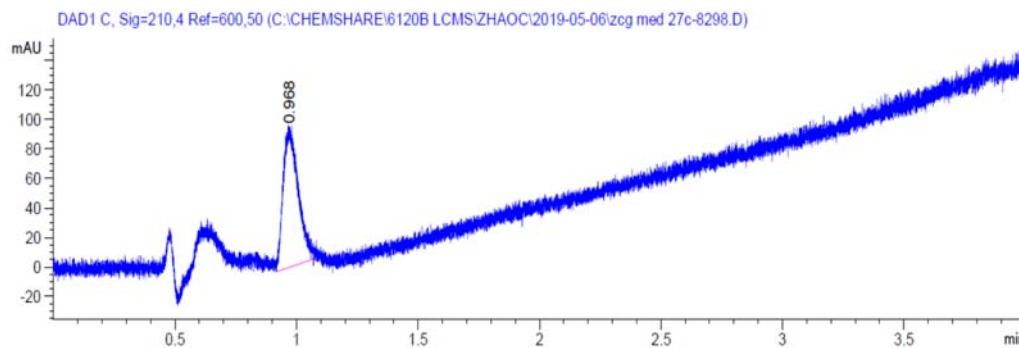

| Peak # | RetTime [min] | Type | Width [min] | Area [mAU*s] | Height [mAU] | Area %   |
|--------|---------------|------|-------------|--------------|--------------|----------|
| 1      | 0.968         | BB   | 0.0522      | 410.53693    | 94.15156     | 100.0000 |

Totals : 410.53693 94.15156

Supplementary Figure 243. LC-MS spectra of 27c, MS: (M+H)<sup>+</sup>, found: 318.1.

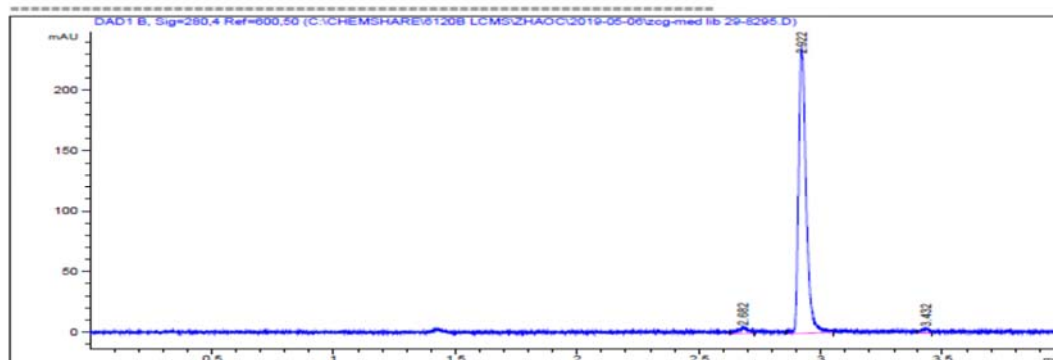

Signal 1: DAD1 B, Sig=280,4 Ref=600,50

| Peak # | RetTime [min] | Type | Width [min] | Area [mAU*s] | Height [mAU] | Area %  |
|--------|---------------|------|-------------|--------------|--------------|---------|
| 1      | 2.682         | BB   | 0.0395      | 16.22314     | 4.87850      | 3.0278  |
| 2      | 2.922         | BB   | 0.0332      | 511.30566    | 236.34161    | 95.4272 |
| 3      | 3.432         | BB   | 0.0298      | 8.27852      | 3.60452      | 1.5451  |

Totals : 535.80732 244.82463

Supplementary Figure 245. LC-MS spectra of 29, MS: (M+H)<sup>+</sup>, found: 316.1.

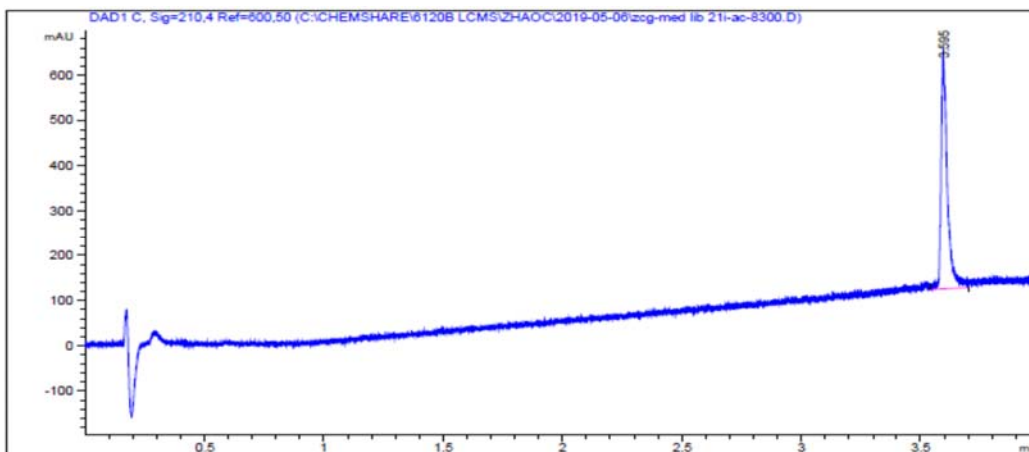

Signal 1: DAD1 C, Sig=210,4 Ref=600,50

| Peak # | RetTime [min] | Type | Width [min] | Area [mAU*s] | Height [mAU] | Area %   |
|--------|---------------|------|-------------|--------------|--------------|----------|
| 1      | 3.595         | BB   | 0.0273      | 950.97528    | 512.08533    | 100.0000 |

Totals : 950.97528 512.08533

Supplementary Figure 246. LC-MS spectra of **41bb**, MS: (M+H)<sup>+</sup>, found: 460.3.

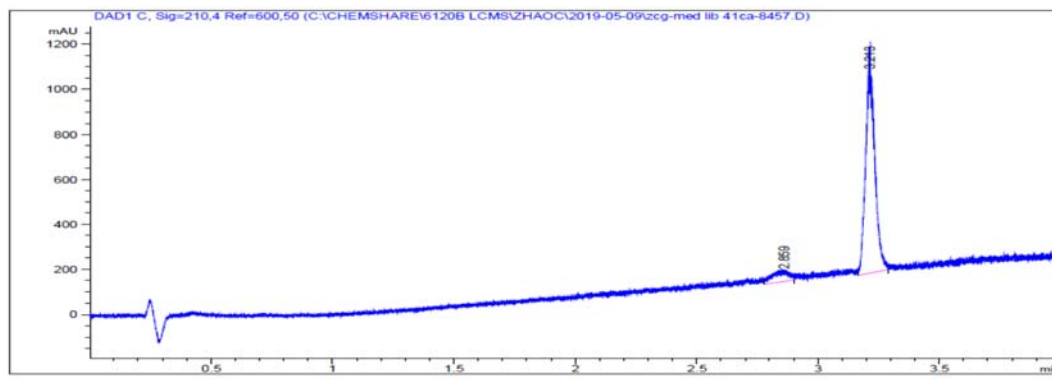

Signal 1: DAD1 C, Sig=210,4 Ref=600,50

| Peak # | RetTime [min] | Type | Width [min] | Area [mAU*s] | Height [mAU] | Area %  |
|--------|---------------|------|-------------|--------------|--------------|---------|
| 1      | 2.859         | BB   | 0.0635      | 238.23796    | 44.25521     | 8.8085  |
| 2      | 3.213         | BB   | 0.0352      | 2466.40503   | 893.97723    | 91.1915 |

Totals : 2704.64299 938.23244

Supplementary Figure 247. LC-MS spectra of **41ca**, MS: (M+H)<sup>+</sup>, found: 559.2.



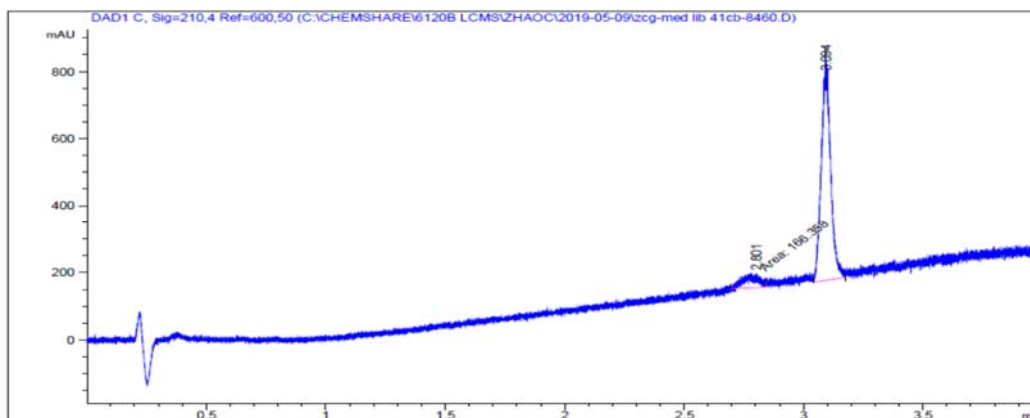

Signal 1: DAD1 C, Sig=210,4 Ref=600,50

| Peak # | RetTime [min] | Type | Width [min] | Area [mAU*s] | Height [mAU] | Area %  |
|--------|---------------|------|-------------|--------------|--------------|---------|
| 1      | 2.801         | MM   | 0.0637      | 166.35771    | 43.49775     | 8.6168  |
| 2      | 3.094         | BB   | 0.0383      | 1764.27161   | 617.72681    | 91.3832 |

Totals : 1930.62932 661.22456

Supplementary Figure 248. LC-MS spectra of **41cb**, MS: (M+H)<sup>+</sup>, found: 573.2.

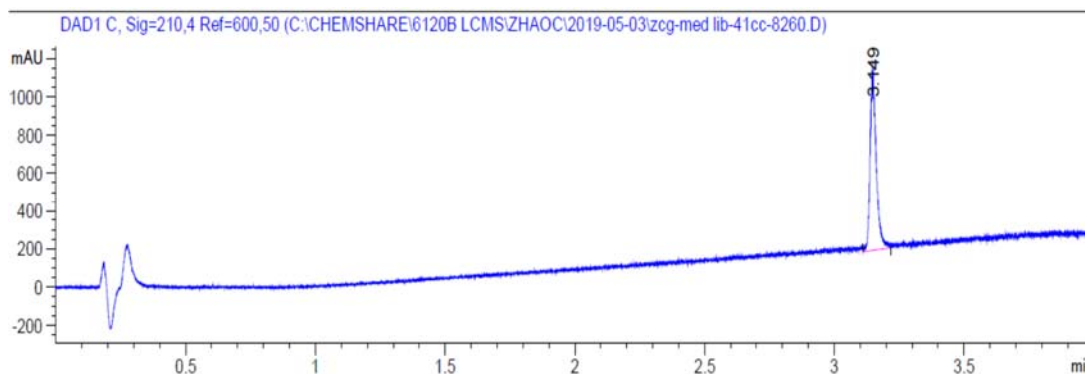

Signal 3: DAD1 C, Sig=210,4 Ref=600,50

| Peak # | RetTime [min] | Type | Width [min] | Area [mAU*s] | Height [mAU] | Area %   |
|--------|---------------|------|-------------|--------------|--------------|----------|
| 1      | 3.149         | BB   | 0.0263      | 1550.32410   | 892.52545    | 100.0000 |

Totals : 1550.32410 892.52545

Supplementary Figure 249. LC-MS spectra of **41cc**, MS: (M+H)<sup>+</sup>, found: 573.2.

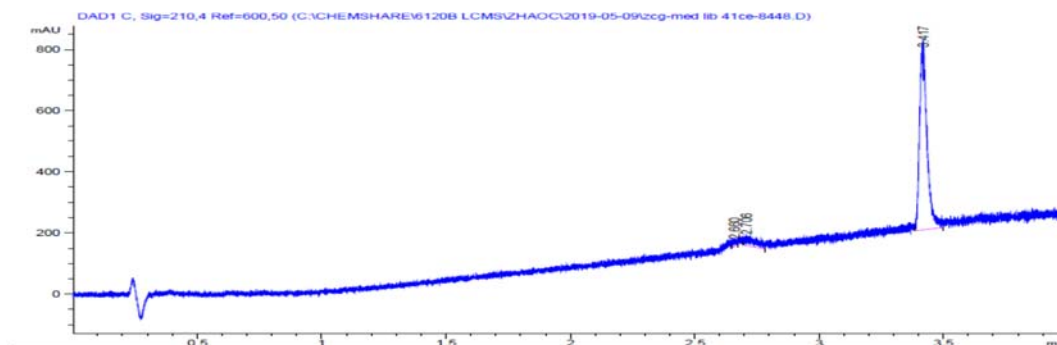

Signal 1: DAD1 C, Sig=210,4 Ref=600,50

| Peak # | RetTime [min] | Type | Width [min] | Area [mAU*s] | Height [mAU] | Area %  |
|--------|---------------|------|-------------|--------------|--------------|---------|
| 1      | 2.660         | BB   | 0.0164      | 21.96706     | 17.06423     | 1.6025  |
| 2      | 2.706         | BB   | 0.0364      | 88.19725     | 29.34437     | 6.4338  |
| 3      | 3.417         | BB   | 0.0299      | 1260.67590   | 591.05695    | 91.9637 |

Totals : 1370.84022 637.46554

Supplementary Figure 250. LC-MS spectra of 41ce, MS: (M+H)<sup>+</sup>, found: 557.2.

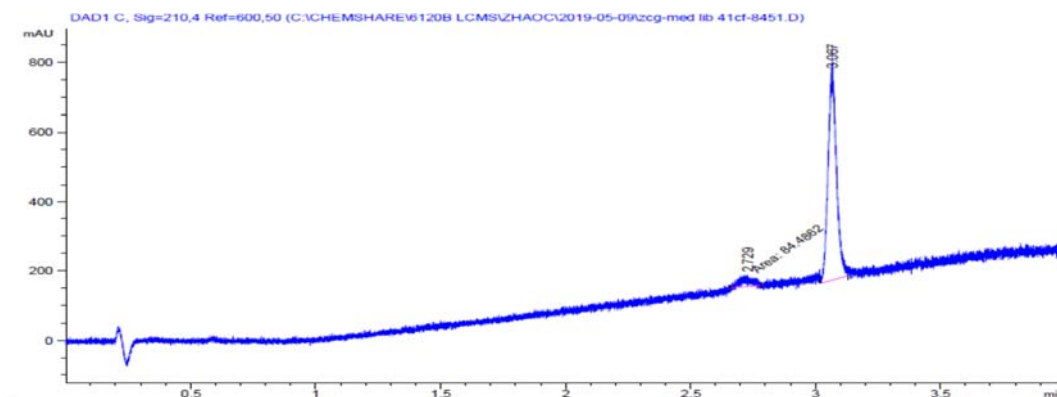

Signal 1: DAD1 C, Sig=210,4 Ref=600,50

| Peak # | RetTime [min] | Type | Width [min] | Area [mAU*s] | Height [mAU] | Area %  |
|--------|---------------|------|-------------|--------------|--------------|---------|
| 1      | 2.729         | MM   | 0.0460      | 84.48620     | 33.42954     | 5.5783  |
| 2      | 3.067         | BB   | 0.0330      | 1430.05762   | 602.83209    | 94.4217 |

Totals : 1514.54382 636.26163

Supplementary Figure 251. LC-MS spectra of 41cf, MS: (M+H)<sup>+</sup>, found: 529.3.

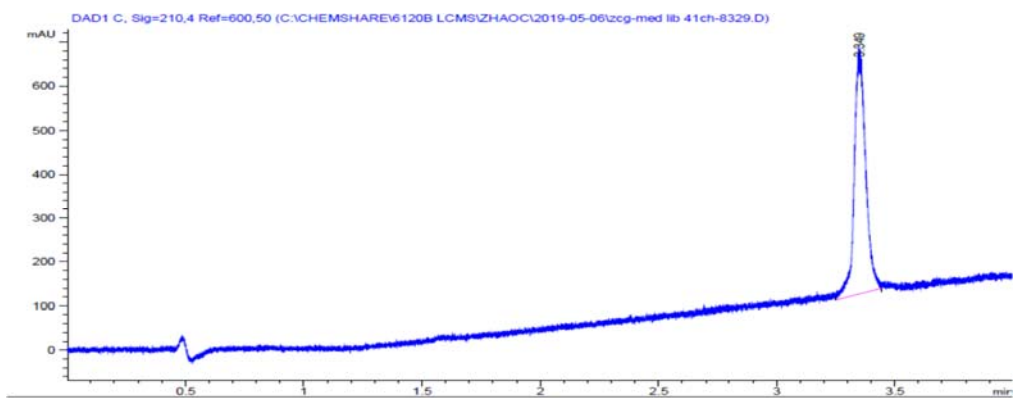

Signal 1: DAD1 C, Sig=210,4 Ref=600,50

| Peak # | RetTime [min] | Type | Width [min] | Area [mAU*s] | Height [mAU] | Area %   |
|--------|---------------|------|-------------|--------------|--------------|----------|
| 1      | 3.349         | BB   | 0.0471      | 1861.49243   | 532.77356    | 100.0000 |

Totals : 1861.49243 532.77356

Supplementary Figure 252. LC-MS spectra of **41ch**, MS: (M+H)<sup>+</sup>, found: 593.3.

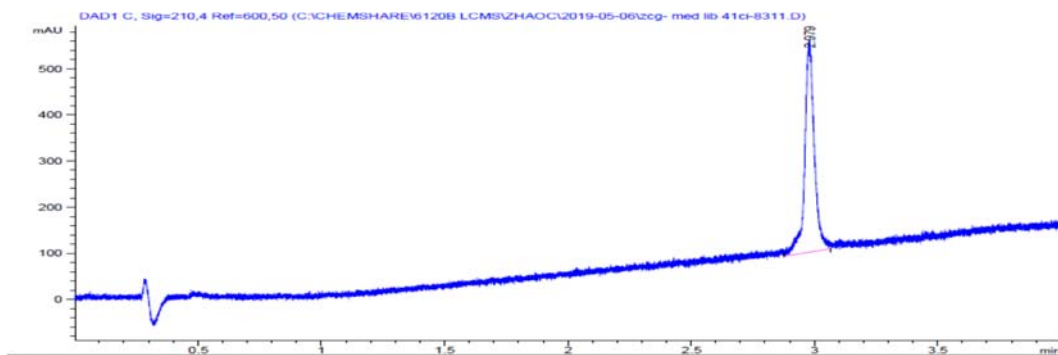

Signal 1: DAD1 C, Sig=210,4 Ref=600,50

| Peak # | RetTime [min] | Type | Width [min] | Area [mAU*s] | Height [mAU] | Area %   |
|--------|---------------|------|-------------|--------------|--------------|----------|
| 1      | 2.979         | BB   | 0.0408      | 1235.28418   | 439.42145    | 100.0000 |

Totals : 1235.28418 439.42145

Supplementary Figure 253. LC-MS spectra of **41ci**, MS: (M+H)<sup>+</sup>, found: 533.2.

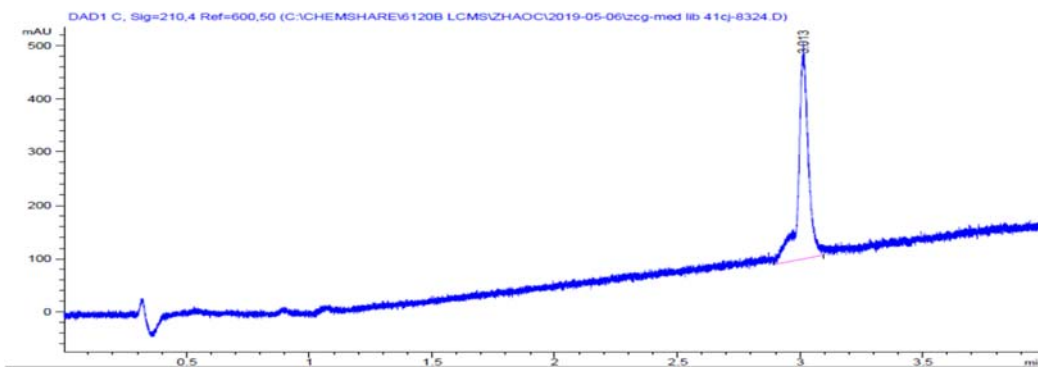

Signal 1: DAD1 C, Sig=210,4 Ref=600,50

| Peak # | RetTime [min] | Type | Width [min] | Area [mAU*s] | Height [mAU] | Area %   |
|--------|---------------|------|-------------|--------------|--------------|----------|
| 1      | 3.013         | BB   | 0.0419      | 1139.68005   | 380.77518    | 100.0000 |

Totals : 1139.68005 380.77518

Supplementary Figure 254. LC-MS spectra of 41cj, MS: (M+H)<sup>+</sup>, found: 547.2.

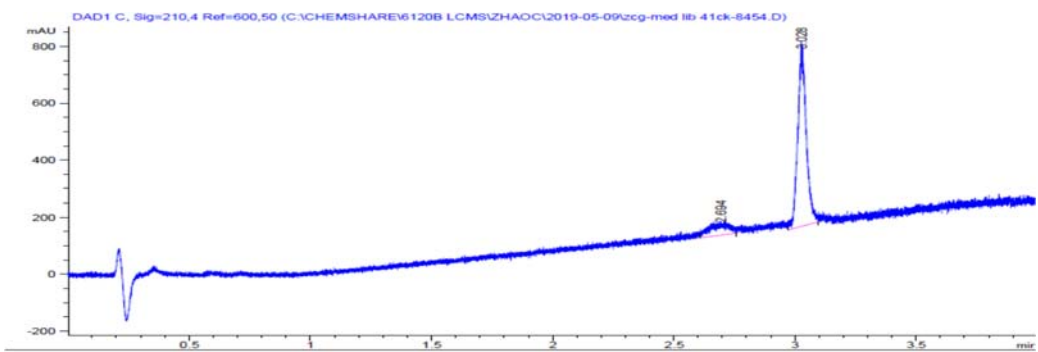

Signal 1: DAD1 C, Sig=210,4 Ref=600,50

| Peak # | RetTime [min] | Type | Width [min] | Area [mAU*s] | Height [mAU] | Area %  |
|--------|---------------|------|-------------|--------------|--------------|---------|
| 1      | 2.694         | BB   | 0.0752      | 231.61143    | 37.62191     | 13.0843 |
| 2      | 3.028         | BB   | 0.0316      | 1538.53955   | 613.79236    | 86.9157 |

Totals : 1770.15099 651.41427

Supplementary Figure 255. LC-MS spectra of 41ck, MS: (M+H)<sup>+</sup>, found: 573.2.

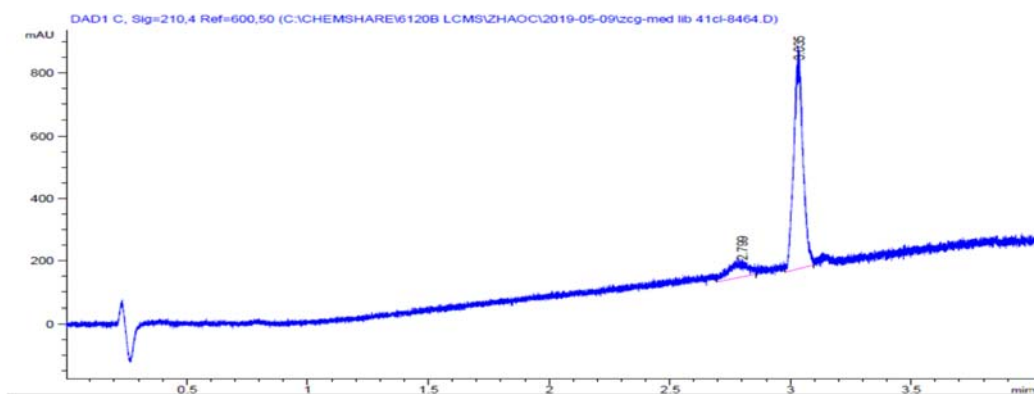

Signal 1: DAD1 C, Sig=210,4 Ref=600,50

| Peak # | RetTime [min] | Type | Width [min] | Area [mAU*s] | Height [mAU] | Area %  |
|--------|---------------|------|-------------|--------------|--------------|---------|
| 1      | 2.799         | BB   | 0.0744      | 280.05371    | 45.12654     | 13.3822 |
| 2      | 3.035         | BB   | 0.0349      | 1812.67896   | 657.09686    | 86.6178 |

Totals : 2092.73267 702.22341

Supplementary Figure 256. LC-MS spectra of 41cl, MS: (M+H)<sup>+</sup>, found: 575.3.

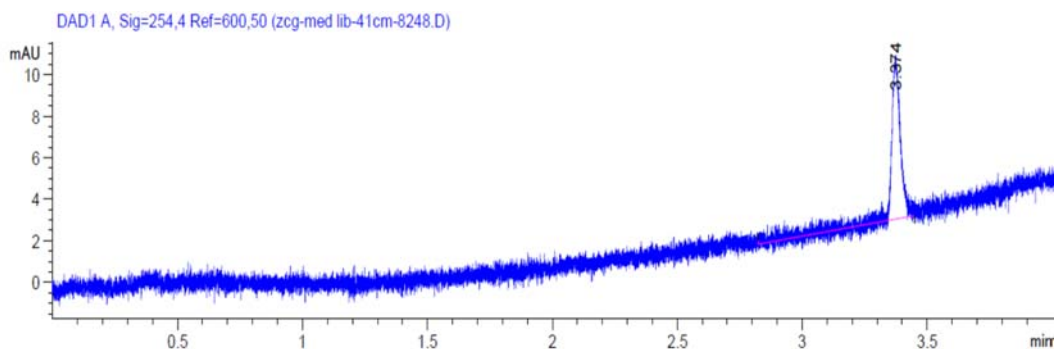

Signal 1: DAD1 A, Sig=254,4 Ref=600,50

| Peak # | RetTime [min] | Type | Width [min] | Area [mAU*s] | Height [mAU] | Area %   |
|--------|---------------|------|-------------|--------------|--------------|----------|
| 1      | 3.373         | BB   | 0.0387      | 20.24950     | 7.96697      | 100.0000 |

Totals : 20.24950 7.96697

Supplementary Figure 257. LC-MS spectra of 41cm, MS: (M+H)<sup>+</sup>, found: 609.2.

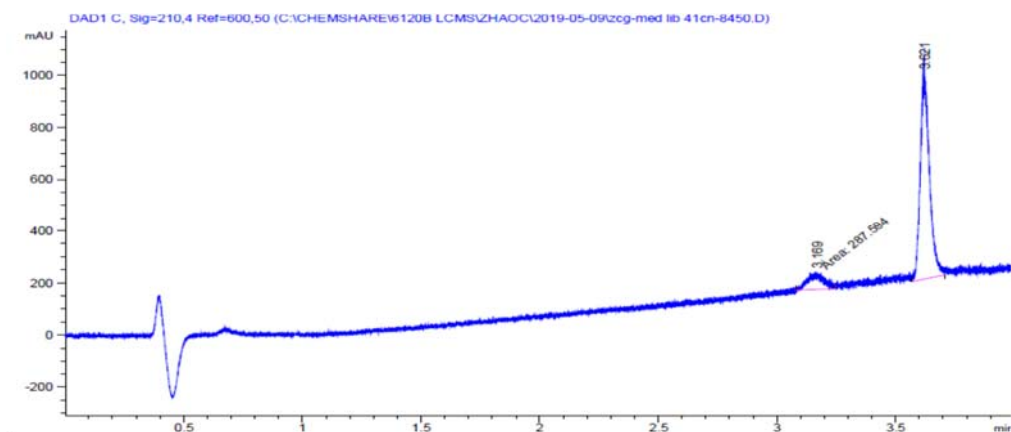

Signal 1: DAD1 C, Sig=210,4 Ref=600,50

| Peak # | RetTime [min] | Type | Width [min] | Area [mAU*s] | Height [mAU] | Area %  |
|--------|---------------|------|-------------|--------------|--------------|---------|
| 1      | 3.169         | MM   | 0.0691      | 287.59369    | 69.34865     | 11.8708 |
| 2      | 3.621         | BB   | 0.0326      | 2135.10474   | 796.69647    | 88.1292 |

Totals : 2422.69843 866.04512

Supplementary Figure 258. LC-MS spectra of **41cn**, MS: (M+H)<sup>+</sup>, found: 557.2.

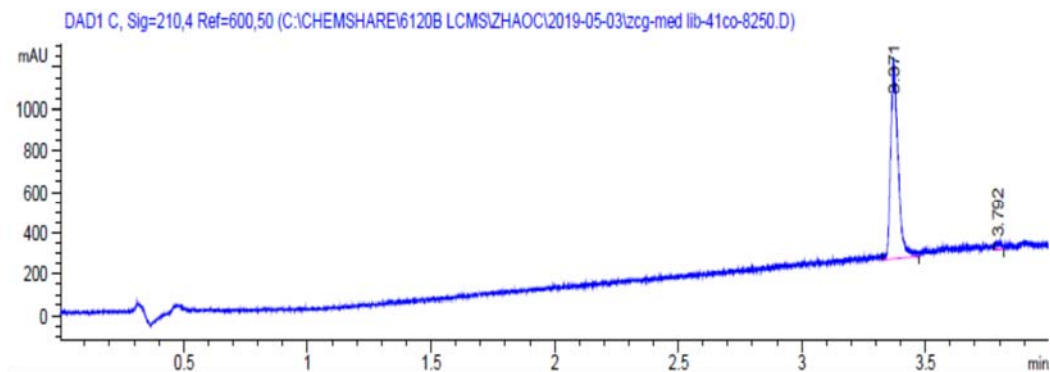

Signal 3: DAD1 C, Sig=210,4 Ref=600,50

| Peak # | RetTime [min] | Type | Width [min] | Area [mAU*s] | Height [mAU] | Area %  |
|--------|---------------|------|-------------|--------------|--------------|---------|
| 1      | 3.371         | BB   | 0.0305      | 1999.68420   | 879.60547    | 97.2583 |
| 2      | 3.792         | BB   | 0.0242      | 56.37052     | 30.53646     | 2.7417  |

Totals : 2056.05472 910.14193

Supplementary Figure 259. LC-MS spectra of **41co**, MS: (M+H)<sup>+</sup>, found: 623.2.

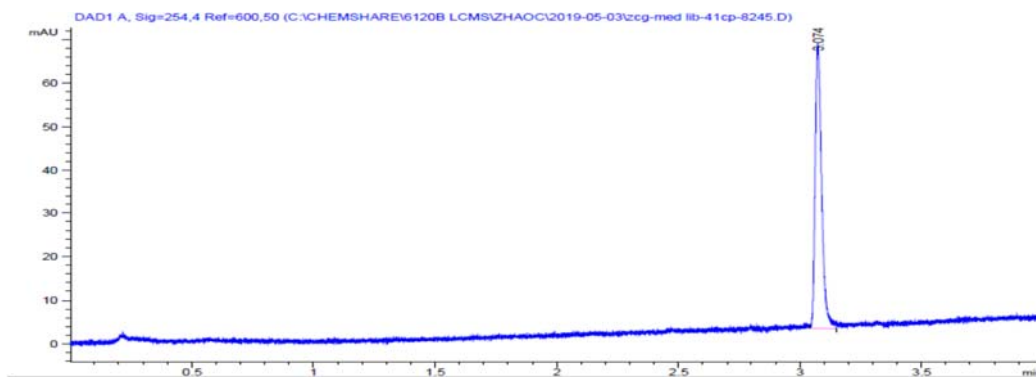

Signal 1: DAD1 A, Sig=254,4 Ref=600,50

| Peak # | RetTime [min] | Type | Width [min] | Area [mAU*s] | Height [mAU] | Area %   |
|--------|---------------|------|-------------|--------------|--------------|----------|
| 1      | 3.074         | BB   | 0.0287      | 121.62946    | 65.44843     | 100.0000 |

Totals : 121.62946 65.44843

Supplementary Figure 260. LC-MS spectra of **41cp**, MS: (M+H)<sup>+</sup>, found: 623.2.

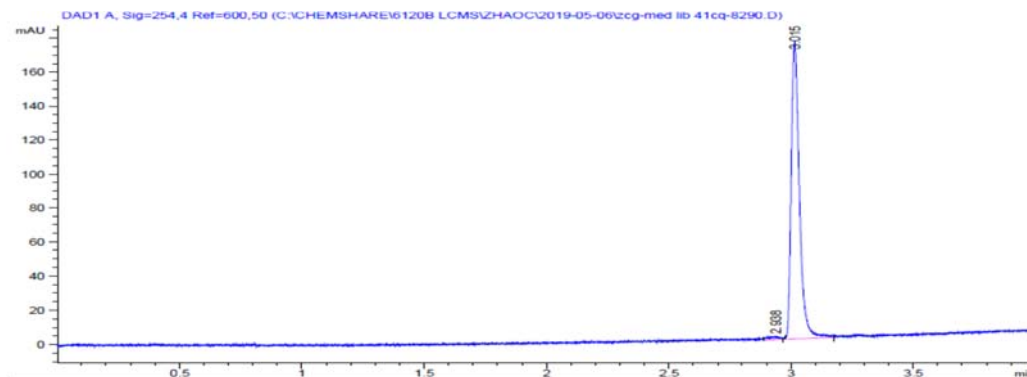

Signal 1: DAD1 A, Sig=254,4 Ref=600,50

| Peak # | RetTime [min] | Type | Width [min] | Area [mAU*s] | Height [mAU] | Area %  |
|--------|---------------|------|-------------|--------------|--------------|---------|
| 1      | 2.938         | BB   | 0.0412      | 5.94917      | 1.71070      | 1.4464  |
| 2      | 3.015         | BB   | 0.0354      | 405.35452    | 174.59377    | 98.5536 |

Totals : 411.30370 176.30446

Supplementary Figure 261. LC-MS spectra of **41cq**, MS: (M+H)<sup>+</sup>, found: 653.3.

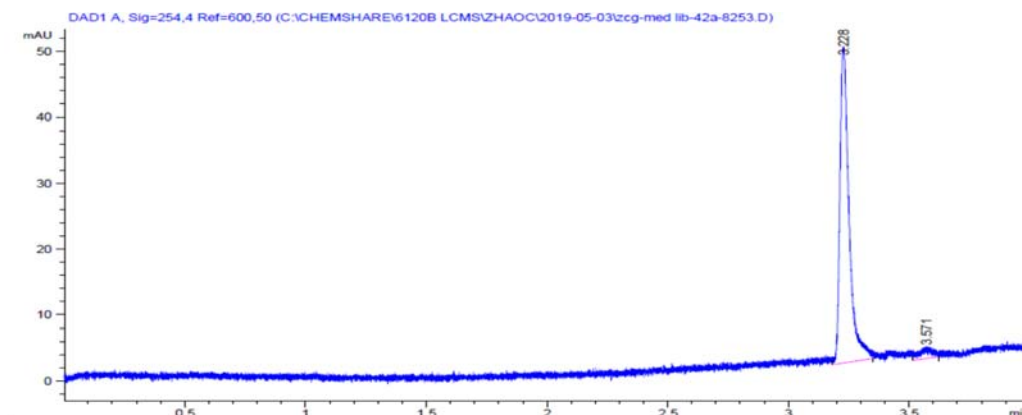

| Peak #   | RetTime [min] | Type | Width [min] | Area [mAU*s] | Height [mAU] | Area %  |
|----------|---------------|------|-------------|--------------|--------------|---------|
| 1        | 3.228         | BB   | 0.0400      | 126.64327    | 47.66279     | 95.4249 |
| 2        | 3.571         | BB   | 0.0452      | 6.07187      | 1.61405      | 4.5751  |
| Totals : |               |      |             | 132.71514    | 49.27685     |         |

Supplementary Figure 262. LC-MS spectra of **42a**, MS: (M+H)<sup>+</sup>, found: 439.2.

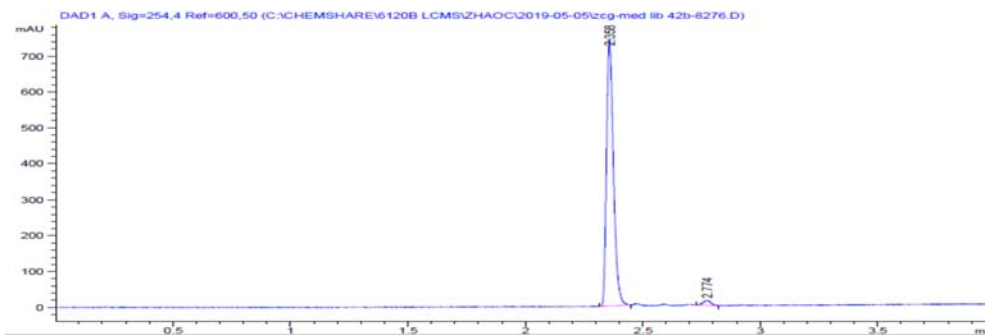

Signal 1: DAD1 A, Sig=254,4 Ref=600,50

| Peak #   | RetTime [min] | Type | Width [min] | Area [mAU*s] | Height [mAU] | Area %  |
|----------|---------------|------|-------------|--------------|--------------|---------|
| 1        | 2.358         | BB   | 0.0315      | 1525.38269   | 745.35980    | 97.9674 |
| 2        | 2.774         | BB   | 0.0345      | 31.64767     | 13.91463     | 2.0326  |
| Totals : |               |      |             | 1557.03036   | 759.27443    |         |

Supplementary Figure 267. LC-MS spectra of **42b**, MS: (M+H)<sup>+</sup>, found: 439.2.



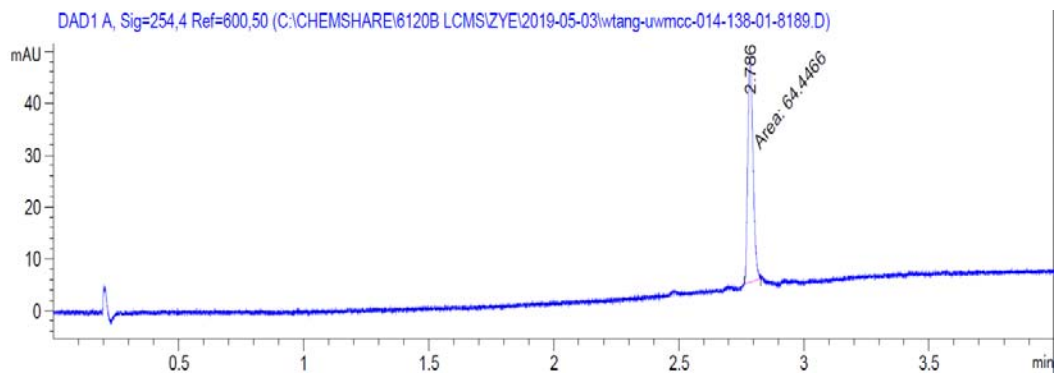

Signal 1: DAD1 A, Sig=254,4 Ref=600,50

| Peak # | RetTime [min] | Type | Width [min] | Area [mAU*s] | Height [mAU] | Area %   |
|--------|---------------|------|-------------|--------------|--------------|----------|
| 1      | 2.786         | MM   | 0.0250      | 64.44662     | 43.03405     | 100.0000 |

Totals : 64.44662 43.03405

**Supplementary Figure 268.** LC-MS spectra of **43a**: retention time, 2.786 min; MS (M+H)<sup>+</sup> found 429.1

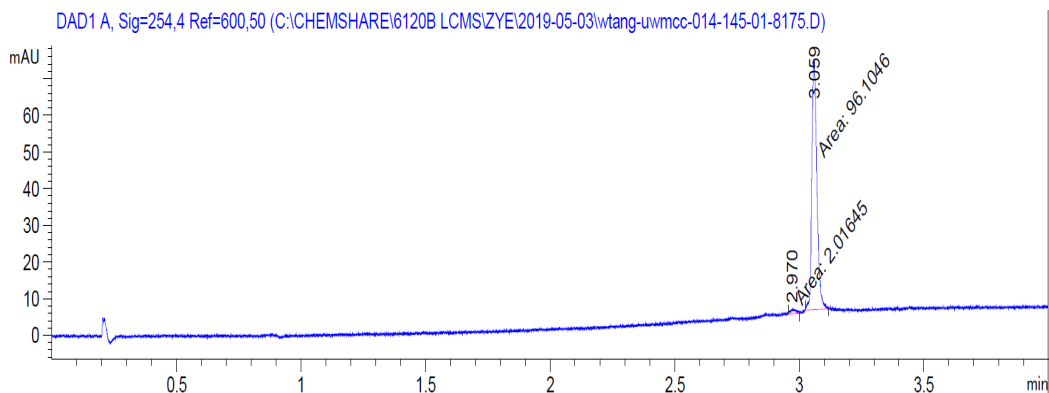

Signal 1: DAD1 A, Sig=254,4 Ref=600,50

| Peak # | RetTime [min] | Type | Width [min] | Area [mAU*s] | Height [mAU] | Area %  |
|--------|---------------|------|-------------|--------------|--------------|---------|
| 1      | 2.970         | MM   | 0.0236      | 2.01645      | 1.42702      | 2.0551  |
| 2      | 3.059         | MM   | 0.0236      | 96.10456     | 67.79678     | 97.9449 |

Totals : 98.12101 69.22381

**Supplementary Figure 269.** LC-MS spectra of **43b**: retention time, 3.059 min; MS (M+H)<sup>+</sup> found 427.2

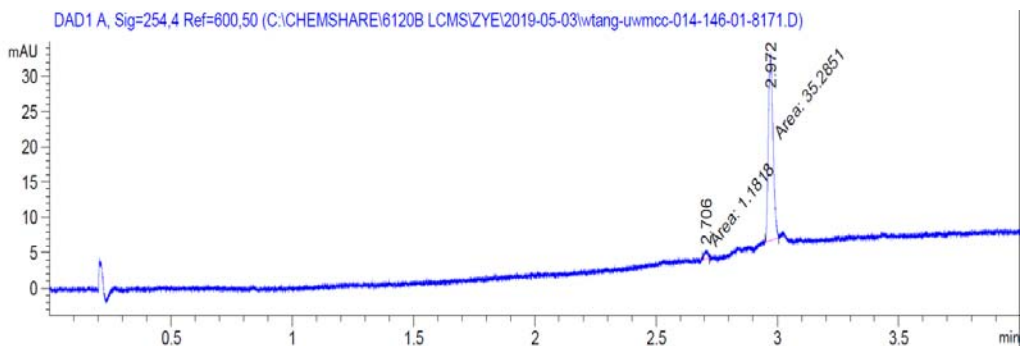

Signal 1: DAD1 A, Sig=254,4 Ref=600,50

| Peak # | RetTime [min] | Type | Width [min] | Area [mAU*s] | Height [mAU] | Area %  |
|--------|---------------|------|-------------|--------------|--------------|---------|
| 1      | 2.706         | MM   | 0.0163      | 1.18180      | 1.20795      | 3.2407  |
| 2      | 2.972         | MM   | 0.0226      | 35.28513     | 26.02234     | 96.7593 |

Totals : 36.46693 27.23029

Supplementary Figure 270. LC-MS spectra of **43c**: retention time, 2.972 min; MS (M+H)<sup>+</sup> found 413.1

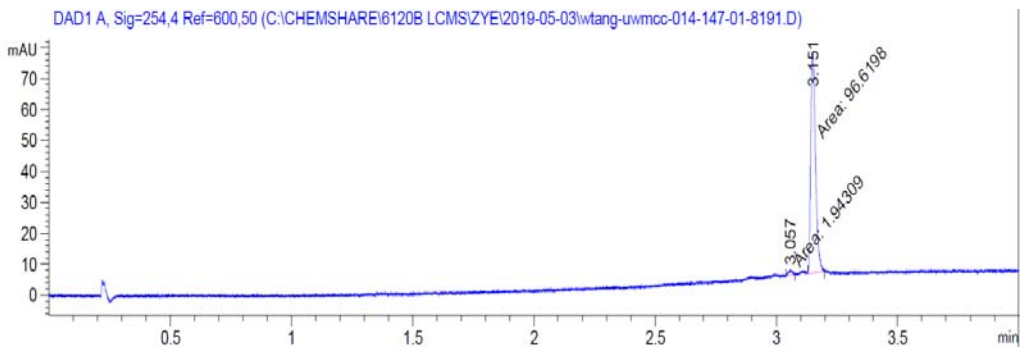

Signal 1: DAD1 A, Sig=254,4 Ref=600,50

| Peak # | RetTime [min] | Type | Width [min] | Area [mAU*s] | Height [mAU] | Area %  |
|--------|---------------|------|-------------|--------------|--------------|---------|
| 1      | 3.057         | MM   | 0.0200      | 1.94309      | 1.61833      | 1.9714  |
| 2      | 3.151         | MM   | 0.0226      | 96.61982     | 71.15961     | 98.0286 |

Totals : 98.56291 72.77795

Supplementary Figure 271. LC-MS spectra of **43d**: retention time, 3.151 min; MS (M+H)<sup>+</sup> found 475.1

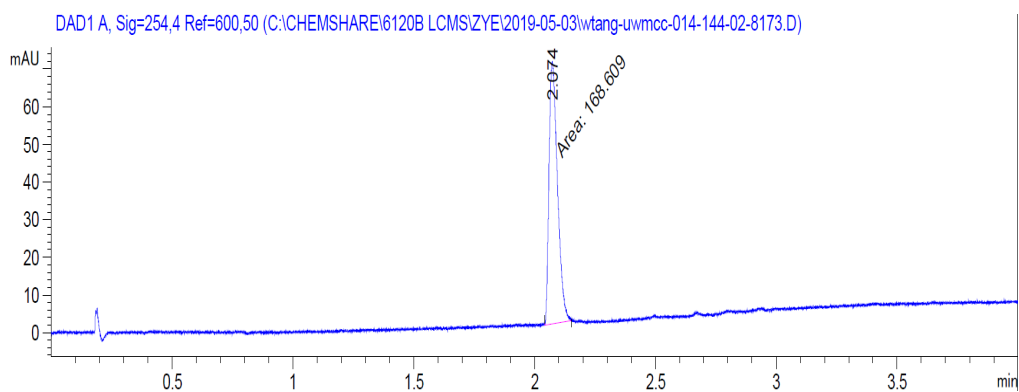

Signal 1: DAD1 A, Sig=254,4 Ref=600,50

| Peak # | RetTime [min] | Type | Width [min] | Area [mAU*s] | Height [mAU] | Area %   |
|--------|---------------|------|-------------|--------------|--------------|----------|
| 1      | 2.074         | MM   | 0.0405      | 168.60870    | 69.45885     | 100.0000 |

Totals : 168.60870 69.45885

Supplementary Figure 272. LC-MS spectra of **43e**: retention time, 2.074 min; MS (M+H)<sup>+</sup> found 442.2

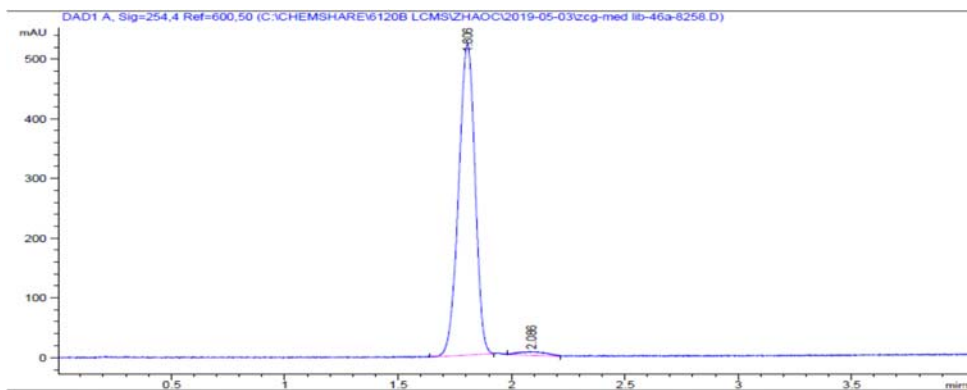

Signal 1: DAD1 A, Sig=254,4 Ref=600,50

| Peak # | RetTime [min] | Type | Width [min] | Area [mAU*s] | Height [mAU] | Area %  |
|--------|---------------|------|-------------|--------------|--------------|---------|
| 1      | 1.806         | BB   | 0.0788      | 2627.26758   | 521.23181    | 98.1199 |
| 2      | 2.086         | BB   | 0.1020      | 50.34156     | 5.83639      | 1.8801  |

Totals : 2677.60914 527.06820

Supplementary Figure 273. LC-MS spectra of **46a**, MS: (M+H)<sup>+</sup>, found: 619.2.

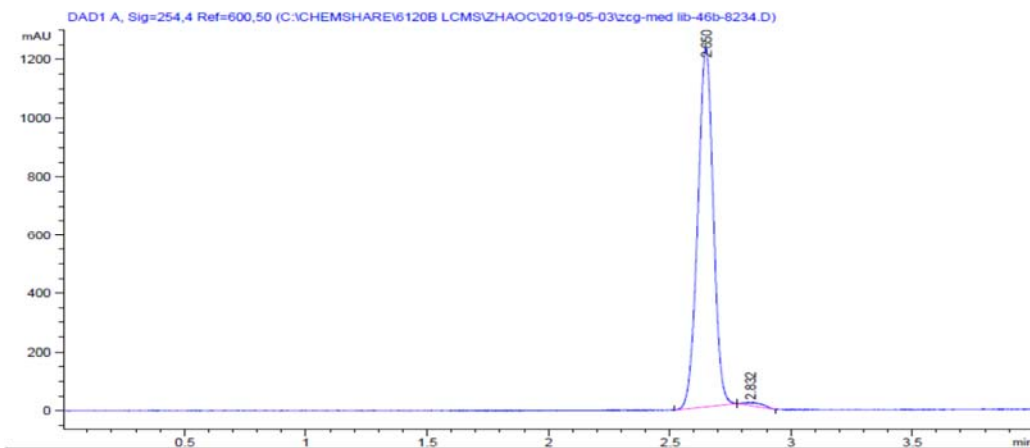

| Peak # | RetTime [min] | Type | Width [min] | Area [mAU*s] | Height [mAU] | Area %  |
|--------|---------------|------|-------------|--------------|--------------|---------|
| 1      | 2.650         | BB   | 0.0693      | 5447.17773   | 1222.09045   | 98.8819 |
| 2      | 2.832         | BB   | 0.0762      | 61.59166     | 9.64379      | 1.1181  |

Totals : 5508.76939 1231.73425

Supplementary Figure 274. LC-MS spectra of **46b**, MS: (M+H)<sup>+</sup>, found: 653.2.

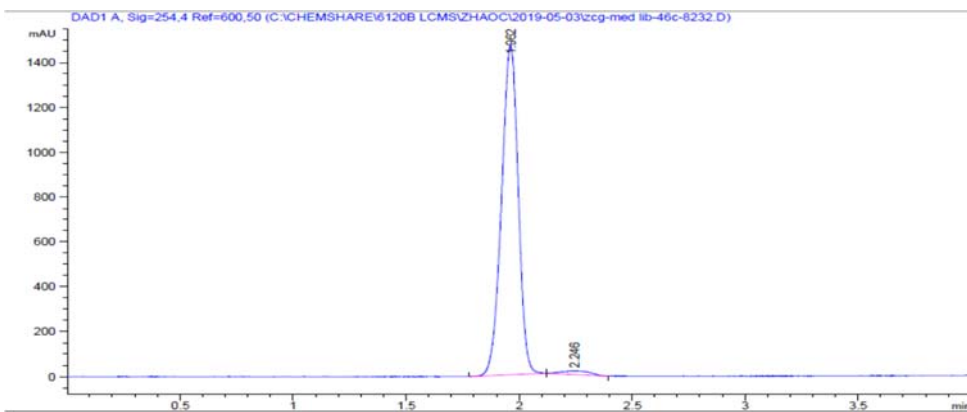

| Peak # | RetTime [min] | Type | Width [min] | Area [mAU*s] | Height [mAU] | Area %  |
|--------|---------------|------|-------------|--------------|--------------|---------|
| 1      | 1.962         | BB   | 0.0792      | 7535.39160   | 1461.24268   | 98.1576 |
| 2      | 2.246         | BB   | 0.1032      | 141.43507    | 16.14976     | 1.8424  |

Totals : 7676.82668 1477.39243

Supplementary Figure 275. LC-MS spectra of **46c**, MS: (M+H)<sup>+</sup>, found: 649.2.



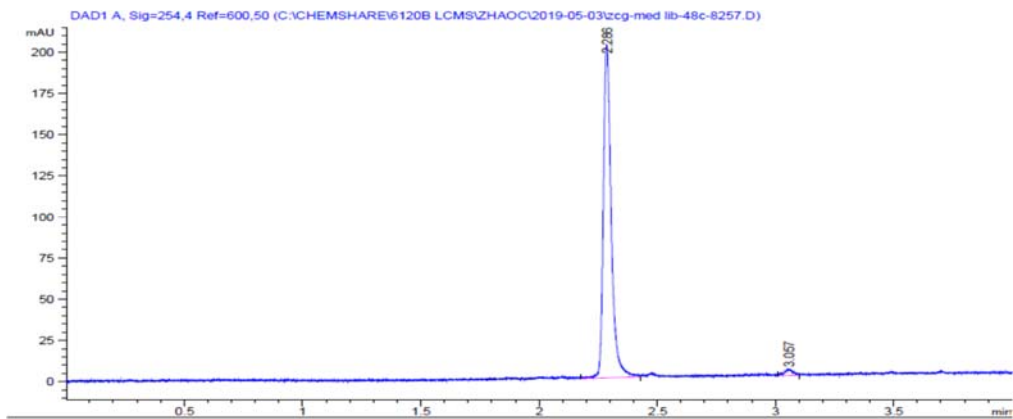

Signal 1: DAD1 A, Sig=254,4 Ref=600,50

| Peak # | RetTime [min] | Type | Width [min] | Area [mAU*s] | Height [mAU] | Area %  |
|--------|---------------|------|-------------|--------------|--------------|---------|
| 1      | 2.286         | BB   | 0.0347      | 468.67633    | 202.44060    | 97.9859 |
| 2      | 3.057         | BB   | 0.0344      | 9.63371      | 3.50040      | 2.0141  |

Totals : 478.31004 205.94099

Supplementary Figure 278. LC-MS spectra of **48c**, MS: (M+H)<sup>+</sup>, found: 524.1.

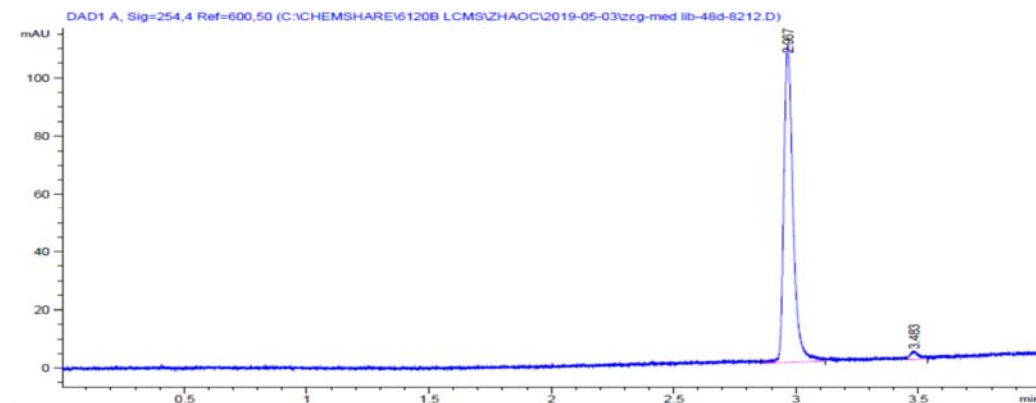

| Peak # | RetTime [min] | Type | Width [min] | Area [mAU*s] | Height [mAU] | Area %  |
|--------|---------------|------|-------------|--------------|--------------|---------|
| 1      | 2.967         | BB   | 0.0411      | 288.32559    | 109.45775    | 97.5198 |
| 2      | 3.483         | BB   | 0.0353      | 7.33278      | 2.70836      | 2.4802  |

Totals : 295.65837 112.16611

Supplementary Figure 279. LC-MS spectra of **48d**, MS: (M+H)<sup>+</sup>, found: 474.1.

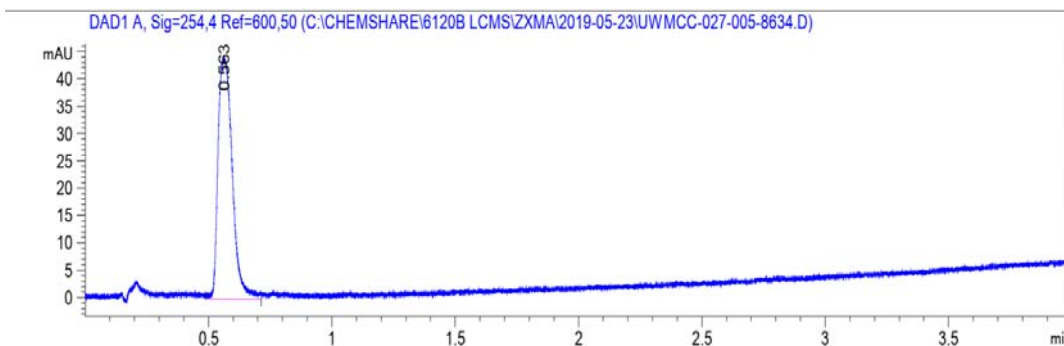

Signal 1: DAD1 A, Sig=254,4 Ref=600,50

| Peak # | RetTime [min] | Type | Width [min] | Area [mAU*s] | Height [mAU] | Area %   |
|--------|---------------|------|-------------|--------------|--------------|----------|
| 1      | 0.563         | BB   | 0.0635      | 177.16956    | 43.83995     | 100.0000 |

Totals : 177.16956 43.83995

Supplementary Figure 280. LC-MS spectra of **47aa**, MS: [M+Na]<sup>+</sup>, found: 464.1.

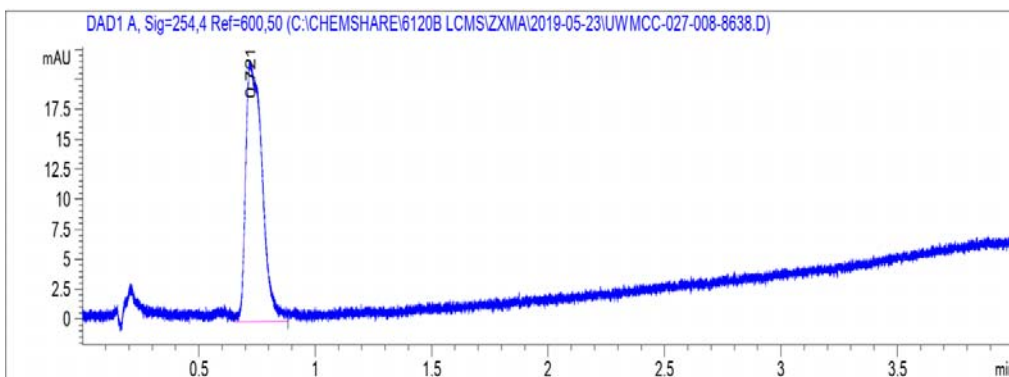

Signal 1: DAD1 A, Sig=254,4 Ref=600,50

| Peak # | RetTime [min] | Type | Width [min] | Area [mAU*s] | Height [mAU] | Area %   |
|--------|---------------|------|-------------|--------------|--------------|----------|
| 1      | 0.721         | BB   | 0.0672      | 106.88324    | 21.40781     | 100.0000 |

Totals : 106.88324 21.40781

Supplementary Figure 281. LC-MS spectra of **47ab**, MS: [M+Na]<sup>+</sup>, found: 478.1.

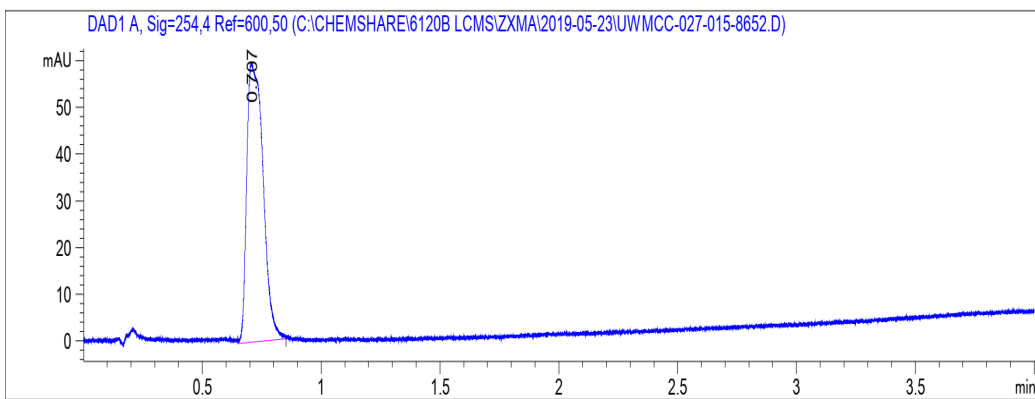

Signal 1: DAD1 A, Sig=254,4 Ref=600,50

| Peak # | RetTime [min] | Type | Width [min] | Area [mAU*s] | Height [mAU] | Area %   |
|--------|---------------|------|-------------|--------------|--------------|----------|
| 1      | 0.707         | BB   | 0.0644      | 284.24057    | 59.46888     | 100.0000 |

Totals : 284.24057 59.46888

Supplementary Figure 282. LC-MS spectra of **47ah**, MS: [M+H]<sup>+</sup>, found: 500.1.

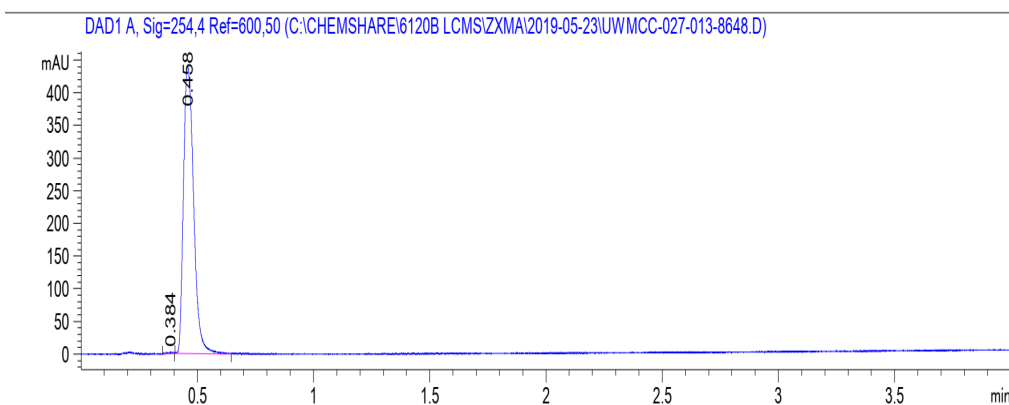

Signal 1: DAD1 A, Sig=254,4 Ref=600,50

| Peak # | RetTime [min] | Type | Width [min] | Area [mAU*s] | Height [mAU] | Area %  |
|--------|---------------|------|-------------|--------------|--------------|---------|
| 1      | 0.384         | BB   | 0.0265      | 3.53245      | 1.63467      | 0.2643  |
| 2      | 0.458         | BB   | 0.0483      | 1332.84595   | 440.24777    | 99.7357 |

Totals : 1336.37840 441.88244

Supplementary Figure 283. LC-MS spectra of **47ak**, MS: [M+H]<sup>+</sup>, found: 533.2.



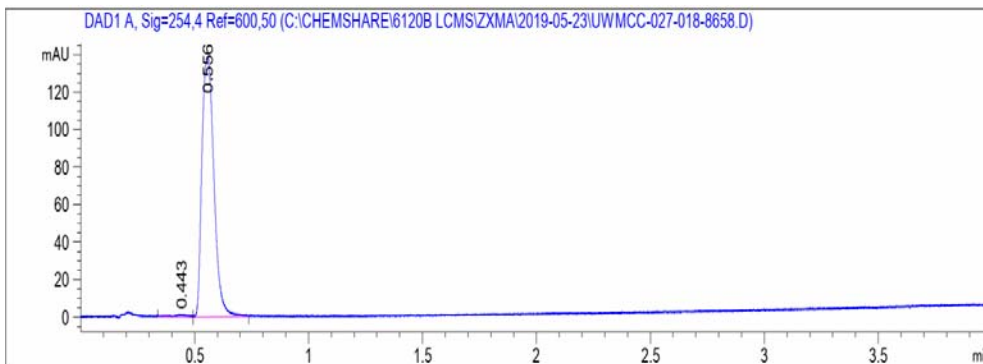

Signal 1: DAD1 A, Sig=254,4 Ref=600,50

| Peak # | RetTime [min] | Type | Width [min] | Area [mAU*s] | Height [mAU] | Area %  |
|--------|---------------|------|-------------|--------------|--------------|---------|
| 1      | 0.443         | BB   | 0.0611      | 6.85801      | 1.33867      | 1.3243  |
| 2      | 0.556         | BB   | 0.0596      | 510.98947    | 138.94984    | 98.6757 |

Totals : 517.84748 140.28852

Supplementary Figure 284. LC-MS spectra of 47aI, MS: [M+H]<sup>+</sup>, found: 533.2.

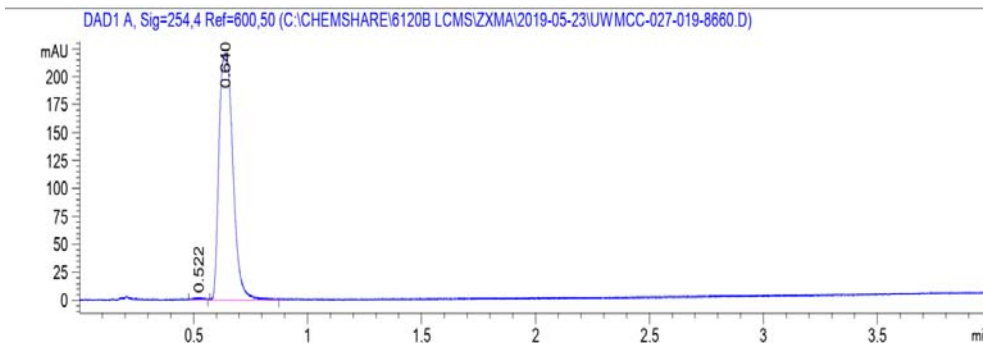

Signal 1: DAD1 A, Sig=254,4 Ref=600,50

| Peak # | RetTime [min] | Type | Width [min] | Area [mAU*s] | Height [mAU] | Area %  |
|--------|---------------|------|-------------|--------------|--------------|---------|
| 1      | 0.522         | BB   | 0.0400      | 5.08074      | 1.53367      | 0.5408  |
| 2      | 0.640         | BB   | 0.0682      | 934.33435    | 219.93929    | 99.4592 |

Totals : 939.41509 221.47296

Supplementary Figure 285. LC-MS spectra of 47am, MS: [M+H]<sup>+</sup>, found: 533.2.

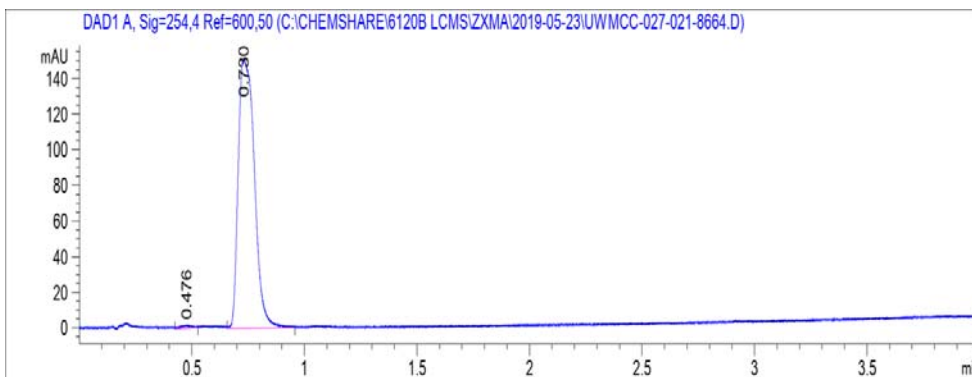

Signal 1: DAD1 A, Sig=254,4 Ref=600,50

| Peak # | RetTime [min] | Type | Width [min] | Area [mAU*s] | Height [mAU] | Area %  |
|--------|---------------|------|-------------|--------------|--------------|---------|
| 1      | 0.476         | BB   | 0.0457      | 5.45476      | 1.43561      | 0.7163  |
| 2      | 0.730         | BB   | 0.0691      | 756.04346    | 150.90480    | 99.2837 |

Totals : 761.49822 152.34041

Supplementary Figure 286. LC-MS spectra of 47aq, MS: [M+Na]<sup>+</sup>, found: 584.2.

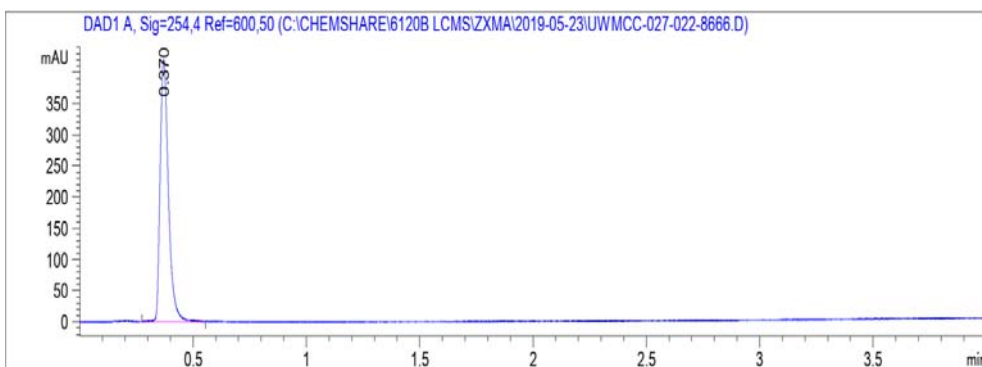

Signal 1: DAD1 A, Sig=254,4 Ref=600,50

| Peak # | RetTime [min] | Type | Width [min] | Area [mAU*s] | Height [mAU] | Area %   |
|--------|---------------|------|-------------|--------------|--------------|----------|
| 1      | 0.370         | BB   | 0.0394      | 1080.13354   | 419.19431    | 100.0000 |

Totals : 1080.13354 419.19431

Supplementary Figure 287. LC-MS spectra of 47ar, MS: [M+H]<sup>+</sup>, found: 547.2.

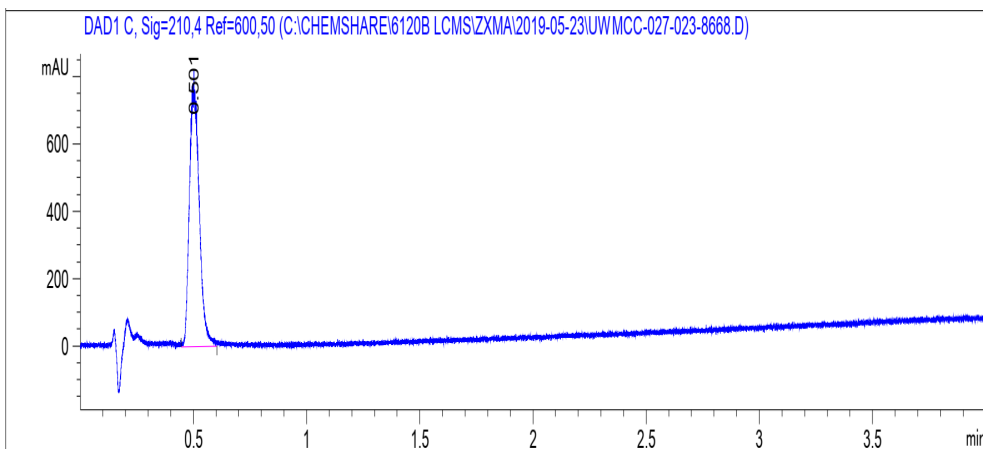

Signal 3: DAD1 C, Sig=210,4 Ref=600,50

| Peak # | RetTime [min] | Type | Width [min] | Area [mAU*s] | Height [mAU] | Area %   |
|--------|---------------|------|-------------|--------------|--------------|----------|
| 1      | 0.501         | BB   | 0.0469      | 2365.79199   | 755.49298    | 100.0000 |

Totals : 2365.79199 755.49298

Supplementary Figure 288. LC-MS spectra of 47as, MS: [M+H]<sup>+</sup>, found: 547.2.

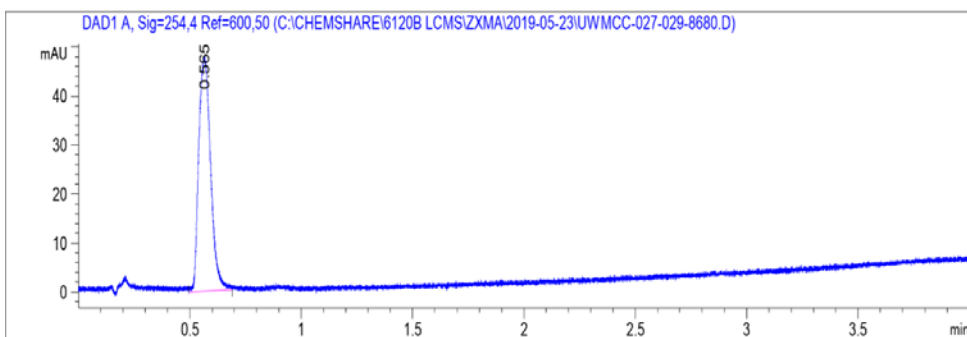

Signal 1: DAD1 A, Sig=254,4 Ref=600,50

| Peak # | RetTime [min] | Type | Width [min] | Area [mAU*s] | Height [mAU] | Area %   |
|--------|---------------|------|-------------|--------------|--------------|----------|
| 1      | 0.565         | BB   | 0.0593      | 177.92407    | 47.92444     | 100.0000 |

Totals : 177.92407 47.92444

Supplementary Figure 289. LC-MS spectra of 47av, MS: [M+Na]<sup>+</sup>, found: 522.2.

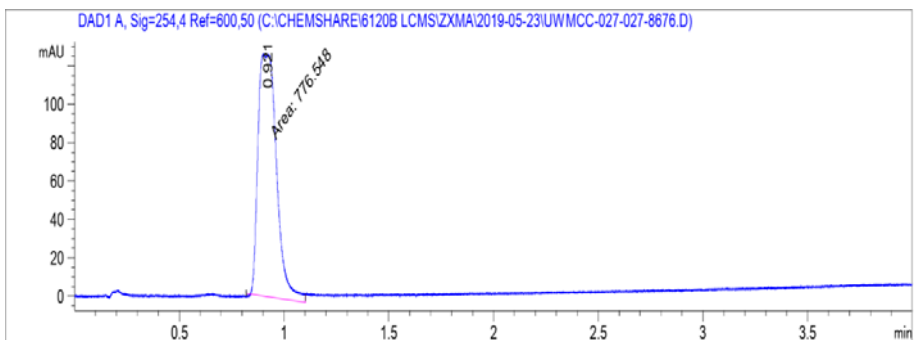

Signal 1: DAD1 A, Sig=254,4 Ref=600,50

| Peak # | RetTime [min] | Type | Width [min] | Area [mAU*s] | Height [mAU] | Area %   |
|--------|---------------|------|-------------|--------------|--------------|----------|
| 1      | 0.921         | MM   | 0.1025      | 776.54773    | 126.23119    | 100.0000 |

Totals : 776.54773 126.23119

Supplementary Figure 290. LC-MS spectra of 47aw, MS: [M+H]<sup>+</sup>, found: 562.2.

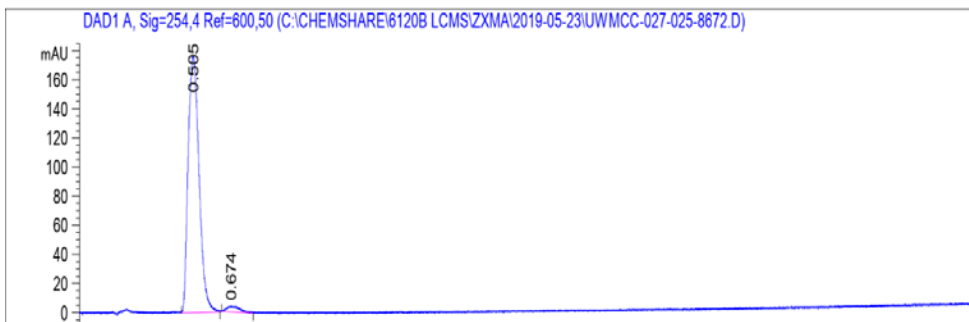

Signal 1: DAD1 A, Sig=254,4 Ref=600,50

| Peak # | RetTime [min] | Type | Width [min] | Area [mAU*s] | Height [mAU] | Area %  |
|--------|---------------|------|-------------|--------------|--------------|---------|
| 1      | 0.505         | BB   | 0.0544      | 593.88306    | 175.90561    | 97.2173 |
| 2      | 0.674         | BB   | 0.0523      | 16.99913     | 3.89387      | 2.7827  |

Totals : 610.88219 179.79948

Supplementary Figure 291. LC-MS spectra of 47ax, MS: [M+H]<sup>+</sup>, found: 486.1.

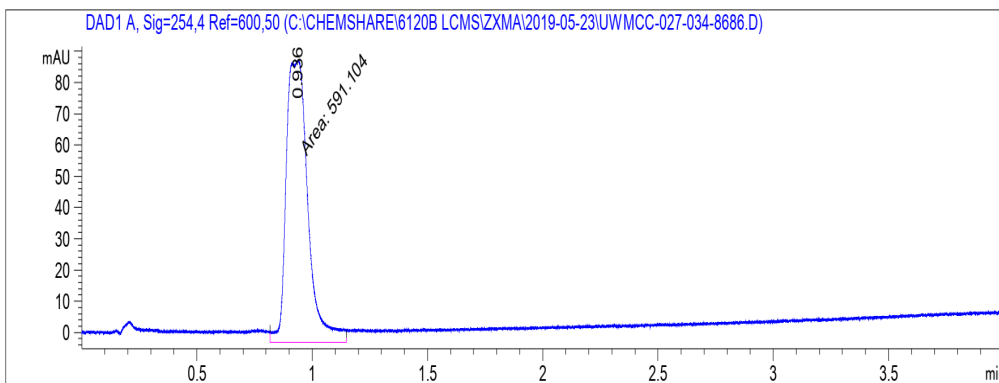

Signal 1: DAD1 A, Sig=254,4 Ref=600,50

| Peak # | RetTime [min] | Type | Width [min] | Area [mAU*s] | Height [mAU] | Area %   |
|--------|---------------|------|-------------|--------------|--------------|----------|
| 1      | 0.936         | MM   | 0.1094      | 591.10419    | 90.03129     | 100.0000 |

Totals : 591.10419 90.03129

Supplementary Figure 292. LC-MS spectra of 47ay, MS: [M+H]<sup>+</sup>, found: 576.1.

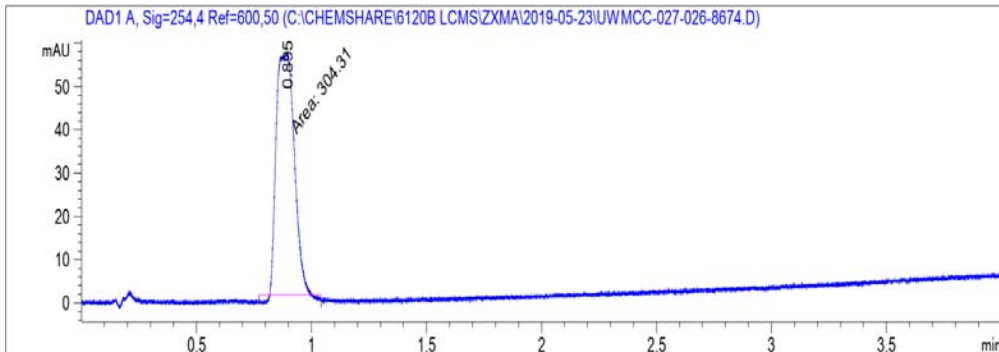

Signal 1: DAD1 A, Sig=254,4 Ref=600,50

| Peak # | RetTime [min] | Type | Width [min] | Area [mAU*s] | Height [mAU] | Area %   |
|--------|---------------|------|-------------|--------------|--------------|----------|
| 1      | 0.895         | MM   | 0.0914      | 304.30957    | 55.49830     | 100.0000 |

Totals : 304.30957 55.49830

Supplementary Figure 293. LC-MS spectra of 47az, MS: [M+Na]<sup>+</sup>, found: 550.2.

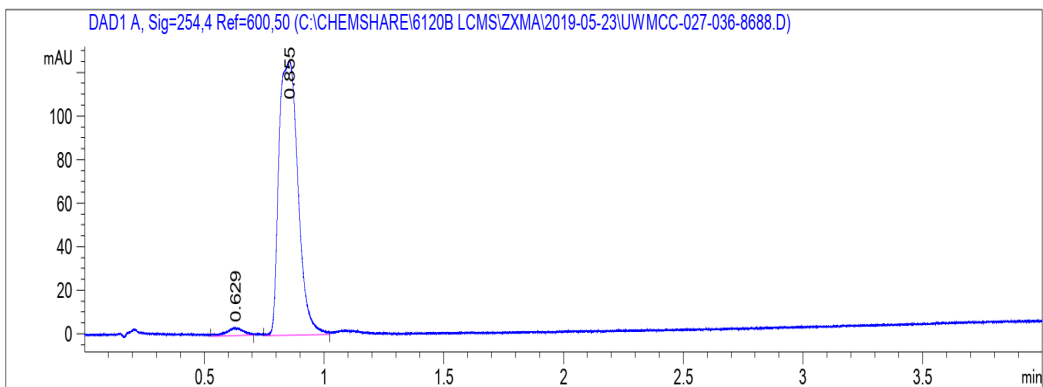

Signal 1: DAD1 A, Sig=254,4 Ref=600,50

| Peak # | RetTime [min] | Type | Width [min] | Area [mAU*s] | Height [mAU] | Area %  |
|--------|---------------|------|-------------|--------------|--------------|---------|
| 1      | 0.629         | BB   | 0.0667      | 18.19019     | 3.34867      | 2.5439  |
| 2      | 0.855         | BB   | 0.0767      | 696.84882    | 125.70684    | 97.4561 |

Totals : 715.03901 129.05551

Supplementary Figure 294. LC-MS spectra of 47ba, MS: [M+H]<sup>+</sup>, found: 528.2.

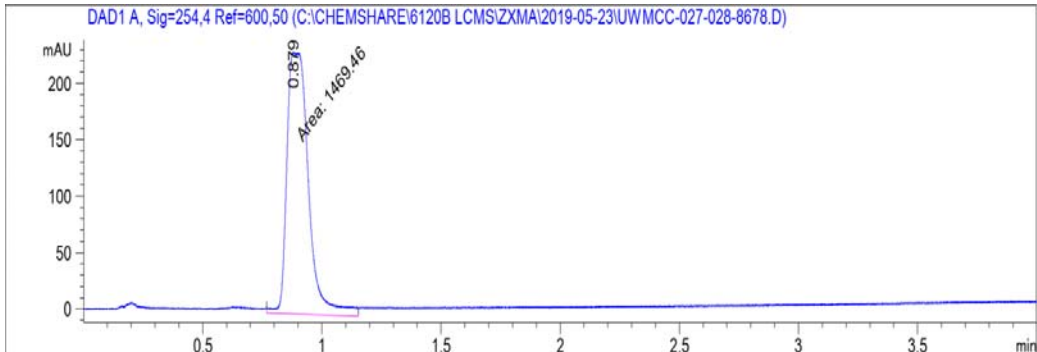

Signal 1: DAD1 A, Sig=254,4 Ref=600,50

| Peak # | RetTime [min] | Type | Width [min] | Area [mAU*s] | Height [mAU] | Area %   |
|--------|---------------|------|-------------|--------------|--------------|----------|
| 1      | 0.879         | MM   | 0.1056      | 1469.46326   | 231.90567    | 100.0000 |

Totals : 1469.46326 231.90567

Supplementary Figure 295. LC-MS spectra of 47bb, MS: [M+H]<sup>+</sup>, found: 562.2.

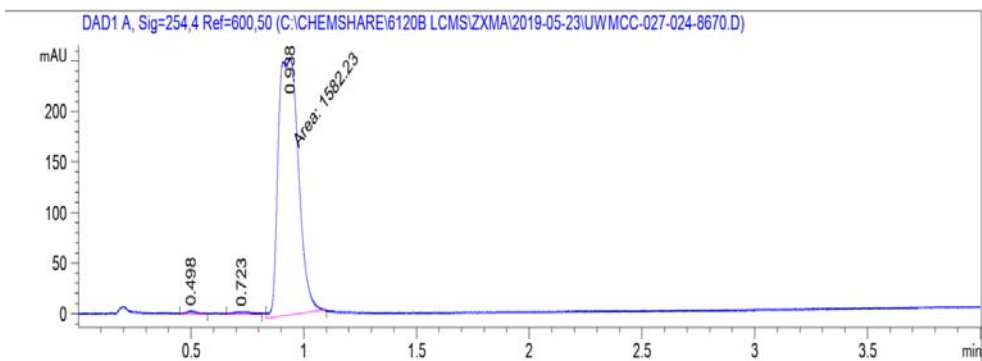

Signal 1: DAD1 A, Sig=254,4 Ref=600,50

| Peak # | RetTime [min] | Type | Width [min] | Area [mAU*s] | Height [mAU] | Area %  |
|--------|---------------|------|-------------|--------------|--------------|---------|
| 1      | 0.498         | BB   | 0.0471      | 8.58646      | 2.23702      | 0.5360  |
| 2      | 0.723         | BB   | 0.0683      | 11.20103     | 1.94232      | 0.6992  |
| 3      | 0.938         | MM   | 0.1037      | 1582.23193   | 254.23346    | 98.7648 |

Totals : 1602.01943 258.41279

Supplementary Figure 296. LC-MS spectra of **47bc**, MS:  $[M+H]^+$ , found: 576.2.

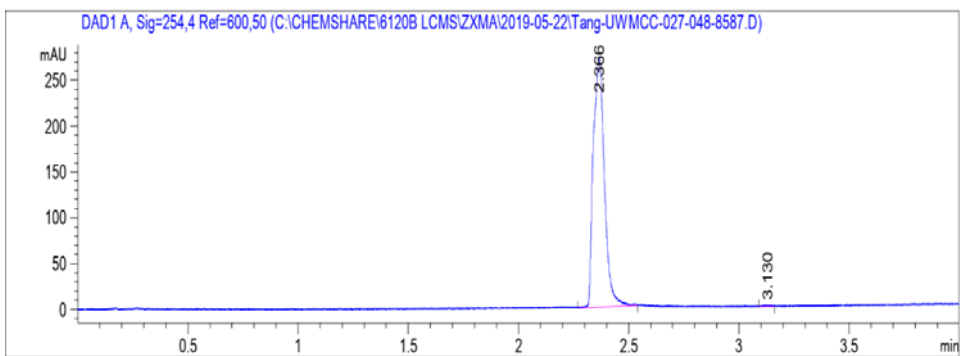

Signal 1: DAD1 A, Sig=254,4 Ref=600,50

| Peak # | RetTime [min] | Type | Width [min] | Area [mAU*s] | Height [mAU] | Area %  |
|--------|---------------|------|-------------|--------------|--------------|---------|
| 1      | 2.366         | BB   | 0.0492      | 954.99274    | 272.83850    | 99.5868 |
| 2      | 3.130         | BB   | 0.0377      | 3.96280      | 1.28371      | 0.4132  |

Totals : 958.95553 274.12221

Supplementary Figure 297. LC-MS spectra of **47be**, MS:  $[M+H]^+$ , found: 530.1.

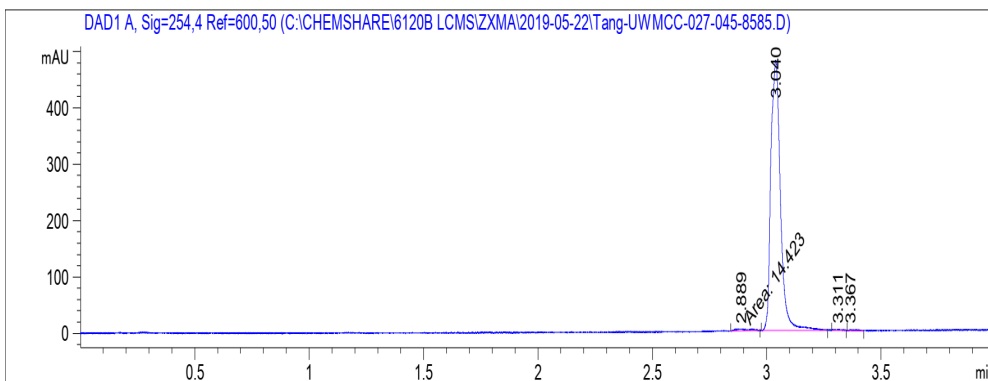

Signal 1: DAD1 A, Sig=254,4 Ref=600,50

| Peak # | RetTime [min] | Type | Width [min] | Area [mAU*s] | Height [mAU] | Area %  |
|--------|---------------|------|-------------|--------------|--------------|---------|
| 1      | 2.889         | MM   | 0.0720      | 14.42300     | 3.33998      | 1.0143  |
| 2      | 3.040         | BB   | 0.0410      | 1399.37488   | 479.99518    | 98.4145 |
| 3      | 3.311         | BB   | 0.0308      | 4.36962      | 1.69264      | 0.3073  |
| 4      | 3.367         | BB   | 0.0393      | 3.75224      | 1.15378      | 0.2639  |

Totals : 1421.91974 486.18158

Supplementary Figure 298. LC-MS spectra of 47bf, MS: [M+H]<sup>+</sup>, found: 590.2.

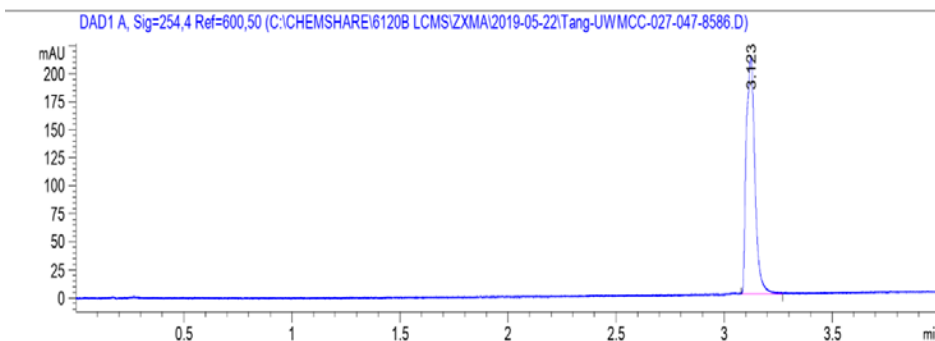

Signal 1: DAD1 A, Sig=254,4 Ref=600,50

| Peak # | RetTime [min] | Type | Width [min] | Area [mAU*s] | Height [mAU] | Area %   |
|--------|---------------|------|-------------|--------------|--------------|----------|
| 1      | 3.123         | BB   | 0.0390      | 588.54791    | 212.54967    | 100.0000 |

Totals : 588.54791 212.54967

Supplementary Figure 299. LC-MS spectra of 47bg, MS: [M+H]<sup>+</sup>, found: 556.2.



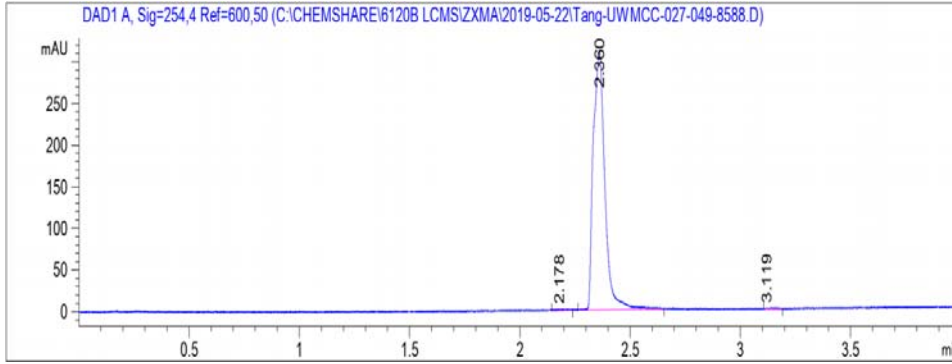

Signal 1: DAD1 A, Sig=254,4 Ref=600,50

| Peak # | RetTime [min] | Type | Width [min] | Area [mAU*s] | Height [mAU] | Area %  |
|--------|---------------|------|-------------|--------------|--------------|---------|
| 1      | 2.178         | BB   | 0.0490      | 4.91972      | 1.21348      | 0.4273  |
| 2      | 2.360         | BB   | 0.0518      | 1141.61902   | 311.04358    | 99.1498 |
| 3      | 3.119         | BB   | 0.0447      | 4.86955      | 1.32989      | 0.4229  |

Totals : 1151.40829 313.58694

Supplementary Figure 300. LC-MS spectra of 47bh, MS: [M+H]<sup>+</sup>, found: 530.1.

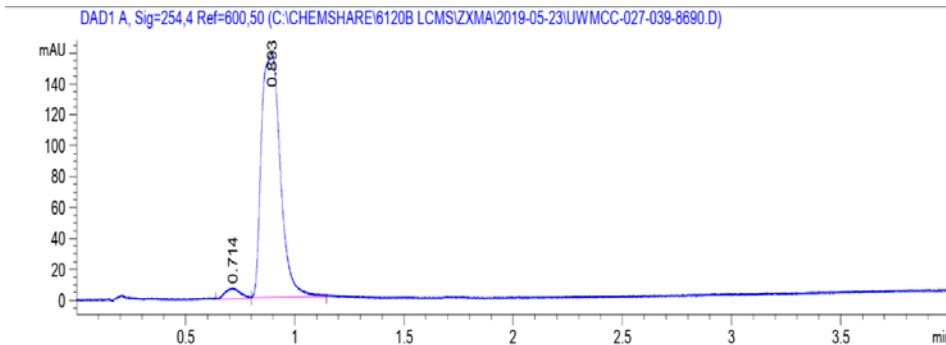

Signal 1: DAD1 A, Sig=254,4 Ref=600,50

| Peak # | RetTime [min] | Type | Width [min] | Area [mAU*s] | Height [mAU] | Area %  |
|--------|---------------|------|-------------|--------------|--------------|---------|
| 1      | 0.714         | BB   | 0.0608      | 32.51508     | 6.52767      | 3.3045  |
| 2      | 0.893         | BB   | 0.0824      | 951.43506    | 158.31516    | 96.6955 |

Totals : 983.95014 164.84282

Supplementary Figure 301. LC-MS spectra of 47bi, MS: [M+H]<sup>+</sup>, found: 590.2.

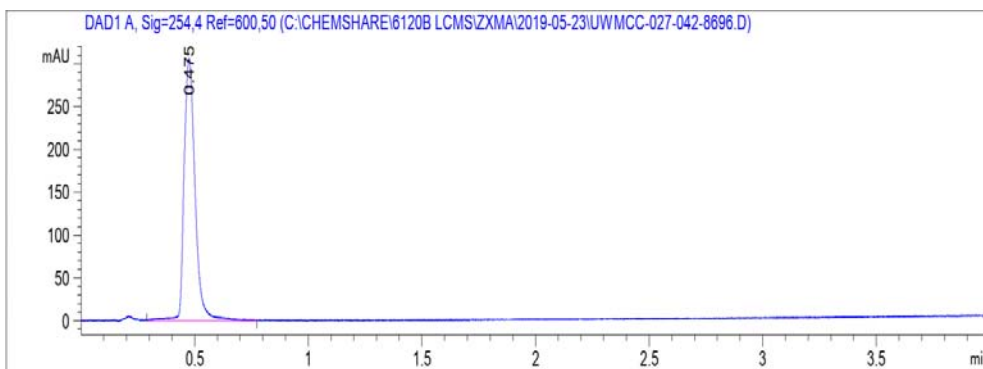

Signal 1: DAD1 A, Sig=254,4 Ref=600,50

| Peak # | RetTime [min] | Type | Width [min] | Area [mAU*s] | Height [mAU] | Area %   |
|--------|---------------|------|-------------|--------------|--------------|----------|
| 1      | 0.475         | BB   | 0.0537      | 1040.33667   | 305.77939    | 100.0000 |

Totals : 1040.33667 305.77939

Supplementary Figure 302. LC-MS spectra of 47bj, MS: [M+Na]<sup>+</sup>, found: 522.1.

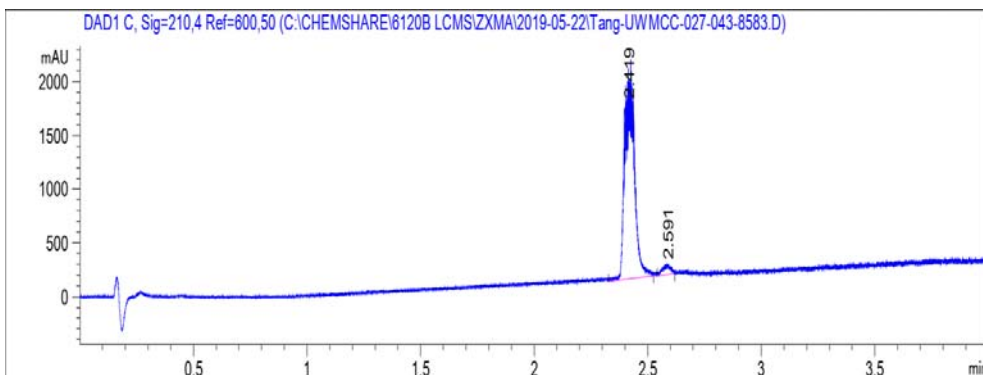

Signal 3: DAD1 C, Sig=210,4 Ref=600,50

| Peak # | RetTime [min] | Type | Width [min] | Area [mAU*s] | Height [mAU] | Area %  |
|--------|---------------|------|-------------|--------------|--------------|---------|
| 1      | 2.419         | BB   | 0.0413      | 5472.94043   | 1624.40723   | 95.7735 |
| 2      | 2.591         | BB   | 0.0326      | 241.51938    | 92.14283     | 4.2265  |

Totals : 5714.45981 1716.55006

Supplementary Figure 303. LC-MS spectra of 47bk, MS: [M+H]<sup>+</sup>, found: 606.2.

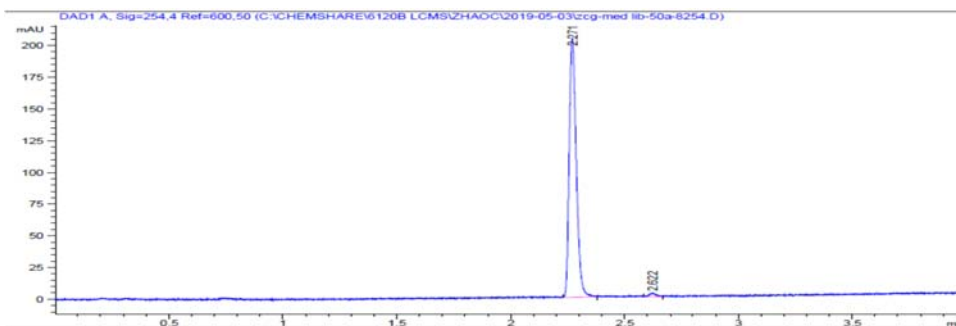

Signal 1: DAD1 A, Sig=254,4 Ref=600,50

| Peak # | RetTime [min] | Type | Width [min] | Area [mAU*s] | Height [mAU] | Area %  |
|--------|---------------|------|-------------|--------------|--------------|---------|
| 1      | 2.271         | BB   | 0.0336      | 441.59647    | 203.92654    | 98.5705 |
| 2      | 2.622         | BB   | 0.0290      | 6.40434      | 2.63952      | 1.4295  |

Totals : 448.00081 206.56606

Supplementary Figure 304. LC-MS spectra of 50a, MS: (M+H)<sup>+</sup>, found: 460.1.

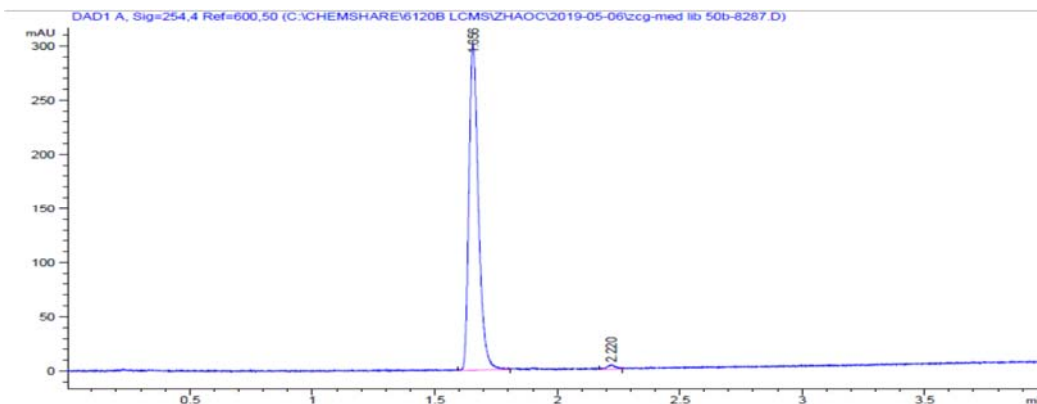

Signal 1: DAD1 A, Sig=254,4 Ref=600,50

| Peak # | RetTime [min] | Type | Width [min] | Area [mAU*s] | Height [mAU] | Area %  |
|--------|---------------|------|-------------|--------------|--------------|---------|
| 1      | 1.656         | BB   | 0.0417      | 815.90704    | 300.61743    | 98.7904 |
| 2      | 2.220         | BB   | 0.0355      | 9.99033      | 3.66457      | 1.2096  |

Totals : 825.89738 304.28200

Supplementary Figure 305. LC-MS spectra of 50b, MS: (M+H)<sup>+</sup>, found: 462.1.

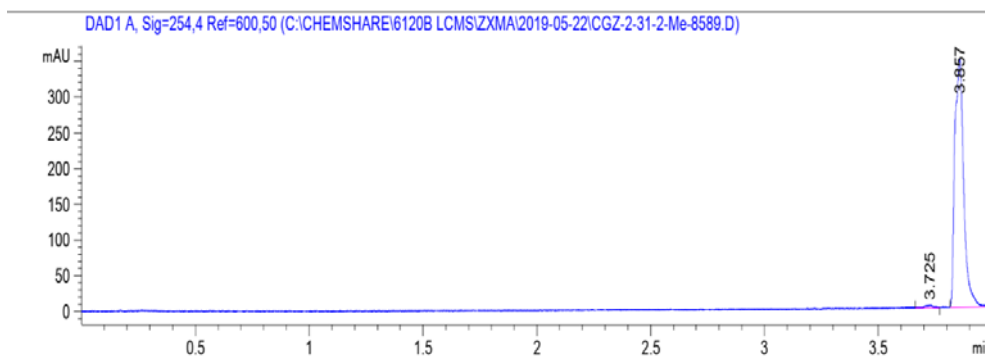

Signal 1: DAD1 A, Sig=254,4 Ref=600,50

| Peak # | RetTime [min] | Type | Width [min] | Area [mAU*s] | Height [mAU] | Area %  |
|--------|---------------|------|-------------|--------------|--------------|---------|
| 1      | 3.725         | BB   | 0.0375      | 9.93899      | 3.26708      | 1.0507  |
| 2      | 3.857         | BB   | 0.0370      | 936.03607    | 348.18356    | 98.9493 |

Totals : 945.97506 351.45064

Supplementary Figure 306. LC-MS spectra of **50c**, MS:  $[M+Na]^+$ , found: 536.2.

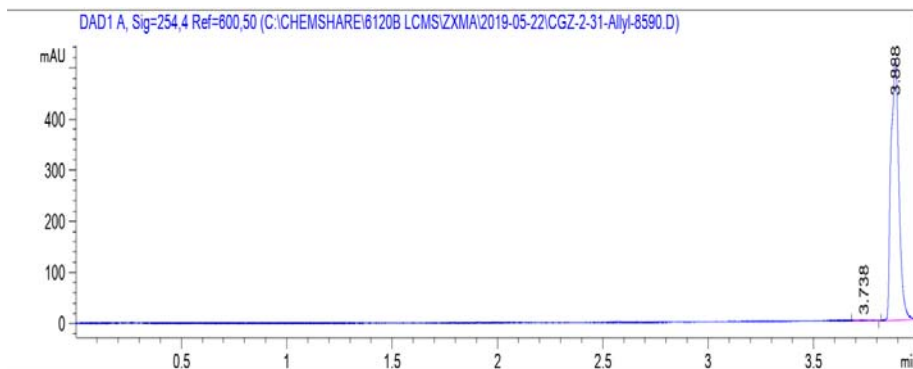

Signal 1: DAD1 A, Sig=254,4 Ref=600,50

| Peak # | RetTime [min] | Type | Width [min] | Area [mAU*s] | Height [mAU] | Area %  |
|--------|---------------|------|-------------|--------------|--------------|---------|
| 1      | 3.738         | BB   | 0.0591      | 6.15278      | 1.24347      | 0.4557  |
| 2      | 3.888         | BB   | 0.0366      | 1344.00378   | 512.34650    | 99.5443 |

Totals : 1350.15657 513.58996

Supplementary Figure 307. LC-MS spectra of **50d**, MS:  $[M+Na]^+$ , found: 562.2.

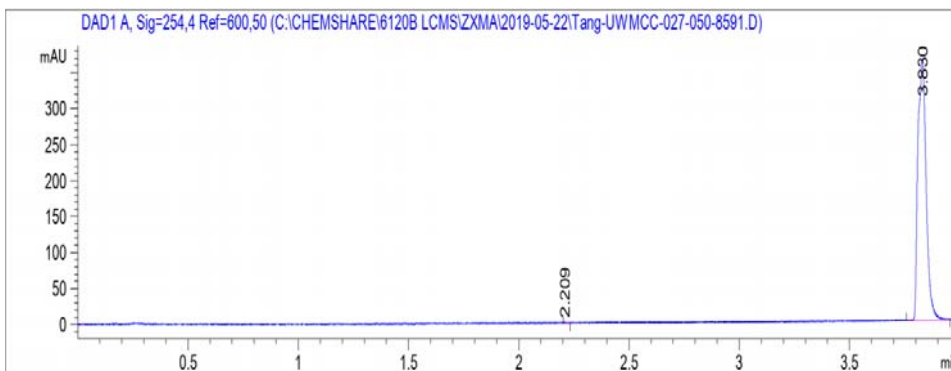

Signal 1: DAD1 A, Sig=254,4 Ref=600,50

| Peak # | RetTime [min] | Type | Width [min] | Area [mAU*s] | Height [mAU] | Area %  |
|--------|---------------|------|-------------|--------------|--------------|---------|
| 1      | 2.209         | BB   | 0.0155      | 1.48769      | 1.22734      | 0.1568  |
| 2      | 3.830         | BB   | 0.0361      | 947.54669    | 363.68616    | 99.8432 |

Totals : 949.03438 364.91350

Supplementary Figure 308. LC-MS spectra of 50f, MS: [M+Na]<sup>+</sup>, found: 580.2.

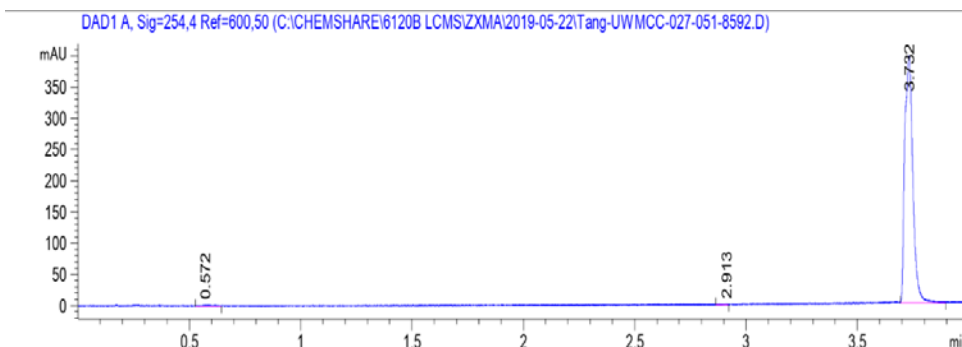

Signal 1: DAD1 A, Sig=254,4 Ref=600,50

| Peak # | RetTime [min] | Type | Width [min] | Area [mAU*s] | Height [mAU] | Area %  |
|--------|---------------|------|-------------|--------------|--------------|---------|
| 1      | 0.572         | BB   | 0.0565      | 6.65231      | 1.41561      | 0.6645  |
| 2      | 2.913         | BB   | 0.0311      | 3.32227      | 1.30031      | 0.3319  |
| 3      | 3.732         | BB   | 0.0350      | 991.12994    | 394.71170    | 99.0036 |

Totals : 1001.10452 397.42762

Supplementary Figure 309. LC-MS spectra of 50g, MS: [M+Na]<sup>+</sup>, found: 566.2.

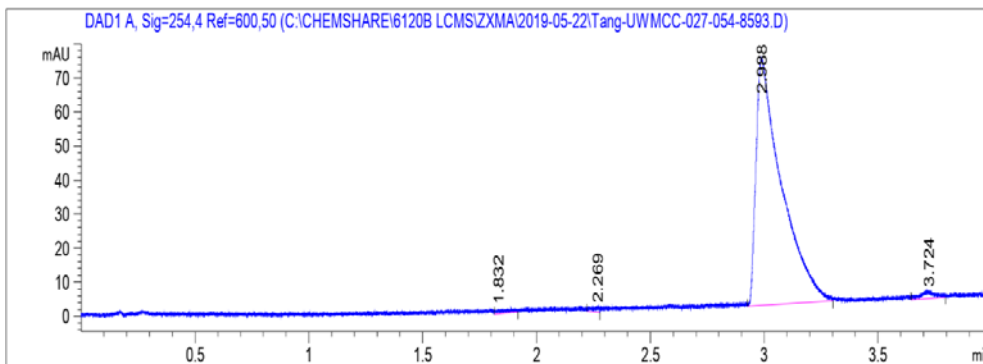

Signal 1: DAD1 A, Sig=254,4 Ref=600,50

| Peak # | RetTime [min] | Type | Width [min] | Area [mAU*s] | Height [mAU] | Area %  |
|--------|---------------|------|-------------|--------------|--------------|---------|
| 1      | 1.832         | BB   | 0.0451      | 4.38731      | 1.17824      | 0.7550  |
| 2      | 2.269         | BB   | 0.0282      | 2.87784      | 1.21984      | 0.4952  |
| 3      | 2.988         | BB   | 0.1000      | 563.86255    | 72.57236     | 97.0273 |
| 4      | 3.724         | BB   | 0.0635      | 10.01015     | 1.92013      | 1.7225  |

Totals : 581.13785 76.89056

Supplementary Figure 310. LC-MS spectra of 50h, MS: [M+H]<sup>+</sup>, found: 571.3.

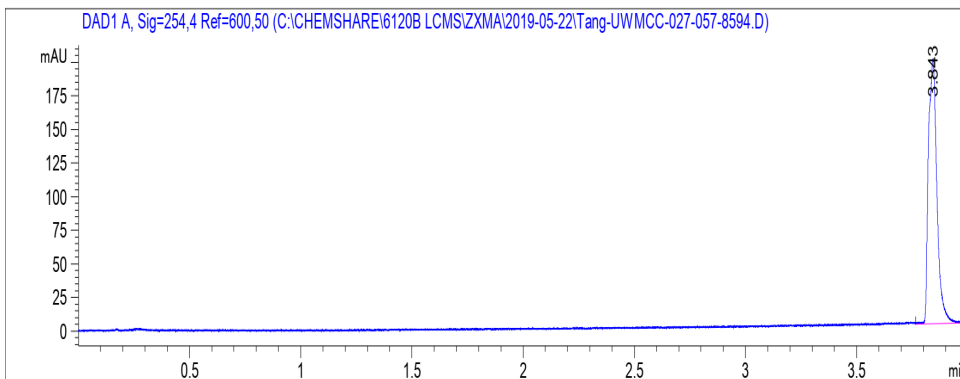

Signal 1: DAD1 A, Sig=254,4 Ref=600,50

| Peak # | RetTime [min] | Type | Width [min] | Area [mAU*s] | Height [mAU] | Area %   |
|--------|---------------|------|-------------|--------------|--------------|----------|
| 1      | 3.843         | BB   | 0.0367      | 524.32275    | 197.11107    | 100.0000 |

Totals : 524.32275 197.11107

Supplementary Figure 311. LC-MS spectra of 50i, MS: [M+Na]<sup>+</sup>, found: 656.2.

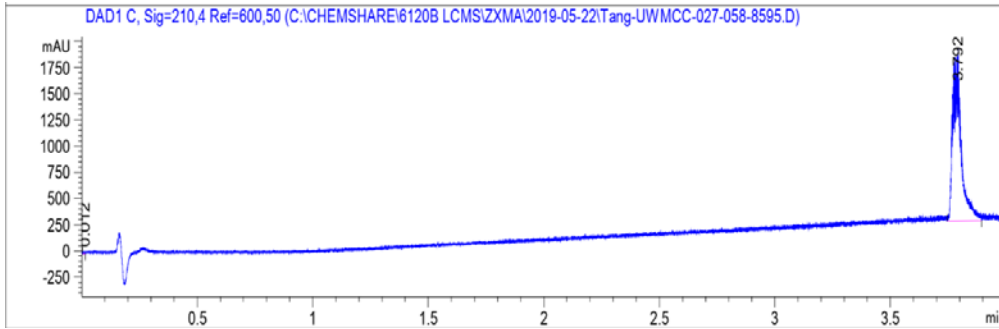

Signal 3: DAD1 C, Sig=210,4 Ref=600,50

| Peak # | RetTime [min] | Type | Width [min] | Area [mAU*s] | Height [mAU] | Area %  |
|--------|---------------|------|-------------|--------------|--------------|---------|
| 1      | 0.012         | BB   | 6.30e-3     | 6.68205      | 15.68771     | 0.1767  |
| 2      | 3.792         | BB   | 0.0334      | 3774.82446   | 1371.34241   | 99.8233 |

Totals : 3781.50652 1387.03012

Supplementary Figure 312. LC-MS spectra of 50j, MS: [M+Na]<sup>+</sup>, found: 656.3.

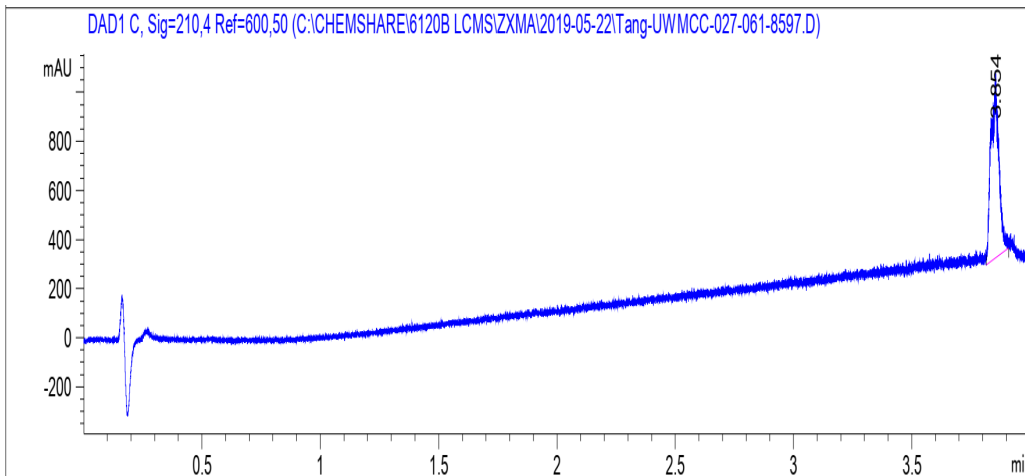

Signal 3: DAD1 C, Sig=210,4 Ref=600,50

| Peak # | RetTime [min] | Type | Width [min] | Area [mAU*s] | Height [mAU] | Area %   |
|--------|---------------|------|-------------|--------------|--------------|----------|
| 1      | 3.854         | BB   | 0.0334      | 1682.32092   | 646.49286    | 100.0000 |

Totals : 1682.32092 646.49286

Supplementary Figure 313. LC-MS spectra of 51c, MS: [M+H]<sup>+</sup>, found: 599.3.

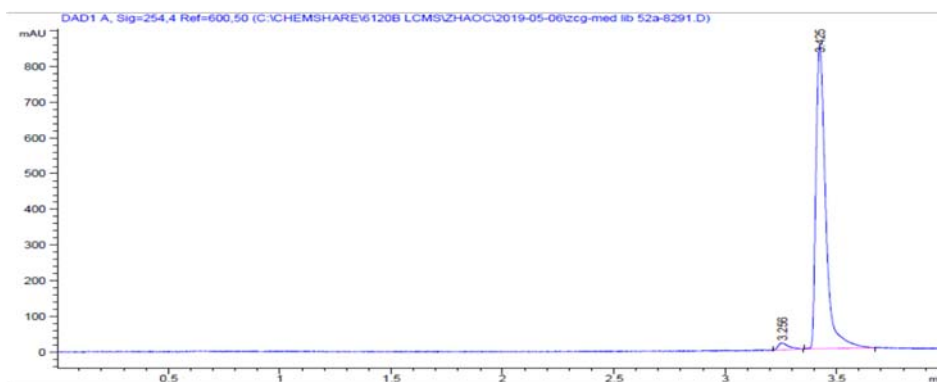

Signal 1: DAD1 A, Sig=254,4 Ref=600,50

| Peak # | RetTime [min] | Type | Width [min] | Area [mAU*s] | Height [mAU] | Area %  |
|--------|---------------|------|-------------|--------------|--------------|---------|
| 1      | 3.256         | BB   | 0.0481      | 65.47691     | 19.22167     | 2.4661  |
| 2      | 3.425         | BB   | 0.0469      | 2589.55884   | 850.38123    | 97.5339 |

Totals : 2655.03575 869.60290

Supplementary Figure 314. LC-MS spectra of **52a**, MS: (M+H)<sup>+</sup>, found: 499.2.

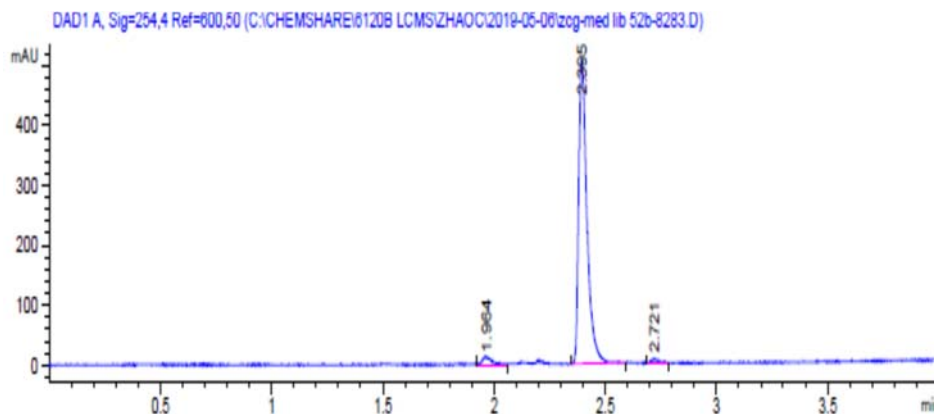

| Peak # | RetTime [min] | Type | Width [min] | Area [mAU*s] | Height [mAU] | Area %  |
|--------|---------------|------|-------------|--------------|--------------|---------|
| 1      | 1.964         | BB   | 0.0444      | 37.45743     | 12.45463     | 2.7150  |
| 2      | 2.395         | BB   | 0.0390      | 1325.41602   | 509.18027    | 96.0676 |
| 3      | 2.721         | BB   | 0.0392      | 16.79672     | 5.95884      | 1.2174  |

Totals : 1379.67017 527.59374

Supplementary Figure 315. LC-MS spectra of **52b**, MS: (M+H)<sup>+</sup>, found: 501.2.



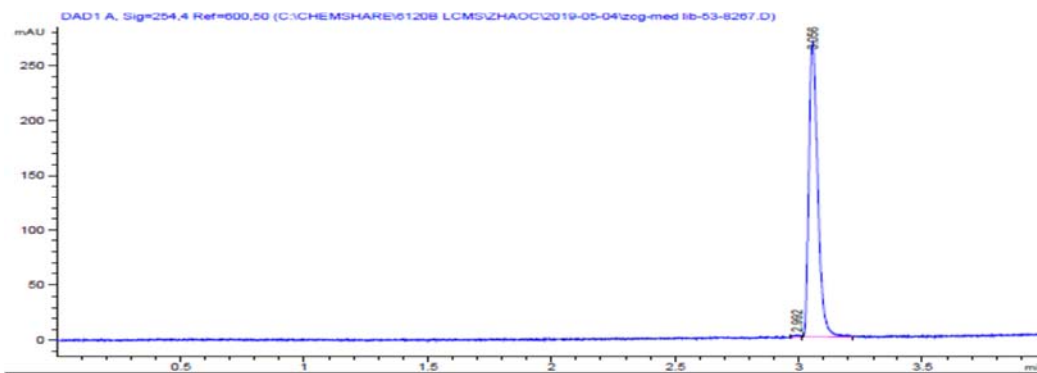

Signal 1: DAD1 A, Sig=254,4 Ref=600,50

| Peak # | RetTime [min] | Type | Width [min] | Area [mAU*s] | Height [mAU] | Area %  |
|--------|---------------|------|-------------|--------------|--------------|---------|
| 1      | 2.992         | BB   | 0.0240      | 3.47980      | 1.84466      | 0.5159  |
| 2      | 3.056         | BB   | 0.0392      | 670.96979    | 267.96042    | 99.4841 |

Totals : 674.44959 269.80508

Supplementary Figure 316. LC-MS spectra of **53**, MS: (M+H)<sup>+</sup>, found: 626.2.

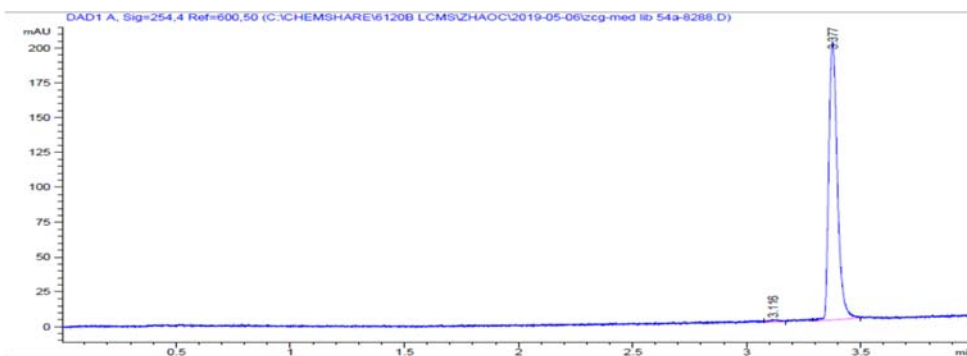

Signal 1: DAD1 A, Sig=254,4 Ref=600,50

| Peak # | RetTime [min] | Type | Width [min] | Area [mAU*s] | Height [mAU] | Area %  |
|--------|---------------|------|-------------|--------------|--------------|---------|
| 1      | 3.116         | BB   | 0.0384      | 5.09895      | 1.60649      | 0.9693  |
| 2      | 3.377         | BB   | 0.0407      | 520.94727    | 199.82138    | 99.0307 |

Totals : 526.04622 201.42787

Supplementary Figure 317. LC-MS spectra of **54a**, MS: (M+H)<sup>+</sup>, found: 612.3.

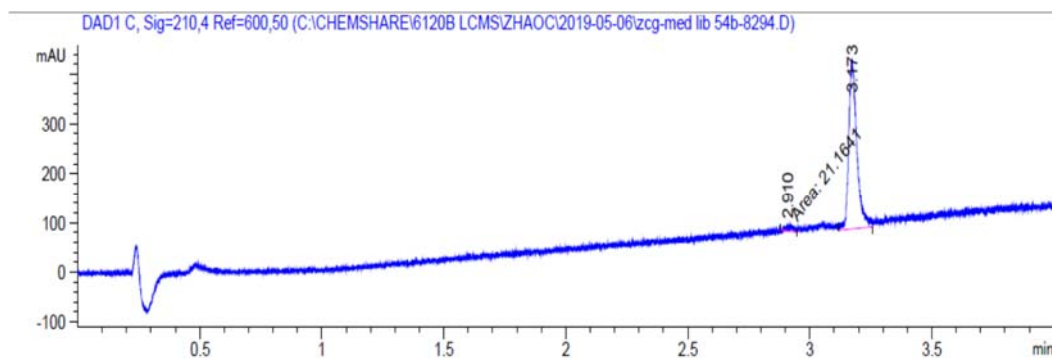

Signal 3: DAD1 C, Sig=210,4 Ref=600,50

| Peak # | RetTime [min] | Type | Width [min] | Area [mAU*s] | Height [mAU] | Area %  |
|--------|---------------|------|-------------|--------------|--------------|---------|
| 1      | 2.910         | MM   | 0.0264      | 21.16409     | 13.37608     | 2.6102  |
| 2      | 3.173         | BB   | 0.0338      | 789.66327    | 335.02640    | 97.3898 |

Totals : 810.82736 348.40248

**Supplementary Figure 318.** LC-MS spectra of **54b**, MS: (M+H)<sup>+</sup>, found: 614.2.

### III. Supplementary References

- [1] Purushottamachar, P., Njar, V. C. O. A New Simple and High-Yield Synthesis of 5 $\alpha$ -Dihydrotestosterone (DHT), a Potent Androgen Receptor Agonist. *Steroids*, **77**, 1530–1534 (2012).
- [2] Sun, J., Dong, Y., Cao, L., Wang, X., Wang, S., Hu, Y. Highly Efficient Chemoselective Deprotection of O,O-Acetals and O,O-Ketals Catalyzed by Molecular Iodine in Acetone. *J. Org. Chem.*, **69**, 8932–8934 (2004).
- [3] Mo, F., N. Lim, H., Dong, G. Bifunctional Ligand-Assisted Catalytic Ketone  $\alpha$ -Alkenylation with Internal Alkynes: Controlled Synthesis of Enones and Mechanistic Studies. *J. Am. Chem. Soc.*, **137**, 15518–15527 (2015).
- [4] Pérez-Estrada, S., Rodríguez-Molina, B., Xiao, L., Santillan, R., Jiménez-Osés, G., Houk, K. N. Garcia-Garibay, M. A. Thermodynamic Evaluation of Aromatic CH/ $\pi$  Interactions and Rotational Entropy in a Molecular Rotor. *J. Am. Chem. Soc.*, **137**, 2175–2178 (2015).
- [5] Felzmann, W., Gmeiner G., Gärtner, P. First synthesis of a pentadeuterated 3'-hydroxystanozolol--an internal standard in doping analysis. *Steroids* **70**, 103–110 (2005).
- [6] Goliaszewski, A. et al. Specific allylic-allylic coupling procedures effected by ligand-induced elimination from di(allylic)palladium species. *Tetrahedron* **41**, 5779–5789 (1985).
- [7] Furrow, M. E., Myers, A. G. Practical Procedures for the Preparation of N-tert-Butyldimethylsilylhydrazones and Their Use in Modified Wolff–Kishner Reductions and in the Synthesis of Vinyl Halides and gem-Dihalides, *J. Am. Chem. Soc.*, **126**, 5436–5445 (2004).
- [8] Horn, E. J. et al. Scalable and sustainable electrochemical allylic C-H oxidation. *Nature* **533**, 77–81 (2016).
- [9] See, Y. Y., Herrmann, A. T., Aihara, Y. Baran, P. S. Scalable C–H Oxidation with Copper: Synthesis of Polyoxypropyranes. *J. Am. Chem. Soc.* **137**, 13776–13779 (2015).
- [10] Künzer, H., Thiel, M. A novel route to 3-alkylated estra-1,3,5(10)-trienes. *Tetrahedron Letters*

29, 1135–1136 (1988).

[11] Bauer, R. A., Wenderski, T. A. & Tan D. S. Biomimetic diversity-oriented synthesis of benzannulated medium rings via ring expansion. *Nat. Chem. Biol.*, **9**, 21–29, (2013).

[12] Bruker-AXS. *APEX3*. Version 2016.5-0. Madison, Wisconsin, USA, (2016).

[13] Krause, L., Herbst-Irmer, R., Sheldrick, G. M. & Stalke, D. *J. Appl. Cryst.* **48**, 3-10 (2015).

[14] Sheldrick, G. M. *XPREP*. Version 2013/1. Georg-August-Universität Göttingen, Göttingen, Germany (2013b).

[15] Sheldrick, G. M. (2013a). The *SHELX* homepage, <http://shelx.uni-ac.gwdg.de/SHELX/>.

[16] Sheldrick, G. M. *Acta Cryst. A*, **71**, 3-8 (2015a).

[17] Sheldrick, G. M. *Acta Cryst. C*, **71**, 3-8 (2015b).

[18] Dolomanov, O. V., Bourhis, L. J., Gildea, R. J., Howard, J. A. K. & Puschmann, H. *J. Appl. Crystallogr.* **42**, 339-341 (2009).

[19] Guzei, I. A. (2007-2013). Programs *Gn*. University of Wisconsin-Madison, Madison, Wisconsin, USA.
